# Supplementary material for: Expression Profiles and Characteristics of Apple lncRNAs in Roots, Phloem, Leaves, Flowers, and Fruit
Source: Int J Mol Sci. 2022 May 25;23(11):5931. doi: 10.3390/ijms23115931 (PMC9180697; doi:10.3390/ijms23115931)
Supplement: Supplementary file 1 [file ijms-23-05931-s001.zip]

Archive with 14 entries (14 files):
- Figure S.pdf
- Table S1.xlsx
- Table S10.xlsx
- table S11.xlsx
- Table S12.xlsx
- Table S13.xlsx
- Table S2.xlsx
- Table S3.xlsx
- Table S4.xlsx
- Table S5.xlsx
- Table S6.xlsx
- Table S7.xlsx
- Table S8.xlsx
- Table S9.xlsx
