# Supplementary material for: Expression Profiles and Characteristics of Apple lncRNAs in Roots, Phloem, Leaves, Flowers, and Fruit
Source: Int J Mol Sci. 2022 May 25;23(11):5931. doi: 10.3390/ijms23115931 (PMC9180697; doi:10.3390/ijms23115931)

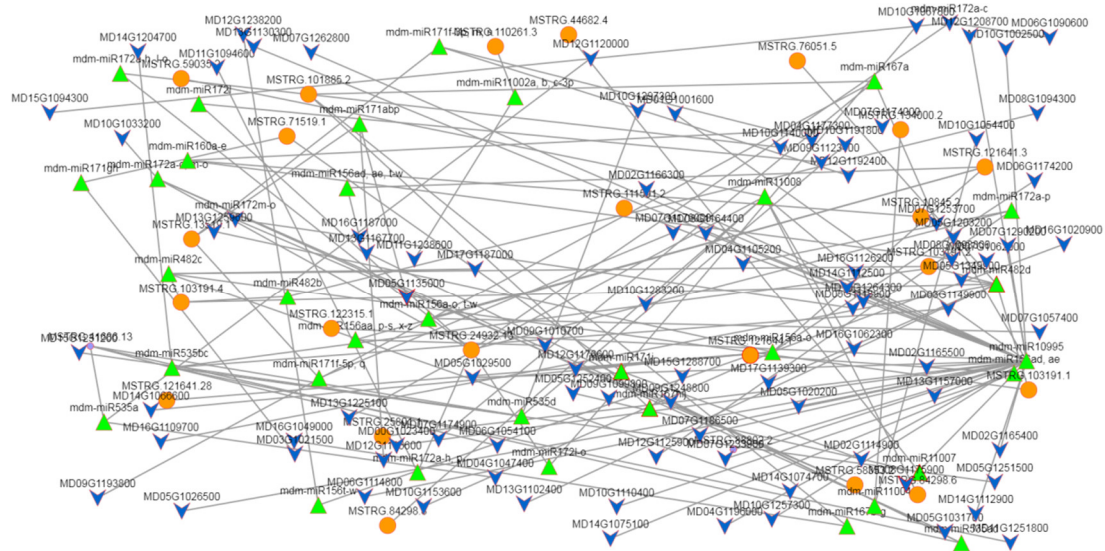

**Figure S1.** Potential lncRNA-miRNA-mRNA networks in all five tissues (orange circle: lncRNAs; green triangle: mdm-miRNAs; blue arrow: mRNAs).

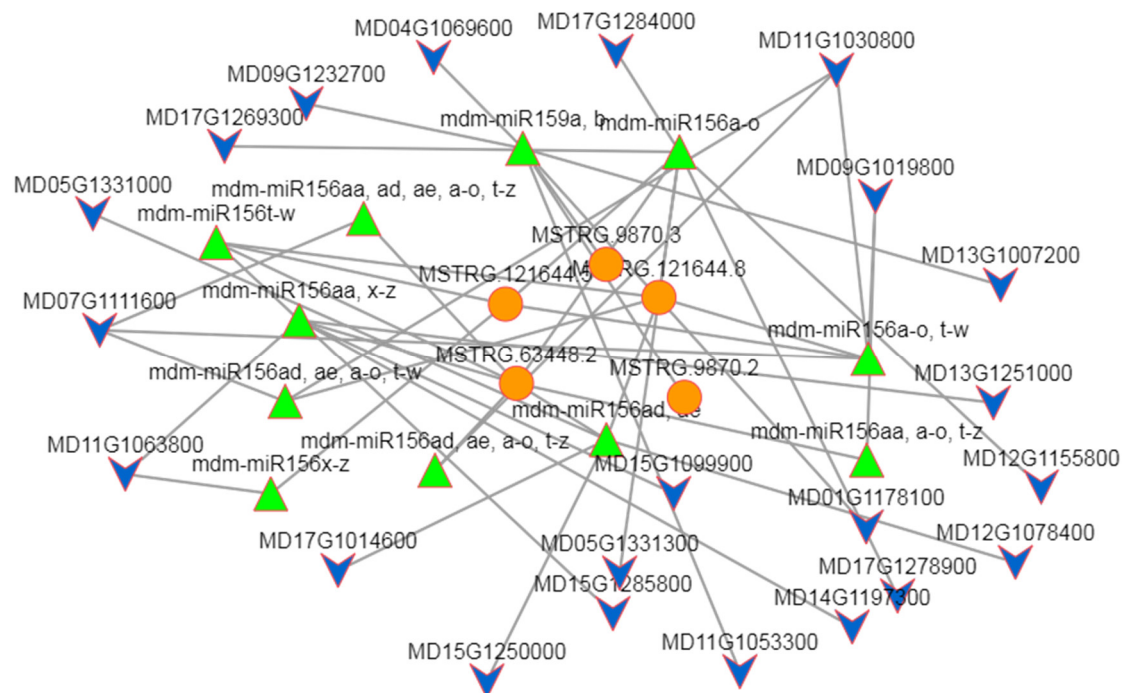

**Figure S2.** Potential lncRNA-miRNA-mRNA networks in roots only.

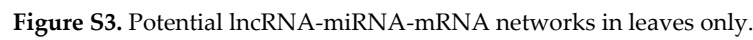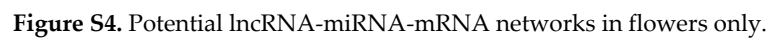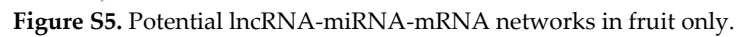

Supplement: Supplementary file 1 [file ijms-23-05931-s001.zip › Figure S.pdf]
