# Supplementary material for: Expression Profiles and Characteristics of Apple lncRNAs in Roots, Phloem, Leaves, Flowers, and Fruit
Source: Int J Mol Sci. 2022 May 25;23(11):5931. doi: 10.3390/ijms23115931 (PMC9180697; doi:10.3390/ijms23115931)
Supplement: Supplementary file 1 [file ijms-23-05931-s001.zip › Table S1.xlsx]

## Sheet: Sheet1
Table S1 Comparative results of clean data regarding reference genome
No.	Sample_ID	Total Reads	Mapped Reads	Uniq Map Reads	Multiple Map Reads	Reads Map to '+'	Reads Map to '-'
1	Flower-1	131182226	107325498(81.81%)	103978237(79.26%)	3347261(2.55%)	52901539(40.33%)	53185338(40.54%)
2	Flower-2	120951496	96839060(80.06%)	93980326(77.70%)	2858734(2.36%)	47782265(39.51%)	48179439(39.83%)
3	Flower-3	130886824	107929218(82.46%)	104235779(79.64%)	3693439(2.82%)	53087974(40.56%)	53347574(40.76%)
4	Phloem-1	181414950	146959343(81.01%)	137935487(76.03%)	9023856(4.97%)	70377956(38.79%)	70666716(38.95%)
5	Phloem-2	136371318	113742613(83.41%)	101910793(74.73%)	11831820(8.68%)	52078369(38.19%)	52207716(38.28%)
6	Phloem-3	110002720	87733946(79.76%)	82970580(75.43%)	4763366(4.33%)	42275160(38.43%)	42480516(38.62%)
7	Leaf-1	108646390	74017195(68.13%)	71344042(65.67%)	2673153(2.46%)	36026825(33.16%)	36432287(33.53%)
8	Leaf-2	152463838	102586880(67.29%)	100215806(65.73%)	2371074(1.56%)	50615629(33.20%)	51206342(33.59%)
9	Leaf-3	175174812	121248611(69.22%)	118526219(67.66%)	2722392(1.55%)	59930832(34.21%)	60570840(34.58%)
10	Root-1	135883994	108451440(79.81%)	99789097(73.44%)	8662343(6.37%)	51060637(37.58%)	51159368(37.65%)
11	Root-2	145515592	116679410(80.18%)	110032585(75.62%)	6646825(4.57%)	56233574(38.64%)	56487689(38.82%)
12	Root-3	162146546	13275570(81.87%)9	118674927(73.19%)	14080782(8.68%)	44623670(27.52%)	44840286(27.65%)
13	Fruit-1	150626022	11890930(78.94%)3	114462048(75.99%)	4447255(2.95%)	58966410(39.15%)	59190400(39.30%)
14	Fruit-2	138852708	110650522(79.69%)	106290873(76.55%)	4359649(3.14%)	54878397(39.52%)	55099056(39.68%)
15	Fruit-3	149649772	123882506(82.78%)	103681925(69.28%)	20200581(13.50%)	53873827(36.00%)	53925806(36.03%)
