# Supplementary material for: Expression Profiles and Characteristics of Apple lncRNAs in Roots, Phloem, Leaves, Flowers, and Fruit
Source: Int J Mol Sci. 2022 May 25;23(11):5931. doi: 10.3390/ijms23115931 (PMC9180697; doi:10.3390/ijms23115931)
Supplement: Supplementary file 1 [file ijms-23-05931-s001.zip › Table S2.xlsx]

## Sheet: Sheet1
Table S2 Evaluation of sequencing data
No.	Sample_ID	ReadSum	BaseSum	Ratio of mapped reads（%）	GC(%)	Q30(%)
1	Flower-1	65591113	19599396348	0.8181	45.8	94.85
2	Flower-2	60475748	18074290002	0.8006	45.73	92.56
3	Flower-3	65443412	19536631562	0.8246	45.88	95.48
4	Phloem-1	90707475	27117426764	0.8101	45.65	95.37
5	Phloem-2	68185659	20388235722	0.8341	46.53	95.57
6	Phloem-3	55001360	16431445340	0.7976	46.29	95.32
7	Leaf-1	54323195	16246525664	0.6813	44.73	95.48
8	Leaf-2	76231919	22820656720	0.6729	44.08	95.22
9	Leaf-3	87587406	26195372526	0.6922	44.24	95.65
10	Root-1	67941997	20317613054	0.7981	46.08	95.65
11	Root-2	72757796	21772785288	0.8018	46.77	95.48
12	Root-3	81073273	24225178790	0.8187	47.32	95.41
13	Fruit-1	75313011	22560582496	0.7894	45.94	91.99
14	Fruit-2	69426354	20797224280	0.7969	46.05	92.02
15	Fruit-3	74824886	22416222250	0.8278	48.75	91.99
