# Supplementary material for: Expression Profiles and Characteristics of Apple lncRNAs in Roots, Phloem, Leaves, Flowers, and Fruit
Source: Int J Mol Sci. 2022 May 25;23(11):5931. doi: 10.3390/ijms23115931 (PMC9180697; doi:10.3390/ijms23115931)
Supplement: Supplementary file 1 [file ijms-23-05931-s001.zip › Table S3.xlsx]

## Sheet: Sheet1
Table S3 Types of lncRNAs
No.	LncRNA_ID	LncRNA_type
1	MSTRG.82351.1	anti-sense_lncRNA
2	MSTRG.48855.2	anti-sense_lncRNA
3	MSTRG.8731.1	anti-sense_lncRNA
4	MSTRG.92449.1	anti-sense_lncRNA
5	MSTRG.23445.5	anti-sense_lncRNA
6	MSTRG.83933.1	anti-sense_lncRNA
7	MSTRG.34692.9	anti-sense_lncRNA
8	MSTRG.23675.1	anti-sense_lncRNA
9	MSTRG.88090.1	anti-sense_lncRNA
10	MSTRG.124329.11	anti-sense_lncRNA
11	MSTRG.15304.11	anti-sense_lncRNA
12	MSTRG.67612.1	anti-sense_lncRNA
13	MSTRG.76348.2	anti-sense_lncRNA
14	MSTRG.843.1	anti-sense_lncRNA
15	MSTRG.77225.92	anti-sense_lncRNA
16	MSTRG.99033.2	anti-sense_lncRNA
17	MSTRG.46872.1	anti-sense_lncRNA
18	MSTRG.76333.2	anti-sense_lncRNA
19	MSTRG.12302.1	anti-sense_lncRNA
20	MSTRG.37421.2	anti-sense_lncRNA
21	MSTRG.122096.1	anti-sense_lncRNA
22	MSTRG.141218.1	anti-sense_lncRNA
23	MSTRG.61587.1	anti-sense_lncRNA
24	MSTRG.136249.1	anti-sense_lncRNA
25	MSTRG.95611.1	anti-sense_lncRNA
26	MSTRG.100183.2	anti-sense_lncRNA
27	MSTRG.57193.1	anti-sense_lncRNA
28	MSTRG.11331.1	anti-sense_lncRNA
29	MSTRG.23189.1	anti-sense_lncRNA
30	MSTRG.127322.3	anti-sense_lncRNA
31	MSTRG.126497.1	anti-sense_lncRNA
32	MSTRG.140604.2	anti-sense_lncRNA
33	MSTRG.80385.4	anti-sense_lncRNA
34	MSTRG.72339.1	anti-sense_lncRNA
35	MSTRG.25255.1	anti-sense_lncRNA
36	MSTRG.33212.21	anti-sense_lncRNA
37	MSTRG.49801.2	anti-sense_lncRNA
38	MSTRG.143520.1	anti-sense_lncRNA
39	MSTRG.3925.1	anti-sense_lncRNA
40	MSTRG.141800.1	anti-sense_lncRNA
41	MSTRG.105522.2	anti-sense_lncRNA
42	MSTRG.27755.3	anti-sense_lncRNA
43	MSTRG.47928.1	anti-sense_lncRNA
44	MSTRG.125897.1	anti-sense_lncRNA
45	MSTRG.54584.1	anti-sense_lncRNA
46	MSTRG.123723.2	anti-sense_lncRNA
47	MSTRG.120409.1	anti-sense_lncRNA
48	MSTRG.54606.2	anti-sense_lncRNA
49	MSTRG.132283.3	anti-sense_lncRNA
50	MSTRG.68185.1	anti-sense_lncRNA
51	MSTRG.35965.2	anti-sense_lncRNA
52	MSTRG.8179.1	anti-sense_lncRNA
53	MSTRG.73966.11	anti-sense_lncRNA
54	MSTRG.29320.2	anti-sense_lncRNA
55	MSTRG.27434.2	anti-sense_lncRNA
56	MSTRG.33212.22	anti-sense_lncRNA
57	MSTRG.141962.2	anti-sense_lncRNA
58	MSTRG.86471.1	anti-sense_lncRNA
59	MSTRG.76397.1	anti-sense_lncRNA
60	MSTRG.62279.1	anti-sense_lncRNA
61	MSTRG.15529.4	anti-sense_lncRNA
62	MSTRG.73089.1	anti-sense_lncRNA
63	MSTRG.83935.1	anti-sense_lncRNA
64	MSTRG.53943.2	anti-sense_lncRNA
65	MSTRG.129156.1	anti-sense_lncRNA
66	MSTRG.19895.2	anti-sense_lncRNA
67	MSTRG.83741.1	anti-sense_lncRNA
68	MSTRG.23445.1	anti-sense_lncRNA
69	MSTRG.69560.1	anti-sense_lncRNA
70	MSTRG.69721.1	anti-sense_lncRNA
71	MSTRG.8374.1	anti-sense_lncRNA
72	MSTRG.69932.1	anti-sense_lncRNA
73	MSTRG.45940.1	anti-sense_lncRNA
74	MSTRG.20395.2	anti-sense_lncRNA
75	MSTRG.131447.2	anti-sense_lncRNA
76	MSTRG.17430.4	anti-sense_lncRNA
77	MSTRG.41968.1	anti-sense_lncRNA
78	MSTRG.90439.1	anti-sense_lncRNA
79	MSTRG.65492.3	anti-sense_lncRNA
80	MSTRG.42020.1	anti-sense_lncRNA
81	MSTRG.67906.1	anti-sense_lncRNA
82	MSTRG.19483.1	anti-sense_lncRNA
83	MSTRG.50378.2	anti-sense_lncRNA
84	MSTRG.32552.3	anti-sense_lncRNA
85	MSTRG.51194.1	anti-sense_lncRNA
86	MSTRG.11237.1	anti-sense_lncRNA
87	MSTRG.99188.1	anti-sense_lncRNA
88	MSTRG.17268.1	anti-sense_lncRNA
89	MSTRG.83696.18	anti-sense_lncRNA
90	MSTRG.128368.1	anti-sense_lncRNA
91	MSTRG.102129.2	anti-sense_lncRNA
92	MSTRG.87219.1	anti-sense_lncRNA
93	MSTRG.95008.6	anti-sense_lncRNA
94	MSTRG.66589.1	anti-sense_lncRNA
95	MSTRG.68935.1	anti-sense_lncRNA
96	MSTRG.83424.2	anti-sense_lncRNA
97	MSTRG.112986.1	anti-sense_lncRNA
98	MSTRG.78508.1	anti-sense_lncRNA
99	MSTRG.24483.1	anti-sense_lncRNA
100	MSTRG.20823.1	anti-sense_lncRNA
101	MSTRG.37754.1	anti-sense_lncRNA
102	MSTRG.49015.2	anti-sense_lncRNA
103	MSTRG.139208.1	anti-sense_lncRNA
104	MSTRG.79280.2	anti-sense_lncRNA
105	MSTRG.85850.1	anti-sense_lncRNA
106	MSTRG.35765.1	anti-sense_lncRNA
107	MSTRG.67537.1	anti-sense_lncRNA
108	MSTRG.13222.1	anti-sense_lncRNA
109	MSTRG.59210.1	anti-sense_lncRNA
110	MSTRG.27344.2	anti-sense_lncRNA
111	MSTRG.121529.1	anti-sense_lncRNA
112	MSTRG.86315.9	anti-sense_lncRNA
113	MSTRG.41478.3	anti-sense_lncRNA
114	MSTRG.97038.1	anti-sense_lncRNA
115	MSTRG.92392.2	anti-sense_lncRNA
116	MSTRG.37482.1	anti-sense_lncRNA
117	MSTRG.33212.20	anti-sense_lncRNA
118	MSTRG.16333.1	anti-sense_lncRNA
119	MSTRG.36333.1	anti-sense_lncRNA
120	MSTRG.132166.1	anti-sense_lncRNA
121	MSTRG.128985.1	anti-sense_lncRNA
122	MSTRG.82112.1	anti-sense_lncRNA
123	MSTRG.134486.1	anti-sense_lncRNA
124	MSTRG.32552.6	anti-sense_lncRNA
125	MSTRG.22891.1	anti-sense_lncRNA
126	MSTRG.1530.1	anti-sense_lncRNA
127	MSTRG.68109.1	anti-sense_lncRNA
128	MSTRG.90787.1	anti-sense_lncRNA
129	MSTRG.82133.1	anti-sense_lncRNA
130	MSTRG.39752.1	anti-sense_lncRNA
131	MSTRG.17378.2	anti-sense_lncRNA
132	MSTRG.124205.1	anti-sense_lncRNA
133	MSTRG.77532.2	anti-sense_lncRNA
134	MSTRG.99984.4	anti-sense_lncRNA
135	MSTRG.16941.1	anti-sense_lncRNA
136	MSTRG.79198.1	anti-sense_lncRNA
137	MSTRG.72466.12	anti-sense_lncRNA
138	MSTRG.54160.1	anti-sense_lncRNA
139	MSTRG.82446.1	anti-sense_lncRNA
140	MSTRG.27434.1	anti-sense_lncRNA
141	MSTRG.65377.2	anti-sense_lncRNA
142	MSTRG.132913.1	anti-sense_lncRNA
143	MSTRG.82654.1	anti-sense_lncRNA
144	MSTRG.133803.2	anti-sense_lncRNA
145	MSTRG.81106.17	anti-sense_lncRNA
146	MSTRG.13085.1	anti-sense_lncRNA
147	MSTRG.836.2	anti-sense_lncRNA
148	MSTRG.50433.2	anti-sense_lncRNA
149	MSTRG.139475.1	anti-sense_lncRNA
150	MSTRG.109301.1	anti-sense_lncRNA
151	MSTRG.105432.4	anti-sense_lncRNA
152	MSTRG.99981.1	anti-sense_lncRNA
153	MSTRG.65138.1	anti-sense_lncRNA
154	MSTRG.18483.1	anti-sense_lncRNA
155	MSTRG.1524.1	anti-sense_lncRNA
156	MSTRG.84322.1	anti-sense_lncRNA
157	MSTRG.55149.1	anti-sense_lncRNA
158	MSTRG.12547.1	anti-sense_lncRNA
159	MSTRG.6500.1	anti-sense_lncRNA
160	MSTRG.122698.1	anti-sense_lncRNA
161	MSTRG.104665.2	anti-sense_lncRNA
162	MSTRG.139639.2	anti-sense_lncRNA
163	MSTRG.54996.2	anti-sense_lncRNA
164	MSTRG.7517.4	anti-sense_lncRNA
165	MSTRG.54826.1	anti-sense_lncRNA
166	MSTRG.68313.3	anti-sense_lncRNA
167	MSTRG.71879.3	anti-sense_lncRNA
168	MSTRG.69317.6	anti-sense_lncRNA
169	MSTRG.59035.2	anti-sense_lncRNA
170	MSTRG.36245.1	anti-sense_lncRNA
171	MSTRG.129420.1	anti-sense_lncRNA
172	MSTRG.73210.1	anti-sense_lncRNA
173	MSTRG.69038.1	anti-sense_lncRNA
174	MSTRG.107586.8	anti-sense_lncRNA
175	MSTRG.23445.4	anti-sense_lncRNA
176	MSTRG.124912.1	anti-sense_lncRNA
177	MSTRG.47249.1	anti-sense_lncRNA
178	MSTRG.17318.1	anti-sense_lncRNA
179	MSTRG.72466.7	anti-sense_lncRNA
180	MSTRG.129614.1	anti-sense_lncRNA
181	MSTRG.55639.1	anti-sense_lncRNA
182	MSTRG.21738.1	anti-sense_lncRNA
183	MSTRG.51100.2	anti-sense_lncRNA
184	MSTRG.47103.1	anti-sense_lncRNA
185	MSTRG.131546.1	anti-sense_lncRNA
186	MSTRG.86315.8	anti-sense_lncRNA
187	MSTRG.95609.1	anti-sense_lncRNA
188	MSTRG.86075.2	anti-sense_lncRNA
189	MSTRG.92891.1	anti-sense_lncRNA
190	MSTRG.106277.1	anti-sense_lncRNA
191	MSTRG.140726.3	anti-sense_lncRNA
192	MSTRG.66733.1	anti-sense_lncRNA
193	MSTRG.46998.1	anti-sense_lncRNA
194	MSTRG.64453.1	anti-sense_lncRNA
195	MSTRG.115480.1	anti-sense_lncRNA
196	MSTRG.125224.1	anti-sense_lncRNA
197	MSTRG.90581.8	anti-sense_lncRNA
198	MSTRG.59836.1	anti-sense_lncRNA
199	MSTRG.30481.1	anti-sense_lncRNA
200	MSTRG.96104.3	anti-sense_lncRNA
201	MSTRG.101148.1	anti-sense_lncRNA
202	MSTRG.27105.19	anti-sense_lncRNA
203	MSTRG.20320.1	anti-sense_lncRNA
204	MSTRG.124799.1	anti-sense_lncRNA
205	MSTRG.24170.1	anti-sense_lncRNA
206	MSTRG.140403.1	anti-sense_lncRNA
207	MSTRG.40536.1	anti-sense_lncRNA
208	MSTRG.109036.1	anti-sense_lncRNA
209	MSTRG.35007.5	anti-sense_lncRNA
210	MSTRG.78265.1	anti-sense_lncRNA
211	MSTRG.73777.1	anti-sense_lncRNA
212	MSTRG.33212.7	anti-sense_lncRNA
213	MSTRG.91900.2	anti-sense_lncRNA
214	MSTRG.14764.1	anti-sense_lncRNA
215	MSTRG.31293.2	anti-sense_lncRNA
216	MSTRG.86082.1	anti-sense_lncRNA
217	MSTRG.140332.2	anti-sense_lncRNA
218	MSTRG.135042.1	anti-sense_lncRNA
219	MSTRG.69647.2	anti-sense_lncRNA
220	MSTRG.31293.4	anti-sense_lncRNA
221	MSTRG.110129.1	anti-sense_lncRNA
222	MSTRG.138914.3	anti-sense_lncRNA
223	MSTRG.141226.1	anti-sense_lncRNA
224	MSTRG.53154.2	anti-sense_lncRNA
225	MSTRG.15289.1	anti-sense_lncRNA
226	MSTRG.28909.1	anti-sense_lncRNA
227	MSTRG.42450.1	anti-sense_lncRNA
228	MSTRG.12896.8	anti-sense_lncRNA
229	MSTRG.54485.1	anti-sense_lncRNA
230	MSTRG.90593.5	anti-sense_lncRNA
231	MSTRG.86471.2	anti-sense_lncRNA
232	MSTRG.84272.1	anti-sense_lncRNA
233	MSTRG.47865.1	anti-sense_lncRNA
234	MSTRG.39347.1	anti-sense_lncRNA
235	MSTRG.139207.2	anti-sense_lncRNA
236	MSTRG.97822.1	anti-sense_lncRNA
237	MSTRG.121148.1	anti-sense_lncRNA
238	MSTRG.48855.3	anti-sense_lncRNA
239	MSTRG.77225.4	anti-sense_lncRNA
240	MSTRG.69550.1	anti-sense_lncRNA
241	MSTRG.117067.2	anti-sense_lncRNA
242	MSTRG.101016.2	anti-sense_lncRNA
243	MSTRG.39361.1	anti-sense_lncRNA
244	MSTRG.32552.4	anti-sense_lncRNA
245	MSTRG.71665.1	anti-sense_lncRNA
246	MSTRG.73339.1	anti-sense_lncRNA
247	MSTRG.7615.5	anti-sense_lncRNA
248	MSTRG.6590.2	anti-sense_lncRNA
249	MSTRG.16502.1	anti-sense_lncRNA
250	MSTRG.59035.3	anti-sense_lncRNA
251	MSTRG.722.2	anti-sense_lncRNA
252	MSTRG.86315.10	anti-sense_lncRNA
253	MSTRG.47616.1	anti-sense_lncRNA
254	MSTRG.60497.2	anti-sense_lncRNA
255	MSTRG.113635.1	anti-sense_lncRNA
256	MSTRG.14611.1	anti-sense_lncRNA
257	MSTRG.63561.2	anti-sense_lncRNA
258	MSTRG.14315.1	anti-sense_lncRNA
259	MSTRG.37634.1	anti-sense_lncRNA
260	MSTRG.90377.1	anti-sense_lncRNA
261	MSTRG.126450.1	anti-sense_lncRNA
262	MSTRG.113859.1	anti-sense_lncRNA
263	MSTRG.127648.2	anti-sense_lncRNA
264	MSTRG.14754.47	anti-sense_lncRNA
265	MSTRG.23445.2	anti-sense_lncRNA
266	MSTRG.86878.1	anti-sense_lncRNA
267	MSTRG.126097.2	anti-sense_lncRNA
268	MSTRG.6451.1	anti-sense_lncRNA
269	MSTRG.89511.3	anti-sense_lncRNA
270	MSTRG.15521.1	anti-sense_lncRNA
271	MSTRG.20187.2	anti-sense_lncRNA
272	MSTRG.57135.2	anti-sense_lncRNA
273	MSTRG.14826.1	anti-sense_lncRNA
274	MSTRG.134487.1	anti-sense_lncRNA
275	MSTRG.55675.1	anti-sense_lncRNA
276	MSTRG.129269.1	anti-sense_lncRNA
277	MSTRG.28710.2	anti-sense_lncRNA
278	MSTRG.132697.1	anti-sense_lncRNA
279	MSTRG.21041.4	anti-sense_lncRNA
280	MSTRG.27105.20	anti-sense_lncRNA
281	MSTRG.88223.4	anti-sense_lncRNA
282	MSTRG.11237.3	anti-sense_lncRNA
283	MSTRG.109216.1	anti-sense_lncRNA
284	MSTRG.12854.2	anti-sense_lncRNA
285	MSTRG.95882.1	anti-sense_lncRNA
286	MSTRG.24421.3	anti-sense_lncRNA
287	MSTRG.77345.1	anti-sense_lncRNA
288	MSTRG.129489.1	anti-sense_lncRNA
289	MSTRG.23090.1	anti-sense_lncRNA
290	MSTRG.15241.2	anti-sense_lncRNA
291	MSTRG.85448.1	anti-sense_lncRNA
292	MSTRG.23445.3	anti-sense_lncRNA
293	MSTRG.102833.1	anti-sense_lncRNA
294	MSTRG.33212.9	anti-sense_lncRNA
295	MSTRG.68310.1	anti-sense_lncRNA
296	MSTRG.55000.2	anti-sense_lncRNA
297	MSTRG.69212.2	anti-sense_lncRNA
298	MSTRG.37418.1	anti-sense_lncRNA
299	MSTRG.28953.3	anti-sense_lncRNA
300	MSTRG.33147.1	anti-sense_lncRNA
301	MSTRG.51283.1	anti-sense_lncRNA
302	MSTRG.98130.1	anti-sense_lncRNA
303	MSTRG.91900.1	anti-sense_lncRNA
304	MSTRG.30147.2	anti-sense_lncRNA
305	MSTRG.55742.1	anti-sense_lncRNA
306	MSTRG.122039.7	anti-sense_lncRNA
307	MSTRG.141314.25	anti-sense_lncRNA
308	MSTRG.16062.1	anti-sense_lncRNA
309	MSTRG.140614.1	anti-sense_lncRNA
310	MSTRG.23534.1	anti-sense_lncRNA
311	MSTRG.25366.1	anti-sense_lncRNA
312	MSTRG.47737.1	anti-sense_lncRNA
313	MSTRG.14286.1	anti-sense_lncRNA
314	MSTRG.97020.1	anti-sense_lncRNA
315	MSTRG.132192.5	anti-sense_lncRNA
316	MSTRG.76066.2	anti-sense_lncRNA
317	MSTRG.44664.1	anti-sense_lncRNA
318	MSTRG.51357.1	anti-sense_lncRNA
319	MSTRG.7517.3	anti-sense_lncRNA
320	MSTRG.89936.3	anti-sense_lncRNA
321	MSTRG.127788.2	anti-sense_lncRNA
322	MSTRG.2692.1	anti-sense_lncRNA
323	MSTRG.51286.1	anti-sense_lncRNA
324	MSTRG.132748.3	anti-sense_lncRNA
325	MSTRG.141314.29	anti-sense_lncRNA
326	MSTRG.62235.1	anti-sense_lncRNA
327	MSTRG.51370.1	anti-sense_lncRNA
328	MSTRG.105740.1	anti-sense_lncRNA
329	MSTRG.90974.1	anti-sense_lncRNA
330	MSTRG.52022.1	anti-sense_lncRNA
331	MSTRG.62950.1	anti-sense_lncRNA
332	MSTRG.57707.1	anti-sense_lncRNA
333	MSTRG.23522.1	anti-sense_lncRNA
334	MSTRG.22045.1	anti-sense_lncRNA
335	MSTRG.54075.30	anti-sense_lncRNA
336	MSTRG.126342.1	anti-sense_lncRNA
337	MSTRG.74599.1	anti-sense_lncRNA
338	MSTRG.76048.10	anti-sense_lncRNA
339	MSTRG.122951.1	anti-sense_lncRNA
340	MSTRG.42597.1	anti-sense_lncRNA
341	MSTRG.99050.17	anti-sense_lncRNA
342	MSTRG.41289.1	anti-sense_lncRNA
343	MSTRG.46111.1	anti-sense_lncRNA
344	MSTRG.56967.1	anti-sense_lncRNA
345	MSTRG.45601.1	anti-sense_lncRNA
346	MSTRG.144890.1	anti-sense_lncRNA
347	MSTRG.54215.1	anti-sense_lncRNA
348	MSTRG.139130.1	anti-sense_lncRNA
349	MSTRG.77225.14	anti-sense_lncRNA
350	MSTRG.62294.1	anti-sense_lncRNA
351	MSTRG.2677.3	anti-sense_lncRNA
352	MSTRG.31293.3	anti-sense_lncRNA
353	MSTRG.93823.1	anti-sense_lncRNA
354	MSTRG.4770.2	anti-sense_lncRNA
355	MSTRG.134947.1	anti-sense_lncRNA
356	MSTRG.129618.1	anti-sense_lncRNA
357	MSTRG.67789.1	anti-sense_lncRNA
358	MSTRG.84127.1	anti-sense_lncRNA
359	MSTRG.141854.1	anti-sense_lncRNA
360	MSTRG.85608.1	anti-sense_lncRNA
361	MSTRG.48855.1	anti-sense_lncRNA
362	MSTRG.123844.1	anti-sense_lncRNA
363	MSTRG.56028.2	anti-sense_lncRNA
364	MSTRG.51286.3	anti-sense_lncRNA
365	MSTRG.87381.2	anti-sense_lncRNA
366	MSTRG.97297.1	anti-sense_lncRNA
367	MSTRG.42932.1	anti-sense_lncRNA
368	MSTRG.79280.1	anti-sense_lncRNA
369	MSTRG.31649.1	anti-sense_lncRNA
370	MSTRG.15641.1	anti-sense_lncRNA
371	MSTRG.16079.1	anti-sense_lncRNA
372	MSTRG.131332.1	anti-sense_lncRNA
373	MSTRG.18199.2	anti-sense_lncRNA
374	MSTRG.45226.1	anti-sense_lncRNA
375	MSTRG.56473.1	anti-sense_lncRNA
376	MSTRG.35007.3	anti-sense_lncRNA
377	MSTRG.86793.4	anti-sense_lncRNA
378	MSTRG.31960.2	anti-sense_lncRNA
379	MSTRG.139636.2	anti-sense_lncRNA
380	MSTRG.1494.1	anti-sense_lncRNA
381	MSTRG.139438.1	anti-sense_lncRNA
382	MSTRG.54139.12	anti-sense_lncRNA
383	MSTRG.64137.1	anti-sense_lncRNA
384	MSTRG.132748.2	anti-sense_lncRNA
385	MSTRG.6327.1	anti-sense_lncRNA
386	MSTRG.121644.1	anti-sense_lncRNA
387	MSTRG.126730.2	anti-sense_lncRNA
388	MSTRG.133019.1	anti-sense_lncRNA
389	MSTRG.98998.1	anti-sense_lncRNA
390	MSTRG.15638.1	anti-sense_lncRNA
391	MSTRG.33212.19	anti-sense_lncRNA
392	MSTRG.103661.3	anti-sense_lncRNA
393	MSTRG.35007.4	anti-sense_lncRNA
394	MSTRG.85431.1	anti-sense_lncRNA
395	MSTRG.102295.1	anti-sense_lncRNA
396	MSTRG.127508.1	anti-sense_lncRNA
397	MSTRG.100183.3	anti-sense_lncRNA
398	MSTRG.70150.2	anti-sense_lncRNA
399	MSTRG.46036.1	anti-sense_lncRNA
400	MSTRG.28360.2	anti-sense_lncRNA
401	MSTRG.92647.1	anti-sense_lncRNA
402	MSTRG.34704.1	anti-sense_lncRNA
403	MSTRG.4336.1	anti-sense_lncRNA
404	MSTRG.60232.1	anti-sense_lncRNA
405	MSTRG.78011.1	anti-sense_lncRNA
406	MSTRG.53943.1	anti-sense_lncRNA
407	MSTRG.31873.6	anti-sense_lncRNA
408	MSTRG.3925.2	anti-sense_lncRNA
409	MSTRG.103048.1	anti-sense_lncRNA
410	MSTRG.85951.1	anti-sense_lncRNA
411	MSTRG.106411.1	anti-sense_lncRNA
412	MSTRG.93932.2	anti-sense_lncRNA
413	MSTRG.113132.1	anti-sense_lncRNA
414	MSTRG.11457.2	anti-sense_lncRNA
415	MSTRG.140332.1	anti-sense_lncRNA
416	MSTRG.4770.1	anti-sense_lncRNA
417	MSTRG.47600.2	anti-sense_lncRNA
418	MSTRG.101759.1	anti-sense_lncRNA
419	MSTRG.42932.4	anti-sense_lncRNA
420	MSTRG.120237.7	anti-sense_lncRNA
421	MSTRG.33212.4	anti-sense_lncRNA
422	MSTRG.33212.1	anti-sense_lncRNA
423	MSTRG.72134.10	anti-sense_lncRNA
424	MSTRG.99188.2	anti-sense_lncRNA
425	MSTRG.31205.3	anti-sense_lncRNA
426	MSTRG.139207.3	anti-sense_lncRNA
427	MSTRG.59035.1	anti-sense_lncRNA
428	MSTRG.25571.1	anti-sense_lncRNA
429	MSTRG.69647.1	anti-sense_lncRNA
430	MSTRG.46998.2	anti-sense_lncRNA
431	MSTRG.139189.1	anti-sense_lncRNA
432	MSTRG.73966.22	anti-sense_lncRNA
433	MSTRG.34566.1	anti-sense_lncRNA
434	MSTRG.94430.1	anti-sense_lncRNA
435	MSTRG.133216.1	anti-sense_lncRNA
436	MSTRG.21207.1	anti-sense_lncRNA
437	MSTRG.130649.1	anti-sense_lncRNA
438	MSTRG.108834.3	anti-sense_lncRNA
439	MSTRG.37925.1	anti-sense_lncRNA
440	MSTRG.73089.2	anti-sense_lncRNA
441	MSTRG.138065.1	anti-sense_lncRNA
442	MSTRG.70735.1	anti-sense_lncRNA
443	MSTRG.115554.3	anti-sense_lncRNA
444	MSTRG.73966.4	anti-sense_lncRNA
445	MSTRG.105536.2	anti-sense_lncRNA
446	MSTRG.93246.1	anti-sense_lncRNA
447	MSTRG.106747.1	anti-sense_lncRNA
448	MSTRG.78569.1	anti-sense_lncRNA
449	MSTRG.54608.1	anti-sense_lncRNA
450	MSTRG.122276.2	anti-sense_lncRNA
451	MSTRG.8591.1	anti-sense_lncRNA
452	MSTRG.101852.1	anti-sense_lncRNA
453	MSTRG.146205.1	anti-sense_lncRNA
454	MSTRG.120967.2	anti-sense_lncRNA
455	MSTRG.129130.1	anti-sense_lncRNA
456	MSTRG.33212.10	anti-sense_lncRNA
457	MSTRG.56880.3	anti-sense_lncRNA
458	MSTRG.5843.1	anti-sense_lncRNA
459	MSTRG.54996.4	anti-sense_lncRNA
460	MSTRG.68498.1	anti-sense_lncRNA
461	MSTRG.73966.9	anti-sense_lncRNA
462	MSTRG.27105.17	anti-sense_lncRNA
463	MSTRG.145608.1	anti-sense_lncRNA
464	MSTRG.129566.2	anti-sense_lncRNA
465	MSTRG.97313.7	anti-sense_lncRNA
466	MSTRG.103661.2	anti-sense_lncRNA
467	MSTRG.76907.2	anti-sense_lncRNA
468	MSTRG.72131.1	anti-sense_lncRNA
469	MSTRG.139233.1	anti-sense_lncRNA
470	MSTRG.103661.4	anti-sense_lncRNA
471	MSTRG.23451.1	anti-sense_lncRNA
472	MSTRG.106053.3	anti-sense_lncRNA
473	MSTRG.55273.1	anti-sense_lncRNA
474	MSTRG.58528.1	anti-sense_lncRNA
475	MSTRG.18339.1	anti-sense_lncRNA
476	MSTRG.64137.2	anti-sense_lncRNA
477	MSTRG.58133.2	anti-sense_lncRNA
478	MSTRG.69550.2	anti-sense_lncRNA
479	MSTRG.58133.1	anti-sense_lncRNA
480	MSTRG.121488.1	anti-sense_lncRNA
481	MSTRG.89750.4	anti-sense_lncRNA
482	MSTRG.58133.4	anti-sense_lncRNA
483	MSTRG.88511.2	anti-sense_lncRNA
484	MSTRG.128917.2	anti-sense_lncRNA
485	MSTRG.60902.1	anti-sense_lncRNA
486	MSTRG.40124.1	anti-sense_lncRNA
487	MSTRG.16685.1	anti-sense_lncRNA
488	MSTRG.141314.2	anti-sense_lncRNA
489	MSTRG.9326.1	anti-sense_lncRNA
490	MSTRG.90569.1	anti-sense_lncRNA
491	MSTRG.27877.1	anti-sense_lncRNA
492	MSTRG.139203.1	anti-sense_lncRNA
493	MSTRG.91834.2	anti-sense_lncRNA
494	MSTRG.145618.1	anti-sense_lncRNA
495	MSTRG.24962.2	anti-sense_lncRNA
496	MSTRG.76048.1	anti-sense_lncRNA
497	MSTRG.4020.2	anti-sense_lncRNA
498	MSTRG.121038.1	anti-sense_lncRNA
499	MSTRG.22704.1	anti-sense_lncRNA
500	MSTRG.126741.1	anti-sense_lncRNA
501	MSTRG.7011.1	anti-sense_lncRNA
502	MSTRG.141314.18	anti-sense_lncRNA
503	MSTRG.24401.1	anti-sense_lncRNA
504	MSTRG.65145.1	anti-sense_lncRNA
505	MSTRG.54487.1	anti-sense_lncRNA
506	MSTRG.47637.1	anti-sense_lncRNA
507	MSTRG.15529.2	anti-sense_lncRNA
508	MSTRG.31293.1	anti-sense_lncRNA
509	MSTRG.131003.1	anti-sense_lncRNA
510	MSTRG.56880.1	anti-sense_lncRNA
511	MSTRG.45940.2	anti-sense_lncRNA
512	MSTRG.97601.3	anti-sense_lncRNA
513	MSTRG.36358.2	anti-sense_lncRNA
514	MSTRG.71719.1	anti-sense_lncRNA
515	MSTRG.77996.2	anti-sense_lncRNA
516	MSTRG.89653.4	anti-sense_lncRNA
517	MSTRG.126613.1	anti-sense_lncRNA
518	MSTRG.134848.1	anti-sense_lncRNA
519	MSTRG.6001.1	anti-sense_lncRNA
520	MSTRG.52131.1	anti-sense_lncRNA
521	MSTRG.120548.2	anti-sense_lncRNA
522	MSTRG.99050.26	anti-sense_lncRNA
523	MSTRG.42453.1	anti-sense_lncRNA
524	MSTRG.87448.2	anti-sense_lncRNA
525	MSTRG.59556.1	anti-sense_lncRNA
526	MSTRG.142733.2	anti-sense_lncRNA
527	MSTRG.127322.5	anti-sense_lncRNA
528	MSTRG.25255.3	anti-sense_lncRNA
529	MSTRG.134325.2	anti-sense_lncRNA
530	MSTRG.22596.2	anti-sense_lncRNA
531	MSTRG.27434.3	anti-sense_lncRNA
532	MSTRG.71979.1	anti-sense_lncRNA
533	MSTRG.60136.1	anti-sense_lncRNA
534	MSTRG.141314.35	anti-sense_lncRNA
535	MSTRG.18182.1	anti-sense_lncRNA
536	MSTRG.138092.1	anti-sense_lncRNA
537	MSTRG.113776.1	anti-sense_lncRNA
538	MSTRG.54087.1	anti-sense_lncRNA
539	MSTRG.132024.1	anti-sense_lncRNA
540	MSTRG.99188.3	anti-sense_lncRNA
541	MSTRG.46113.1	anti-sense_lncRNA
542	MSTRG.15845.1	anti-sense_lncRNA
543	MSTRG.67727.9	anti-sense_lncRNA
544	MSTRG.29994.1	anti-sense_lncRNA
545	MSTRG.85850.2	anti-sense_lncRNA
546	MSTRG.4727.1	anti-sense_lncRNA
547	MSTRG.15529.1	anti-sense_lncRNA
548	MSTRG.528.1	anti-sense_lncRNA
549	MSTRG.25255.2	anti-sense_lncRNA
550	MSTRG.64633.1	anti-sense_lncRNA
551	MSTRG.35007.1	anti-sense_lncRNA
552	MSTRG.5350.1	anti-sense_lncRNA
553	MSTRG.55150.1	anti-sense_lncRNA
554	MSTRG.33212.17	anti-sense_lncRNA
555	MSTRG.14989.50	anti-sense_lncRNA
556	MSTRG.44293.1	anti-sense_lncRNA
557	MSTRG.109906.1	anti-sense_lncRNA
558	MSTRG.124257.1	anti-sense_lncRNA
559	MSTRG.62287.1	anti-sense_lncRNA
560	MSTRG.41476.1	anti-sense_lncRNA
561	MSTRG.54918.2	anti-sense_lncRNA
562	MSTRG.15520.1	anti-sense_lncRNA
563	MSTRG.61668.1	anti-sense_lncRNA
564	MSTRG.10556.1	anti-sense_lncRNA
565	MSTRG.76485.1	anti-sense_lncRNA
566	MSTRG.58750.1	anti-sense_lncRNA
567	MSTRG.134495.1	anti-sense_lncRNA
568	MSTRG.86608.1	anti-sense_lncRNA
569	MSTRG.146176.2	anti-sense_lncRNA
570	MSTRG.36988.1	anti-sense_lncRNA
571	MSTRG.99188.4	anti-sense_lncRNA
572	MSTRG.81678.1	anti-sense_lncRNA
573	MSTRG.72135.3	anti-sense_lncRNA
574	MSTRG.16652.1	anti-sense_lncRNA
575	MSTRG.22595.1	anti-sense_lncRNA
576	MSTRG.139207.1	anti-sense_lncRNA
577	MSTRG.20511.1	anti-sense_lncRNA
578	MSTRG.111903.1	anti-sense_lncRNA
579	MSTRG.73966.5	anti-sense_lncRNA
580	MSTRG.97666.1	anti-sense_lncRNA
581	MSTRG.122669.1	anti-sense_lncRNA
582	MSTRG.43130.1	anti-sense_lncRNA
583	MSTRG.13233.1	anti-sense_lncRNA
584	MSTRG.12216.2	anti-sense_lncRNA
585	MSTRG.90581.10	anti-sense_lncRNA
586	MSTRG.53838.2	anti-sense_lncRNA
587	MSTRG.108834.2	anti-sense_lncRNA
588	MSTRG.80286.1	anti-sense_lncRNA
589	MSTRG.58133.3	anti-sense_lncRNA
590	MSTRG.111101.1	anti-sense_lncRNA
591	MSTRG.22594.136	anti-sense_lncRNA
592	MSTRG.96514.1	anti-sense_lncRNA
593	MSTRG.6590.1	anti-sense_lncRNA
594	MSTRG.135166.1	anti-sense_lncRNA
595	MSTRG.46903.2	anti-sense_lncRNA
596	MSTRG.56880.2	anti-sense_lncRNA
597	MSTRG.98096.1	anti-sense_lncRNA
598	MSTRG.9118.2	anti-sense_lncRNA
599	MSTRG.91765.3	anti-sense_lncRNA
600	MSTRG.72135.1	anti-sense_lncRNA
601	MSTRG.144588.1	anti-sense_lncRNA
602	MSTRG.138831.1	anti-sense_lncRNA
603	MSTRG.97601.5	anti-sense_lncRNA
604	MSTRG.129419.1	anti-sense_lncRNA
605	MSTRG.75026.1	anti-sense_lncRNA
606	MSTRG.129416.1	anti-sense_lncRNA
607	MSTRG.50397.2	anti-sense_lncRNA
608	MSTRG.29394.1	anti-sense_lncRNA
609	MSTRG.74350.1	anti-sense_lncRNA
610	MSTRG.46046.1	anti-sense_lncRNA
611	MSTRG.26576.1	anti-sense_lncRNA
612	MSTRG.128787.8	anti-sense_lncRNA
613	MSTRG.68960.1	anti-sense_lncRNA
614	MSTRG.104665.1	anti-sense_lncRNA
615	MSTRG.57939.1	anti-sense_lncRNA
616	MSTRG.69550.3	anti-sense_lncRNA
617	MSTRG.9118.3	anti-sense_lncRNA
618	MSTRG.110900.1	anti-sense_lncRNA
619	MSTRG.52008.1	anti-sense_lncRNA
620	MSTRG.143305.1	anti-sense_lncRNA
621	MSTRG.134237.1	anti-sense_lncRNA
622	MSTRG.8754.1	anti-sense_lncRNA
623	MSTRG.112897.3	anti-sense_lncRNA
624	MSTRG.131890.2	anti-sense_lncRNA
625	MSTRG.110083.1	anti-sense_lncRNA
626	MSTRG.15288.1	anti-sense_lncRNA
627	MSTRG.109280.1	anti-sense_lncRNA
628	MSTRG.4020.3	anti-sense_lncRNA
629	MSTRG.9638.1	anti-sense_lncRNA
630	MSTRG.70206.1	anti-sense_lncRNA
631	MSTRG.15824.1	anti-sense_lncRNA
632	MSTRG.43778.3	anti-sense_lncRNA
633	MSTRG.146054.5	anti-sense_lncRNA
634	MSTRG.28838.1	anti-sense_lncRNA
635	MSTRG.115204.1	anti-sense_lncRNA
636	MSTRG.71549.1	anti-sense_lncRNA
637	MSTRG.82082.1	anti-sense_lncRNA
638	MSTRG.31453.1	anti-sense_lncRNA
639	MSTRG.15170.1	anti-sense_lncRNA
640	MSTRG.68496.2	anti-sense_lncRNA
641	MSTRG.97326.1	anti-sense_lncRNA
642	MSTRG.22594.135	anti-sense_lncRNA
643	MSTRG.71910.3	anti-sense_lncRNA
644	MSTRG.21806.2	anti-sense_lncRNA
645	MSTRG.15844.1	anti-sense_lncRNA
646	MSTRG.141314.26	anti-sense_lncRNA
647	MSTRG.139590.3	anti-sense_lncRNA
648	MSTRG.86793.5	anti-sense_lncRNA
649	MSTRG.142733.1	anti-sense_lncRNA
650	MSTRG.5007.1	anti-sense_lncRNA
651	MSTRG.142071.2	anti-sense_lncRNA
652	MSTRG.32552.1	anti-sense_lncRNA
653	MSTRG.40777.1	anti-sense_lncRNA
654	MSTRG.25510.1	anti-sense_lncRNA
655	MSTRG.69562.2	anti-sense_lncRNA
656	MSTRG.85585.1	anti-sense_lncRNA
657	MSTRG.99539.1	anti-sense_lncRNA
658	MSTRG.7808.1	anti-sense_lncRNA
659	MSTRG.100010.1	anti-sense_lncRNA
660	MSTRG.51531.1	anti-sense_lncRNA
661	MSTRG.67727.15	anti-sense_lncRNA
662	MSTRG.71427.1	anti-sense_lncRNA
663	MSTRG.68108.1	anti-sense_lncRNA
664	MSTRG.51369.1	anti-sense_lncRNA
665	MSTRG.138602.3	anti-sense_lncRNA
666	MSTRG.145999.3	anti-sense_lncRNA
667	MSTRG.92978.1	anti-sense_lncRNA
668	MSTRG.61877.1	anti-sense_lncRNA
669	MSTRG.14670.1	anti-sense_lncRNA
670	MSTRG.73966.2	anti-sense_lncRNA
671	MSTRG.90935.1	anti-sense_lncRNA
672	MSTRG.142071.1	anti-sense_lncRNA
673	MSTRG.32074.1	anti-sense_lncRNA
674	MSTRG.14989.51	anti-sense_lncRNA
675	MSTRG.62924.2	anti-sense_lncRNA
676	MSTRG.11520.2	anti-sense_lncRNA
677	MSTRG.128985.2	anti-sense_lncRNA
678	MSTRG.82446.2	anti-sense_lncRNA
679	MSTRG.32552.5	anti-sense_lncRNA
680	MSTRG.41368.1	anti-sense_lncRNA
681	MSTRG.65769.1	anti-sense_lncRNA
682	MSTRG.13464.1	anti-sense_lncRNA
683	MSTRG.96721.1	anti-sense_lncRNA
684	MSTRG.36559.1	anti-sense_lncRNA
685	MSTRG.9562.1	anti-sense_lncRNA
686	MSTRG.20521.2	anti-sense_lncRNA
687	MSTRG.131452.5	anti-sense_lncRNA
688	MSTRG.33725.1	anti-sense_lncRNA
689	MSTRG.139383.8	anti-sense_lncRNA
690	MSTRG.14286.2	anti-sense_lncRNA
691	MSTRG.32552.7	anti-sense_lncRNA
692	MSTRG.54330.50	anti-sense_lncRNA
693	MSTRG.32552.2	anti-sense_lncRNA
694	MSTRG.42991.1	anti-sense_lncRNA
695	MSTRG.38589.1	anti-sense_lncRNA
696	MSTRG.54996.1	anti-sense_lncRNA
697	MSTRG.101148.2	anti-sense_lncRNA
698	MSTRG.92953.1	anti-sense_lncRNA
699	MSTRG.114585.3	anti-sense_lncRNA
700	MSTRG.21067.1	anti-sense_lncRNA
701	MSTRG.99563.1	anti-sense_lncRNA
702	MSTRG.28953.1	anti-sense_lncRNA
703	MSTRG.89375.1	anti-sense_lncRNA
704	MSTRG.67727.8	anti-sense_lncRNA
705	MSTRG.71879.1	anti-sense_lncRNA
706	MSTRG.20187.1	anti-sense_lncRNA
707	MSTRG.86524.1	anti-sense_lncRNA
708	MSTRG.26203.6	anti-sense_lncRNA
709	MSTRG.140705.1	anti-sense_lncRNA
710	MSTRG.119795.1	anti-sense_lncRNA
711	MSTRG.28710.1	anti-sense_lncRNA
712	MSTRG.42379.1	anti-sense_lncRNA
713	MSTRG.104792.1	anti-sense_lncRNA
714	MSTRG.21459.2	anti-sense_lncRNA
715	MSTRG.105113.1	anti-sense_lncRNA
716	MSTRG.102080.1	anti-sense_lncRNA
717	MSTRG.47600.1	anti-sense_lncRNA
718	MSTRG.84329.1	anti-sense_lncRNA
719	MSTRG.20521.3	anti-sense_lncRNA
720	MSTRG.16268.1	anti-sense_lncRNA
721	MSTRG.141314.27	anti-sense_lncRNA
722	MSTRG.58483.1	anti-sense_lncRNA
723	MSTRG.7062.8	anti-sense_lncRNA
724	MSTRG.37888.3	anti-sense_lncRNA
725	MSTRG.139383.17	anti-sense_lncRNA
726	MSTRG.124702.2	anti-sense_lncRNA
727	MSTRG.112041.1	anti-sense_lncRNA
728	MSTRG.126730.1	anti-sense_lncRNA
729	MSTRG.36245.2	anti-sense_lncRNA
730	MSTRG.34669.1	anti-sense_lncRNA
731	MSTRG.72635.1	anti-sense_lncRNA
732	MSTRG.27007.2	intronic_lncRNA
733	MSTRG.8619.1	intronic_lncRNA
734	MSTRG.41054.1	intronic_lncRNA
735	MSTRG.145097.2	intronic_lncRNA
736	MSTRG.106368.1	intronic_lncRNA
737	MSTRG.27007.7	intronic_lncRNA
738	MSTRG.84090.4	intronic_lncRNA
739	MSTRG.81868.22	intronic_lncRNA
740	MSTRG.11291.2	intronic_lncRNA
741	MSTRG.64771.3	intronic_lncRNA
742	MSTRG.112941.1	intronic_lncRNA
743	MSTRG.45950.1	intronic_lncRNA
744	MSTRG.76482.51	intronic_lncRNA
745	MSTRG.51976.2	intronic_lncRNA
746	MSTRG.17232.2	intronic_lncRNA
747	MSTRG.108319.1	intronic_lncRNA
748	MSTRG.78266.1	intronic_lncRNA
749	MSTRG.7619.1	intronic_lncRNA
750	MSTRG.129582.1	intronic_lncRNA
751	MSTRG.69550.4	intronic_lncRNA
752	MSTRG.119516.2	intronic_lncRNA
753	MSTRG.36071.1	intronic_lncRNA
754	MSTRG.145097.1	intronic_lncRNA
755	MSTRG.47973.4	intronic_lncRNA
756	MSTRG.44735.2	intronic_lncRNA
757	MSTRG.69042.1	intronic_lncRNA
758	MSTRG.11331.2	intronic_lncRNA
759	MSTRG.69546.5	intronic_lncRNA
760	MSTRG.44714.1	intronic_lncRNA
761	MSTRG.128092.1	intronic_lncRNA
762	MSTRG.41053.2	intronic_lncRNA
763	MSTRG.96387.1	intronic_lncRNA
764	MSTRG.102542.25	intronic_lncRNA
765	MSTRG.17352.1	intronic_lncRNA
766	MSTRG.58200.52	intronic_lncRNA
767	MSTRG.70986.1	intronic_lncRNA
768	MSTRG.77958.1	intronic_lncRNA
769	MSTRG.89318.2	intronic_lncRNA
770	MSTRG.115247.30	intronic_lncRNA
771	MSTRG.70319.11	intronic_lncRNA
772	MSTRG.15520.2	intronic_lncRNA
773	MSTRG.67144.2	intronic_lncRNA
774	MSTRG.23097.1	intronic_lncRNA
775	MSTRG.78930.1	intronic_lncRNA
776	MSTRG.78252.1	intronic_lncRNA
777	MSTRG.142081.1	intronic_lncRNA
778	MSTRG.128787.20	intronic_lncRNA
779	MSTRG.55536.1	intronic_lncRNA
780	MSTRG.98296.1	intronic_lncRNA
781	MSTRG.18945.1	intronic_lncRNA
782	MSTRG.47973.3	intronic_lncRNA
783	MSTRG.59002.3	intronic_lncRNA
784	MSTRG.74699.1	intronic_lncRNA
785	MSTRG.6001.2	intronic_lncRNA
786	MSTRG.115793.1	intronic_lncRNA
787	MSTRG.25213.2	intronic_lncRNA
788	MSTRG.77267.1	intronic_lncRNA
789	MSTRG.98513.17	intronic_lncRNA
790	MSTRG.91041.3	intronic_lncRNA
791	MSTRG.8604.1	intronic_lncRNA
792	MSTRG.136343.2	intronic_lncRNA
793	MSTRG.124606.1	intronic_lncRNA
794	MSTRG.17232.1	intronic_lncRNA
795	MSTRG.96104.1	intronic_lncRNA
796	MSTRG.120125.4	intronic_lncRNA
797	MSTRG.97157.1	intronic_lncRNA
798	MSTRG.114183.2	intronic_lncRNA
799	MSTRG.81189.1	intronic_lncRNA
800	MSTRG.128252.1	intronic_lncRNA
801	MSTRG.5380.1	intronic_lncRNA
802	MSTRG.102542.23	intronic_lncRNA
803	MSTRG.69961.1	intronic_lncRNA
804	MSTRG.111149.4	intronic_lncRNA
805	MSTRG.98007.1	intronic_lncRNA
806	MSTRG.50383.2	intronic_lncRNA
807	MSTRG.12387.1	intronic_lncRNA
808	MSTRG.133465.3	intronic_lncRNA
809	MSTRG.94352.1	intronic_lncRNA
810	MSTRG.131697.3	intronic_lncRNA
811	MSTRG.137693.1	intronic_lncRNA
812	MSTRG.81277.2	intronic_lncRNA
813	MSTRG.70570.1	intronic_lncRNA
814	MSTRG.111853.2	intronic_lncRNA
815	MSTRG.102534.1	intronic_lncRNA
816	MSTRG.93829.1	intronic_lncRNA
817	MSTRG.19617.2	intronic_lncRNA
818	MSTRG.22493.2	intronic_lncRNA
819	MSTRG.3049.2	intronic_lncRNA
820	MSTRG.6154.2	intronic_lncRNA
821	MSTRG.97673.1	intronic_lncRNA
822	MSTRG.136058.1	intronic_lncRNA
823	MSTRG.19213.2	intronic_lncRNA
824	MSTRG.106507.2	intronic_lncRNA
825	MSTRG.137267.3	intronic_lncRNA
826	MSTRG.127049.1	intronic_lncRNA
827	MSTRG.140769.1	intronic_lncRNA
828	MSTRG.30381.1	intronic_lncRNA
829	MSTRG.62173.1	intronic_lncRNA
830	MSTRG.31871.11	intronic_lncRNA
831	MSTRG.130803.2	intronic_lncRNA
832	MSTRG.19939.1	intronic_lncRNA
833	MSTRG.64544.1	intronic_lncRNA
834	MSTRG.13404.2	intronic_lncRNA
835	MSTRG.31243.2	intronic_lncRNA
836	MSTRG.9511.1	intronic_lncRNA
837	MSTRG.46010.8	intronic_lncRNA
838	MSTRG.134505.1	intronic_lncRNA
839	MSTRG.41053.1	intronic_lncRNA
840	MSTRG.129108.4	intronic_lncRNA
841	MSTRG.61812.1	intronic_lncRNA
842	MSTRG.30380.2	intronic_lncRNA
843	MSTRG.55499.1	intronic_lncRNA
844	MSTRG.32217.2	intronic_lncRNA
845	MSTRG.44735.1	intronic_lncRNA
846	MSTRG.8131.1	intronic_lncRNA
847	MSTRG.9474.1	intronic_lncRNA
848	MSTRG.86099.1	intronic_lncRNA
849	MSTRG.114916.2	intronic_lncRNA
850	MSTRG.45148.1	intronic_lncRNA
851	MSTRG.28555.1	intronic_lncRNA
852	MSTRG.6154.1	intronic_lncRNA
853	MSTRG.64896.23	intronic_lncRNA
854	MSTRG.52108.1	intronic_lncRNA
855	MSTRG.16435.2	intronic_lncRNA
856	MSTRG.48056.1	intronic_lncRNA
857	MSTRG.4779.1	intronic_lncRNA
858	MSTRG.68397.1	intronic_lncRNA
859	MSTRG.60523.1	intronic_lncRNA
860	MSTRG.52077.1	intronic_lncRNA
861	MSTRG.92206.1	intronic_lncRNA
862	MSTRG.107382.1	intronic_lncRNA
863	MSTRG.91041.2	intronic_lncRNA
864	MSTRG.13668.2	intronic_lncRNA
865	MSTRG.23564.1	intronic_lncRNA
866	MSTRG.17016.7	intronic_lncRNA
867	MSTRG.136757.1	intronic_lncRNA
868	MSTRG.66972.1	intronic_lncRNA
869	MSTRG.45228.1	intronic_lncRNA
870	MSTRG.101038.1	intronic_lncRNA
871	MSTRG.85484.28	intronic_lncRNA
872	MSTRG.27007.5	intronic_lncRNA
873	MSTRG.13668.3	intronic_lncRNA
874	MSTRG.29252.1	intronic_lncRNA
875	MSTRG.145926.1	intronic_lncRNA
876	MSTRG.15009.1	intronic_lncRNA
877	MSTRG.66972.2	intronic_lncRNA
878	MSTRG.25213.1	intronic_lncRNA
879	MSTRG.78824.10	intronic_lncRNA
880	MSTRG.34045.1	intronic_lncRNA
881	MSTRG.285.2	intronic_lncRNA
882	MSTRG.34332.1	intronic_lncRNA
883	MSTRG.67997.5	intronic_lncRNA
884	MSTRG.77952.13	intronic_lncRNA
885	MSTRG.73966.7	intronic_lncRNA
886	MSTRG.96176.1	intronic_lncRNA
887	MSTRG.27007.6	intronic_lncRNA
888	MSTRG.32907.1	intronic_lncRNA
889	MSTRG.22192.1	intronic_lncRNA
890	MSTRG.45256.1	intronic_lncRNA
891	MSTRG.88853.1	intronic_lncRNA
892	MSTRG.67854.1	intronic_lncRNA
893	MSTRG.9195.1	intronic_lncRNA
894	MSTRG.131974.1	intronic_lncRNA
895	MSTRG.18644.55	intronic_lncRNA
896	MSTRG.45393.1	intronic_lncRNA
897	MSTRG.100120.1	intronic_lncRNA
898	MSTRG.13413.10	intronic_lncRNA
899	MSTRG.143264.2	intronic_lncRNA
900	MSTRG.58203.1	intronic_lncRNA
901	MSTRG.24559.1	intronic_lncRNA
902	MSTRG.49009.1	intronic_lncRNA
903	MSTRG.67853.1	intronic_lncRNA
904	MSTRG.59355.1	intronic_lncRNA
905	MSTRG.55327.3	intronic_lncRNA
906	MSTRG.55382.1	intronic_lncRNA
907	MSTRG.124998.1	intronic_lncRNA
908	MSTRG.69550.6	intronic_lncRNA
909	MSTRG.96210.1	intronic_lncRNA
910	MSTRG.112419.1	intronic_lncRNA
911	MSTRG.119514.20	intronic_lncRNA
912	MSTRG.85982.1	intronic_lncRNA
913	MSTRG.39168.1	intronic_lncRNA
914	MSTRG.96598.1	intronic_lncRNA
915	MSTRG.129108.3	intronic_lncRNA
916	MSTRG.15086.1	intronic_lncRNA
917	MSTRG.80828.1	intronic_lncRNA
918	MSTRG.13313.12	intronic_lncRNA
919	MSTRG.69645.1	intronic_lncRNA
920	MSTRG.67997.4	intronic_lncRNA
921	MSTRG.35906.1	intronic_lncRNA
922	MSTRG.3812.1	intronic_lncRNA
923	MSTRG.15220.1	intronic_lncRNA
924	MSTRG.47427.18	intronic_lncRNA
925	MSTRG.51929.1	intronic_lncRNA
926	MSTRG.66972.3	intronic_lncRNA
927	MSTRG.15164.1	intronic_lncRNA
928	MSTRG.3049.3	intronic_lncRNA
929	MSTRG.68823.1	intronic_lncRNA
930	MSTRG.141759.1	intronic_lncRNA
931	MSTRG.129401.1	intronic_lncRNA
932	MSTRG.38084.1	intronic_lncRNA
933	MSTRG.108042.2	intronic_lncRNA
934	MSTRG.114913.3	intronic_lncRNA
935	MSTRG.74700.1	intronic_lncRNA
936	MSTRG.128787.12	intronic_lncRNA
937	MSTRG.103511.1	intronic_lncRNA
938	MSTRG.55381.1	intronic_lncRNA
939	MSTRG.15989.6	intronic_lncRNA
940	MSTRG.259.1	intronic_lncRNA
941	MSTRG.68735.2	intronic_lncRNA
942	MSTRG.39169.1	intronic_lncRNA
943	MSTRG.18284.1	intronic_lncRNA
944	MSTRG.19851.1	intronic_lncRNA
945	MSTRG.21674.1	intronic_lncRNA
946	MSTRG.88097.1	intronic_lncRNA
947	MSTRG.55349.29	intronic_lncRNA
948	MSTRG.55151.1	intronic_lncRNA
949	MSTRG.123784.1	intronic_lncRNA
950	MSTRG.12075.1	intronic_lncRNA
951	MSTRG.32907.2	intronic_lncRNA
952	MSTRG.97154.1	intronic_lncRNA
953	MSTRG.104651.1	intronic_lncRNA
954	MSTRG.28865.1	intronic_lncRNA
955	MSTRG.59846.1	intronic_lncRNA
956	MSTRG.142917.9	intronic_lncRNA
957	MSTRG.58149.1	intronic_lncRNA
958	MSTRG.13413.9	intronic_lncRNA
959	MSTRG.79795.3	intronic_lncRNA
960	MSTRG.68334.1	intronic_lncRNA
961	MSTRG.114787.1	intronic_lncRNA
962	MSTRG.130803.1	intronic_lncRNA
963	MSTRG.33280.1	intronic_lncRNA
964	MSTRG.129108.1	intronic_lncRNA
965	MSTRG.67853.2	intronic_lncRNA
966	MSTRG.66972.4	intronic_lncRNA
967	MSTRG.29544.12	intronic_lncRNA
968	MSTRG.70554.1	intronic_lncRNA
969	MSTRG.65266.9	intronic_lncRNA
970	MSTRG.27007.1	intronic_lncRNA
971	MSTRG.108959.1	intronic_lncRNA
972	MSTRG.33195.7	intronic_lncRNA
973	MSTRG.146543.1	intronic_lncRNA
974	MSTRG.137674.35	intronic_lncRNA
975	MSTRG.69852.1	intronic_lncRNA
976	MSTRG.59369.14	intronic_lncRNA
977	MSTRG.23748.2	intronic_lncRNA
978	MSTRG.144175.3	intronic_lncRNA
979	MSTRG.126626.1	intronic_lncRNA
980	MSTRG.16158.2	intronic_lncRNA
981	MSTRG.97292.1	intronic_lncRNA
982	MSTRG.9063.2	intronic_lncRNA
983	MSTRG.49609.1	intronic_lncRNA
984	MSTRG.119806.1	intronic_lncRNA
985	MSTRG.3049.1	intronic_lncRNA
986	MSTRG.2596.1	intronic_lncRNA
987	MSTRG.100804.1	intronic_lncRNA
988	MSTRG.8587.1	intronic_lncRNA
989	MSTRG.112789.1	intronic_lncRNA
990	MSTRG.31443.1	intronic_lncRNA
991	MSTRG.57659.1	intronic_lncRNA
992	MSTRG.27384.1	intronic_lncRNA
993	MSTRG.138117.1	intronic_lncRNA
994	MSTRG.83469.1	intronic_lncRNA
995	MSTRG.14972.72	intronic_lncRNA
996	MSTRG.10630.9	intronic_lncRNA
997	MSTRG.64544.2	intronic_lncRNA
998	MSTRG.129919.1	intronic_lncRNA
999	MSTRG.80526.1	intronic_lncRNA
1000	MSTRG.144142.2	intronic_lncRNA
1001	MSTRG.10630.8	intronic_lncRNA
1002	MSTRG.2142.1	intronic_lncRNA
1003	MSTRG.145916.1	intronic_lncRNA
1004	MSTRG.66998.1	intronic_lncRNA
1005	MSTRG.113118.1	intronic_lncRNA
1006	MSTRG.38227.1	intronic_lncRNA
1007	MSTRG.128800.1	intronic_lncRNA
1008	MSTRG.143649.3	intronic_lncRNA
1009	MSTRG.20372.1	intronic_lncRNA
1010	MSTRG.16158.1	intronic_lncRNA
1011	MSTRG.21461.1	intronic_lncRNA
1012	MSTRG.131697.5	intronic_lncRNA
1013	MSTRG.15638.2	intronic_lncRNA
1014	MSTRG.112342.1	intronic_lncRNA
1015	MSTRG.144175.2	intronic_lncRNA
1016	MSTRG.17016.8	intronic_lncRNA
1017	MSTRG.3631.1	intronic_lncRNA
1018	MSTRG.69550.5	intronic_lncRNA
1019	MSTRG.25956.21	intronic_lncRNA
1020	MSTRG.10593.5	intronic_lncRNA
1021	MSTRG.136343.3	intronic_lncRNA
1022	MSTRG.107791.23	intronic_lncRNA
1023	MSTRG.102542.24	intronic_lncRNA
1024	MSTRG.25541.1	intronic_lncRNA
1025	MSTRG.44373.13	intronic_lncRNA
1026	MSTRG.40462.1	intronic_lncRNA
1027	MSTRG.2740.1	intronic_lncRNA
1028	MSTRG.22742.62	intronic_lncRNA
1029	MSTRG.40536.2	intronic_lncRNA
1030	MSTRG.7779.3	intronic_lncRNA
1031	MSTRG.15809.1	intronic_lncRNA
1032	MSTRG.26627.10	intronic_lncRNA
1033	MSTRG.78505.5	intronic_lncRNA
1034	MSTRG.94395.1	intronic_lncRNA
1035	MSTRG.67566.1	intronic_lncRNA
1036	MSTRG.105264.10	intronic_lncRNA
1037	MSTRG.35244.1	intronic_lncRNA
1038	MSTRG.79022.2	intronic_lncRNA
1039	MSTRG.32482.1	intronic_lncRNA
1040	MSTRG.128360.2	lincRNA
1041	MSTRG.120812.3	lincRNA
1042	MSTRG.130037.4	lincRNA
1043	MSTRG.90826.12	lincRNA
1044	MSTRG.90769.1	lincRNA
1045	MSTRG.2065.1	lincRNA
1046	MSTRG.8508.1	lincRNA
1047	MSTRG.137613.1	lincRNA
1048	MSTRG.57110.1	lincRNA
1049	MSTRG.14989.299	lincRNA
1050	MSTRG.72739.1	lincRNA
1051	MSTRG.76010.2	lincRNA
1052	MSTRG.142745.2	lincRNA
1053	MSTRG.125194.1	lincRNA
1054	MSTRG.99548.14	lincRNA
1055	MSTRG.121963.1	lincRNA
1056	MSTRG.58102.1	lincRNA
1057	MSTRG.49098.1	lincRNA
1058	MSTRG.125376.1	lincRNA
1059	MSTRG.102984.5	lincRNA
1060	MSTRG.39932.5	lincRNA
1061	MSTRG.121262.3	lincRNA
1062	MSTRG.333.1	lincRNA
1063	MSTRG.113182.16	lincRNA
1064	MSTRG.103193.2	lincRNA
1065	MSTRG.9261.1	lincRNA
1066	MSTRG.33387.1	lincRNA
1067	MSTRG.249.3	lincRNA
1068	MSTRG.106519.2	lincRNA
1069	MSTRG.113400.18	lincRNA
1070	MSTRG.47458.2	lincRNA
1071	MSTRG.66257.2	lincRNA
1072	MSTRG.109204.1	lincRNA
1073	MSTRG.69993.1	lincRNA
1074	MSTRG.97448.2	lincRNA
1075	MSTRG.70349.1	lincRNA
1076	MSTRG.14671.1	lincRNA
1077	MSTRG.76656.1	lincRNA
1078	MSTRG.112778.1	lincRNA
1079	MSTRG.60221.2	lincRNA
1080	MSTRG.30065.1	lincRNA
1081	MSTRG.84029.2	lincRNA
1082	MSTRG.122976.1	lincRNA
1083	MSTRG.103506.3	lincRNA
1084	MSTRG.40447.13	lincRNA
1085	MSTRG.24308.1	lincRNA
1086	MSTRG.5048.1	lincRNA
1087	MSTRG.64947.1	lincRNA
1088	MSTRG.21871.1	lincRNA
1089	MSTRG.92404.2	lincRNA
1090	MSTRG.12903.2	lincRNA
1091	MSTRG.64153.1	lincRNA
1092	MSTRG.71278.2	lincRNA
1093	MSTRG.76186.5	lincRNA
1094	MSTRG.24294.4	lincRNA
1095	MSTRG.122972.1	lincRNA
1096	MSTRG.19986.1	lincRNA
1097	MSTRG.67563.1	lincRNA
1098	MSTRG.97838.1	lincRNA
1099	MSTRG.2987.2	lincRNA
1100	MSTRG.50767.1	lincRNA
1101	MSTRG.138476.1	lincRNA
1102	MSTRG.15108.1	lincRNA
1103	MSTRG.34585.1	lincRNA
1104	MSTRG.33326.1	lincRNA
1105	MSTRG.87560.13	lincRNA
1106	MSTRG.116257.1	lincRNA
1107	MSTRG.131035.1	lincRNA
1108	MSTRG.79939.7	lincRNA
1109	MSTRG.71999.3	lincRNA
1110	MSTRG.70276.2	lincRNA
1111	MSTRG.144866.2	lincRNA
1112	MSTRG.60186.1	lincRNA
1113	MSTRG.40658.1	lincRNA
1114	MSTRG.61483.1	lincRNA
1115	MSTRG.796.2	lincRNA
1116	MSTRG.6732.18	lincRNA
1117	MSTRG.110848.4	lincRNA
1118	MSTRG.26862.1	lincRNA
1119	MSTRG.41870.2	lincRNA
1120	MSTRG.105604.2	lincRNA
1121	MSTRG.75362.1	lincRNA
1122	MSTRG.83050.1	lincRNA
1123	MSTRG.57487.1	lincRNA
1124	MSTRG.27171.6	lincRNA
1125	MSTRG.76186.4	lincRNA
1126	MSTRG.79813.1	lincRNA
1127	MSTRG.107865.1	lincRNA
1128	MSTRG.63889.56	lincRNA
1129	MSTRG.34322.1	lincRNA
1130	MSTRG.80253.3	lincRNA
1131	MSTRG.105680.2	lincRNA
1132	MSTRG.22257.2	lincRNA
1133	MSTRG.43480.1	lincRNA
1134	MSTRG.137356.9	lincRNA
1135	MSTRG.141259.2	lincRNA
1136	MSTRG.106502.2	lincRNA
1137	MSTRG.40736.2	lincRNA
1138	MSTRG.95553.2	lincRNA
1139	MSTRG.47510.1	lincRNA
1140	MSTRG.57598.1	lincRNA
1141	MSTRG.755.11	lincRNA
1142	MSTRG.124708.2	lincRNA
1143	MSTRG.76048.3	lincRNA
1144	MSTRG.29666.1	lincRNA
1145	MSTRG.4780.20	lincRNA
1146	MSTRG.55073.5	lincRNA
1147	MSTRG.129419.2	lincRNA
1148	MSTRG.56587.3	lincRNA
1149	MSTRG.139492.1	lincRNA
1150	MSTRG.74403.7	lincRNA
1151	MSTRG.46384.2	lincRNA
1152	MSTRG.37726.1	lincRNA
1153	MSTRG.102439.10	lincRNA
1154	MSTRG.121324.1	lincRNA
1155	MSTRG.105614.1	lincRNA
1156	MSTRG.146627.1	lincRNA
1157	MSTRG.65751.2	lincRNA
1158	MSTRG.10519.2	lincRNA
1159	MSTRG.116547.3	lincRNA
1160	MSTRG.31951.1	lincRNA
1161	MSTRG.104083.1	lincRNA
1162	MSTRG.19451.1	lincRNA
1163	MSTRG.56241.1	lincRNA
1164	MSTRG.29798.1	lincRNA
1165	MSTRG.99153.3	lincRNA
1166	MSTRG.22816.26	lincRNA
1167	MSTRG.108390.1	lincRNA
1168	MSTRG.70838.1	lincRNA
1169	MSTRG.37129.10	lincRNA
1170	MSTRG.145877.1	lincRNA
1171	MSTRG.68316.4	lincRNA
1172	MSTRG.74515.1	lincRNA
1173	MSTRG.58501.2	lincRNA
1174	MSTRG.51285.5	lincRNA
1175	MSTRG.46914.4	lincRNA
1176	MSTRG.40447.17	lincRNA
1177	MSTRG.76605.4	lincRNA
1178	MSTRG.14107.11	lincRNA
1179	MSTRG.121086.7	lincRNA
1180	MSTRG.92827.2	lincRNA
1181	MSTRG.70579.2	lincRNA
1182	MSTRG.135094.1	lincRNA
1183	MSTRG.43210.1	lincRNA
1184	MSTRG.85598.2	lincRNA
1185	MSTRG.138097.1	lincRNA
1186	MSTRG.122308.1	lincRNA
1187	MSTRG.65385.1	lincRNA
1188	MSTRG.46175.3	lincRNA
1189	MSTRG.105510.1	lincRNA
1190	MSTRG.43005.1	lincRNA
1191	MSTRG.20915.1	lincRNA
1192	MSTRG.913.28	lincRNA
1193	MSTRG.40447.19	lincRNA
1194	MSTRG.72684.1	lincRNA
1195	MSTRG.5135.7	lincRNA
1196	MSTRG.104569.1	lincRNA
1197	MSTRG.74943.1	lincRNA
1198	MSTRG.73744.1	lincRNA
1199	MSTRG.145989.1	lincRNA
1200	MSTRG.120454.1	lincRNA
1201	MSTRG.136303.1	lincRNA
1202	MSTRG.34961.1	lincRNA
1203	MSTRG.14762.2	lincRNA
1204	MSTRG.76048.6	lincRNA
1205	MSTRG.60848.1	lincRNA
1206	MSTRG.90221.1	lincRNA
1207	MSTRG.5674.3	lincRNA
1208	MSTRG.1347.1	lincRNA
1209	MSTRG.65032.12	lincRNA
1210	MSTRG.74880.7	lincRNA
1211	MSTRG.110609.1	lincRNA
1212	MSTRG.28579.2	lincRNA
1213	MSTRG.15104.1	lincRNA
1214	MSTRG.4418.4	lincRNA
1215	MSTRG.98164.1	lincRNA
1216	MSTRG.126914.1	lincRNA
1217	MSTRG.78536.1	lincRNA
1218	MSTRG.64447.1	lincRNA
1219	MSTRG.109975.1	lincRNA
1220	MSTRG.77683.20	lincRNA
1221	MSTRG.88686.8	lincRNA
1222	MSTRG.38859.1	lincRNA
1223	MSTRG.82117.7	lincRNA
1224	MSTRG.49850.1	lincRNA
1225	MSTRG.91184.1	lincRNA
1226	MSTRG.134134.1	lincRNA
1227	MSTRG.7855.1	lincRNA
1228	MSTRG.25681.1	lincRNA
1229	MSTRG.78447.1	lincRNA
1230	MSTRG.31230.10	lincRNA
1231	MSTRG.39932.13	lincRNA
1232	MSTRG.5128.1	lincRNA
1233	MSTRG.43102.1	lincRNA
1234	MSTRG.1111.3	lincRNA
1235	MSTRG.29923.16	lincRNA
1236	MSTRG.110144.6	lincRNA
1237	MSTRG.57455.19	lincRNA
1238	MSTRG.59121.5	lincRNA
1239	MSTRG.1615.2	lincRNA
1240	MSTRG.32985.1	lincRNA
1241	MSTRG.5479.4	lincRNA
1242	MSTRG.104221.2	lincRNA
1243	MSTRG.35437.2	lincRNA
1244	MSTRG.132365.2	lincRNA
1245	MSTRG.74797.1	lincRNA
1246	MSTRG.10268.1	lincRNA
1247	MSTRG.128862.3	lincRNA
1248	MSTRG.76348.1	lincRNA
1249	MSTRG.25098.1	lincRNA
1250	MSTRG.101768.1	lincRNA
1251	MSTRG.104381.13	lincRNA
1252	MSTRG.129479.6	lincRNA
1253	MSTRG.77912.1	lincRNA
1254	MSTRG.85787.2	lincRNA
1255	MSTRG.39932.2	lincRNA
1256	MSTRG.33212.11	lincRNA
1257	MSTRG.21761.1	lincRNA
1258	MSTRG.39802.1	lincRNA
1259	MSTRG.17013.1	lincRNA
1260	MSTRG.68495.1	lincRNA
1261	MSTRG.27110.1	lincRNA
1262	MSTRG.113041.7	lincRNA
1263	MSTRG.113041.12	lincRNA
1264	MSTRG.91493.8	lincRNA
1265	MSTRG.61425.3	lincRNA
1266	MSTRG.69604.1	lincRNA
1267	MSTRG.35872.2	lincRNA
1268	MSTRG.5636.1	lincRNA
1269	MSTRG.108898.1	lincRNA
1270	MSTRG.125358.1	lincRNA
1271	MSTRG.142102.6	lincRNA
1272	MSTRG.91264.1	lincRNA
1273	MSTRG.105569.1	lincRNA
1274	MSTRG.44978.1	lincRNA
1275	MSTRG.90357.4	lincRNA
1276	MSTRG.37268.1	lincRNA
1277	MSTRG.73889.2	lincRNA
1278	MSTRG.49356.1	lincRNA
1279	MSTRG.27164.3	lincRNA
1280	MSTRG.122310.1	lincRNA
1281	MSTRG.70477.2	lincRNA
1282	MSTRG.82329.1	lincRNA
1283	MSTRG.36619.2	lincRNA
1284	MSTRG.109525.2	lincRNA
1285	MSTRG.42293.2	lincRNA
1286	MSTRG.9907.4	lincRNA
1287	MSTRG.57902.2	lincRNA
1288	MSTRG.64280.23	lincRNA
1289	MSTRG.45941.1	lincRNA
1290	MSTRG.66832.1	lincRNA
1291	MSTRG.114018.2	lincRNA
1292	MSTRG.103193.3	lincRNA
1293	MSTRG.54083.1	lincRNA
1294	MSTRG.93916.1	lincRNA
1295	MSTRG.65727.1	lincRNA
1296	MSTRG.141293.3	lincRNA
1297	MSTRG.79136.1	lincRNA
1298	MSTRG.4881.2	lincRNA
1299	MSTRG.138506.1	lincRNA
1300	MSTRG.67564.1	lincRNA
1301	MSTRG.32233.1	lincRNA
1302	MSTRG.5410.1	lincRNA
1303	MSTRG.15657.5	lincRNA
1304	MSTRG.35169.2	lincRNA
1305	MSTRG.144050.2	lincRNA
1306	MSTRG.72840.1	lincRNA
1307	MSTRG.129460.12	lincRNA
1308	MSTRG.48319.1	lincRNA
1309	MSTRG.24286.1	lincRNA
1310	MSTRG.143937.5	lincRNA
1311	MSTRG.104381.7	lincRNA
1312	MSTRG.58519.2	lincRNA
1313	MSTRG.86793.1	lincRNA
1314	MSTRG.77724.3	lincRNA
1315	MSTRG.62883.1	lincRNA
1316	MSTRG.52956.1	lincRNA
1317	MSTRG.70800.4	lincRNA
1318	MSTRG.132841.2	lincRNA
1319	MSTRG.72921.1	lincRNA
1320	MSTRG.71314.2	lincRNA
1321	MSTRG.32933.2	lincRNA
1322	MSTRG.66060.1	lincRNA
1323	MSTRG.53628.3	lincRNA
1324	MSTRG.113182.15	lincRNA
1325	MSTRG.38091.1	lincRNA
1326	MSTRG.94328.2	lincRNA
1327	MSTRG.64633.2	lincRNA
1328	MSTRG.85270.1	lincRNA
1329	MSTRG.58616.1	lincRNA
1330	MSTRG.127808.1	lincRNA
1331	MSTRG.39617.2	lincRNA
1332	MSTRG.26264.6	lincRNA
1333	MSTRG.19289.1	lincRNA
1334	MSTRG.99054.1	lincRNA
1335	MSTRG.6943.1	lincRNA
1336	MSTRG.79918.2	lincRNA
1337	MSTRG.91673.23	lincRNA
1338	MSTRG.63900.3	lincRNA
1339	MSTRG.146307.3	lincRNA
1340	MSTRG.51043.2	lincRNA
1341	MSTRG.30678.1	lincRNA
1342	MSTRG.65595.4	lincRNA
1343	MSTRG.142400.4	lincRNA
1344	MSTRG.46305.5	lincRNA
1345	MSTRG.8907.1	lincRNA
1346	MSTRG.28195.6	lincRNA
1347	MSTRG.111078.4	lincRNA
1348	MSTRG.95448.12	lincRNA
1349	MSTRG.60900.26	lincRNA
1350	MSTRG.109032.1	lincRNA
1351	MSTRG.107868.1	lincRNA
1352	MSTRG.69544.1	lincRNA
1353	MSTRG.129149.19	lincRNA
1354	MSTRG.143291.1	lincRNA
1355	MSTRG.6868.1	lincRNA
1356	MSTRG.141870.2	lincRNA
1357	MSTRG.55770.1	lincRNA
1358	MSTRG.125317.1	lincRNA
1359	MSTRG.58333.1	lincRNA
1360	MSTRG.109421.2	lincRNA
1361	MSTRG.21950.2	lincRNA
1362	MSTRG.60881.1	lincRNA
1363	MSTRG.51711.4	lincRNA
1364	MSTRG.22533.1	lincRNA
1365	MSTRG.82231.1	lincRNA
1366	MSTRG.32395.1	lincRNA
1367	MSTRG.135475.1	lincRNA
1368	MSTRG.9914.1	lincRNA
1369	MSTRG.399.1	lincRNA
1370	MSTRG.42293.1	lincRNA
1371	MSTRG.66053.2	lincRNA
1372	MSTRG.42263.1	lincRNA
1373	MSTRG.24359.3	lincRNA
1374	MSTRG.19904.2	lincRNA
1375	MSTRG.69490.3	lincRNA
1376	MSTRG.41870.7	lincRNA
1377	MSTRG.141663.1	lincRNA
1378	MSTRG.144873.17	lincRNA
1379	MSTRG.20218.1	lincRNA
1380	MSTRG.139135.16	lincRNA
1381	MSTRG.39773.3	lincRNA
1382	MSTRG.64990.4	lincRNA
1383	MSTRG.9910.1	lincRNA
1384	MSTRG.127796.1	lincRNA
1385	MSTRG.142102.4	lincRNA
1386	MSTRG.45771.1	lincRNA
1387	MSTRG.146379.1	lincRNA
1388	MSTRG.127279.1	lincRNA
1389	MSTRG.128381.2	lincRNA
1390	MSTRG.913.5	lincRNA
1391	MSTRG.91231.1	lincRNA
1392	MSTRG.58716.4	lincRNA
1393	MSTRG.73192.1	lincRNA
1394	MSTRG.26057.1	lincRNA
1395	MSTRG.8288.31	lincRNA
1396	MSTRG.90490.7	lincRNA
1397	MSTRG.104083.2	lincRNA
1398	MSTRG.3647.1	lincRNA
1399	MSTRG.82221.1	lincRNA
1400	MSTRG.135162.1	lincRNA
1401	MSTRG.41288.5	lincRNA
1402	MSTRG.85975.1	lincRNA
1403	MSTRG.112908.1	lincRNA
1404	MSTRG.140886.13	lincRNA
1405	MSTRG.71189.3	lincRNA
1406	MSTRG.111587.1	lincRNA
1407	MSTRG.20268.2	lincRNA
1408	MSTRG.40742.1	lincRNA
1409	MSTRG.107632.1	lincRNA
1410	MSTRG.129723.6	lincRNA
1411	MSTRG.65941.1	lincRNA
1412	MSTRG.104381.45	lincRNA
1413	MSTRG.34327.1	lincRNA
1414	MSTRG.83988.1	lincRNA
1415	MSTRG.138590.29	lincRNA
1416	MSTRG.28180.1	lincRNA
1417	MSTRG.108062.5	lincRNA
1418	MSTRG.8695.12	lincRNA
1419	MSTRG.62565.1	lincRNA
1420	MSTRG.51711.3	lincRNA
1421	MSTRG.6410.1	lincRNA
1422	MSTRG.120721.1	lincRNA
1423	MSTRG.42902.43	lincRNA
1424	MSTRG.146567.1	lincRNA
1425	MSTRG.44377.4	lincRNA
1426	MSTRG.125696.1	lincRNA
1427	MSTRG.78558.2	lincRNA
1428	MSTRG.74338.1	lincRNA
1429	MSTRG.44926.4	lincRNA
1430	MSTRG.114376.8	lincRNA
1431	MSTRG.2148.3	lincRNA
1432	MSTRG.110261.3	lincRNA
1433	MSTRG.135920.1	lincRNA
1434	MSTRG.76858.1	lincRNA
1435	MSTRG.141911.1	lincRNA
1436	MSTRG.25621.1	lincRNA
1437	MSTRG.139001.1	lincRNA
1438	MSTRG.67512.1	lincRNA
1439	MSTRG.110150.2	lincRNA
1440	MSTRG.144318.1	lincRNA
1441	MSTRG.26200.1	lincRNA
1442	MSTRG.120237.9	lincRNA
1443	MSTRG.30201.2	lincRNA
1444	MSTRG.64769.2	lincRNA
1445	MSTRG.120237.6	lincRNA
1446	MSTRG.65256.1	lincRNA
1447	MSTRG.74139.1	lincRNA
1448	MSTRG.102055.146	lincRNA
1449	MSTRG.22983.1	lincRNA
1450	MSTRG.92134.1	lincRNA
1451	MSTRG.7881.1	lincRNA
1452	MSTRG.83037.1	lincRNA
1453	MSTRG.139860.2	lincRNA
1454	MSTRG.92827.1	lincRNA
1455	MSTRG.56473.3	lincRNA
1456	MSTRG.8700.6	lincRNA
1457	MSTRG.13643.1	lincRNA
1458	MSTRG.16321.1	lincRNA
1459	MSTRG.53376.1	lincRNA
1460	MSTRG.141253.1	lincRNA
1461	MSTRG.135683.4	lincRNA
1462	MSTRG.103008.1	lincRNA
1463	MSTRG.83807.1	lincRNA
1464	MSTRG.132073.1	lincRNA
1465	MSTRG.75757.2	lincRNA
1466	MSTRG.24757.1	lincRNA
1467	MSTRG.14084.1	lincRNA
1468	MSTRG.5128.7	lincRNA
1469	MSTRG.116540.3	lincRNA
1470	MSTRG.140886.1	lincRNA
1471	MSTRG.134534.4	lincRNA
1472	MSTRG.120243.1	lincRNA
1473	MSTRG.113884.1	lincRNA
1474	MSTRG.81314.74	lincRNA
1475	MSTRG.15899.5	lincRNA
1476	MSTRG.120687.3	lincRNA
1477	MSTRG.111788.1	lincRNA
1478	MSTRG.29829.1	lincRNA
1479	MSTRG.40426.1	lincRNA
1480	MSTRG.73274.1	lincRNA
1481	MSTRG.110742.2	lincRNA
1482	MSTRG.85197.10	lincRNA
1483	MSTRG.93001.1	lincRNA
1484	MSTRG.68904.1	lincRNA
1485	MSTRG.27460.1	lincRNA
1486	MSTRG.132205.1	lincRNA
1487	MSTRG.31231.3	lincRNA
1488	MSTRG.137990.1	lincRNA
1489	MSTRG.55038.4	lincRNA
1490	MSTRG.79939.5	lincRNA
1491	MSTRG.77041.7	lincRNA
1492	MSTRG.143116.1	lincRNA
1493	MSTRG.145538.1	lincRNA
1494	MSTRG.88297.42	lincRNA
1495	MSTRG.126407.2	lincRNA
1496	MSTRG.88179.1	lincRNA
1497	MSTRG.64627.2	lincRNA
1498	MSTRG.65728.1	lincRNA
1499	MSTRG.34660.1	lincRNA
1500	MSTRG.132465.16	lincRNA
1501	MSTRG.55038.2	lincRNA
1502	MSTRG.27712.3	lincRNA
1503	MSTRG.91895.1	lincRNA
1504	MSTRG.68210.3	lincRNA
1505	MSTRG.14003.1	lincRNA
1506	MSTRG.43211.1	lincRNA
1507	MSTRG.84832.1	lincRNA
1508	MSTRG.77683.17	lincRNA
1509	MSTRG.45521.1	lincRNA
1510	MSTRG.91377.1	lincRNA
1511	MSTRG.16951.2	lincRNA
1512	MSTRG.17748.1	lincRNA
1513	MSTRG.74339.2	lincRNA
1514	MSTRG.121086.5	lincRNA
1515	MSTRG.99548.7	lincRNA
1516	MSTRG.37298.3	lincRNA
1517	MSTRG.134795.1	lincRNA
1518	MSTRG.87552.4	lincRNA
1519	MSTRG.94975.1	lincRNA
1520	MSTRG.131124.4	lincRNA
1521	MSTRG.54378.1	lincRNA
1522	MSTRG.142991.1	lincRNA
1523	MSTRG.33814.32	lincRNA
1524	MSTRG.100566.1	lincRNA
1525	MSTRG.21200.1	lincRNA
1526	MSTRG.87560.14	lincRNA
1527	MSTRG.54968.1	lincRNA
1528	MSTRG.113341.1	lincRNA
1529	MSTRG.77605.9	lincRNA
1530	MSTRG.41328.1	lincRNA
1531	MSTRG.104711.19	lincRNA
1532	MSTRG.110322.1	lincRNA
1533	MSTRG.40361.1	lincRNA
1534	MSTRG.88815.1	lincRNA
1535	MSTRG.913.26	lincRNA
1536	MSTRG.126326.2	lincRNA
1537	MSTRG.14980.1	lincRNA
1538	MSTRG.137093.4	lincRNA
1539	MSTRG.138867.1	lincRNA
1540	MSTRG.46822.1	lincRNA
1541	MSTRG.74192.8	lincRNA
1542	MSTRG.101563.2	lincRNA
1543	MSTRG.87560.32	lincRNA
1544	MSTRG.42902.35	lincRNA
1545	MSTRG.47647.1	lincRNA
1546	MSTRG.37560.1	lincRNA
1547	MSTRG.130000.1	lincRNA
1548	MSTRG.132280.1	lincRNA
1549	MSTRG.28350.2	lincRNA
1550	MSTRG.25547.34	lincRNA
1551	MSTRG.142108.6	lincRNA
1552	MSTRG.27794.8	lincRNA
1553	MSTRG.3433.1	lincRNA
1554	MSTRG.143290.1	lincRNA
1555	MSTRG.142845.2	lincRNA
1556	MSTRG.73001.1	lincRNA
1557	MSTRG.50292.1	lincRNA
1558	MSTRG.104943.2	lincRNA
1559	MSTRG.14745.4	lincRNA
1560	MSTRG.36066.1	lincRNA
1561	MSTRG.19419.1	lincRNA
1562	MSTRG.94308.1	lincRNA
1563	MSTRG.119488.2	lincRNA
1564	MSTRG.50160.1	lincRNA
1565	MSTRG.66626.1	lincRNA
1566	MSTRG.87560.18	lincRNA
1567	MSTRG.48236.1	lincRNA
1568	MSTRG.76605.5	lincRNA
1569	MSTRG.4693.1	lincRNA
1570	MSTRG.4914.1	lincRNA
1571	MSTRG.21705.3	lincRNA
1572	MSTRG.86603.1	lincRNA
1573	MSTRG.86573.2	lincRNA
1574	MSTRG.31398.1	lincRNA
1575	MSTRG.108631.1	lincRNA
1576	MSTRG.22348.1	lincRNA
1577	MSTRG.29886.8	lincRNA
1578	MSTRG.6710.2	lincRNA
1579	MSTRG.27164.4	lincRNA
1580	MSTRG.110150.1	lincRNA
1581	MSTRG.49067.1	lincRNA
1582	MSTRG.88808.1	lincRNA
1583	MSTRG.72834.2	lincRNA
1584	MSTRG.81007.1	lincRNA
1585	MSTRG.74403.5	lincRNA
1586	MSTRG.129090.9	lincRNA
1587	MSTRG.113652.4	lincRNA
1588	MSTRG.57379.1	lincRNA
1589	MSTRG.9660.2	lincRNA
1590	MSTRG.42904.1	lincRNA
1591	MSTRG.83348.1	lincRNA
1592	MSTRG.89705.1	lincRNA
1593	MSTRG.19316.1	lincRNA
1594	MSTRG.85787.3	lincRNA
1595	MSTRG.64058.1	lincRNA
1596	MSTRG.52705.1	lincRNA
1597	MSTRG.11194.2	lincRNA
1598	MSTRG.28395.1	lincRNA
1599	MSTRG.48742.2	lincRNA
1600	MSTRG.132685.1	lincRNA
1601	MSTRG.129277.2	lincRNA
1602	MSTRG.2392.7	lincRNA
1603	MSTRG.74593.1	lincRNA
1604	MSTRG.43101.1	lincRNA
1605	MSTRG.75209.1	lincRNA
1606	MSTRG.66711.1	lincRNA
1607	MSTRG.98943.2	lincRNA
1608	MSTRG.32980.1	lincRNA
1609	MSTRG.127625.1	lincRNA
1610	MSTRG.38331.2	lincRNA
1611	MSTRG.60833.1	lincRNA
1612	MSTRG.33650.1	lincRNA
1613	MSTRG.127555.1	lincRNA
1614	MSTRG.13248.1	lincRNA
1615	MSTRG.28308.1	lincRNA
1616	MSTRG.129954.1	lincRNA
1617	MSTRG.1946.1	lincRNA
1618	MSTRG.39066.1	lincRNA
1619	MSTRG.21422.1	lincRNA
1620	MSTRG.79939.10	lincRNA
1621	MSTRG.67675.1	lincRNA
1622	MSTRG.60016.1	lincRNA
1623	MSTRG.26056.1	lincRNA
1624	MSTRG.4078.1	lincRNA
1625	MSTRG.135852.2	lincRNA
1626	MSTRG.31628.1	lincRNA
1627	MSTRG.20503.1	lincRNA
1628	MSTRG.16279.28	lincRNA
1629	MSTRG.92221.2	lincRNA
1630	MSTRG.137845.3	lincRNA
1631	MSTRG.20035.5	lincRNA
1632	MSTRG.9897.1	lincRNA
1633	MSTRG.35457.15	lincRNA
1634	MSTRG.48713.1	lincRNA
1635	MSTRG.87549.10	lincRNA
1636	MSTRG.129242.2	lincRNA
1637	MSTRG.34736.17	lincRNA
1638	MSTRG.127548.2	lincRNA
1639	MSTRG.135097.1	lincRNA
1640	MSTRG.7830.5	lincRNA
1641	MSTRG.6732.5	lincRNA
1642	MSTRG.56278.1	lincRNA
1643	MSTRG.92496.1	lincRNA
1644	MSTRG.10484.2	lincRNA
1645	MSTRG.9297.1	lincRNA
1646	MSTRG.84243.1	lincRNA
1647	MSTRG.64559.14	lincRNA
1648	MSTRG.83433.1	lincRNA
1649	MSTRG.70856.2	lincRNA
1650	MSTRG.24718.1	lincRNA
1651	MSTRG.66521.5	lincRNA
1652	MSTRG.69913.1	lincRNA
1653	MSTRG.36765.1	lincRNA
1654	MSTRG.93141.2	lincRNA
1655	MSTRG.2492.2	lincRNA
1656	MSTRG.32403.2	lincRNA
1657	MSTRG.77804.1	lincRNA
1658	MSTRG.20292.3	lincRNA
1659	MSTRG.97590.1	lincRNA
1660	MSTRG.80613.4	lincRNA
1661	MSTRG.28526.5	lincRNA
1662	MSTRG.77131.1	lincRNA
1663	MSTRG.60259.1	lincRNA
1664	MSTRG.4550.1	lincRNA
1665	MSTRG.93504.1	lincRNA
1666	MSTRG.96157.4	lincRNA
1667	MSTRG.106997.2	lincRNA
1668	MSTRG.110423.19	lincRNA
1669	MSTRG.30564.2	lincRNA
1670	MSTRG.144873.1	lincRNA
1671	MSTRG.75859.1	lincRNA
1672	MSTRG.70923.2	lincRNA
1673	MSTRG.10299.1	lincRNA
1674	MSTRG.23426.3	lincRNA
1675	MSTRG.12469.3	lincRNA
1676	MSTRG.32472.1	lincRNA
1677	MSTRG.337.4	lincRNA
1678	MSTRG.91002.1	lincRNA
1679	MSTRG.29515.1	lincRNA
1680	MSTRG.1726.3	lincRNA
1681	MSTRG.104711.1	lincRNA
1682	MSTRG.27304.5	lincRNA
1683	MSTRG.12485.1	lincRNA
1684	MSTRG.99153.6	lincRNA
1685	MSTRG.92179.1	lincRNA
1686	MSTRG.146146.1	lincRNA
1687	MSTRG.122797.1	lincRNA
1688	MSTRG.97889.1	lincRNA
1689	MSTRG.40447.22	lincRNA
1690	MSTRG.64325.1	lincRNA
1691	MSTRG.19895.1	lincRNA
1692	MSTRG.9558.21	lincRNA
1693	MSTRG.125198.1	lincRNA
1694	MSTRG.102542.29	lincRNA
1695	MSTRG.91113.2	lincRNA
1696	MSTRG.27192.1	lincRNA
1697	MSTRG.116540.6	lincRNA
1698	MSTRG.132865.1	lincRNA
1699	MSTRG.65189.1	lincRNA
1700	MSTRG.86593.1	lincRNA
1701	MSTRG.72738.1	lincRNA
1702	MSTRG.144191.4	lincRNA
1703	MSTRG.135190.34	lincRNA
1704	MSTRG.116022.1	lincRNA
1705	MSTRG.55376.1	lincRNA
1706	MSTRG.91181.2	lincRNA
1707	MSTRG.54883.1	lincRNA
1708	MSTRG.15657.4	lincRNA
1709	MSTRG.54578.2	lincRNA
1710	MSTRG.13488.4	lincRNA
1711	MSTRG.54754.2	lincRNA
1712	MSTRG.46031.1	lincRNA
1713	MSTRG.5097.8	lincRNA
1714	MSTRG.77532.3	lincRNA
1715	MSTRG.137948.2	lincRNA
1716	MSTRG.68316.7	lincRNA
1717	MSTRG.62327.95	lincRNA
1718	MSTRG.120237.2	lincRNA
1719	MSTRG.55198.1	lincRNA
1720	MSTRG.142776.5	lincRNA
1721	MSTRG.19985.1	lincRNA
1722	MSTRG.88463.1	lincRNA
1723	MSTRG.129154.1	lincRNA
1724	MSTRG.108885.1	lincRNA
1725	MSTRG.124193.3	lincRNA
1726	MSTRG.39759.2	lincRNA
1727	MSTRG.142102.1	lincRNA
1728	MSTRG.142110.1	lincRNA
1729	MSTRG.91894.1	lincRNA
1730	MSTRG.67655.5	lincRNA
1731	MSTRG.65683.1	lincRNA
1732	MSTRG.42551.2	lincRNA
1733	MSTRG.56130.1	lincRNA
1734	MSTRG.8281.1	lincRNA
1735	MSTRG.33028.1	lincRNA
1736	MSTRG.80242.3	lincRNA
1737	MSTRG.18498.1	lincRNA
1738	MSTRG.145120.2	lincRNA
1739	MSTRG.31945.2	lincRNA
1740	MSTRG.49628.1	lincRNA
1741	MSTRG.102075.1	lincRNA
1742	MSTRG.913.3	lincRNA
1743	MSTRG.55474.2	lincRNA
1744	MSTRG.22974.7	lincRNA
1745	MSTRG.44610.54	lincRNA
1746	MSTRG.34430.1	lincRNA
1747	MSTRG.30562.4	lincRNA
1748	MSTRG.9941.1	lincRNA
1749	MSTRG.10375.1	lincRNA
1750	MSTRG.113182.13	lincRNA
1751	MSTRG.6732.7	lincRNA
1752	MSTRG.4263.3	lincRNA
1753	MSTRG.120073.1	lincRNA
1754	MSTRG.90137.2	lincRNA
1755	MSTRG.26510.75	lincRNA
1756	MSTRG.140512.4	lincRNA
1757	MSTRG.106645.1	lincRNA
1758	MSTRG.4881.1	lincRNA
1759	MSTRG.36634.4	lincRNA
1760	MSTRG.913.21	lincRNA
1761	MSTRG.55414.6	lincRNA
1762	MSTRG.113041.6	lincRNA
1763	MSTRG.93880.17	lincRNA
1764	MSTRG.85043.1	lincRNA
1765	MSTRG.10293.3	lincRNA
1766	MSTRG.9870.2	lincRNA
1767	MSTRG.12469.2	lincRNA
1768	MSTRG.87560.60	lincRNA
1769	MSTRG.124892.1	lincRNA
1770	MSTRG.144987.1	lincRNA
1771	MSTRG.82843.6	lincRNA
1772	MSTRG.3580.1	lincRNA
1773	MSTRG.40278.1	lincRNA
1774	MSTRG.22774.1	lincRNA
1775	MSTRG.104381.16	lincRNA
1776	MSTRG.105053.1	lincRNA
1777	MSTRG.67589.1	lincRNA
1778	MSTRG.40612.1	lincRNA
1779	MSTRG.28426.2	lincRNA
1780	MSTRG.33465.1	lincRNA
1781	MSTRG.104381.14	lincRNA
1782	MSTRG.15454.2	lincRNA
1783	MSTRG.20292.2	lincRNA
1784	MSTRG.103506.1	lincRNA
1785	MSTRG.6371.2	lincRNA
1786	MSTRG.131198.1	lincRNA
1787	MSTRG.137356.5	lincRNA
1788	MSTRG.8310.1	lincRNA
1789	MSTRG.88759.12	lincRNA
1790	MSTRG.7347.1	lincRNA
1791	MSTRG.87357.1	lincRNA
1792	MSTRG.93328.1	lincRNA
1793	MSTRG.137699.1	lincRNA
1794	MSTRG.3357.1	lincRNA
1795	MSTRG.111586.1	lincRNA
1796	MSTRG.67147.1	lincRNA
1797	MSTRG.29886.3	lincRNA
1798	MSTRG.110072.1	lincRNA
1799	MSTRG.135647.1	lincRNA
1800	MSTRG.39419.1	lincRNA
1801	MSTRG.125673.4	lincRNA
1802	MSTRG.110407.1	lincRNA
1803	MSTRG.1166.3	lincRNA
1804	MSTRG.73112.1	lincRNA
1805	MSTRG.74880.2	lincRNA
1806	MSTRG.75173.1	lincRNA
1807	MSTRG.134379.2	lincRNA
1808	MSTRG.44610.56	lincRNA
1809	MSTRG.39923.1	lincRNA
1810	MSTRG.8010.1	lincRNA
1811	MSTRG.14412.4	lincRNA
1812	MSTRG.65595.24	lincRNA
1813	MSTRG.38012.1	lincRNA
1814	MSTRG.55835.13	lincRNA
1815	MSTRG.87209.4	lincRNA
1816	MSTRG.110083.2	lincRNA
1817	MSTRG.121641.27	lincRNA
1818	MSTRG.116743.2	lincRNA
1819	MSTRG.22594.205	lincRNA
1820	MSTRG.8745.2	lincRNA
1821	MSTRG.43799.1	lincRNA
1822	MSTRG.137264.4	lincRNA
1823	MSTRG.20273.2	lincRNA
1824	MSTRG.15775.1	lincRNA
1825	MSTRG.40225.2	lincRNA
1826	MSTRG.47207.2	lincRNA
1827	MSTRG.22974.10	lincRNA
1828	MSTRG.30148.1	lincRNA
1829	MSTRG.125041.1	lincRNA
1830	MSTRG.79840.1	lincRNA
1831	MSTRG.38331.1	lincRNA
1832	MSTRG.29824.2	lincRNA
1833	MSTRG.30433.1	lincRNA
1834	MSTRG.57916.4	lincRNA
1835	MSTRG.31954.1	lincRNA
1836	MSTRG.65595.5	lincRNA
1837	MSTRG.122667.4	lincRNA
1838	MSTRG.125307.3	lincRNA
1839	MSTRG.145056.1	lincRNA
1840	MSTRG.8288.30	lincRNA
1841	MSTRG.70302.2	lincRNA
1842	MSTRG.80083.1	lincRNA
1843	MSTRG.143366.1	lincRNA
1844	MSTRG.33182.1	lincRNA
1845	MSTRG.119705.2	lincRNA
1846	MSTRG.25535.18	lincRNA
1847	MSTRG.113208.2	lincRNA
1848	MSTRG.76495.1	lincRNA
1849	MSTRG.54970.2	lincRNA
1850	MSTRG.105194.1	lincRNA
1851	MSTRG.142102.8	lincRNA
1852	MSTRG.77831.4	lincRNA
1853	MSTRG.5719.1	lincRNA
1854	MSTRG.50242.2	lincRNA
1855	MSTRG.4094.4	lincRNA
1856	MSTRG.131008.8	lincRNA
1857	MSTRG.43544.1	lincRNA
1858	MSTRG.129724.1	lincRNA
1859	MSTRG.126982.1	lincRNA
1860	MSTRG.82982.1	lincRNA
1861	MSTRG.2914.1	lincRNA
1862	MSTRG.7667.2	lincRNA
1863	MSTRG.62144.1	lincRNA
1864	MSTRG.82094.2	lincRNA
1865	MSTRG.44757.3	lincRNA
1866	MSTRG.44439.1	lincRNA
1867	MSTRG.140600.2	lincRNA
1868	MSTRG.35379.4	lincRNA
1869	MSTRG.19120.1	lincRNA
1870	MSTRG.72395.2	lincRNA
1871	MSTRG.143562.1	lincRNA
1872	MSTRG.8674.1	lincRNA
1873	MSTRG.15899.12	lincRNA
1874	MSTRG.81382.8	lincRNA
1875	MSTRG.30432.1	lincRNA
1876	MSTRG.77925.2	lincRNA
1877	MSTRG.134902.1	lincRNA
1878	MSTRG.80044.1	lincRNA
1879	MSTRG.112241.1	lincRNA
1880	MSTRG.51423.5	lincRNA
1881	MSTRG.12428.1	lincRNA
1882	MSTRG.90172.4	lincRNA
1883	MSTRG.91135.5	lincRNA
1884	MSTRG.96269.1	lincRNA
1885	MSTRG.110766.2	lincRNA
1886	MSTRG.126337.1	lincRNA
1887	MSTRG.144165.31	lincRNA
1888	MSTRG.120795.1	lincRNA
1889	MSTRG.79796.1	lincRNA
1890	MSTRG.4683.1	lincRNA
1891	MSTRG.99548.12	lincRNA
1892	MSTRG.129455.1	lincRNA
1893	MSTRG.22594.143	lincRNA
1894	MSTRG.54803.2	lincRNA
1895	MSTRG.80242.5	lincRNA
1896	MSTRG.9002.1	lincRNA
1897	MSTRG.108219.1	lincRNA
1898	MSTRG.44537.23	lincRNA
1899	MSTRG.121849.5	lincRNA
1900	MSTRG.99548.5	lincRNA
1901	MSTRG.87560.37	lincRNA
1902	MSTRG.67647.3	lincRNA
1903	MSTRG.10262.2	lincRNA
1904	MSTRG.7830.3	lincRNA
1905	MSTRG.59673.1	lincRNA
1906	MSTRG.107070.1	lincRNA
1907	MSTRG.108717.1	lincRNA
1908	MSTRG.108493.1	lincRNA
1909	MSTRG.38829.2	lincRNA
1910	MSTRG.86955.4	lincRNA
1911	MSTRG.7778.1	lincRNA
1912	MSTRG.56587.4	lincRNA
1913	MSTRG.33331.6	lincRNA
1914	MSTRG.44874.1	lincRNA
1915	MSTRG.37106.2	lincRNA
1916	MSTRG.27244.3	lincRNA
1917	MSTRG.47336.1	lincRNA
1918	MSTRG.23824.1	lincRNA
1919	MSTRG.42291.2	lincRNA
1920	MSTRG.72747.1	lincRNA
1921	MSTRG.42029.1	lincRNA
1922	MSTRG.129385.1	lincRNA
1923	MSTRG.122123.1	lincRNA
1924	MSTRG.45087.1	lincRNA
1925	MSTRG.58023.1	lincRNA
1926	MSTRG.113705.2	lincRNA
1927	MSTRG.70301.1	lincRNA
1928	MSTRG.73745.3	lincRNA
1929	MSTRG.89972.1	lincRNA
1930	MSTRG.43662.1	lincRNA
1931	MSTRG.49780.3	lincRNA
1932	MSTRG.90078.1	lincRNA
1933	MSTRG.131440.1	lincRNA
1934	MSTRG.86118.1	lincRNA
1935	MSTRG.143136.1	lincRNA
1936	MSTRG.110634.1	lincRNA
1937	MSTRG.4061.1	lincRNA
1938	MSTRG.80735.1	lincRNA
1939	MSTRG.99388.1	lincRNA
1940	MSTRG.136919.1	lincRNA
1941	MSTRG.79238.2	lincRNA
1942	MSTRG.6414.2	lincRNA
1943	MSTRG.24295.8	lincRNA
1944	MSTRG.78559.1	lincRNA
1945	MSTRG.144762.1	lincRNA
1946	MSTRG.41814.1	lincRNA
1947	MSTRG.41659.1	lincRNA
1948	MSTRG.8000.1	lincRNA
1949	MSTRG.77889.1	lincRNA
1950	MSTRG.76404.1	lincRNA
1951	MSTRG.77740.1	lincRNA
1952	MSTRG.79809.2	lincRNA
1953	MSTRG.129886.2	lincRNA
1954	MSTRG.137093.7	lincRNA
1955	MSTRG.30924.2	lincRNA
1956	MSTRG.101298.2	lincRNA
1957	MSTRG.37843.1	lincRNA
1958	MSTRG.120783.1	lincRNA
1959	MSTRG.9397.2	lincRNA
1960	MSTRG.12037.3	lincRNA
1961	MSTRG.14801.3	lincRNA
1962	MSTRG.100194.5	lincRNA
1963	MSTRG.79939.9	lincRNA
1964	MSTRG.7073.1	lincRNA
1965	MSTRG.6828.3	lincRNA
1966	MSTRG.137626.2	lincRNA
1967	MSTRG.45628.4	lincRNA
1968	MSTRG.143674.2	lincRNA
1969	MSTRG.116992.1	lincRNA
1970	MSTRG.35074.2	lincRNA
1971	MSTRG.21148.1	lincRNA
1972	MSTRG.84471.1	lincRNA
1973	MSTRG.125268.1	lincRNA
1974	MSTRG.91278.1	lincRNA
1975	MSTRG.126194.1	lincRNA
1976	MSTRG.72989.1	lincRNA
1977	MSTRG.90973.2	lincRNA
1978	MSTRG.40447.4	lincRNA
1979	MSTRG.128504.7	lincRNA
1980	MSTRG.66149.1	lincRNA
1981	MSTRG.34696.1	lincRNA
1982	MSTRG.62663.2	lincRNA
1983	MSTRG.16839.7	lincRNA
1984	MSTRG.9291.2	lincRNA
1985	MSTRG.4851.1	lincRNA
1986	MSTRG.126319.1	lincRNA
1987	MSTRG.57523.1	lincRNA
1988	MSTRG.57154.1	lincRNA
1989	MSTRG.78000.1	lincRNA
1990	MSTRG.104083.3	lincRNA
1991	MSTRG.113322.2	lincRNA
1992	MSTRG.105242.2	lincRNA
1993	MSTRG.15657.2	lincRNA
1994	MSTRG.76605.7	lincRNA
1995	MSTRG.127329.1	lincRNA
1996	MSTRG.116913.1	lincRNA
1997	MSTRG.113350.1	lincRNA
1998	MSTRG.4774.1	lincRNA
[truncated: 7,442 more rows]
