# Supplementary material for: Expression Profiles and Characteristics of Apple lncRNAs in Roots, Phloem, Leaves, Flowers, and Fruit
Source: Int J Mol Sci. 2022 May 25;23(11):5931. doi: 10.3390/ijms23115931 (PMC9180697; doi:10.3390/ijms23115931)
Supplement: Supplementary file 1 [file ijms-23-05931-s001.zip › Table S4.xlsx]

## Sheet: sheet 1
Table S4 Expression and characteristics of lncRNAs in different tissues
No.	LncRNA_ID	Chr	Flowers	Phloem	Leaves	Roots	Fruits	geneLength	start	end
1	MSTRG.1000.1	Chr00	0	0.113434	0	0.238676	0	388	213	231
2	MSTRG.100010.1	Chr12	0	0.0700677	0	0	0	226	0	72
3	MSTRG.100018.2	Chr12	0.397291	0.109835	0.297415	0.00424233	0	1182	360	402
4	MSTRG.100018.3	Chr12	0.592566	0.0184307	0.574297	0	0	1134	360	402
5	MSTRG.100018.4	Chr12	0.388574	0.115692	0.109544	0	0	1066	345	387
6	MSTRG.100018.5	Chr12	0.0604107	0	0.0265097	0	0	987	225	267
7	MSTRG.100018.6	Chr12	0.056401	0	0.441035	0	0	1980	321	363
8	MSTRG.100023.1	Chr12	0.348643	0	0	0	0.0397633	755	462	486
9	MSTRG.100024.1	Chr12	0.0839813	0	0	0	0	228	51	75
10	MSTRG.100063.1	Chr12	0.00979167	0	0.164928	0	0.0272097	527	24	93
11	MSTRG.100097.1	Chr12	0.247948	0	0.0763693	0	0.053655	553	309	315
12	MSTRG.100099.4	Chr12	0.963377	1.28881	0.57211	1.22691	0.7799	913	21	30
13	MSTRG.1001.1	Chr00	0.0570847	0.0968393	0	0.024532	0	214	0	60
14	MSTRG.100120.1	Chr12	0.00616667	0.102156	0	0	0	230	0	0
15	MSTRG.100152.1	Chr12	0	0.255606	0	0.783806	0	262	0	0
16	MSTRG.100152.2	Chr12	0	0.0843173	0	0.153722	0	223	0	0
17	MSTRG.100176.1	Chr12	0.194272	0.256844	1.05201	0.0446757	0	262	63	108
18	MSTRG.100183.1	Chr12	0.306592	0.00953433	0.433663	0.0280603	0.201337	2333	0	198
19	MSTRG.100183.2	Chr12	0.055803	0	0	0	0.0407357	454	96	96
20	MSTRG.100183.3	Chr12	0.143935	0.0419963	0.145297	0	0.0927823	676	0	0
21	MSTRG.100187.1	Chr12	0	0.011377	0	0.139505	0	278	0	3
22	MSTRG.100194.4	Chr12	0.294682	0.114656	0.595488	0	0	732	27	366
23	MSTRG.100194.5	Chr12	0.498796	0	0	0	0	702	60	336
24	MSTRG.100194.6	Chr12	0.268733	0	0	0	0	672	60	306
25	MSTRG.100227.6	Chr12	0.484754	0.125042	0.53733	0.0721373	0.230882	2111	1884	1956
26	MSTRG.100237.9	Chr12	0.0463717	0	0.169154	0	0.201225	332	0	0
27	MSTRG.10024.2	Chr01	0.0415453	0.45851	0.135451	0.379219	0.0258703	1087	240	321
28	MSTRG.10025.1	Chr01	0.622077	1.11927	0.53016	1.13498	0.157388	1095	228	450
29	MSTRG.100260.1	Chr12	0.0281243	0.457986	0.152019	0.453016	0	786	291	435
30	MSTRG.100260.2	Chr12	0	0	0.172616	0.488014	0	601	150	294
31	MSTRG.100293.1	Chr12	0.0839027	0.0239253	0.190802	0.302219	0.0241613	512	15	96
32	MSTRG.100367.7	Chr12	0.640958	0	0.15117	0	0.065095	1559	0	195
33	MSTRG.10038.1	Chr01	0	0.151978	0.010335	0	0.00531333	1839	723	756
34	MSTRG.100426.1	Chr12	0	0	0	0.022	0.368696	718	495	498
35	MSTRG.10046.3	Chr01	0	6.37337	0	0	0	1808	450	549
36	MSTRG.100494.1	Chr12	0	0.00672367	0	0.202259	0	705	186	225
37	MSTRG.100566.1	Chr12	0.00230733	5.25089	0.0267937	2.98049	0.0281277	695	423	456
38	MSTRG.100586.11	Chr12	0	0	0.161811	0	0	1170	603	639
39	MSTRG.100598.1	Chr12	0.0388073	0.02416	0.0562083	0.0140013	0	439	189	285
40	MSTRG.100611.1	Chr12	0.0418023	0	0	0	0.0641683	269	60	114
41	MSTRG.100613.1	Chr12	0.11013	0.05302	0.0385003	0	0	448	90	141
42	MSTRG.100662.2	Chr12	0	0	0.0533943	0	0.0608063	498	138	318
43	MSTRG.100662.3	Chr12	0.202424	0.0282363	0.162418	0.307375	0.048855	1574	711	717
44	MSTRG.100668.1	Chr12	0	0.113871	0.12289	0.0373297	0	428	165	177
45	MSTRG.100688.2	Chr12	0	0	0.101967	0	0	352	93	198
46	MSTRG.100744.1	Chr12	0.164998	0	0.206484	0	0.000456333	1140	786	960
47	MSTRG.100804.1	Chr12	0.272051	0.406389	0.446096	0.300094	0.0308047	863	0	60
48	MSTRG.100851.1	Chr12	0.0801913	0.312831	0	0.474375	0.032686	217	0	0
49	MSTRG.100873.1	Chr12	0	0.068699	0	0	0	207	0	0
50	MSTRG.100881.1	Chr12	0	0.0129487	0	0.092017	0	277	0	0
51	MSTRG.100885.1	Chr12	0.0103517	0.180891	0.002337	0.137064	0	2907	1236	1302
52	MSTRG.100933.2	Chr12	0.000355333	0	0.000316667	0.0730243	0	484	282	291
53	MSTRG.100947.1	Chr12	0	0	0.115037	0.120861	0	653	198	378
54	MSTRG.100963.1	Chr12	0.029639	0.23943	0.0335557	0.168674	0	3286	378	549
55	MSTRG.100963.2	Chr12	0.00338333	0.215469	0.0193067	0.087716	0	2704	1251	1314
56	MSTRG.100963.3	Chr12	0	0.114158	0.00811133	0.0200097	0	2475	1251	1314
57	MSTRG.100963.7	Chr12	0.0766067	0	0	0.0993557	0	1579	285	564
58	MSTRG.100963.9	Chr12	0.0588927	0.0411257	0.186755	0.0212537	0	1555	507	666
59	MSTRG.101001.1	Chr12	0	0	0.0701907	0	0.0315653	354	54	165
60	MSTRG.101016.2	Chr12	0.102654	0	0	0	0	253	0	0
61	MSTRG.101038.1	Chr12	0.168522	0.120878	0.182761	0.229996	0.0692473	611	360	456
62	MSTRG.101045.1	Chr12	0.133127	0.100236	0	0	0.00417367	876	384	513
63	MSTRG.101050.85	Chr12	0.129022	0	0.175261	0.0174667	0.11102	893	624	738
64	MSTRG.101050.86	Chr12	0.0260737	0	0.0713667	0	0.0730973	1201	912	1044
65	MSTRG.101050.87	Chr12	0.0886867	0.105056	0.0142827	0.117013	0.0817813	1279	987	1122
66	MSTRG.101059.1	Chr12	0.568618	2.48086	0.482379	1.67082	0.194573	259	0	0
67	MSTRG.101148.1	Chr12	0	0.0144337	0	1.50766	0	949	294	396
68	MSTRG.101148.2	Chr12	0.0181447	0.0427927	0.0484787	1.77224	0.00351067	1155	294	396
69	MSTRG.101190.1	Chr12	0.089775	0.350402	0.055141	0.103884	0.81838	317	0	0
70	MSTRG.101190.2	Chr12	0.760979	1.46687	0.749585	0.976603	0.219803	1793	1299	1305
71	MSTRG.101202.1	Chr12	0.0121967	0.292063	0.00647	0	0.106641	1050	3	39
72	MSTRG.101217.1	Chr12	0	0.0102227	0.020946	0	0.136696	246	57	93
73	MSTRG.101260.1	Chr12	0.055848	0	0.044917	0	0	384	0	90
74	MSTRG.101293.1	Chr12	0	0.278332	0	0.176874	0	2808	663	708
75	MSTRG.101297.1	Chr12	0.342647	0.0144383	0	0	0	1130	0	39
76	MSTRG.101298.1	Chr12	0.0123283	0.0489873	0.284227	0.00516167	0	1947	786	939
77	MSTRG.101298.2	Chr12	0.180958	1.50998	0.441063	2.01094	0.0782183	2120	492	645
78	MSTRG.101298.3	Chr12	0	0.188744	0	0.05242	0	1437	114	261
79	MSTRG.101298.4	Chr12	0.207198	0.490368	0.530926	2.52347	0	1406	300	453
80	MSTRG.10136.1	Chr01	0.0122597	0.960305	0.00424033	0.0799447	0.0301363	3199	1239	1266
81	MSTRG.101360.13	Chr12	0	0.0975027	0	0.0251813	0.151463	813	297	303
82	MSTRG.101367.1	Chr12	0	0	0.29167	0.002974	0	271	24	93
83	MSTRG.10137.1	Chr01	0.00122433	0.158653	0.00679533	0.000630333	0.000347667	751	0	36
84	MSTRG.10137.10	Chr01	0	0.158149	0	0.029409	0	738	0	36
85	MSTRG.10137.12	Chr01	0	0.101997	0	0.00958433	0	524	321	369
86	MSTRG.10137.4	Chr01	0	0.130596	0	0.0350943	0	514	0	36
87	MSTRG.10137.9	Chr01	0	0.140136	0	0	0	303	0	36
88	MSTRG.101462.13	Chr12	0.451787	0.53139	0.512593	0.882174	0.318042	481	66	126
89	MSTRG.10148.1	Chr01	0.010915	0	0	0.336598	0	561	168	267
90	MSTRG.10149.1	Chr01	0	0	0	0.0603043	0	351	159	195
91	MSTRG.101502.2	Chr12	0	0.00299233	0.099366	0.0119857	0	1114	735	870
92	MSTRG.101502.4	Chr12	0	0	0.093838	0	0	1845	1098	1194
93	MSTRG.101502.5	Chr12	0	0	0.0599203	0.0445757	0	448	0	42
94	MSTRG.101544.5	Chr12	0.182406	0.0257373	0.123156	0.0522713	0.0517113	963	558	747
95	MSTRG.101551.1	Chr12	0.365759	0	0.00458933	0	0.00998467	522	156	243
96	MSTRG.101563.2	Chr12	0.101094	0	0.0241617	0	0	242	0	0
97	MSTRG.101586.1	Chr12	0	0.0840423	0	0	0	219	0	0
98	MSTRG.101646.1	Chr12	0.021556	1.3695	0.081228	0.549683	0.0323533	1227	105	150
99	MSTRG.101646.2	Chr12	0.0186657	0.253556	0	0.679904	0.007877	638	222	234
100	MSTRG.101664.2	Chr12	0.132603	0.136516	0.181376	0.147671	0.084989	2074	1782	1887
101	MSTRG.101690.1	Chr12	0.220385	0.185009	0	0.589352	0	461	0	99
102	MSTRG.101706.1	Chr12	0.0681163	0.358632	0	0.161772	0	257	0	57
103	MSTRG.101713.1	Chr12	0	0.0605157	0.127343	0.0668883	0	326	102	147
104	MSTRG.101713.2	Chr12	0.0425753	0.042506	0.0440187	0.101404	0	1349	168	288
105	MSTRG.101727.1	Chr12	0	0.123882	0	0	0	334	39	144
106	MSTRG.101741.2	Chr12	0	0.018775	4.59715	0	0	497	213	267
107	MSTRG.101759.1	Chr12	0.0306697	0	0	0.0696223	0	302	0	0
108	MSTRG.101768.1	Chr12	0	0.024883	0	0.176703	0	381	0	0
109	MSTRG.10177.1	Chr01	0.161742	0.264866	0.220418	0.264097	0.0369697	446	171	270
110	MSTRG.101782.1	Chr12	0.861684	1.05413	1.13893	1.33948	0.160593	936	552	585
111	MSTRG.10182.1	Chr01	0.114542	0.193546	0.170756	0.609339	0.0825923	1035	660	810
112	MSTRG.10182.2	Chr01	0.0267067	0.10886	0.0523987	0	0.242991	534	96	282
113	MSTRG.101829.1	Chr12	0.0396273	0	0	0	0.114927	204	0	0
114	MSTRG.101847.2	Chr12	0	0	0	0.0522473	0	222	0	66
115	MSTRG.101852.1	Chr12	0.0154183	0.012896	0.0787777	0.00478067	0.063682	416	0	45
116	MSTRG.101885.1	Chr12	0	0	0.239951	0	0	2354	24	75
117	MSTRG.101885.2	Chr12	0.00810533	0.0727983	2.09341	0.062367	0.0178087	2374	24	75
118	MSTRG.101939.1	Chr12	0.221332	0	0.180292	0.0613413	0	391	132	234
119	MSTRG.102049.8	Chr12	0.193533	0.149965	0.20317	0.284875	0.092393	1473	1098	1179
120	MSTRG.102055.128	Chr12	0	0.0286553	0	0.0769887	1.86667e-05	3172	2328	2463
121	MSTRG.102055.131	Chr12	0.0309337	0.0465647	0.0589767	0.0670597	0.0275833	2459	1836	1971
122	MSTRG.102055.132	Chr12	0.00711633	0	0.070219	0	0	1871	1020	1122
123	MSTRG.102055.133	Chr12	0.0280277	0.044874	0.0355833	0.05786	0.038355	2062	1695	1824
124	MSTRG.102055.138	Chr12	0.0522147	0.0632883	0.0681693	0.0924767	0.0436973	1428	1119	1248
125	MSTRG.102055.139	Chr12	0.0313733	0.0472213	0.0562577	0.077454	0.0407283	2032	1722	1851
126	MSTRG.102055.146	Chr12	0.0562813	0.082808	0.0961483	0.120631	0.0574753	1325	1017	1146
127	MSTRG.102055.209	Chr12	0.0500447	0.00220267	0.249846	0	0.00172067	647	441	492
128	MSTRG.102055.227	Chr12	0.078082	0.103005	0.102242	0.0626837	0.0246727	3216	2382	2526
129	MSTRG.102055.25	Chr12	0	0.136864	0.042148	0.09735	0.0625793	291	135	138
130	MSTRG.102055.95	Chr12	0.103423	0.152949	0.180313	0	8.76667e-05	2766	1920	2022
131	MSTRG.102055.96	Chr12	0.0785403	0.0705023	0.220895	0	0	2640	2337	2466
132	MSTRG.102059.1	Chr12	0	0	0	0.068682	0	217	0	0
133	MSTRG.102060.1	Chr12	0	0.214967	0	0	0	302	0	0
134	MSTRG.102071.1	Chr12	0.00980767	0	0.491828	0	0	630	357	378
135	MSTRG.102071.2	Chr12	0	0.025148	0.348816	0	0	297	0	0
136	MSTRG.102072.4	Chr12	0.13941	0.229755	0.133608	0.519904	0.0763663	377	0	90
137	MSTRG.102072.5	Chr12	0.405543	0.77956	0.677192	1.3163	0.215877	383	75	162
138	MSTRG.102075.1	Chr12	0	0.6897	0	0.0281063	0	2818	2568	2649
139	MSTRG.102075.2	Chr12	0	0.075112	0	0.00842367	0.0867093	445	192	213
140	MSTRG.102080.1	Chr12	0.203556	0.694791	0.111614	1.03887	0.013416	850	567	582
141	MSTRG.102080.2	Chr12	1.18625	0.0307893	0.648725	0.949291	0	430	87	102
142	MSTRG.102129.2	Chr12	0.0484567	0.094219	0	0	0.0105017	254	0	0
143	MSTRG.102151.8	Chr12	0	0	0	0.407481	0	2947	2016	2133
144	MSTRG.102172.1	Chr12	0.0176363	0.0935947	0.0220737	0.132111	0.020497	225	48	69
145	MSTRG.102223.1	Chr12	0.540168	0.091256	0.420739	0.110549	0.279046	1186	405	720
146	MSTRG.102240.1	Chr12	0.075656	0.136295	0.160161	0.056609	0	409	45	93
147	MSTRG.102246.1	Chr12	0.171694	0.276674	0.0851753	0.143535	0.076409	457	36	303
148	MSTRG.102288.2	Chr12	0.145045	0	0	0.0121193	0	932	222	321
149	MSTRG.102292.2	Chr12	0.02394	0	0.0755673	4e-06	0	2625	2391	2472
150	MSTRG.102292.5	Chr12	0	0	0	0.131868	0	1599	363	432
151	MSTRG.102295.1	Chr12	0.249741	0	0	0.002737	0.004906	1170	522	660
152	MSTRG.102298.3	Chr12	0.020509	0.0544123	0.0191943	0.00829967	0	448	129	222
153	MSTRG.102366.2	Chr12	0	0.040931	0	0	0	460	12	240
154	MSTRG.102439.10	Chr13	0.222351	0.0263477	0.069084	0.000975	0.002434	2141	936	966
155	MSTRG.102439.11	Chr13	0.181994	0.0284737	0.127273	0.00540433	0.00342667	624	0	24
156	MSTRG.102439.9	Chr13	0.267109	0.0177997	0.213047	0	0	736	495	513
157	MSTRG.102463.7	Chr13	0.120721	0	0	0	0	756	567	603
158	MSTRG.102534.1	Chr13	0	0	0.19463	0	0	229	0	0
159	MSTRG.102539.1	Chr13	0	0.011082	0	0.117719	0.00522767	1098	585	795
160	MSTRG.102542.23	Chr13	0.0131287	0.062327	0.00415267	0.956724	0.261584	818	0	0
161	MSTRG.102542.24	Chr13	0.022739	0.043	0.001604	0.391327	0.170783	400	0	0
162	MSTRG.102542.25	Chr13	0	0.061853	0	0.160818	0.075282	351	0	0
163	MSTRG.102542.29	Chr13	0	0	0	0.922577	0	760	498	603
164	MSTRG.102547.1	Chr13	0.0229687	0	0	0.0149717	0.0891253	445	60	87
165	MSTRG.10262.1	Chr01	0.351606	0.382423	0.358415	0.198812	0.115033	807	450	543
166	MSTRG.10262.2	Chr01	0	0.286922	0.0373007	0.0330297	0.0177137	265	0	0
167	MSTRG.102676.3	Chr13	0.103027	0.362952	0.0851763	0	0.0484823	1202	591	666
168	MSTRG.10268.1	Chr01	0.227444	0.0208137	0.280255	0.00377733	0.0347857	317	90	162
169	MSTRG.102706.1	Chr13	0	0	0.0405987	0.151578	0	502	0	0
170	MSTRG.10280.1	Chr01	0.0980397	0.0821377	0.0352697	0.026424	0.0347787	277	0	3
171	MSTRG.102833.1	Chr13	0	0.0539743	0	0	0	341	0	0
172	MSTRG.10286.1	Chr01	0.059695	0	0	0	0	216	0	0
173	MSTRG.102884.2	Chr13	0	0.255741	0	0.0849197	0	484	0	72
174	MSTRG.102901.1	Chr13	0	0	0.167843	0	0	706	366	528
175	MSTRG.10293.2	Chr01	0.026616	0	0	0	0.0828567	1413	24	147
176	MSTRG.10293.3	Chr01	0	0	0.0190347	0	0.222949	1154	891	987
177	MSTRG.10293.4	Chr01	0	0	0.0759643	0	0.411445	1068	705	900
178	MSTRG.10293.5	Chr01	0	0	0.0206917	0	0.0750013	895	609	726
179	MSTRG.10296.1	Chr01	0.09526	0.147628	0.051512	0.101884	0.0826073	385	48	51
180	MSTRG.102983.1	Chr13	0.075101	0.0707693	0	0	0.27798	1300	414	492
181	MSTRG.102983.2	Chr13	0.0384593	0.0744107	0	0	0.0417423	347	18	84
182	MSTRG.102984.1	Chr13	2.68554	0	0	2.96886	30.4997	2017	378	456
183	MSTRG.102984.4	Chr13	0.13816	0	0.0861213	0.227755	0.099251	2742	1050	1128
184	MSTRG.102984.5	Chr13	0.332512	0	0	1.4374	5.85248	1950	372	450
185	MSTRG.10299.1	Chr01	0.163715	0.03475	0.0461257	0	0.021279	271	78	99
186	MSTRG.103008.1	Chr13	0	0.114904	0	0	0	567	309	351
187	MSTRG.103048.1	Chr13	0	0.057746	0	0.017256	0	249	0	0
188	MSTRG.103065.1	Chr13	0.097417	0.097803	0.049537	0.228077	0.037466	570	108	252
189	MSTRG.103139.1	Chr13	0.226263	0.0391183	0.0129313	0.036013	5.84527	667	267	333
190	MSTRG.103191.1	Chr13	2.09601	0.108618	1.7906	0.062515	1.85537	3693	978	1065
191	MSTRG.103191.2	Chr13	4.95321	3.04962	4.46756	2.96711	5.00095	2345	798	846
192	MSTRG.103191.3	Chr13	0	0.846916	0.171001	1.13102	0.137744	1394	96	144
193	MSTRG.103191.4	Chr13	2.56443	1.0552	3.49991	1.1275	1.06146	3881	3390	3513
194	MSTRG.103191.5	Chr13	1.33632	4.50626	2.4447	5.07709	0	2522	2088	2214
195	MSTRG.103192.1	Chr13	0	0.104518	0	0	0.038122	523	42	90
196	MSTRG.103193.1	Chr13	0.182279	7.36617	0.0210683	10.7323	0.721069	315	18	111
197	MSTRG.103193.2	Chr13	0	1.40884	0.0187583	3.5178	0.086549	233	0	27
198	MSTRG.103193.3	Chr13	2.05417	33.2812	0.33753	49.6475	0.825443	361	0	18
199	MSTRG.103194.1	Chr13	0	0	0	0.052306	0	202	0	0
200	MSTRG.103245.1	Chr13	0	0.180357	0	0.10178	0.013376	388	87	111
201	MSTRG.103253.12	Chr13	0.213388	0.224117	0.183502	0.123143	0.0303763	1848	174	357
202	MSTRG.103253.14	Chr13	0.592638	1.41676	0.559544	0.465349	0.129434	1473	177	234
203	MSTRG.103253.3	Chr13	0.172266	0	0.169714	0	0.511979	2763	171	228
204	MSTRG.103253.5	Chr13	0	0.984084	0	1.30604	0	2536	174	231
205	MSTRG.103253.6	Chr13	0.0140903	0.233116	0.0256167	0.366974	0.003064	2538	174	231
206	MSTRG.103277.1	Chr13	0.237527	0.223917	0.00933867	0.160069	0	427	0	273
207	MSTRG.103277.2	Chr13	0	0.112958	0.012329	0.104402	0.018909	457	0	303
208	MSTRG.103277.3	Chr13	0.043188	0.00322533	0.105599	0	0	298	0	114
209	MSTRG.103371.1	Chr13	0	0.119854	0	0	0	271	0	15
210	MSTRG.103458.1	Chr13	0.088577	0	0.085756	0	0.190889	775	189	297
211	MSTRG.103464.1	Chr13	0	0.00314733	0	0.076908	0	821	111	387
212	MSTRG.103495.1	Chr13	0	0	0	0.274797	0	944	495	741
213	MSTRG.103506.1	Chr13	0.607567	0.859429	0.942903	1.64065	0.0205103	617	0	108
214	MSTRG.103506.2	Chr13	0.152495	0.245242	0.307109	0.317667	0	768	0	108
215	MSTRG.103506.3	Chr13	0.123308	0.147339	0.401958	0.173813	0.0413947	823	0	147
216	MSTRG.103506.4	Chr13	0.0232037	0.0508233	0.213019	0.178957	0	516	0	108
217	MSTRG.103506.5	Chr13	0.0452187	0.126218	0	0.0206913	0	482	0	123
218	MSTRG.103511.1	Chr13	0.0707883	0.130632	0.062949	0.0463807	0.0177957	301	0	63
219	MSTRG.103531.1	Chr13	0.127009	0	0	0	0	278	0	123
220	MSTRG.103555.1	Chr13	0.038691	0.0814177	0.149464	0	0.0375913	464	0	0
221	MSTRG.103602.1	Chr13	0.0946477	0.0326107	0.787414	0.004073	0	1583	513	582
222	MSTRG.103636.1	Chr13	0.398625	0.545381	0.435399	0.307535	0.0293973	615	141	318
223	MSTRG.10365.1	Chr01	0.204419	0.125263	0.18584	0.175424	0.055426	2139	1788	1986
224	MSTRG.10365.2	Chr01	0.00956133	0.135921	0.0734267	0	0.0177307	2699	2352	2544
225	MSTRG.10365.3	Chr01	0.119633	0.032281	0	0	0	2297	1968	2142
226	MSTRG.103661.2	Chr13	0.10128	0.125324	0.278822	0.189113	0	1270	387	525
227	MSTRG.103661.3	Chr13	0.0194387	0.084291	0.187292	0.138785	0	1640	1266	1368
228	MSTRG.103661.4	Chr13	0.0382837	0.180389	0.038322	0.364344	0	521	228	330
229	MSTRG.103661.5	Chr13	0.0418937	0.060189	0	0.0830863	0	751	93	102
230	MSTRG.103702.1	Chr13	0	0	0	0.179935	0	232	0	0
231	MSTRG.10375.1	Chr01	0	0	0	0.131546	0	257	0	21
232	MSTRG.103783.2	Chr13	0.182918	0.312095	0.142295	0.487405	0.168061	615	39	42
233	MSTRG.103783.3	Chr13	0.219471	0.375906	0.313553	0.624662	0.127053	575	0	0
234	MSTRG.103867.1	Chr13	0.261252	0.249265	0.199789	0.566115	0.0258743	738	390	564
235	MSTRG.103867.2	Chr13	0	0.342512	0	0.282092	0.0367703	420	3	27
236	MSTRG.103867.3	Chr13	0.002938	0.0714963	0.002856	0.0462923	0.000979667	442	147	285
237	MSTRG.10391.1	Chr01	0.156657	0	0	0	0	359	0	36
238	MSTRG.103911.2	Chr13	0.10865	0.0495303	0	0	0.0602993	975	717	813
239	MSTRG.103911.4	Chr13	0	0	0	0	0.052688	614	168	246
240	MSTRG.103931.2	Chr13	0	0.0694297	0.0392	0.579944	0	2230	840	1089
241	MSTRG.103931.3	Chr13	0	0.0826107	0.031161	0.0841523	0	813	267	528
242	MSTRG.103940.1	Chr13	0.0187507	0.081756	0	0	0	332	0	6
243	MSTRG.103940.2	Chr13	0.0780543	0.0946883	0	0	0.0118447	625	129	234
244	MSTRG.103941.1	Chr13	0.098836	0	0	0	0	514	54	252
245	MSTRG.10400.2	Chr01	0.148309	0	0	0.0195453	0	425	0	6
246	MSTRG.104010.1	Chr13	0.00597467	2.45587	0.006444	1.9056	0	266	0	0
247	MSTRG.104083.1	Chr13	0.018868	0.03637	0.262181	0	0	782	246	327
248	MSTRG.104083.2	Chr13	0	0	0.567473	0.033862	0	750	249	324
249	MSTRG.104083.3	Chr13	0.0587073	0.009565	0.356248	0.0260783	0	1137	543	711
250	MSTRG.104099.1	Chr13	0	0.300652	0	0	0	1556	0	324
251	MSTRG.104180.1	Chr13	0.152676	0.00813433	0.0132473	0.0125727	0.669999	868	102	198
252	MSTRG.104180.2	Chr13	0.0750273	0	0	0	0.217084	729	393	420
253	MSTRG.104221.1	Chr13	0.091276	0	0	0.470789	0.0257013	3770	3513	3615
254	MSTRG.104221.2	Chr13	0	0	0	0.143072	0.0152943	2894	2652	2739
255	MSTRG.104221.3	Chr13	0	0	0.143942	0.0753057	0.149938	3820	3582	3666
256	MSTRG.10423.1	Chr01	0.005251	0.061933	0	0	0	520	204	363
257	MSTRG.104245.2	Chr13	0	0	0.0705277	0	0	823	45	195
258	MSTRG.104248.1	Chr13	0	0.0521617	1.60008	0.00549167	0.0578557	962	495	525
259	MSTRG.104248.2	Chr13	0.0196093	0	1.76057	0	0	765	78	123
260	MSTRG.104275.1	Chr13	0.0546323	0.136823	0.36582	0.124013	0	242	0	87
261	MSTRG.104333.1	Chr13	0	0.379273	0.0176683	0.005187	0	769	0	0
262	MSTRG.104337.1	Chr13	0	0.119563	0	0.182094	0	1517	1041	1362
263	MSTRG.104337.5	Chr13	0.01744	0	0.340111	0.045078	0	621	117	219
264	MSTRG.104381.13	Chr13	0.0646737	0.10469	0.0107993	0.0429823	0.0225997	2981	2304	2382
265	MSTRG.104381.14	Chr13	0.125085	0.160484	0.0924533	0.0873177	0.00124533	2760	2259	2391
266	MSTRG.104381.15	Chr13	0.0440777	0.0604917	0.024053	0.072694	0	2760	2259	2391
267	MSTRG.104381.16	Chr13	0.173532	0.0358287	0.0465657	0.297948	0.000260333	2841	2166	2244
268	MSTRG.104381.17	Chr13	0.111618	0.0901917	0.0702623	0.136817	0.130573	4776	1560	1692
269	MSTRG.104381.18	Chr13	0.13205	0.494261	0.125475	0.201836	0	3718	3153	3291
270	MSTRG.104381.19	Chr13	0.0508267	0.048698	0.019008	0.0600067	0.00113233	2843	2166	2244
271	MSTRG.104381.20	Chr13	0.001459	0.0611913	0.000853	0.0884363	0	2759	2259	2391
272	MSTRG.104381.21	Chr13	0.152614	0.141156	0.124642	0.221466	0.0136193	2761	2259	2391
273	MSTRG.104381.22	Chr13	0.19266	0.0781367	0.0445407	0.056678	0.020071	3678	3180	3312
274	MSTRG.104381.23	Chr13	0.307644	0.311947	0.405522	0.252056	0.022374	2747	2247	2379
275	MSTRG.104381.26	Chr13	0.0457213	0.128573	0.0428753	0.03333	0	1796	1119	1197
276	MSTRG.104381.27	Chr13	0.505524	0.117699	0.0192783	0.0707053	0	2664	2163	2295
277	MSTRG.104381.29	Chr13	0.335526	0.120796	0.074203	0.0230797	0.001628	1945	522	618
278	MSTRG.104381.31	Chr13	0.63017	0.146635	0.0847497	0.135972	0	1552	663	696
279	MSTRG.104381.36	Chr13	0.353215	0.0885923	0.0953277	0.0561887	0	2623	2121	2253
280	MSTRG.104381.38	Chr13	0.176418	0.0172433	0	0	0	526	0	0
281	MSTRG.104381.39	Chr13	0.124451	0.0732123	0.028884	0.086376	0.000359	2706	1860	1905
282	MSTRG.104381.4	Chr13	1.82908	0.516989	0.368426	0.176695	0.0530243	2878	345	483
283	MSTRG.104381.40	Chr13	0.0904763	0.0187787	0.0160113	0.035979	0	2623	2121	2253
284	MSTRG.104381.41	Chr13	0.257347	0.091688	0.0622963	0.0272023	0.00375367	1908	441	621
285	MSTRG.104381.44	Chr13	0.994915	0.509808	0.393934	0.256302	0.017734	2668	1992	2070
286	MSTRG.104381.45	Chr13	0.599878	0.561209	0.628177	0.13202	0.060074	1866	522	618
287	MSTRG.104381.48	Chr13	0.199659	0.118915	0.0809333	0.157008	0.00262933	2085	1239	1284
288	MSTRG.104381.51	Chr13	0.0219727	4.95505	2.97425	2.54602	0.0304357	2952	2274	2352
289	MSTRG.104381.7	Chr13	0.217616	0.19746	0.126001	0.0661053	0.005623	1227	522	660
290	MSTRG.104419.1	Chr13	1.14976	0.0283803	0.538112	0.002493	0	2829	339	387
291	MSTRG.10444.29	Chr01	0.0186413	0.136076	0.056353	1.73333e-05	0	572	267	348
292	MSTRG.104569.1	Chr13	0.156719	0	0	0	0	647	333	441
293	MSTRG.104651.1	Chr13	0	0	0	0.043446	0	685	102	234
294	MSTRG.104665.1	Chr13	0.168604	0.176651	0.092331	0.271134	0.0298463	630	0	63
295	MSTRG.104665.2	Chr13	0	0.266876	0.026683	0.24317	0.0757043	500	0	15
296	MSTRG.104711.1	Chr13	0.66439	0.871693	0.152197	0.706469	0.0136893	1956	1728	1800
297	MSTRG.104711.12	Chr13	0.323584	0.307197	0.179676	0.165228	0.0362447	1669	1185	1257
298	MSTRG.104711.13	Chr13	0.032538	0.0116463	0.0403353	0.48397	0	2544	1179	1251
299	MSTRG.104711.19	Chr13	0.528399	0.504701	0.250339	0.131845	0.0103723	1502	1017	1089
300	MSTRG.104711.23	Chr13	1.15281	0.895478	0.106669	0.440797	0.00209233	1314	252	297
301	MSTRG.104711.3	Chr13	0.00763533	0.132713	0.00708667	0	0.00533233	2839	2613	2685
302	MSTRG.104711.4	Chr13	0.794602	1.10472	0.4564	0.580062	0.105551	1791	252	297
303	MSTRG.104711.5	Chr13	1.45069	1.16512	0.569563	0.439829	0.081327	1791	252	297
304	MSTRG.104711.6	Chr13	0.796811	0.945161	0.537295	0.776418	0.0935927	1791	252	297
305	MSTRG.104711.7	Chr13	0.428902	0.649924	0.0714227	0.30236	0.0256323	2435	1308	1380
306	MSTRG.104782.1	Chr13	0	0.105933	0	0	0	362	78	207
307	MSTRG.104792.1	Chr13	0.102303	0.0919753	0.0670977	0.118093	0.052355	479	0	0
308	MSTRG.104820.1	Chr13	0.242036	0.0379063	0.109871	0.072624	0.0174637	293	51	138
309	MSTRG.10484.2	Chr01	0.228642	0.151229	0.635791	0.381069	0.0950337	2194	258	390
310	MSTRG.104943.2	Chr13	0	0.34119	0	0	0	2758	153	300
311	MSTRG.104943.3	Chr13	0.00232233	0.0928833	0.00828233	0	0	2776	156	354
312	MSTRG.104943.5	Chr13	0	0.49707	0	0	0	1561	156	303
313	MSTRG.10495.1	Chr01	0	0.173192	0	0	0	265	42	45
314	MSTRG.104965.3	Chr13	0.123305	0	0	0	0	415	90	207
315	MSTRG.104967.2	Chr13	0.0153507	0.178067	0.158554	0.0480217	0.004407	223	63	66
316	MSTRG.10503.7	Chr01	0.223478	0.245845	0.46484	0.328	0.0248803	613	252	291
317	MSTRG.105053.1	Chr13	0	0	0	0.0773067	0	400	0	153
318	MSTRG.10509.1	Chr01	0.0258207	0.0612193	0.28507	0.0261473	0	342	0	48
319	MSTRG.105101.1	Chr13	0	0	0.0508793	0.00653133	0.02	226	0	69
320	MSTRG.105113.1	Chr13	0	0.014508	0.010535	0.114417	0	260	0	0
321	MSTRG.105132.2	Chr13	0	0	0.0286223	0.0998887	0	1342	18	228
322	MSTRG.105138.3	Chr13	0.192522	0	0	0	0	606	378	423
323	MSTRG.10516.32	Chr01	0.0351553	0	0.0700653	0.0382717	0	1122	162	198
324	MSTRG.105185.1	Chr13	0.144013	0	0	0	0	241	0	0
325	MSTRG.10519.1	Chr01	0.0866303	0.0656723	0.210633	0.174463	0.0338397	1240	669	813
326	MSTRG.10519.2	Chr01	0.014548	0	0.101872	0.111343	0	1126	726	870
327	MSTRG.105194.1	Chr13	0.121227	0.286198	0.0279977	0.10188	0.115473	474	156	288
328	MSTRG.105229.1	Chr13	0.183341	0.104482	0	0.113464	0	267	27	84
329	MSTRG.105242.2	Chr13	0.398678	1.14269	0.207155	1.20109	0	1477	336	426
330	MSTRG.105243.1	Chr13	0	0	0	0.420724	0	937	501	591
331	MSTRG.105263.1	Chr13	0.0916977	0.061031	0	0	0	434	174	195
332	MSTRG.105264.10	Chr13	0.0850513	0.468344	0	0.109203	0.107531	377	0	0
333	MSTRG.105264.8	Chr13	0.0955857	0.208902	0	0	0.0769503	410	0	0
334	MSTRG.105264.9	Chr13	0.129413	0	0	0	0	1277	636	720
335	MSTRG.105378.1	Chr13	0	0	0	0.0453783	0	345	0	0
336	MSTRG.105388.3	Chr13	0.020918	11.3345	0.0260337	4.35854	0	308	30	111
337	MSTRG.105432.4	Chr13	0.256352	0	0	0.16545	0	879	375	414
338	MSTRG.105432.5	Chr13	0.197222	0	0.049714	0	0.037085	859	297	465
339	MSTRG.105454.2	Chr13	0	0.0518517	0	0	0	351	0	0
340	MSTRG.105500.2	Chr13	0	0.0408687	0	0	0	237	0	0
341	MSTRG.105510.1	Chr13	0.00779233	0.130438	0.0182757	0.1634	0	581	129	246
342	MSTRG.105511.1	Chr13	0.15854	0.0314957	0.29264	0	0.0151333	298	36	144
343	MSTRG.105519.2	Chr13	0	0	0	0.0803877	0	508	276	303
344	MSTRG.105522.2	Chr13	0	0	0.0440667	0.04415	0	448	63	201
345	MSTRG.105526.1	Chr13	0	0	0	0.152325	0	328	0	0
346	MSTRG.105536.2	Chr13	0	0.13612	0	0.211831	0	450	87	150
347	MSTRG.105558.2	Chr13	0	0.165297	0	0	0	1915	585	744
348	MSTRG.105558.3	Chr13	0	0.450553	0.00361833	0	0	2500	507	666
349	MSTRG.105558.5	Chr13	0.063719	0	0	0	0	234	27	63
350	MSTRG.10556.1	Chr01	0.109157	0	0	0	0	216	0	0
351	MSTRG.105569.1	Chr13	0.209236	0.29618	0.279894	0.343816	0.115191	642	186	273
352	MSTRG.105604.1	Chr13	0.101113	1.08814	0.0217397	0	0.0391037	642	285	300
353	MSTRG.105604.2	Chr13	0.0929253	0.804195	0.0164487	0	0.036686	642	285	300
354	MSTRG.105614.1	Chr13	0.622069	0.468957	0.0411097	0.363319	0	1076	69	96
355	MSTRG.105628.14	Chr13	0.127175	0.354251	0.141855	0.266741	0.0994007	1977	1092	1248
356	MSTRG.105634.1	Chr13	0.0754053	0.458069	0.204261	0.111614	0.036654	1682	180	315
357	MSTRG.105634.3	Chr13	0	0	0.117493	0	0	1315	165	300
358	MSTRG.105680.1	Chr13	0	0.169261	0	0	0	1748	264	405
359	MSTRG.105680.2	Chr13	0	0.140634	0	0	0	1445	0	135
360	MSTRG.1057.1	Chr00	0.0704293	0	0	0	0.00449767	203	6	48
361	MSTRG.105700.1	Chr13	0.108627	0	0.014302	0.00782767	0	402	105	174
362	MSTRG.105740.1	Chr13	0.072548	0.0689453	0	0.083966	0	454	0	0
363	MSTRG.105758.2	Chr13	0.185832	0.0533003	0.337324	0.548574	0.0168687	2382	291	402
364	MSTRG.105774.1	Chr13	0	0.064445	0	0.0168147	0.0305813	234	0	0
365	MSTRG.105812.1	Chr13	0.0793543	0	0	0	0	270	36	114
366	MSTRG.105877.1	Chr13	0.118547	0	0	0	0	240	18	84
367	MSTRG.105894.6	Chr13	0.05523	0	0.148682	0	0.058076	1370	1044	1044
368	MSTRG.10593.5	Chr01	0	0.104694	0	0.00890133	0	293	0	0
369	MSTRG.105948.1	Chr13	0	0.0721673	0	0	0.0105923	519	45	189
370	MSTRG.105999.18	Chr13	0.105145	1.57994	0.283459	0.759375	0.00573967	1246	150	297
371	MSTRG.10602.1	Chr01	0	0.0941183	0.0624317	0.346958	0	506	102	153
372	MSTRG.106042.1	Chr13	0.0449733	0	0.777656	0	0	952	132	327
373	MSTRG.106042.2	Chr13	0	0	0.152146	0	0	918	189	294
374	MSTRG.106047.15	Chr13	0.0419327	0.113402	0.0103137	0.0927367	0.0958347	3224	741	831
375	MSTRG.10605.2	Chr01	0.210986	0.641785	0.267711	0.320289	0.336383	235	0	0
376	MSTRG.10605.3	Chr01	0.069984	0.0787237	0.166171	0.198199	0.25621	234	0	0
377	MSTRG.106053.3	Chr13	0.0447537	0.119726	0.039236	0.0170937	0.012701	1972	1248	1296
378	MSTRG.106053.5	Chr13	0.0248673	0.189975	0	0.0142887	0.159507	1107	123	171
379	MSTRG.106053.7	Chr13	0.0362083	0.274168	0.0910203	0	0.013156	2439	438	669
380	MSTRG.10606.1	Chr01	0.0223393	0.453601	0	0	0	252	0	0
381	MSTRG.106099.1	Chr13	0	0.104873	0	0	0	234	0	54
382	MSTRG.106142.1	Chr13	0.168619	0	0	0	0	338	87	162
383	MSTRG.106174.2	Chr13	0.755085	0.345757	0.788706	1.06481	0.324258	1313	564	729
384	MSTRG.106277.1	Chr13	0.355444	0.0843153	0.236634	0.154883	0.204987	957	33	48
385	MSTRG.106286.1	Chr13	0.532383	0.304445	0.606455	0.0859373	0.0192343	2040	1629	1767
386	MSTRG.1063.10	Chr00	6e-06	0	0.005981	0.107683	0	1618	117	255
387	MSTRG.1063.4	Chr00	0.119081	0.116123	0.0651533	0.2956	0	1728	117	255
388	MSTRG.1063.5	Chr00	0.00304533	0.137709	0.026994	0.431129	0	2289	162	288
389	MSTRG.1063.6	Chr00	0.0946193	0.0494583	0.0485803	0.0968633	0	837	117	255
390	MSTRG.1063.7	Chr00	1.6e-05	0.047358	0.00146267	0.12141	0	2209	177	390
391	MSTRG.1063.8	Chr00	0.051433	0.079678	0.0294647	0.406611	0.00721	788	117	255
392	MSTRG.1063.9	Chr00	0	0.0133677	0.0192483	0.0637773	0.00924633	736	117	255
393	MSTRG.10630.8	Chr01	0.0747047	0.147538	0.255688	0.50552	0.040115	671	348	405
394	MSTRG.10630.9	Chr01	0.0262217	0.0874567	0.0163413	0.0837753	0.0504297	518	189	252
395	MSTRG.106316.2	Chr13	0	0	0	0.160232	0	1134	585	756
396	MSTRG.106368.1	Chr13	0	0.0871437	0	0.54128	0	508	0	0
397	MSTRG.106374.10	Chr13	0	0	0.238094	0.000600667	0	2489	888	1179
398	MSTRG.106374.12	Chr13	0.063111	0.00626	0.700923	0.00895267	0.00492667	2511	912	1203
399	MSTRG.106374.14	Chr13	0.00688167	0.0471527	0.449897	0.0296947	0.00308433	1861	96	141
400	MSTRG.106382.1	Chr13	0	0.0673297	0	0.061836	0	978	0	90
401	MSTRG.106386.1	Chr13	0.007231	0.829263	0.234507	0	0.018948	1774	0	90
402	MSTRG.106386.2	Chr13	0	0.142881	0	0	0	446	0	84
403	MSTRG.106386.3	Chr13	0	0.080663	0	0	0	538	222	342
404	MSTRG.106411.1	Chr13	0	0	0.0250233	0.0779927	0	248	27	63
405	MSTRG.106453.1	Chr13	0.0790297	0	0	0	0	224	0	0
406	MSTRG.106502.1	Chr13	0.032308	0.857662	0.26222	4.12886	0.0476483	1471	771	834
407	MSTRG.106502.2	Chr13	0	2.4281	0.036791	2.48251	0	844	0	21
408	MSTRG.106507.2	Chr13	0.185429	0	0	0	0	395	219	240
409	MSTRG.106517.2	Chr13	0.138381	0	0	0.00240767	0	830	228	387
410	MSTRG.106517.3	Chr13	0.092629	0	0	0.00932733	0	713	138	297
411	MSTRG.106519.1	Chr13	0	8.97383	0	40.8382	0.0548513	248	0	0
412	MSTRG.106519.2	Chr13	0	1.95579	0.0405847	20.5012	0.0103203	385	0	0
413	MSTRG.106543.1	Chr13	0.00592567	0.308294	0.00528433	0.188222	0	272	3	6
414	MSTRG.106576.1	Chr13	0.529732	0.552198	0.432743	0.662604	0.304123	511	3	108
415	MSTRG.106582.1	Chr13	0.0643087	0.195405	0.0462217	0.197486	0.119274	256	0	0
416	MSTRG.106584.1	Chr13	0	0.169498	0	0.160711	0	206	0	27
417	MSTRG.106645.1	Chr13	0.030057	0.0530623	0	0	0	268	0	0
418	MSTRG.106670.1	Chr13	0	0	0.0256993	0	0.112196	382	0	24
419	MSTRG.106706.1	Chr13	0.099651	0.0252833	0.012374	0.0128057	0.469368	1988	1695	1833
420	MSTRG.106716.1	Chr13	0	0	0	0	0.454408	558	117	234
421	MSTRG.106747.1	Chr13	0.401496	0.100769	0.12652	0.029898	0	995	237	381
422	MSTRG.106750.2	Chr13	0.218226	0.008188	0.016225	0	0	1154	666	765
423	MSTRG.106777.2	Chr13	0	0	0	0	0.056409	202	0	48
424	MSTRG.1068.1	Chr00	0.0289117	0	0.11658	0	0	383	129	156
425	MSTRG.106821.1	Chr13	0.00991333	0.37639	0.00888633	0.312099	0.160548	647	243	333
426	MSTRG.106825.4	Chr13	0.00663267	0.36149	0.0504407	0	0.004748	2422	825	957
427	MSTRG.106880.1	Chr13	0	0.372653	0	0	0.268628	1096	408	552
428	MSTRG.10690.2	Chr01	0.0717297	0	0.0805363	0	0	2979	651	741
429	MSTRG.10690.5	Chr01	0	0	1.50316	0	0	3034	651	702
430	MSTRG.10690.6	Chr01	0	0	0.805874	0	0	2619	651	702
431	MSTRG.10690.8	Chr01	0.04424	0	0.132095	0	0	1230	0	81
432	MSTRG.106908.2	Chr13	0.210622	0	0	0	0	1155	714	735
433	MSTRG.106909.1	Chr13	0.0941127	0	0.327046	0.012825	0.077225	357	33	105
434	MSTRG.106916.2	Chr13	0.0450287	0	0.00445267	0	0.462503	545	18	213
435	MSTRG.106916.3	Chr13	0.023195	0	0.0254957	0.0198767	0.271802	651	228	330
436	MSTRG.106938.1	Chr13	0.038496	0.299495	0.112404	0.035558	0.139564	489	48	72
437	MSTRG.106960.1	Chr13	3.15169	0.00202567	3.59908	0	0	1170	726	750
438	MSTRG.106997.2	Chr13	0	0.163472	0	0	0	636	111	330
439	MSTRG.107012.1	Chr13	0	0.192004	0	0.113704	0	337	0	81
440	MSTRG.107070.1	Chr13	0	0	0	0.384002	0	912	555	624
441	MSTRG.10722.1	Chr01	0.619323	2.2427	2.45279	3.36022	0.476137	1728	714	732
442	MSTRG.10722.10	Chr01	0	0.577888	0	0.51516	0.024337	1614	714	732
443	MSTRG.10722.11	Chr01	0.190943	0.453781	0.648216	1.34094	0.060864	1072	171	189
444	MSTRG.10722.2	Chr01	0.298433	0.84128	0.871367	1.49312	0.141706	1728	714	732
445	MSTRG.10722.22	Chr01	0	0.290267	0	0	0	1614	714	732
446	MSTRG.10722.23	Chr01	0.22904	0.0339493	0	0	0	1098	117	135
447	MSTRG.10722.25	Chr01	0.0438973	0.41776	0.000499667	0.00297833	0.064284	1600	714	732
448	MSTRG.10722.31	Chr01	0	0.405145	0	0	0	1183	171	189
449	MSTRG.10722.32	Chr01	2.22501	2.67429	3.70057	2.65626	3.26186	4711	4125	4332
450	MSTRG.10722.4	Chr01	0	0.287564	0.128096	0.163232	0	1728	714	732
451	MSTRG.10722.5	Chr01	0.000172333	0.469197	0.194467	0	0.0962863	1725	711	729
452	MSTRG.10722.8	Chr01	0.150724	0.0683743	0.0664297	0.0806183	0.0420657	2587	0	90
453	MSTRG.10722.9	Chr01	0	0.0586767	0.0657863	0.492156	0.0827617	1610	711	729
454	MSTRG.107224.1	Chr13	0.0902543	0.156799	0.0884753	0.196997	0.0299227	551	144	177
455	MSTRG.107246.1	Chr13	0	0.0506743	0	0	0	367	129	207
456	MSTRG.107300.1	Chr13	0.175925	0	0	0	0	210	0	57
457	MSTRG.107381.10	Chr13	0	0.076522	0	0.165854	0.086358	919	636	648
458	MSTRG.107381.11	Chr13	0	0.10183	0	0.141343	0	691	516	528
459	MSTRG.107381.12	Chr13	0.007296	0.375978	0.0191613	0.074424	0.0142857	2344	417	543
460	MSTRG.107381.13	Chr13	0	0.0728597	0	0.051912	0.04414	430	261	273
461	MSTRG.107382.1	Chr13	0	0.0449357	0	0.150927	0	237	0	0
462	MSTRG.10741.1	Chr01	0	0.0841823	0.014272	0.102284	0	476	186	321
463	MSTRG.107415.1	Chr13	0	0	0.0516237	0	0	222	18	27
464	MSTRG.107418.1	Chr13	0	0	0.324427	0	0	608	435	453
465	MSTRG.10742.2	Chr01	0.0596547	0	0	0	0	369	0	0
466	MSTRG.107423.2	Chr13	0.0202043	0	0.194189	0	0	1685	1467	1530
467	MSTRG.107460.2	Chr13	0.0829163	0	0	0	0.0147357	240	3	84
468	MSTRG.107496.5	Chr13	0.298793	0.468294	0.330425	0.340646	0.163103	3270	2808	2961
469	MSTRG.107507.1	Chr13	0	0	0	0.084417	0	412	54	75
470	MSTRG.107531.1	Chr13	0.080175	0	0	0.043543	0	280	111	123
471	MSTRG.107531.2	Chr13	0.048481	0	0.0361717	0.0491003	0.0627073	386	63	156
472	MSTRG.107554.1	Chr13	0	0.0702603	0	0.130446	0	216	0	45
473	MSTRG.107586.8	Chr13	0.004689	0.0890137	0	0.020537	0.015476	445	0	0
474	MSTRG.107600.1	Chr13	0.007369	0.037926	0.127814	0.0338257	0	983	816	828
475	MSTRG.107608.1	Chr13	0	0.121728	0	0.0170007	0	252	0	0
476	MSTRG.107631.1	Chr13	0.411909	0.554664	0.47873	0.419236	0.15465	513	252	315
477	MSTRG.107632.1	Chr13	0	0.0701847	0	0.0119017	0	251	72	96
478	MSTRG.107654.1	Chr13	0.0960367	0.138467	0	0.0636073	0	464	60	204
479	MSTRG.107655.1	Chr13	0.240489	0.214562	0.151482	0.294916	0.0101153	515	324	360
480	MSTRG.107791.23	Chr13	0.356986	0	0.071859	0	0.146201	339	0	0
481	MSTRG.107792.1	Chr13	0	0.071008	0	0.104441	0	432	0	0
482	MSTRG.107865.1	Chr13	0	0	0	0.167466	0	366	24	57
483	MSTRG.107868.1	Chr13	0.352979	0.482032	1.52267	0.9994	0.341079	323	54	66
484	MSTRG.107906.1	Chr13	0.223063	0	0.0343237	0	0	448	24	129
485	MSTRG.107942.1	Chr13	0.0388837	0	0.014231	0.022251	0.122313	404	243	249
486	MSTRG.107948.1	Chr13	0.559468	1.0164	0.888202	1.14374	0.394292	1293	108	333
487	MSTRG.10795.2	Chr01	0.061141	0	0	0	0	494	153	297
488	MSTRG.107964.1	Chr13	1.6343	1.89801	1.16338	1.75048	2.52978	1168	0	96
489	MSTRG.107966.1	Chr13	0.388216	0.444576	0.18476	0.242484	1.30616	235	72	81
490	MSTRG.108039.1	Chr13	0.144225	0	0	0	0	247	12	93
491	MSTRG.108042.2	Chr13	0.051982	0.030647	0.111272	0.0103153	0	514	99	216
492	MSTRG.108062.5	Chr13	0	0.311577	0	0.711064	0.047431	1763	288	519
493	MSTRG.108064.1	Chr13	0	0	0	0.150937	0	316	0	0
494	MSTRG.108073.1	Chr13	0.232971	0.004693	0.00456633	0	0	635	177	198
495	MSTRG.108074.2	Chr13	0.157826	0.00513467	0	0	0	1327	990	1170
496	MSTRG.108074.3	Chr13	0.132085	0.129247	0	0	0	940	123	234
497	MSTRG.108074.4	Chr13	0.0750517	0.0246287	0	0.0600693	0	1684	213	306
498	MSTRG.108074.5	Chr13	0.0792057	0	0	0	0	609	261	372
499	MSTRG.108074.6	Chr13	0.159869	0.101393	0	0	0	1417	1173	1263
500	MSTRG.108083.7	Chr13	0.0330457	0.284477	0.152593	0.353547	0.118829	1393	591	642
501	MSTRG.108094.1	Chr13	0.146943	0	0	0	0	480	0	39
502	MSTRG.108094.2	Chr13	0.23495	0	0	0	0	537	0	15
503	MSTRG.108116.1	Chr13	0.070778	0	0	0	0	202	27	45
504	MSTRG.108119.1	Chr13	0.192556	0.212104	0.02694	0.323048	0.029296	693	0	24
505	MSTRG.108119.2	Chr13	0.0479563	0.316394	0.0317363	0.204982	0.00981767	327	0	0
506	MSTRG.108127.1	Chr13	1.00461	0.27382	0.280843	0.425954	0.389733	440	210	216
507	MSTRG.108128.1	Chr13	0.165414	0	0	0	0	346	87	108
508	MSTRG.108129.1	Chr13	0.0887917	0	0	0	0	404	213	249
509	MSTRG.10813.2	Chr01	2.07017	4.25165	1.04257	1.51404	0	1155	555	594
510	MSTRG.108211.1	Chr13	0.0141903	0.062644	0.01503	0	0	226	0	0
511	MSTRG.108219.1	Chr13	0.224703	0.00760967	0	0	0.00200667	437	27	72
512	MSTRG.108221.1	Chr13	0.114919	0	0	0	0	338	0	9
513	MSTRG.108238.3	Chr13	0.162735	0	0	0	0	221	0	63
514	MSTRG.108239.1	Chr13	0.106678	0.00985433	0	0	0	558	375	387
515	MSTRG.108252.1	Chr13	0	0	0	0.069886	0	274	0	0
516	MSTRG.108301.1	Chr13	3.67843	5.15427	5.54068	5.89826	1.2675	1018	531	621
517	MSTRG.108319.1	Chr13	0	0	0	0.090787	0	305	0	0
518	MSTRG.108347.1	Chr13	0	0	0	0.12413	0	296	21	102
519	MSTRG.108360.2	Chr13	0.137514	0	0	0	0	263	87	108
520	MSTRG.108371.1	Chr13	0.0862537	0	0	0	0	220	0	0
521	MSTRG.108390.1	Chr13	0.00746933	0	0.0573663	0	0	451	39	96
522	MSTRG.10845.1	Chr01	2.7528	0.404946	0.942092	1.58235	0.194054	3568	402	501
523	MSTRG.10845.2	Chr01	0.427702	0	0	0	0	3106	279	378
524	MSTRG.108493.1	Chr13	0.157531	0.0648727	0.136774	0.1381	0.0915963	593	0	0
525	MSTRG.1085.1	Chr00	0.191878	0.0361777	0	0.0602983	0	515	333	360
526	MSTRG.1085.2	Chr00	0	0.115247	0	0.069512	0	342	180	186
527	MSTRG.108553.1	Chr13	0.0328717	0	0.170688	0	0.00622233	861	261	261
528	MSTRG.108599.3	Chr13	0	0.140859	0.000948667	0.0186387	0.86152	7161	6897	7005
529	MSTRG.108611.1	Chr13	0.0529013	0.0352577	0.0297127	0	0	387	222	222
530	MSTRG.108625.1	Chr13	0	0.0309017	0	0.209613	0	422	198	228
531	MSTRG.108628.1	Chr13	0.272112	0.440514	0.588556	0.19521	0.109825	400	78	246
532	MSTRG.108629.1	Chr13	0.326911	0.612921	0.302579	0.46683	0.126006	579	75	255
533	MSTRG.108631.1	Chr13	0.304802	0.213565	0.32867	0.138878	0.039337	276	0	0
534	MSTRG.108632.1	Chr13	0	0.0451887	0.0462857	0.0235357	0	207	0	0
535	MSTRG.108688.1	Chr13	0.305566	0.12684	0.385027	0.166861	0.194559	383	0	27
536	MSTRG.108689.1	Chr13	0.142892	0	0	0	0	348	0	0
537	MSTRG.108690.1	Chr13	0.254935	0	0	0	0	530	114	213
538	MSTRG.108717.1	Chr13	0	0	0.0171557	0	0.173006	441	0	138
539	MSTRG.108725.1	Chr13	0	0.0519003	0.0110747	0	0	274	0	0
540	MSTRG.108751.1	Chr13	0.131118	0.00848567	0	0.024737	0	723	363	543
541	MSTRG.108775.1	Chr13	2.16433	0	0.767156	0	1.28462	657	195	225
542	MSTRG.108819.1	Chr13	0	0	0.00813167	0.005631	0.149958	1145	132	180
543	MSTRG.108834.2	Chr13	0	0	1.83333e-05	0.0933437	0	868	360	714
544	MSTRG.108834.3	Chr13	0.00761433	0.0409217	0.144372	0.0422083	0.0652083	919	603	735
545	MSTRG.108885.1	Chr13	0.00647067	0.0573717	0.003741	0	0.004601	227	0	60
546	MSTRG.108898.1	Chr13	0.0788657	0.0117357	0.00259767	0.0271247	0	210	0	54
547	MSTRG.108898.2	Chr13	0.421013	0.051531	0.503579	0.0209383	0.165839	497	45	219
548	MSTRG.108905.1	Chr13	0.0419257	0.105705	0.0859853	0.0679847	0	299	129	144
549	MSTRG.108908.1	Chr13	0	0	0	0.075857	0	221	0	66
550	MSTRG.10891.1	Chr01	0.057515	0.0413937	0	0.157159	0	213	0	0
551	MSTRG.108921.2	Chr13	0	0	0	0	0.0660023	638	318	426
552	MSTRG.108958.8	Chr13	0.471118	0.479815	0.451356	0.025116	0	4367	648	765
553	MSTRG.108959.1	Chr13	0	0.137379	0	0.0168513	0.05506	627	126	261
554	MSTRG.108980.1	Chr13	0.239341	0.26471	0.231634	0.126676	0	609	390	453
555	MSTRG.108993.1	Chr13	0.0804943	0	0	0	0	251	6	96
556	MSTRG.109014.1	Chr13	0.116308	0.0185893	0.0112733	0.0617387	0.022614	510	162	192
557	MSTRG.109032.1	Chr13	0	0.0685303	0	0.847532	0	949	726	756
558	MSTRG.109035.1	Chr13	0.269926	0.108442	0.201834	0.0418563	0	747	429	549
559	MSTRG.109036.1	Chr13	0.550559	0.410843	0.487489	0.480922	0.125889	693	300	432
560	MSTRG.109081.5	Chr13	0.618828	0.831166	0.991395	0.857438	0.273516	2250	1746	1869
561	MSTRG.109096.15	Chr13	0.215135	0.435515	0.3251	0.766311	0.388623	1263	75	294
562	MSTRG.1091.1	Chr00	0.061673	0	0	0	0	208	0	51
563	MSTRG.10915.1	Chr01	0.255236	0	0.0608343	0	0.116375	218	0	0
564	MSTRG.109152.1	Chr13	0.00477233	1.93744	0	1.19496	0.00858133	336	0	0
565	MSTRG.109152.2	Chr13	0	2.14425	0	0.842295	0	333	0	0
566	MSTRG.109152.3	Chr13	0	0.136089	0	0.11218	0	301	0	0
567	MSTRG.109153.1	Chr13	0.0206903	2.71205	0.031935	0.822362	0.014121	589	120	120
568	MSTRG.109161.1	Chr13	0.0167857	0	0	0.062886	0	203	0	0
569	MSTRG.109203.2	Chr13	0.808318	0.374865	1.04764	0.644973	0.164359	1809	0	27
570	MSTRG.109204.1	Chr13	0.0854027	0.0670213	0.0459537	0.0169983	0.015329	807	594	642
571	MSTRG.109213.49	Chr13	0.0954123	0.000753	0.121204	0.0116303	0.025703	3125	696	819
572	MSTRG.109214.1	Chr13	0.076641	0.138816	0.0633877	0.144609	0.045646	526	267	297
573	MSTRG.109216.1	Chr13	0.156877	0.123475	0.156061	0.151684	0.0949143	372	6	12
574	MSTRG.109220.1	Chr13	0.16421	0.159582	0.159771	0.145945	0.0590843	409	120	150
575	MSTRG.109279.12	Chr13	0.013191	0.162814	0.101517	0.423277	0	458	198	297
576	MSTRG.109280.1	Chr13	0	0	0	0.336816	0	261	36	105
577	MSTRG.109301.1	Chr13	0	0.0146627	0	0.0736	0	243	0	18
578	MSTRG.109331.2	Chr13	0.16502	0.00903633	0	0	0	645	117	201
579	MSTRG.10934.1	Chr01	0.00862833	0.0597143	0	0.00218533	0.010965	218	0	36
580	MSTRG.109352.1	Chr13	0	0.170768	0	0.161413	0	210	0	54
581	MSTRG.109357.2	Chr13	0	0.0218837	0.00377267	0.255072	0	1863	153	222
582	MSTRG.109367.1	Chr13	0.0543127	0	0.135551	0.0200983	0.00679	1709	0	177
583	MSTRG.109367.3	Chr13	0.0960117	0	0.204226	0	0	1253	0	168
584	MSTRG.109367.4	Chr13	0	0	0.124806	0	0	1384	576	711
585	MSTRG.109367.5	Chr13	0.12407	0	0.214653	0	0	517	0	129
586	MSTRG.109386.1	Chr13	0	1.16114	0	0.759318	0.024495	850	312	348
587	MSTRG.109412.2	Chr13	0	0.116644	0.0279723	0.044992	0	972	81	207
588	MSTRG.109412.3	Chr13	0	0.172943	0.029674	0.01648	0	595	60	159
589	MSTRG.109420.1	Chr13	0	0.385288	0.244487	0.621328	0	270	0	0
590	MSTRG.109421.1	Chr13	0	8.24146	0.0647213	0.137105	0.00629833	2234	1749	1851
591	MSTRG.109421.2	Chr13	0.0141653	1.91846	0.0282617	0	0	2264	1779	1881
592	MSTRG.109421.3	Chr13	0	0	0	1.07597	0	301	0	0
593	MSTRG.109423.2	Chr13	0.00923667	0.479929	0.0176343	0	0.011133	1926	1383	1431
594	MSTRG.109462.1	Chr13	0.207962	0	0	0	0	369	99	213
595	MSTRG.109464.1	Chr13	0.677811	1.1723	0.742537	1.72767	0.209616	865	405	471
596	MSTRG.109464.2	Chr13	0.0596187	0.301263	0.0744093	0.65672	0.032575	792	309	330
597	MSTRG.109464.3	Chr13	0.059233	0.0132487	0.006685	0.445878	0.016328	784	330	396
598	MSTRG.109464.4	Chr13	0	0.187566	3.33333e-06	0.636806	0	785	303	324
599	MSTRG.109464.5	Chr13	0.260863	0.908667	0	0	0	779	318	384
600	MSTRG.109464.6	Chr13	0	0.087125	0	0	0	769	297	318
601	MSTRG.109464.7	Chr13	0.285195	0	0.0750737	0	0.041784	490	0	0
602	MSTRG.109487.2	Chr13	0.0614157	0.173917	0.0100347	0.541369	0.0177467	677	0	0
603	MSTRG.109497.1	Chr13	0.00491333	0.340258	0.00781167	0.250731	0.013817	644	0	39
604	MSTRG.109497.2	Chr13	0	1.14809	0	0.597703	0	544	0	57
605	MSTRG.109500.1	Chr13	0	0.446382	0.0216363	0.180929	0	449	96	189
606	MSTRG.109525.1	Chr13	0.103862	0	0.008365	0	0	1379	696	759
607	MSTRG.109525.2	Chr13	0.327347	0	0	0	0	390	132	213
608	MSTRG.109532.1	Chr13	0.032141	0.0144303	0.176186	0	0	253	0	0
609	MSTRG.109532.2	Chr13	0.0845017	0	0.0213187	0.0879197	0	465	237	312
610	MSTRG.109535.1	Chr13	0	1.80295	0.0125807	0.289337	0	270	0	114
611	MSTRG.109535.2	Chr13	0	0.343394	0	0.169075	0	225	0	69
612	MSTRG.109535.3	Chr13	0	1.9095	0	0.251707	0	429	0	114
613	MSTRG.109568.1	Chr13	0	0	0.068565	0	0	251	9	81
614	MSTRG.109568.2	Chr13	0.272335	0.293048	0.136907	0.078749	0.0404233	284	45	114
615	MSTRG.1096.1	Chr00	0.180862	0.0861413	0.0381153	0	0.0157447	717	495	552
616	MSTRG.109605.1	Chr13	0.040019	0.170046	0.0297127	0.0800787	0	387	0	0
617	MSTRG.109616.10	Chr13	0	0.165999	0	0	0	1733	306	438
618	MSTRG.109616.3	Chr13	0	0.1152	0	0	0	1213	321	453
619	MSTRG.109616.5	Chr13	0	0.217965	0.00465567	0	0	1226	693	777
620	MSTRG.109616.7	Chr13	0	0.051128	0	0	0	1193	321	453
621	MSTRG.109616.8	Chr13	0	0.044676	0	0	0	1199	546	669
622	MSTRG.109638.1	Chr13	0.347037	1.3105	0.496116	0.848215	0.153801	1092	519	576
623	MSTRG.109638.17	Chr13	0.421939	4.63996	0.674103	1.94153	0.0957033	964	495	552
624	MSTRG.109638.20	Chr13	0.321676	2.13395	0.18235	0.71146	0.280006	1055	654	888
625	MSTRG.109638.24	Chr13	0.685797	5.33112	1.0203	4.27236	0.271212	641	0	0
626	MSTRG.109657.1	Chr13	0	0.091173	0.00546867	0.118993	0	242	0	0
627	MSTRG.109669.1	Chr13	0.095826	0	0.130851	0	0	739	360	387
628	MSTRG.109684.1	Chr13	0	0.267303	0	0.234548	0	418	0	0
629	MSTRG.109685.1	Chr13	0	0	0	0.128127	0	225	0	0
630	MSTRG.10972.1	Chr01	0.00366533	0.0731273	0.019842	0.007944	0	225	0	12
631	MSTRG.109728.1	Chr13	0.188319	0	0	0	0	227	48	51
632	MSTRG.109738.1	Chr13	0	0.054654	0	0	0	207	9	51
633	MSTRG.109748.1	Chr13	0.208128	0	0	0	0	1214	918	1059
634	MSTRG.109748.2	Chr13	0.250847	0	0.041131	0	0	1656	1419	1503
635	MSTRG.109809.1	Chr13	0.48812	0.231306	0.412288	0.19856	0.107025	688	288	318
636	MSTRG.10981.1	Chr01	0.0735407	0	0	0	0	263	39	108
637	MSTRG.109816.1	Chr13	0.0634657	0	0.000746667	0	0	231	0	0
638	MSTRG.109817.1	Chr13	0.1486	0	0.043565	0	0	262	0	87
639	MSTRG.109822.1	Chr13	0.440668	0.0210373	0.109996	0	0	1134	789	888
640	MSTRG.109822.2	Chr13	0.0571927	0.009763	0.00254767	0	0	895	399	495
641	MSTRG.109822.3	Chr13	0.172462	0	0	0	0	667	198	354
642	MSTRG.109834.1	Chr13	0	0.0880087	0	0.0413267	0	240	33	42
643	MSTRG.10984.1	Chr01	0	0.170419	0	0	0	216	0	0
644	MSTRG.109875.1	Chr13	0.013348	0	0.244759	0	0	483	99	183
645	MSTRG.109906.1	Chr13	0.481207	0.180529	0.129171	0.0796523	0	1747	804	843
646	MSTRG.109937.1	Chr13	0	0.131505	0	1.19357	0	343	0	51
647	MSTRG.109941.1	Chr13	0	0.263551	0.0106433	0.351274	0	810	0	0
648	MSTRG.109956.1	Chr13	0.45821	0	0.002529	0	0	3719	1836	2001
649	MSTRG.109956.2	Chr13	0.12293	0	0	0	0	3221	1683	1812
650	MSTRG.109956.3	Chr13	0.088217	0	0	0	0	2393	1836	2001
651	MSTRG.109956.4	Chr13	0.261576	0	0	0	0	2403	1437	1602
652	MSTRG.109957.1	Chr13	0.350229	0	1.22221	0	0.0535377	385	0	0
653	MSTRG.109963.2	Chr13	0	0.0343323	0.291042	0	0	631	0	141
654	MSTRG.109975.1	Chr13	0.072945	0	0	0	0.223129	2023	393	450
655	MSTRG.110039.1	Chr13	0.080623	0	0	0	0	266	0	0
656	MSTRG.110054.1	Chr13	0	0	0	0.057824	0	223	15	69
657	MSTRG.110055.1	Chr13	0.050569	0.140286	0	0.056276	0	329	78	174
658	MSTRG.110055.3	Chr13	0.0338767	0.253776	0.0986753	0.877332	0.06176	3137	0	243
659	MSTRG.110055.6	Chr13	0.394628	0.162373	0.562144	0.698234	5.13333e-05	3217	420	564
660	MSTRG.110055.7	Chr13	0	0	0.193286	0	0	2469	312	480
661	MSTRG.110067.1	Chr13	0	0.586677	0	0	0	284	0	0
662	MSTRG.110072.1	Chr13	0.220984	0.036491	0.123387	0.00991367	0.0834557	265	0	30
663	MSTRG.110083.1	Chr13	0	0	0.208777	0	0	277	0	0
664	MSTRG.110083.2	Chr13	0	0.0624943	0.282195	0	0	1282	732	888
665	MSTRG.110092.1	Chr13	2.07748	1.66799	1.84522	1.80081	1.03071	1389	993	1080
666	MSTRG.110110.1	Chr13	0	0.107911	0	0	0	202	0	0
667	MSTRG.110129.1	Chr13	0.241973	0	0.010958	0	0	413	0	72
668	MSTRG.110134.1	Chr13	0.0348453	0	0.027134	0	0.265927	963	321	447
669	MSTRG.110140.1	Chr13	0.123881	0.180814	0	0.361924	0.012407	220	51	57
670	MSTRG.110144.6	Chr13	0.150974	0.100224	0.10327	0.133198	0.0178257	2393	1971	2238
671	MSTRG.110144.7	Chr13	0.184119	0.131752	0.0950447	0.20046	0.149179	3234	2958	3081
672	MSTRG.110144.8	Chr13	0.170995	0.201008	0.310537	0.185785	0.0467763	1650	1272	1443
673	MSTRG.110145.1	Chr13	0.732277	0.570481	1.11109	0.382445	0.026116	488	3	36
674	MSTRG.110145.2	Chr13	0.936199	0.404578	0.840021	0.0633213	0.071848	459	3	36
675	MSTRG.110145.3	Chr13	2.19696	0.600118	0.466358	0.100414	0	477	216	321
676	MSTRG.110145.4	Chr13	1.14715	0	0	0.021833	0	373	114	219
677	MSTRG.110145.5	Chr13	0.85457	0	0	0.069345	0	356	81	201
678	MSTRG.110145.6	Chr13	0.368491	0.274535	0.0236197	0	0	450	81	177
679	MSTRG.110150.1	Chr13	0	0.094803	0	0.0867583	0	280	105	123
680	MSTRG.110150.2	Chr13	0	0.070338	0	0.0924907	0	263	3	105
681	MSTRG.110198.1	Chr13	0	0.0338963	0	0.119129	0	217	0	24
682	MSTRG.110207.12	Chr13	0.126428	0.0889707	0.210423	0.0411073	0.0436297	1499	279	318
683	MSTRG.110225.1	Chr13	0.0660673	0.169854	0.104109	0.172351	0.0268097	959	516	621
684	MSTRG.110251.1	Chr13	0	0	0.104166	0	0	220	0	66
685	MSTRG.110261.3	Chr13	0.0287073	0.0984797	0.254818	0.0185667	0.0805847	1652	1362	1446
686	MSTRG.110261.6	Chr13	0.125758	0.184089	0.130254	0.163833	0.227446	1349	1050	1134
687	MSTRG.110262.1	Chr13	0	0	0.158084	0	0.0177807	211	39	45
688	MSTRG.110264.1	Chr13	0.0872507	0	0.143199	0.137381	0.0544577	255	0	0
689	MSTRG.110287.1	Chr13	0	0.171844	0	0.591566	0	1634	1233	1299
690	MSTRG.110287.2	Chr13	0	0.137684	0	0.193451	0	915	516	582
691	MSTRG.110287.3	Chr13	0	0.0241557	0	0.110503	0	974	576	642
692	MSTRG.110321.1	Chr13	0.0451313	0.0173047	0	0.147417	0	251	0	96
693	MSTRG.110322.1	Chr13	0.42187	0.419815	0.0193133	0.40448	0.101329	551	0	0
694	MSTRG.110322.2	Chr13	0.06393	0.302436	0.138741	0.316637	0	536	0	0
695	MSTRG.110334.1	Chr13	0.301292	0	0	0	0	353	0	0
696	MSTRG.110350.1	Chr13	0.0208623	0.0839803	0	0.241837	0	308	0	18
697	MSTRG.110405.1	Chr13	4.83717	6.22098	3.41553	4.59985	4.17495	1250	795	930
698	MSTRG.110405.2	Chr13	0.458904	0.75643	0.524014	0.676005	0.386327	2486	795	894
699	MSTRG.110405.3	Chr13	1.61745	1.72371	1.65995	2.06738	0.971181	2137	567	702
700	MSTRG.110407.1	Chr13	0	0.685844	0.006791	0.823344	0	1834	837	957
701	MSTRG.110408.2	Chr13	0	0.095157	0	0	0	1676	54	90
702	MSTRG.110412.1	Chr13	0.154572	0.0911167	0.213088	0.0707913	0	364	0	0
703	MSTRG.110423.11	Chr13	0.175003	0.225282	0.0905423	0.0309567	0.0790537	1111	885	954
704	MSTRG.110423.12	Chr13	0.197792	0.0996367	0.112916	0.0755783	0.0661717	1444	1206	1287
705	MSTRG.110423.14	Chr13	1.39376	0.316777	0.651494	0.319134	0.500913	998	771	843
706	MSTRG.110423.15	Chr13	0.402729	0.341174	0	0	0.221472	2714	2454	2559
707	MSTRG.110423.16	Chr13	0.0577377	0.0588773	0.0732083	0.04916	0.137351	1468	1275	1314
708	MSTRG.110423.18	Chr13	0.080274	0	0.0233157	0	0.0350153	1824	1632	1671
709	MSTRG.110423.19	Chr13	0.191332	0.082654	0.058909	0.004744	0.0659823	1356	1104	1200
710	MSTRG.110423.20	Chr13	0.038716	0.049043	0.0181463	0.0188113	0.019434	2453	2184	2298
711	MSTRG.110423.21	Chr13	0.0985403	0.054427	0.142883	0.0885327	0.0526683	2682	2418	2529
712	MSTRG.110423.22	Chr13	0.141251	0.052489	0.162017	0.0384453	0.0743747	1408	1128	1254
713	MSTRG.110423.8	Chr13	0	0.144112	0.125506	0.237016	0.15883	1870	1590	1716
714	MSTRG.110434.1	Chr13	0.123246	0.0333477	0.467471	0	0.128603	771	0	0
715	MSTRG.110434.2	Chr13	0.112811	0	0	0	0	340	0	0
716	MSTRG.110437.1	Chr13	0	4.72528	0	1.25429	0	787	189	324
717	MSTRG.110437.2	Chr13	0.0569127	3.60099	0.183354	8.618	0.0224033	395	201	240
718	MSTRG.110438.1	Chr13	0.46494	0	0	0	0	327	96	150
719	MSTRG.110479.1	Chr13	0.0630557	0	0.0659563	0	0	206	0	51
720	MSTRG.110503.1	Chr13	0.0809983	0	0	0	0	819	60	249
721	MSTRG.110508.5	Chr13	0	0	0	0	0.181181	283	0	111
722	MSTRG.110508.6	Chr13	0	0.109809	0	0.0825603	0.056065	672	300	447
723	MSTRG.110557.1	Chr13	0.0128647	0.184282	0	0	0	467	126	225
724	MSTRG.110609.1	Chr13	0	0.0117083	0.009014	0.082515	0	262	0	0
725	MSTRG.110622.1	Chr13	0	0	0	0.105383	0.0208057	233	0	24
726	MSTRG.110627.1	Chr13	0.007941	0	0	0.473803	0	1072	486	531
727	MSTRG.110628.2	Chr13	0	0	0	0.132631	0	1467	279	345
728	MSTRG.110634.1	Chr13	0.0786527	0.24889	0.01183	0.0300457	0.0227937	486	234	333
729	MSTRG.110669.1	Chr13	0.070565	0	0	0	0	249	0	0
730	MSTRG.110696.4	Chr13	0.888473	1.17486	0.0784027	0.633872	0.001657	2767	2223	2355
731	MSTRG.110697.1	Chr13	0.116536	1.30548	0.174752	1.20461	0.022552	585	9	54
732	MSTRG.110704.1	Chr13	0	0	0	0.071839	0	356	51	54
733	MSTRG.110742.2	Chr13	0	0	0	0	0.0452683	235	0	0
734	MSTRG.110742.3	Chr13	0	0.0343887	0	0	0.026961	369	0	0
735	MSTRG.110744.3	Chr13	0.630501	0.105609	0.0119667	0	0	1564	999	1140
736	MSTRG.110766.2	Chr13	0	0.195015	0.0101127	0.044993	0.09457	930	588	741
737	MSTRG.110767.1	Chr13	0.447218	0.697936	0.593946	0.331897	0.269784	323	165	168
738	MSTRG.110773.1	Chr13	0	0.132177	0.050207	0.105808	0	227	0	0
739	MSTRG.110848.4	Chr13	0	0.133031	0	0	0	3386	21	315
740	MSTRG.110848.5	Chr13	0.0739197	0.046308	0	0	0	453	249	297
741	MSTRG.110850.1	Chr13	0	0	0.043589	0.06151	0	213	0	0
742	MSTRG.110854.1	Chr13	0.0891527	0	0	0	0	359	0	0
743	MSTRG.110854.2	Chr13	0.106416	0	0	0	0	385	168	219
744	MSTRG.110857.1	Chr13	0.00723967	0.217476	0.00158433	0.549104	0.0352873	2144	294	630
745	MSTRG.110874.1	Chr13	0	0.325896	0.0108493	0.0807243	0.051176	311	6	117
746	MSTRG.110894.1	Chr13	0	0.073917	0	0	0	332	60	177
747	MSTRG.110900.1	Chr14	0.154729	0.0458883	0	0	0	300	138	144
748	MSTRG.110912.2	Chr14	0.13262	0.0991247	0	0.009768	0	507	282	351
749	MSTRG.110912.3	Chr14	0.149467	0	0	0	0	627	228	276
750	MSTRG.110915.2	Chr14	0.157965	0.124068	0.141942	0.0331597	0.132302	3016	2781	2856
751	MSTRG.110915.3	Chr14	0.224007	0.0693483	0.188753	0.0157423	0.0217453	1904	1671	1746
752	MSTRG.110915.4	Chr14	0.240929	0.05146	0.155576	0.114861	0.11999	1407	1194	1251
753	MSTRG.110959.2	Chr14	0.161477	0	0	0	0	639	123	237
754	MSTRG.110976.1	Chr14	0.0842877	0	0.234575	0.028559	0.159974	542	21	132
755	MSTRG.11104.1	Chr01	0	1.03979	0.162875	0.717345	0	428	66	210
756	MSTRG.111043.1	Chr14	0	0.0729267	0	0	0	260	18	18
757	MSTRG.11105.1	Chr01	0	0.649452	0	0.567524	0	255	0	102
758	MSTRG.111078.2	Chr14	0.440619	0.108952	0.147888	0.203801	0.030958	2134	39	228
759	MSTRG.111078.3	Chr14	0	0	0.191949	0	0.0546217	1453	333	438
760	MSTRG.111078.4	Chr14	0	0	0.136015	0	0.0390037	1208	333	438
761	MSTRG.1111.2	Chr00	0	0	0.624002	0	0	1344	1068	1188
762	MSTRG.1111.3	Chr00	0.0162007	0	0.191949	0	0	1765	414	522
763	MSTRG.111101.1	Chr14	0.0579467	0	0.00343733	0	0.005839	224	54	69
764	MSTRG.111149.4	Chr14	0.0527707	0.151614	0.0635597	0	0	761	261	282
765	MSTRG.111190.1	Chr14	0.56702	0	0	0	0	581	153	426
766	MSTRG.111256.4	Chr14	0.135944	0	0	0	0	829	585	672
767	MSTRG.111272.3	Chr14	0	0.105622	0	0.0482043	0	361	132	180
768	MSTRG.111462.1	Chr14	0.130322	0.000202	0.0518263	0.0934737	0	746	531	534
769	MSTRG.111473.3	Chr14	0	0.0599847	0.00756733	0.0773187	0.006899	499	81	120
770	MSTRG.111473.4	Chr14	0	0.141434	0	0.158941	0	512	276	309
771	MSTRG.11156.1	Chr01	0.0117687	0.0773233	0.0571543	0	0	545	54	207
772	MSTRG.111586.1	Chr14	0.061378	0	0	0	0	209	0	0
773	MSTRG.111587.1	Chr14	0.0557693	0	0	0	0	401	126	246
774	MSTRG.111591.2	Chr14	0.612915	0.477292	0.414701	0.380786	0.290498	737	99	294
775	MSTRG.111658.1	Chr14	0.00106267	0.458967	0.0468737	0.0927787	0	1329	390	471
776	MSTRG.111667.2	Chr14	0	0	0	0	0.086597	936	468	546
777	MSTRG.111727.1	Chr14	0.702348	0.697918	0.908554	1.82596	0.121454	589	285	417
778	MSTRG.111788.1	Chr14	0.380389	0.0282517	0.00603333	0.0187377	0	563	117	231
779	MSTRG.111790.1	Chr14	0.655986	0.0139923	0.904179	0	0.372963	1455	1263	1299
780	MSTRG.111792.1	Chr14	0.451483	0.547691	1.07509	0.539651	0.148511	485	249	276
781	MSTRG.111811.1	Chr14	0	0	0.054601	0	0	212	0	0
782	MSTRG.11183.1	Chr01	0.0275077	0.28019	0.0183243	0.177365	0	1538	594	699
783	MSTRG.111853.2	Chr14	0.052176	0.074467	0.0883203	0.027466	0.00465167	305	0	21
784	MSTRG.111892.1	Chr14	0.798493	0.00430633	0.662191	0	0.314825	3838	132	219
785	MSTRG.111903.1	Chr14	0	0.066139	0	0.0677817	0.0545943	502	39	120
786	MSTRG.111930.1	Chr14	0	0.0121067	0.015616	0.00492933	0.143063	327	33	135
787	MSTRG.11194.2	Chr01	0.312329	0.00539233	0	0	0	840	648	687
788	MSTRG.111951.1	Chr14	0.228378	0.28058	0.297982	0.0657803	0.110096	1950	237	351
789	MSTRG.111958.1	Chr14	0	0.00343	0.0152103	0.147867	0	1163	675	840
790	MSTRG.112034.1	Chr14	0	0.072397	0	0	0	218	51	63
791	MSTRG.112041.1	Chr14	0.146312	0.0387567	0.00937833	0.0624657	0	496	135	342
792	MSTRG.112049.1	Chr14	0.02118	0.152455	0	0.016498	0	459	0	54
793	MSTRG.112050.2	Chr14	0.265671	0.211372	0.294314	0.042987	0.0939167	872	402	405
794	MSTRG.112050.3	Chr14	0.53293	0.434605	0.574203	0.422356	0.261009	1494	291	519
795	MSTRG.112050.4	Chr14	0.132016	0	0.213842	0	0.0370603	1018	444	486
796	MSTRG.112050.6	Chr14	0	0.186781	0.0591807	0.0588893	0	443	69	288
797	MSTRG.112051.1	Chr14	0.580218	0.326779	0.593881	0.225233	0.241457	1303	939	1080
798	MSTRG.112069.1	Chr14	0	0	0	0.14223	0	204	0	0
799	MSTRG.112101.1	Chr14	0	0	0.072649	0	0	239	0	0
800	MSTRG.112150.1	Chr14	0.113773	0.0785533	0.052264	0.057667	0.0124797	459	201	231
801	MSTRG.112151.2	Chr14	0.0240103	0	0.0819383	0	0	212	0	57
802	MSTRG.112162.1	Chr14	0.111955	0.199535	0.0511807	0.141967	0.049011	390	162	234
803	MSTRG.112163.1	Chr14	0.143418	0	0.0162737	0.0242403	0	232	54	75
804	MSTRG.112167.1	Chr14	0	0.0500567	0.258251	0.260591	0.060505	306	0	0
805	MSTRG.112172.2	Chr14	0	0.208253	0	0	0	2269	2043	2115
806	MSTRG.112238.1	Chr14	0.0167473	0.0942073	0.0571747	0.0658777	0.0561833	827	390	474
807	MSTRG.112240.1	Chr14	0	0.197301	0.309146	0.113904	0.0287127	378	0	117
808	MSTRG.112241.1	Chr14	0.0343807	0.062633	0.0193873	0.117442	0	491	150	267
809	MSTRG.112287.1	Chr14	0.005006	0.0319527	0.023578	0.124046	0	714	0	0
810	MSTRG.11229.1	Chr01	0.0609203	0.00719233	0.000840667	0.100757	0	261	0	0
811	MSTRG.1123.1	Chr00	0.145825	0	0	0	0	220	0	0
812	MSTRG.112342.1	Chr14	0.0671113	0.142679	0.121352	0.216261	0.020437	272	0	0
813	MSTRG.112351.1	Chr14	0	0	0	0.238438	0	224	0	39
814	MSTRG.112353.1	Chr14	0.18164	0	0	0	0	690	297	456
815	MSTRG.112368.1	Chr14	0	0	0	0	0.0743617	291	12	45
816	MSTRG.11237.1	Chr01	0.11043	0	0	0	0	323	21	33
817	MSTRG.11237.3	Chr01	0.190531	0.046226	0.00403733	0.0332827	0	1424	654	774
818	MSTRG.112382.3	Chr14	0.066809	0.321127	0	0.757132	0	321	138	141
819	MSTRG.112394.1	Chr14	0	6.04281	0	1.2731	0.063572	238	0	0
820	MSTRG.1124.1	Chr00	0.539654	0	0	0	0	1306	729	816
821	MSTRG.112407.1	Chr14	0.586254	0	0.302134	0.0137343	0.0853673	302	0	120
822	MSTRG.112419.1	Chr14	0.812244	0.727328	0.798183	0.662034	0.323605	574	15	186
823	MSTRG.112430.4	Chr14	0	0	0	0	0.0559657	542	12	258
824	MSTRG.112454.1	Chr14	0.208217	0	0	0	0	315	9	27
825	MSTRG.112496.1	Chr14	0.0963477	0	0	0	0	233	30	69
826	MSTRG.112509.1	Chr14	0	0.598793	0.00458833	1.25287	0	1253	222	288
827	MSTRG.112509.2	Chr14	0	0.429079	0	0.625872	0	1751	222	288
828	MSTRG.112509.3	Chr14	0	0.241688	0	0.0267453	0	457	81	120
829	MSTRG.112509.4	Chr14	0	0.207627	0	0.294559	0	1229	213	279
830	MSTRG.112512.1	Chr14	0.0565043	0.027099	0	0.00623633	0	224	51	69
831	MSTRG.112586.1	Chr14	0	0	0.0926583	0.0170977	0.018275	203	0	3
832	MSTRG.112618.1	Chr14	0.0140767	0	0.156165	0.011553	0	458	0	102
833	MSTRG.112648.2	Chr14	0	0.811144	0.0131903	0.643853	0.007518	648	18	24
834	MSTRG.112648.3	Chr14	0	0.411463	0	0.409304	0.0126513	519	18	24
835	MSTRG.112692.1	Chr14	0.177885	0.020256	0.163168	0.137111	0.0268213	215	15	60
836	MSTRG.112715.1	Chr14	0.109572	0.463915	0.514847	0.0877577	0.105339	856	318	417
837	MSTRG.112715.4	Chr14	0.217944	0.667829	0.447261	0.148323	0.031801	544	0	30
838	MSTRG.11272.1	Chr01	0.536071	0	0.132235	0	0.0600743	385	153	210
839	MSTRG.112758.1	Chr14	0.0611367	0.0882903	0.096986	0.112469	0	419	0	0
840	MSTRG.112764.1	Chr14	0	0.0543393	0	0.104415	0	280	0	0
841	MSTRG.112778.1	Chr14	0.0301667	0	0.342116	0	0	374	0	24
842	MSTRG.112785.1	Chr14	0.043219	0.280624	0.0170163	0.127441	0.018975	258	0	0
843	MSTRG.112789.1	Chr14	0.153125	0	0.263126	0.00261533	0.00510333	303	96	150
844	MSTRG.112875.2	Chr14	0	0	0	0.112165	0	1067	306	420
845	MSTRG.112882.1	Chr14	0.0585243	0.066926	0.00830467	0.159239	0.0117403	660	0	0
846	MSTRG.112891.3	Chr14	0	0.0471083	0	0.009293	0	646	0	0
847	MSTRG.112897.3	Chr14	0	0.152904	0	0.248118	0	303	0	42
848	MSTRG.112908.1	Chr14	0	0.0181367	0	0.153542	0.0905433	1035	150	150
849	MSTRG.11291.2	Chr01	0.15943	0.03317	0.0222797	0	0	248	0	33
850	MSTRG.112941.1	Chr14	0.00595633	0	0.00253933	0.0673607	0.00181567	335	126	180
851	MSTRG.112948.1	Chr14	0.005423	0.0800083	0.0708723	0	0	435	210	222
852	MSTRG.112985.1	Chr14	0.210531	0.220607	0.142541	0.849845	0.280616	924	195	324
853	MSTRG.112986.1	Chr14	0.0992733	0	0.014892	0	0	247	0	27
854	MSTRG.113013.1	Chr14	0.0942983	0	0.0498893	0.039832	0	258	39	102
855	MSTRG.113038.2	Chr14	0.210939	0.397185	0.0881393	0	0.0203113	3864	2274	2373
856	MSTRG.113041.1	Chr14	0.0168037	0.00765067	0.059083	0.000266667	0.0995067	1982	1554	1827
857	MSTRG.113041.10	Chr14	0.0502737	0.304343	0.166618	0.096825	0	968	585	813
858	MSTRG.113041.11	Chr14	0.321646	0.110723	0.381579	0.218706	0	1671	1389	1515
859	MSTRG.113041.12	Chr14	0.087997	0.104473	0.0431147	0.026519	0.00884833	1242	960	1086
860	MSTRG.113041.2	Chr14	0.138597	0.0491217	0.114111	0.0525093	0.06633	1670	1359	1515
861	MSTRG.113041.3	Chr14	0.0726597	0.3569	0.0856023	0.11311	0.0905883	939	570	783
862	MSTRG.113041.6	Chr14	0.0483757	0.056675	0.0461483	0.037564	0.0263767	1515	1092	1359
863	MSTRG.113041.7	Chr14	0.008245	0.0340463	0.0471233	0.225777	0.11636	2310	1995	2157
864	MSTRG.113041.8	Chr14	0.14003	0.3788	0.185501	0.0197797	0.144207	1258	618	897
865	MSTRG.113041.9	Chr14	0.334065	0.20004	0.227005	0.0388477	0.0300757	852	537	699
866	MSTRG.113081.1	Chr14	0.0614673	0	0.021641	0	0	208	0	54
867	MSTRG.113102.1	Chr14	0.0598563	0.00498167	0.0893757	0.00637667	0	249	0	66
868	MSTRG.113118.1	Chr14	0.0455513	0.203138	0.100459	0.068323	0.0124943	220	30	66
869	MSTRG.113127.1	Chr14	0.0661693	0.008653	0.0387243	0	0.022378	1414	117	231
870	MSTRG.113127.2	Chr14	0.0357617	0.078219	0.061185	0.056247	0	3652	51	165
871	MSTRG.113127.3	Chr14	0.0599993	0.0112597	0.0240167	0.0365813	0.0452913	3758	51	165
872	MSTRG.113127.5	Chr14	0	0	0	0.0821447	0	379	174	225
873	MSTRG.113127.6	Chr14	0	0.0507087	0	0	0	810	0	114
874	MSTRG.113128.4	Chr14	0	0.108612	0.0595967	0.0356017	0.0110143	241	42	84
875	MSTRG.113132.1	Chr14	0.190034	0.226305	0.137105	0.151939	0.0462617	639	312	342
876	MSTRG.113134.4	Chr14	0.0158167	0.342361	0.005596	0.130234	0.007672	433	90	207
877	MSTRG.11315.1	Chr01	0.132759	0	0.0139033	0	0	231	0	0
878	MSTRG.113158.2	Chr14	0.0425997	0.0472027	0	0.0219967	0.06505	384	45	129
879	MSTRG.113182.12	Chr14	0.060388	0.022758	0.147516	0	0.000904667	2003	573	711
880	MSTRG.113182.13	Chr14	0.0771223	0	0.189775	0	0	1144	102	342
881	MSTRG.113182.15	Chr14	0.039732	0.024486	0.152895	0	0.0183523	1218	306	444
882	MSTRG.113182.16	Chr14	0.088248	0.0425977	0.0738327	0	0	2017	306	444
883	MSTRG.113182.18	Chr14	0.003816	0.0251233	0.0556733	0.0922533	0	540	90	201
884	MSTRG.113182.19	Chr14	0.133499	0.024145	0.189793	0	0	1468	111	321
885	MSTRG.113182.20	Chr14	0	0	0	0	0.103014	378	93	222
886	MSTRG.113182.8	Chr14	0.0536697	0	0.131057	0	0	1508	105	345
887	MSTRG.113189.5	Chr14	0.182457	0.0765483	0.223804	0	0	1015	696	816
888	MSTRG.113208.1	Chr14	0	0	0	0	0.202567	976	606	693
889	MSTRG.113208.2	Chr14	0	0	0	0	0.156836	871	516	603
890	MSTRG.113213.1	Chr14	0.012777	0.0487223	0.0270657	0.194691	0	502	3	93
891	MSTRG.113252.1	Chr14	0.136858	0	0	0	0	247	0	93
892	MSTRG.11331.1	Chr01	0.0413473	0.0212713	0.039142	0.0354003	0.059261	241	0	0
893	MSTRG.11331.2	Chr01	0.075691	0.0255167	0.016492	0.010015	0	211	0	0
894	MSTRG.113317.2	Chr14	0	0.060954	0	0.137239	0	611	387	456
895	MSTRG.11332.1	Chr01	0.29836	0.043715	0.0520147	0.0264647	0.084078	505	117	147
896	MSTRG.113322.1	Chr14	0.445953	5.41649	0.703133	6.19923	1.11676	1680	1164	1308
897	MSTRG.113322.2	Chr14	0	0	0	0.266991	0.981605	518	231	357
898	MSTRG.113333.1	Chr14	0.022529	0.0101913	0	0.0240437	0.307873	602	258	333
899	MSTRG.113341.1	Chr14	0	0.0655333	0	0	0	217	21	63
900	MSTRG.113350.1	Chr14	0	0.0745727	0	0	0	270	0	0
901	MSTRG.113362.3	Chr14	0.0757943	0	0.000159	0	0.038073	893	93	348
902	MSTRG.113362.7	Chr14	0.389374	0.0260893	0.015334	0	0.0230797	575	300	330
903	MSTRG.113372.1	Chr14	0.0138987	0	0	0.06092	0	225	0	12
904	MSTRG.113375.1	Chr14	0.11225	0.0642373	0.0302533	0	0.00232467	408	48	183
905	MSTRG.113388.5	Chr14	0	0	0	0.0115073	0.105699	1901	462	729
906	MSTRG.113400.1	Chr14	0.580001	0.252532	0.20592	0.355598	0.774624	2971	228	546
907	MSTRG.113400.10	Chr14	0	0.0710613	0.0193363	0.141337	0	1480	444	486
908	MSTRG.113400.13	Chr14	0	0.13396	0.00238767	0.0846813	0	1955	1017	1059
909	MSTRG.113400.15	Chr14	0.0429757	0.0465937	0.00188433	0.0144163	0.074021	1099	231	267
910	MSTRG.113400.16	Chr14	0.0735697	0.0281713	0.212968	0.0591317	0.0704513	2224	705	756
911	MSTRG.113400.17	Chr14	0	0.313369	0.0366497	0.379053	0	1703	315	411
912	MSTRG.113400.18	Chr14	0.242548	0.187982	0.0305763	0.379297	0.243091	1185	231	267
913	MSTRG.113400.2	Chr14	0.090302	0.0199983	0.062123	0.0520553	0.0380763	2422	1431	1452
914	MSTRG.113400.5	Chr14	0.0720043	0.0390623	0.0533533	0.0287663	0.187636	1676	240	324
915	MSTRG.113400.6	Chr14	0	0	0.0900067	0	0.035555	1545	1026	1047
916	MSTRG.113400.7	Chr14	0	0.076217	0.0116107	0.244942	0	1556	243	327
917	MSTRG.113400.8	Chr14	0	0.135811	0.0152697	0.178226	0	1353	318	360
918	MSTRG.113400.9	Chr14	0.0569153	0.0142337	0.072394	0.02733	0.082375	2102	864	885
919	MSTRG.113410.1	Chr14	0	0	0.00801067	0.621485	0	506	249	345
920	MSTRG.113410.2	Chr14	0.00206433	0.926613	0.0149783	1.58937	0	6204	5202	5328
921	MSTRG.113423.1	Chr14	0.0845903	0.0551973	0	0	0	345	0	0
922	MSTRG.113449.1	Chr14	0.133441	0.0390417	0.044007	0	0	213	6	45
923	MSTRG.113461.14	Chr14	0	0.100404	0.0186673	0.0390297	0	4267	2901	3042
924	MSTRG.113461.22	Chr14	0	0	0	0.118179	0.00913467	816	180	198
925	MSTRG.113564.1	Chr14	0.177584	0	0	0	0	637	273	345
926	MSTRG.113598.1	Chr14	0	0.381798	0	0	0	2173	1959	2004
927	MSTRG.113635.1	Chr14	0.149327	0.224098	0.199789	0.0486523	0.0554687	445	270	291
928	MSTRG.113652.4	Chr14	0.002292	0.228087	0	0.001824	0	6534	624	849
929	MSTRG.113652.5	Chr14	0	0.149974	0.00263067	0.007585	0	6471	201	459
930	MSTRG.113683.2	Chr14	0.006879	0.335288	0.00654767	0.144017	0.0237747	591	147	279
931	MSTRG.113705.2	Chr14	0	0	0	0.0416883	0	528	0	102
932	MSTRG.113725.2	Chr14	0.100063	0.022815	0.109816	0.185524	0	1339	912	1065
933	MSTRG.113725.3	Chr14	0	0.0560107	0	0	0	1239	819	972
934	MSTRG.113768.1	Chr14	0.096993	0	0	0	0	394	0	0
935	MSTRG.113776.1	Chr14	0.014592	0.239487	0.00318367	0.251244	0	278	0	0
936	MSTRG.113777.1	Chr14	0.003563	0.0623447	0.053122	0	0	321	0	24
937	MSTRG.113791.1	Chr14	0.229642	0.262023	0.236442	0	0.0110987	365	72	189
938	MSTRG.113825.1	Chr14	14.4623	5.24067	4.24146	4.93186	0.344083	852	195	336
939	MSTRG.113859.1	Chr14	0	0.0604837	0	0	0	265	0	111
940	MSTRG.113873.1	Chr14	0	0.071102	0	0	0	302	0	147
941	MSTRG.113879.4	Chr14	0	0	0	0.0363633	0	508	225	342
942	MSTRG.113879.5	Chr14	0	0.0980123	0	0	0.0279393	813	381	462
943	MSTRG.113884.1	Chr14	0.015127	0.0293953	0.072508	0.0273773	0.20076	471	213	300
944	MSTRG.113884.2	Chr14	0	0	0	0	0.0735007	379	120	207
945	MSTRG.113892.1	Chr14	0.0853507	0.142964	0.00910667	0.0778223	0	1487	816	819
946	MSTRG.113896.1	Chr14	0	0.126838	0	0.106694	0	208	0	0
947	MSTRG.113897.1	Chr14	0	0.219633	0	0.181921	0	233	0	0
948	MSTRG.113897.2	Chr14	0	0	0	0.328938	0	216	0	0
949	MSTRG.113910.2	Chr14	0	4.43034	0	0	0	336	15	180
950	MSTRG.113921.1	Chr14	0.461892	0	0.014848	0.0916793	0	668	66	123
951	MSTRG.113924.1	Chr14	0	0.102962	0	0	0.0443767	243	87	90
952	MSTRG.113975.1	Chr14	0	0	0	0.259205	0.00689533	1057	0	0
953	MSTRG.113976.1	Chr14	0.104594	0	0	0	0	204	27	36
954	MSTRG.114018.2	Chr14	0.191788	0.956055	0.296457	0.742478	0.0627953	812	192	339
955	MSTRG.114065.1	Chr14	0	0.0785767	0	0.0138677	0	846	144	222
956	MSTRG.114079.1	Chr14	0.01292	0.0367613	0.0115217	0.0910983	0	499	228	342
957	MSTRG.114085.2	Chr14	0.0521317	0.209182	0	0	0.00814267	1017	36	237
958	MSTRG.114101.2	Chr14	0.0456043	0.0904373	0.0264533	0.0386677	0.0305777	659	162	240
959	MSTRG.11413.1	Chr01	0.025227	0	0.137134	0.0257553	0	228	0	0
960	MSTRG.114137.1	Chr14	0	0.0104273	0.0774327	0.048817	0	297	0	0
961	MSTRG.114169.12	Chr14	0.126965	0.0771797	0.166057	0.0710453	0.052376	2388	2160	2211
962	MSTRG.114169.14	Chr14	0	0.247752	0.0195007	0.306584	0.0877217	545	312	363
963	MSTRG.114183.2	Chr14	0	0.0593247	0	0.0345437	0	854	93	267
964	MSTRG.11423.1	Chr01	0.37136	0	0	0	0.256037	624	174	312
965	MSTRG.114251.1	Chr14	0.0675157	0	0	0	0	285	0	0
966	MSTRG.114252.1	Chr14	0.202624	0	0	0	0	2347	1797	1902
967	MSTRG.114252.2	Chr14	0.0695477	0	0	0	0	774	573	606
968	MSTRG.114295.1	Chr14	0.508396	0	0	0	0	605	72	141
969	MSTRG.114342.1	Chr14	0.0243107	0.0254833	0.0314163	0.164121	0.0826323	963	555	606
970	MSTRG.114360.1	Chr14	0.064842	0.016269	0.042354	0.409367	0.0146963	1145	816	861
971	MSTRG.114376.8	Chr14	0.041803	0	0	0	0	813	618	627
972	MSTRG.114396.1	Chr14	0	0.0159343	0.055274	0.0109093	0.0480293	591	0	96
973	MSTRG.114420.1	Chr14	0.162868	0.0915837	0.169314	0.125068	0.0496007	1882	1632	1725
974	MSTRG.114420.2	Chr14	0.444445	0.443718	0.39054	0.365084	0.116488	1405	1113	1233
975	MSTRG.114420.5	Chr14	0.144081	0.0182903	0.047757	0.0256557	0.314618	726	462	570
976	MSTRG.114420.6	Chr14	1.34824	0.294943	1.38483	0.376882	0.632821	475	213	321
977	MSTRG.114440.1	Chr14	0.323449	0.924784	0.446975	1.24242	0.163955	2448	2127	2289
978	MSTRG.114440.3	Chr14	0	0	0	0.0591387	0.0844053	777	0	81
979	MSTRG.114522.1	Chr14	0.0370953	0	0.068445	0	0	252	0	36
980	MSTRG.11457.2	Chr01	0	0	0	0	0.167737	1636	1344	1407
981	MSTRG.114585.3	Chr14	0.184305	0.270257	0	0.248742	0.35938	1393	216	291
982	MSTRG.114592.2	Chr14	0.00209367	0.00915067	0.0577397	0.003836	0	3547	795	1095
983	MSTRG.114610.1	Chr14	0	0.239624	0	0.040007	0	806	222	534
984	MSTRG.114610.2	Chr14	0	0.0202297	0	0.352914	0	476	0	63
985	MSTRG.114708.1	Chr14	0	0.297594	0	0	0	235	0	0
986	MSTRG.114714.29	Chr14	0.152245	0.300201	0.390534	0.142827	0.114155	1291	420	453
987	MSTRG.114764.1	Chr14	0	0	0	0	0.0596613	207	30	45
988	MSTRG.114787.1	Chr14	0.0163797	1.15996	0.034141	1.09796	0	283	0	0
989	MSTRG.114843.2	Chr14	0.022342	0.00999967	0.346928	0	0.0968523	253	75	96
990	MSTRG.114847.1	Chr14	0	0.073457	0	0.099061	0	282	0	0
991	MSTRG.11486.1	Chr01	0.156143	14.7068	0.127304	26.0625	1.33515	492	303	306
992	MSTRG.114891.1	Chr14	0.122143	0.186253	0.200369	0.210147	0.0530633	561	327	357
993	MSTRG.114894.3	Chr14	0.0771493	0.0503673	0.0692597	0.156071	0.0176893	345	0	189
994	MSTRG.114913.3	Chr14	0.164579	0.198127	0	0.097872	0	939	0	123
995	MSTRG.114916.2	Chr14	0	0	0	0.123865	0	416	0	0
996	MSTRG.114932.2	Chr14	0	0	0	0.057981	0	599	327	345
997	MSTRG.115023.1	Chr14	0	0.784724	0	1.23879	0	261	0	0
998	MSTRG.115027.4	Chr14	0.111834	0.0210887	0.136905	0.0189403	0.0476927	2335	57	195
999	MSTRG.11513.1	Chr01	0.0852963	0.0504233	0	0.494499	0.036489	2884	897	960
1000	MSTRG.11513.2	Chr01	0.025444	0	0	0.200296	0.0430093	1069	873	915
1001	MSTRG.11513.3	Chr01	0.0341887	0.0110413	0	0.335102	0.051261	960	747	795
1002	MSTRG.11513.4	Chr01	0	0	0	0	0.0760127	699	429	477
1003	MSTRG.11513.5	Chr01	0.0236267	0.0127497	0.013356	0.0366623	0.0141797	1281	1068	1116
1004	MSTRG.115166.1	Chr14	0.0997473	0	0	0	0	215	0	54
1005	MSTRG.11520.2	Chr01	0.0723413	0.0470727	0.021629	0.139046	0.0934173	388	0	231
1006	MSTRG.115204.1	Chr14	0.137716	0	0.063277	0	0	574	120	153
1007	MSTRG.11521.1	Chr01	0.0148563	0.778718	0.0557937	2.61453	0.00565467	5161	1794	1947
1008	MSTRG.11522.1	Chr01	0.216404	0.175264	0.137727	0.320187	0.0612927	538	204	324
1009	MSTRG.115247.30	Chr14	0.223927	0.0505637	0.15828	0.0817807	0.215896	306	0	0
1010	MSTRG.115272.10	Chr14	0.122843	0.33613	8.93333e-05	0.281624	0.0509527	1378	960	1221
1011	MSTRG.115272.7	Chr14	0.117456	0.250477	0.0544147	0.211157	0.0243113	1375	960	1218
1012	MSTRG.115302.1	Chr14	0.445081	30.4024	0.658739	26.6482	0.183723	857	42	81
1013	MSTRG.115306.2	Chr14	0.359865	1.46448	0.288362	0.932142	0.0188343	1704	1413	1524
1014	MSTRG.115354.1	Chr14	0.166864	0	0	0	0	229	0	0
1015	MSTRG.115480.1	Chr14	0.064592	0.210876	0.0721037	0.302986	0.0267143	656	444	501
1016	MSTRG.115483.1	Chr14	0.191019	0	0.0759153	0	0.228194	557	0	0
1017	MSTRG.115554.3	Chr14	0.004092	0.158168	0	0.00571233	0.0389713	772	306	534
1018	MSTRG.115714.1	Chr14	0	0.0317103	0.009923	0.0920903	0	306	0	111
1019	MSTRG.115749.1	Chr14	0.417699	0.0529987	0	0	0.012412	923	348	459
1020	MSTRG.115793.1	Chr14	0.00866067	0.109851	0.0991723	0.133891	0.0147373	287	0	0
1021	MSTRG.115873.2	Chr14	0.0944853	0.00494633	1.06235	0	0.0230117	882	102	162
1022	MSTRG.115876.4	Chr14	0.115095	0.018136	0.122943	0.123389	0.196738	1830	39	165
1023	MSTRG.115876.7	Chr14	0.0306223	0.075573	0	0.0986077	0	953	540	609
1024	MSTRG.115876.8	Chr14	0.0889943	0.140487	0.097055	0.420498	0.0554633	1153	507	567
1025	MSTRG.115877.1	Chr14	0	25.0163	0.0518687	36.5948	0	414	198	246
1026	MSTRG.115877.2	Chr14	0	4.69298	0.0602467	6.83196	0	366	150	198
1027	MSTRG.115877.3	Chr14	0.0975383	40.2855	0.0801417	43.2192	0.019195	1795	1578	1626
1028	MSTRG.115877.4	Chr14	0.037005	2.34844	0.0983007	0	0	555	189	285
1029	MSTRG.115877.5	Chr14	0	1.63403	0	0	0	385	93	144
1030	MSTRG.115877.6	Chr14	0	0.362344	0	1.06366	0	414	198	246
1031	MSTRG.115878.1	Chr14	0	0.131787	0.0695457	0.06805	0	341	150	186
1032	MSTRG.115913.1	Chr14	0.00377867	0.926177	0.171963	0.483865	1.81803	1199	228	315
1033	MSTRG.115931.1	Chr14	0.0308877	0	0	0.346772	0	426	0	120
1034	MSTRG.115997.1	Chr14	0.0101503	0.005579	0.188845	0.009938	0.00884767	439	0	45
1035	MSTRG.116011.1	Chr14	0	0	0.114016	0.0735613	0	385	0	90
1036	MSTRG.116022.1	Chr14	0.0140657	0.07334	0	0.0638877	0	418	0	84
1037	MSTRG.116035.1	Chr14	0	0	0	0.09049	0	551	0	0
1038	MSTRG.116192.1	Chr14	0.317541	0.218162	0.123315	0.156828	0.0693233	1287	390	459
1039	MSTRG.116257.1	Chr14	0.27018	0	0	0	0	346	111	189
1040	MSTRG.116310.1	Chr14	0.196701	0	0.021914	0	0	206	0	33
1041	MSTRG.11632.1	Chr01	0	0	0.060301	0.06175	0	353	162	186
1042	MSTRG.116406.1	Chr14	0.0557777	0	0.17961	0	0	1098	546	651
1043	MSTRG.116449.1	Chr14	0	0	0	0	0.0709863	386	0	51
1044	MSTRG.116520.2	Chr14	0.0297373	0.0461723	0.546619	0	0	1930	339	588
1045	MSTRG.116520.3	Chr14	0.00239167	0	0.128876	0	0	734	411	564
1046	MSTRG.116540.1	Chr14	0.048066	0.0220253	0.183922	0.005358	0.0549567	986	315	444
1047	MSTRG.116540.2	Chr14	0.0980817	0	0.220853	0	0.116007	577	315	423
1048	MSTRG.116540.3	Chr14	0.10655	0.000128667	0	0	0	779	180	252
1049	MSTRG.116540.4	Chr14	0.181767	0.00173667	0.0386523	0	0.000683667	768	525	612
1050	MSTRG.116540.5	Chr14	0	0	0.0881363	0	0.00407067	903	267	360
1051	MSTRG.116540.6	Chr14	0	0.0111373	0.12224	0	0.214188	502	141	270
1052	MSTRG.116547.3	Chr14	0.177509	0	0.243139	0	0	575	363	420
1053	MSTRG.1166.1	Chr00	0	0	0	0	0.0652063	1183	207	270
1054	MSTRG.1166.2	Chr00	0	0.014892	0	0	0.152292	1432	387	423
1055	MSTRG.1166.3	Chr00	0	0	0	0	0.22173	1121	159	222
1056	MSTRG.116743.1	Chr14	1.25031	2.76345	1.18956	0.71544	0.0137757	1453	549	624
1057	MSTRG.116743.2	Chr14	0.133789	0.5002	0.24355	0.237012	0	671	222	297
1058	MSTRG.116743.3	Chr14	1.07168	0.970171	0.964309	0.142893	0.102461	714	498	561
1059	MSTRG.116743.4	Chr14	0.00459733	0.202782	0.0626307	0	0.0141683	711	495	558
1060	MSTRG.116743.5	Chr14	0.0881247	0.285498	0.042497	0	0	951	255	285
1061	MSTRG.116743.6	Chr14	0.105208	0.090655	0	0	0	708	30	99
1062	MSTRG.116743.7	Chr14	0.0121923	0.11279	0.0136333	0.038299	0.001259	1104	204	234
1063	MSTRG.116743.8	Chr14	3.33333e-06	0.240259	0.00731767	0	0	857	183	213
1064	MSTRG.116744.1	Chr14	0.217308	0.494321	0.162129	0.00790867	0	334	69	129
1065	MSTRG.116895.2	Chr14	0	0.110442	0	0	0	278	45	123
1066	MSTRG.116913.1	Chr14	0.133177	0.00717867	0.0925623	0.059971	0	375	0	0
1067	MSTRG.116913.2	Chr14	0.0441467	0.117878	0.00616867	0.0567387	0.00793533	387	0	0
1068	MSTRG.116987.1	Chr14	1.2145	0.733091	0.949994	0.24968	0.283844	411	171	258
1069	MSTRG.116992.1	Chr14	0.353941	3.0457	0	2.99225	0	264	57	57
1070	MSTRG.117067.2	Chr14	0.0848703	0	0.0641743	0	0	282	0	0
1071	MSTRG.117115.1	Chr14	0.124552	0.0208667	0.104725	0.027591	0	363	24	87
1072	MSTRG.11943.1	Chr01	0.296514	0.190849	0.162022	0.147744	0.00426267	352	0	0
1073	MSTRG.119450.2	Chr15	0.068404	0.007948	0	0	0	213	27	57
1074	MSTRG.119454.6	Chr15	0	0.12172	0.0722163	0	0	422	0	57
1075	MSTRG.119454.7	Chr15	0	0.0924837	0	0	0	425	0	60
1076	MSTRG.119456.2	Chr15	0.0769847	0	0	0	0.0144583	1014	663	858
1077	MSTRG.119488.2	Chr15	0.644515	2.29559	0.867621	3.03864	0.173474	415	0	0
1078	MSTRG.119514.20	Chr15	0.086824	0.06547	0	0	0	815	597	660
1079	MSTRG.119516.2	Chr15	0	0.039331	0	0	0	709	495	552
1080	MSTRG.11953.1	Chr01	0.00874533	0	0.204275	0	0	720	126	306
1081	MSTRG.11953.4	Chr01	0	0	0.183198	0	0	963	372	549
1082	MSTRG.11953.5	Chr01	0.0265307	0	0.20407	0	0	1211	582	759
1083	MSTRG.11953.6	Chr01	0	0	0.0599467	0	0	968	345	516
1084	MSTRG.11953.7	Chr01	0	0	0.0729697	0	0	864	243	414
1085	MSTRG.119541.8	Chr15	0.877858	1.21797	1.7039	1.26976	0.474526	2462	1584	1593
1086	MSTRG.119549.4	Chr15	0.0472127	0.035048	0.0386317	0	0	653	9	183
1087	MSTRG.119556.1	Chr15	0.00281433	0.105607	0.0296963	0.05895	0.008035	254	12	87
1088	MSTRG.119560.1	Chr15	0.153159	0.443361	0.164351	0.561247	0.055894	952	120	231
1089	MSTRG.119601.2	Chr15	0.0365603	0.0115317	0	0.180829	0	388	132	189
1090	MSTRG.119610.1	Chr15	0	0	0	0.122993	0.0215423	1137	381	459
1091	MSTRG.119652.1	Chr15	0.124093	0	0	0	0.0290617	207	0	0
1092	MSTRG.119699.1	Chr15	0	0.012443	0.00251067	0.431434	0	2290	2040	2064
1093	MSTRG.119705.1	Chr15	0.00416367	0.0823337	0	0.219838	0	443	0	87
1094	MSTRG.119705.2	Chr15	0.0136937	0.194876	0	0.07983	0	674	411	447
1095	MSTRG.119795.1	Chr15	0.0169307	0	0.00542933	0.0551073	0	286	30	72
1096	MSTRG.119800.4	Chr15	0.0928467	0.067858	0.085142	0.171827	0.032693	2884	801	1173
1097	MSTRG.119806.1	Chr15	0	0	0	0.0774727	0	248	51	78
1098	MSTRG.119849.1	Chr15	0	0	0.095823	0	0	234	0	0
1099	MSTRG.119865.1	Chr15	0	0.0809893	0	0	0	202	45	45
1100	MSTRG.11988.2	Chr01	0	0	0.428879	0	0	472	0	0
1101	MSTRG.119883.1	Chr15	0.420104	0.199096	0.415433	0.366834	3.7895	813	597	609
1102	MSTRG.119910.1	Chr15	0.0116467	0.233373	0	0.0110987	0	476	201	225
1103	MSTRG.119998.1	Chr15	0	0	0	0.0712213	0	258	0	0
1104	MSTRG.120013.1	Chr15	0	0	0.177245	0	0	208	0	0
1105	MSTRG.120035.2	Chr15	0.0837503	0	0	0	0	290	0	0
1106	MSTRG.120073.1	Chr15	0.12285	0	0	0	0	252	0	99
1107	MSTRG.120089.8	Chr15	0.0396403	0.035549	0.014295	0.120197	0.0240653	401	240	246
1108	MSTRG.120107.1	Chr15	0.131371	0	0	0	0	311	0	102
1109	MSTRG.120125.4	Chr15	0.119473	0.0268473	0.209513	0	0	605	249	297
1110	MSTRG.120174.1	Chr15	0.022844	0.20233	0.0340123	0.138162	0.326649	596	153	324
1111	MSTRG.120212.20	Chr15	0.0586097	0	0.00653667	0	0	220	0	66
1112	MSTRG.120231.1	Chr15	0.0228293	0.11314	0.00235233	0.154165	0.00428833	277	18	54
1113	MSTRG.120237.10	Chr15	0.142361	0	0.025893	0.091274	0	461	78	306
1114	MSTRG.120237.2	Chr15	0.0412303	0	0.462304	0.007908	0	1278	918	1125
1115	MSTRG.120237.6	Chr15	0	0	0.91577	0	0	1266	882	1110
1116	MSTRG.120237.7	Chr15	0.0475483	0	1.43481	0	0	775	222	345
1117	MSTRG.120237.9	Chr15	0.133885	0	0.43638	0	0	854	573	684
1118	MSTRG.120243.1	Chr15	0.109118	0	0	0	0	245	0	0
1119	MSTRG.12037.1	Chr01	0.0566277	0	0.299134	0	0	1259	9	129
1120	MSTRG.12037.2	Chr01	0.193329	0.0555713	0.232312	0.00270967	0	1100	0	87
1121	MSTRG.12037.3	Chr01	0.154317	0.060951	0.211845	0.147448	0	1095	0	84
1122	MSTRG.12037.4	Chr01	2.90725	0.40169	4.54781	0.148606	0.165385	706	60	291
1123	MSTRG.120409.1	Chr15	0.060253	0	0	0	0	214	0	12
1124	MSTRG.120434.1	Chr15	0.0121757	0.0957387	0	0	0	367	201	207
1125	MSTRG.120454.1	Chr15	0.0846603	0.0218727	0.022775	0.00865833	0.0100027	438	81	183
1126	MSTRG.120469.1	Chr15	0	0	0.0776273	0	0.121828	414	21	237
1127	MSTRG.120483.2	Chr15	0	0.107021	0	0	0	1266	408	591
1128	MSTRG.120548.2	Chr15	0.0823487	0.126818	0.0475917	0.0182457	0.0341527	581	96	189
1129	MSTRG.120572.1	Chr15	0.013828	0	0	0	0.174184	1063	174	174
1130	MSTRG.120633.2	Chr15	0	0.0606783	0.0104953	0.562728	0	390	102	141
1131	MSTRG.120648.1	Chr15	0	0	0.0826813	0.022387	0	632	132	252
1132	MSTRG.120660.2	Chr15	0.0395027	0.143511	0	1.02867	0	725	21	132
1133	MSTRG.120687.2	Chr15	0.680399	0	0	0	0	1128	609	672
1134	MSTRG.120687.3	Chr15	0.621285	0	0	0	0	1128	609	669
1135	MSTRG.120687.4	Chr15	0.361766	0	0	0	0	1128	609	672
1136	MSTRG.120721.1	Chr15	0.564308	89.2132	1.59879	44.9716	0.323357	242	0	45
1137	MSTRG.120721.2	Chr15	0.274773	23.2698	0.762679	23.6326	0.281137	1043	198	282
1138	MSTRG.120737.2	Chr15	0	0	0	0.0909677	0	219	0	0
1139	MSTRG.12075.1	Chr01	0.135599	1.91475	0.495074	1.13301	0.117907	250	24	96
1140	MSTRG.120772.2	Chr15	0.0238637	0	0.138975	0	0.00757433	314	0	159
1141	MSTRG.120776.1	Chr15	0.0858283	0.645069	0.0221983	0.921697	0.150132	259	0	0
1142	MSTRG.120783.1	Chr15	0	5.56142	0	0.260585	0	1479	207	345
1143	MSTRG.120783.2	Chr15	0	0.810035	0	4.93379	0	1525	207	345
1144	MSTRG.120783.3	Chr15	0.0409647	1.91789	0.122881	1.02911	0.161156	1961	207	345
1145	MSTRG.120783.4	Chr15	0	1.68767	0	1.20319	0	1448	207	345
1146	MSTRG.120795.1	Chr15	0	0.0542577	0.00381367	0	0	506	0	0
1147	MSTRG.120812.1	Chr15	69128.4	41641.2	45292.6	56355.4	8205.27	354	9	195
1148	MSTRG.120812.2	Chr15	5527.76	2376.44	1510.37	2779.74	3647.56	322	3	147
1149	MSTRG.120812.3	Chr15	1721.08	966.46	1335.83	1100.19	132.433	310	0	153
1150	MSTRG.120813.1	Chr15	114.828	20.4498	4.43534	2.75788	0.168144	302	0	147
1151	MSTRG.120880.1	Chr15	0	0	0.050906	0	0.0514013	224	0	57
1152	MSTRG.120967.2	Chr15	0	0.0199753	0.107284	0	0	241	0	87
1153	MSTRG.121038.1	Chr15	0	0.165628	0	0	0	219	39	63
1154	MSTRG.121086.3	Chr15	0.0388083	0.00115533	0.000794667	0.0613237	0.203623	445	0	69
1155	MSTRG.121086.4	Chr15	0.0527827	1.46997	0.0302513	2.95552	0.549115	750	252	312
1156	MSTRG.121086.5	Chr15	0.122336	2.1303	0.0100427	2.43882	0.328814	990	249	309
1157	MSTRG.121086.6	Chr15	0.126888	1.56808	0.116233	2.22111	0.705103	922	249	309
1158	MSTRG.121086.7	Chr15	0.148846	2.59712	0.0831697	3.85828	0.845725	922	249	309
1159	MSTRG.121088.1	Chr15	0.0332057	0	0.148227	0	0	601	372	372
1160	MSTRG.121089.1	Chr15	0.0602863	0	0.015895	0	0	416	210	210
1161	MSTRG.121148.1	Chr15	0.303139	0.0858727	0.120443	0.1271	0.571401	614	147	297
1162	MSTRG.12123.2	Chr01	0	0	0.186147	0	0	564	105	210
1163	MSTRG.12123.3	Chr01	0	0	0.124204	0	0	732	168	273
1164	MSTRG.12123.4	Chr01	0	0.0323557	0	0.0762447	0	660	30	201
1165	MSTRG.121262.1	Chr15	0.081518	0.139421	0	0.0792523	0	917	30	144
1166	MSTRG.121262.2	Chr15	0.621445	0.001444	0	0.029074	0.107037	824	249	327
1167	MSTRG.121262.3	Chr15	0.0178733	0.120557	0.00839733	0	0	991	150	231
1168	MSTRG.121262.4	Chr15	0.125273	0	0	0	0	675	111	210
1169	MSTRG.121288.1	Chr15	0	0	0.106948	0	0	676	204	204
1170	MSTRG.121324.1	Chr15	0	0	0.171735	0	0.247717	295	12	126
1171	MSTRG.121324.3	Chr15	0	0	0.104706	0	0.33083	253	24	84
1172	MSTRG.121336.3	Chr15	0.206519	0.131651	0.189969	0.0575187	2.44498	1006	156	255
1173	MSTRG.121386.1	Chr15	0	0.321119	0	0.343055	0	362	162	207
1174	MSTRG.121488.1	Chr15	0	0.0101957	0	0.013962	0.103568	250	30	33
1175	MSTRG.121523.1	Chr15	0	0.07889	0	0.126497	0	235	30	57
1176	MSTRG.121529.1	Chr15	0.0348127	0.0203417	0.00849867	0.0993363	0	1353	42	144
1177	MSTRG.121582.2	Chr15	0.142584	0	0.0739187	0.0264423	0.0777427	416	54	204
1178	MSTRG.121625.1	Chr15	0.0620957	0	0	0	0	217	0	63
1179	MSTRG.121641.27	Chr15	0.0350017	1.0523	0.328663	0.151765	0	688	96	222
1180	MSTRG.121641.28	Chr15	0.0188617	0.048526	0.0371453	0.0320237	0.0695103	5406	2655	2742
1181	MSTRG.121641.29	Chr15	0.19078	0	0.0450607	0	0.012608	1617	1167	1230
1182	MSTRG.121641.3	Chr15	0.984486	0.10784	1.43608	0.522557	0.294739	6098	1221	1317
1183	MSTRG.121641.31	Chr15	0.398104	0	0.000546667	0.225885	0.000202667	5621	5172	5235
1184	MSTRG.121641.32	Chr15	0.382556	0	0.00671667	0	0.0440247	6101	2598	2685
1185	MSTRG.121641.34	Chr15	0.671325	0.00131633	0	0	0.048932	1913	159	198
1186	MSTRG.121641.35	Chr15	0.238489	0	0	0	0.0342953	1436	1029	1092
1187	MSTRG.121641.36	Chr15	0.0587377	0	0	0	0.0994497	1188	165	204
1188	MSTRG.121641.37	Chr15	0.821189	0	0	0	0.444245	1162	168	207
1189	MSTRG.121644.1	Chr15	0.102303	0.205812	0.477785	0.401315	0.129726	3772	6	45
1190	MSTRG.121644.3	Chr15	0	0	0.0604907	0.0583257	0.061586	921	12	18
1191	MSTRG.121644.4	Chr15	0.00273	0.00802667	0	0.837508	0	2409	63	147
1192	MSTRG.121644.5	Chr15	0	0	0	1.84181	0	2018	9	93
1193	MSTRG.121644.8	Chr15	0	0	0	0.06408	0	622	0	30
1194	MSTRG.121710.1	Chr15	0.500459	0.012406	0	0	0	377	0	0
1195	MSTRG.121787.1	Chr15	0.0850743	0	0	0	0	288	0	132
1196	MSTRG.121825.2	Chr15	0	0	0	0	0.0393133	628	0	219
1197	MSTRG.121846.5	Chr15	0	0.0305647	0	0.0863457	0	605	273	300
1198	MSTRG.121849.1	Chr15	0	0	0	0.182424	0.0215823	517	120	300
1199	MSTRG.121849.2	Chr15	0.013103	0.046924	0	0.135729	0.0197357	1540	120	249
1200	MSTRG.121849.3	Chr15	0.0691577	0.100611	0.0131033	0.272392	0.0489847	1818	120	246
1201	MSTRG.121849.4	Chr15	0	0	0	0.0719357	0	1482	84	201
1202	MSTRG.121849.5	Chr15	0.02046	0.0516747	0	0.19564	0.061631	286	69	129
1203	MSTRG.121884.1	Chr15	0.077589	0.044502	0.193119	0	0	889	183	246
1204	MSTRG.121888.1	Chr15	0	0.0315537	0.05138	0	0.0575757	326	0	0
1205	MSTRG.121963.1	Chr15	0.0569583	0	0	0	0	226	12	69
1206	MSTRG.121968.1	Chr15	0.337118	0.0925167	0.193878	0.161805	0.823903	212	0	0
1207	MSTRG.121991.1	Chr15	0	0.326748	0.018026	0	0.014208	965	438	588
1208	MSTRG.121991.2	Chr15	0.0367497	0.393681	0.030195	0.0309007	0.002216	1441	999	1065
1209	MSTRG.121991.3	Chr15	0	0.246065	0.0262633	0.00356967	0.004693	1670	1200	1293
1210	MSTRG.122007.1	Chr15	0.009888	0.042395	0	1.02668	0.0271057	652	204	204
1211	MSTRG.122011.1	Chr15	0.320259	0.073395	0.0145823	0	0	2213	96	240
1212	MSTRG.122011.2	Chr15	0.167241	0.001075	0	0	0	2198	96	240
1213	MSTRG.122016.1	Chr15	0.364623	0.31069	0.498601	0.687309	0.175169	1206	795	984
1214	MSTRG.122039.7	Chr15	0.12106	0	0	0	0	243	0	90
1215	MSTRG.122096.1	Chr15	0.140061	0	0	0	0	324	99	159
1216	MSTRG.122123.1	Chr15	0.0522103	0.00371467	0	0	0	332	102	177
1217	MSTRG.12216.2	Chr01	0	0	0.0875817	0	0	293	123	138
1218	MSTRG.122173.2	Chr15	0.0402697	0.004548	0.11592	0	0.00824133	387	51	138
1219	MSTRG.12220.1	Chr01	0.169799	0	0.109088	0	0.0511067	546	291	390
1220	MSTRG.12223.2	Chr01	0.15773	0.216338	0.177846	0.0703337	0.065827	400	192	246
1221	MSTRG.122258.1	Chr15	0.121823	0.0561207	0.163026	0	0.028248	419	258	264
1222	MSTRG.122276.2	Chr15	0	0	0	0.753394	0.161594	221	0	0
1223	MSTRG.122276.7	Chr15	0	0	0	0.125709	0	222	0	0
1224	MSTRG.122286.1	Chr15	2.24624	2.11923	1.49838	1.17686	0.408633	680	306	315
1225	MSTRG.122286.2	Chr15	0.694328	6.32016	0.715691	5.33425	0.13225	572	300	309
1226	MSTRG.122286.3	Chr15	0.194595	0.249092	0.205168	0.23056	0.0205153	639	267	276
1227	MSTRG.122298.1	Chr15	0.105142	0.683519	0.181646	0.206794	0.0306453	659	210	216
1228	MSTRG.122299.1	Chr15	0.032008	0.0452017	0.091324	0.0532563	0	445	156	162
1229	MSTRG.122308.1	Chr15	0.499301	0.00845367	0.0357857	0	0	701	210	303
1230	MSTRG.122310.1	Chr15	0.195971	0	0	0	0	683	132	225
1231	MSTRG.122315.1	Chr15	0.061386	0.0436197	0.0131103	0.0846067	0.01387	220	0	30
1232	MSTRG.122346.1	Chr15	0.116198	0	0.0108003	0	0	296	60	111
1233	MSTRG.122445.1	Chr15	0.176178	1.35735	0.355869	3.25279	0	486	0	0
1234	MSTRG.122445.2	Chr15	0.0281857	0.600864	0.27613	0.686783	0.0794187	390	0	0
1235	MSTRG.122445.3	Chr15	0.10239	0.461637	0.135141	1.00936	0	375	0	0
1236	MSTRG.122497.21	Chr15	0.390487	0.380295	0.32512	0.134976	0.185247	793	540	639
1237	MSTRG.122566.1	Chr15	0.0868143	0	0.043069	0	0.0123217	468	291	312
1238	MSTRG.122581.1	Chr15	0.0213073	0.314888	0.0344927	0.176451	0	743	516	588
1239	MSTRG.122581.2	Chr15	0	0.118284	0	0.173471	0	538	276	384
1240	MSTRG.122585.2	Chr15	0	0	0	0.050309	0	237	0	18
1241	MSTRG.122598.1	Chr15	0	0	0	0.114694	0	643	426	429
1242	MSTRG.122625.1	Chr15	0	1.8165	0.0240003	0.237148	0	1607	669	837
1243	MSTRG.122625.4	Chr15	0	0.742291	0	0.164905	0	1413	138	306
1244	MSTRG.122667.4	Chr15	1.13847	0.106722	0.219423	0.0594933	0.0307777	447	51	120
1245	MSTRG.122669.1	Chr15	0.0932093	0.023976	0.0138477	0.32544	0	842	0	87
1246	MSTRG.122684.1	Chr15	0.080495	0	0	0	0	283	9	24
1247	MSTRG.122697.15	Chr15	0.0853607	0.739004	0.0606607	0.962143	0.296243	1862	417	561
1248	MSTRG.122697.18	Chr15	0.05353	0.532937	0.072571	0.724502	0.138387	1094	918	933
1249	MSTRG.122697.19	Chr15	0.054896	0.940117	0	0.492006	0.0332297	767	603	612
1250	MSTRG.122697.20	Chr15	0.188	1.69105	0.342589	1.55605	0.368954	1968	756	906
1251	MSTRG.122697.21	Chr15	0.198751	0.750488	0.070965	0.866161	0.0956987	1968	756	906
1252	MSTRG.122697.22	Chr15	0	0.105643	0	0.0635823	0	1013	0	150
1253	MSTRG.122698.1	Chr15	0.01535	0.103505	0	0.042383	0	224	0	6
1254	MSTRG.122750.2	Chr15	0.07564	0	0	0	0.0142733	540	132	150
1255	MSTRG.12276.1	Chr01	0.193354	0.338579	0.16715	0.183837	0.0771543	810	348	462
1256	MSTRG.122777.1	Chr15	0.216214	0.226044	0.616022	1.77326	0.0208853	240	0	0
1257	MSTRG.122797.1	Chr15	0	0.126565	0.0301103	0	0	215	0	60
1258	MSTRG.122923.1	Chr15	0.004799	0.818342	0.013813	0.620321	0.049908	475	306	312
1259	MSTRG.122951.1	Chr15	0	0.022391	0	0	0.111477	548	0	228
1260	MSTRG.122956.2	Chr15	0.0196433	0	0.159604	0	0	690	381	399
1261	MSTRG.122972.1	Chr15	0	0.0507397	0	0	0	232	0	75
1262	MSTRG.122976.1	Chr15	0.01107	0	0	0	0.0512583	210	0	0
1263	MSTRG.12302.1	Chr01	0.057441	0.00136733	0	0.092012	0	214	0	0
1264	MSTRG.123045.2	Chr15	0.543311	1.30658	0.587633	0.980483	0.0544843	2829	1773	1959
1265	MSTRG.123083.17	Chr15	0	0.099468	0	0	0	2016	1281	1365
1266	MSTRG.123083.24	Chr15	0.108011	0.17323	0.0814947	0.117027	0.074633	1914	1179	1263
1267	MSTRG.123083.6	Chr15	0.032025	0.1353	0.049072	0.108734	0	1736	999	1083
1268	MSTRG.123083.9	Chr15	0.0464923	0.157367	0.0699863	0.0723267	0.0245717	2118	1395	1467
1269	MSTRG.123138.1	Chr15	0	0	0	0.103764	0	227	0	3
1270	MSTRG.12319.1	Chr01	0.0531847	0.0207557	0.747994	0	0	540	171	324
1271	MSTRG.123191.3	Chr15	0.30012	0.397847	0.57217	0.400797	0.244535	1123	822	969
1272	MSTRG.123192.1	Chr15	0.0889447	0	0	0	0	350	9	141
1273	MSTRG.123194.6	Chr15	0.139566	0.152465	0.134782	0.290037	0.234456	1627	0	159
1274	MSTRG.12333.4	Chr01	0.512328	1.9104	0.334641	0.42761	0.213834	1537	1272	1281
1275	MSTRG.123430.1	Chr15	0.00359367	0.00788167	0.003438	0	10.8242	1976	801	870
1276	MSTRG.123430.2	Chr15	0	0	0	0	0.578208	1273	435	504
1277	MSTRG.123698.13	Chr15	0.256043	0.263839	0.165026	0.889582	0	2113	927	1194
1278	MSTRG.123698.14	Chr15	0.591519	0.579378	0.449823	1.47371	0.019466	2113	927	1194
1279	MSTRG.123698.15	Chr15	0.369771	0.428518	0.00792733	0.0348437	0.0121627	1305	135	402
1280	MSTRG.123698.16	Chr15	0	0.207728	0	0	0.000782667	660	213	459
1281	MSTRG.123698.17	Chr15	0.0533863	0.0369507	0.04385	0.558881	0	1957	663	942
1282	MSTRG.123723.2	Chr15	0.0712377	0	0	0	0	276	36	123
1283	MSTRG.123784.1	Chr15	0	0	0	0	0.121522	317	96	156
1284	MSTRG.123833.12	Chr15	0.143052	0.0851013	0	0.0654007	0	1476	240	390
1285	MSTRG.123833.13	Chr15	0.0497097	0.161803	0.058713	0.0849027	0.124659	1017	537	657
1286	MSTRG.123833.14	Chr15	0.00764067	0.0457573	0.222693	5.23333e-05	0.274727	3025	1374	1515
1287	MSTRG.123833.6	Chr15	0	0.0566733	0	0	0.008554	1037	324	465
1288	MSTRG.123833.7	Chr15	0.000726667	0.081323	0.036299	0.00193067	0.076546	3516	1137	1278
1289	MSTRG.123833.8	Chr15	0	0.078865	0.110607	0.171255	0.0403333	2990	327	429
1290	MSTRG.123833.9	Chr15	0	0.0349917	0	0.0637483	0	1569	30	177
1291	MSTRG.123837.6	Chr15	0.239816	0.083182	0.179883	0.157753	0.0665117	1908	963	972
1292	MSTRG.123843.1	Chr15	0.146329	0.006557	0.0658327	0	0.0211297	913	639	705
1293	MSTRG.123844.1	Chr15	0.11622	0.0652657	0.0876683	0.0872113	0.0153223	403	213	249
1294	MSTRG.12387.1	Chr01	0.0958563	0.179826	0.0810157	0.133596	0.011891	215	45	57
1295	MSTRG.123938.1	Chr15	0.244284	0.0614743	0	0.0709047	0.056096	328	0	0
1296	MSTRG.123947.1	Chr15	0.301316	0.558566	0.375409	0.373187	0.196703	1877	1560	1665
1297	MSTRG.123969.1	Chr15	0	0.081848	0	0	0	246	36	90
1298	MSTRG.123985.1	Chr15	0.21238	0.638013	0.0967937	0.205186	0.0286737	446	0	0
1299	MSTRG.12404.1	Chr01	0.356	0.143114	0.475072	0.0827443	0.118027	210	0	0
1300	MSTRG.124064.9	Chr15	0.156185	0	0.205832	0.015306	0.0405727	205	0	0
1301	MSTRG.124086.1	Chr15	0.188291	0	0	0	0	478	120	234
1302	MSTRG.124087.2	Chr15	4.30054	2.10737	1.29031	1.16567	0.358844	932	96	219
1303	MSTRG.12413.5	Chr01	0.056956	0	0.00373833	0	0	340	102	183
1304	MSTRG.12414.1	Chr01	0.115673	0.0141257	0	0	0	264	51	75
1305	MSTRG.124152.1	Chr15	0	0	0.0578943	0	0	212	0	0
1306	MSTRG.124158.1	Chr15	0.452964	0	0.0372603	0	0.0559717	748	45	183
1307	MSTRG.124180.1	Chr15	0.169729	0.00712767	0.014142	0	0.009035	317	24	45
1308	MSTRG.124190.1	Chr15	0	0	0	0.126616	0	818	393	510
1309	MSTRG.124193.2	Chr15	0	0.0387973	0	0.090192	0	361	12	117
1310	MSTRG.124193.3	Chr15	0	0	0	0.113562	0	502	0	99
1311	MSTRG.124205.1	Chr15	0	0.042963	0	0	0.0235407	331	51	120
1312	MSTRG.124257.1	Chr15	0.0176697	0.0533487	0.044193	0	0.021948	230	0	57
1313	MSTRG.12428.1	Chr01	0.00475133	0.131323	0	0.0547267	0	331	18	54
1314	MSTRG.124282.1	Chr15	0.143063	0	0	0	0	269	12	78
1315	MSTRG.12430.1	Chr01	0.0593887	0	0	0	0.0180533	216	0	60
1316	MSTRG.124329.11	Chr15	0	0	0	0	0.107594	721	411	417
1317	MSTRG.12434.2	Chr01	0.0791337	0	0	0	0	538	0	0
1318	MSTRG.124373.2	Chr15	0	0	0	0.119982	0	697	174	204
1319	MSTRG.124394.2	Chr15	0.0743873	0	0	0	0	409	0	0
1320	MSTRG.124395.1	Chr15	0.112215	0	0	0	0	537	258	345
1321	MSTRG.124495.1	Chr15	0.209453	0	0	0	0	1747	327	369
1322	MSTRG.124495.2	Chr15	0.117304	0	0	0	0	803	582	648
1323	MSTRG.124495.3	Chr15	0.163938	0	0	0	0	482	150	198
1324	MSTRG.124495.4	Chr15	0.10051	0	0	0	0	450	195	219
1325	MSTRG.124503.1	Chr15	0.524295	0	0	0	0	1999	399	468
1326	MSTRG.12457.29	Chr01	0.337357	0.505413	0.536682	0.300647	0.123478	274	48	78
1327	MSTRG.124578.1	Chr15	0	0.0811547	0	0.314037	0	591	102	168
1328	MSTRG.124584.1	Chr15	0.427724	0.242276	0.132924	0.874519	0.156109	1652	681	756
1329	MSTRG.124606.1	Chr15	0.0631907	0.015963	0.077704	0.046709	0	496	201	210
1330	MSTRG.12462.2	Chr01	0.060972	0.131445	0.389726	0.208687	0.133217	1089	729	816
1331	MSTRG.124623.2	Chr15	0	0.199358	0	0.0270143	0	716	135	453
1332	MSTRG.12464.1	Chr01	0.10962	0.0908187	0.170147	0.254386	0.111248	764	39	96
1333	MSTRG.12465.1	Chr01	1.13992	0.354464	0.462477	0	0.151367	299	0	144
1334	MSTRG.12465.2	Chr01	0.0848927	0.438818	0.27307	0.315372	0.0226317	282	0	126
1335	MSTRG.124671.1	Chr15	0.205594	0.160682	0.278764	0.137527	0.0643937	413	111	258
1336	MSTRG.12469.2	Chr01	0.07518	0	0	0	0	319	21	33
1337	MSTRG.12469.3	Chr01	0	0.0880843	0.0919547	0	0	519	171	237
1338	MSTRG.124702.2	Chr15	0.128086	0	0	0	0	572	96	291
1339	MSTRG.124708.1	Chr15	0	0.142285	0.0359187	0	0	839	342	507
1340	MSTRG.124708.2	Chr15	0	0.153639	0	0	0	844	240	642
1341	MSTRG.124735.3	Chr15	0.078838	0.202676	0.147233	0.294332	0.079311	2052	636	657
1342	MSTRG.124738.1	Chr15	0.16176	0.38681	0.209599	0.0987143	0.0537963	361	132	204
1343	MSTRG.124799.1	Chr15	0.0769617	0.152455	0.114654	0.236694	0.0356003	703	534	549
1344	MSTRG.124843.1	Chr15	0.121687	0.027797	0.0450993	0.0591533	0.0450383	412	3	258
1345	MSTRG.12485.1	Chr01	0	0.765765	0	0.435713	0	252	0	99
1346	MSTRG.124874.1	Chr15	0.0646603	0	0.0265033	1.79822	0	610	180	357
1347	MSTRG.124874.2	Chr15	0.03144	0	0	0.180158	0	555	174	315
1348	MSTRG.124892.1	Chr15	1.00057	1.0413	0.695377	1.02039	0.619732	422	201	267
1349	MSTRG.124896.3	Chr15	0.0348677	0	0.0122833	0	0.970957	1688	744	882
1350	MSTRG.124896.4	Chr15	0.0927083	0	0	0	0	1255	687	807
1351	MSTRG.124912.1	Chr15	0.0100933	0	0	0.0664597	0	229	0	0
1352	MSTRG.124920.1	Chr15	0	0.29498	0.00992133	0	0	1159	759	840
1353	MSTRG.124928.1	Chr15	0.120764	0	0.0105897	0	0	516	249	255
1354	MSTRG.124945.2	Chr15	0	0.224325	0	0	0.014755	2950	2583	2604
1355	MSTRG.12497.18	Chr01	0.0267293	0.0125743	0.09833	0.0638107	0.01079	1177	234	330
1356	MSTRG.124995.1	Chr15	0.462765	0.007302	0	0.0167697	0	711	288	417
1357	MSTRG.124998.1	Chr15	0.0846707	0	0.146926	0.0867397	0	444	0	0
1358	MSTRG.1250.10	Chr00	2.62056	0.825465	0.317593	1.49442	1.11157	6027	5361	5490
1359	MSTRG.1250.11	Chr00	0	0.591263	0	0.24414	0.0849253	3303	843	954
1360	MSTRG.1250.14	Chr00	0.106358	0.368509	0.045361	0.477538	0.180989	4957	4203	4332
1361	MSTRG.125000.69	Chr15	0.147076	0.039068	0.201711	0.117476	0	328	63	114
1362	MSTRG.125003.1	Chr15	0.410135	0.322728	0.285113	0.130399	0	907	0	0
1363	MSTRG.125003.2	Chr15	0.347202	0.107464	0.301845	0.189404	0.217161	827	0	0
1364	MSTRG.125006.1	Chr15	0.129815	0	0	0	0	421	153	225
1365	MSTRG.125041.1	Chr15	1.13214	0.0404413	3.43388	0.452513	0.0263187	980	231	351
1366	MSTRG.125089.1	Chr15	0.0211587	0	0.145311	0	0	645	90	168
1367	MSTRG.125192.1	Chr15	0	0.120097	0.0222167	0.0223447	0	841	267	342
1368	MSTRG.125194.1	Chr15	0.101809	0.431902	0.0891667	0.300255	0	690	372	480
1369	MSTRG.125198.1	Chr15	0	0.0751453	0.063827	0.077874	0	459	0	0
1370	MSTRG.125201.19	Chr15	0.124911	0.142095	0.324187	0.061526	0.223955	1957	768	816
1371	MSTRG.125210.1	Chr15	0	0	0	0	0.050931	274	0	120
1372	MSTRG.125224.1	Chr15	0.0113503	0.0962893	0.0364393	0.152198	0.054992	568	387	414
1373	MSTRG.125256.1	Chr15	0.0385417	0.03024	0.0670033	0	0	741	162	273
1374	MSTRG.125256.2	Chr15	0	0	0.17572	0	0	696	39	120
1375	MSTRG.125268.1	Chr15	0.085597	0.183846	0	0	0	1449	9	315
1376	MSTRG.125275.2	Chr15	0	0.141997	0.0134943	0.043868	0.0181987	358	99	201
1377	MSTRG.125307.1	Chr15	2.3849	0	0	0	0	607	117	213
1378	MSTRG.125307.2	Chr15	0.96968	0.00834467	0	0	0	696	234	303
1379	MSTRG.125307.3	Chr15	0.104481	0	0	0	0	607	162	231
1380	MSTRG.125317.1	Chr15	0.056173	0.0983873	0.068577	0.086983	0	320	9	24
1381	MSTRG.125318.1	Chr15	0.068803	0.0277753	0.134509	0.0499983	0	281	3	18
1382	MSTRG.125325.5	Chr15	0.0785263	0.160536	0.0323287	0.206351	0.0127137	889	54	228
1383	MSTRG.125325.6	Chr15	0.047014	0.127353	0	0.0395147	0	854	432	543
1384	MSTRG.125325.7	Chr15	0.089565	0.0959987	0.0183337	0.01829	0	663	114	210
1385	MSTRG.125325.8	Chr15	0	0	0	0.0982923	0	463	45	162
1386	MSTRG.125331.20	Chr15	0	0	0	0.0665933	0.007942	1372	783	1032
1387	MSTRG.125346.1	Chr15	0	0	0.0251513	0.103709	0	253	0	0
1388	MSTRG.125349.1	Chr15	0.208311	0.139047	0.211749	0.072533	0.104085	282	90	117
1389	MSTRG.125358.1	Chr15	0.078875	0.0566463	0.184913	0.033525	0.032315	262	21	108
1390	MSTRG.125376.1	Chr15	0.006498	2.86158	0.0182567	0.216017	0.0117357	1961	1173	1281
1391	MSTRG.12544.1	Chr01	0	0.0522163	0	0.013066	0.051868	477	0	0
1392	MSTRG.12547.1	Chr01	1.11514	1.05201	2.20875	0.506508	0.243233	2741	2160	2220
1393	MSTRG.125473.1	Chr15	0.499839	0.577056	0.213376	0.303774	0.0809887	593	333	438
1394	MSTRG.125485.1	Chr15	0	0	0.211277	0	0	442	87	87
1395	MSTRG.125486.1	Chr15	0.042129	0	0.150514	0	0	263	0	108
1396	MSTRG.125492.1	Chr15	0	0	0.290372	0	0	285	0	93
1397	MSTRG.125511.1	Chr15	0.121269	0	0.858771	0	0	343	111	168
1398	MSTRG.125529.1	Chr15	0	7.26473	0	17.5787	0	275	24	69
1399	MSTRG.125529.2	Chr15	0.0543063	3.89827	0.315671	25.5976	0	685	9	54
1400	MSTRG.125556.4	Chr15	0	0.093071	0	0	0	1197	789	927
1401	MSTRG.125556.7	Chr15	0.0595537	0	0	0	0	225	0	0
1402	MSTRG.125556.8	Chr15	0	0.245521	0.00448833	0	0	1951	1062	1188
1403	MSTRG.125567.1	Chr15	0.0857217	0	0	0	0	649	114	198
1404	MSTRG.125567.3	Chr15	0.136881	0.003514	0	0	0	1349	726	843
1405	MSTRG.12560.10	Chr01	0.00144533	0.023315	0.000380333	0.068292	0	268	75	90
1406	MSTRG.12560.11	Chr01	0	0.570155	0	0.0993633	0	467	6	24
1407	MSTRG.125600.1	Chr15	0.256674	0	0	0	0.038808	230	0	0
1408	MSTRG.125647.2	Chr15	0	0.061319	0	0	0	641	156	288
1409	MSTRG.125658.1	Chr15	0.639726	0.713439	0.424316	1.06437	0.452452	312	0	0
1410	MSTRG.125660.1	Chr15	0.22779	0.458354	0.111469	0.577228	0.336322	486	273	318
1411	MSTRG.125669.1	Chr15	0.105427	0.0119333	0.005145	0	0	467	201	312
1412	MSTRG.12567.2	Chr01	0	0	0.0589993	0	0.172589	428	207	273
1413	MSTRG.125673.1	Chr15	0.009816	0.102356	0	0.028551	0	2604	282	384
1414	MSTRG.125673.3	Chr15	0.018399	0.0448983	0	0.0698863	0	2928	246	354
1415	MSTRG.125673.4	Chr15	0.0142323	0.288129	0.0377203	0.0969927	0.00953367	3748	477	639
1416	MSTRG.125673.5	Chr15	0.00458933	0.0774803	0.123458	0.061704	0.00994333	1320	0	81
1417	MSTRG.125675.1	Chr15	0.037139	0.630628	0.33824	2.3612	0.006163	485	0	42
1418	MSTRG.125676.1	Chr15	0	0.135754	0	0.677777	0	1223	783	891
1419	MSTRG.125678.1	Chr15	0.226934	1.41767	0.501862	3.47841	0.0233263	473	144	276
1420	MSTRG.125696.1	Chr15	0.16284	0	0.425914	0	0.0547883	811	0	15
1421	MSTRG.12573.1	Chr01	0	0	0.173557	0	0	284	0	12
1422	MSTRG.125734.1	Chr15	0.11278	0	0	0	0.022185	506	96	105
1423	MSTRG.125737.1	Chr15	0.252252	0	0	0	0	364	0	69
1424	MSTRG.125748.1	Chr15	0.178911	0.812373	0.052292	0.43586	0.048798	350	0	114
1425	MSTRG.125846.1	Chr15	0.317759	0.023041	0.121647	0	0.0172397	565	300	411
1426	MSTRG.125856.1	Chr15	0.22619	0	0	0.022742	0	641	177	327
1427	MSTRG.125856.2	Chr15	0.261726	0	0	0	0	643	213	366
1428	MSTRG.125880.6	Chr15	0.00557633	0.135362	0	0.155369	0	2490	759	852
1429	MSTRG.125880.7	Chr15	0.0657667	0.226322	0.114273	0.618704	0.0123927	5062	3096	3183
1430	MSTRG.125880.8	Chr15	0	0	0	0.138769	0	921	141	189
1431	MSTRG.125880.9	Chr15	0.0811817	0.113748	0	0.1801	0.119825	1030	525	528
1432	MSTRG.125883.1	Chr15	0.0141703	0.100655	0.0220827	0	0	336	0	0
1433	MSTRG.125883.2	Chr15	0	0.123221	0.157685	0.0608623	0	216	0	0
1434	MSTRG.125897.1	Chr15	0	0.0933547	0	0	0	216	6	42
1435	MSTRG.125900.2	Chr15	0.261271	0.0699747	0.03483	0.018482	0.499138	220	0	0
1436	MSTRG.125921.1	Chr15	0.918768	0.286294	0.348759	0.156013	0.247321	443	153	288
1437	MSTRG.125944.1	Chr15	1.73416	0.907342	1.31032	1.18635	0.106775	368	177	213
1438	MSTRG.125945.1	Chr15	0	0.298237	0	0.203556	0	262	0	0
1439	MSTRG.125946.1	Chr15	0.09297	0.00395867	0.0250597	0	0	500	0	0
1440	MSTRG.125956.1	Chr15	0.209764	0	0	0	0	1833	156	315
1441	MSTRG.126097.2	Chr15	0.030712	0	0	0.0635517	0	267	18	111
1442	MSTRG.126166.1	Chr15	0	0.239665	0.0507463	0	0	965	573	663
1443	MSTRG.126166.3	Chr15	0	0.285436	0	0	0	966	555	645
1444	MSTRG.126166.4	Chr15	0.0336363	0.168405	0.183682	0.008761	0	603	159	282
1445	MSTRG.126174.1	Chr15	0.076491	0	0	0	0	251	3	72
1446	MSTRG.126184.1	Chr15	0.0451513	0.0728853	0.0960817	0.264361	0.006553	220	0	0
1447	MSTRG.126184.2	Chr15	0.04374	0.0547383	0.111571	0.259713	0.006553	220	0	0
1448	MSTRG.126194.1	Chr15	0.043046	0.00958267	0.139585	0	0.069506	1045	753	816
1449	MSTRG.126194.2	Chr15	0	0	0.0825123	0	0	929	744	774
1450	MSTRG.126194.3	Chr15	0.424493	0.00612333	0.350305	0	0.134794	1418	591	654
1451	MSTRG.126194.4	Chr15	0.230034	0	0.156324	0	0.0990453	943	585	660
1452	MSTRG.126194.5	Chr15	0	0	0	0	0.0993633	580	324	423
1453	MSTRG.126196.1	Chr15	0.204071	0	0	0	0	725	393	504
1454	MSTRG.126232.1	Chr15	0	0	0	0.0664947	0	317	0	0
1455	MSTRG.126255.1	Chr15	0.32921	0.173227	0.142998	0.140152	0.000520667	875	519	525
1456	MSTRG.126263.1	Chr15	0	0.167394	0	0	0	938	576	705
1457	MSTRG.126263.3	Chr15	0	0.217172	0	0	0.0269233	1054	807	900
1458	MSTRG.126291.1	Chr15	0.0356357	0.128299	0.00674067	0.112787	0.0905643	880	129	306
1459	MSTRG.126319.1	Chr15	0.354882	0.395784	0.00767633	0.0763673	0.006516	885	267	408
1460	MSTRG.126319.3	Chr15	0.0234123	0.491387	0	0.126828	0.00389933	1581	1386	1425
1461	MSTRG.126326.1	Chr15	0.047615	0.0465367	0	0	0	555	315	402
1462	MSTRG.126326.2	Chr15	0.0149793	0.0628423	0	0	0	219	0	63
1463	MSTRG.126337.1	Chr15	0	0	0	0.305853	0	565	0	0
1464	MSTRG.126342.1	Chr15	0.307416	0.176668	0.226053	0.224926	0.162415	287	87	132
1465	MSTRG.12638.9	Chr01	0.0574943	0	0	0	0	326	0	0
1466	MSTRG.126407.2	Chr15	0	0	0.132315	0	0	430	213	276
1467	MSTRG.126428.1	Chr15	0.211407	0.0773787	0.121983	0.095085	0.129617	1053	0	0
1468	MSTRG.126450.1	Chr15	0.0826153	0.00803333	0.166879	0.0135547	0	773	138	246
1469	MSTRG.12646.1	Chr01	0.025884	0.102413	0	0.336497	0	519	246	273
1470	MSTRG.12646.2	Chr01	0.0310927	0.10572	0	0.24658	0	361	171	192
1471	MSTRG.126460.1	Chr15	0.007259	0.054814	0	0	0	229	0	0
1472	MSTRG.126463.2	Chr15	0.0591017	0	0.0413103	0.0879937	0	412	183	189
1473	MSTRG.126465.2	Chr15	0.700749	0.125283	0.262247	0.024831	0.202481	1433	0	123
1474	MSTRG.126497.1	Chr15	0.0129537	0.097043	0.0516493	0.0585387	0	204	0	51
1475	MSTRG.126501.1	Chr15	0.0656867	0	0	0	0	387	60	72
1476	MSTRG.126509.2	Chr15	0.133985	0.233073	0.241617	0.162765	0.082605	707	399	501
1477	MSTRG.126509.3	Chr15	0.033807	0.360181	0.395748	0.092445	0	631	99	204
1478	MSTRG.126509.5	Chr15	0.0116203	0.096286	0.0749087	0.00806533	0.0306643	1184	930	978
1479	MSTRG.126509.6	Chr15	0.054067	0.214091	0.079744	0.206866	0.0712217	482	183	291
1480	MSTRG.126509.7	Chr15	0.194415	0.484843	0.218553	0.14502	0.000999	1264	507	753
1481	MSTRG.126509.8	Chr15	0.0598877	0.204074	0.312761	0	0	628	156	432
1482	MSTRG.126509.9	Chr15	0.038032	0.136985	0.0717637	0.046712	0.0329467	1465	144	315
1483	MSTRG.126522.1	Chr15	0	0.641993	0	0	0.001908	361	54	90
1484	MSTRG.126550.1	Chr15	0.0878863	0	0	0	0	549	141	252
1485	MSTRG.126552.2	Chr15	0.10604	0	0	0	0	859	219	249
1486	MSTRG.126554.1	Chr15	0	0	0.108192	0	0	510	54	66
1487	MSTRG.126586.1	Chr15	0.189471	0	0	0	0	1221	657	687
1488	MSTRG.126613.1	Chr15	0.036737	0.0113257	0	0	0.0700217	212	0	0
1489	MSTRG.126614.17	Chr15	0	1.04463	0	0	0	1083	357	570
1490	MSTRG.126614.18	Chr15	0.06829	0.277921	0.0695597	0	0.1071	1916	357	570
1491	MSTRG.126626.1	Chr15	0.103941	0.259258	3.80215	0.0724427	0	267	0	0
1492	MSTRG.126682.1	Chr15	6.18951	4.7174	2.2807	11.7203	2.01068	616	198	330
1493	MSTRG.126730.1	Chr15	18.3184	0.0117563	0.0465447	0.0146477	0	814	513	612
1494	MSTRG.126730.2	Chr15	3.28765	0.028601	0	0	0	808	507	606
1495	MSTRG.126741.1	Chr15	0.153748	0.0571787	0	0.0361807	0.00903967	635	381	480
1496	MSTRG.126746.1	Chr15	0.50605	0	0.0460543	0	0.138739	359	0	0
1497	MSTRG.126748.5	Chr15	0.662661	0	0.39178	0	0.119536	1700	1302	1440
1498	MSTRG.126767.22	Chr15	0.149169	0.209068	0.352444	0.295508	0.252823	876	0	111
1499	MSTRG.126796.1	Chr15	0.095363	0	0	0	0	252	0	0
1500	MSTRG.126851.1	Chr15	0.046882	0.261958	0.150238	0.176667	0.016153	357	12	66
1501	MSTRG.126864.1	Chr15	1.68178	0	0	0	0	247	63	93
1502	MSTRG.126877.11	Chr15	0.124822	0.649901	1.05064	0.231112	0.128663	2564	0	18
1503	MSTRG.126891.1	Chr15	0.45857	0	0.466516	0	0.178278	532	0	0
1504	MSTRG.126899.1	Chr15	0	0.0378183	0	0	0.0705617	353	0	0
1505	MSTRG.126909.1	Chr15	0.273189	0.131467	1.01549	0.00789833	0	1449	162	282
1506	MSTRG.126909.3	Chr15	0.172664	0	0.432414	0	0.021579	1289	162	366
1507	MSTRG.126909.4	Chr15	0.123465	0.0969927	0	0	0.0109953	1467	162	282
1508	MSTRG.126914.1	Chr15	0.302304	0.0208743	0.127197	0.260999	0.0283727	218	0	0
1509	MSTRG.126966.6	Chr15	0.270756	0	0.124631	0	0	1396	0	0
1510	MSTRG.126971.1	Chr15	0	0.0748397	0.00382033	0	0	1191	141	249
1511	MSTRG.126971.2	Chr15	0.083297	0	0.226792	0	0	1345	72	177
1512	MSTRG.126971.4	Chr15	0	0	0.450862	0	0	1279	72	177
1513	MSTRG.126980.1	Chr15	0.250531	0.713588	0.103676	0.263274	0	903	291	420
1514	MSTRG.126980.2	Chr15	0	0	0.0959087	0.130036	0	747	135	264
1515	MSTRG.126980.3	Chr15	0.254649	0.385268	0.0734197	0.024671	0	939	366	495
1516	MSTRG.126982.1	Chr15	0.001695	0.000810667	0.362414	0	0	1892	528	540
1517	MSTRG.126984.2	Chr15	0.126502	0	0.140225	0	0	492	0	0
1518	MSTRG.127000.1	Chr15	0.245655	0.159156	0.266527	0.0780337	0.0664283	563	219	228
1519	MSTRG.127005.1	Chr15	0	0.166469	0	0.102973	0	220	6	63
1520	MSTRG.127029.1	Chr15	0.339901	0	0	0	0	915	684	732
1521	MSTRG.127049.1	Chr15	0.0179103	0.610495	0.0830713	0.134314	0	3653	978	1080
1522	MSTRG.127055.2	Chr15	0.708326	0.111745	0	0.057923	0	4596	4245	4398
1523	MSTRG.127055.3	Chr15	0	0	0.0918527	0	0	4350	4086	4197
1524	MSTRG.127066.1	Chr15	0.145917	0.123087	0.167058	0.303716	0.068927	874	0	51
1525	MSTRG.127067.1	Chr15	0	0.0929217	0.138321	0	0.054344	515	159	165
1526	MSTRG.127090.1	Chr15	0	0.12248	0	0	0	206	0	0
1527	MSTRG.127091.1	Chr15	0.0928567	0	0	0	0	217	0	0
1528	MSTRG.127123.1	Chr15	0.0930517	0.950411	0.0242343	0.017849	0.244871	1503	1005	1065
1529	MSTRG.127123.2	Chr15	0	0.386363	0	0	0.14864	923	0	0
1530	MSTRG.127130.1	Chr15	0	0.116169	0	0	0	288	0	0
1531	MSTRG.127142.1	Chr15	8.81538	0.205756	0.334017	1.04972	0.032555	973	405	528
1532	MSTRG.127176.1	Chr15	0.00918167	0.0337337	0.08743	0	0.029344	489	0	0
1533	MSTRG.127189.2	Chr15	0.0894493	0	0	0	0	216	0	0
1534	MSTRG.127196.1	Chr15	0	0	0	0.149831	0	303	0	150
1535	MSTRG.12725.1	Chr01	0.00230133	0.948704	0.221836	2.05346	0.364568	942	150	234
1536	MSTRG.127250.1	Chr15	0	0.01145	0	0.0991507	0	207	0	0
1537	MSTRG.127274.3	Chr15	0	0.0790267	0	0.231822	0.148803	843	510	537
1538	MSTRG.127279.1	Chr15	0	0.964083	0.0195777	0.197821	0	347	156	192
1539	MSTRG.127319.17	Chr15	0.209791	0.294571	0.257187	0	0.0978613	376	0	0
1540	MSTRG.127321.1	Chr15	4.49052	0.88283	1.47984	0.011295	0.628793	270	0	0
1541	MSTRG.127322.3	Chr15	0.479106	0.561611	0.870543	0.634294	0.158208	1613	1224	1347
1542	MSTRG.127322.5	Chr15	0.0935693	0	0	0.0635383	0	999	549	648
1543	MSTRG.127329.1	Chr15	0.0471583	0.429723	0.042061	0.084812	0.014943	642	375	435
1544	MSTRG.127330.1	Chr15	0.0117597	0.015492	0	0	0.0766767	242	63	81
1545	MSTRG.127341.1	Chr15	0	0.131759	0	0	0	817	558	585
1546	MSTRG.127352.1	Chr15	0.077538	0	0	0	0	234	21	60
1547	MSTRG.127357.1	Chr15	0.0437023	0	0.092933	0	0.0226127	253	0	0
1548	MSTRG.127378.9	Chr15	0	0.235123	0	0	0	1895	39	129
1549	MSTRG.1274.1	Chr00	0.0417357	0.0414533	0.181507	0.0587783	0	444	0	12
1550	MSTRG.127452.1	Chr15	0.0889407	0.276132	0.095471	0.0197737	0.0584533	874	669	705
1551	MSTRG.127455.1	Chr15	0	0	0	0.0765393	0	310	36	156
1552	MSTRG.127480.1	Chr15	0.23862	0.513091	0.222231	0.247343	0.073026	471	204	318
1553	MSTRG.127486.2	Chr15	0.103472	0	0	0	0	319	60	123
1554	MSTRG.127508.1	Chr15	0.0990397	0.100659	0	0.027058	0.014748	614	420	450
1555	MSTRG.127532.2	Chr15	0	0.575992	0.00854533	0	0	1971	303	318
1556	MSTRG.127548.1	Chr15	0.009655	0.133359	0	0	0	693	321	453
1557	MSTRG.127548.2	Chr15	0	0	0	0	0.113805	530	198	309
1558	MSTRG.127555.1	Chr15	0	0.092941	0.0314173	0.0290783	0	549	0	0
1559	MSTRG.127558.2	Chr15	0.181892	0	0	0	0	390	222	228
1560	MSTRG.127560.3	Chr15	0.012566	0.166905	0.0207307	0.121877	0.051531	3703	3417	3546
1561	MSTRG.127560.4	Chr15	0.0114667	0.145642	0.016729	0.204479	0	3706	3420	3549
1562	MSTRG.127560.5	Chr15	0	0.501077	0.00195967	0.105551	0.00296833	2929	2463	2607
1563	MSTRG.127560.6	Chr15	0.488271	1.18926	0.0655167	0.645059	0.0226347	3664	2694	2856
1564	MSTRG.127560.7	Chr15	0.124598	0.228173	0.126352	0.373888	0	2852	1869	2010
1565	MSTRG.127560.8	Chr15	0.800408	0.026124	0.303486	0.0193913	0	1471	1200	1317
1566	MSTRG.127560.9	Chr15	0.345839	0.0314473	0.0594863	0.0250657	0	1158	696	855
1567	MSTRG.127589.18	Chr15	0	0.115299	0	0.096976	0	232	0	15
1568	MSTRG.127625.1	Chr15	0.085859	0.17082	0	0	0	349	39	96
1569	MSTRG.127637.1	Chr15	0.0199133	0.0359037	0.150424	0	0	1362	711	780
1570	MSTRG.127643.3	Chr15	0.102993	0.0163213	0.141329	0.092503	0.071416	1018	813	864
1571	MSTRG.127643.4	Chr15	0	0.120991	4.06667e-05	2.4e-05	0.00631033	507	87	210
1572	MSTRG.127643.5	Chr15	0.226651	0.254171	0.217948	0.0403973	0.105465	768	84	207
1573	MSTRG.127648.2	Chr15	0.07169	0.01871	0	0	0	508	0	114
1574	MSTRG.127671.1	Chr15	0.982469	0.451785	1.09874	0.579856	0.89988	1621	1281	1365
1575	MSTRG.127671.14	Chr15	0.338752	0.220805	0.53112	0.168242	0.101796	675	0	0
1576	MSTRG.127671.2	Chr15	0	1.20807	0.0990497	2.33082	0	603	333	417
1577	MSTRG.127690.7	Chr15	0.454904	0.572404	0.367255	0.768373	0.285707	1020	6	42
1578	MSTRG.127788.2	Chr15	0.083972	0	0	0	0	322	0	168
1579	MSTRG.127796.1	Chr15	0.043192	0.0581213	0.0973233	0.118349	0	742	534	576
1580	MSTRG.127801.2	Chr15	0.117854	0.0253567	0.120279	0.153635	0.0804243	686	117	225
1581	MSTRG.127808.1	Chr15	0.0117887	0.090091	0.19449	0.148636	0.00975767	1637	1308	1341
1582	MSTRG.127808.2	Chr15	0	0.0659767	0	0.039735	0	853	216	258
1583	MSTRG.127849.1	Chr15	0.317396	0.0320267	0.013887	1.67264	0.672205	994	42	120
1584	MSTRG.127872.2	Chr15	0	0.871113	0	0	0	787	273	405
1585	MSTRG.127953.1	Chr15	0	0	0	0.090673	0	210	0	0
1586	MSTRG.128025.4	Chr15	0.547615	0.397982	0.707789	1.29548	0.0854897	2130	1806	1926
1587	MSTRG.128049.2	Chr15	0.0661223	0.25818	0.159466	0.302926	0.050879	3251	2424	2520
1588	MSTRG.128084.2	Chr15	0.563648	0.851277	0.388049	1.32132	0.556565	317	33	84
1589	MSTRG.128092.1	Chr15	0.128189	0.0593157	0.236944	0.181675	0.0451287	1220	789	921
1590	MSTRG.128099.4	Chr15	0	0	0.0419237	0.0780097	0	2005	1530	1611
1591	MSTRG.128108.1	Chr15	0.203575	0.494541	0.407865	0.597126	0.0934877	3489	99	327
1592	MSTRG.128108.10	Chr15	0.0328783	0.00796133	0	0.266418	0	1839	126	210
1593	MSTRG.128108.2	Chr15	0.0423833	0.00494833	0.127129	6.66667e-07	0.232103	3284	114	342
1594	MSTRG.128108.3	Chr15	0.000304333	0.260527	0.00106733	0.0876257	0	1727	471	555
1595	MSTRG.128108.6	Chr15	0.869853	0.842393	0.651156	0.185256	0.280826	3085	114	342
1596	MSTRG.128108.7	Chr15	0.159795	0.204606	0.0394963	0.000489333	0.0140337	1326	276	360
1597	MSTRG.128108.9	Chr15	0	0.103553	0.124828	0.295183	0.00960033	3025	99	327
1598	MSTRG.128139.1	Chr15	0.213848	0	0.108487	0.141742	0	227	0	0
1599	MSTRG.128243.38	Chr15	0	0.396173	0	0.763376	0	1004	762	849
1600	MSTRG.128252.1	Chr15	0	0.470252	0	0	0	375	48	168
1601	MSTRG.128252.3	Chr15	0.00492433	0.107672	0.0126697	0.213143	0	295	102	141
1602	MSTRG.128316.1	Chr15	0.123524	0.0723117	0	0	0	287	0	132
1603	MSTRG.128344.1	Chr15	0.237952	0	0	0	0	776	525	537
1604	MSTRG.128360.1	Chr15	0.266393	0	0	0	0	425	114	243
1605	MSTRG.128360.2	Chr15	0.334736	0.0501077	0	0.0953717	0	429	111	216
1606	MSTRG.128368.1	Chr15	0.00965033	0.168037	0.0149703	0.0371	0	1614	372	603
1607	MSTRG.128368.3	Chr15	0.139835	0.102867	0.0846167	0	0	830	180	315
1608	MSTRG.128378.1	Chr15	0.168594	0.0157133	0	0.0269417	0	905	465	534
1609	MSTRG.128379.1	Chr15	0.419318	0.360606	0.125718	0.226332	0.0451707	351	0	0
1610	MSTRG.128379.2	Chr15	0.0217563	0	0.000514	0.0313943	0.165845	244	0	0
1611	MSTRG.128380.1	Chr15	0.066128	0.0633453	0.0742777	0.089454	0.0394603	414	177	261
1612	MSTRG.128381.1	Chr15	0.0397967	0.088476	0.0815357	0.0459947	0.009016	338	0	96
1613	MSTRG.128381.2	Chr15	0.20537	0.0136457	0.32853	0.020384	0.0869537	207	51	51
1614	MSTRG.128426.1	Chr15	0.130059	0	0.0211183	0	0	462	120	267
1615	MSTRG.128432.1	Chr15	0	32.0189	0.238068	65.1201	0	215	54	60
1616	MSTRG.128436.1	Chr15	0.558586	0	0	0	0	961	624	687
1617	MSTRG.128436.2	Chr15	0.259581	0	0	0	0	819	504	567
1618	MSTRG.128458.1	Chr15	0	0	0.190084	0	0	1058	498	651
1619	MSTRG.128491.13	Chr15	0	0.0435547	0	0.342493	0	2702	12	24
1620	MSTRG.128491.14	Chr15	0	0.035996	0	0.081251	0	942	15	57
1621	MSTRG.12850.2	Chr01	0	0	0.26367	0	0	1061	459	534
1622	MSTRG.128504.7	Chr15	0.0935307	0	0.0634387	0	0	892	345	483
1623	MSTRG.128534.1	Chr15	0.0112663	0.135777	0.256535	0.159537	0	1269	567	612
1624	MSTRG.12854.2	Chr01	0	0.173291	0	0.108712	0	370	27	108
1625	MSTRG.128543.1	Chr15	0	0.186276	0.0550337	0	0	393	141	237
1626	MSTRG.128577.1	Chr15	0.0826937	0.162894	0.0746193	0.138427	0.038819	384	180	228
1627	MSTRG.128582.1	Chr15	0	0.660106	0	0.397181	0	330	0	0
1628	MSTRG.128595.1	Chr15	0.762238	0	0.0912747	0	0.112776	358	57	66
1629	MSTRG.128660.1	Chr15	0.013871	1.55013	0.0187923	1.49466	0	427	12	72
1630	MSTRG.128660.2	Chr15	0	1.5888	0	1.00517	0	412	12	87
1631	MSTRG.128660.3	Chr15	0	0.169918	0.0286817	0.102478	0	758	447	480
1632	MSTRG.128660.4	Chr15	0.00142467	0.255395	0.003828	0.270136	0	753	441	447
1633	MSTRG.128660.5	Chr15	0.000246	1.24104	0.000828667	0.565596	0	621	384	465
1634	MSTRG.128660.6	Chr15	0	0.0593823	0	0.013741	0	381	0	60
1635	MSTRG.128665.1	Chr15	0	0.127914	0	0	0	474	279	318
1636	MSTRG.128667.1	Chr15	0	0	0	0.220056	0	856	345	474
1637	MSTRG.128667.2	Chr15	0	0	0	0.175823	0	203	0	48
1638	MSTRG.128696.1	Chr15	0.594212	0.056679	0.296917	0.0895457	0.511836	374	57	123
1639	MSTRG.128756.6	Chr15	0.0268037	0.159167	0.008339	0.0395043	0	402	6	39
1640	MSTRG.128787.12	Chr15	0	0	0	0	0.060348	1036	489	705
1641	MSTRG.128787.20	Chr15	0	0.070922	0	0.0222833	0	953	0	105
1642	MSTRG.128787.8	Chr15	0.008837	0.109074	8.33333e-06	0.152125	0.048177	6546	2523	2682
1643	MSTRG.128800.1	Chr15	0.00613767	0.841453	0.302826	0.207517	0.0433777	1045	597	648
1644	MSTRG.128829.1	Chr15	0	0.0813063	0	0	0	513	234	357
1645	MSTRG.128844.1	Chr15	0	1.05391	0.011455	0.671019	0	958	525	546
1646	MSTRG.128862.2	Chr15	0	0.387623	0	0.768757	0	1425	1158	1242
1647	MSTRG.128862.3	Chr15	0.974859	0.464416	1.01441	0.936356	0.867153	1345	306	438
1648	MSTRG.128868.4	Chr15	0.0628457	0.0159557	0.0101923	0.017814	0.00282933	398	123	180
1649	MSTRG.128884.1	Chr15	0.022295	0.0690323	0	0.107257	0.01543	294	0	27
1650	MSTRG.128895.2	Chr15	0.073341	0.104069	0.0125427	0.0156103	0.0744247	1310	0	141
1651	MSTRG.128895.3	Chr15	0.316423	0.032764	0.0621027	0	0.013699	676	405	510
1652	MSTRG.128917.2	Chr15	0	0.045894	0	0	0	264	66	108
1653	MSTRG.12896.8	Chr01	0	0	0.0617893	0	0	442	69	261
1654	MSTRG.128974.1	Chr15	0.0115567	0.012502	0.0716383	0.0139557	0.00239167	217	18	60
1655	MSTRG.128979.1	Chr15	0	0.266252	0.0252723	0.0847663	0.003175	452	138	264
1656	MSTRG.128985.1	Chr15	0	0.111131	0	0.0269777	0	318	9	15
1657	MSTRG.128985.2	Chr15	0.105241	0.142297	0.167349	0.166229	0.02305	328	51	126
1658	MSTRG.128986.1	Chr15	0.217069	0.11539	0.445074	0.0635597	0.0416693	341	63	102
1659	MSTRG.128986.2	Chr15	0.182676	0.044897	0.076423	0.010647	0.0734987	308	30	69
1660	MSTRG.128988.3	Chr15	0	0	0	0	0.14598	363	30	210
1661	MSTRG.1290.1	Chr00	0.0960573	0.010956	0.0550107	0.048339	0	615	330	390
1662	MSTRG.129021.1	Chr15	0.54072	0.543085	0.747766	0.696625	0.200445	440	0	0
1663	MSTRG.129022.1	Chr15	0	0.0874053	0	0	0	208	33	54
1664	MSTRG.12903.2	Chr01	0	0	0.020193	0	0.188016	882	15	147
1665	MSTRG.129090.9	Chr15	0	0.124206	0	0	0	1195	411	435
1666	MSTRG.129108.1	Chr15	0.15189	0.120323	0.042381	0.186171	0.082397	1148	51	147
1667	MSTRG.129108.3	Chr15	0.0865453	0.0498643	0.114324	0.036654	0.112336	1107	42	138
1668	MSTRG.129108.4	Chr15	0.108406	0.106248	0.126989	0.207355	0.075747	1397	42	162
1669	MSTRG.129130.1	Chr15	0.0106213	0	0	0.132592	0	607	375	450
1670	MSTRG.129147.23	Chr15	0.545152	0.898626	1.38356	0.00197167	0.104512	653	42	87
1671	MSTRG.129149.19	Chr15	0.100266	0.107771	0.0575477	0	0.0367713	553	54	114
1672	MSTRG.129153.3	Chr15	0.0406753	0.059265	0.00598233	0.15325	0.013815	227	27	72
1673	MSTRG.129154.1	Chr15	0.336372	0.495464	0.165226	0.525612	0.21119	357	0	51
1674	MSTRG.129154.2	Chr15	0.27537	0.0978087	0.163983	0.186061	0.164194	329	159	174
1675	MSTRG.129156.1	Chr15	0.550809	0.564718	0.551429	0.0251567	0.587407	210	33	57
1676	MSTRG.12920.1	Chr01	0	0.100679	0	0	0	208	0	21
1677	MSTRG.129202.2	Chr15	0	0.286674	0	0.150989	0	352	27	54
1678	MSTRG.129205.1	Chr15	0.064036	0.0902487	0.156793	0.0326697	0.0344797	495	0	0
1679	MSTRG.129242.11	Chr15	0	0.19437	0	0.343917	0	1827	1182	1299
1680	MSTRG.129242.2	Chr15	0	0.043429	0	0.020564	0	2725	1983	2106
1681	MSTRG.129242.6	Chr15	0	0.0589893	0.014345	0	0.0111873	2988	2550	2673
1682	MSTRG.129242.8	Chr15	0	0.0486897	0	0.0927983	0	1123	483	600
1683	MSTRG.129269.1	Chr15	0.119927	0.10919	0.0391847	0	0.00734367	306	42	126
1684	MSTRG.129277.2	Chr15	0	0	0	0.0710333	0	1960	1155	1230
1685	MSTRG.129286.1	Chr15	0.675878	5.66689	0.492286	1.16156	0.551718	362	0	6
1686	MSTRG.129321.1	Chr15	0	0.763985	0	0.216186	0	518	150	291
1687	MSTRG.129322.1	Chr15	0.057307	0	0	0	0	216	54	60
1688	MSTRG.129327.20	Chr15	0	0.305166	0.006396	0.447787	0	1804	1212	1242
1689	MSTRG.129330.1	Chr15	0.0285143	0.0611537	0.455907	0.125073	0.014886	516	219	360
1690	MSTRG.129382.1	Chr15	0	0	0.075612	0	0	213	0	0
1691	MSTRG.129385.1	Chr15	0	0.057163	0	0	0	376	186	219
1692	MSTRG.129394.2	Chr15	0	0.052985	0	0	0	203	0	48
1693	MSTRG.129401.1	Chr15	0.017484	0	0.263482	0	0	313	0	0
1694	MSTRG.129405.26	Chr15	0.162306	0.00882167	0.282648	0.0626617	0.25583	694	30	192
1695	MSTRG.129413.1	Chr15	0.0147307	0.241897	0	0	0	1313	681	804
1696	MSTRG.129414.2	Chr15	0.110359	0.0295397	0.217614	0.0559923	0.00691333	1190	936	1035
1697	MSTRG.129416.1	Chr15	0	0	0	0.057521	0	204	0	0
1698	MSTRG.129419.1	Chr15	0	0.125975	0.032318	0.055766	0.0259687	695	411	510
1699	MSTRG.129419.2	Chr15	0.00648333	0.108895	0.142996	0.0653827	0.00936	662	135	507
1700	MSTRG.129420.1	Chr15	0.092567	0	0	0.0210137	0	270	0	0
1701	MSTRG.129453.1	Chr15	0.14737	0.155797	0.28476	0.245178	0.0480847	494	72	93
1702	MSTRG.129455.1	Chr15	0.12626	0	0	0	0	254	0	42
1703	MSTRG.129460.1	Chr15	0.00164233	0.188189	0	0.271937	0	2813	234	417
1704	MSTRG.129460.12	Chr15	0.0567763	0	0.403384	0	0	2248	933	1086
1705	MSTRG.129460.2	Chr15	0.0218257	0.059115	0	0.0149107	0	2761	2328	2493
1706	MSTRG.129460.3	Chr15	0.0364577	0.297417	0.014934	0.443996	0	2685	234	417
1707	MSTRG.129462.1	Chr15	0.008569	0.0721903	0	0.076441	0.27793	1021	717	858
1708	MSTRG.129469.1	Chr15	0.00913467	0.003609	0.215527	0	0	778	138	141
1709	MSTRG.129479.1	Chr15	0.300682	0.246304	0.0422193	0	0.364655	941	0	0
1710	MSTRG.129479.2	Chr15	0.353606	0.662931	0.134423	0.0828653	0.080178	1442	351	408
1711	MSTRG.129479.3	Chr15	0.142176	0.086634	0.0637197	0.0199083	0.0376257	1425	381	453
1712	MSTRG.129479.5	Chr15	0	0	0.116495	0	0	1222	153	210
1713	MSTRG.129479.6	Chr15	0.321426	0.137719	0.301655	0.0139553	0.441297	462	0	0
1714	MSTRG.129479.7	Chr15	0.152819	0	0.173027	0	0	800	330	387
1715	MSTRG.129489.1	Chr15	0.0632063	0.0147363	0	0	0	204	12	48
1716	MSTRG.129522.1	Chr15	0	0.0476313	0	0.315008	0	1024	225	306
1717	MSTRG.129526.1	Chr15	0	0.0527277	0.040183	0	0.220071	395	9	33
1718	MSTRG.129527.6	Chr15	0	0.002303	0.0517963	0.088565	0	222	0	66
1719	MSTRG.129528.2	Chr15	0.0172707	0.0380353	0	0	0	753	63	78
1720	MSTRG.129566.2	Chr15	0	0	0.215979	0	0	217	0	0
1721	MSTRG.12957.1	Chr01	0.168842	0.71582	1.61466	0.0752813	0	968	705	741
1722	MSTRG.129582.1	Chr15	0.186454	0.0862403	0.129671	0.002129	0.128142	323	72	126
1723	MSTRG.129614.1	Chr15	0	0	0.157173	0	0	400	111	246
1724	MSTRG.129618.1	Chr15	0	0	0	0.132018	0	287	0	0
1725	MSTRG.129636.1	Chr15	0.00965967	0	0.537343	0	0	332	21	102
1726	MSTRG.129663.1	Chr15	0.01377	0	0.26773	0	0.00861067	645	324	444
1727	MSTRG.129663.2	Chr15	0.0107257	0	0.191292	0.021784	0.00349967	821	480	618
1728	MSTRG.129663.3	Chr15	0.141437	0.002634	0.223201	0	0.0551657	501	210	294
1729	MSTRG.129663.4	Chr15	0.0668467	0	0.149276	0	0.0694893	500	294	318
1730	MSTRG.129713.1	Chr15	0	0.0672347	0	0.032243	0	506	0	84
1731	MSTRG.129720.1	Chr15	0.0579033	0.0736587	0.021747	0.280254	0.0183237	818	588	606
1732	MSTRG.129720.2	Chr15	0.125584	0.742505	0.186096	0.138493	0.103171	385	156	174
1733	MSTRG.129723.10	Chr15	0.162628	0.606038	0.208826	0.0698397	0.0152277	727	3	165
1734	MSTRG.129723.11	Chr15	1.01859	1.87163	1.35588	0.643398	0.026523	380	3	165
1735	MSTRG.129723.2	Chr15	0	0.140137	0	0.253893	0.000172	828	387	498
1736	MSTRG.129723.4	Chr15	0.006344	0.083279	0.014716	0.00376033	0.004347	482	0	174
1737	MSTRG.129723.5	Chr15	0.160369	0.707839	0.439793	0.684197	0.064168	593	0	48
1738	MSTRG.129723.6	Chr15	0.143195	0.17841	0	0.102419	4.03333e-05	399	0	48
1739	MSTRG.129723.7	Chr15	0.061666	0.15267	0.0652547	0.0897563	0.00449833	1282	0	45
1740	MSTRG.129723.9	Chr15	0.020326	0.051942	0.0537483	0.0685727	0.001933	696	21	123
1741	MSTRG.129724.1	Chr15	0	0.109569	0	0.0106883	0	259	0	0
1742	MSTRG.129764.1	Chr15	0.0428143	0.103007	0.0635637	0.20653	0.0714743	586	63	171
1743	MSTRG.129764.2	Chr15	0.0347143	0.0820017	0	0.026496	0.0176133	253	0	0
1744	MSTRG.129783.2	Chr15	0.012893	0.116218	0.00430833	0	0	375	201	219
1745	MSTRG.129790.4	Chr15	0	0.0355557	0.06142	0	0	464	27	150
1746	MSTRG.12980.1	Chr01	0.306045	0	0	0	0	441	219	288
1747	MSTRG.129836.1	Chr15	0.353968	0	0.256826	0.00137333	0.094728	926	21	72
1748	MSTRG.129836.2	Chr15	0.204796	0	0.0253047	0	0.219295	300	18	33
1749	MSTRG.129863.1	Chr15	0	0.010586	0	0.0554493	0	231	36	51
1750	MSTRG.129868.1	Chr15	0.167713	0.245136	0.239107	0.217838	0.0843853	735	36	162
1751	MSTRG.129886.2	Chr15	0	0	0	0.211365	0	518	339	363
1752	MSTRG.129889.1	Chr15	0.16396	0	0.106554	0	0.575456	440	0	60
1753	MSTRG.129890.1	Chr15	0.00490433	0.183857	0	0.193544	0.000272333	246	3	3
1754	MSTRG.129892.1	Chr15	0.212913	0.109114	0.137171	0.01099	0.109446	264	0	111
1755	MSTRG.129912.1	Chr15	0.0399087	0.161203	0	0.156714	0	349	0	45
1756	MSTRG.129919.1	Chr15	0.283886	0.157979	0.08431	0.151773	0.08048	519	0	0
1757	MSTRG.129933.1	Chr15	0.070829	0.044055	0.150175	0.32034	0	1340	843	960
1758	MSTRG.129933.2	Chr15	0.0493423	0.0583837	0.055033	0.0690343	0	652	345	399
1759	MSTRG.129954.1	Chr15	0	0	0	0	13.6016	1092	672	765
1760	MSTRG.130000.1	Chr15	0.118304	0	0.0570037	0	0	1378	471	711
1761	MSTRG.130022.1	Chr15	0.335534	0.0368877	0.188598	0	0.015727	275	84	120
1762	MSTRG.130022.2	Chr15	0.284528	0	0.305351	0	0.015959	271	0	60
1763	MSTRG.130035.1	Chr15	0.895006	1.35691	4.64597	2.46331	1.69188	243	0	0
1764	MSTRG.130037.1	Chr15	0.000505333	0.244028	0.150022	0.043259	0.0264213	283	15	33
1765	MSTRG.130037.2	Chr15	0.150459	0.0859783	0.724572	0.0342873	0.071847	466	0	96
1766	MSTRG.130037.3	Chr15	0.0717867	0.0118063	0.14842	0.00704033	0	326	0	75
1767	MSTRG.130037.4	Chr15	0.0793953	0.0113797	0.09816	0.0406957	0	318	0	33
1768	MSTRG.130037.5	Chr15	0.149659	0.0368723	0.384231	0.0147477	0.0232213	322	18	36
1769	MSTRG.130121.1	Chr15	0.221989	0	0.0691583	0.00985367	0.0154117	400	12	57
1770	MSTRG.130138.1	Chr15	0.00847133	7.42835	0.292119	11.4999	0.025868	258	48	105
1771	MSTRG.130139.1	Chr15	0	0.610125	0	0.069035	0.0383587	230	39	75
1772	MSTRG.130140.1	Chr15	0.056449	0	0	0	0	217	12	57
1773	MSTRG.130144.1	Chr15	0.059115	0.0153863	0	0	0	217	0	63
1774	MSTRG.13018.2	Chr01	0	0	0	0	0.0452333	214	0	18
1775	MSTRG.130241.1	Chr15	0.493244	0.221093	0.303513	0.267577	0.00702967	3337	2244	2364
1776	MSTRG.130250.1	Chr15	0.283842	0.099439	0.0997437	0.133104	0	1936	1194	1308
1777	MSTRG.130258.18	Chr15	0.586298	0.711042	0.658491	0.614322	0.072811	579	18	21
1778	MSTRG.130258.21	Chr15	0.0798723	0.243217	0.0303977	0.248977	0	310	39	102
1779	MSTRG.130267.2	Chr15	0.031882	0.065027	0	0.034014	0.008282	643	285	435
1780	MSTRG.1303.1	Chr00	0.134393	0.024925	0.00971	0.0388137	0	575	138	264
1781	MSTRG.130464.1	Chr16	0	0.0469107	0	0.0783813	0	337	156	180
1782	MSTRG.13052.1	Chr01	0.318471	0.617602	0.202147	0.351061	0.0965933	400	0	0
1783	MSTRG.130525.1	Chr16	0.0232997	0	0.0686743	0.144538	0	245	42	90
1784	MSTRG.130649.1	Chr16	0	0.105829	0.0428703	0.0628123	0	1207	375	474
1785	MSTRG.130682.1	Chr16	0.165913	0	0	0.0157607	0	377	0	39
1786	MSTRG.130702.1	Chr16	0	8.41846	0.024446	10.0962	0.003755	352	51	198
1787	MSTRG.130714.1	Chr16	0	0	0.048239	0	0	234	0	0
1788	MSTRG.130764.1	Chr16	0	0	0	0.051963	0	244	42	51
1789	MSTRG.130803.1	Chr16	0.138288	0.047933	0.108075	0.028523	0.0160707	253	69	99
1790	MSTRG.130803.2	Chr16	0.131878	0.0443587	0.11355	0.0629713	0.0746237	345	15	174
1791	MSTRG.13085.1	Chr01	0.158367	0.242087	0.0140943	0.079222	0.153751	241	0	84
1792	MSTRG.130922.2	Chr16	0	0	0	0	0.0914133	234	24	81
1793	MSTRG.130948.2	Chr16	0.206237	0	0	0	0	719	102	195
1794	MSTRG.130976.6	Chr16	0	0	0.0934123	0.0465513	0	274	12	90
1795	MSTRG.13100.2	Chr01	0.853839	0.0143657	0.748428	0.0308867	0.253273	2500	2178	2322
1796	MSTRG.13100.6	Chr01	0	2.18247	0	1.54589	0	2294	2025	2139
1797	MSTRG.131003.1	Chr16	0	3.70098	0	0.0211563	0	621	399	465
1798	MSTRG.131008.1	Chr16	0.016552	0.274643	0.218297	0.142602	0.005663	3106	1731	1785
1799	MSTRG.131008.2	Chr16	0	0.26539	0.161205	0.0743307	0	2046	873	1095
1800	MSTRG.131008.3	Chr16	0	0.0235793	0.032336	0.193447	0	1001	0	9
1801	MSTRG.131008.4	Chr16	0	0.049073	0.007861	0.209691	0	1075	495	678
1802	MSTRG.131008.5	Chr16	0	0.0290283	0.112007	0	0	909	345	447
1803	MSTRG.131008.6	Chr16	0	0.200499	0.294752	0.11933	0	1489	186	456
1804	MSTRG.131008.7	Chr16	0	0.145318	0.019813	0.0284757	0	1614	183	291
1805	MSTRG.131008.8	Chr16	0.00596933	2.28864	0.959975	1.93601	0.015965	1080	321	375
1806	MSTRG.131031.1	Chr16	0.170512	0.418047	0.177556	0.046782	0	379	0	0
1807	MSTRG.131035.1	Chr16	0	0	0	0.123432	0	214	0	51
1808	MSTRG.131073.1	Chr16	0.063634	0.0775813	0	0.013328	0	374	120	219
1809	MSTRG.1311.1	Chr00	0	0.0276333	0.128274	0	0	218	0	0
1810	MSTRG.131103.1	Chr16	0	0.156512	0	0.023863	0	222	0	0
1811	MSTRG.131124.2	Chr16	0	0.537179	0.0238147	0.358365	0	1563	843	894
1812	MSTRG.131124.4	Chr16	1.66667e-06	0.786317	0.00022	0.117053	0	1377	1137	1221
1813	MSTRG.131124.9	Chr16	0	0.118588	0	0	0	1282	573	624
1814	MSTRG.131133.1	Chr16	0.597922	0	0	0	0	706	72	102
1815	MSTRG.131198.1	Chr16	6.17802	6.95316	4.2503	15.2159	13.9333	1147	753	870
1816	MSTRG.131202.1	Chr16	0	0.25946	0	0.0745973	0	764	228	369
1817	MSTRG.131286.2	Chr16	0	0.104999	0.09309	0.0156393	0	213	60	60
1818	MSTRG.131332.1	Chr16	0	0.026851	0.0736463	0	0	231	30	78
1819	MSTRG.131349.5	Chr16	0.12054	0	0	0.0679993	0	231	18	75
1820	MSTRG.131436.2	Chr16	2.33916	0.002559	0.422344	0	0	487	0	135
1821	MSTRG.131440.1	Chr16	0.015397	0	0.147669	0	0	390	117	162
1822	MSTRG.131447.2	Chr16	0	0	0	0.086013	0	469	0	276
1823	MSTRG.131452.5	Chr16	0.129635	0	0.025969	0	0.134777	326	0	87
1824	MSTRG.131464.1	Chr16	0.018214	0.0721897	0.0397677	0.195039	0.0132363	480	312	324
1825	MSTRG.131512.1	Chr16	0.0104217	0.0143537	0	0.02652	0.0597593	404	162	219
1826	MSTRG.131546.1	Chr16	0	0	0	0.0882823	0	235	0	0
1827	MSTRG.131631.1	Chr16	0	0	0.0603857	0	0	503	201	294
1828	MSTRG.131634.1	Chr16	13.662	3.30721	11.4088	5.19336	1.64437	1097	810	942
1829	MSTRG.13166.1	Chr01	0	0	0	0.0980587	0	389	0	0
1830	MSTRG.131697.3	Chr16	0	0	0	0.0697427	0	388	15	33
1831	MSTRG.131697.5	Chr16	0.061007	0.0113933	0.0174417	0	0	261	33	105
1832	MSTRG.13175.1	Chr01	0.0776093	0	0.048833	0	0.063689	397	0	15
1833	MSTRG.131759.2	Chr16	0	0.195939	0	0.0910057	0	1676	3	69
1834	MSTRG.131759.3	Chr16	0	0.0494473	0	0	0	639	30	135
1835	MSTRG.13176.1	Chr01	0.0922623	0.205258	0.354466	0.347547	0.0890103	396	0	0
1836	MSTRG.131788.2	Chr16	0	0	0	0	0.093342	549	0	0
1837	MSTRG.131815.1	Chr16	0.116061	0.539664	0.351813	0.453943	0.0632387	2387	204	321
1838	MSTRG.131815.2	Chr16	0	0.039452	0	0.115454	0	987	222	267
1839	MSTRG.131854.1	Chr16	0.0313657	0.0348207	0.0846163	0.038932	0.0331603	276	0	120
1840	MSTRG.131890.2	Chr16	0.219308	0.173094	0.043736	0.046089	0	913	81	543
1841	MSTRG.131900.1	Chr16	0.0746123	0	0.117903	0.0137427	0	929	378	495
1842	MSTRG.131974.1	Chr16	0.0246297	0.00726833	0.024366	0.0746177	0	250	0	96
1843	MSTRG.13199.1	Chr01	0.127167	0.010056	0.104725	0.00933233	0.00701267	2821	807	870
1844	MSTRG.132024.1	Chr16	0	0	0.327763	0	0	1990	996	1071
1845	MSTRG.132049.1	Chr16	0	0	0	0.0584763	0	587	171	255
1846	MSTRG.132050.10	Chr16	0.065698	0.348737	0.254224	0.226161	0.0713337	1754	498	618
1847	MSTRG.132050.12	Chr16	0.0530213	0.139154	0.599841	1.08331	0.0469047	3297	2838	3003
1848	MSTRG.132050.2	Chr16	0.0418607	0.995139	0.71821	0.67039	0.147542	1492	555	723
1849	MSTRG.132050.3	Chr16	0.0261063	0.120199	0.056902	0.0288713	0.025685	1489	555	720
1850	MSTRG.132050.8	Chr16	0	0.125828	0	0.0391317	0	1312	573	693
1851	MSTRG.132073.1	Chr16	0.0686883	0	0	0	0	466	57	174
1852	MSTRG.13208.1	Chr01	0	0.143113	0.0119347	0	0	263	0	3
1853	MSTRG.13211.1	Chr01	0.0441467	0.035446	0	0	0.0635087	227	0	0
1854	MSTRG.13211.2	Chr01	0.0550333	0.327899	0.193537	0.208202	0.0282783	523	303	366
1855	MSTRG.132166.1	Chr16	0.158454	0	0	0	0.0153153	836	282	384
1856	MSTRG.132192.5	Chr16	0.0408047	0.0854767	0.0693537	0.0791077	0.0256863	793	0	69
1857	MSTRG.132199.2	Chr16	0.00296	0.200618	0.172535	0	0.000184333	2178	1620	1713
1858	MSTRG.132201.1	Chr16	2.66736	0.0132317	3.83063	0	0	1560	1167	1272
1859	MSTRG.132201.2	Chr16	0.249694	0.00165467	0.596869	0	0	1298	903	1008
1860	MSTRG.132201.3	Chr16	0.691221	0.0233267	0.918521	0	0	1294	900	1005
1861	MSTRG.132205.1	Chr16	0.061755	0	0.037123	0	0	366	9	96
1862	MSTRG.132216.1	Chr16	1.56048	0.946428	0.818578	2.50781	0.045722	2987	687	777
1863	MSTRG.132216.2	Chr16	0.936775	2.14857	0.209975	1.1398	0.061093	2009	777	1086
1864	MSTRG.13222.1	Chr01	0.0225507	0.0141533	0	0.127941	0	317	66	78
1865	MSTRG.132229.1	Chr16	0.29267	0	0	0	0	406	24	180
1866	MSTRG.132280.1	Chr16	0.062578	0.0371723	0.058061	0.113883	0	352	6	72
1867	MSTRG.132283.1	Chr16	0.228055	0.0164713	0.0578	0.117711	0.0389417	291	0	48
1868	MSTRG.132283.2	Chr16	0.0881117	0.0746007	0.00307867	0.0767747	0.153844	249	0	6
1869	MSTRG.132283.3	Chr16	0.0185197	0.246337	0.154671	0.537819	0.0155137	609	0	0
1870	MSTRG.132316.1	Chr16	0.343047	0.058959	0.0616333	0.412961	0.114089	1187	963	1032
1871	MSTRG.13233.1	Chr01	0	0.429906	0	0.164888	0	430	0	0
1872	MSTRG.132356.12	Chr16	0.0417997	0.0318427	0.0499353	0.0486797	0.0622037	1136	603	744
1873	MSTRG.132365.2	Chr16	0	0.078967	0	0.100203	0.121122	526	273	372
1874	MSTRG.132465.16	Chr16	0	0.161732	0	0.326698	0.0148213	1338	360	405
1875	MSTRG.132465.20	Chr16	0	0.0800417	0	0	0	960	630	702
1876	MSTRG.13248.1	Chr01	0	0.066598	0	0	0	377	0	0
1877	MSTRG.132564.1	Chr16	0.0726967	0.015285	0.474799	0.011509	0.0387777	259	3	105
1878	MSTRG.132588.1	Chr16	0	0.135926	0	0.461397	0	623	0	0
1879	MSTRG.132653.1	Chr16	0.086605	0.0890287	0.050503	0.107531	0.602588	1615	1404	1458
1880	MSTRG.132653.2	Chr16	0.00334367	0.0351977	0	0.149217	1.4405	993	18	108
1881	MSTRG.132653.3	Chr16	0.0171403	0	0	0	0.520943	1508	93	186
1882	MSTRG.132653.4	Chr16	0	0.0516467	0.079192	0.2193	1.95488	1381	438	471
1883	MSTRG.132653.6	Chr16	0.0357733	0.027672	0	0.165612	0.751396	612	0	63
1884	MSTRG.132653.7	Chr16	0	0.0399507	0	0.020469	4.46782	1093	432	465
1885	MSTRG.132685.1	Chr16	0	0	0.0609283	0	0	223	36	69
1886	MSTRG.132697.1	Chr16	0.134368	0	0	0	0	233	0	45
1887	MSTRG.132748.2	Chr16	0.0684443	0	0	0	0	514	99	195
1888	MSTRG.132748.3	Chr16	0	0.150089	0	0	0	370	30	120
1889	MSTRG.132749.1	Chr16	0.21778	17.9878	0.133786	12.0845	0.149942	860	417	507
1890	MSTRG.132749.2	Chr16	0	0.774805	0.084231	4.27033	0	808	198	270
1891	MSTRG.132764.1	Chr16	0.0778143	0.172258	0.165172	0.113467	0	1140	489	669
1892	MSTRG.132764.2	Chr16	0.273452	0.060738	0.066867	0.123254	0	1396	240	420
1893	MSTRG.132764.3	Chr16	0.205148	0.545615	0.546066	1.31431	0.0327023	1096	138	318
1894	MSTRG.132841.1	Chr16	0.740918	0.895488	1.36139	0.556347	1.25317	927	456	588
1895	MSTRG.132841.2	Chr16	1.9933	0.941615	1.27309	0.00822167	0.0298423	1139	696	813
1896	MSTRG.132848.1	Chr16	0	0.063986	0	0	0	222	0	66
1897	MSTRG.132865.1	Chr16	0	0.186386	0	0	0.0248307	1362	30	243
1898	MSTRG.132865.2	Chr16	0.0183743	0.172944	0	0	0.000504667	2029	30	243
1899	MSTRG.132913.1	Chr16	0	0.289965	0	0.0465163	0	617	279	462
1900	MSTRG.133019.1	Chr16	0	0	0.127578	0	0	213	0	60
1901	MSTRG.133038.1	Chr16	0	0.175779	0	0.701987	0.576032	1787	1107	1185
1902	MSTRG.133038.2	Chr16	0.0556597	0.134751	0.0319267	0.165587	0.147255	1787	1107	1185
1903	MSTRG.133038.3	Chr16	0	0.0213687	0	0.349855	0.302572	285	3	21
1904	MSTRG.133038.4	Chr16	0	0.816738	0	2.55695	0.272538	1136	348	408
1905	MSTRG.133038.5	Chr16	0	1.05478	0.00796433	2.15076	0.764745	1136	348	408
1906	MSTRG.133038.6	Chr16	0	0.956534	0	1.7749	0.214953	1136	348	408
1907	MSTRG.133038.7	Chr16	0	0.326477	0	0.181509	0.827677	1133	345	405
1908	MSTRG.133050.3	Chr16	0.31575	0.233471	0.448134	0.123897	0.0634227	2244	1278	1455
1909	MSTRG.133079.1	Chr16	1.14019	1.19757	0.345309	0.562327	0	586	180	303
1910	MSTRG.133079.3	Chr16	0	0	0.203667	0.0858993	0	393	72	120
1911	MSTRG.133079.4	Chr16	0.005928	0.0114407	0.0499947	0	0	230	0	0
1912	MSTRG.133085.14	Chr16	0	0	0.079546	0	0	362	0	45
1913	MSTRG.13309.1	Chr01	0.101845	0	0	0.0214013	0	253	0	24
1914	MSTRG.133091.1	Chr16	0.29726	1.16979	0.230078	0.0239633	0	510	114	129
1915	MSTRG.133091.2	Chr16	0.079455	0.312273	0.098339	0.0339153	0	381	90	105
1916	MSTRG.133103.1	Chr16	6.19059	4.34909	6.43702	0.420707	0.0288083	704	264	285
1917	MSTRG.133103.2	Chr16	1.05458	0.953189	1.16062	0.0523643	0.0159403	704	264	285
1918	MSTRG.133103.3	Chr16	0.322486	0.304931	0.0613243	0.0115607	0	529	258	279
1919	MSTRG.133110.1	Chr16	0	0.046776	0.00596033	0.0144313	0.0113313	1181	519	528
1920	MSTRG.133114.1	Chr16	0	0	0.199693	0	0.012176	592	168	180
1921	MSTRG.133116.1	Chr16	0.008558	0	0	0.0570567	0	226	39	72
1922	MSTRG.133119.1	Chr16	0.093318	0.0363367	0	0	0	489	231	324
1923	MSTRG.133122.1	Chr16	0.102289	0	0	0	0	1381	843	936
1924	MSTRG.133122.2	Chr16	0.0984217	0.003214	0	0	0	1470	843	936
1925	MSTRG.133122.3	Chr16	0.15356	0	0.00410667	0	0	1400	108	159
1926	MSTRG.133128.1	Chr16	0.007337	0.08251	0.0584433	0.109946	0.0801023	277	66	120
1927	MSTRG.13313.1	Chr01	0.0438133	1.00319	0.0283517	2.46178	0.789075	1087	396	453
1928	MSTRG.13313.12	Chr01	0.00141233	0.02595	0	0.203199	0.628332	492	0	84
1929	MSTRG.13313.3	Chr01	0	0.037729	0.022811	0.2341	0.160625	1084	393	450
1930	MSTRG.133174.1	Chr16	0.119654	0	0	0	0	651	0	111
1931	MSTRG.133216.1	Chr16	0.0356173	0.0740283	0.353864	0	0	547	51	168
1932	MSTRG.133217.2	Chr16	1.42656	5.89553	1.69839	2.434	2.55494	963	318	354
1933	MSTRG.133217.3	Chr16	0.043485	0.147901	0.168301	0.395562	0.147889	689	270	306
1934	MSTRG.133217.4	Chr16	0.116161	0	0	0.0181993	0.090573	627	270	306
1935	MSTRG.133217.5	Chr16	0.0364383	0.329232	0	0.004232	0	723	270	306
1936	MSTRG.133255.1	Chr16	0	0	0.34352	0	0	755	414	420
1937	MSTRG.133317.1	Chr16	0.076221	0.018354	0	0	0	716	258	384
1938	MSTRG.133317.2	Chr16	0.0589853	0.202577	0	0	0	286	0	0
1939	MSTRG.133317.3	Chr16	0.075911	0.768834	0.022474	0	0.0411563	1278	111	258
1940	MSTRG.133371.2	Chr16	0	0.266097	0	0	0	734	327	516
1941	MSTRG.133372.2	Chr16	0.0151363	2.09289	0.0581383	2.93143	0.00891133	360	0	0
1942	MSTRG.133417.2	Chr16	0.120856	0.301683	0.00305333	0	0.158253	2794	2445	2556
1943	MSTRG.133417.3	Chr16	0.0463943	0.226999	0.00466833	0	0.176933	755	405	516
1944	MSTRG.133417.4	Chr16	0.066971	0.108586	0.00121167	0	0.278076	946	597	708
1945	MSTRG.133417.5	Chr16	0.0136027	0.0637067	0.0104473	0	0.0953257	672	324	435
1946	MSTRG.133417.6	Chr16	0.109751	0.137941	0.00486533	0	0.0825887	913	564	675
1947	MSTRG.133465.3	Chr16	0	0.0420127	0	0	0	694	0	0
1948	MSTRG.133482.2	Chr16	0.005812	0.0875583	0.192202	0.0781423	0	933	0	246
1949	MSTRG.133572.1	Chr16	0.208844	0.0249723	0.12627	0.0316337	0.017093	623	285	399
1950	MSTRG.133585.1	Chr16	0	0.0753773	0	0.0680547	0	219	0	0
1951	MSTRG.133603.1	Chr16	0.170078	0.139277	0.24977	0.183038	0	275	0	0
1952	MSTRG.133607.1	Chr16	7.27204	0.811259	4.09026	0.359193	0.0383577	1032	0	69
1953	MSTRG.133639.1	Chr16	0.369035	0.0727403	0.241595	0.134422	0.056509	539	195	252
1954	MSTRG.133735.18	Chr16	0	0.0907893	0	0.016495	0	361	93	105
1955	MSTRG.133803.2	Chr16	0	0	0	0.152662	0.016249	1393	402	684
1956	MSTRG.133846.1	Chr16	0.553102	0	0.130826	0	0	2041	1806	1887
1957	MSTRG.133846.3	Chr16	0.170513	0	0.034477	0	0	965	726	810
1958	MSTRG.133846.4	Chr16	0.0525113	0	0	0	0	862	636	708
1959	MSTRG.133846.5	Chr16	0.53533	0	0.0307217	0	0	1555	1386	1398
1960	MSTRG.133942.73	Chr16	0.0432143	0.0222393	0.0838793	0.00240533	0.001327	2213	1605	1758
1961	MSTRG.133942.76	Chr16	0.078433	0.115726	0.0572583	0.607291	0.089401	2667	1158	1353
1962	MSTRG.133942.80	Chr16	0.108147	0.092854	0.0872503	0	0.0810083	1682	1074	1227
1963	MSTRG.133942.81	Chr16	0.178241	0.20002	0.164394	0.399496	0.0998677	1633	1137	1269
1964	MSTRG.133953.1	Chr16	2.76411	3.04669	1.35132	3.28245	1.64488	277	114	123
1965	MSTRG.133953.2	Chr16	3.24903	2.17728	5.00496	3.15894	1.22506	239	0	0
1966	MSTRG.134000.2	Chr16	0.40845	0.287874	0.234507	0.331125	0.033172	1176	84	165
1967	MSTRG.134038.1	Chr16	1.03163	4.01353	1.86175	2.26507	3.47411	2301	213	558
1968	MSTRG.13404.2	Chr01	0.431151	0.083447	0.585787	0.0809403	0.0165317	1426	354	357
1969	MSTRG.134113.1	Chr16	0.0445373	0	0.0932037	0	0	421	0	36
1970	MSTRG.134117.2	Chr16	0	0	0	0.0485513	0	265	0	99
1971	MSTRG.13413.10	Chr01	0.00173233	0	0.529536	0	0.00463467	419	36	51
1972	MSTRG.13413.9	Chr01	1.39414	3.62675	0.942423	0.576839	0.0286773	634	402	444
1973	MSTRG.134134.1	Chr16	0.0963467	0	0	0	0	291	36	138
1974	MSTRG.134134.2	Chr16	0.0910127	0	0	0	0	227	48	72
1975	MSTRG.134134.3	Chr16	0.180285	0	0.255791	0	0	687	447	531
1976	MSTRG.134154.1	Chr16	0.113616	0	0	0.253115	0	227	0	0
1977	MSTRG.13420.4	Chr01	0	0.0125383	0.442103	0.315633	7.33333e-06	4583	4047	4131
1978	MSTRG.13420.5	Chr01	0.06199	0.692387	0.072972	0.0370783	0.0369877	1914	1371	1416
1979	MSTRG.134233.1	Chr16	0.136312	0.0535963	0.0498167	0.006283	0.2981	625	72	198
1980	MSTRG.134234.1	Chr16	0.032439	0.025591	0.461939	0	0.059431	575	327	384
1981	MSTRG.134237.1	Chr16	0.0674763	0	0	0	0	286	39	81
1982	MSTRG.134250.2	Chr16	0.0545933	0	0	0.11674	0	210	24	57
1983	MSTRG.134251.1	Chr16	0.025434	0.13019	0.00337467	0.125996	0.00269667	278	0	117
1984	MSTRG.134256.3	Chr16	0.281276	0.491394	0.0994447	1.09575	0.225901	2512	2292	2328
1985	MSTRG.134258.1	Chr16	0.161785	0.172925	0.136987	0.164111	0.052456	626	0	108
1986	MSTRG.134289.1	Chr16	0.0761663	0	0	0	0	243	0	0
1987	MSTRG.134321.1	Chr16	0	0	0.0733897	0	0	808	312	444
1988	MSTRG.134321.2	Chr16	0	0	0	0.0189777	0.078497	877	405	537
1989	MSTRG.134321.3	Chr16	0	0.141745	0	0	0	963	513	645
1990	MSTRG.134325.2	Chr16	0	0	0.109041	0	0	755	444	531
1991	MSTRG.134359.1	Chr16	0.0892137	0.112601	0.0961767	0.0956387	0.12533	229	21	24
1992	MSTRG.134379.1	Chr16	0.00559333	0.001519	0.0108897	0.395331	0	4039	216	282
1993	MSTRG.134379.2	Chr16	0.000503333	0	0.024687	0.118166	0	3777	1701	1761
1994	MSTRG.134379.3	Chr16	0.000940667	0	0	0.11374	0	3703	1626	1686
1995	MSTRG.134379.4	Chr16	0.00215167	0	0	0.205599	0	2581	816	912
1996	MSTRG.134391.1	Chr16	0.120678	0.0195177	0.0130623	0.0395147	0.442408	720	402	411
1997	MSTRG.134392.1	Chr16	0.0625897	0.0744753	0.01734	0	0.091883	320	0	0
1998	MSTRG.134419.1	Chr16	0.216844	0.151619	0.0848983	0.0506	0	319	12	156
[truncated: 7,442 more rows]
