# Supplementary material for: Expression Profiles and Characteristics of Apple lncRNAs in Roots, Phloem, Leaves, Flowers, and Fruit
Source: Int J Mol Sci. 2022 May 25;23(11):5931. doi: 10.3390/ijms23115931 (PMC9180697; doi:10.3390/ijms23115931)
Supplement: Supplementary file 1 [file ijms-23-05931-s001.zip › Table S5.xlsx]

## Sheet: All_gene_fpkm
Table S5 Expression of mRNAs in different tissues (FPKM)
No.	LncRNA_ID	Flowers	Phloem	Leaves	Roots	Fruits
1	MD00G1000100	0.188956	0.0710687	0	0.0248627	0.133842
2	MD00G1000200	1.17714	0.874161	0.864308	0.766123	0.894602
3	MD00G1000300	0.00392267	0.007491	0.0464583	0.182531	0
4	MD00G1000500	2.94694	0.315077	0.336134	0.795488	0.731256
5	MD00G1000600	6.57772	1.25466	34.1582	0.0876527	1.4219
6	MD00G1000700	1.36926	4.81492	0.635128	4.73978	0.449944
7	MD00G1000800	45.3528	30.866	15.4205	39.6844	62.5675
8	MD00G1000900	3.0367	3.80353	2.73321	3.35737	1.12927
9	MD00G1001000	1.78512	2.49113	2.9273	2.97411	1.42937
10	MD00G1001200	0.199481	0.203341	0.133688	0.281812	0.036004
11	MD00G1001300	0	0	0	0.0174517	0
12	MD00G1001400	31.6757	26.0408	15.2657	23.7668	73.4933
13	MD00G1001500	25.6507	16.717	12.2936	6.83669	16.843
14	MD00G1001800	11.417	11.002	8.22266	11.5501	24.5074
15	MD00G1001900	3.02653	8.50705	2.48737	9.07813	1.05903
16	MD00G1002000	0.463554	2.04512	0.340571	1.78953	0.002881
17	MD00G1002100	147.392	166.351	136.809	91.5764	201.714
18	MD00G1002200	0.460768	0.634877	0.840458	0.0281787	0
19	MD00G1002500	1.57926	0.831019	1.81213	1.72468	1.13293
20	MD00G1002600	0.462734	0.144315	0.038298	1.05393	0.046184
21	MD00G1002700	0	0	0	0.525804	0
22	MD00G1003400	0.0232863	0	0.022657	0.00207967	0
23	MD00G1003500	1.73717	1.5802	0.896535	3.50944	0.444207
24	MD00G1003600	0.0814617	8.73184	2.8246	0.698355	0
25	MD00G1003800	12.7714	11.2541	10.724	9.49106	7.93904
26	MD00G1003900	0	0.942641	0.00331733	0.677497	0
27	MD00G1004000	0	1.4562	0.00793933	1.10476	0
28	MD00G1004100	21.8321	12.2134	8.6679	10.4654	17.8204
29	MD00G1004200	18.3032	11.2141	10.975	10.1611	11.5259
30	MD00G1004300	0.359332	16.9714	1.67818	3.60718	0
31	MD00G1004400	0.000942667	0	2.90386	0	0
32	MD00G1004500	0	0	0.195787	0	0
33	MD00G1004600	3.41267	0.292092	11.1824	0	0.040435
34	MD00G1004900	53.6915	4.01787	4.55865	3.02694	6.20477
35	MD00G1005000	0.208395	0.0204317	0.144166	0.00138467	0.00226333
36	MD00G1005200	0.00736367	0.0221063	0	0	0
37	MD00G1005300	3.06745	0.11129	2.18299	34.6116	23.5694
38	MD00G1005400	0	0.0125463	0	0.0229307	0
39	MD00G1005500	0.381596	0.382905	0.322418	0.695485	0.199629
40	MD00G1005600	15.3648	7.60587	7.50568	4.8807	0.286485
41	MD00G1005700	323.343	34.3702	74.4646	233.446	336.946
42	MD00G1005800	0	0	0.351066	0.0857333	0.0649903
43	MD00G1006000	1.25923	0.528723	1.71949	0.451927	0.279557
44	MD00G1006100	0.44894	2.25517	0.015379	0.325043	30.8
45	MD00G1006200	0.365911	0.0586067	0.057297	0.361377	0.254081
46	MD00G1006400	0.432135	0	0.00626533	0	0.225961
47	MD00G1006500	0.653849	0.683204	26.3353	0.282148	0
48	MD00G1006600	0.219203	0.163477	18.4814	0.113647	0
49	MD00G1006700	5.37593	5.58209	6.85075	5.11382	4.48375
50	MD00G1006800	0.474981	1.10832	1.4365	0.28163	0.850366
51	MD00G1006900	6.13835	21.1934	5.04838	18.8063	4.42717
52	MD00G1007000	0	0.0114723	0.00134867	0.658996	0.283752
53	MD00G1007100	7.2566	7.29181	11.9918	5.13739	8.73614
54	MD00G1007200	1.76134	1.33163	5.59659	0.982997	0.359406
55	MD00G1007300	0.310369	0.0269593	0.278054	0.016226	0
56	MD00G1007400	0	0	0.012818	0	0
57	MD00G1007500	0.642893	3.78122	1.74013	1.45442	0.016923
58	MD00G1007600	9.84687	12.8403	9.4426	12.5866	16.2855
59	MD00G1007700	22.6011	17.7753	11.1941	51.7624	7.97843
60	MD00G1007800	5.1575	5.28951	3.6563	5.64218	2.93112
61	MD00G1007900	0.20656	0.13025	0.453712	0.108349	0.003778
62	MD00G1008000	0.539048	4.80021	1.1609	1.71459	0.014664
63	MD00G1008100	13.1568	10.4468	9.70846	18.0521	18.6292
64	MD00G1008200	0.988446	1.45566	1.35227	1.13097	0.100042
65	MD00G1008300	0	0	0.00720467	0.033234	0
66	MD00G1008400	1.62628	2.56918	1.27985	1.86067	1.34257
67	MD00G1008500	0	0	0.00513867	0	0
68	MD00G1008600	0.79007	1.22547	2.62538	0.940406	0.0150823
69	MD00G1008700	22.2648	6.424	11.7886	11.7967	9.0738
70	MD00G1008800	0	0.0409873	0.00714033	0	0
71	MD00G1009000	11.8646	7.32666	27.1929	7.89981	32.5135
72	MD00G1009200	0.0222707	0.313614	0.047177	0.722952	1.33108
73	MD00G1009300	8.95701	15.9188	28.6874	6.03806	13.0767
74	MD00G1009400	0.00928567	0.646822	0.107114	0.546092	0
75	MD00G1009500	8.53569	9.53012	6.62164	7.15758	12.3015
76	MD00G1009600	0.00620333	0.057761	0.0357137	0.0265153	0.002698
77	MD00G1009700	3.33735	3.40474	3.22285	3.76197	1.70222
78	MD00G1009800	32.8924	5.28904	12.4387	29.3005	4.75397
79	MD00G1009900	2.79158	4.46899	2.87	7.05629	2.48991
80	MD00G1010000	14.6299	11.161	10.134	8.37624	15.1299
81	MD00G1010100	0.0204907	0	0	0	0
82	MD00G1010200	0.909232	0.319829	0.669484	0.0542093	0
83	MD00G1010300	0	0	0.00882833	0	0
84	MD00G1010500	0	0	0.147376	0	0
85	MD00G1010600	0.300437	0.459327	0.730017	0.52031	0.293662
86	MD00G1010700	1.74531	1.60785	2.71114	1.95815	1.93085
87	MD00G1011000	0	0.008189	0	0.0287927	0
88	MD00G1011100	0.0110087	0.003882	0.0148923	0.013733	0.004925
89	MD00G1011400	0.224374	0.419766	0.150194	0.207419	0.271949
90	MD00G1011500	1.06178	2.88239	0.731444	2.18533	0.1627
91	MD00G1011600	2.16419	1.79158	0.7207	2.54192	1.80725
92	MD00G1011700	3.11776	2.42877	2.36394	3.51776	1.83687
93	MD00G1011900	0.193032	2.13921	0.951385	1.18932	0.06855
94	MD00G1012000	0	0.17689	0.00325633	0.0290103	0
95	MD00G1012100	0.0293027	0.301253	0.207544	0.223356	0.188454
96	MD00G1012200	3.17564	4.10242	1.67273	4.06095	1.86125
97	MD00G1012300	11.9748	8.35857	15.4766	19.3119	4.25817
98	MD00G1012400	0.63585	0.680035	1.28539	0.646474	0.103729
99	MD00G1012600	2.15543	0.556407	0.900376	0.7266	0.505672
100	MD00G1012700	0.173343	0.002105	0.0983137	0.00336467	0
101	MD00G1012800	0.0163977	0.0105357	0.00152133	0.947594	0.012275
102	MD00G1012900	0.219134	0.008098	0.632136	0.281273	0.00112233
103	MD00G1013000	0.133121	0.211434	0.0365633	7.6624	0.382171
104	MD00G1013300	2.26423	1.81851	0.208739	1.53612	0.605679
105	MD00G1013500	3.41873	3.26944	3.15901	3.34759	4.06835
106	MD00G1013600	4.77029	215.383	15.4353	131.18	0.0203087
107	MD00G1013700	1.08919	0.898135	0.436077	0.988342	1.94685
108	MD00G1013800	2.9086	0.65799	2.55498	6.57254	0.185955
109	MD00G1013900	0.162779	0.254531	0.11991	0.143721	0.114287
110	MD00G1014000	9.52674	15.4564	6.30931	15.8108	5.69867
111	MD00G1014100	0.00442967	0.005536	0	0.018761	0
112	MD00G1014300	3.20838	6.98646	10.7171	5.09518	0
113	MD00G1014800	0	0	0.012047	0.835098	0
114	MD00G1014900	0.445843	0.774643	0.762123	0.192672	0.0126057
115	MD00G1015100	0.00383033	0	0.00343333	0.0161947	0
116	MD00G1015500	0.410931	0.9344	0.814854	0.821562	0.0307517
117	MD00G1015600	0.210905	1.00226	0.870512	0.462665	0.466552
118	MD00G1015700	1.43238	2.28393	2.85791	2.16952	1.03636
119	MD00G1015800	5.11861	5.43459	2.45044	10.9827	0.496402
120	MD00G1016200	0	0.00509	0	0.196002	0
121	MD00G1016400	1.38817	5.20437	2.09248	7.85306	1.61953
122	MD00G1016500	0	0.437224	0.004791	0.0421503	0
123	MD00G1016700	16.3002	15.5525	13.7633	17.5131	11.1675
124	MD00G1016800	52.0062	34.226	31.2467	24.4585	23.1227
125	MD00G1016900	0.119073	0	0	0.000377333	0
126	MD00G1017000	0	0.412625	0	0.957595	1.54629
127	MD00G1017100	10.2825	15.5922	12.4886	15.5207	7.91261
128	MD00G1017200	3.6469	9.42698	9.78282	3.62822	0
129	MD00G1017300	96.7089	60.4302	95.9051	46.8792	160.107
130	MD00G1017400	4.10152	6.22374	5.39321	5.78435	2.14237
131	MD00G1017500	0.012854	0.236179	0.0172217	0.519339	0.007805
132	MD00G1017600	0	0	0	0.135595	0
133	MD00G1017700	0.894059	1.18993	1.31582	1.35402	0.780824
134	MD00G1017800	0.798684	0	0.064565	0.00747067	0
135	MD00G1018100	2.12656	2.25919	1.57153	3.12033	1.48911
136	MD00G1018200	0	0.131027	0	0.00565533	0
137	MD00G1018300	0	0	0	0.004375	0
138	MD00G1018400	3.24916	57.4427	4.53641	12.2281	0.161116
139	MD00G1018600	66.2279	38.3443	28.8182	40.7807	66.7699
140	MD00G1018700	23.824	1.02119	1.78241	91.8033	11.1863
141	MD00G1018800	0.036914	0.01884	0.0313177	2.06408	0
142	MD00G1018900	104.467	178.606	96.4136	156.536	89.8049
143	MD00G1019100	6.57597	4.59598	7.44531	4.43959	9.90231
144	MD00G1019200	13.9866	16.4513	38.0645	9.91954	13.2415
145	MD00G1019700	19.9602	18.1175	20.2413	13.9073	12.7759
146	MD00G1020000	0.00562067	0.00852367	0.0184517	0.0125977	6.66667e-07
147	MD00G1020200	4.26899	7.54833	4.69272	7.45037	0.975517
148	MD00G1020300	1.64034	2.02079	1.51854	3.41774	0.797558
149	MD00G1020400	1.23932	1.83154	1.00175	2.00583	1.4549
150	MD00G1020500	0.425164	0.452668	0.355376	0.535042	0.405263
151	MD00G1020600	4.63824	4.99898	3.77035	5.12216	3.03908
152	MD00G1021100	2.932	2.88154	1.87588	5.35624	0.353113
153	MD00G1021300	0.049278	0.0990757	0.088548	0.132739	0.0454003
154	MD00G1021400	0	0.0165947	0	0	0
155	MD00G1021500	4.77646	4.00147	2.814	6.03474	0.634961
156	MD00G1021600	0.4738	0.251493	0.109692	0.404411	0.062005
157	MD00G1021700	0.699828	0.955155	0.356408	1.27761	0.143051
158	MD00G1021800	6.97627	6.51633	4.02498	8.17312	0.685383
159	MD00G1021900	0.94401	0.384043	0.633272	0.028448	0.13674
160	MD00G1022000	0.0986263	0.197796	0.155354	0.0141277	0
161	MD00G1022100	0.21476	1.89042	0.251809	0.0457613	0.0659153
162	MD00G1022200	8.21865	5.3707	20.13	0.0182933	1.79178
163	MD00G1022400	45.7666	0.309835	7.01414	0.0585883	0.138759
164	MD00G1022500	0	0	0.00863267	0	0
165	MD00G1022600	0	0	0.00277533	0	0
166	MD00G1022900	14.3456	23.8014	16.0414	26.3999	13.8121
167	MD00G1023000	7.97607	8.94866	6.65802	11.6965	0.450597
168	MD00G1023100	0.00907767	0	0.1278	0	0
169	MD00G1023300	0.785056	1.33657	0.689152	1.83307	0.397607
170	MD00G1023400	0.0801347	0.099606	0.0913967	0.0544313	0.0745597
171	MD00G1023600	0.390914	1.09206	0.475862	0.63856	0.388583
172	MD00G1023700	3.05024	2.26987	2.84036	2.40606	1.79196
173	MD00G1023800	0.0225473	0	0.0222797	0	0
174	MD00G1024000	0.13953	0.107547	0.285744	0.187086	0.13129
175	MD00G1024100	0.002574	0.0132657	0.0157493	0.00651967	0.00446733
176	MD00G1024300	1.32718	1.20892	1.78072	1.84812	0.876306
177	MD00G1024500	1.99228	1.95441	1.56426	0.976005	1.55209
178	MD00G1024600	0.000202	0.00148633	0.00164567	0.00127967	0
179	MD00G1024700	0.613895	0.714056	0.10707	1.48787	0.00810533
180	MD00G1024800	1.05885	0.00979433	1.09485	0.0108297	0.0244573
181	MD00G1024900	1.9208	1.99573	1.8522	2.30083	1.33281
182	MD00G1025200	51.005	17.6731	34.0077	14.0362	15.36
183	MD00G1025500	11.5953	10.2344	7.46763	8.14481	5.36189
184	MD00G1025600	21.6479	15.9402	11.8933	13.0871	24.1293
185	MD00G1025700	7.5979	4.56431	10.009	4.50666	4.73424
186	MD00G1025800	5.34138	1.76001	5.69537	0.331127	1.2545
187	MD00G1025900	1.05755	0.201723	7.56764	0	0.00981667
188	MD00G1026000	0	0	0	0.0620923	0
189	MD00G1026100	1.4946	1.53403	1.78529	2.27201	0.55267
190	MD00G1026200	1.47404	0.859265	1.64712	1.46267	1.02442
191	MD00G1026300	0.030278	0.0131427	0.00649733	0.004967	0.0182883
192	MD00G1026400	0.00263567	0	0.002768	0	0
193	MD00G1026500	0.327824	0.011205	0.238935	0.0108927	0.056416
194	MD00G1026600	0	0	0.011437	0.0215823	0.00841367
195	MD00G1026700	2.29033	0.624545	1.07509	0.176884	0.674784
196	MD00G1026800	0.145104	0	0.265317	0	0
197	MD00G1026900	0.440939	0	0.966523	0	0
198	MD00G1027000	1.22609	0.0682833	1.53679	0.0312673	0.268415
199	MD00G1027200	0.971015	0.0102863	0.977753	0.002516	0.590431
200	MD00G1027300	0	0.00481767	0.0126223	0	0
201	MD00G1027600	10.5167	0.051191	8.31787	0.021326	3.04767
202	MD00G1027700	0.00674233	0	0.0189453	0	0.00206833
203	MD00G1027800	0.0686283	0.0154043	0.0277577	0	1.46667e-05
204	MD00G1027900	0.624984	0.644057	0.465545	0.762967	0.234621
205	MD00G1028000	3.60078	3.09974	3.34481	2.24395	1.28821
206	MD00G1028200	0.316273	0.001007	0.405983	0	0.226534
207	MD00G1028300	0.439127	0.116785	0.440955	0.00267833	0.098831
208	MD00G1028400	50.3785	48.4149	46.5314	48.5196	34.6387
209	MD00G1028500	1.14895	6.58307	0.911786	1.835	0.026072
210	MD00G1028700	14.9493	18.9065	15.8348	12.5307	11.1587
211	MD00G1028800	4.5022	6.57677	4.92814	7.8313	8.76855
212	MD00G1028900	0.903229	2.05856	3.83231	2.77901	0.519378
213	MD00G1029000	4.98857	0.009429	0.0128317	0	0
214	MD00G1029100	12.9255	16.4505	9.36926	17.3114	8.51822
215	MD00G1029200	0.092235	0.067967	0.0616553	0.123253	0
216	MD00G1029300	12.4069	12.3001	16.7939	7.07132	11.1508
217	MD00G1029400	0.188938	0.364984	0.30988	0.217564	0.0840637
218	MD00G1029500	15.5383	35.7506	26.7509	32.568	15.825
219	MD00G1030000	5.72734	6.20098	5.42332	5.65499	4.2787
220	MD00G1030300	0.00309867	0	0.035705	1.62803	0.00948367
221	MD00G1030400	1.0065	1.64029	1.66949	1.14512	0.783791
222	MD00G1030500	3.97753	2.32774	2.23726	4.12533	1.15815
223	MD00G1030600	5.1481	3.92509	2.72131	7.41182	10.4974
224	MD00G1031100	20.7404	23.8762	14.2663	21.8152	16.9572
225	MD00G1031200	7.12395	4.51889	6.7679	17.943	5.05617
226	MD00G1031300	17.6147	1.01266	8.88583	5.37503	11.4999
227	MD00G1031500	1.83631	1.88946	0.373998	0.780726	0.448608
228	MD00G1031600	26.0125	17.5203	15.8542	17.1512	16.5276
229	MD00G1031700	23.8684	23.9108	16.17	25.2558	15.606
230	MD00G1031900	6.16461	2.17929	5.75851	2.1857	4.4275
231	MD00G1032200	5.71103	5.23414	7.25804	6.03984	0.600648
232	MD00G1032300	10.4788	8.4801	6.18491	8.84996	19.5462
233	MD00G1032400	6.10936	0.455201	3.82171	2.45844	0.372979
234	MD00G1032500	6.23743	8.38021	8.58517	7.63068	9.76197
235	MD00G1032600	0.977411	0.448699	0.0167803	4.38852	0.0126473
236	MD00G1032700	8.75028	8.09248	8.01456	9.02798	8.89312
237	MD00G1033000	3.87242	3.11111	4.04045	3.87334	5.47345
238	MD00G1033100	3.57563	2.59907	4.08894	2.91001	5.06568
239	MD00G1033200	0.126591	12.6615	0.853729	18.6936	0.2297
240	MD00G1033400	4.3991	19.2706	8.1733	3.36198	0.0972053
241	MD00G1033500	1.20657	1.15467	1.58962	1.82048	1.03387
242	MD00G1033600	43.4794	22.5023	21.1277	23.2584	45.6412
243	MD00G1033700	30.302	0.0328123	2.94315	0	0.159441
244	MD00G1033800	0.129263	0	0.213185	0	0
245	MD00G1033900	0.390099	0.131319	0.377401	0.169609	0.133668
246	MD00G1034000	0.0783937	0	0	0	0
247	MD00G1034500	11.2806	5.88145	31.5134	9.32552	9.50311
248	MD00G1034600	1.84933	6.94285	2.97418	1.68926	0.00184433
249	MD00G1034800	6.23281	7.98709	5.43886	8.86439	3.75634
250	MD00G1035000	10.5979	6.5182	5.67595	0.948565	20.2273
251	MD00G1035200	0.0971203	0.0961127	0.055327	0.110926	0.0403647
252	MD00G1035300	0.0850297	0.0130047	0.076184	0.015123	0.0606717
253	MD00G1035400	10.4906	6.55824	7.68839	4.42064	6.26573
254	MD00G1035800	1.22476	35.0833	3.83986	7.48151	0.075058
255	MD00G1035900	24.6505	24.2067	24.0601	20.267	30.8365
256	MD00G1036000	0.299491	0.207603	0	0	0.0753343
257	MD00G1036100	10.4477	43.8476	1.99632	25.2007	16.494
258	MD00G1036200	0.154329	0.139161	0.420598	0.0730667	0.00183567
259	MD00G1036300	7.85381	2.88182	2.95149	33.7952	8.42632
260	MD00G1036600	6.17444	7.87439	51.0123	6.64	9.88781
261	MD00G1036800	343.669	0.736575	1.03282	0.873223	0.226993
262	MD00G1037000	17.926	11.9374	13.9141	7.59777	3.30609
263	MD00G1037100	34.0382	66.1345	190.063	29.9498	52.5589
264	MD00G1037200	2.12464	3.18092	2.67765	2.58074	2.02875
265	MD00G1037300	7.34087	8.18578	9.68967	5.61963	11.2075
266	MD00G1037400	0.0243493	0	0.02374	4.30727	0
267	MD00G1037500	0.0591777	0.00252467	0.181928	10.2892	0.0190703
268	MD00G1037600	0.00996933	0.002102	0	0.0163823	0.0192097
269	MD00G1037700	0	8.73333e-05	0	0	0.0162213
270	MD00G1038100	0	0	0	0	0.027008
271	MD00G1038200	0.0220643	0	0.081291	0	0.000195667
272	MD00G1038300	0.032448	0.0731867	0.00367667	2.13444	0.122416
273	MD00G1038400	5.23995	8.61773	4.85877	21.2051	4.55738
274	MD00G1038500	2.56864	4.80074	3.80191	5.00512	7.15073
275	MD00G1038700	0.213463	0.389596	0.37094	0	0
276	MD00G1038800	1.26629	1.80881	1.62358	6.51281	11.9849
277	MD00G1038900	17.5674	19.07	16.3893	21.6394	26.0949
278	MD00G1039200	38.1576	23.7135	2.66951	27.4248	10.2304
279	MD00G1039300	19.7364	3.04174	2.70872	6.95959	4.95547
280	MD00G1039400	0.0366423	0.0662587	0.024777	0.0454657	0
281	MD00G1039500	9.77944	11.2761	8.39609	12.2712	7.31741
282	MD00G1039600	4.99285	3.79344	3.01097	3.76343	1.0524
283	MD00G1039900	2.74405	5.13652	0.482637	9.35606	2.56626
284	MD00G1040000	59.4734	95.9256	478.928	2.20593	13.2374
285	MD00G1040100	5.24247	2.51086	5.31838	6.05745	5.06549
286	MD00G1040200	6.92625	10.2398	8.15413	11.8493	5.78906
287	MD00G1040300	0	0.012914	0.00746967	0	0
288	MD00G1040400	0	0	0.0043	0	0
289	MD00G1040500	4.53969	2.88391	2.04324	2.90386	1.7017
290	MD00G1040600	5.06022	3.07486	2.37872	2.9079	6.6811
291	MD00G1040900	32.1723	61.3819	29.3915	14.348	19.6548
292	MD00G1041000	0.071343	0.039007	0	0.11807	0
293	MD00G1041100	4.18602	1.73056	3.7677	1.55984	1.26102
294	MD00G1041200	3.78446	3.49716	2.63941	3.56328	4.12028
295	MD00G1041300	0.82598	0.071313	2.74834	0.509402	0.36276
296	MD00G1041800	1.00847	0	0	0	0
297	MD00G1041900	13.1993	15.0557	11.3933	12.9516	10.6092
298	MD00G1042000	0	0	0	0.246033	0
299	MD00G1043400	0.320376	0.0337727	1.2872	0.0133767	0.215113
300	MD00G1043500	0.187425	0.525621	1.15184	0.245594	0.084266
301	MD00G1043700	10.9115	7.71379	7.09034	7.25432	10.8231
302	MD00G1043800	0.693	4.51019	1.82087	0.921927	0.00648467
303	MD00G1044200	0.000465333	0.0197317	0.00111367	0	0.00177133
304	MD00G1044300	0.0542017	0	0	0	0.0524413
305	MD00G1044400	0	0	0	0	0.014819
306	MD00G1044500	7.4086	11.4299	29.9389	10.1585	10.4002
307	MD00G1044800	0.00812467	0	0	0	0
308	MD00G1045000	0.017862	0	0	0	0
309	MD00G1045100	1.24105	0.0314313	0.0106197	0.031595	0.0200963
310	MD00G1045200	4.66739	4.05057	3.99499	4.27052	3.78921
311	MD00G1045300	25.5922	18.8732	16.6494	24.7357	20.8836
312	MD00G1045400	0.00718333	1.0978	0.0717397	0.667314	0.106303
313	MD00G1045500	0	0.476487	0.00492667	0.08081	0.142031
314	MD00G1045600	0	0.0608973	0	0	0
315	MD00G1045700	0.017978	0.004389	0.005783	0.065282	0.117692
316	MD00G1045900	0.637107	0.497558	0.39861	0.67005	0.691016
317	MD00G1046300	3.92277	4.19176	4.24928	4.98983	3.76224
318	MD00G1046500	3.93214	2.71039	3.70587	3.27072	1.76884
319	MD00G1046700	0.3568	0.747072	0.566051	1.79556	0.476068
320	MD00G1046800	0.453029	0.0687877	0.230928	0.041683	0.108215
321	MD00G1047000	0.147243	0.181071	0.114657	0.392589	0.361426
322	MD00G1047100	0.993619	1.26393	1.4405	1.47149	0.917944
323	MD00G1047200	0.55079	0.797986	0.400288	0.613676	0.657124
324	MD00G1047300	0.0925383	0.154147	0	0.084321	0.391846
325	MD00G1047400	1.29767	26.0261	2.95383	9.19868	2.65419
326	MD00G1047500	0.089272	0.857684	0.261892	0.366874	0.189122
327	MD00G1047600	0.134521	0.318175	0.216795	0.031737	0.013841
328	MD00G1047900	4.14837	2.68042	5.40716	2.60686	3.03798
329	MD00G1048000	0	0	0.0241653	0	0
330	MD00G1048100	0.022002	0.00558167	0.038975	0.007991	0
331	MD00G1048200	1.50018	0.805212	1.89117	0.808523	1.59636
332	MD00G1048300	0.018134	0.12113	0.0209783	0.00995967	0.015728
333	MD00G1048400	2.10313	12.2497	2.14777	13.6388	5.64019
334	MD00G1048600	0	0.528776	0	0	0.00733233
335	MD00G1048700	0.0708643	0.423614	0.268943	0.877006	0
336	MD00G1048800	2.53727	5.24408	4.65984	5.22008	2.49411
337	MD00G1048900	5.6575	5.70213	5.81146	6.85452	8.72131
338	MD00G1049000	1.46608	2.02	2.10057	2.30313	1.41483
339	MD00G1049100	0.789672	23.6633	2.5374	7.72733	0.0323877
340	MD00G1049200	0.106731	0.121966	0.064365	0.0405627	4.65851
341	MD00G1049500	0	0.00816367	0	0	0
342	MD00G1049600	0.00742333	0	0	0	0
343	MD00G1049800	2.54069	0	0.504184	0	0
344	MD00G1050100	26.8935	17.1477	21.8375	20.1617	18.6865
345	MD00G1050200	0.676351	1.37165	2.12128	0.586702	0.0351873
346	MD00G1050300	0.867265	0.737599	1.55259	0.075759	0.0165307
347	MD00G1050400	0.902083	0.631378	1.8941	0.275367	0.009829
348	MD00G1050500	4.90033	4.15417	5.8224	3.86245	1.96301
349	MD00G1050600	5.48576	5.17546	10.6853	4.18076	9.03104
350	MD00G1050700	17.6345	22.0469	17.3473	28.3208	17.3825
351	MD00G1050800	0	0.267505	0.0146783	0.36503	0.0288497
352	MD00G1051000	0.00177133	0.070319	0.00507233	0.326672	0.154317
353	MD00G1051100	240.239	148.533	345.21	146.793	161.037
354	MD00G1051200	4.94948	6.26427	5.93318	5.23078	4.09204
355	MD00G1051300	24.7247	31.7581	12.9164	40.9731	43.356
356	MD00G1051400	10.6346	10.9855	7.90193	11.3712	11.4116
357	MD00G1051500	192.688	118.646	110.406	136.627	133.478
358	MD00G1051600	0.0198967	0	0	0	0
359	MD00G1051700	1.87598	0	0.0338623	0	0
360	MD00G1051800	18.5226	13.4114	10.8921	14.2473	16.601
361	MD00G1051900	0.040805	0	0.0523267	0	0
362	MD00G1052000	15.609	27.2522	55.3251	21.1786	59.102
363	MD00G1052100	3.25115	3.61971	2.73858	5.34831	4.29552
364	MD00G1052200	0.0159977	0	0	0	0
365	MD00G1052300	0.040117	0	0.00719733	0	0
366	MD00G1052400	0.27465	1.81019	0.152257	1.90552	0.023396
367	MD00G1052500	0.0405887	0.44186	0.0476737	0.207896	0
368	MD00G1052600	0	0.142958	0.043357	2.14225	0.059809
369	MD00G1052700	8.59983	13.1212	9.34504	13.4595	8.71634
370	MD00G1052900	0.378821	1.12319	0.482196	1.68832	0.234298
371	MD00G1053000	0.028959	0	0.290008	0	0
372	MD00G1053100	0.016135	0.0113763	0.186471	0	0
373	MD00G1053300	5.61766	8.54846	6.36474	8.43395	5.65982
374	MD00G1053500	0	0	0	0.011156	0
375	MD00G1053600	0.407452	0.565049	0.419821	1.82255	1.38481
376	MD00G1053700	8.53164	9.79277	10.214	19.8701	16.3235
377	MD00G1053800	3.12864	4.24621	3.00058	5.4743	2.74989
378	MD00G1053900	1.07958	2.79888	0.503654	2.10771	9.97936
379	MD00G1054000	0	0.032887	0.182075	0.0682953	0.00719867
380	MD00G1054100	1.8969	2.70894	1.7505	2.00917	2.10951
381	MD00G1054200	1.0433	0.352308	1.02324	0.378542	0.351659
382	MD00G1054300	0.0724127	0.130729	0.355035	0.112468	0.15319
383	MD00G1054400	0.047881	0.049365	0.24856	0.065492	0.040768
384	MD00G1054500	9.3023	9.70737	7.06769	3.32372	12.3214
385	MD00G1054600	2.86253	0.00255	0.007849	0.0198223	0
386	MD00G1055100	0.0322423	0.0121397	0.0267993	0.0550347	0.0122207
387	MD00G1055200	23.5225	9.7758	10.7742	7.91401	15.1574
388	MD00G1055300	34.3731	14.108	15.213	14.8032	22.7476
389	MD00G1055600	5.76666	5.41227	6.55554	5.23953	4.63338
390	MD00G1055800	8.59531	6.12357	5.78	7.67841	3.82744
391	MD00G1056000	0.211052	2.79781	1.70051	0.511877	0
392	MD00G1056100	3.74326	2.84514	11.6437	3.89659	4.18642
393	MD00G1056300	0.628688	0.208932	0.631901	0.379573	0
394	MD00G1056400	1.28126	5.4101	6.67008	0.375606	0.10986
395	MD00G1056500	3.06644	0.977784	1.86657	1.15161	3.68731
396	MD00G1056700	2.40778	1.66229	3.46072	1.23985	1.73796
397	MD00G1056800	2.09654	0.851764	2.68305	0.816525	0.021678
398	MD00G1056900	0.205175	4.45181	0.508531	1.8467	0.0673507
399	MD00G1057000	0.628366	7.54416	0.176751	6.31991	0
400	MD00G1057100	1.13305	2.36072	1.39395	1.93291	0.718892
401	MD00G1057200	0.0190577	0.834954	0.080351	0.07345	0.00781033
402	MD00G1057300	1.57188	0.815622	0.153994	0.855185	5.51171
403	MD00G1057400	5.91273	3.52766	5.77802	3.5911	5.78488
404	MD00G1057500	3.5491	0.19399	0.45875	0.789628	2.36854
405	MD00G1057700	13.3833	15.2238	56.697	0	1.82506
406	MD00G1057800	1.92871	2.22662	2.97341	1.95594	0.650043
407	MD00G1057900	3.76965	5.98586	4.83451	8.0473	2.96169
408	MD00G1058000	0.965547	1.99837	2.08684	0.933325	0.021515
409	MD00G1058100	2.93638	6.17838	6.15443	2.18625	0
410	MD00G1058300	1.22496	1.91308	5.16164	14.371	0.0101347
411	MD00G1058400	0	0	0.341902	0	0
412	MD00G1058500	8.58032	9.06169	6.57703	10.3829	11.7598
413	MD00G1058600	40.5372	23.5211	25.1069	17.1176	36.277
414	MD00G1058700	7.63927	3.89549	2.41999	3.75212	1.90456
415	MD00G1058800	0.216924	0.00779267	0.028021	0.0672657	0
416	MD00G1058900	9.28537	7.32988	4.74427	6.09263	5.3072
417	MD00G1059000	1.64333	1.79366	2.66949	2.22472	2.52068
418	MD00G1059100	6.70348	7.43061	6.79937	10.2288	7.05831
419	MD00G1059200	21.3842	20.4764	14.9129	16.3925	20.711
420	MD00G1059300	0.007109	0.0883217	0.0490643	0.0637403	0.113597
421	MD00G1059400	0.00643967	0.036557	0.0668893	0.0437983	0.0707013
422	MD00G1059700	0.301054	0.276998	0.376924	1.07824	3.14882
423	MD00G1059900	16.0077	0.0515247	0.0351273	0.024737	0
424	MD00G1060000	0.380765	0.478704	0.303773	0.610063	0.389307
425	MD00G1060100	29.1586	25.1169	27.0632	28.5626	22.6312
426	MD00G1060200	0.909468	2.89091	2.06381	1.21191	0
427	MD00G1060300	22.1749	19.8072	17.1627	19.5505	29.6306
428	MD00G1060400	1.50963	10.1927	1.52127	4.83015	0.315863
429	MD00G1060500	0.150658	0.084877	0.0195833	0	0.121248
430	MD00G1060600	0.729693	0.0371543	0.00117933	0.028913	0.153571
431	MD00G1060700	5.56071	11.3516	8.00759	7.68775	2.81093
432	MD00G1060800	3.35582	12.0508	4.55832	6.79134	0.00853733
433	MD00G1060900	9.56055	11.4423	9.97671	12.5723	10.9748
434	MD00G1061000	0.00710333	0	0.105273	0	0
435	MD00G1061100	6.57118	2.46545	12.0547	5.0645	0.0175797
436	MD00G1061200	0.054102	0.0115733	0.0325803	0.02297	0
437	MD00G1061600	4.97411	3.56904	2.38435	4.48437	4.60971
438	MD00G1061700	18.283	8.69938	11.509	15.1371	10.1724
439	MD00G1061800	30.5395	40.6939	105.309	42.4742	35.388
440	MD00G1062000	0	0	0	0	0.014467
441	MD00G1062100	2.60203	1.59321	2.86838	1.69041	1.70835
442	MD00G1062200	26.1672	30.3469	24.501	27.109	23.5893
443	MD00G1062300	7.39607	0.398188	5.54631	0.202896	2.64951
444	MD00G1062400	0.189384	0	0	0	0
445	MD00G1062600	0	0	0.00206	0	0
446	MD00G1062700	0.147979	0.732752	0.123668	0.925477	0.0533347
447	MD00G1062800	0.0447323	0.030319	0.340385	0.0162247	0
448	MD00G1062900	3.6518	2.26139	2.44162	2.05771	15.8057
449	MD00G1063000	0.0519513	0.725727	0.0586123	0.00503833	0
450	MD00G1063200	0	0.0216133	0	0.0787843	0.0142173
451	MD00G1063300	2.40023	0.154806	0.0138747	0.124259	0.00748833
452	MD00G1063400	35.1167	16.433	15.4976	16.9156	25.2774
453	MD00G1063500	2.72185	0.60842	1.04087	0.830596	0.598889
454	MD00G1063600	0.214493	3.1066	0.0864003	634.854	0.0143673
455	MD00G1063700	0.065676	0.0625417	0.094772	0.0678507	0
456	MD00G1063900	4.46245	5.23913	3.80697	6.47235	5.17706
457	MD00G1064000	5.02159	11.3681	9.91339	6.24846	1.67232
458	MD00G1064100	2.91808	3.55274	3.33575	3.63478	3.49509
459	MD00G1064200	0	0.015078	0.0143943	3.33333e-06	0
460	MD00G1064300	0	0.00298467	0	0	0
461	MD00G1064400	36.3724	24.4596	26.774	27.2787	37.2707
462	MD00G1064600	0.316722	2.82352	0.07213	0.480736	0
463	MD00G1064700	10.443	10.415	19.4736	9.57944	27.6724
464	MD00G1064800	7.63278	7.8691	15.6488	6.49429	10.1095
465	MD00G1065000	0.0309397	0.261817	0	1.55223	0.00190833
466	MD00G1065100	0.028294	1.13689	0.0211117	0.201151	0.00669
467	MD00G1065200	0.006514	0.334703	0	0.406674	0
468	MD00G1065300	8.64654	44.7043	7.77933	27.7154	21.1906
469	MD00G1065500	0.00680467	0	0.135047	0.0632323	0
470	MD00G1065700	0	0.224641	0	0	0
471	MD00G1066000	0.037547	0.0179437	0.031419	0.0146567	0.0913733
472	MD00G1066100	0.00569967	0	0	0.018813	0.525497
473	MD00G1066200	0.045382	0.04107	0.037589	0.0456397	0.0307187
474	MD00G1066300	1.23447	1.08988	1.17843	0.944223	1.47731
475	MD00G1066600	4.57685	8.56457	4.59269	9.67738	5.12022
476	MD00G1066700	25.5139	11.8968	21.8381	13.8606	20.0692
477	MD00G1066800	2.31225	4.56989	8.67215	3.81017	3.9624
478	MD00G1067100	0	0	0	0	0.0108243
479	MD00G1067300	6.06944	9.24314	7.29036	7.18234	9.23324
480	MD00G1067400	10.973	0.54753	0.137262	1.1437	0
481	MD00G1067500	7.25555	7.59113	8.34428	4.42233	5.13753
482	MD00G1067700	0	0.010921	0	0	0
483	MD00G1067800	0.0247947	0.0538737	1.9191	0.029152	0
484	MD00G1067900	1.37525	2.40628	1.66171	2.32168	0.89892
485	MD00G1068000	0.450909	0.21451	0.300324	0.153015	0.368853
486	MD00G1068100	1.88467	0.020926	0.0667087	0	0
487	MD00G1068300	3.68133	4.78968	3.68242	8.92372	6.96781
488	MD00G1068500	16.1095	13.467	186.24	0.0898137	3.56174
489	MD00G1068600	14.2301	34.5426	28.8917	28.418	25.5928
490	MD00G1068700	13.0031	16.8028	12.8164	20.5728	9.61169
491	MD00G1068800	0.58915	0.39597	0.477692	0.602409	0.0524873
492	MD00G1069500	23.9045	0.064846	0.042387	0	0
493	MD00G1069800	17.9052	15.2052	15.8646	17.9526	33.5539
494	MD00G1069900	3.34218	0.0356377	2.66958	0	4.15542
495	MD00G1070000	26.7544	2.82351	7.53812	3.8545	24.2074
496	MD00G1070100	6.647	0.283752	2.16537	1.53039	1.50699
497	MD00G1070400	19.6057	15.2266	11.5862	12.5209	16.262
498	MD00G1070500	0.159306	0	0	0.396578	0
499	MD00G1070600	6.21088	5.19476	3.70423	2.69113	2.54383
500	MD00G1070700	4.71461	5.45337	6.80544	4.65298	2.98481
501	MD00G1070800	0.302134	0.282642	0.390199	0.16987	0.00157633
502	MD00G1071000	54.9552	46.5895	43.452	48.9192	145.027
503	MD00G1071100	24.1045	16.9369	19.1335	20.3812	43.1463
504	MD00G1071200	19.5588	18.3224	12.5676	20.9235	25.7536
505	MD00G1071300	8.81663	6.92333	6.56011	7.16642	5.90562
506	MD00G1071700	0.248643	0.121271	0.0891573	0.153052	0.0722327
507	MD00G1071800	3.90559	2.4204	3.96903	1.72721	0.851346
508	MD00G1071900	3.43663	3.75318	1.94116	1.94346	2.54305
509	MD00G1072100	3.77156	0.726876	5.16865	0.239551	0.0207863
510	MD00G1072200	0.966272	1.42575	1.04242	1.78096	1.36094
511	MD00G1072300	27.3463	19.1729	16.4338	21.8106	20.1102
512	MD00G1072500	46.9107	23.2827	16.3335	13.5091	1.20766
513	MD00G1072600	0.866367	0.962377	0.31876	0.200359	0.636901
514	MD00G1072700	1.69932	1.90472	1.9734	1.77252	1.30863
515	MD00G1072800	0.934426	0.99057	0.88258	0.866	0.563769
516	MD00G1072900	0	0.011022	0.0197133	0	0
517	MD00G1073000	0	0.048086	0.223142	0	0.019411
518	MD00G1073200	47.9653	9.56556	139.206	0.0575903	1.68531
519	MD00G1073300	0.389318	1.88832	0.68842	1.87857	0.444884
520	MD00G1073400	10.9745	23.615	7.00192	56.9947	53.4015
521	MD00G1073900	2.33825	3.23561	0.452407	1.03448	0.36159
522	MD00G1074000	19.7001	15.0246	13.7644	10.567	29.0687
523	MD00G1074100	27.2768	32.0849	18.7472	31.623	42.2556
524	MD00G1074700	0	0	0.00414433	0	0
525	MD00G1075000	27.1647	0.089788	1.36611	0	0
526	MD00G1075100	3.59448	2.08201	3.6808	1.32614	0.762869
527	MD00G1075200	1.8957	0.018233	0.022414	0.113102	0
528	MD00G1075300	4.16018	4.54536	6.36552	9.5891	7.88042
529	MD00G1075400	2.07515	2.7733	1.30663	4.83567	1.16259
530	MD00G1075500	45.2946	17.9053	17.0734	33.8215	57.2331
531	MD00G1075600	0	0	0.0116727	2.66982	0
532	MD00G1075700	77.5715	36.3343	49.6607	32.1361	39.3848
533	MD00G1075800	10.3623	6.3981	9.16695	4.84409	8.92111
534	MD00G1076000	0.671287	0.289949	0.78959	0.534046	0.326453
535	MD00G1076100	0.411671	24.7236	0.566844	60.4991	0.296094
536	MD00G1076200	0.293262	0.227201	0.233113	0.212851	0.183919
537	MD00G1076300	123.015	77.8503	183.259	47.1785	106.135
538	MD00G1076400	57.3356	41.2535	33.8829	40.7957	28.7115
539	MD00G1076500	0	0.100522	0	0	0.0120127
540	MD00G1076700	5.44258	9.5071	3.97735	3.94566	1.21842
541	MD00G1076800	22.7369	91.1948	23.2317	52.8229	11.9921
542	MD00G1076900	0.872296	1.69805	1.32277	1.51071	1.24522
543	MD00G1077000	1.64143	10.8749	8.59599	3.95522	2.82267
544	MD00G1077100	0.415765	0.514031	0.783602	0.391482	0.403096
545	MD00G1077300	0.152912	0.0633723	0.0244223	0.215879	0.00534867
546	MD00G1077400	0.197779	0.0661513	8.94926	0	0.00282433
547	MD00G1077700	0	0	0.0127693	0	0
548	MD00G1077800	0	0	0	0	0.000160333
549	MD00G1077900	3.19583	2.99643	2.23535	2.45169	3.5404
550	MD00G1078000	0.518416	0.267366	0.584187	0.345255	0.408053
551	MD00G1078100	11.6851	15.6752	6.81001	11.8479	15.4598
552	MD00G1078200	0.310112	0.062402	4.71492	0.0282603	0
553	MD00G1078300	6.10891	7.403	5.45799	6.69924	4.0998
554	MD00G1078400	9.71184	10.4564	7.22033	8.73458	36.6783
555	MD00G1078500	9.09966	11.5696	11.7643	9.48664	8.63702
556	MD00G1078600	27.7988	30.1223	26.1147	48.2578	31.8187
557	MD00G1078900	4.69736	6.40942	3.83931	5.46534	4.48173
558	MD00G1079100	1.6e-05	5.1e-05	8.33333e-06	2.36667e-05	0.000166
559	MD00G1079200	6.2708	6.55369	4.81421	5.20823	4.56212
560	MD00G1079300	4.76667e-05	0.00752433	0.000197333	0.000111	0.0164003
561	MD00G1079400	0.0857287	0.471952	0.447861	0.403339	0.27733
562	MD00G1079500	0	0.120727	0.0805257	0.0649983	0.0775503
563	MD00G1079600	0.034277	0.262715	0.05769	0.068505	0.0360793
564	MD00G1079700	0.325621	0.209307	0.230408	0.00815767	0.0536427
565	MD00G1079900	5.3142	0.028161	5.16873	0.0391743	4.64007
566	MD00G1080000	0.105331	1.13989	0.0400617	1.02161	0.0361513
567	MD00G1080100	1.04427	0.501246	1.81526	0.309326	0.553029
568	MD00G1080200	0	0	0.00447867	0	0
569	MD00G1080300	0.0875953	0.214382	0.13044	0.147132	0.046367
570	MD00G1080400	5.37968	8.31989	3.67803	7.55304	4.2763
571	MD00G1080700	9.81749	8.58622	8.94072	9.56253	8.9611
572	MD00G1080800	72.7426	5.5929	80.0698	38.8846	27.7574
573	MD00G1080900	3.34574	2.95896	4.81949	1.50573	2.02682
574	MD00G1081000	0	0	0.01002	0	0
575	MD00G1081200	0	0.00250967	0	0	0
576	MD00G1081300	0.0222683	0.0570693	0.0325443	0.026235	0
577	MD00G1081400	0.0223457	0.0251167	0.0397667	0.0338133	0.039191
578	MD00G1081500	0.229498	0	0.00339967	0.156022	0
579	MD00G1081600	9.28906	10.9214	9.2286	20.7925	5.31096
580	MD00G1082000	4.87362	3.55052	0.769126	13.3678	9.76724
581	MD00G1082100	0.994849	6.39452	0.921744	7.36521	0.478758
582	MD00G1082200	0	0.0281877	0	0.0777903	0
583	MD00G1082300	0.300789	0.587066	1.48075	0.406633	0.268169
584	MD00G1082400	0.00468567	0.00325433	0.0174197	0.015807	0.014434
585	MD00G1082500	0.0111083	0.00866233	0	0	0.578967
586	MD00G1082700	0.366505	0.331111	0.413203	0.452772	0.399422
587	MD00G1082800	28.5186	31.7295	70.8516	45.5016	25.1394
588	MD00G1082900	0	0.00326367	0.0187633	0.101072	0.0656387
589	MD00G1083000	4.7314	6.93336	4.61998	5.10111	0.0979727
590	MD00G1083100	6.69017	12.6231	7.06687	21.0453	8.15943
591	MD00G1083300	0.021638	0.0583063	0	2.52836	0
592	MD00G1083400	0.0840683	0.176062	0.0223147	0.209998	0.0939697
593	MD00G1083500	0.0913047	5.53754	0.0621587	1.86397	0.45232
594	MD00G1083600	0.114692	3.89732	0.765479	1.46102	0
595	MD00G1083700	4.18666	7.33115	8.00715	5.71652	4.68621
596	MD00G1083800	0.990334	4.64858	5.89179	2.65446	0.23527
597	MD00G1083900	17.6827	12.499	13.6375	12.0133	22.0958
598	MD00G1084000	6.20906	7.59344	4.95319	11.3538	6.83865
599	MD00G1084200	0.00163267	0	0	0	0
600	MD00G1084300	1.11868	3.20153	2.26252	1.25077	0.0873363
601	MD00G1084400	0.576115	0.436841	0.438929	0.480142	0.678411
602	MD00G1084500	0.00729733	0	0.00654133	0	0
603	MD00G1084600	5.15768	8.42061	9.31535	2.7901	10.7455
604	MD00G1084700	0	0.00187767	0.000969333	0	0
605	MD00G1084800	0	0	0	0	0.0140513
606	MD00G1085000	0.911796	0.19728	0.434748	0.171918	0.443307
607	MD00G1085100	32.6353	3.42075	15.7818	4.90869	12.4974
608	MD00G1085200	2.85688	5.47852	14.5696	2.4895	2.35421
609	MD00G1085300	0.0540407	0	0	1.03747	0.0124707
610	MD00G1085400	0.02907	0.077224	0.0431713	0.168996	0
611	MD00G1085500	51.5587	65.148	30.305	75.1566	90.3428
612	MD00G1085600	1.10865	5.06923	2.75348	2.01953	0.33145
613	MD00G1085700	0.372737	0.19173	0.344945	0.327811	0.442067
614	MD00G1085800	0	0	0	0.0187183	0
615	MD00G1085900	7.07353	4.16114	7.80916	6.50989	14.1252
616	MD00G1086100	6.77101	16.0163	6.8413	6.51029	0.91173
617	MD00G1086200	64.5623	43.0124	36.6059	31.5668	79.2955
618	MD00G1086300	0	0.00387	0.016553	0	0
619	MD00G1086500	16.7063	14.5366	15.108	6.57856	9.08966
620	MD00G1086800	2.75982	12.0302	2.82141	14.2635	0.112708
621	MD00G1086900	1.08203	1.5791	2.73951	0.854214	0.252638
622	MD00G1087000	10.4674	11.637	4.31562	7.53988	29.6328
623	MD00G1087100	0.332824	1.14594	0.0587057	0.770686	0.821938
624	MD00G1087200	0.306657	0.01194	0.240572	0	0.0407453
625	MD00G1087300	8.03623	13.624	8.71675	18.3852	16.5606
626	MD00G1087400	4.24079	5.7715	3.3507	8.41754	7.45773
627	MD00G1087500	5.35246	2.7203	6.30312	2.56553	6.14301
628	MD00G1087600	4.99344	0.772831	0.12089	0.508402	0.309538
629	MD00G1087700	8.1595	8.13395	5.38779	8.42169	2.56296
630	MD00G1087900	0.0398567	0.249032	0.21501	1.59727	0
631	MD00G1088100	1.34044	4.5214	6.3007	4.14605	2.39815
632	MD00G1088300	0	0	0	0.006466	0
633	MD00G1088400	0	0	0	0.0718517	0
634	MD00G1088500	0.0191333	0	0.00749033	0.00645333	0
635	MD00G1088600	5.74424	4.91898	2.58147	4.81432	4.37241
636	MD00G1089100	18.4613	9.72726	109.706	0.127977	0.187231
637	MD00G1089200	5.60254	5.54344	4.78416	4.77871	2.09919
638	MD00G1089400	1.28613	1.08498	0.577246	0.200944	3.02859
639	MD00G1089500	1.78591	1.71148	1.66057	1.17324	0.869494
640	MD00G1089600	0.234137	45.6527	4.06033	34.1868	0.167041
641	MD00G1089700	30.7986	61.0852	24.1094	134.398	28.7948
642	MD00G1089800	0.348664	0.00920933	2.29461	0	0.0279733
643	MD00G1089900	0.0170997	0	0.00319033	0	0
644	MD00G1090000	8.90611	8.14855	6.16022	8.19122	9.53647
645	MD00G1090300	2.76209	0.725741	1.6674	1.08721	2.89232
646	MD00G1090500	0.422859	0.46102	0.556755	0.235277	0.223222
647	MD00G1090600	0.585652	0.353826	0.358256	0.348611	0.650028
648	MD00G1090900	29.4098	50.6785	4.85541	18.8339	10.2513
649	MD00G1091100	8.04282	5.73368	5.96793	5.80454	4.93067
650	MD00G1091200	16.5141	14.5068	12.734	11.0912	7.9836
651	MD00G1091500	0.909715	0.860405	0.642028	0.784608	0.341751
652	MD00G1091600	9.94883	11.0548	5.95627	11.2829	9.32549
653	MD00G1091800	4.5963	2.33916	5.60027	1.4606	2.40965
654	MD00G1091900	5.84678	0.009321	0.0383843	0	0
655	MD00G1092000	0	0.441172	0.246805	0.469272	0.445245
656	MD00G1092100	2.8018	3.01385	3.27769	3.66927	2.15868
657	MD00G1092300	1.25405	4.64916	0.624412	3.30745	0
658	MD00G1092400	0	0.0182637	0	0	0
659	MD00G1092500	29.7459	131.933	18.3794	34.1275	4.45771
660	MD00G1092600	5.9045	6.38946	1.92137	7.07375	37.0183
661	MD00G1092700	0	0	0	0.306517	0
662	MD00G1092800	1.34767	4.4493	3.67201	4.48159	0.717109
663	MD00G1092900	0.332063	0.0408513	0.258626	0.459956	0.31127
664	MD00G1093000	0.0944257	0.391619	0	0.0440423	0.069472
665	MD00G1093200	21.1478	5.06503	1.80713	4.20523	36.4569
666	MD00G1093300	3.07418	1.7599	3.9007	1.80975	5.14188
667	MD00G1093400	5.68946	19.2797	3.11479	11.9313	0.781263
668	MD00G1093500	0.360553	0.76757	0.0947997	0.683285	0.135443
669	MD00G1093600	11.8058	0.708691	13.231	0.252924	0
670	MD00G1093800	1.44934	4.62511	1.84864	3.319	0.253387
671	MD00G1093900	2.86894	0.0154743	0.015606	0.00771567	0
672	MD00G1094000	1.93366	0	0	0	0.326109
673	MD00G1094100	19.0159	6.78206	15.775	1.69124	1.40622
674	MD00G1094600	4.55423	4.35062	1.53912	5.85515	3.10444
675	MD00G1094800	0	0.0241693	0	0	0
676	MD00G1094900	5.08741	5.7278	4.94913	4.21962	6.53456
677	MD00G1095000	0.033726	0.00516967	0.003691	0	0
678	MD00G1095100	0.110409	0.138588	0.0664957	0.0529893	0
679	MD00G1095300	2.15471	3.4811	4.03625	2.31661	3.21789
680	MD00G1095400	0.411228	0	0.0397317	0.0918537	4.41457
681	MD00G1095500	0	0.0121717	0	0	0
682	MD00G1095600	1.87744	1.35553	0.430272	0.7094	6.93065
683	MD00G1095700	31.6174	31.9771	17.5672	44.4707	21.535
684	MD00G1095800	0.970044	0.554503	1.33969	0.670745	0.254784
685	MD00G1095900	0.151054	1.12858	0.00826267	2.78351	0.04701
686	MD00G1096000	10.3343	62.523	22.7248	32.3061	25.2823
687	MD00G1096200	0.97848	1.31512	1.39188	1.19742	0.64614
688	MD00G1096400	3.35362	0.0223483	0	0	0
689	MD00G1096600	8.46994	21.5272	4.54538	28.9914	8.20807
690	MD00G1096700	36.9958	0.879058	1.85053	4.25769	40.6026
691	MD00G1096800	0.0113213	0.0190483	0.050711	0.245755	0.093315
692	MD00G1096900	2.09427	5.87661	4.64168	3.6369	0.382849
693	MD00G1097000	3.25481	3.53504	3.56874	2.88077	3.13124
694	MD00G1097100	7.26292	7.62539	2.65747	4.6675	4.6561
695	MD00G1097200	0.211764	0.0122993	0	0.456504	0
696	MD00G1097300	18.8532	33.6922	16.0158	29.8271	55.3684
697	MD00G1097400	0	0.00571733	0.00811633	0	0.0137477
698	MD00G1097500	3.27234	1.69386	1.86129	1.14722	0.81791
699	MD00G1097600	0.010436	0	0.088633	0	0
700	MD00G1097700	1.54709	1.11704	1.55699	2.01307	2.25689
701	MD00G1098000	0.0220833	0	0	0.0319293	0
702	MD00G1098100	74.7269	0.169501	0.3082	0.0401083	0
703	MD00G1098200	0.830785	0.341643	0.181795	0.218901	1.02148
704	MD00G1098300	7.9697	12.4415	10.6547	2.88855	8.8056
705	MD00G1098400	20.8763	22.0706	12.2644	25.3708	42.8946
706	MD00G1098500	3.53498	3.10193	4.22295	3.95478	6.79579
707	MD00G1098700	11.1344	1.89189	36.2952	0.234608	0
708	MD00G1099100	13.4173	13.544	14.3835	11.2927	10.6985
709	MD00G1099300	0	0	0	0	0.00998267
710	MD00G1099400	1.9228	3.38	6.64604	0.024629	2.60611
711	MD00G1099600	7.77493	1.76536	1.14883	0.395119	2.44999
712	MD00G1099700	0	0	0.0301753	0	0
713	MD00G1099800	82.2177	95.1432	67.656	92.2493	82.4321
714	MD00G1099900	0	0.00537433	0.011212	0.0263157	0
715	MD00G1100000	4.47953	3.28161	5.30878	3.46637	3.67945
716	MD00G1100500	3.30156	1.81356	2.39596	2.68282	1.3602
717	MD00G1100600	5.47437	3.80494	6.32349	4.11866	7.41905
718	MD00G1100700	0	0.0166437	0	0	0
719	MD00G1100800	48.3227	0.107133	0.061624	0	0
720	MD00G1101100	0.451814	1.42153	0.812791	0.819238	0.257382
721	MD00G1101300	0.955021	0.347591	0.406095	0.428622	0.256224
722	MD00G1101400	0	0	0	0	0.128979
723	MD00G1101500	13.5573	0.032381	0.00990433	0.013098	0
724	MD00G1101700	0.153632	0.147629	0.129755	4.76056	0.189878
725	MD00G1101900	0.352644	0.057409	0.288829	1.4488	0.182819
726	MD00G1102000	0	0	0.0372157	0	0
727	MD00G1102100	0.0653063	0.706828	0.39745	0.49402	0.0909083
728	MD00G1102200	0.090634	0.072597	1.6707	0.291442	0.0613073
729	MD00G1102300	0.0156857	0	0	2.31374	0
730	MD00G1102500	2.31799	0.420947	1.42862	0.1889	0.795318
731	MD00G1102700	23.0838	140.111	47.4356	123.63	298.441
732	MD00G1102900	3.67097	4.97326	3.84362	4.50778	2.3843
733	MD00G1103100	6.53122	13.1923	52.0564	0.249254	1.2667
734	MD00G1103300	6.5813	4.38479	4.44365	2.68607	5.17479
735	MD00G1103600	0.475676	0	0	0	0
736	MD00G1103700	0.00372467	0	0	0.10705	0
737	MD00G1103800	10.6273	4.02216	12.0459	4.11881	8.7736
738	MD00G1103900	1.18582	3.54607	1.81023	2.2735	2.83041
739	MD00G1104000	73.3458	42.7259	32.2019	33.3887	148.286
740	MD00G1104100	11.6643	8.5211	6.31433	5.55251	11.211
741	MD00G1104200	29.1859	28.4646	18.2707	28.3511	9.15851
742	MD00G1104300	3.26387	5.08121	3.49008	4.07124	4.80995
743	MD00G1104400	0.199846	17.4595	0.558453	2.08391	0.0517643
744	MD00G1104600	1.19706	0.561288	0.3199	0.135611	0.99094
745	MD00G1104700	0.831663	0.274784	0.409963	2.0074	36.9907
746	MD00G1104800	9.42096	8.37885	10.2365	7.45323	10.5415
747	MD00G1104900	0.944398	0.165267	1.4599	0.350709	0.310785
748	MD00G1105000	354.316	121.158	16.9086	37.0575	1.2086
749	MD00G1105100	31.6951	0.0731113	0.085491	0.00780767	0.017413
750	MD00G1105200	4.42492	0.00926567	0.148218	0	0
751	MD00G1105300	95.5699	1.40524	22.9503	0.750263	0.274608
752	MD00G1105400	0.387329	0	0.019263	1.57561	0
753	MD00G1105600	20.6725	51.1907	36.7764	31.138	17.1282
754	MD00G1105700	53.656	0.48861	56.9726	0.00333733	0.0789403
755	MD00G1106100	21.3441	49.6876	57.0412	33.8045	13.5355
756	MD00G1106300	3.93564	0.888869	0.270552	0.0155607	0.0160933
757	MD00G1106400	10.6688	12.9624	9.1971	14.5838	17.6876
758	MD00G1106500	6.9779	10.6968	7.83324	11.7486	6.15725
759	MD00G1106600	20.4868	6.85581	3.3784	10.5608	50.0001
760	MD00G1106700	0.113073	0.019128	0.080468	0.00297633	0.2383
761	MD00G1106800	4.72029	0	0.285935	0.0180453	0.00917
762	MD00G1106900	0.0716243	0.140834	0.533979	0.064108	0.0204213
763	MD00G1107100	0.585226	0.361854	0.718131	0.0542397	0.205833
764	MD00G1107200	12.7798	23.7364	8.18035	18.0433	13.2301
765	MD00G1107300	4.11504	7.97776	5.35075	6.33926	11.4001
766	MD00G1107400	1.7451	2.93256	1.82752	2.54784	1.62752
767	MD00G1107500	1.82038	1.27315	1.32998	1.33354	0.63948
768	MD00G1107600	5.27424	2.41853	2.55631	2.34077	5.60464
769	MD00G1107700	117.344	160.356	651.071	35.4094	23.329
770	MD00G1107800	0.096807	0.119761	0.0375317	0	0
771	MD00G1108000	12.2136	8.68955	7.37512	6.72736	5.5228
772	MD00G1108200	29.7479	17.7341	16.1327	17.2142	42.766
773	MD00G1108400	0	0.000367333	0	0	0
774	MD00G1108700	1.29934	1.51121	1.90215	1.07527	0.663869
775	MD00G1108900	1.25007	9.00343	0.57619	19.6162	13.221
776	MD00G1109100	0	0	0.005041	0	0
777	MD00G1109200	18.1001	1.86081	14.7748	0.0033	0.0393693
778	MD00G1109300	0.048184	0	0.00595733	0	0
779	MD00G1109400	4.83932	1.8578	2.76645	2.85674	2.93384
780	MD00G1109600	18.8381	22.4574	15.8831	21.1263	20.6264
781	MD00G1109700	53.0554	73.3495	666.219	0.788263	4.5388
782	MD00G1109800	0.831424	17.1878	2.37949	3.15169	0.0164823
783	MD00G1109900	0.989592	1.7275	3.63734	0.667441	1.07858
784	MD00G1110200	25.9261	74.9509	5.25512	36.8558	93.398
785	MD00G1110300	0.0325087	0.216307	0	0.354788	0.339233
786	MD00G1110400	5.9366	7.56132	4.86082	8.64132	4.14162
787	MD00G1110500	14.3707	10.2236	9.11581	10.6206	15.9482
788	MD00G1110700	4.06816	3.17854	3.20155	2.98516	5.81555
789	MD00G1110800	0	1.69357	0.107185	0	0
790	MD00G1110900	0.0384377	0.773601	0.0375057	0.106874	0.007065
791	MD00G1111000	0.169076	4.27062	1.29988	1.84259	0.0668227
792	MD00G1111300	0.0441533	3.6053	0.413958	1.09084	0.054295
793	MD00G1111400	0.864321	5.8697	0.784061	2.60291	0.0438053
794	MD00G1111500	1.87943	1.02963	6.71555	0.391999	1.5486
795	MD00G1111600	0.177872	0	0.102628	0	0.0831163
796	MD00G1111700	11.1072	8.11867	10.5884	5.39787	2.70253
797	MD00G1111800	47.2277	38.436	29.2437	48.8502	67.6383
798	MD00G1111900	12.7373	18.2164	12.6128	16.1349	11.5548
799	MD00G1112100	0.450229	0.00996633	0.78389	0	0.004071
800	MD00G1112200	0.314904	0.434402	0.391891	0.170196	0.0749663
801	MD00G1112300	0.586223	0	0	0	0
802	MD00G1112400	0.146047	0.046395	5.90647	0.00779033	0
803	MD00G1112500	21.7016	5.80742	2.29831	5.24703	13.228
804	MD00G1113000	0.010821	1.09867	0	0.37213	0.0481927
805	MD00G1113200	7.10215	7.78801	6.01392	5.92912	3.69767
806	MD00G1113300	0.027115	0.0353133	0.040537	0.062166	0.258068
807	MD00G1113500	0.328608	0	0.019864	0	3.56238
808	MD00G1113600	0	0.0737777	0	0	0
809	MD00G1113700	5.48804	7.21479	5.47473	4.81247	4.73159
810	MD00G1113800	3.56663	3.1692	5.39994	3.11165	3.76427
811	MD00G1113900	11.8568	11.4775	10.2241	12.6373	10.6021
812	MD00G1114000	0.045244	0.029108	0.0502513	0.0280303	0.04426
813	MD00G1114100	0.851213	0.881041	0.607003	0.675614	0.71243
814	MD00G1114200	0.07845	0.153804	0	0.243969	0.296145
815	MD00G1114300	7.81546	3.88862	2.57095	3.3042	1.93504
816	MD00G1114400	10.0625	17.7235	15.615	14.3999	12.2993
817	MD00G1114500	3.57095	1.4555	3.08603	2.34706	1.56515
818	MD00G1114600	0.499521	0.566968	1.07984	0.199412	0.0177383
819	MD00G1114700	0.00045	0.010884	0.0296147	0.0957037	0.0167033
820	MD00G1114800	28.3157	20.9716	11.3766	25.5818	39.8323
821	MD00G1115000	0.225436	0.0726657	12.0555	0.00635833	0.005687
822	MD00G1115100	1.28162	0.929007	1.24953	0.7659	0.852323
823	MD00G1115200	0.0832787	0.454726	0.160821	1.47002	0.926762
824	MD00G1115300	0.0355827	0.00318767	0.043234	0	0.303179
825	MD00G1115400	0.0182937	0.839305	0.0370803	0.0264477	26.0087
826	MD00G1115500	0	0	0	0	1.28318
827	MD00G1115600	1.68654	0.537021	2.51537	0.980014	0.506632
828	MD00G1115700	8.34389	3.83598	57.9221	3.60793	6.20783
829	MD00G1115800	0.294093	1.41092	0.115806	0.0990687	0
830	MD00G1116000	3.30327	4.14258	3.96864	5.9638	5.86122
831	MD00G1116100	2.85133	3.85109	2.96791	6.65631	2.22268
832	MD00G1116200	313.954	3.95954	1.40937	0.852876	0
833	MD00G1116300	0.0869043	0	0.105896	0	0
834	MD00G1116400	2.02257	3.67613	2.72683	1.60919	0.073411
835	MD00G1116600	0.124788	28.3453	0.389868	4.53636	0.0729877
836	MD00G1116700	1.63726	1.54148	0.963387	1.94364	2.51279
837	MD00G1117000	0.210475	0.0555503	0.750377	0.0476163	0.017962
838	MD00G1117100	0	0.0243537	0	0	0
839	MD00G1117200	0.066746	0.0337167	0.169243	0.02114	0.00387833
840	MD00G1117300	0.0486117	0	0	0	0
841	MD00G1117700	0.52969	0.003244	0.00391867	0	0
842	MD00G1118200	7.26294	0.0193663	0.161433	0	0.00588733
843	MD00G1118300	0.0237887	0.166379	0.02443	0.143907	0.0312943
844	MD00G1118400	0.00417667	0.025591	0.00196667	0.051098	0.00176867
845	MD00G1118600	3.92637	2.59834	2.44658	3.76345	2.1621
846	MD00G1118700	5.20113	131.739	17.7472	22.4307	0.032713
847	MD00G1118800	0.208864	28.7105	0.351254	28.1151	1.05225
848	MD00G1118900	0.016556	0.353133	0.0208133	0.732955	0.110345
849	MD00G1119400	4.49584	3.53206	1.3273	5.4362	0.161868
850	MD00G1119600	0	0.0127657	0.00589267	0	0
851	MD00G1119900	1.46691	2.97083	2.47473	3.01708	1.17309
852	MD00G1120000	0.006626	0	0	0	0
853	MD00G1120100	7.17156	3.58799	5.11881	4.28447	9.52144
854	MD00G1120400	7.12283	6.49696	10.9525	6.14291	3.72374
855	MD00G1120600	1.12639	0.938713	0.643429	1.42979	0.930173
856	MD00G1120700	2.00415	0.91258	1.64616	1.06892	0.473364
857	MD00G1120800	0.00119867	0	0.0179823	0	0.004729
858	MD00G1120900	0.0420843	0.0831183	0.0672977	0.0404023	0.430223
859	MD00G1121000	2.54271	2.86557	1.13211	2.39568	1.61207
860	MD00G1121200	1.91841	2.44023	1.01086	3.42781	1.39884
861	MD00G1121300	0.498601	1.61108	3.66122	0.00621467	0.0367693
862	MD00G1121500	1.75779	2.43612	8.0561	0.0137047	0.0967427
863	MD00G1121700	1.96061	3.26428	17.1911	1.27139	1.00529
864	MD00G1122000	23.8543	15.7082	13.7738	15.5637	26.3959
865	MD00G1122100	1.99893	1.46301	2.64724	1.32978	2.23981
866	MD00G1122200	0.027984	0.013932	0	0.027853	0.004722
867	MD00G1122300	0	0.00473367	0	0.0167643	0.000537
868	MD00G1122500	0	0.224532	0	0.622022	0
869	MD00G1122700	0.773297	1.12627	0.688814	0.927257	0
870	MD00G1122900	1.44157	25.66	2.6448	6.45474	0.0374263
871	MD00G1123000	6.16399	5.52082	10.8916	7.31508	7.24231
872	MD00G1123300	4.4921	3.99508	16.3454	7.44622	8.95438
873	MD00G1123600	20.8474	8.33051	3.58792	2.78095	8.0826
874	MD00G1123900	0	0.100545	0.028315	0.0144377	0
875	MD00G1124000	0	0.288315	0.092008	0.0145227	0.00700033
876	MD00G1124100	0.00298633	0.0125907	0.00234	0.00232867	0
877	MD00G1124200	0.00227767	0.161389	0.00162833	0.08059	0
878	MD00G1124400	0.0162067	4.05172	0.265681	3.09555	0.00461633
879	MD00G1124500	0.0128123	0.0295057	0.0209487	0.0477453	0.00813567
880	MD00G1124700	0	0.0125737	0	0.0260627	0
881	MD00G1124900	11.6172	6.49336	4.87306	8.88171	16.5348
882	MD00G1125100	6.50151	16.5206	3.06204	32.5769	1.59285
883	MD00G1125200	12.3778	0.10731	5.00289	0.0520843	1.17582
884	MD00G1125300	0.357504	0.0164047	0.193599	0.0106727	0.019081
885	MD00G1125400	5.33233	11.4063	18.2849	1.23066	197.291
886	MD00G1125500	11.407	10.262	7.62397	6.95795	10.3094
887	MD00G1125600	4.50945	4.20911	3.18413	3.65764	3.18128
888	MD00G1125800	0.0173233	0.154572	0.0121777	0.0686723	0.00558
889	MD00G1125900	0.796981	3.44151	1.31429	4.44223	3.93997
890	MD00G1126100	1.0256	0.667633	0.0891357	1.01687	1.22898
891	MD00G1126200	11.92	11.1027	12.4757	10.7896	9.71178
892	MD00G1126400	0.00909933	0	0	0	0
893	MD00G1126700	4.6504	0.935461	1.05187	0.495217	1.67874
894	MD00G1126800	8.87826	5.87948	9.9087	6.09645	3.76354
895	MD00G1126900	15.7994	13.6472	10.728	11.1486	19.2248
896	MD00G1127000	13.2622	10.939	9.16267	11.589	19.942
897	MD00G1127100	0	0.0120537	0.00221167	0	0
898	MD00G1127200	2.39298	38.2758	2.82137	20.5538	0
899	MD00G1127300	4.33436	3.93369	4.23308	4.00764	2.01097
900	MD00G1127400	0.938923	4.15363	4.39462	1.57527	0
901	MD00G1127500	5.54961	5.71845	2.51086	3.8796	5.78249
902	MD00G1127700	10.6731	35.7245	0.556121	35.3387	22.2709
903	MD00G1127800	0.170373	0	1.45439	0	0
904	MD00G1127900	21.2261	23.6086	17.7062	30.2616	34.9477
905	MD00G1128000	18.7931	0.0790897	0.207913	0.028702	0.015215
906	MD00G1128100	14.5021	18.1259	9.96429	18.1573	15.5808
907	MD00G1128200	6.71684	7.4868	8.12107	8.63025	5.96824
908	MD00G1128300	18.8783	20.5326	14.0528	17.1455	34.2003
909	MD00G1128400	0.135483	1.20107	0.0199107	0.353264	0
910	MD00G1128500	0.780025	5.90273	1.62322	2.64867	0.197647
911	MD00G1128800	0.0704997	0	0.215981	0	0
912	MD00G1129000	10.22	12.9695	4.38488	10.5881	9.03878
913	MD00G1129100	9.13898	15.5111	11.8734	13.0475	9.34065
914	MD00G1129200	10.5918	5.94357	9.91102	14.8618	9.90819
915	MD00G1129300	36.0037	50.9896	31.9695	59.8387	35.0482
916	MD00G1129400	2.03299	0.58334	2.58624	0.438063	0.193806
917	MD00G1129500	0.0372437	0.00188633	0.0173717	4.6455	0.0186277
918	MD00G1129700	14.3891	4.17362	6.32524	4.09087	6.16819
919	MD00G1129800	2.90576	9.14952	3.6877	5.54353	2.64932
920	MD00G1129900	0.265669	0.327998	0.466815	0.711911	0.552944
921	MD00G1130000	7.61889	2.19722	2.49034	2.51285	7.71408
922	MD00G1130100	9.3337	8.82162	7.86757	11.2882	2.97261
923	MD00G1130200	0	0.246185	0	2.21377	0.0606177
924	MD00G1130400	0	0.00572233	0	0	0
925	MD00G1130500	18.4638	5.07073	3.56854	4.7063	6.88665
926	MD00G1130600	2.5293	1.15231	0.444587	1.14768	4.66009
927	MD00G1130700	0.771068	0.732898	1.45518	1.14664	0.735198
928	MD00G1130800	0.975525	0.188433	0.110414	0.036553	0
929	MD00G1130900	16.3587	18.9322	15.7445	55.1108	28.8391
930	MD00G1131000	0.071054	4.59173	0.650444	5.33706	0.537792
931	MD00G1131100	0	0	0	0.113239	0
932	MD00G1131200	3.24359	1.31473	2.87919	1.51569	2.56299
933	MD00G1131300	6.82132	3.64226	1.43876	3.30878	5.50129
934	MD00G1131600	10.4105	6.13419	6.64257	4.37106	7.50217
935	MD00G1131800	9.83505	2.48955	1.76506	6.65299	0.201258
936	MD00G1131900	1.48941	0.148858	0.924018	0.497116	0.185733
937	MD00G1132000	0	0.0206997	0	0	0
938	MD00G1132200	0	0.0122803	0	0.00940167	0
939	MD00G1132300	9.74326	11.7011	6.47962	10.7888	9.91156
940	MD00G1132400	39.3056	11.318	3.92399	3.84493	18.2917
941	MD00G1132500	0.732511	0	0	0	0
942	MD00G1132600	11.0737	7.98285	8.14804	12.5492	6.64484
943	MD00G1133200	0.0290897	0.0244533	0.074086	0	0.011514
944	MD00G1133300	0.029375	0.12681	18.8454	0.0888203	0
945	MD00G1133400	0	0.572518	0.0297367	0.889902	0
946	MD00G1133500	0.105606	6.7518	2.21963	56.318	0.004297
947	MD00G1133600	0	0	0	0.0207863	0
948	MD00G1133700	0.173822	4.67447	3.66631	6.70621	1.00409
949	MD00G1133800	0.0417013	0.00940533	0	0	9.46076
950	MD00G1134000	11.4564	0.848286	16.3174	1.75391	0.677609
951	MD00G1134100	0.106172	1.20439	0.125889	0.248168	0
952	MD00G1134400	0.310499	0.131197	1.33714	0	0.00630433
953	MD00G1134600	2.6191	3.10015	3.09535	3.29043	2.04744
954	MD00G1134800	4.86242	4.62967	10.766	3.33583	2.89116
955	MD00G1135400	45.0135	34.6934	36.9453	28.8149	137.551
956	MD00G1135500	0.0506843	0	0.030399	1.1513	0
957	MD00G1135600	4.8207	23.2636	10.2512	34.3821	1.70071
958	MD00G1135700	3.29274	1.84033	3.75794	2.73328	1.45644
959	MD00G1135800	0.196367	0.171113	0.399953	0.218739	0.038222
960	MD00G1135900	4.75152	2.48786	5.4414	3.0849	1.88735
961	MD00G1136000	5.21373	3.07766	5.27421	3.96212	1.57487
962	MD00G1136100	0.00332933	0.278848	0.0225383	0.364938	0.008554
963	MD00G1136200	1.03337	0.199752	1.06325	0.694989	0.380731
964	MD00G1136300	30.1505	0.628499	3.64638	1.72832	2.12195
965	MD00G1136500	11.397	11.1868	7.87319	10.8561	6.71779
966	MD00G1136600	18.0668	14.943	14.5844	8.69652	16.0467
967	MD00G1136700	0.23883	0.503195	0.544763	0.326579	0.300491
968	MD00G1136800	1.52943	1.76664	3.7462	1.44748	1.96265
969	MD00G1137100	0	0	0	0.0553537	0
970	MD00G1137200	6.48792	9.37034	8.78077	9.78138	0.866278
971	MD00G1137300	4.45262	6.11909	15.6915	25.2542	1.86167
972	MD00G1137500	8.27723	8.00256	19.5905	10.0833	32.8438
973	MD00G1137700	12.6379	25.1213	35.1375	8.77752	0.023996
974	MD00G1137800	49.229	72.8797	28.0917	212.694	86.2072
975	MD00G1137900	0.0470923	0.00436467	0.794901	0	0
976	MD00G1138200	14.6313	12.835	11.7089	10.9521	13.9462
977	MD00G1138300	72.8303	52.6347	37.7855	91.9311	41.0591
978	MD00G1138500	0	1.14538	0	22.0471	0.0775443
979	MD00G1138600	0	0.020548	0	1.13396	0
980	MD00G1138700	0.027226	0.0550623	0.0233113	0.334445	0
981	MD00G1139000	3.72076	14.5001	23.1164	3.7972	0.042268
982	MD00G1139300	44.4163	67.1489	39.44	61.2003	67.8753
983	MD00G1139400	1.18197	1.14288	1.12882	1.83635	0.4248
984	MD00G1139500	0.63825	0	0	0.0238677	0
985	MD00G1139600	1.29849	1.00348	1.57515	0.995044	1.43283
986	MD00G1139700	1.2651	0	0	0.00926833	0
987	MD00G1139800	0.00551033	0	0.0629953	0	0
988	MD00G1139900	10.2804	2.265	19.0727	0.32725	0.241613
989	MD00G1140000	5.77416	0.447419	3.42657	18.8314	0.0985387
990	MD00G1140100	150.702	167.034	639.247	156.691	323.17
991	MD00G1140200	58.9205	19.2248	16.6355	11.8225	27.3513
992	MD00G1140300	2.29417	2.2367	2.05485	0.506735	0.030782
993	MD00G1140400	0	0	0	0.031461	0
994	MD00G1140500	9.0915	15.9193	6.67076	11.2027	0.176633
995	MD00G1140600	4.93165	3.33054	4.33953	3.39557	2.03825
996	MD00G1140700	27.7221	10.7711	31.1423	11.5754	16.5092
997	MD00G1140800	13.5724	11.0004	18.5777	25.5359	16.5969
998	MD00G1140900	4.27965	0.0233637	0.0190887	0	0
999	MD00G1141100	5.74927	0.0767343	2.35461	0.00170367	0.00587067
1000	MD00G1141200	6.0391	1.00919	0.139255	0.133864	0
1001	MD00G1141300	0	0.213332	0.305768	0.12088	0
1002	MD00G1141400	0.300108	0.157771	0.0456327	0	0.0139173
1003	MD00G1141500	0.0288957	0.08578	0.069297	0.019693	0
1004	MD00G1141600	0	0.0408713	0.036786	0.0372493	0
1005	MD00G1141700	4.7448	16.8407	6.05173	7.19454	1.48692
1006	MD00G1141800	0	0	0.0235987	0	0
1007	MD00G1142200	1.23602	1.08421	1.15253	1.41192	1.15009
1008	MD00G1142300	0.831604	0.0261927	0.00780633	0	0
1009	MD00G1142400	1.49128	0.766185	1.42287	0.525129	0.00520233
1010	MD00G1142500	4.98778	3.76959	2.64937	6.41125	4.09392
1011	MD00G1142600	8.21163	12.3979	4.90511	27.8218	0.831904
1012	MD00G1142700	0.016268	0.00565867	0	0	0.0107087
1013	MD00G1142800	0.0458957	0	0	0	0
1014	MD00G1143000	5.60112	0.625449	1.2917	8.42776	3.40997
1015	MD00G1143300	12.1539	17.1204	12.3679	27.1348	11.74
1016	MD00G1143500	2.79319	0.0337227	5.26647	1.09161	0.384378
1017	MD00G1143600	0.0276467	0	0	0.116939	0
1018	MD00G1143700	1.82263	1.56949	2.71326	0.889059	0.114504
1019	MD00G1143800	7.96978	1.1356	0.042025	0.687944	0.18432
1020	MD00G1144100	0.974241	0	0	0	0
1021	MD00G1144200	0	0.00472167	0	0.00225767	0.00726967
1022	MD00G1144300	3.73609	0.139845	0.561124	0.615208	0.0322763
1023	MD00G1144400	1.4431	1.59168	0.287495	6.23898	0.486361
1024	MD00G1144500	1.42281	0.316297	0.202412	0.577334	0.0204157
1025	MD00G1144700	16.8295	11.6305	13.5709	11.7355	2.1846
1026	MD00G1144800	2.9768	3.57349	23.281	0.0657293	0.484486
1027	MD00G1145000	11.3852	9.78272	7.82448	13.8557	10.436
1028	MD00G1145100	9.22591	10.3225	11.4445	5.76313	8.46049
1029	MD00G1145200	0.00209967	0.0114847	0	0.0100327	0
1030	MD00G1145300	0.00928367	0.00481467	0	0.115007	0
1031	MD00G1145400	6.686	5.01031	5.31172	7.35484	3.4732
1032	MD00G1145500	0	0.0107097	0	0	0.0243137
1033	MD00G1145600	17.8167	24.2062	13.4046	29.6131	21.1625
1034	MD00G1145700	3.58945	4.53604	4.59014	6.01692	10.3933
1035	MD00G1146200	0.141927	0.0804937	0.319351	0.164078	0
1036	MD00G1146300	0	0.00106833	0.0452097	0.0103747	0
1037	MD00G1146600	0.335698	0	0	0	0
1038	MD00G1146800	14.21	4.99142	16.798	4.9833	31.5708
1039	MD00G1146900	0.0111757	0.0573423	0.010568	0.690574	0
1040	MD00G1147000	7.19248	10.8293	10.2858	10.0122	2.84656
1041	MD00G1147100	0.992267	3.66121	1.03296	6.007	0.761393
1042	MD00G1147200	1.04909	15.8242	2.73907	29.951	9.12787
1043	MD00G1147300	0.410163	0	0	0	0
1044	MD00G1147600	0.088333	0.54752	0.0864493	0.408029	0.108588
1045	MD00G1147700	0.644887	0.968919	1.6972	0.899678	0.296787
1046	MD00G1148000	3.53682	3.51457	5.58743	3.72898	1.59439
1047	MD00G1148100	35.6151	39.9673	23.4999	40.7456	35.931
1048	MD00G1148200	48.3505	0.607028	1.00278	0.301032	0.251145
1049	MD00G1148300	2.14579	3.24485	2.03538	2.7143	3.01991
1050	MD00G1148400	1.44576	2.5222	1.87054	2.09365	1.28199
1051	MD00G1148500	3.23929	2.95482	3.7444	1.83131	4.65015
1052	MD00G1148600	0.005961	0.00900467	0.0141183	0.00906833	0.00459933
1053	MD00G1148700	0.019504	0.572011	0.193796	0.381884	1.98084
1054	MD00G1148800	0.00448667	3.82391	0.0190757	3.58039	0
1055	MD00G1148900	0	0.0178713	0.0231187	0.0218973	0
1056	MD00G1149000	29.5216	0.500542	0.275031	0.230027	0.0982713
1057	MD00G1149200	2.88032	2.47855	2.22475	2.27404	1.70334
1058	MD00G1149300	9.40656	5.58252	1.07704	1.35171	0.325861
1059	MD00G1149400	0	0.0104277	0	0	0.0550723
1060	MD00G1149500	11.5371	8.8872	7.79864	10.2015	10.861
1061	MD00G1149800	11.3828	0.064112	0.0276877	0.004481	0.852424
1062	MD00G1149900	3.8951	6.55073	3.16079	7.05883	4.7764
1063	MD00G1150000	4.7622	5.64838	5.07072	5.96783	3.28007
1064	MD00G1150100	0.487543	2.56565	0.208007	1.98273	0.147123
1065	MD00G1150400	0.0130413	0.0425583	0.0101867	0	0.0114303
1066	MD00G1150500	0.599636	0.713941	0.672731	0.55026	0.163197
1067	MD00G1150700	0.010834	0	0	0.0217447	0
1068	MD00G1150800	3.41659	4.60037	7.72686	4.61916	2.46561
1069	MD00G1150900	0.241079	0.623984	1.21946	0.642859	0.327267
1070	MD00G1151000	0.0178863	0.014061	0.0202363	0.0184453	0.0152527
1071	MD00G1151100	2.7444	3.40924	4.95105	4.21501	1.42189
1072	MD00G1151200	0.00757567	0.744338	0.00483367	1.18301	0.00197367
1073	MD00G1151300	0.253158	1.51335	0.0798393	1.99842	0.110791
1074	MD00G1151400	0.02566	0.554297	0.011228	0.99133	0.00238167
1075	MD00G1151500	1.03629	1.80965	1.10363	1.83014	0.799634
1076	MD00G1151600	0.543552	0.00562633	1.33624	0.024193	0.005691
1077	MD00G1151700	0.1882	0	0.247554	0	0
1078	MD00G1151800	0	0.861232	0.0210097	0.0741533	0.0674477
1079	MD00G1151900	0.000678333	0.000166	0.00394767	0.000752667	0.00128367
1080	MD00G1152000	8.88744	9.084	6.43097	7.72672	4.72714
1081	MD00G1152100	5.12327	10.2578	4.61591	16.5124	4.30915
1082	MD00G1152200	0.272944	0.337654	0.269163	0.576596	0.0860427
1083	MD00G1152300	0	0	0.128002	1.21966	0
1084	MD00G1152400	36.322	0.356123	53.1064	3.1617	0.709373
1085	MD00G1152500	0.5974	1.0231	0.949126	0.856428	0.669669
1086	MD00G1152600	10.2975	7.86183	78.2235	2.51434	12.3159
1087	MD00G1152700	6.12077	4.10236	3.81512	5.2595	4.22947
1088	MD00G1152800	0.0554087	0	0.167261	0.0351117	0
1089	MD00G1153200	0	0.039644	0.0508793	0	0
1090	MD00G1153300	0	0	0.0224617	0	0
1091	MD00G1153400	0.0925437	0.019361	0.639116	0.478129	0.00599433
1092	MD00G1153500	0.00321667	1.17565	0.026404	22.1282	0.075744
1093	MD00G1153600	0.007039	0.00703633	0	0.222308	0
1094	MD00G1153700	0.0100073	0.00833533	0.0352847	0.011106	0.01236
1095	MD00G1153800	0	0	0	0.007249	0
1096	MD00G1153900	0	0.000804667	0	0	0
1097	MD00G1154000	0	0	0.00987867	0	0
1098	MD00G1154100	0.524273	0.738938	0.525337	0.840965	0.250039
1099	MD00G1154200	9.0033	12.461	10.5985	12.8219	4.20469
1100	MD00G1154400	0.0260933	0	0.0288727	0	0
1101	MD00G1154700	0	0.00473067	0	0	0
1102	MD00G1154800	0	0.00473067	0	0	0
1103	MD00G1154900	0.0142267	0	0.001147	0.00112367	0.00109167
1104	MD00G1155100	0	0.0646097	0	0.123168	0
1105	MD00G1155200	5.88299	2.59365	7.29751	2.82799	2.27635
1106	MD00G1155300	0	0.007522	0	0	0
1107	MD00G1155400	4.50199	3.99548	1.88632	6.70426	7.74539
1108	MD00G1156000	1.20986	3.04762	3.91149	3.29625	1.74658
1109	MD00G1156100	0.127196	0.414817	0.0202087	0.191259	0
1110	MD00G1156200	21.1593	5.32693	5.81396	6.40716	16.036
1111	MD00G1156300	3.48263	2.29468	2.45357	3.62205	0.69202
1112	MD00G1156400	0.473602	0.331487	0.650196	0.679077	0.708315
1113	MD00G1156500	3.5509	4.17595	3.41465	4.96429	5.75576
1114	MD00G1156600	0	0	0	0.0263043	0
1115	MD00G1156800	3.81935	1.59325	3.42189	0.504673	0.081924
1116	MD00G1156900	4.99392	4.76595	3.89627	5.95403	5.24008
1117	MD00G1157000	0.01502	0.0293773	0.00582133	0.271335	0
1118	MD00G1157200	0.0407843	0.0189793	2.15132	81.3199	0
1119	MD00G1157300	19.7926	5.62007	4.52939	8.8377	6.52969
1120	MD00G1157400	10.8958	14.7005	11.3789	20.7757	8.43456
1121	MD00G1157500	0.431347	0.838875	0.532069	0.858138	0.125845
1122	MD00G1157700	0	0.0358473	0	0.0132517	0
1123	MD00G1158000	2.50376	1.00829	2.38768	1.70563	2.11482
1124	MD00G1158300	0.408551	0.0336517	0.0678187	0.166289	0.00749267
1125	MD00G1158400	0	0	0	0	0.018913
1126	MD00G1158500	0.0953483	3.14124	0.305673	3.71945	0.0694403
1127	MD00G1158700	0.0331147	0.628269	0.106164	5.6622	0.0192307
1128	MD00G1158800	0.0233503	0.396846	0.114431	1.36074	0.0158927
1129	MD00G1158900	1.00523	1.49635	1.69714	1.528	1.00646
1130	MD00G1159000	0.973904	0.845892	1.31871	1.12081	0.183164
1131	MD00G1159100	0.861082	12.9434	2.13026	2.88024	0.01412
1132	MD00G1159200	1.28987	1.73023	0.784671	7.47003	0.07372
1133	MD00G1159300	136.16	139.973	105.855	101.114	149.084
1134	MD00G1159400	13.2514	3.2501	5.98668	4.01719	5.60494
1135	MD00G1159500	4.72382	4.92387	3.14809	7.15205	4.13224
1136	MD00G1159900	0.628073	0.824375	0.430099	0.906419	0.50476
1137	MD00G1160000	1.87266	0.863953	1.60785	0.940625	1.24164
1138	MD00G1160200	1.13347	2.67973	3.47344	1.27923	5.7901
1139	MD00G1160300	0.572737	3.33722	1.98913	1.04165	7.52429
1140	MD00G1160400	0	0	0.247515	0	0
1141	MD00G1160500	5.48219	9.75722	4.82231	8.73715	9.89787
1142	MD00G1160600	7.05374	8.36659	6.60179	8.19008	8.71976
1143	MD00G1160700	78.1272	92.5115	57.7273	78.4538	84.0885
1144	MD00G1160800	0.0190753	0.156759	0.00369267	0.0860763	0.039843
1145	MD00G1160900	0.152549	0.358845	0.269311	0.323357	0.104226
1146	MD00G1161000	4.47561	13.3547	12.2609	11.2837	4.381
1147	MD00G1161100	0.575402	0.267337	0.6795	0.540815	2.56872
1148	MD00G1161300	2.5983	5.64411	4.47145	7.17466	6.17362
1149	MD00G1161400	18.1194	17.7717	180.088	0.238244	1.8314
1150	MD00G1161500	0	0	0	0.161843	0
1151	MD00G1161600	0	0.0166323	0.022005	0.0457053	0.0353287
1152	MD00G1161700	0.082903	0	0.030613	0	0
1153	MD00G1162000	7.64143	2.16661	1.0782	1.01776	7.484
1154	MD00G1162100	0.0768237	0.047417	0.0143113	0.613662	0
1155	MD00G1162200	0.055303	0.1168	0	0.0927887	0.0565053
1156	MD00G1162300	0.0269073	0.0775857	0	0.564749	0
1157	MD00G1162900	0.10894	0.0110853	0.004595	0.19997	0.0512467
1158	MD00G1163000	19.5939	15.9622	10.5364	11.5997	19.6655
1159	MD00G1163200	0.063038	0.335731	0.176089	0.277589	0
1160	MD00G1163300	0.149138	1.8852	1.20668	0.675566	0
1161	MD00G1163400	2.26225	0.970972	3.51242	0.391801	0.313391
1162	MD00G1163800	4.66252	2.59673	6.97141	1.97531	0.925175
1163	MD00G1163900	4.25145	3.51155	2.02844	2.29326	0.963482
1164	MD00G1164000	12.9644	15.0164	10.7278	16.9767	10.7545
1165	MD00G1164400	1.68037	0.00413733	0.0145467	0.0121833	0
1166	MD00G1164700	2.779	0.400462	0.29734	3.59514	0
1167	MD00G1164900	4.79972	4.46228	3.64886	4.61032	3.28733
1168	MD00G1165000	3.4459	4.35741	3.81817	3.29591	3.39306
1169	MD00G1165100	2.64869	3.61846	2.37062	3.59527	14.6624
1170	MD00G1165200	15.0123	0.124474	17.5897	0.049318	0.095272
1171	MD00G1165300	0.0556603	0	0.00294633	0	0
1172	MD00G1165400	3.24015	16.8232	9.8603	16.1656	2.49602
1173	MD00G1165500	0	0.0922477	0.277869	0.098891	0
1174	MD00G1165600	6.92704	30.8882	21.446	11.9277	2.70164
1175	MD00G1165700	1.71329	13.4272	3.88343	18.2817	0.412357
1176	MD00G1165800	2.15517	0.739325	0.883902	1.10125	2.25144
1177	MD00G1165900	0.028328	0	0	0.101367	0
1178	MD00G1166100	7.09914	0.0132397	1.03439	0.119712	0.939218
1179	MD00G1166400	0.378257	1.02453	0.983728	1.06305	0.0207657
1180	MD00G1166500	3.99632	0.267156	0.0120433	0.276483	1.48185
1181	MD00G1166600	3.84378	0.215009	0.000871	0.120306	0.641462
1182	MD00G1166700	2.30239	1.13579	1.2326	1.44296	1.5418
1183	MD00G1166800	1.35236	1.7063	1.01801	2.64267	1.1002
1184	MD00G1167000	33.3358	1.90612	3.52189	87.2984	0.0327723
1185	MD00G1167500	0.00851367	0	0	0	0
1186	MD00G1167700	2.88734	3.17965	3.45932	7.12599	2.36387
1187	MD00G1167800	0.663738	0.724671	0.364781	0.592944	0.424919
1188	MD00G1167900	0.012066	0.01251	0.0127827	0.00794567	0.010821
1189	MD00G1168000	1.44122	1.88263	1.53768	2.36523	1.38441
1190	MD00G1168100	0.726583	0.288855	0	0	0.0672967
1191	MD00G1168200	0.456633	0.298366	0.363585	0.288386	0.177562
1192	MD00G1168300	3.78506	1.55582	0.993756	2.24693	2.1149
1193	MD00G1168400	4.48445	2.83977	1.87995	3.32805	2.83449
1194	MD00G1168500	0.120116	0.475294	0.195101	0.243398	0.274876
1195	MD00G1168600	0.453664	0.157701	0.256735	0.196361	0.116683
1196	MD00G1168800	1.39904	1.21781	1.28389	0.962394	0.509879
1197	MD00G1169400	8.08194	4.85848	10.8151	1.91606	5.5128
1198	MD00G1169500	1.64482	2.18253	1.8634	8.20453	4.02684
1199	MD00G1169600	6.13596	2.25104	6.01988	5.83347	2.99345
1200	MD00G1169700	0	0.0381327	0.010835	0.381065	0.006793
1201	MD00G1169800	0	0.0231653	0.011478	0.378826	0.00304167
1202	MD00G1169900	0.0636473	0.394076	0	0.313509	0.0107467
1203	MD00G1170000	0.175447	0	0.388875	0.0853637	0
1204	MD00G1170100	0.0216507	0.071726	0.003385	0.0845547	0.0315073
1205	MD00G1170400	0.058603	0.0862797	0.0690273	0.013206	0.0879297
1206	MD00G1170600	0.00292333	0.11622	0.002949	0.510886	0
1207	MD00G1170700	0.585136	0.947478	0.556144	0.944289	0.185685
1208	MD00G1170800	1.42467	2.66309	1.85956	2.77511	1.9311
1209	MD00G1170900	0.0112677	0.00195133	0.00365733	0	0
1210	MD00G1171100	33.7018	55.0857	24.2378	56.006	60.6136
1211	MD00G1171200	12.7412	7.03796	6.96663	6.18199	9.07145
1212	MD00G1171400	2.30251	1.13133	1.44231	1.02757	3.56839
1213	MD00G1171600	0.324091	2.03357	3.59553	2.81404	0
1214	MD00G1171700	0	0	0	0.00110367	0
1215	MD00G1171800	16.5408	0.506453	1.93791	4.25034	3.06564
1216	MD00G1171900	7.38354	3.303	3.53921	3.90484	5.82408
1217	MD00G1172000	0.0278933	0.024052	0	0.0126437	0.0176583
1218	MD00G1172100	10.2764	55.6804	11.4494	81.6464	15.2414
1219	MD00G1172200	0.155496	0.128063	0.244111	0.159016	0.0581027
1220	MD00G1172400	2.13564	1.26096	2.93322	2.37544	0.442581
1221	MD00G1172500	0.1613	0.233327	0.879069	0.622639	0
1222	MD00G1172700	0.097023	0	0.00188533	0	0
1223	MD00G1172900	1.3235	1.4819	3.14307	13.4258	0.0213873
1224	MD00G1173000	2.2587	0.352623	0.019541	0	0.0325707
1225	MD00G1173100	0.014411	0.082249	0.195943	0.0167197	0
1226	MD00G1173300	15.0489	38.6906	18.8275	81.3417	33.2614
1227	MD00G1173600	1.86604	2.12413	2.91389	1.13993	0.611479
1228	MD00G1173700	30.5561	17.0032	17.3433	21.9428	22.2116
1229	MD00G1173800	8.51224	3.65913	0	2.01437	4.12327
1230	MD00G1173900	0.139595	0.0354177	0	0.0922913	0.102646
1231	MD00G1174300	3.54208	3.90959	4.54298	3.49272	2.28606
1232	MD00G1174400	38.9981	0.200997	22.8316	0.870447	0
1233	MD00G1174500	1.23203	0.506064	1.83098	0.325245	0.384563
1234	MD00G1174600	0.0990137	0.289549	0.274313	0.230416	1.53887
1235	MD00G1174900	0	0	0	0.371535	1.71451
1236	MD00G1175000	0	0.0106047	0	3.06111	0.00645033
1237	MD00G1175100	0	0	0	2.94339	0
1238	MD00G1175200	0.00463733	0.00199333	0.500502	4.00684	0
1239	MD00G1175300	0.331319	0.0914913	0	0	0
1240	MD00G1175400	2.88953	5.5197	1.95243	5.35174	1.29479
1241	MD00G1175500	10.2263	11.3647	9.61161	2.58562	12.7824
1242	MD00G1175600	9.29281	16.8281	8.3752	17.7452	6.0012
1243	MD00G1176100	2.64217	0.8284	3.95321	0.22225	0.00871667
1244	MD00G1176300	23.8576	44.3788	24.182	32.6104	22.9401
1245	MD00G1176400	1.85193	11.0085	4.63027	0.675429	0.00830733
1246	MD00G1176700	1.45932	0.048388	1.34711	0.0494397	2.41645
1247	MD00G1176800	5.86346	0.287019	0.0332037	0.0117693	0
1248	MD00G1176900	0.000824333	0.287862	0.00868733	0.028734	0.00790967
1249	MD00G1177000	0.596415	0.423364	0.883063	1.30103	0.135692
1250	MD00G1177100	0.882402	0.885656	2.01299	2.20443	0.165778
1251	MD00G1177200	2.0482	4.65914	3.38214	3.94013	1.13459
1252	MD00G1177300	10.4785	8.83192	7.51553	8.49512	11.655
1253	MD00G1177400	15.1742	23.5964	16.4863	26.832	16.3687
1254	MD00G1178200	0.099967	0.066318	0.258338	0.0833617	0
1255	MD00G1178300	0.484255	0.698452	0.200449	3.58878	0.243164
1256	MD00G1178400	3.76285	7.56258	6.67727	4.78367	0.291318
1257	MD00G1178700	0.000400667	0.000299	0.001026	0.000684333	0
1258	MD00G1178900	0	0.125122	0	0.390936	0
1259	MD00G1179000	10.9626	9.34719	4.3211	12.0023	17.1857
1260	MD00G1179100	0.001772	0.00597733	3.2515	1.79287	1.29376
1261	MD00G1179200	6.21685	5.89474	2.82738	2.21043	8.71634
1262	MD00G1179300	198.008	74.113	82.4156	56.6687	200.524
1263	MD00G1179400	0	0.355751	0.144198	1.19271	0
1264	MD00G1179500	8.7499	13.3687	9.60002	13.9542	7.47176
1265	MD00G1179600	0.01023	0.056169	0	0	0
1266	MD00G1179700	0	0	0.0138783	0	0
1267	MD00G1179800	5.24317	6.48936	5.1676	6.97112	3.28008
1268	MD00G1179900	0.0766803	0	0	0	0
1269	MD00G1180100	19.1016	0.982943	2.05486	1.70919	0.176419
1270	MD00G1180200	1.92636	2.27628	1.98895	2.30233	2.34402
1271	MD00G1180300	4.69137	4.9266	5.88571	4.48044	2.54865
1272	MD00G1181300	14.9198	11.6624	9.65099	7.54645	16.0178
1273	MD00G1181400	15.868	14.3666	17.3414	68.8273	118.261
1274	MD00G1181600	0.0134153	0	0	0	0
1275	MD00G1181800	6.19375	5.21583	10.2986	3.59412	6.25699
1276	MD00G1182100	29.1273	12.8647	7.17994	10.3566	15.3954
1277	MD00G1182200	1.42555	1.13466	0.591303	1.7533	1.03335
1278	MD00G1182300	0.250858	0.287346	0.422622	0.373818	0.250133
1279	MD00G1182600	0.636752	0.368878	0.4579	0.812834	0.630318
1280	MD00G1182800	0.385708	0.00296767	0	0.057027	0.0105573
1281	MD00G1183000	1.42186	0.437032	0.22443	0.337007	0.197936
1282	MD00G1183100	0.000882667	0	0	0.00883067	0
1283	MD00G1183300	0	0.0173637	0	0.0557317	0
1284	MD00G1183400	38.0745	24.5565	21.1623	23.7757	33.7211
1285	MD00G1184000	0.158591	0	0.012618	0.499317	0
1286	MD00G1184100	0	0	0	0.363313	0
1287	MD00G1184200	5.24878	6.90853	3.65513	2.27325	1.41424
1288	MD00G1184300	24.8391	19.5551	14.0576	12.6488	39.0277
1289	MD00G1184400	0	0	0	0	0.0113267
1290	MD00G1184900	10.097	12.3175	8.04115	11.9449	11.3001
1291	MD00G1185200	13.0863	4.1329	3.31373	5.46088	8.15952
1292	MD00G1185300	0.316094	0.385862	0.972072	0.120028	0.119368
1293	MD00G1185400	10.3947	14.9151	4.0842	9.01357	0.589987
1294	MD00G1185500	0.00289433	0.136154	0.158142	0.831495	0.0559033
1295	MD00G1185600	9.65451	3.55855	12.0668	6.41423	10.4629
1296	MD00G1185700	25.9834	30.6818	30.0698	22.8683	39.9854
1297	MD00G1185800	31.6486	0.0502927	0.605072	0.0458447	0
1298	MD00G1185900	0.128238	0.022601	0.0897813	0	0.0110827
1299	MD00G1186000	0.009448	0	0.422532	0	0
1300	MD00G1186100	9.4057	21.6045	10.8643	16.8884	3.52644
1301	MD00G1186200	6.4649	7.87537	8.32411	6.38468	6.78036
1302	MD00G1186400	0.0193437	0	0.020716	0	0.07221
1303	MD00G1186500	0.0447713	2.82963	0	0.438631	0
1304	MD00G1186600	0.649565	2.56341	0.636558	4.17617	4.13685
1305	MD00G1186700	0.652232	0.58734	0.342034	0.540825	0
1306	MD00G1186800	0.013844	0	0	0	0
1307	MD00G1186900	21.0845	38.2286	20.8287	34.5453	32.667
1308	MD00G1187000	0.142586	0.137355	0.01704	0.047713	0.0245807
1309	MD00G1187100	4.01238	14.3758	3.43431	16.5609	9.23657
1310	MD00G1187200	0.205614	77.3733	1.01803	163.813	31.6184
1311	MD00G1187300	0.72595	1.42955	1.22782	2.15151	1.70848
1312	MD00G1187400	0.00793967	0.006883	0.0277203	0.0265073	0.0340003
1313	MD00G1187500	4.88195	2.43072	3.96528	2.25374	2.40179
1314	MD00G1187600	0.311567	0	0.00466667	0.108344	0
1315	MD00G1188100	0.408228	0.161426	0.292082	0.198394	0.0853983
1316	MD00G1188200	6.09121	6.25937	4.46153	4.16598	4.21016
1317	MD00G1188300	0.0627507	0.051613	0.0496483	0.0748983	0.192984
1318	MD00G1188400	3.28897	2.09374	1.91858	1.9629	1.36231
1319	MD00G1188500	0.043624	0.252906	0.0181447	0.546216	0.08156
1320	MD00G1188600	2.84778	2.82768	2.45232	2.33349	2.94434
1321	MD00G1188700	4.41654	4.05205	1.71764	3.91521	1.80497
1322	MD00G1188900	0.0137617	0.411162	0.070301	0.144189	0
1323	MD00G1189000	0.596759	7.14631	2.21121	1.14662	0
1324	MD00G1189200	7.68089	0.040016	7.49823	0.015953	22.6396
1325	MD00G1189300	0.0750467	0	0	0	0
1326	MD00G1189400	0.319272	0.505022	0.629123	2.84962	0.650679
1327	MD00G1189600	3.38795	4.90436	3.11288	6.61477	1.25326
1328	MD00G1189900	0	0	0	0.00349667	0
1329	MD00G1190200	0.002622	0.015694	0.301498	0.013919	0
1330	MD00G1190500	35.4318	15.0662	11.9205	6.76608	10.2584
1331	MD00G1190600	0.010137	0	0	0.0113163	0
1332	MD00G1190700	0.576159	11.6309	0.226042	30.6379	0.567075
1333	MD00G1190800	176.049	87.3448	73.4686	33.4108	17.5374
1334	MD00G1190900	0.328243	0.181146	0	0.0797553	0.004534
1335	MD00G1191600	8.08343	2.91333	14.0764	0.968029	0.999192
1336	MD00G1191700	1.35638	0.60657	1.97448	0.191218	0.024154
1337	MD00G1191800	4.65891	5.52829	13.7451	3.47059	8.78332
1338	MD00G1191900	0	0.004829	0.39051	0	0
1339	MD00G1192100	0	0	0.08521	0	0
1340	MD00G1192300	2.29246	0	0.007711	0	0
1341	MD00G1192400	3.57569	22.6179	5.97292	27.1956	6.09531
1342	MD00G1192500	0.316128	20.8203	0.331521	34.5613	2.13418
1343	MD00G1192700	0.44906	0.143868	0.457896	0.183429	0.093359
1344	MD00G1192800	0.0237407	0.0755517	0.634749	0.0638663	0
1345	MD00G1192900	0.0315493	0.455413	0.546063	0.113463	0.00243667
1346	MD00G1193000	1.43028	1.02226	1.47197	1.14945	0.583117
1347	MD00G1193100	0.0292457	0.698313	0.815281	0.011299	0.0604753
1348	MD00G1193200	0.05929	0	0	0	0
1349	MD00G1199400	0.43938	1.89343	0.51209	2.0375	1.3134
1350	MD00G1199500	0.003655	0.113611	0	0.082864	0
1351	MD00G1199600	28.2957	7.93931	128.154	3.6246	6.6523
1352	MD00G1199900	1.79998	0	0	0	0
1353	MD00G1200000	11.9779	0.138046	0.245213	0.021997	0.006011
1354	MD00G1200100	29.6862	0.029664	0.0545573	0.031954	34.5872
1355	MD00G1200200	0.043769	0.100503	0.0582123	0.0682977	0.009059
1356	MD00G1200300	11.787	65.1606	87.2429	26.9989	0.0587977
1357	MD00G1200900	7.61986	9.14458	8.14813	5.18106	6.27829
1358	MD00G1201000	4.36377	3.93263	3.10669	3.4648	3.06036
1359	MD00G1201200	0.843123	0.0274383	1.7487	0.126255	0.0884817
1360	MD00G1201300	0.524874	0.0174823	1.00772	0.0691793	0
1361	MD00G1201600	14.5422	21.5478	20.2987	26.7392	7.75372
1362	MD00G1201700	0.172048	0.0749013	0.0529427	0	0
1363	MD00G1201800	0.0111437	0.493931	0.136332	0.012353	0.19645
1364	MD00G1201900	0	0.0241163	0	0	4.29117
1365	MD00G1202300	4.28902	1.80282	3.78399	1.52426	0.987892
1366	MD00G1202400	2.64493	1.04071	2.46905	0.822047	0.657279
1367	MD00G1202500	0.002718	0	0	0	0
1368	MD00G1202600	1.15404	7.01999	3.34642	3.42165	0.0450813
1369	MD00G1202900	0.144003	0.274295	0.148999	0.00986133	0.030936
1370	MD00G1203200	0	0.242531	0	2.09987	0.130854
1371	MD00G1203300	0.332704	0	0.00737567	0	0
1372	MD00G1203400	2.15796	5.77565	2.11357	10.0496	1.56678
1373	MD00G1203500	4.40796	10.8172	0.215734	1.70552	2.5396
1374	MD00G1203600	0.383274	0.397556	0.395006	0.846178	0.212938
1375	MD00G1203700	0.218594	0.388682	0.802747	1.48839	0.116724
1376	MD00G1203800	4.84874	3.89461	4.722	3.19051	5.06002
1377	MD00G1204100	5.0462	2.27826	4.90439	3.22775	2.95515
1378	MD00G1204500	11.2876	0.0157023	0.0507523	0	0
1379	MD00G1204600	0.0559927	36.2738	3.13565	5.45058	0
1380	MD00G1204700	39.5466	19.1845	25.7109	17.5245	26.6534
1381	MD00G1205100	1.80558	0	0.008226	0	0
1382	MD00G1205200	0.710666	0.154921	0.148403	0.534675	0.154105
1383	MD00G1205500	2.45161	0	0	0.00806567	0
1384	MD00G1205700	12.7275	11.8227	14.344	16.1604	9.50593
1385	MD00G1205900	0.006484	0	0.0140077	0.0781603	0
1386	MD00G1206000	0.00209667	0.132126	0.044946	0.996372	0
1387	MD00G1206300	0	0.25351	0.01356	1.23813	0
1388	MD00G1206400	7.70437	4.52597	2.81654	5.04565	6.58476
1389	MD00G1206500	0.990852	1.32493	0.717325	0.72514	0.492827
1390	MD00G1206600	5.10657	5.79472	2.98676	3.91071	8.21738
1391	MD00G1206700	0.061713	0	0.00728467	0.694395	0
1392	MD00G1206800	0.766136	0.835841	0.784454	1.56078	0.363617
1393	MD00G1207000	2.73529	5.31418	3.64299	1.6127	0.365573
1394	MD00G1207100	0	0	0.0125963	0	0
1395	MD00G1207200	0.0981557	0	0	0	0
1396	MD00G1207300	3.75088	9.86001	3.61708	7.10063	19.881
1397	MD00G1207400	0.104664	0.0815553	0.0243773	0.433743	0.337597
1398	MD00G1207500	0.0344077	0.12595	0.114977	0.0899527	0
1399	MD00G1207600	0.017267	0.0192647	0.056933	0	0
1400	MD00G1207700	0.0205167	0.072922	0.0957413	0.00863167	0
1401	MD00G1207800	0.00605567	0.104039	0.177679	0.0380267	0.00258
1402	MD00G1208000	0	0	0	1.80517	0.00632933
1403	MD00G1208200	0.927169	1.97613	1.63481	1.49417	1.48889
1404	MD00G1208300	0.73771	11.1027	0.580414	1.97173	0.0443387
1405	MD00G1208400	4.75265	1.88438	4.6018	2.76767	2.12187
1406	MD00G1208500	5.35059	4.6597	0.0260213	1.70442	3.66273
1407	MD00G1208600	1.74641	2.69141	2.85171	2.77739	2.68706
1408	MD00G1214100	46.9936	40.0545	21.6745	44.2934	87.5325
1409	MD00G1214200	4.2012	1.97109	5.10538	0.887408	28.2523
1410	MD00G1214300	0.0225837	0.002369	0	0.001095	0.005121
1411	MD00G1214400	0.673413	0.735629	0.574429	1.11127	0.819348
1412	MD00G1214500	1.92899	2.65138	2.36881	2.13869	1.3001
1413	MD00G1214600	4.1361	0.0333077	0.023909	0.00496167	0
1414	MD00G1214800	8.04096	5.82788	5.31257	7.66988	6.42114
1415	MD00G1214900	0.152038	0	0	0	0
1416	MD00G1215000	0.0160103	0	0	0.0477207	0
1417	MD00G1215200	0.956369	0	0	35.5028	0
1418	MD00G1215600	1.82596	0.695178	0.98559	0.356996	0.320971
1419	MD00G1215700	0.592682	0.972404	0.553292	0.651187	0.501626
1420	MD00G1215800	0.368915	0.300354	0.209115	0.421183	0.411015
1421	MD00G1220000	1.67099	2.21094	0.037466	1.86645	0.048462
1422	MD00G1220200	0.946688	1.88024	0.209956	1.24562	1.19718
1423	MD00G1220300	5.28194	1.15619	0.428859	1.39484	37.0782
1424	MD00G1220400	1.71142	5.10301	4.27471	4.38549	1.6662
1425	MD00G1220600	8.63546	15.4313	36.6949	12.4479	4.44698
1426	MD00G1220700	0.019752	0	0	0	0
1427	MD00G1220800	3.61949	1.01333	1.77232	1.42986	3.98932
1428	MD00G1220900	6.83365	2.53111	2.78992	2.82962	10.2874
1429	MD00G1221000	8.42246	4.04139	20.9133	3.84225	3.51216
1430	MD00G1221100	0	0.0225097	0	0.0311553	0.0557127
1431	MD00G1221200	0.0115777	0	0.0103203	0	0
1432	MD00G1221400	28.2992	30.4477	51.7992	24.0274	138.137
1433	MD00G1221800	0	0.0992027	0	0.108265	0
1434	MD01G1000100	1.49983	0.00185233	0	0	0
1435	MD01G1000200	0.0269703	0.451766	0.0473643	1.60304	0.213432
1436	MD01G1000300	1.27078	2.30473	6.2968	0.18737	0.159029
1437	MD01G1001200	1.77906	1.25307	1.83734	1.37658	1.18378
1438	MD01G1001300	0	0	0.0107353	0	0
1439	MD01G1001600	280.641	357.275	171.459	368.434	759.631
1440	MD01G1001900	4.48986	6.23705	3.99096	6.50673	9.39574
1441	MD01G1002000	1.03613	0.676134	1.39021	1.93878	1.65337
1442	MD01G1002100	0.0208577	0.015045	0	0.00300067	0
1443	MD01G1002400	6.03334	6.39993	3.68329	4.61235	3.52907
1444	MD01G1002500	0.626965	0	0.0226967	0.0105543	0
1445	MD01G1003000	0	0.061019	0	0.00808267	0
1446	MD01G1003600	6.69267	3.23372	32.5267	0.226992	0.244306
1447	MD01G1003700	0.315489	0.241602	1.26277	0.00790233	0
1448	MD01G1003800	6.40684	5.8292	4.34791	6.61969	5.67106
1449	MD01G1004000	19.7123	2.72314	2.4881	1.74439	2.02877
1450	MD01G1004100	0.631438	0.0805233	0.499882	0.174271	0.272879
1451	MD01G1004200	9.51906	11.1028	12.9238	9.02915	8.10191
1452	MD01G1004300	24.162	37.7059	501.291	0.528383	2.88334
1453	MD01G1004400	0	0.506673	0	0.0397767	0.0182997
1454	MD01G1005100	4.72638	0.024205	0	0	0
1455	MD01G1005300	0.045238	2.26812	0.465988	1.31615	0
1456	MD01G1005400	5.93448	5.4518	21.6666	1.53418	2.8759
1457	MD01G1005500	16.5952	14.415	9.57745	9.84263	14.5948
1458	MD01G1005600	4.15303	6.24859	4.41815	4.93804	6.20848
1459	MD01G1005700	6.36706	4.47368	7.91607	2.57667	4.32458
1460	MD01G1005900	3.52981	2.40866	2.52849	1.29423	1.33924
1461	MD01G1006000	0.360568	0.471309	0.272417	0.297406	0.344378
1462	MD01G1006100	0	0.0255817	0.000962667	0.885422	0
1463	MD01G1006200	0.0439137	1.65815	0.00797833	1.03828	0.136676
1464	MD01G1006300	6.82903	4.88537	6.86732	3.48077	3.30713
1465	MD01G1006400	7.45511	7.70855	7.58951	7.85826	3.15922
1466	MD01G1006600	0	0.0115593	0	0	0
1467	MD01G1006900	0.00981633	0.0319293	0.0513583	0.0281207	0
1468	MD01G1007200	0.384611	0.35986	1.43196	0.37167	0
1469	MD01G1007300	0.818187	0.565912	0.795553	0.229816	0.0282053
1470	MD01G1007700	0.479367	0	0	0	0
1471	MD01G1007800	0.0352293	0	0.0609153	0	0
1472	MD01G1007900	0.0205527	0.0159543	0	0.035967	0
1473	MD01G1008700	0.782091	2.03829	1.31121	0.871398	0.0713667
1474	MD01G1008800	0.201027	0.400435	0.243037	0.256551	0.263655
1475	MD01G1008900	9.67848	15.8358	13.3778	11.9548	10.7248
1476	MD01G1009700	5.08752	0.0591073	2.46275	0.00428167	0.002857
1477	MD01G1009800	0.301319	0.733452	0.139427	0.751521	0.0903467
1478	MD01G1009900	0.0266717	0.0141657	0.0253173	0.018022	0.0265877
1479	MD01G1010000	2.57498	2.24371	2.00728	1.46505	1.05689
1480	MD01G1010100	11.7856	31.8225	17.8629	14.1775	4.49138
1481	MD01G1010200	0.0384493	0.172725	0.0105303	0.030576	0
1482	MD01G1010300	4.58391	19.5323	4.33319	14.3565	5.42679
1483	MD01G1010900	15.0961	4.30454	2.74672	7.11907	7.32487
1484	MD01G1011600	0.519317	0.079685	0.131273	0.160531	0.00387033
1485	MD01G1011700	3.46921	3.63049	9.16224	2.22337	5.46103
1486	MD01G1011800	0.561284	0.585516	0.620504	0.826998	0.232227
1487	MD01G1012000	2.69008	1.88616	3.18988	1.0882	1.82364
1488	MD01G1012100	17.0487	17.937	15.7893	20.1959	11.8139
1489	MD01G1012300	7.62133	11.7797	8.19088	10.5461	11.1269
1490	MD01G1012400	0	0.0872733	0	0.0212433	0
1491	MD01G1012600	2.1296	9.08734	5.35149	4.64336	0.045657
1492	MD01G1012700	0.146701	0	0	0	0
1493	MD01G1012800	0.175804	0	0.00940967	0	0
1494	MD01G1013000	0	0.00239267	0.04732	0.00313933	0
1495	MD01G1013200	0.0743963	0.203159	0	2.61706	0.0340473
1496	MD01G1013300	0.722571	0.746376	0.145858	0.146809	0.00607
1497	MD01G1013400	4.73249	3.96076	3.79936	4.68379	3.5152
1498	MD01G1013500	0.471921	2.4017	0.514222	3.57264	0.222389
1499	MD01G1013800	0.859796	0.013026	0.486974	0.0513447	0.0256653
1500	MD01G1014200	10.408	3.42601	4.44805	3.26772	2.80348
1501	MD01G1014300	17.7506	9.11079	8.67057	5.20617	6.95773
1502	MD01G1014400	0.00896533	0	0	0.0185977	0
1503	MD01G1014700	0.851734	0.387132	0.998819	0.189481	0.395817
1504	MD01G1014800	0.00317133	0.00345667	0	0.154895	0
1505	MD01G1015400	0	0.0217743	0	0	0
1506	MD01G1015700	0	3.81779	0.832008	0	0
1507	MD01G1015800	4.43382	5.21112	3.98696	5.28763	2.97417
1508	MD01G1016100	0.0705213	0.0534597	0.0190927	0.0794507	0
1509	MD01G1016400	0.0219283	0	0.002365	0.25143	0
1510	MD01G1016500	10.0584	6.60461	7.41329	4.74757	10.9157
1511	MD01G1016600	4.06204	10.8687	4.64871	12.7328	8.3399
1512	MD01G1016700	3.5534	2.28785	3.04205	1.92596	2.88079
1513	MD01G1017000	3.84058	3.50141	2.83577	3.17216	2.47282
1514	MD01G1017100	0.181395	0.532326	1.16516	0	0
1515	MD01G1017400	5.03835	3.76054	3.30319	4.38548	3.27779
1516	MD01G1017500	0.00637567	0.00630067	0	0	0
1517	MD01G1017700	7.05115	5.20286	5.4156	3.13296	8.48062
1518	MD01G1017800	0.693215	0.204358	0.64056	0.395426	0.327299
1519	MD01G1017900	6.42627	6.90559	21.1774	3.013	2.63246
1520	MD01G1018100	2.70337	2.73099	2.55523	2.08918	1.57585
1521	MD01G1018200	0.659541	0.604322	0.534554	0.347242	0.452346
1522	MD01G1018400	0.025434	0.763706	0.0913323	0.523099	0.0212907
1523	MD01G1018500	0	0	0.0291453	0.00281167	0
1524	MD01G1018600	0.0129347	0.472859	0.020364	0.190967	0
1525	MD01G1018800	1.52878	1.07192	1.27345	1.44598	1.18285
1526	MD01G1019000	4.15556	1.98267	1.35583	2.12542	0.058644
1527	MD01G1019500	11.2587	5.09838	10.592	16.016	11.7156
1528	MD01G1019600	0.355023	0.418986	0.451309	0.308605	0.040512
1529	MD01G1019700	21.1296	21.8838	22.6385	23.8552	19.6644
1530	MD01G1019800	14.852	12.3528	10.253	15.1806	15.4052
1531	MD01G1020100	27.1476	30.3943	13.6272	19.9103	89.7949
1532	MD01G1020300	25.267	30.8199	23.7406	35.781	26.7051
1533	MD01G1020500	0.715724	0.920148	0.739673	0.948024	0.686005
1534	MD01G1020600	5.61792	0.0106937	0.0878337	0.00862633	0
1535	MD01G1021000	235.38	93.8577	106.346	68.2933	202.878
1536	MD01G1021200	22.0455	0.0903193	0.135216	0.0369817	0
1537	MD01G1021300	0.0412753	0	0	0	0
1538	MD01G1021600	2.32593	5.05834	0.471454	17.5858	4.25789
1539	MD01G1021700	0.103963	0	0	0.641746	0
1540	MD01G1021800	13.8333	12.4183	11.4145	15.9155	14.1121
1541	MD01G1022300	36.1607	14.7237	27.0742	10.9889	77.8961
1542	MD01G1022400	11.4563	12.8158	7.57217	10.9465	22.2302
1543	MD01G1022500	4.07174	3.57093	5.64202	4.59505	2.15143
1544	MD01G1022700	41.4019	32.2081	34.1437	30.3837	23.3001
1545	MD01G1022800	0.0248213	0.00822967	0.0398377	0.160495	0.039563
1546	MD01G1023000	0.542212	0.00868567	0.515254	0	0.234212
1547	MD01G1023100	0.0982007	0.0488563	0.0330363	0.0599593	0.00892
1548	MD01G1023200	1.87429	2.12649	2.39312	2.1345	1.34414
1549	MD01G1023400	0.105084	7.97087	0.113463	9.8831	0.826148
1550	MD01G1023500	0.692885	0.00752967	0	0	0
1551	MD01G1023800	2.10486	1.21097	2.10569	1.3694	1.19994
1552	MD01G1023900	21.391	13.7675	11.6052	11.7239	23.2782
1553	MD01G1024000	39.8927	13.405	13.0352	7.8774	27.8792
1554	MD01G1024100	2.01535	4.55133	2.12843	3.63397	1.75531
1555	MD01G1024200	7.91309	20.5282	3.66563	4.12749	0.434333
1556	MD01G1024400	25.1234	24.0675	22.5243	21.9237	101.46
1557	MD01G1024500	0.222627	2.52376	0.349681	1.38402	0
1558	MD01G1024600	0.105821	14.7529	1.62928	14.2053	0
1559	MD01G1024900	35.0218	31.4958	18.7461	47.8747	40.2778
1560	MD01G1025300	6.18464	3.13252	14.9074	8.25194	5.73399
1561	MD01G1025400	1.00154	0.726158	3.16694	8.00819	1.24117
1562	MD01G1025500	0.858057	5.1758	0.694444	2.23184	0.0186807
1563	MD01G1025600	0.0497543	0.0223207	0.0167823	0.146624	0.161439
1564	MD01G1025800	3.62268	3.22824	2.47589	1.9509	3.76368
1565	MD01G1025900	0.020507	0	0.0104113	0	0
1566	MD01G1026000	1.42219	2.78584	2.15816	2.1427	1.20548
1567	MD01G1026100	0.0709533	0.296827	0.0368053	0.043464	0.0126153
1568	MD01G1026200	1.78849	15.3763	8.40396	4.46283	0.1144
1569	MD01G1026300	1.78961	14.4748	7.94154	4.35363	0.112984
1570	MD01G1026400	14.2579	1.24205	2.39525	1.57819	12.3389
1571	MD01G1027000	5.33827	3.70479	5.97854	4.53743	2.92328
1572	MD01G1027300	10.9769	0.0217627	0.084226	0	0
1573	MD01G1027400	66.7745	63.6118	70.5038	64.379	6.26799
1574	MD01G1027500	4.06018	0.0179223	0.035041	0.005031	0.0202987
1575	MD01G1027600	5.34729	6.28201	5.53106	5.68304	4.26699
1576	MD01G1027700	0	0.0441633	0	0	0
1577	MD01G1027800	0.15067	0.0302223	0.272996	0.203217	0
1578	MD01G1027900	0.003772	0.208937	0.00227133	3.50097	0.00898267
1579	MD01G1028300	5.59979	17.594	6.57107	23.5698	1.56873
1580	MD01G1028400	0	0	0.123679	0	0
1581	MD01G1028500	2.71182	6.08871	3.35977	4.11328	1.0429
1582	MD01G1028700	0.010957	0.002446	0.0339867	0.14144	0
1583	MD01G1028800	0.12209	0.379296	0.204532	0.257168	0.0772037
1584	MD01G1029000	29.2654	37.2569	27.5921	28.347	12.5405
1585	MD01G1029100	130.054	150.909	45.4891	125.72	351.837
1586	MD01G1029200	1.68297	0.667257	0.0413353	0.0994657	0.00429533
1587	MD01G1029300	0.294771	0.359319	0.134818	0.453375	0.207314
1588	MD01G1029500	0.65963	0.981135	1.22016	0.975084	0.91109
1589	MD01G1029700	27.0315	26.3098	22.9737	32.7138	32.9491
1590	MD01G1029800	17.8243	17.6076	11.777	16.9046	16.4822
1591	MD01G1029900	0.233579	0.735704	0.177075	0.971158	0
1592	MD01G1030100	27.4196	21.5777	19.708	20.5049	51.5153
1593	MD01G1030300	0.0240057	0.0599587	2.81869	0.017853	0.0360893
1594	MD01G1030600	16.7647	0.607814	0.545651	0.837283	9.87345
1595	MD01G1030700	0	0.000136333	0	0	0
1596	MD01G1030800	0.870015	0.64661	0.709527	1.10836	0.311097
1597	MD01G1030900	1.81644	4.85443	1.88608	5.8287	1.93439
1598	MD01G1031100	6.81603	10.6426	5.94837	10.1433	4.53791
1599	MD01G1031200	11.1353	11.0799	8.36844	10.4419	13.8211
1600	MD01G1031300	13.4449	9.73615	33.836	9.4631	6.17813
1601	MD01G1031400	6.30345	2.34935	4.75077	1.70162	1.27311
1602	MD01G1031700	0.0128323	2.43935	0.0267	0.388151	0.018593
1603	MD01G1032000	4.04433	11.2699	5.97789	16.4451	1.76188
1604	MD01G1032200	16.2074	11.1634	11.1041	13.3015	20.3685
1605	MD01G1032300	0.492002	0.682481	0.931857	0.790487	0.750505
1606	MD01G1032400	4.63416	4.35864	2.85269	2.43502	1.50573
1607	MD01G1032500	0.77616	3.0982	0.61919	0.386373	0.083292
1608	MD01G1032700	37.8676	0.946094	0.649407	3.37863	1.39615
1609	MD01G1032800	0.656565	0.120963	1.31401	0.05242	2.2764
1610	MD01G1033000	6.48936	19.3676	11.313	12.3697	0.733689
1611	MD01G1033200	0.236058	0.00356533	0.003151	0.000370667	0.000123
1612	MD01G1033300	0.282987	0.024283	0.298029	0	0
1613	MD01G1033400	11.5124	17.4874	11.5475	13.3234	12.2943
1614	MD01G1033500	2.53734	3.45962	4.10075	3.46393	1.77303
1615	MD01G1033600	0.0792987	0	0.0409833	0.0903257	0
1616	MD01G1033700	0	0.028692	0	0	0
1617	MD01G1033800	0.00801633	0.005913	0	0	0
1618	MD01G1034000	11.6897	11.8358	9.38121	8.18175	4.23514
1619	MD01G1034100	0.69174	3.34395	1.60964	2.58986	0.225765
1620	MD01G1034200	14.7873	20.7257	14.8037	19.0794	30.9741
1621	MD01G1034300	14.2521	30.9073	9.84755	41.5816	14.5597
1622	MD01G1034400	1.3981	1.67708	1.90379	3.21674	2.72596
1623	MD01G1034500	1.571	0	2.16233	0.037562	1.26344
1624	MD01G1034900	0.450073	0.00701967	0.253522	0	0.068565
1625	MD01G1035000	21.3107	10.4002	5.24601	5.21453	3.51146
1626	MD01G1035100	3.64447	5.19613	1.29052	7.64594	4.76912
1627	MD01G1035300	152.635	221.553	236.699	247.57	66.8104
1628	MD01G1035400	5.57888	4.91181	3.52422	6.33233	5.5333
1629	MD01G1035500	3.36944	4.46008	3.45517	5.35664	3.08109
1630	MD01G1035600	7.69268	3.19914	1.93216	2.77292	4.28287
1631	MD01G1036100	0.0109343	0.139469	0.029727	0.356081	0.007506
1632	MD01G1036200	74.0572	120.805	56.1305	312.813	50.9679
1633	MD01G1036500	17.6495	8.8283	16.8839	10.6471	15.0814
1634	MD01G1036600	11.3753	9.17549	7.39679	10.2359	5.20225
1635	MD01G1036700	2.79883	7.27588	0.404339	0.869499	0.043549
1636	MD01G1036800	0.033084	0.0371097	0.032195	0.0110147	0.00569533
1637	MD01G1036900	7.33006	4.88155	2.94982	8.872	5.12101
1638	MD01G1037000	2.536	3.55518	2.82894	2.69941	1.20704
1639	MD01G1037100	0.0664	1.27925	0.028708	0.999914	0
1640	MD01G1037300	0.403948	0.0767557	0.676251	0.162415	0.0891053
1641	MD01G1037400	16.1785	2.66993	1.94449	4.65791	1.71098
1642	MD01G1037500	2.07698	2.37113	3.67685	2.60167	3.63786
1643	MD01G1037600	0.179982	0.231689	0.192501	1.05547	1.37815
1644	MD01G1037700	42.9128	90.8935	29.0937	112.656	117.181
1645	MD01G1037800	0.0956773	0	0	0	0
1646	MD01G1037900	0.165918	1.14983	0.20599	0.208581	0.0404917
1647	MD01G1038000	12.9782	4.92921	4.22153	5.52791	4.12574
1648	MD01G1038200	3.41128	5.05627	3.89073	4.14848	2.16408
1649	MD01G1038300	2.62742	4.76996	16.0951	10.089	0.210107
1650	MD01G1038500	0.00615367	0	0.016751	0	0
1651	MD01G1038600	1.10417	13.5647	17.0674	15.2424	0.0229763
1652	MD01G1038700	17.6839	0.116969	0.658203	0.089138	3.8102
1653	MD01G1038800	18.538	9.66294	40.1988	6.65782	16.2335
1654	MD01G1038900	0.968811	0.00755667	1.29065	0	1.43079
1655	MD01G1039100	20.3063	16.7068	14.9812	12.2105	31.0614
1656	MD01G1039200	20.8496	26.3553	38.8689	18.7602	17.9645
1657	MD01G1039300	11.6898	4.85747	8.01439	5.72396	9.58864
1658	MD01G1039400	1.70459	1.29269	1.89404	0.548013	0
1659	MD01G1039500	11.6466	9.94266	20.96	17.9953	3.36616
1660	MD01G1039700	7.02142	1.77739	0.595964	0.434795	6.9364
1661	MD01G1039800	6.12403	48.7283	7.62532	45.1319	4.69376
1662	MD01G1039900	3.16282	4.9111	3.25321	5.31416	1.50356
1663	MD01G1040200	0.427578	0.0378163	14.0546	0.004333	0
1664	MD01G1040300	0.23542	8.04272	1.69154	0.557613	9.45185
1665	MD01G1040700	0.899165	6.09964	0.490997	8.68639	0.041714
1666	MD01G1040800	6.23005	4.35407	0.811354	0.928318	0.0116797
1667	MD01G1040900	3.17609	3.35958	2.72166	3.93513	1.75433
1668	MD01G1041100	3.32801	2.23485	5.92626	4.75291	2.35462
1669	MD01G1041200	1.10952	1.62119	1.48916	1.34959	1.38931
1670	MD01G1041300	2.82894	2.82807	0.251656	5.96283	54.7764
1671	MD01G1041500	0.474782	2.36554	1.04323	1.35914	0
1672	MD01G1041700	0.887858	0.142889	0.946873	0.240003	0.19739
1673	MD01G1041800	0	0.00835067	0.010259	0	0
1674	MD01G1041900	0.713832	0.0419167	1.07067	12.2623	0.472517
1675	MD01G1042100	0.00666767	0.337121	0.100616	0.055117	0.0207503
1676	MD01G1042400	5.99434	9.40102	5.51494	9.43144	6.60923
1677	MD01G1042500	0.715753	1.74319	0.661944	1.13775	1.58931
1678	MD01G1042600	0	0.002477	0	0	0
1679	MD01G1042700	1.29744	1.92203	1.23779	2.08414	1.98733
1680	MD01G1042800	0.687835	1.58395	0.436197	0.973156	2.05354
1681	MD01G1042900	0	0.002437	0	0	0.00267433
1682	MD01G1043100	37.702	9.58452	92.8274	1.0003	0.516605
1683	MD01G1043200	0.0199987	0	0.0310067	0	0.003187
1684	MD01G1043300	1.58276	3.27867	3.60248	2.11216	0.7517
1685	MD01G1043900	0.147802	0.0738633	0.0122743	0.636184	0.0202783
1686	MD01G1044000	0.0216833	0	0	0	0
1687	MD01G1044100	81.5316	30.399	294.336	0.514054	26.8675
1688	MD01G1044200	39.3597	31.571	21.6522	32.0428	50.8411
1689	MD01G1044400	15.489	17.3456	17.3352	15.1304	18.2855
1690	MD01G1044500	1.55402	2.50986	2.30646	7.25573	0.548065
1691	MD01G1044600	0.0319817	0	0.035919	0.415917	0
1692	MD01G1044700	6.20635	4.94235	11.5431	7.76065	1.98235
1693	MD01G1044800	1.25608	1.21224	1.47627	0.791305	0.953719
1694	MD01G1044900	20.8073	9.84358	7.10458	8.67294	9.38527
1695	MD01G1045000	0.00321	0.0389207	0	0	0
1696	MD01G1045200	19.7527	32.7753	30.5262	48.6784	11.7204
1697	MD01G1045300	8.70304	9.36538	6.104	5.81721	9.69516
1698	MD01G1045500	8.06179	12.9105	1.10149	17.4654	48.5136
1699	MD01G1045600	2.3016	3.8147	2.9821	3.77024	1.33656
1700	MD01G1045700	0.910071	1.57975	0.695193	8.52305	0.571703
1701	MD01G1045800	40.4545	73.924	47.2106	75.335	25.1169
1702	MD01G1045900	12.2216	11.7845	5.94222	26.2456	64.6454
1703	MD01G1046000	8.65771	6.40081	5.68404	7.42175	14.2038
1704	MD01G1046100	9.03757	10.8765	7.38156	15.9708	8.21866
1705	MD01G1046200	7.98898	9.47737	1.18176	15.2852	0.0911987
1706	MD01G1046300	0.858323	0.0124767	1.08216	0.00127533	0.678098
1707	MD01G1046400	14.1949	17.5095	20.0105	15.5922	10.0744
1708	MD01G1046500	6.28251	5.70454	6.30993	5.31876	4.9207
1709	MD01G1046600	6.25928	0.565211	0.293191	0.0930737	0.480911
1710	MD01G1046700	3.33331	1.37612	2.93604	0.0166153	5.40629
1711	MD01G1046800	0.583191	0.417058	0.711053	0.40647	0.158217
1712	MD01G1046900	2.08482	4.27793	3.36968	4.06008	2.11952
1713	MD01G1047000	6.88581	4.84954	5.48837	3.46738	2.62857
1714	MD01G1047200	0.033544	0.334825	0.00556833	4.70347	0.0190403
1715	MD01G1047400	0.323663	0.813535	0.125038	1.12231	0.150702
1716	MD01G1047600	6.62607	0.888838	4.97281	0.009873	0
1717	MD01G1047800	0.0216257	0.006779	0	0	0
1718	MD01G1047900	0	0	0	0	0.038005
1719	MD01G1048000	0	0.0503857	0	0.0664167	0
1720	MD01G1048300	0	0	0.00565567	0	0
1721	MD01G1048400	0	0	0.026659	4.48065	0
1722	MD01G1048500	8.84643	6.31086	5.70999	6.7196	7.97937
1723	MD01G1048600	17.2241	16.386	9.32749	17.2302	25.6679
1724	MD01G1048700	0.313312	0.251567	0.274629	0.406506	0.107488
1725	MD01G1048800	85.9173	458.198	23.0969	297.173	171.627
1726	MD01G1048900	4.4053	0.0663773	0.0267827	0.140595	0.005223
1727	MD01G1049100	9.63702	4.25831	6.72409	5.65166	6.24557
1728	MD01G1049200	3.85088	6.34352	11.7392	4.22884	3.95412
1729	MD01G1049300	4.50443	0.0843097	0.246081	0.313231	0.0426667
1730	MD01G1049500	0	0	0.00651433	0.341043	0.875934
1731	MD01G1049600	0.405515	0.010587	0.0588407	1.84213	0.375081
1732	MD01G1049700	0.937269	0.207769	1.2855	1.39601	0.458745
1733	MD01G1050000	0	0	0.0291043	0	0
1734	MD01G1050100	39.0331	12.2788	4.1202	15.2341	7.61106
1735	MD01G1050200	5.8944	1.83037	8.60132	0.0811673	0.495434
1736	MD01G1050300	19.2821	23.8113	10.1483	14.9674	30.2248
1737	MD01G1050400	1.12035	0.00106367	0.981987	0	0.821851
1738	MD01G1050500	4.5002	23.634	7.38166	15.4253	3.62629
1739	MD01G1050600	2.15546	0.525975	0.68579	0.40948	0.028754
1740	MD01G1050800	28.7883	7.23628	20.2032	13.6137	15.0121
1741	MD01G1050900	15.1971	3.22144	12.92	5.19225	5.73299
1742	MD01G1051100	37.1041	28.7731	22.7374	32.3219	33.3985
1743	MD01G1051200	46.5921	42.8976	59.4752	42.4474	55.5948
1744	MD01G1051300	2.6949	1.96752	2.91706	1.39657	0.164747
1745	MD01G1051400	4.74265	19.1919	7.97112	23.3115	6.80922
1746	MD01G1051600	0	1.24595	0.06367	0.119545	0
1747	MD01G1051700	7.19797	4.98638	5.11016	11.839	8.82513
1748	MD01G1051800	15.2066	22.8921	8.98354	14.7571	0
1749	MD01G1051900	0	0.570893	0.00368433	0.120616	218.036
1750	MD01G1052000	0	0	0	0	0.057319
1751	MD01G1052200	0.595414	0.129489	0.796333	0.0181513	1.39298
1752	MD01G1052300	40.1989	20.2914	30.8502	21.8976	36.1716
1753	MD01G1052400	31.1192	26.6834	18.3714	22.9209	23.2835
1754	MD01G1052500	0.0296387	0.0165897	0.289319	0	0
1755	MD01G1052600	0.00721133	0.0104277	0.0592907	0.161823	0
1756	MD01G1052700	0.293599	0.51962	0.877329	1.7107	0.309488
1757	MD01G1052800	1.39409	5.01277	0.672472	8.31161	1.4747
1758	MD01G1053000	1.18638	0.846672	1.09916	0.783433	1.21328
1759	MD01G1053100	2.96508	9.0954	3.77249	16.9395	4.74913
1760	MD01G1053200	17.7967	9.14741	14.4912	5.5366	11.4781
1761	MD01G1053300	0.302614	0.377302	0.197745	0.862854	0
1762	MD01G1053400	59.6431	36.9514	54.6233	17.5379	25.5957
1763	MD01G1053500	0.009197	0	1.4e-05	0	4.06667e-05
1764	MD01G1053600	1.23992	0.830628	1.30715	0.908339	0.570219
1765	MD01G1053700	21.0997	19.6297	22.7952	17.8537	51.8987
1766	MD01G1054200	26.6395	23.7751	16.4141	19.7017	16.9269
1767	MD01G1054400	6.39271	7.93914	2.03795	11.2233	27.2401
1768	MD01G1054500	65.8954	0.238899	0.243269	0	0
1769	MD01G1054800	1.40487	0.85183	2.13111	0.320803	0.114525
1770	MD01G1054900	0.146051	0.00355	0.70496	0.00122767	0.109902
1771	MD01G1055000	31.4631	80.4477	86.2196	84.136	63.5489
1772	MD01G1055100	0.891702	1.40012	1.50565	1.59648	0.689725
1773	MD01G1055200	0.2458	0.00473067	0.771486	0.040716	0
1774	MD01G1055300	16.878	0.102012	0.0516167	0	0
1775	MD01G1055400	13.7237	41.4792	13.3051	40.3212	24.6207
1776	MD01G1055500	0	0	0.0235933	0.86388	0
1777	MD01G1055700	1.95496	1.48287	2.12888	2.10469	1.47903
1778	MD01G1055800	0.269803	0	0.294462	0	0.156732
1779	MD01G1055900	0.0139963	0	0.38246	0.755695	0.217862
1780	MD01G1056000	0.07064	0	0.488927	1.9101	0.146976
1781	MD01G1056100	0.00956467	0	0	0	0
1782	MD01G1056200	1.28779	3.06053	6.24544	2.48906	0.18563
1783	MD01G1056300	2.03164	2.60866	2.40652	2.45633	0.860666
1784	MD01G1056400	1.02219	0.0298037	0.949728	0.011651	0.604229
1785	MD01G1056500	1.11069	0.00228233	0.620598	0	0.654904
1786	MD01G1056600	1.00933	2.19302	1.90357	2.73492	2.25183
1787	MD01G1056700	0.769851	0	0.172975	0	0.186011
1788	MD01G1056800	0.822123	0.176716	1.22954	0.114791	0.172092
1789	MD01G1056900	0.007816	0	0.008543	0.002244	0
1790	MD01G1057000	0.331838	0	0.208832	0.0444913	0.0512033
1791	MD01G1057100	1.65226	2.41692	2.0276	1.81781	0.97747
1792	MD01G1057300	0.436433	0.14056	0.534607	0.274761	0.030242
1793	MD01G1057400	0.193946	0.109325	0.135533	0.00414833	0.0146023
1794	MD01G1057500	3.05679	3.68263	4.19208	2.46129	2.91392
1795	MD01G1057600	2.34854	1.92407	3.53605	0.711597	1.03422
1796	MD01G1057900	0.168998	0.576031	0.191176	0	0.051219
1797	MD01G1058200	4.04004	6.21651	3.3002	4.11806	4.94153
1798	MD01G1058300	7.26617	5.68473	6.50109	4.20357	2.083
1799	MD01G1058400	3.5533	3.84175	3.78231	2.38893	0.876892
1800	MD01G1058500	4.11535	2.76414	3.66936	2.62647	0.445264
1801	MD01G1058600	30.0982	23.9109	13.1306	21.436	20.2581
1802	MD01G1058800	0	0	0.0360677	0	0.204316
1803	MD01G1058900	0.0784033	0.126421	0.119854	0.135288	0.159762
1804	MD01G1059100	0.06535	1.02024	0.351147	1.19603	0.450253
1805	MD01G1059200	8.88689	5.49668	8.72265	3.92222	8.39102
1806	MD01G1059300	1.45381	2.17692	1.5188	2.73219	0.619756
1807	MD01G1059600	0.0827227	1.29964	0.948629	0.357037	0.270478
1808	MD01G1059700	0.754757	1.55461	1.93933	0.246183	0.211162
1809	MD01G1059800	10.8177	15.9867	7.6134	10.8389	4.09806
1810	MD01G1059900	8.83278	14.2033	7.55514	9.25459	2.80076
1811	MD01G1060200	7.85531	6.39121	12.8874	7.41921	3.20242
1812	MD01G1060300	1.57903	0.446408	0.740876	6.89651	0.0449723
1813	MD01G1060400	0	0	0	0.00708933	0
1814	MD01G1060500	0.437935	0.488691	1.19083	0.489608	0
1815	MD01G1060600	14.8657	10.4628	9.5856	9.58972	6.26027
1816	MD01G1060700	5.32262	6.29945	5.80344	6.15434	4.09214
1817	MD01G1060800	5.16881	30.6865	9.01079	35.6882	0.236759
1818	MD01G1060900	2.354	12.5305	3.86328	17.4892	0.0749653
1819	MD01G1061000	0.040959	0.142748	0.402774	0.0508817	0.161648
1820	MD01G1061100	8.02768	3.06741	4.11342	2.38979	5.7064
1821	MD01G1061400	6.3351	3.44984	5.58615	5.24835	4.50568
1822	MD01G1061500	37.9571	9.19496	21.2844	7.77283	10.0285
1823	MD01G1061600	1.18406	0.981798	0.173321	0.72664	0.0236783
1824	MD01G1061700	0.455982	0.0382317	0.189172	0.133216	0.047877
1825	MD01G1061800	1.08036	2.02536	2.05738	1.45633	0.526931
1826	MD01G1061900	0	0.0147213	0	0.052825	0
1827	MD01G1062000	0.0938843	0.018277	0.0736503	0.796607	0.0120797
1828	MD01G1062100	1.19772	5.21208	2.57088	9.27264	1.54947
1829	MD01G1062200	0.822354	0.150436	0.14807	0.24902	0.00890633
1830	MD01G1062300	0	0	0.018197	0.0143007	0
1831	MD01G1062400	0	0.0381937	0	0.09296	0
1832	MD01G1062500	0.536694	0.190149	0.465185	2.95798	0.0422523
1833	MD01G1062600	0.21283	1.03012	0.50037	2.29124	0.217488
1834	MD01G1062700	0.31293	0.314448	0.891657	1.85328	0.125599
1835	MD01G1062800	128.781	393.382	121.782	567.352	776.996
1836	MD01G1063000	11.6544	4.58734	12.2412	4.87198	12.8831
1837	MD01G1063100	0.548222	0	0.238807	0	0.285416
1838	MD01G1063200	1.45055	0.0624537	3.28573	0	0.564421
1839	MD01G1063300	2.39384	0.160793	11.6069	0.0967167	1.30581
1840	MD01G1063400	1.7462	0.0253193	5.88465	0	0.902365
1841	MD01G1063600	0.5834	0.287664	0.838907	0.551146	0.60769
1842	MD01G1063700	0.00308667	0	0	0	0
1843	MD01G1063800	0.921379	0.186345	1.3399	0.208658	0.589258
1844	MD01G1063900	0	0.013618	0.0489713	0.0389253	0
1845	MD01G1064000	1.69741	1.46551	1.26474	1.47614	2.86564
1846	MD01G1064100	0.599739	0.381326	0.804223	0.566	0.662369
1847	MD01G1064200	0	0.0499997	0.05971	0.0349853	0
1848	MD01G1064300	0	0.0124997	0.013602	0.0560683	0
1849	MD01G1064400	0	0.0292217	0.0983207	0.053742	0
1850	MD01G1064500	1.87139	2.61961	2.22823	1.66998	1.53453
1851	MD01G1064600	0.00309767	0.000922	0	0.0739207	0
1852	MD01G1064700	0.0108267	0	0.0114587	0	0
1853	MD01G1064800	6.86556	4.1676	24.7138	0.443262	6.09528
1854	MD01G1064900	1.05436	0.117793	2.5844	0.298592	0.0176207
1855	MD01G1065000	8.32476	8.95854	6.76663	5.55189	4.61114
1856	MD01G1065100	8.45974	13.8627	5.1476	20.2098	31.2938
1857	MD01G1065200	12.0099	8.79589	15.2691	9.74151	16.159
1858	MD01G1065300	68.7691	36.9423	34.1483	27.5769	55.5222
1859	MD01G1065600	5.66428	18.6056	8.84846	2.6566	248.399
1860	MD01G1065800	23.0295	24.4146	15.7818	19.7593	10.5063
1861	MD01G1065900	19.3823	54.2053	21.9109	86.5865	72.9589
1862	MD01G1066000	0.817456	0.529736	0.392693	0.348534	0.1122
1863	MD01G1066100	1.07474	0.0929207	0	0.0109883	0
1864	MD01G1066200	0.798238	3.20622	2.70212	1.80858	0.976091
1865	MD01G1066300	0.285958	0.0951643	0.088473	0.061788	0.04318
1866	MD01G1066500	4.59593	12.5564	5.97244	15.1223	26.7196
1867	MD01G1066700	0	0	0.000575667	0.0216207	0.0936647
1868	MD01G1066900	0.105731	2.36831	0.928287	0.687481	0.53882
1869	MD01G1067000	1.2906	0.0446997	0.311922	0.0722787	0.554855
1870	MD01G1067200	3.79429	2.28403	2.48238	2.92292	2.90509
1871	MD01G1067400	0.304573	0.262107	0.502411	0.615278	0.0125213
1872	MD01G1067600	0.13188	0	0.096801	0.025244	0
1873	MD01G1067700	10.8027	0.0749943	0.03324	0	0
1874	MD01G1067800	9.43435	10.8782	2.5149	7.04208	0.691012
1875	MD01G1067900	0.221646	1.19344	0.102556	0.113233	0.0243833
1876	MD01G1068000	0	0.0190003	0	0	0
1877	MD01G1068100	0	0	0	0.0438487	0
1878	MD01G1068200	0.837587	0.0409097	0.320331	0.049768	0.198252
1879	MD01G1068300	3.99423	0.285528	5.04207	0.104948	5.0541
1880	MD01G1068400	0.707136	0.699133	0.396291	0.570729	0.559981
1881	MD01G1068500	4.24254	0.716091	0.276179	0.79842	4.37062
1882	MD01G1068600	0.105024	0.30565	0.0404917	0.2911	0.0645133
1883	MD01G1068700	1.6077	0.641359	0	0.949723	0
1884	MD01G1068800	0.000579333	0.000371333	0.116947	0.000139667	4.73333e-05
1885	MD01G1068900	37.1463	167.913	129.752	163.821	3.52391
1886	MD01G1069000	0.0954213	0.463634	0.829132	0.584014	0.003773
1887	MD01G1069100	24.1012	27.8197	23.1951	29.2773	15.0428
1888	MD01G1069200	35.2808	57.1572	35.2465	65.3301	48.0013
1889	MD01G1069300	8.93615	6.91037	6.85603	8.88317	4.39901
1890	MD01G1069400	50.8971	53.6011	30.4576	47.6814	83.7222
1891	MD01G1069500	2.74027	2.93241	7.01532	0.449032	1.05644
1892	MD01G1069600	9.50115	11.6921	6.42676	8.73817	8.71076
1893	MD01G1069700	0	0	0	0.0351413	0
1894	MD01G1069800	20.7527	10.2083	89.9183	7.834	38.987
1895	MD01G1069900	12.9362	17.6815	6.45133	13.6698	13.3585
1896	MD01G1070000	3.28082	7.85988	3.64888	12.1101	6.06718
1897	MD01G1070100	7.94487	11.7553	7.36521	8.78699	8.56801
1898	MD01G1070200	4.54555	4.22116	1.95322	3.65722	11.7536
1899	MD01G1070300	23.5852	101.002	5.75853	39.2518	39.526
1900	MD01G1070400	3.43161	0.00698433	0.0436993	0.118378	0
1901	MD01G1070500	1.95649	5.21703	3.49883	5.40505	0.709968
1902	MD01G1070600	1.03592	3.04462	2.10024	1.7199	1.40627
1903	MD01G1071100	2.22284	0.270907	0.407981	0.250891	2.27917
1904	MD01G1071200	14.2379	13.6738	9.94298	14.309	21.2246
1905	MD01G1071300	0.866416	0.295218	1.39059	1.42546	0.045075
1906	MD01G1071400	2.76617	1.97003	3.03718	1.72489	1.82316
1907	MD01G1071500	10.6291	12.6912	7.93924	13.1008	14.1455
1908	MD01G1071600	0.0108807	0.424456	0.019026	0.032186	0.175676
1909	MD01G1071700	0.006588	0.0361297	0	1.33077	0.025597
1910	MD01G1071800	28.3473	0.958353	0.144262	0.999115	0.539583
1911	MD01G1071900	18.6851	17.091	15.0138	2.96035	516.699
1912	MD01G1072000	0.0758927	21.1023	1.1219	2.69005	0.0883673
1913	MD01G1072100	3.45599	3.84282	7.94015	35.0225	12.4631
1914	MD01G1072300	0	0	0.111901	0	0
1915	MD01G1072400	0	0.027796	0	0	0
1916	MD01G1072500	62.3217	282.801	46.8242	162.788	158.802
1917	MD01G1072600	14.4766	6.34505	10.0991	6.04921	10.7611
1918	MD01G1072900	3.2548	15.9446	12.0769	8.69982	9.32164
1919	MD01G1073000	59.1062	13.2918	17.5178	12.3605	16.3519
1920	MD01G1073100	15.5288	20.0613	29.7757	11.9676	10.2748
1921	MD01G1073200	7.62948	4.35064	10.4901	5.6257	4.8615
1922	MD01G1073300	8.4668	6.62865	8.11368	4.76989	9.44929
1923	MD01G1073400	9.17712	8.29043	11.0972	6.16446	5.39871
1924	MD01G1073500	8.17796	7.23147	6.42968	8.47547	4.58974
1925	MD01G1073600	84.662	37.9765	13.5579	36.9539	277.546
1926	MD01G1073700	19.2774	2.29209	0.326885	1.38786	1.44452
1927	MD01G1073800	10.0472	11.3368	7.68633	6.24877	14.1287
1928	MD01G1073900	0.0279847	0.01713	0.0650487	0.040247	0
1929	MD01G1074000	6.87723	7.91632	11.9123	8.54164	2.02643
1930	MD01G1074300	24.7151	25.1463	16.8455	30.0995	20.6432
1931	MD01G1074400	29.1101	25.9705	249.645	5.78577	10.5425
1932	MD01G1074500	1.69647	0.134905	0.0386443	0.0602573	0.008826
1933	MD01G1074600	0.460022	0.006216	0.0943083	0.140866	0.00336567
1934	MD01G1074700	22.8273	10.6413	5.45741	15.882	9.68975
1935	MD01G1074800	1.81467	3.38677	2.76307	2.57948	0.242081
1936	MD01G1075000	1.17221	0.0249963	0.468701	0.0148113	0.170608
1937	MD01G1075300	94.1402	176.06	57.4415	198.015	65.6171
1938	MD01G1075400	0.510589	1.25859	0.902944	0.448434	0.0271063
1939	MD01G1075500	1.46321	1.97252	1.12688	0.692999	0
1940	MD01G1075600	0.453364	1.16219	1.19646	1.25719	0.20338
1941	MD01G1075800	6.47992	1.92978	3.92974	1.27068	5.88514
1942	MD01G1075900	0.12935	0.317899	0.009363	0.00641533	0.0265933
1943	MD01G1076000	4.89213	4.77494	3.71238	3.29686	0.0188277
1944	MD01G1076100	7.3	10.8679	10.0795	8.51413	8.73406
1945	MD01G1076200	3.01881	7.06021	534.333	5.00295	0.300291
1946	MD01G1076300	0.0887023	0	0	0	0
1947	MD01G1076400	21.1848	6.20082	17.6206	0.699452	3.66686
1948	MD01G1076500	58.9719	45.5747	34.0004	61.8871	16.8136
1949	MD01G1076900	2.80683	8.04631	4.35381	7.87922	0.870218
1950	MD01G1077000	0.488592	0.138601	5.16903	0.910248	0.045298
1951	MD01G1077100	21.8525	12.2947	11.5911	11.4295	9.81008
1952	MD01G1077200	4.45979	2.93943	6.73241	27.8659	0.45089
1953	MD01G1077400	0	0	0.020821	1.06056	0
1954	MD01G1077600	0.02329	0.016026	0	0.00430433	0.385016
1955	MD01G1077800	3.13713	3.6337	0.979919	2.35896	8.48407
1956	MD01G1077900	21.1654	18.3389	7.33262	6.18121	21.9601
1957	MD01G1078000	2.85029	1.13967	8.47889	2.62669	0.393034
1958	MD01G1078100	0	0	0.0801257	0	0.0104213
1959	MD01G1078400	0.375179	0.225998	0.964452	0.0171833	0.245968
1960	MD01G1078500	7.31298	18.3851	51.9215	1.86858	3.29847
1961	MD01G1078600	4.50467	0.208012	0.711206	0.0125427	0.0794607
1962	MD01G1078800	0.950009	0.946363	1.71128	1.19467	0.41331
1963	MD01G1078900	27.721	25.227	22.8837	46.1379	45.4825
1964	MD01G1079000	0.118655	0	0.00278967	0.051091	0
1965	MD01G1079100	3.68439	4.11066	3.50386	4.98262	6.15733
1966	MD01G1079200	7.39758	8.65499	8.12126	6.98576	5.25344
1967	MD01G1079300	6.22939	8.44259	9.41194	9.05885	7.34133
1968	MD01G1079500	21.8468	23.2521	26.4306	18.3143	9.78714
1969	MD01G1079600	0.89153	1.66958	5.31276	6.44863	0.187068
1970	MD01G1079700	0	0	0.033622	0	0
1971	MD01G1079800	0.023826	0.204111	0	0.100368	0.016823
1972	MD01G1079900	6.54037	8.71362	6.12187	7.38526	6.29544
1973	MD01G1080000	3.55196	4.87041	2.44159	4.62333	3.56697
1974	MD01G1080100	0.522021	0.0879747	0.1519	0.0116143	5.22465
1975	MD01G1080200	4.97995	4.51386	3.57988	3.79304	3.4633
1976	MD01G1080400	0.469992	0.234838	0.347493	0.29834	0
1977	MD01G1080500	17.4548	6.56748	47.4659	1.08494	0.927725
1978	MD01G1080600	1.79066	2.01729	2.93723	2.68187	0.009792
1979	MD01G1080700	0	0	0.0101987	0.0813473	0
1980	MD01G1080800	3.50543	0.0251183	0.040586	0.010811	0.0201697
1981	MD01G1080900	0.835584	1.55238	2.1531	1.52561	2.9751
1982	MD01G1081200	10.9303	18.5503	10.5441	18.5881	7.36954
1983	MD01G1081300	3.37698	1.71709	4.07422	2.06367	1.88597
1984	MD01G1081700	0.00598367	0.0548397	0	0.14993	0
1985	MD01G1081900	0.005379	0	0.017683	0	0
1986	MD01G1082000	11.8213	14.7829	7.84846	10.6612	15.2423
1987	MD01G1082100	3.14135	2.30155	3.54744	2.90964	2.24414
1988	MD01G1082200	7.39351	69.4642	31.5583	18.664	0.138468
1989	MD01G1082300	17.0477	7.35925	8.80019	7.4144	9.43604
1990	MD01G1082400	0.029535	0	0	0	0
1991	MD01G1082500	2.65247	3.13099	3.24053	3.49952	2.33588
1992	MD01G1082600	1.16248	2.09132	1.20999	1.41887	0.0276057
1993	MD01G1082700	7.04488	2.12465	9.09618	2.47281	4.01885
1994	MD01G1083000	46.7912	10.448	36.6024	0.896781	0.177315
1995	MD01G1083100	10.5314	9.9601	6.78987	7.99206	11.8329
1996	MD01G1083200	0.098168	0.0907127	0.0685383	0.0688643	0.27381
1997	MD01G1083300	1.45638	9.00094	0.0737657	13.9151	160.059
1998	MD01G1083400	2.77162	16.4096	11.7919	19.8072	1.11103
[truncated: 44,772 more rows]
