# Supplementary material for: Expression Profiles and Characteristics of Apple lncRNAs in Roots, Phloem, Leaves, Flowers, and Fruit
Source: Int J Mol Sci. 2022 May 25;23(11):5931. doi: 10.3390/ijms23115931 (PMC9180697; doi:10.3390/ijms23115931)
Supplement: Supplementary file 1 [file ijms-23-05931-s001.zip › Table S6.xlsx]

## Sheet: Table S6-1
Table S6-1 List of lncRNAs expressed in all five tissues
No.	LncRNA_ID
1	MSTRG.100099.4
2	MSTRG.100183.1
3	MSTRG.100227.6
4	MSTRG.10024.2
5	MSTRG.10025.1
6	MSTRG.100293.1
7	MSTRG.100566.1
8	MSTRG.100662.3
9	MSTRG.100804.1
10	MSTRG.101038.1
11	MSTRG.101050.87
12	MSTRG.101059.1
13	MSTRG.101148.2
14	MSTRG.101190.1
15	MSTRG.101190.2
16	MSTRG.101298.2
17	MSTRG.10136.1
18	MSTRG.10137.1
19	MSTRG.101462.13
20	MSTRG.101544.5
21	MSTRG.101646.1
22	MSTRG.101664.2
23	MSTRG.10177.1
24	MSTRG.101782.1
25	MSTRG.10182.1
26	MSTRG.101852.1
27	MSTRG.101885.2
28	MSTRG.102049.8
29	MSTRG.102055.131
30	MSTRG.102055.133
31	MSTRG.102055.138
32	MSTRG.102055.139
33	MSTRG.102055.146
34	MSTRG.102055.227
35	MSTRG.102072.4
36	MSTRG.102072.5
37	MSTRG.102080.1
38	MSTRG.102172.1
39	MSTRG.102223.1
40	MSTRG.102246.1
41	MSTRG.102439.10
42	MSTRG.102439.11
43	MSTRG.102542.23
44	MSTRG.102542.24
45	MSTRG.10262.1
46	MSTRG.10268.1
47	MSTRG.10280.1
48	MSTRG.10296.1
49	MSTRG.103065.1
50	MSTRG.103139.1
51	MSTRG.103191.1
52	MSTRG.103191.2
53	MSTRG.103191.4
54	MSTRG.103193.1
55	MSTRG.103193.3
56	MSTRG.103253.12
57	MSTRG.103253.14
58	MSTRG.103253.6
59	MSTRG.103506.1
60	MSTRG.103506.3
61	MSTRG.103511.1
62	MSTRG.103636.1
63	MSTRG.10365.1
64	MSTRG.103783.2
65	MSTRG.103783.3
66	MSTRG.103867.1
67	MSTRG.103867.3
68	MSTRG.104180.1
69	MSTRG.104381.13
70	MSTRG.104381.14
71	MSTRG.104381.16
72	MSTRG.104381.17
73	MSTRG.104381.19
74	MSTRG.104381.21
75	MSTRG.104381.22
76	MSTRG.104381.23
77	MSTRG.104381.29
78	MSTRG.104381.39
79	MSTRG.104381.4
80	MSTRG.104381.41
81	MSTRG.104381.44
82	MSTRG.104381.45
83	MSTRG.104381.48
84	MSTRG.104381.51
85	MSTRG.104381.7
86	MSTRG.104665.1
87	MSTRG.104711.1
88	MSTRG.104711.12
89	MSTRG.104711.19
90	MSTRG.104711.23
91	MSTRG.104711.4
92	MSTRG.104711.5
93	MSTRG.104711.6
94	MSTRG.104711.7
95	MSTRG.104792.1
96	MSTRG.104820.1
97	MSTRG.10484.2
98	MSTRG.104967.2
99	MSTRG.10503.7
100	MSTRG.10519.1
101	MSTRG.105194.1
102	MSTRG.105569.1
103	MSTRG.105628.14
104	MSTRG.105634.1
105	MSTRG.105758.2
106	MSTRG.105999.18
107	MSTRG.106047.15
108	MSTRG.10605.2
109	MSTRG.10605.3
110	MSTRG.106053.3
111	MSTRG.106174.2
112	MSTRG.106277.1
113	MSTRG.106286.1
114	MSTRG.1063.8
115	MSTRG.10630.8
116	MSTRG.10630.9
117	MSTRG.106374.12
118	MSTRG.106374.14
119	MSTRG.106502.1
120	MSTRG.106576.1
121	MSTRG.106582.1
122	MSTRG.106706.1
123	MSTRG.106821.1
124	MSTRG.106938.1
125	MSTRG.10722.1
126	MSTRG.10722.11
127	MSTRG.10722.2
128	MSTRG.10722.25
129	MSTRG.10722.32
130	MSTRG.10722.8
131	MSTRG.107224.1
132	MSTRG.107381.12
133	MSTRG.107496.5
134	MSTRG.107631.1
135	MSTRG.107655.1
136	MSTRG.107868.1
137	MSTRG.107948.1
138	MSTRG.107964.1
139	MSTRG.107966.1
140	MSTRG.108083.7
141	MSTRG.108119.1
142	MSTRG.108119.2
143	MSTRG.108127.1
144	MSTRG.108301.1
145	MSTRG.10845.1
146	MSTRG.108493.1
147	MSTRG.108628.1
148	MSTRG.108629.1
149	MSTRG.108631.1
150	MSTRG.108688.1
151	MSTRG.108834.3
152	MSTRG.108898.2
153	MSTRG.109014.1
154	MSTRG.109036.1
155	MSTRG.109081.5
156	MSTRG.109096.15
157	MSTRG.109153.1
158	MSTRG.109203.2
159	MSTRG.109204.1
160	MSTRG.109213.49
161	MSTRG.109214.1
162	MSTRG.109216.1
163	MSTRG.109220.1
164	MSTRG.109464.1
165	MSTRG.109464.2
166	MSTRG.109464.3
167	MSTRG.109487.2
168	MSTRG.109497.1
169	MSTRG.109568.2
170	MSTRG.109638.1
171	MSTRG.109638.17
172	MSTRG.109638.20
173	MSTRG.109638.24
174	MSTRG.109809.1
175	MSTRG.110055.3
176	MSTRG.110055.6
177	MSTRG.110072.1
178	MSTRG.110092.1
179	MSTRG.110144.6
180	MSTRG.110144.7
181	MSTRG.110144.8
182	MSTRG.110145.1
183	MSTRG.110145.2
184	MSTRG.110207.12
185	MSTRG.110225.1
186	MSTRG.110261.3
187	MSTRG.110261.6
188	MSTRG.110322.1
189	MSTRG.110405.1
190	MSTRG.110405.2
191	MSTRG.110405.3
192	MSTRG.110423.11
193	MSTRG.110423.12
194	MSTRG.110423.14
195	MSTRG.110423.16
196	MSTRG.110423.19
197	MSTRG.110423.20
198	MSTRG.110423.21
199	MSTRG.110423.22
200	MSTRG.110437.2
201	MSTRG.110634.1
202	MSTRG.110696.4
203	MSTRG.110697.1
204	MSTRG.110767.1
205	MSTRG.110857.1
206	MSTRG.110915.2
207	MSTRG.110915.3
208	MSTRG.110915.4
209	MSTRG.111078.2
210	MSTRG.111591.2
211	MSTRG.111727.1
212	MSTRG.111792.1
213	MSTRG.111853.2
214	MSTRG.111951.1
215	MSTRG.112050.2
216	MSTRG.112050.3
217	MSTRG.112051.1
218	MSTRG.112150.1
219	MSTRG.112162.1
220	MSTRG.112238.1
221	MSTRG.112342.1
222	MSTRG.112419.1
223	MSTRG.112692.1
224	MSTRG.112715.1
225	MSTRG.112715.4
226	MSTRG.112785.1
227	MSTRG.112882.1
228	MSTRG.112985.1
229	MSTRG.113041.1
230	MSTRG.113041.12
231	MSTRG.113041.2
232	MSTRG.113041.3
233	MSTRG.113041.6
234	MSTRG.113041.7
235	MSTRG.113041.8
236	MSTRG.113041.9
237	MSTRG.113118.1
238	MSTRG.113127.3
239	MSTRG.113132.1
240	MSTRG.113134.4
241	MSTRG.11331.1
242	MSTRG.11332.1
243	MSTRG.113322.1
244	MSTRG.113400.1
245	MSTRG.113400.15
246	MSTRG.113400.16
247	MSTRG.113400.18
248	MSTRG.113400.2
249	MSTRG.113400.5
250	MSTRG.113400.9
251	MSTRG.113635.1
252	MSTRG.113683.2
253	MSTRG.113825.1
254	MSTRG.113884.1
255	MSTRG.114018.2
256	MSTRG.114101.2
257	MSTRG.114169.12
258	MSTRG.114342.1
259	MSTRG.114360.1
260	MSTRG.114420.1
261	MSTRG.114420.2
262	MSTRG.114420.5
263	MSTRG.114420.6
264	MSTRG.114440.1
265	MSTRG.114714.29
266	MSTRG.11486.1
267	MSTRG.114891.1
268	MSTRG.114894.3
269	MSTRG.115027.4
270	MSTRG.11513.5
271	MSTRG.11520.2
272	MSTRG.11521.1
273	MSTRG.11522.1
274	MSTRG.115247.30
275	MSTRG.115272.10
276	MSTRG.115272.7
277	MSTRG.115302.1
278	MSTRG.115306.2
279	MSTRG.115480.1
280	MSTRG.115793.1
281	MSTRG.115876.4
282	MSTRG.115876.8
283	MSTRG.115877.3
284	MSTRG.115913.1
285	MSTRG.115997.1
286	MSTRG.116192.1
287	MSTRG.116540.1
288	MSTRG.116743.1
289	MSTRG.116743.3
290	MSTRG.116743.7
291	MSTRG.116913.2
292	MSTRG.116987.1
293	MSTRG.11943.1
294	MSTRG.119488.2
295	MSTRG.119541.8
296	MSTRG.119556.1
297	MSTRG.119560.1
298	MSTRG.119800.4
299	MSTRG.119883.1
300	MSTRG.120089.8
301	MSTRG.120174.1
302	MSTRG.120231.1
303	MSTRG.12037.4
304	MSTRG.120454.1
305	MSTRG.120548.2
306	MSTRG.120721.1
307	MSTRG.120721.2
308	MSTRG.12075.1
309	MSTRG.120776.1
310	MSTRG.120783.3
311	MSTRG.120812.1
312	MSTRG.120812.2
313	MSTRG.120812.3
314	MSTRG.120813.1
315	MSTRG.121086.3
316	MSTRG.121086.4
317	MSTRG.121086.5
318	MSTRG.121086.6
319	MSTRG.121086.7
320	MSTRG.121148.1
321	MSTRG.121336.3
322	MSTRG.121641.28
323	MSTRG.121641.3
324	MSTRG.121644.1
325	MSTRG.121849.3
326	MSTRG.121968.1
327	MSTRG.121991.2
328	MSTRG.122016.1
329	MSTRG.12223.2
330	MSTRG.122286.1
331	MSTRG.122286.2
332	MSTRG.122286.3
333	MSTRG.122298.1
334	MSTRG.122315.1
335	MSTRG.122445.2
336	MSTRG.122497.21
337	MSTRG.122667.4
338	MSTRG.122697.15
339	MSTRG.122697.18
340	MSTRG.122697.20
341	MSTRG.122697.21
342	MSTRG.12276.1
343	MSTRG.122777.1
344	MSTRG.122923.1
345	MSTRG.123045.2
346	MSTRG.123083.24
347	MSTRG.123083.9
348	MSTRG.123191.3
349	MSTRG.123194.6
350	MSTRG.12333.4
351	MSTRG.123698.14
352	MSTRG.123698.15
353	MSTRG.123833.13
354	MSTRG.123833.14
355	MSTRG.123833.7
356	MSTRG.123837.6
357	MSTRG.123844.1
358	MSTRG.12387.1
359	MSTRG.123947.1
360	MSTRG.123985.1
361	MSTRG.12404.1
362	MSTRG.124087.2
363	MSTRG.12457.29
364	MSTRG.124584.1
365	MSTRG.12462.2
366	MSTRG.12464.1
367	MSTRG.12465.2
368	MSTRG.124671.1
369	MSTRG.124735.3
370	MSTRG.124738.1
371	MSTRG.124799.1
372	MSTRG.124843.1
373	MSTRG.124892.1
374	MSTRG.12497.18
375	MSTRG.1250.10
376	MSTRG.1250.14
377	MSTRG.125003.2
378	MSTRG.125041.1
379	MSTRG.125201.19
380	MSTRG.125224.1
381	MSTRG.125325.5
382	MSTRG.125349.1
383	MSTRG.125358.1
384	MSTRG.125376.1
385	MSTRG.12547.1
386	MSTRG.125473.1
387	MSTRG.125658.1
388	MSTRG.125660.1
389	MSTRG.125673.4
390	MSTRG.125673.5
391	MSTRG.125675.1
392	MSTRG.125678.1
393	MSTRG.125748.1
394	MSTRG.125880.7
395	MSTRG.125900.2
396	MSTRG.125921.1
397	MSTRG.125944.1
398	MSTRG.126184.1
399	MSTRG.126184.2
400	MSTRG.126255.1
401	MSTRG.126291.1
402	MSTRG.126319.1
403	MSTRG.126342.1
404	MSTRG.126428.1
405	MSTRG.126465.2
406	MSTRG.126509.2
407	MSTRG.126509.5
408	MSTRG.126509.6
409	MSTRG.126509.7
410	MSTRG.126509.9
411	MSTRG.126682.1
412	MSTRG.126767.22
413	MSTRG.126851.1
414	MSTRG.126877.11
415	MSTRG.126914.1
416	MSTRG.127000.1
417	MSTRG.127066.1
418	MSTRG.127123.1
419	MSTRG.127142.1
420	MSTRG.12725.1
421	MSTRG.127321.1
422	MSTRG.127322.3
423	MSTRG.127329.1
424	MSTRG.127452.1
425	MSTRG.127480.1
426	MSTRG.127560.3
427	MSTRG.127560.6
428	MSTRG.127643.3
429	MSTRG.127643.5
430	MSTRG.127671.1
431	MSTRG.127671.14
432	MSTRG.127690.7
433	MSTRG.127801.2
434	MSTRG.127808.1
435	MSTRG.127849.1
436	MSTRG.128025.4
437	MSTRG.128049.2
438	MSTRG.128084.2
439	MSTRG.128092.1
440	MSTRG.128108.1
441	MSTRG.128108.2
442	MSTRG.128108.6
443	MSTRG.128108.7
444	MSTRG.128379.1
445	MSTRG.128380.1
446	MSTRG.128381.1
447	MSTRG.128381.2
448	MSTRG.128577.1
449	MSTRG.128696.1
450	MSTRG.128787.8
451	MSTRG.128800.1
452	MSTRG.128862.3
453	MSTRG.128868.4
454	MSTRG.128895.2
455	MSTRG.128974.1
456	MSTRG.128985.2
457	MSTRG.128986.1
458	MSTRG.128986.2
459	MSTRG.129021.1
460	MSTRG.129108.1
461	MSTRG.129108.3
462	MSTRG.129108.4
463	MSTRG.129147.23
464	MSTRG.129153.3
465	MSTRG.129154.1
466	MSTRG.129154.2
467	MSTRG.129156.1
468	MSTRG.129205.1
469	MSTRG.129286.1
470	MSTRG.129330.1
471	MSTRG.129405.26
472	MSTRG.129414.2
473	MSTRG.129419.2
474	MSTRG.129453.1
475	MSTRG.129479.2
476	MSTRG.129479.3
477	MSTRG.129479.6
478	MSTRG.129582.1
479	MSTRG.129720.1
480	MSTRG.129720.2
481	MSTRG.129723.10
482	MSTRG.129723.11
483	MSTRG.129723.4
484	MSTRG.129723.5
485	MSTRG.129723.7
486	MSTRG.129723.9
487	MSTRG.129764.1
488	MSTRG.129868.1
489	MSTRG.129892.1
490	MSTRG.129919.1
491	MSTRG.130035.1
492	MSTRG.130037.1
493	MSTRG.130037.2
494	MSTRG.130037.5
495	MSTRG.130138.1
496	MSTRG.130241.1
497	MSTRG.130258.18
498	MSTRG.13052.1
499	MSTRG.130803.1
500	MSTRG.130803.2
501	MSTRG.13085.1
502	MSTRG.13100.2
503	MSTRG.131008.1
504	MSTRG.131008.8
505	MSTRG.131198.1
506	MSTRG.131464.1
507	MSTRG.131634.1
508	MSTRG.13176.1
509	MSTRG.131815.1
510	MSTRG.131854.1
511	MSTRG.13199.1
512	MSTRG.132050.10
513	MSTRG.132050.12
514	MSTRG.132050.2
515	MSTRG.132050.3
516	MSTRG.13211.2
517	MSTRG.132192.5
518	MSTRG.132216.1
519	MSTRG.132216.2
520	MSTRG.132283.1
521	MSTRG.132283.2
522	MSTRG.132283.3
523	MSTRG.132316.1
524	MSTRG.132356.12
525	MSTRG.132564.1
526	MSTRG.132653.1
527	MSTRG.132749.1
528	MSTRG.132764.3
529	MSTRG.132841.1
530	MSTRG.132841.2
531	MSTRG.133038.2
532	MSTRG.133050.3
533	MSTRG.133103.1
534	MSTRG.133103.2
535	MSTRG.133128.1
536	MSTRG.13313.1
537	MSTRG.133217.2
538	MSTRG.133217.3
539	MSTRG.133372.2
540	MSTRG.133572.1
541	MSTRG.133607.1
542	MSTRG.133639.1
543	MSTRG.133942.73
544	MSTRG.133942.76
545	MSTRG.133942.81
546	MSTRG.133953.1
547	MSTRG.133953.2
548	MSTRG.134000.2
549	MSTRG.134038.1
550	MSTRG.13404.2
551	MSTRG.13413.9
552	MSTRG.13420.5
553	MSTRG.134233.1
554	MSTRG.134251.1
555	MSTRG.134256.3
556	MSTRG.134258.1
557	MSTRG.134359.1
558	MSTRG.134391.1
559	MSTRG.134465.1
560	MSTRG.134502.1
561	MSTRG.134505.1
562	MSTRG.134534.4
563	MSTRG.134534.5
564	MSTRG.134536.1
565	MSTRG.134603.2
566	MSTRG.134622.1
567	MSTRG.134622.2
568	MSTRG.134713.11
569	MSTRG.134720.1
570	MSTRG.134720.2
571	MSTRG.134720.3
572	MSTRG.134720.7
573	MSTRG.134795.1
574	MSTRG.13488.3
575	MSTRG.135055.4
576	MSTRG.135058.1
577	MSTRG.13506.1
578	MSTRG.13506.2
579	MSTRG.135118.1
580	MSTRG.135119.1
581	MSTRG.135162.1
582	MSTRG.135166.1
583	MSTRG.13519.1
584	MSTRG.135190.1
585	MSTRG.135190.15
586	MSTRG.135190.16
587	MSTRG.135190.25
588	MSTRG.135190.29
589	MSTRG.135190.34
590	MSTRG.135672.1
591	MSTRG.135772.3
592	MSTRG.135828.1
593	MSTRG.136052.6
594	MSTRG.136058.1
595	MSTRG.136256.1
596	MSTRG.13643.1
597	MSTRG.13643.2
598	MSTRG.136692.1
599	MSTRG.136728.1
600	MSTRG.136757.1
601	MSTRG.136843.2
602	MSTRG.136937.1
603	MSTRG.137093.3
604	MSTRG.137093.4
605	MSTRG.137093.5
606	MSTRG.137093.6
607	MSTRG.137093.7
608	MSTRG.137206.1
609	MSTRG.137356.1
610	MSTRG.137356.11
611	MSTRG.137356.4
612	MSTRG.137356.5
613	MSTRG.137356.7
614	MSTRG.137592.1
615	MSTRG.137693.1
616	MSTRG.137780.1
617	MSTRG.137956.13
618	MSTRG.137956.14
619	MSTRG.137956.16
620	MSTRG.137956.21
621	MSTRG.137956.23
622	MSTRG.137956.24
623	MSTRG.137956.3
624	MSTRG.137956.5
625	MSTRG.137962.1
626	MSTRG.137962.2
627	MSTRG.137970.1
628	MSTRG.137993.1
629	MSTRG.138091.1
630	MSTRG.138092.1
631	MSTRG.138093.1
632	MSTRG.138093.3
633	MSTRG.138259.1
634	MSTRG.138385.2
635	MSTRG.13840.4
636	MSTRG.13846.1
637	MSTRG.138474.1
638	MSTRG.138476.1
639	MSTRG.138506.1
640	MSTRG.138572.1
641	MSTRG.138584.1
642	MSTRG.138698.1
643	MSTRG.138698.2
644	MSTRG.138884.2
645	MSTRG.138884.3
646	MSTRG.139135.16
647	MSTRG.139189.1
648	MSTRG.139274.16
649	MSTRG.139383.14
650	MSTRG.139414.1
651	MSTRG.139818.1
652	MSTRG.139861.1
653	MSTRG.139861.2
654	MSTRG.14003.1
655	MSTRG.140032.1
656	MSTRG.140032.2
657	MSTRG.14008.3
658	MSTRG.140107.1
659	MSTRG.140158.3
660	MSTRG.140288.3
661	MSTRG.140291.1
662	MSTRG.140291.13
663	MSTRG.140291.14
664	MSTRG.140291.2
665	MSTRG.140291.4
666	MSTRG.140512.3
667	MSTRG.140518.1
668	MSTRG.140533.1
669	MSTRG.140600.2
670	MSTRG.140604.2
671	MSTRG.140705.1
672	MSTRG.14071.57
673	MSTRG.140792.1
674	MSTRG.14082.1
675	MSTRG.140886.1
676	MSTRG.140886.5
677	MSTRG.14107.6
678	MSTRG.14107.9
679	MSTRG.141225.1
680	MSTRG.141252.1
681	MSTRG.141252.2
682	MSTRG.141252.3
683	MSTRG.141293.1
684	MSTRG.141293.2
685	MSTRG.141293.3
686	MSTRG.141293.4
687	MSTRG.141293.5
688	MSTRG.141314.29
689	MSTRG.141317.1
690	MSTRG.141384.1
691	MSTRG.141384.4
692	MSTRG.141697.1
693	MSTRG.141758.8
694	MSTRG.141759.1
695	MSTRG.141760.1
696	MSTRG.141761.1
697	MSTRG.141854.1
698	MSTRG.141904.1
699	MSTRG.141916.19
700	MSTRG.142016.1
701	MSTRG.142016.2
702	MSTRG.142102.1
703	MSTRG.142102.2
704	MSTRG.142102.3
705	MSTRG.142102.4
706	MSTRG.142102.5
707	MSTRG.142102.7
708	MSTRG.142192.2
709	MSTRG.142193.2
710	MSTRG.142400.2
711	MSTRG.142403.2
712	MSTRG.142440.1
713	MSTRG.142440.3
714	MSTRG.142453.3
715	MSTRG.142584.2
716	MSTRG.142651.1
717	MSTRG.142651.2
718	MSTRG.142651.3
719	MSTRG.142651.6
720	MSTRG.142845.1
721	MSTRG.142949.4
722	MSTRG.142951.1
723	MSTRG.143091.1
724	MSTRG.143154.1
725	MSTRG.143162.1
726	MSTRG.143162.2
727	MSTRG.143162.3
728	MSTRG.143264.2
729	MSTRG.143305.1
730	MSTRG.143489.3
731	MSTRG.143502.2
732	MSTRG.143687.1
733	MSTRG.143796.9
734	MSTRG.143937.1
735	MSTRG.143937.2
736	MSTRG.143937.3
737	MSTRG.143937.4
738	MSTRG.143937.5
739	MSTRG.143937.6
740	MSTRG.143988.1
741	MSTRG.144130.1
742	MSTRG.144175.2
743	MSTRG.144175.3
744	MSTRG.1443.1
745	MSTRG.1443.3
746	MSTRG.144385.2
747	MSTRG.144385.3
748	MSTRG.144462.1
749	MSTRG.144518.1
750	MSTRG.144551.1
751	MSTRG.144573.1
752	MSTRG.144588.1
753	MSTRG.144716.2
754	MSTRG.144762.1
755	MSTRG.144796.1
756	MSTRG.144873.1
757	MSTRG.144873.16
758	MSTRG.144873.17
759	MSTRG.144873.21
760	MSTRG.144873.3
761	MSTRG.144873.4
762	MSTRG.144873.5
763	MSTRG.144974.4
764	MSTRG.145038.1
765	MSTRG.145039.2
766	MSTRG.145044.2
767	MSTRG.145210.9
768	MSTRG.145325.1
769	MSTRG.145334.1
770	MSTRG.145439.2
771	MSTRG.145439.3
772	MSTRG.14544.1
773	MSTRG.145593.2
774	MSTRG.145731.1
775	MSTRG.145735.1
776	MSTRG.145755.1
777	MSTRG.145755.5
778	MSTRG.145852.1
779	MSTRG.145926.1
780	MSTRG.145999.3
781	MSTRG.146065.1
782	MSTRG.146176.2
783	MSTRG.146223.1
784	MSTRG.146318.5
785	MSTRG.146336.1
786	MSTRG.146376.15
787	MSTRG.146378.1
788	MSTRG.146433.3
789	MSTRG.146567.1
790	MSTRG.146567.3
791	MSTRG.146567.4
792	MSTRG.146581.1
793	MSTRG.146633.1
794	MSTRG.146648.1
795	MSTRG.14726.1
796	MSTRG.1474.1
797	MSTRG.14754.47
798	MSTRG.14761.2
799	MSTRG.14796.24
800	MSTRG.14796.25
801	MSTRG.14802.12
802	MSTRG.14805.1
803	MSTRG.14885.1
804	MSTRG.1496.1
805	MSTRG.14972.57
806	MSTRG.14972.61
807	MSTRG.1498.1
808	MSTRG.1498.5
809	MSTRG.14989.145
810	MSTRG.14989.146
811	MSTRG.14989.159
812	MSTRG.14989.161
813	MSTRG.14989.187
814	MSTRG.14989.202
815	MSTRG.14989.299
816	MSTRG.14989.352
817	MSTRG.14989.372
818	MSTRG.14989.50
819	MSTRG.14989.51
820	MSTRG.14989.55
821	MSTRG.14989.56
822	MSTRG.14990.1
823	MSTRG.14994.1
824	MSTRG.15001.2
825	MSTRG.15009.1
826	MSTRG.15086.1
827	MSTRG.15164.1
828	MSTRG.15169.1
829	MSTRG.15170.1
830	MSTRG.15216.26
831	MSTRG.15244.1
832	MSTRG.1526.34
833	MSTRG.1528.1
834	MSTRG.1530.1
835	MSTRG.15304.10
836	MSTRG.15304.11
837	MSTRG.15384.47
838	MSTRG.15384.48
839	MSTRG.15384.49
840	MSTRG.15384.50
841	MSTRG.15384.87
842	MSTRG.15454.1
843	MSTRG.15467.2
844	MSTRG.1564.22
845	MSTRG.1564.9
846	MSTRG.15641.1
847	MSTRG.15645.1
848	MSTRG.15657.2
849	MSTRG.15657.3
850	MSTRG.15657.4
851	MSTRG.15809.1
852	MSTRG.15844.1
853	MSTRG.15866.18
854	MSTRG.15899.10
855	MSTRG.15899.11
856	MSTRG.15899.12
857	MSTRG.15899.3
858	MSTRG.15899.4
859	MSTRG.15899.5
860	MSTRG.15899.6
861	MSTRG.15899.7
862	MSTRG.15899.8
863	MSTRG.15899.9
864	MSTRG.16012.27
865	MSTRG.16012.34
866	MSTRG.16052.3
867	MSTRG.16052.5
868	MSTRG.16054.1
869	MSTRG.16054.12
870	MSTRG.16062.1
871	MSTRG.16098.1
872	MSTRG.1615.1
873	MSTRG.1617.7
874	MSTRG.16269.1
875	MSTRG.16269.2
876	MSTRG.16279.28
877	MSTRG.16306.1
878	MSTRG.16307.1
879	MSTRG.16321.1
880	MSTRG.16435.2
881	MSTRG.16441.1
882	MSTRG.16502.1
883	MSTRG.16699.1
884	MSTRG.16719.1
885	MSTRG.16741.1
886	MSTRG.16813.1
887	MSTRG.16839.8
888	MSTRG.1691.1
889	MSTRG.1692.1
890	MSTRG.16933.1
891	MSTRG.16941.1
892	MSTRG.16995.1
893	MSTRG.17016.7
894	MSTRG.17016.8
895	MSTRG.17140.24
896	MSTRG.17165.2
897	MSTRG.17223.1
898	MSTRG.17223.3
899	MSTRG.17232.1
900	MSTRG.17352.1
901	MSTRG.17565.1
902	MSTRG.17640.1
903	MSTRG.17640.2
904	MSTRG.17712.1
905	MSTRG.17752.3
906	MSTRG.17955.1
907	MSTRG.18182.1
908	MSTRG.18310.1
909	MSTRG.18378.5
910	MSTRG.18378.8
911	MSTRG.18483.1
912	MSTRG.18600.1
913	MSTRG.18945.1
914	MSTRG.19050.1
915	MSTRG.19050.2
916	MSTRG.19050.3
917	MSTRG.19107.1
918	MSTRG.19140.2
919	MSTRG.19213.2
920	MSTRG.19310.11
921	MSTRG.19443.1
922	MSTRG.19491.1
923	MSTRG.19524.1
924	MSTRG.19628.1
925	MSTRG.19654.2
926	MSTRG.19687.7
927	MSTRG.19867.4
928	MSTRG.19868.13
929	MSTRG.19870.1
930	MSTRG.19872.1
931	MSTRG.19882.22
932	MSTRG.19886.20
933	MSTRG.19886.5
934	MSTRG.19888.4
935	MSTRG.19901.1
936	MSTRG.19902.15
937	MSTRG.19902.22
938	MSTRG.19902.5
939	MSTRG.19902.6
940	MSTRG.19904.1
941	MSTRG.19939.1
942	MSTRG.2010.1
943	MSTRG.20163.2
944	MSTRG.20185.1
945	MSTRG.20187.1
946	MSTRG.20190.1
947	MSTRG.20252.9
948	MSTRG.20260.1
949	MSTRG.20263.1
950	MSTRG.20265.26
951	MSTRG.20267.1
952	MSTRG.20268.1
953	MSTRG.20270.1
954	MSTRG.20276.1
955	MSTRG.20277.1
956	MSTRG.20278.1
957	MSTRG.20279.54
958	MSTRG.20279.96
959	MSTRG.20285.1
960	MSTRG.20287.2
961	MSTRG.20292.1
962	MSTRG.20292.3
963	MSTRG.20293.1
964	MSTRG.20298.1
965	MSTRG.20369.1
966	MSTRG.20409.1
967	MSTRG.20438.5
968	MSTRG.20503.1
969	MSTRG.20508.1
970	MSTRG.20509.10
971	MSTRG.20509.11
972	MSTRG.20509.12
973	MSTRG.20509.15
974	MSTRG.20509.2
975	MSTRG.20509.21
976	MSTRG.20509.8
977	MSTRG.20511.1
978	MSTRG.20521.1
979	MSTRG.20557.1
980	MSTRG.20611.2
981	MSTRG.20813.9
982	MSTRG.20820.1
983	MSTRG.20927.2
984	MSTRG.2102.1
985	MSTRG.21067.1
986	MSTRG.21147.1
987	MSTRG.21148.1
988	MSTRG.21189.1
989	MSTRG.21209.11
990	MSTRG.21209.18
991	MSTRG.21209.8
992	MSTRG.21232.1
993	MSTRG.21234.1
994	MSTRG.21294.2
995	MSTRG.21296.1
996	MSTRG.21373.5
997	MSTRG.21373.6
998	MSTRG.21461.1
999	MSTRG.2148.1
1000	MSTRG.21643.1
1001	MSTRG.2165.1
1002	MSTRG.21670.1
1003	MSTRG.21674.1
1004	MSTRG.21705.8
1005	MSTRG.21738.1
1006	MSTRG.21753.2
1007	MSTRG.21773.4
1008	MSTRG.21810.1
1009	MSTRG.21811.1
1010	MSTRG.21871.1
1011	MSTRG.21942.2
1012	MSTRG.21942.3
1013	MSTRG.21942.4
1014	MSTRG.21942.5
1015	MSTRG.21942.6
1016	MSTRG.22080.12
1017	MSTRG.22097.2
1018	MSTRG.22097.5
1019	MSTRG.22097.6
1020	MSTRG.22264.52
1021	MSTRG.22329.1
1022	MSTRG.22340.1
1023	MSTRG.22341.1
1024	MSTRG.22342.1
1025	MSTRG.22493.2
1026	MSTRG.22502.3
1027	MSTRG.22511.6
1028	MSTRG.22512.1
1029	MSTRG.22594.135
1030	MSTRG.22594.136
1031	MSTRG.22594.141
1032	MSTRG.22594.142
1033	MSTRG.22594.200
1034	MSTRG.22594.47
1035	MSTRG.22595.1
1036	MSTRG.22596.2
1037	MSTRG.22598.1
1038	MSTRG.22599.1
1039	MSTRG.22681.1
1040	MSTRG.22681.19
1041	MSTRG.22693.16
1042	MSTRG.22693.17
1043	MSTRG.22697.2
1044	MSTRG.22697.3
1045	MSTRG.22698.4
1046	MSTRG.22702.1
1047	MSTRG.22703.4
1048	MSTRG.22704.1
1049	MSTRG.22722.84
1050	MSTRG.22816.26
1051	MSTRG.22891.1
1052	MSTRG.22974.9
1053	MSTRG.22975.1
1054	MSTRG.22975.18
1055	MSTRG.22975.23
1056	MSTRG.22975.5
1057	MSTRG.22983.1
1058	MSTRG.23051.2
1059	MSTRG.2308.1
1060	MSTRG.23090.1
1061	MSTRG.23252.3
1062	MSTRG.23445.2
1063	MSTRG.23462.1
1064	MSTRG.23533.1
1065	MSTRG.23533.3
1066	MSTRG.23564.1
1067	MSTRG.23675.1
1068	MSTRG.23748.2
1069	MSTRG.23790.1
1070	MSTRG.23943.1
1071	MSTRG.23943.3
1072	MSTRG.2401.2
1073	MSTRG.24034.1
1074	MSTRG.24045.2
1075	MSTRG.24097.1
1076	MSTRG.24100.1
1077	MSTRG.24104.2
1078	MSTRG.24123.1
1079	MSTRG.24148.9
1080	MSTRG.24225.1
1081	MSTRG.24286.1
1082	MSTRG.24294.3
1083	MSTRG.24295.1
1084	MSTRG.24295.10
1085	MSTRG.24295.3
1086	MSTRG.24295.4
1087	MSTRG.24295.8
1088	MSTRG.24295.9
1089	MSTRG.24359.2
1090	MSTRG.24359.6
1091	MSTRG.24438.2
1092	MSTRG.24559.1
1093	MSTRG.24596.1
1094	MSTRG.24668.32
1095	MSTRG.24806.3
1096	MSTRG.24833.2
1097	MSTRG.24839.1
1098	MSTRG.249.1
1099	MSTRG.249.3
1100	MSTRG.24932.13
1101	MSTRG.24989.3
1102	MSTRG.25098.5
1103	MSTRG.25519.1
1104	MSTRG.2554.1
1105	MSTRG.2554.2
1106	MSTRG.2554.4
1107	MSTRG.25588.3
1108	MSTRG.25703.2
1109	MSTRG.25704.1
1110	MSTRG.25770.1
1111	MSTRG.25801.1
1112	MSTRG.2585.1
1113	MSTRG.2585.2
1114	MSTRG.259.1
1115	MSTRG.2596.1
1116	MSTRG.25968.1
1117	MSTRG.26106.1
1118	MSTRG.26317.1
1119	MSTRG.26510.82
1120	MSTRG.26723.1
1121	MSTRG.26776.8
1122	MSTRG.2678.1
1123	MSTRG.26892.56
1124	MSTRG.26892.84
1125	MSTRG.26920.1
1126	MSTRG.26921.2
1127	MSTRG.27007.1
1128	MSTRG.27007.2
1129	MSTRG.27007.6
1130	MSTRG.27007.7
1131	MSTRG.27164.4
1132	MSTRG.27164.6
1133	MSTRG.27164.8
1134	MSTRG.27164.9
1135	MSTRG.27171.6
1136	MSTRG.27212.2
1137	MSTRG.27288.1
1138	MSTRG.27434.1
1139	MSTRG.27586.1
1140	MSTRG.27713.1
1141	MSTRG.27886.9
1142	MSTRG.2801.1
1143	MSTRG.2810.1
1144	MSTRG.28154.1
1145	MSTRG.28180.1
1146	MSTRG.28195.1
1147	MSTRG.28195.11
1148	MSTRG.2821.1
1149	MSTRG.28293.1
1150	MSTRG.28307.1
1151	MSTRG.28588.1
1152	MSTRG.28616.1
1153	MSTRG.28838.1
1154	MSTRG.28864.1
1155	MSTRG.28865.1
1156	MSTRG.28890.2
1157	MSTRG.29033.1
1158	MSTRG.29033.2
1159	MSTRG.29050.2
1160	MSTRG.29057.2
1161	MSTRG.29096.5
1162	MSTRG.29252.1
1163	MSTRG.29319.1
1164	MSTRG.29390.10
1165	MSTRG.29390.11
1166	MSTRG.29390.6
1167	MSTRG.29411.6
1168	MSTRG.29469.1
1169	MSTRG.29511.52
1170	MSTRG.29571.5
1171	MSTRG.29578.9
1172	MSTRG.29582.1
1173	MSTRG.29582.2
1174	MSTRG.29582.5
1175	MSTRG.29666.1
1176	MSTRG.2987.1
1177	MSTRG.2987.2
1178	MSTRG.29886.1
1179	MSTRG.29886.2
1180	MSTRG.29886.3
1181	MSTRG.29886.4
1182	MSTRG.29886.5
1183	MSTRG.29886.6
1184	MSTRG.29886.8
1185	MSTRG.29923.1
1186	MSTRG.29923.2
1187	MSTRG.29923.5
1188	MSTRG.29923.7
1189	MSTRG.29923.8
1190	MSTRG.29925.1
1191	MSTRG.29929.1
1192	MSTRG.29938.1
1193	MSTRG.30065.1
1194	MSTRG.30148.1
1195	MSTRG.30200.1
1196	MSTRG.30202.1
1197	MSTRG.30321.4
1198	MSTRG.30321.6
1199	MSTRG.30380.2
1200	MSTRG.30381.1
1201	MSTRG.30432.1
1202	MSTRG.3047.4
1203	MSTRG.3049.3
1204	MSTRG.30564.1
1205	MSTRG.30723.1
1206	MSTRG.30723.2
1207	MSTRG.30795.1
1208	MSTRG.30924.1
1209	MSTRG.30924.2
1210	MSTRG.30924.4
1211	MSTRG.30924.6
1212	MSTRG.30924.7
1213	MSTRG.30987.1
1214	MSTRG.31214.3
1215	MSTRG.31230.1
1216	MSTRG.31230.10
1217	MSTRG.31230.11
1218	MSTRG.31230.3
1219	MSTRG.31230.7
1220	MSTRG.31230.8
1221	MSTRG.31231.3
1222	MSTRG.31282.3
1223	MSTRG.31282.8
1224	MSTRG.31293.1
1225	MSTRG.31293.4
1226	MSTRG.3142.1
1227	MSTRG.3142.4
1228	MSTRG.31443.1
1229	MSTRG.31492.1
1230	MSTRG.31571.1
1231	MSTRG.31605.3
1232	MSTRG.31729.1
1233	MSTRG.3181.16
1234	MSTRG.31871.11
1235	MSTRG.31954.1
1236	MSTRG.31955.5
1237	MSTRG.3198.4
1238	MSTRG.32061.1
1239	MSTRG.32213.14
1240	MSTRG.32266.1
1241	MSTRG.32330.1
1242	MSTRG.32472.1
1243	MSTRG.32506.4
1244	MSTRG.32511.1
1245	MSTRG.32552.1
1246	MSTRG.32552.2
1247	MSTRG.32552.4
1248	MSTRG.32552.5
1249	MSTRG.32552.6
1250	MSTRG.32772.1
1251	MSTRG.32773.2
1252	MSTRG.32848.6
1253	MSTRG.32875.1
1254	MSTRG.32907.1
1255	MSTRG.32974.1
1256	MSTRG.33212.10
1257	MSTRG.33212.12
1258	MSTRG.33280.1
1259	MSTRG.33282.1
1260	MSTRG.33326.1
1261	MSTRG.33331.10
1262	MSTRG.33331.11
1263	MSTRG.33331.12
1264	MSTRG.33331.13
1265	MSTRG.33331.14
1266	MSTRG.33331.6
1267	MSTRG.33331.7
1268	MSTRG.33331.8
1269	MSTRG.33628.9
1270	MSTRG.33721.1
1271	MSTRG.33814.28
1272	MSTRG.33814.30
1273	MSTRG.33814.31
1274	MSTRG.33814.34
1275	MSTRG.34332.1
1276	MSTRG.34660.1
1277	MSTRG.34660.2
1278	MSTRG.34669.1
1279	MSTRG.34685.35
1280	MSTRG.34692.2
1281	MSTRG.34692.4
1282	MSTRG.34701.1
1283	MSTRG.34704.1
1284	MSTRG.34708.1
1285	MSTRG.34736.10
1286	MSTRG.34736.13
1287	MSTRG.34736.14
1288	MSTRG.34736.15
1289	MSTRG.34736.16
1290	MSTRG.34736.17
1291	MSTRG.34736.18
1292	MSTRG.34736.19
1293	MSTRG.34736.5
1294	MSTRG.34736.7
1295	MSTRG.34737.1
1296	MSTRG.34924.1
1297	MSTRG.35007.1
1298	MSTRG.35074.1
1299	MSTRG.35074.2
1300	MSTRG.35074.3
1301	MSTRG.35075.1
1302	MSTRG.35075.2
1303	MSTRG.35075.3
1304	MSTRG.35086.10
1305	MSTRG.35086.7
1306	MSTRG.35240.1
1307	MSTRG.35457.1
1308	MSTRG.35457.2
1309	MSTRG.35457.4
1310	MSTRG.35457.5
1311	MSTRG.35457.8
1312	MSTRG.35542.6
1313	MSTRG.35765.1
1314	MSTRG.3580.1
1315	MSTRG.3600.1
1316	MSTRG.36066.1
1317	MSTRG.36245.2
1318	MSTRG.36439.5
1319	MSTRG.36634.4
1320	MSTRG.36827.1
1321	MSTRG.36854.2
1322	MSTRG.37003.1
1323	MSTRG.37126.1
1324	MSTRG.37189.5
1325	MSTRG.37298.3
1326	MSTRG.3731.1
1327	MSTRG.37421.2
1328	MSTRG.37457.2
1329	MSTRG.37457.4
1330	MSTRG.37457.6
1331	MSTRG.37467.1
1332	MSTRG.3778.1
1333	MSTRG.3783.1
1334	MSTRG.37925.1
1335	MSTRG.37965.1
1336	MSTRG.37965.16
1337	MSTRG.37965.24
1338	MSTRG.37965.28
1339	MSTRG.37965.35
1340	MSTRG.37965.37
1341	MSTRG.37965.5
1342	MSTRG.38084.1
1343	MSTRG.38091.1
1344	MSTRG.38097.1
1345	MSTRG.3812.1
1346	MSTRG.38141.1
1347	MSTRG.38183.2
1348	MSTRG.38448.8
1349	MSTRG.38738.2
1350	MSTRG.38739.1
1351	MSTRG.38739.2
1352	MSTRG.39006.1
1353	MSTRG.39020.4
1354	MSTRG.39106.1
1355	MSTRG.39135.1
1356	MSTRG.39168.1
1357	MSTRG.39300.1
1358	MSTRG.39300.2
1359	MSTRG.39300.3
1360	MSTRG.39301.22
1361	MSTRG.3941.4
1362	MSTRG.39418.2
1363	MSTRG.39511.1
1364	MSTRG.39716.1
1365	MSTRG.39759.1
1366	MSTRG.39773.1
1367	MSTRG.39773.2
1368	MSTRG.39773.3
1369	MSTRG.39792.1
1370	MSTRG.40225.1
1371	MSTRG.40225.2
1372	MSTRG.40268.1
1373	MSTRG.40268.4
1374	MSTRG.40289.1
1375	MSTRG.40381.1
1376	MSTRG.40384.1
1377	MSTRG.40401.1
1378	MSTRG.40403.16
1379	MSTRG.40447.10
1380	MSTRG.40447.11
1381	MSTRG.40447.14
1382	MSTRG.40447.16
1383	MSTRG.40447.2
1384	MSTRG.40447.24
1385	MSTRG.40447.4
1386	MSTRG.40447.8
1387	MSTRG.40470.1
1388	MSTRG.40485.1
1389	MSTRG.40511.1
1390	MSTRG.40546.2
1391	MSTRG.40659.1
1392	MSTRG.40699.1
1393	MSTRG.40703.1
1394	MSTRG.40732.1
1395	MSTRG.40742.1
1396	MSTRG.40764.1
1397	MSTRG.40940.1
1398	MSTRG.41050.46
1399	MSTRG.41053.1
1400	MSTRG.41054.1
1401	MSTRG.41114.1
1402	MSTRG.41115.1
1403	MSTRG.4119.1
1404	MSTRG.41353.2
1405	MSTRG.41360.1
1406	MSTRG.41365.8
1407	MSTRG.41365.9
1408	MSTRG.41382.2
1409	MSTRG.41429.1
1410	MSTRG.4145.8
1411	MSTRG.41476.1
1412	MSTRG.41478.2
1413	MSTRG.41478.3
1414	MSTRG.41485.3
1415	MSTRG.41493.2
1416	MSTRG.4153.26
1417	MSTRG.41552.132
1418	MSTRG.41552.92
1419	MSTRG.41555.2
1420	MSTRG.41566.117
1421	MSTRG.41566.3
1422	MSTRG.41569.1
1423	MSTRG.41580.14
1424	MSTRG.41580.19
1425	MSTRG.41580.5
1426	MSTRG.41588.1
1427	MSTRG.41596.1
1428	MSTRG.41634.1
1429	MSTRG.41635.1
1430	MSTRG.41686.13
1431	MSTRG.41720.1
1432	MSTRG.41738.1
1433	MSTRG.41749.1
1434	MSTRG.41811.1
1435	MSTRG.41812.1
1436	MSTRG.41835.1
1437	MSTRG.41986.1
1438	MSTRG.42254.1
1439	MSTRG.42293.1
1440	MSTRG.42293.2
1441	MSTRG.42502.3
1442	MSTRG.42583.2
1443	MSTRG.42591.1
1444	MSTRG.42594.12
1445	MSTRG.42597.1
1446	MSTRG.4263.2
1447	MSTRG.4263.3
1448	MSTRG.4263.4
1449	MSTRG.42776.4
1450	MSTRG.42808.1
1451	MSTRG.42902.36
1452	MSTRG.42902.43
1453	MSTRG.43005.1
1454	MSTRG.43191.1
1455	MSTRG.43208.1
1456	MSTRG.43208.2
1457	MSTRG.43534.1
1458	MSTRG.43543.1
1459	MSTRG.43544.13
1460	MSTRG.43544.4
1461	MSTRG.43554.1
1462	MSTRG.43554.2
1463	MSTRG.43559.1
1464	MSTRG.43594.1
1465	MSTRG.43681.1
1466	MSTRG.43777.1
1467	MSTRG.43778.3
1468	MSTRG.43797.1
1469	MSTRG.43798.1
1470	MSTRG.43798.2
1471	MSTRG.43798.3
1472	MSTRG.43798.4
1473	MSTRG.43798.5
1474	MSTRG.4381.1
1475	MSTRG.43817.1
1476	MSTRG.44312.1
1477	MSTRG.44377.4
1478	MSTRG.44385.10
1479	MSTRG.44388.1
1480	MSTRG.44388.2
1481	MSTRG.44404.1
1482	MSTRG.44439.1
1483	MSTRG.44450.1
1484	MSTRG.44537.1
1485	MSTRG.44537.26
1486	MSTRG.44537.27
1487	MSTRG.44582.2
1488	MSTRG.44610.40
1489	MSTRG.44610.46
1490	MSTRG.44682.31
1491	MSTRG.44682.36
1492	MSTRG.44682.38
1493	MSTRG.44682.39
1494	MSTRG.44682.4
1495	MSTRG.44682.40
1496	MSTRG.44682.8
1497	MSTRG.44682.9
1498	MSTRG.44714.1
1499	MSTRG.44757.3
1500	MSTRG.4479.1
1501	MSTRG.44873.1
1502	MSTRG.44978.2
1503	MSTRG.45052.10
1504	MSTRG.45052.3
1505	MSTRG.45052.7
1506	MSTRG.45148.1
1507	MSTRG.45228.1
1508	MSTRG.45256.1
1509	MSTRG.45264.1
1510	MSTRG.45698.1
1511	MSTRG.45773.82
1512	MSTRG.45950.1
1513	MSTRG.45973.7
1514	MSTRG.46010.8
1515	MSTRG.4603.1
1516	MSTRG.46121.2
1517	MSTRG.46237.1
1518	MSTRG.46302.22
1519	MSTRG.46305.3
1520	MSTRG.46345.2
1521	MSTRG.46654.1
1522	MSTRG.46772.2
1523	MSTRG.4683.1
1524	MSTRG.46887.4
1525	MSTRG.46896.1
1526	MSTRG.46917.1
1527	MSTRG.46998.1
1528	MSTRG.47021.1
1529	MSTRG.47034.1
1530	MSTRG.47035.1
1531	MSTRG.47163.4
1532	MSTRG.47181.1
1533	MSTRG.47293.3
1534	MSTRG.47298.12
1535	MSTRG.473.1
1536	MSTRG.47386.1
1537	MSTRG.47427.18
1538	MSTRG.47591.12
1539	MSTRG.47591.14
1540	MSTRG.47591.44
1541	MSTRG.47591.51
1542	MSTRG.47591.9
1543	MSTRG.4780.7
1544	MSTRG.47966.1
1545	MSTRG.47966.2
1546	MSTRG.47966.5
1547	MSTRG.47973.3
1548	MSTRG.48056.1
1549	MSTRG.48079.1
1550	MSTRG.48116.1
1551	MSTRG.48290.1
1552	MSTRG.48362.1
1553	MSTRG.48534.2
1554	MSTRG.4879.1
1555	MSTRG.4882.1
1556	MSTRG.48855.1
1557	MSTRG.48855.2
1558	MSTRG.48855.3
1559	MSTRG.48869.1
1560	MSTRG.49067.1
1561	MSTRG.49070.5
1562	MSTRG.49356.1
1563	MSTRG.49585.1
1564	MSTRG.49609.1
1565	MSTRG.49850.1
1566	MSTRG.49850.10
1567	MSTRG.49850.11
1568	MSTRG.49850.12
1569	MSTRG.49850.13
1570	MSTRG.49850.2
1571	MSTRG.49850.3
1572	MSTRG.49850.4
1573	MSTRG.49850.6
1574	MSTRG.49850.7
1575	MSTRG.49850.8
1576	MSTRG.4994.1
1577	MSTRG.49998.11
1578	MSTRG.49998.13
1579	MSTRG.49998.14
1580	MSTRG.49998.17
1581	MSTRG.49998.2
1582	MSTRG.49998.21
1583	MSTRG.49998.24
1584	MSTRG.49998.27
1585	MSTRG.49998.28
1586	MSTRG.49998.42
1587	MSTRG.49998.5
1588	MSTRG.49998.6
1589	MSTRG.49998.9
1590	MSTRG.50292.1
1591	MSTRG.50321.1
1592	MSTRG.50564.2
1593	MSTRG.50735.2
1594	MSTRG.50797.1
1595	MSTRG.5085.11
1596	MSTRG.5097.14
1597	MSTRG.5097.2
1598	MSTRG.5097.20
1599	MSTRG.5097.3
1600	MSTRG.5097.5
1601	MSTRG.51193.68
1602	MSTRG.5128.1
1603	MSTRG.5128.10
1604	MSTRG.5128.2
1605	MSTRG.5128.3
1606	MSTRG.5128.4
1607	MSTRG.5128.6
1608	MSTRG.5128.7
1609	MSTRG.5128.8
1610	MSTRG.51282.3
1611	MSTRG.51285.1
1612	MSTRG.51285.3
1613	MSTRG.51285.6
1614	MSTRG.51423.1
1615	MSTRG.51423.3
1616	MSTRG.51423.5
1617	MSTRG.51424.1
1618	MSTRG.51500.1
1619	MSTRG.51532.6
1620	MSTRG.51709.1
1621	MSTRG.51709.2
1622	MSTRG.51711.2
1623	MSTRG.51711.4
1624	MSTRG.51802.1
1625	MSTRG.51807.11
1626	MSTRG.51807.3
1627	MSTRG.5183.1
1628	MSTRG.52077.1
1629	MSTRG.52100.1
1630	MSTRG.52108.1
1631	MSTRG.52114.55
1632	MSTRG.5227.1
1633	MSTRG.52276.1
1634	MSTRG.52411.1
1635	MSTRG.528.1
1636	MSTRG.52809.1
1637	MSTRG.52934.4
1638	MSTRG.52956.1
1639	MSTRG.53411.1
1640	MSTRG.53411.2
1641	MSTRG.53427.2
1642	MSTRG.53583.1
1643	MSTRG.5391.1
1644	MSTRG.5391.2
1645	MSTRG.53956.1
1646	MSTRG.5397.57
1647	MSTRG.5398.1
1648	MSTRG.54056.1
1649	MSTRG.54064.1
1650	MSTRG.54084.14
1651	MSTRG.54084.6
1652	MSTRG.54084.7
1653	MSTRG.54088.2
1654	MSTRG.54093.1
1655	MSTRG.54135.1
1656	MSTRG.54135.2
1657	MSTRG.54135.4
1658	MSTRG.54143.19
1659	MSTRG.54173.1
1660	MSTRG.54195.2
1661	MSTRG.54248.6
1662	MSTRG.54473.1
1663	MSTRG.54476.2
1664	MSTRG.54697.1
1665	MSTRG.54765.1
1666	MSTRG.54803.1
1667	MSTRG.54803.2
1668	MSTRG.5482.1
1669	MSTRG.54877.121
1670	MSTRG.54877.71
1671	MSTRG.54880.1
1672	MSTRG.54883.1
1673	MSTRG.54885.1
1674	MSTRG.54918.1
1675	MSTRG.54918.2
1676	MSTRG.54918.3
1677	MSTRG.54918.4
1678	MSTRG.54938.1
1679	MSTRG.54970.2
1680	MSTRG.54996.1
1681	MSTRG.54996.4
1682	MSTRG.55001.1
1683	MSTRG.55038.1
1684	MSTRG.55038.2
1685	MSTRG.55094.1
1686	MSTRG.55148.29
1687	MSTRG.55148.32
1688	MSTRG.5521.4
1689	MSTRG.5521.5
1690	MSTRG.55273.1
1691	MSTRG.5530.1
1692	MSTRG.55308.1
1693	MSTRG.55381.1
1694	MSTRG.55382.1
1695	MSTRG.55468.3
1696	MSTRG.55509.2
1697	MSTRG.55536.1
1698	MSTRG.5563.3
1699	MSTRG.55733.7
1700	MSTRG.55747.1
1701	MSTRG.55747.2
1702	MSTRG.55791.10
1703	MSTRG.55833.1
1704	MSTRG.55835.1
1705	MSTRG.55835.13
1706	MSTRG.55835.16
1707	MSTRG.55835.17
1708	MSTRG.55835.2
1709	MSTRG.55835.4
1710	MSTRG.55916.2
1711	MSTRG.55962.1
1712	MSTRG.56074.2
1713	MSTRG.56076.6
1714	MSTRG.56111.1
1715	MSTRG.56129.12
1716	MSTRG.56129.23
1717	MSTRG.56129.30
1718	MSTRG.56129.33
1719	MSTRG.56129.41
1720	MSTRG.56129.48
1721	MSTRG.56157.1
1722	MSTRG.56157.2
1723	MSTRG.56183.1
1724	MSTRG.56185.1
1725	MSTRG.56206.5
1726	MSTRG.56241.1
1727	MSTRG.56241.11
1728	MSTRG.56241.2
1729	MSTRG.56241.3
1730	MSTRG.56241.5
1731	MSTRG.56241.6
1732	MSTRG.56241.7
1733	MSTRG.56289.4
1734	MSTRG.5633.5
1735	MSTRG.5635.9
1736	MSTRG.5636.1
1737	MSTRG.56450.15
1738	MSTRG.56450.3
1739	MSTRG.56450.7
1740	MSTRG.56554.2
1741	MSTRG.56554.3
1742	MSTRG.56556.1
1743	MSTRG.56587.3
1744	MSTRG.56587.4
1745	MSTRG.56716.11
1746	MSTRG.56716.12
1747	MSTRG.56716.13
1748	MSTRG.56716.14
1749	MSTRG.56716.18
1750	MSTRG.56716.20
1751	MSTRG.56716.22
1752	MSTRG.56716.23
1753	MSTRG.56769.1
1754	MSTRG.56880.1
1755	MSTRG.56880.2
1756	MSTRG.56880.3
1757	MSTRG.56981.1
1758	MSTRG.57154.1
1759	MSTRG.57298.1
1760	MSTRG.57298.3
1761	MSTRG.57379.1
1762	MSTRG.57390.4
1763	MSTRG.57455.19
1764	MSTRG.57477.14
1765	MSTRG.57550.6
1766	MSTRG.57581.1
1767	MSTRG.57585.3
1768	MSTRG.57598.1
1769	MSTRG.57659.1
1770	MSTRG.57916.3
1771	MSTRG.57978.1
1772	MSTRG.57978.2
1773	MSTRG.58149.1
1774	MSTRG.58179.1
1775	MSTRG.58179.2
1776	MSTRG.58200.52
1777	MSTRG.58333.1
1778	MSTRG.58353.2
1779	MSTRG.58436.1
1780	MSTRG.58501.1
1781	MSTRG.58721.3
1782	MSTRG.58721.5
1783	MSTRG.58723.7
1784	MSTRG.58726.9
1785	MSTRG.58857.14
1786	MSTRG.58857.15
1787	MSTRG.58857.16
1788	MSTRG.58857.17
1789	MSTRG.58857.18
1790	MSTRG.58857.8
1791	MSTRG.58857.9
1792	MSTRG.58953.1
1793	MSTRG.58956.1
1794	MSTRG.59002.3
1795	MSTRG.59035.1
1796	MSTRG.59035.2
1797	MSTRG.59035.3
1798	MSTRG.5904.1
1799	MSTRG.59047.47
1800	MSTRG.59121.1
1801	MSTRG.59121.2
1802	MSTRG.59123.1
1803	MSTRG.59200.3
1804	MSTRG.59648.2
1805	MSTRG.59663.1
1806	MSTRG.59663.2
1807	MSTRG.59664.1
1808	MSTRG.59667.3
1809	MSTRG.59740.3
1810	MSTRG.5997.5
1811	MSTRG.6001.1
1812	MSTRG.60015.1
1813	MSTRG.60015.2
1814	MSTRG.60016.1
1815	MSTRG.60186.2
1816	MSTRG.60209.355
1817	MSTRG.60216.1
1818	MSTRG.60220.1
1819	MSTRG.60221.1
1820	MSTRG.60221.2
1821	MSTRG.60222.1
1822	MSTRG.60250.17
1823	MSTRG.60259.1
1824	MSTRG.60259.2
1825	MSTRG.60350.1
1826	MSTRG.60384.2
1827	MSTRG.60466.1
1828	MSTRG.60478.1
1829	MSTRG.60550.1
1830	MSTRG.60550.2
1831	MSTRG.60832.1
1832	MSTRG.60900.26
1833	MSTRG.60900.27
1834	MSTRG.60918.2
1835	MSTRG.60974.1
1836	MSTRG.61031.3
1837	MSTRG.61340.1
1838	MSTRG.61340.2
1839	MSTRG.61340.3
1840	MSTRG.61623.10
1841	MSTRG.61623.9
1842	MSTRG.6163.1
1843	MSTRG.61685.1
1844	MSTRG.61812.1
1845	MSTRG.62132.1
1846	MSTRG.62148.4
1847	MSTRG.62161.1
1848	MSTRG.62173.1
1849	MSTRG.62285.1
1850	MSTRG.62294.1
1851	MSTRG.62327.95
1852	MSTRG.62331.1
1853	MSTRG.62565.3
1854	MSTRG.62632.2
1855	MSTRG.62635.1
1856	MSTRG.62636.1
1857	MSTRG.62636.2
1858	MSTRG.62924.2
1859	MSTRG.62950.1
1860	MSTRG.63098.1
1861	MSTRG.63210.1
1862	MSTRG.63229.1
1863	MSTRG.63229.2
1864	MSTRG.63230.1
1865	MSTRG.6343.2
1866	MSTRG.6346.1
1867	MSTRG.6346.2
1868	MSTRG.6352.1
1869	MSTRG.6353.2
1870	MSTRG.6371.1
1871	MSTRG.6371.2
1872	MSTRG.63750.17
1873	MSTRG.63821.1
1874	MSTRG.63889.13
1875	MSTRG.63889.31
1876	MSTRG.63889.46
1877	MSTRG.63889.59
1878	MSTRG.63889.65
1879	MSTRG.63897.1
1880	MSTRG.63900.3
1881	MSTRG.63900.4
1882	MSTRG.63900.5
1883	MSTRG.63900.9
1884	MSTRG.6394.2
1885	MSTRG.64076.1
1886	MSTRG.64078.1
1887	MSTRG.64079.4
1888	MSTRG.64080.1
1889	MSTRG.64080.2
1890	MSTRG.6410.1
1891	MSTRG.64137.1
1892	MSTRG.64137.2
1893	MSTRG.64325.1
1894	MSTRG.64419.1
1895	MSTRG.64470.2
1896	MSTRG.64559.1
1897	MSTRG.64559.12
1898	MSTRG.64559.13
1899	MSTRG.64559.14
1900	MSTRG.64559.2
1901	MSTRG.64559.3
1902	MSTRG.64559.4
1903	MSTRG.64559.5
1904	MSTRG.64559.6
1905	MSTRG.64559.7
1906	MSTRG.64559.8
1907	MSTRG.64680.1
1908	MSTRG.64769.2
1909	MSTRG.64944.1
1910	MSTRG.64947.1
1911	MSTRG.64953.6
1912	MSTRG.64984.1
1913	MSTRG.64990.4
1914	MSTRG.65032.2
1915	MSTRG.65032.6
1916	MSTRG.65064.1
1917	MSTRG.65064.2
1918	MSTRG.65064.3
1919	MSTRG.65064.4
1920	MSTRG.65145.1
1921	MSTRG.65158.1
1922	MSTRG.65163.1
1923	MSTRG.65255.1
1924	MSTRG.65382.2
1925	MSTRG.65385.1
1926	MSTRG.65440.1
1927	MSTRG.65526.1
1928	MSTRG.65595.10
1929	MSTRG.65595.11
1930	MSTRG.65595.25
1931	MSTRG.65595.29
1932	MSTRG.65595.4
1933	MSTRG.65602.1
1934	MSTRG.65728.1
1935	MSTRG.65842.1
1936	MSTRG.65842.5
1937	MSTRG.6590.1
1938	MSTRG.66028.1
1939	MSTRG.6638.9
1940	MSTRG.66521.6
1941	MSTRG.66551.1
1942	MSTRG.66553.41
1943	MSTRG.66564.1
1944	MSTRG.66581.2
1945	MSTRG.6676.1
1946	MSTRG.66774.1
1947	MSTRG.66815.1
1948	MSTRG.66815.4
1949	MSTRG.66998.1
1950	MSTRG.67010.1
1951	MSTRG.67028.1
1952	MSTRG.67029.1
1953	MSTRG.67049.1
1954	MSTRG.67049.2
1955	MSTRG.6710.1
1956	MSTRG.6732.1
1957	MSTRG.6732.10
1958	MSTRG.6732.15
1959	MSTRG.6732.16
1960	MSTRG.6732.17
1961	MSTRG.6732.19
1962	MSTRG.6732.2
1963	MSTRG.6732.3
1964	MSTRG.6732.7
1965	MSTRG.6732.8
1966	MSTRG.6737.1
1967	MSTRG.6737.2
1968	MSTRG.67446.34
1969	MSTRG.67566.1
1970	MSTRG.67592.17
1971	MSTRG.67597.70
1972	MSTRG.67597.71
1973	MSTRG.67655.5
1974	MSTRG.67727.9
1975	MSTRG.67780.2
1976	MSTRG.68106.5
1977	MSTRG.68106.6
1978	MSTRG.68278.1
1979	MSTRG.68316.2
1980	MSTRG.68337.5
1981	MSTRG.68357.3
1982	MSTRG.68357.5
1983	MSTRG.68373.1
1984	MSTRG.68373.3
1985	MSTRG.68373.8
1986	MSTRG.68397.1
1987	MSTRG.68450.1
1988	MSTRG.68498.1
1989	MSTRG.68501.1
1990	MSTRG.6880.9
1991	MSTRG.68823.1
1992	MSTRG.68904.1
1993	MSTRG.68935.1
1994	MSTRG.68960.1
1995	MSTRG.69055.1
1996	MSTRG.69055.2
1997	MSTRG.69309.2
1998	MSTRG.69317.6
[truncated: 678 more rows]

## Sheet: Table S6-2
Table S6-2 List of lncRNAs expressed in roots only
No.	LncRNA_ID
1	MSTRG.10149.1
2	MSTRG.101847.2
3	MSTRG.102059.1
4	MSTRG.102151.8
5	MSTRG.102292.5
6	MSTRG.102542.29
7	MSTRG.103194.1
8	MSTRG.103495.1
9	MSTRG.103702.1
10	MSTRG.10375.1
11	MSTRG.104651.1
12	MSTRG.105053.1
13	MSTRG.105243.1
14	MSTRG.105378.1
15	MSTRG.105519.2
16	MSTRG.105526.1
17	MSTRG.106316.2
18	MSTRG.107070.1
19	MSTRG.107507.1
20	MSTRG.107865.1
21	MSTRG.108064.1
22	MSTRG.108252.1
23	MSTRG.108319.1
24	MSTRG.108347.1
25	MSTRG.108908.1
26	MSTRG.109280.1
27	MSTRG.109421.3
28	MSTRG.109685.1
29	MSTRG.110054.1
30	MSTRG.110628.2
31	MSTRG.110704.1
32	MSTRG.112069.1
33	MSTRG.112351.1
34	MSTRG.112875.2
35	MSTRG.113127.5
36	MSTRG.113705.2
37	MSTRG.113879.4
38	MSTRG.113897.2
39	MSTRG.114916.2
40	MSTRG.114932.2
41	MSTRG.116035.1
42	MSTRG.119806.1
43	MSTRG.119998.1
44	MSTRG.120737.2
45	MSTRG.121644.5
46	MSTRG.121644.8
47	MSTRG.121849.4
48	MSTRG.122276.7
49	MSTRG.122585.2
50	MSTRG.122598.1
51	MSTRG.123138.1
52	MSTRG.124190.1
53	MSTRG.124193.3
54	MSTRG.124373.2
55	MSTRG.125325.8
56	MSTRG.125880.8
57	MSTRG.126232.1
58	MSTRG.126337.1
59	MSTRG.127196.1
60	MSTRG.127455.1
61	MSTRG.127953.1
62	MSTRG.128667.1
63	MSTRG.128667.2
64	MSTRG.129277.2
65	MSTRG.129416.1
66	MSTRG.129618.1
67	MSTRG.129886.2
68	MSTRG.130764.1
69	MSTRG.131035.1
70	MSTRG.131447.2
71	MSTRG.131546.1
72	MSTRG.13166.1
73	MSTRG.131697.3
74	MSTRG.132049.1
75	MSTRG.134117.2
76	MSTRG.13501.2
77	MSTRG.135109.1
78	MSTRG.136245.1
79	MSTRG.137033.2
80	MSTRG.138747.1
81	MSTRG.13882.10
82	MSTRG.138992.1
83	MSTRG.141183.1
84	MSTRG.141259.2
85	MSTRG.14170.1
86	MSTRG.141761.4
87	MSTRG.142226.13
88	MSTRG.142400.1
89	MSTRG.142917.9
90	MSTRG.143557.1
91	MSTRG.143810.1
92	MSTRG.144191.3
93	MSTRG.144796.2
94	MSTRG.144865.1
95	MSTRG.145407.1
96	MSTRG.145505.2
97	MSTRG.145858.2
98	MSTRG.146054.5
99	MSTRG.146146.1
100	MSTRG.146146.2
101	MSTRG.146540.1
102	MSTRG.146556.1
103	MSTRG.16079.1
104	MSTRG.16839.6
105	MSTRG.17957.1
106	MSTRG.18874.1
107	MSTRG.19120.1
108	MSTRG.19190.2
109	MSTRG.19475.1
110	MSTRG.19895.1
111	MSTRG.19895.2
112	MSTRG.21181.1
113	MSTRG.21637.6
114	MSTRG.22269.1
115	MSTRG.22562.2
116	MSTRG.22594.205
117	MSTRG.22697.1
118	MSTRG.22698.3
119	MSTRG.23059.26
120	MSTRG.23082.1
121	MSTRG.23252.17
122	MSTRG.23445.4
123	MSTRG.24401.1
124	MSTRG.24423.9
125	MSTRG.24438.1
126	MSTRG.2481.1
127	MSTRG.25729.1
128	MSTRG.25821.1
129	MSTRG.26509.2
130	MSTRG.27289.1
131	MSTRG.27434.3
132	MSTRG.27460.1
133	MSTRG.27711.1
134	MSTRG.28101.2
135	MSTRG.28386.1
136	MSTRG.28387.1
137	MSTRG.28395.2
138	MSTRG.2929.2
139	MSTRG.29298.1
140	MSTRG.29390.19
141	MSTRG.29602.1
142	MSTRG.29661.1
143	MSTRG.30442.2
144	MSTRG.30676.29
145	MSTRG.30755.1
146	MSTRG.31633.1
147	MSTRG.3185.1
148	MSTRG.32028.1
149	MSTRG.32653.1
150	MSTRG.32771.1
151	MSTRG.32834.3
152	MSTRG.32933.2
153	MSTRG.33209.1
154	MSTRG.33814.29
155	MSTRG.33846.1
156	MSTRG.3421.1
157	MSTRG.34275.2
158	MSTRG.34686.16
159	MSTRG.34686.7
160	MSTRG.34691.3
161	MSTRG.34710.1
162	MSTRG.34710.2
163	MSTRG.34710.3
164	MSTRG.34710.5
165	MSTRG.34713.1
166	MSTRG.34904.1
167	MSTRG.34905.1
168	MSTRG.37476.1
169	MSTRG.37836.7
170	MSTRG.37883.1
171	MSTRG.38075.1
172	MSTRG.38232.1
173	MSTRG.39070.1
174	MSTRG.39084.2
175	MSTRG.39285.2
176	MSTRG.3953.2
177	MSTRG.39897.1
178	MSTRG.4020.3
179	MSTRG.40305.2
180	MSTRG.40447.23
181	MSTRG.40447.25
182	MSTRG.40607.1
183	MSTRG.40644.1
184	MSTRG.41293.1
185	MSTRG.41851.1
186	MSTRG.42290.1
187	MSTRG.43130.1
188	MSTRG.43313.1
189	MSTRG.43544.7
190	MSTRG.44022.6
191	MSTRG.44537.28
192	MSTRG.44664.1
193	MSTRG.45393.1
194	MSTRG.45420.5
195	MSTRG.45601.1
196	MSTRG.45628.3
197	MSTRG.45628.4
198	MSTRG.45983.2
199	MSTRG.46302.11
200	MSTRG.46314.1
201	MSTRG.46433.2
202	MSTRG.46872.1
203	MSTRG.48545.1
204	MSTRG.49566.2
205	MSTRG.49566.3
206	MSTRG.49806.2
207	MSTRG.49998.30
208	MSTRG.50098.1
209	MSTRG.5097.17
210	MSTRG.51819.1
211	MSTRG.51976.2
212	MSTRG.53154.2
213	MSTRG.53203.2
214	MSTRG.54120.1
215	MSTRG.54135.3
216	MSTRG.54378.1
217	MSTRG.5479.5
218	MSTRG.54996.2
219	MSTRG.55556.1
220	MSTRG.55791.4
221	MSTRG.55791.9
222	MSTRG.57110.1
223	MSTRG.57217.1
224	MSTRG.57477.4
225	MSTRG.57560.1
226	MSTRG.57586.1
227	MSTRG.57676.2
228	MSTRG.57707.1
229	MSTRG.5790.1
230	MSTRG.59009.2
231	MSTRG.59181.1
232	MSTRG.59350.2
233	MSTRG.6001.2
234	MSTRG.60015.3
235	MSTRG.6005.1
236	MSTRG.60092.2
237	MSTRG.61361.1
238	MSTRG.61364.2
239	MSTRG.61364.3
240	MSTRG.6166.1
241	MSTRG.62148.10
242	MSTRG.62148.5
243	MSTRG.6290.1
244	MSTRG.63000.1
245	MSTRG.63000.2
246	MSTRG.63448.2
247	MSTRG.64407.1
248	MSTRG.64460.2
249	MSTRG.64627.3
250	MSTRG.65026.2
251	MSTRG.65377.2
252	MSTRG.6567.1
253	MSTRG.65695.1
254	MSTRG.65842.9
255	MSTRG.66029.5
256	MSTRG.66680.2
257	MSTRG.66733.1
258	MSTRG.67046.4
259	MSTRG.6732.20
260	MSTRG.68495.1
261	MSTRG.69932.1
262	MSTRG.69965.1
263	MSTRG.70030.1
264	MSTRG.7161.2
265	MSTRG.71682.3
266	MSTRG.72738.1
267	MSTRG.73274.1
268	MSTRG.74192.7
269	MSTRG.74592.1
270	MSTRG.74819.2
271	MSTRG.75143.8
272	MSTRG.75338.3
273	MSTRG.75416.1
274	MSTRG.76048.8
275	MSTRG.76395.6
276	MSTRG.76486.1
277	MSTRG.77605.3
278	MSTRG.77605.7
279	MSTRG.79238.2
280	MSTRG.796.3
281	MSTRG.79747.1
282	MSTRG.79780.1
283	MSTRG.79918.3
284	MSTRG.80692.2
285	MSTRG.81022.2
286	MSTRG.81271.3
287	MSTRG.81856.5
288	MSTRG.81868.7
289	MSTRG.82117.7
290	MSTRG.82231.1
291	MSTRG.8229.1
292	MSTRG.82687.1
293	MSTRG.83352.1
294	MSTRG.8372.1
295	MSTRG.84181.2
296	MSTRG.84696.2
297	MSTRG.84989.1
298	MSTRG.84995.1
299	MSTRG.85027.1
300	MSTRG.85270.1
301	MSTRG.85484.28
302	MSTRG.85608.1
303	MSTRG.85659.1
304	MSTRG.8591.1
305	MSTRG.8638.1
306	MSTRG.8638.2
307	MSTRG.8638.3
308	MSTRG.8638.4
309	MSTRG.8648.2
310	MSTRG.86524.1
311	MSTRG.86573.2
312	MSTRG.86593.1
313	MSTRG.86700.8
314	MSTRG.8700.5
315	MSTRG.8700.7
316	MSTRG.87792.1
317	MSTRG.88151.2
318	MSTRG.88686.4
319	MSTRG.89149.1
320	MSTRG.90648.1
321	MSTRG.90895.1
322	MSTRG.91245.1
323	MSTRG.91673.18
324	MSTRG.91894.1
325	MSTRG.91900.3
326	MSTRG.91900.4
327	MSTRG.92221.2
328	MSTRG.92449.1
329	MSTRG.93014.1
330	MSTRG.93918.1
331	MSTRG.94002.5
332	MSTRG.94091.2
333	MSTRG.94810.1
334	MSTRG.95609.1
335	MSTRG.95811.1
336	MSTRG.96069.3
337	MSTRG.96157.3
338	MSTRG.96157.5
339	MSTRG.96404.1
340	MSTRG.97313.7
341	MSTRG.98129.3
342	MSTRG.9870.2
343	MSTRG.9870.3
344	MSTRG.9910.2
345	MSTRG.99188.3
346	MSTRG.99323.1

## Sheet: Table S6-3
Table S6-3 List of lncRNAs expressed in phloem only
No.	LncRNA_ID
1	MSTRG.100010.1
2	MSTRG.10046.3
3	MSTRG.100873.1
4	MSTRG.10137.9
5	MSTRG.101586.1
6	MSTRG.101727.1
7	MSTRG.102060.1
8	MSTRG.102366.2
9	MSTRG.102833.1
10	MSTRG.103008.1
11	MSTRG.103371.1
12	MSTRG.104099.1
13	MSTRG.104782.1
14	MSTRG.104943.2
15	MSTRG.104943.5
16	MSTRG.10495.1
17	MSTRG.105454.2
18	MSTRG.105500.2
19	MSTRG.105558.2
20	MSTRG.105680.1
21	MSTRG.105680.2
22	MSTRG.106099.1
23	MSTRG.106386.2
24	MSTRG.106386.3
25	MSTRG.106997.2
26	MSTRG.10722.22
27	MSTRG.10722.31
28	MSTRG.107246.1
29	MSTRG.109464.6
30	MSTRG.109616.10
31	MSTRG.109616.3
32	MSTRG.109616.7
33	MSTRG.109616.8
34	MSTRG.109738.1
35	MSTRG.10984.1
36	MSTRG.110067.1
37	MSTRG.110110.1
38	MSTRG.110408.2
39	MSTRG.110848.4
40	MSTRG.110894.1
41	MSTRG.111043.1
42	MSTRG.112034.1
43	MSTRG.112172.2
44	MSTRG.113127.6
45	MSTRG.113341.1
46	MSTRG.113350.1
47	MSTRG.113598.1
48	MSTRG.113725.3
49	MSTRG.113859.1
50	MSTRG.113873.1
51	MSTRG.113910.2
52	MSTRG.114708.1
53	MSTRG.115877.5
54	MSTRG.116895.2
55	MSTRG.119454.7
56	MSTRG.119516.2
57	MSTRG.119865.1
58	MSTRG.120483.2
59	MSTRG.121038.1
60	MSTRG.122972.1
61	MSTRG.123083.17
62	MSTRG.123969.1
63	MSTRG.124708.2
64	MSTRG.125556.4
65	MSTRG.125647.2
66	MSTRG.125897.1
67	MSTRG.126166.3
68	MSTRG.126263.1
69	MSTRG.126614.17
70	MSTRG.127090.1
71	MSTRG.127130.1
72	MSTRG.127341.1
73	MSTRG.127378.9
74	MSTRG.127872.2
75	MSTRG.128252.1
76	MSTRG.128665.1
77	MSTRG.128829.1
78	MSTRG.128917.2
79	MSTRG.129022.1
80	MSTRG.129090.9
81	MSTRG.12920.1
82	MSTRG.129385.1
83	MSTRG.129394.2
84	MSTRG.131124.9
85	MSTRG.131759.3
86	MSTRG.132465.20
87	MSTRG.13248.1
88	MSTRG.132748.3
89	MSTRG.132848.1
90	MSTRG.133371.2
91	MSTRG.133465.3
92	MSTRG.134321.3
93	MSTRG.134515.1
94	MSTRG.13464.1
95	MSTRG.134702.3
96	MSTRG.135097.1
97	MSTRG.135107.2
98	MSTRG.135107.5
99	MSTRG.135236.1
100	MSTRG.135410.1
101	MSTRG.135430.3
102	MSTRG.135662.4
103	MSTRG.135671.1
104	MSTRG.135859.1
105	MSTRG.135957.2
106	MSTRG.136150.1
107	MSTRG.136184.1
108	MSTRG.136185.1
109	MSTRG.136336.2
110	MSTRG.136336.3
111	MSTRG.136337.1
112	MSTRG.136672.1
113	MSTRG.136695.1
114	MSTRG.137674.35
115	MSTRG.137801.5
116	MSTRG.137822.1
117	MSTRG.137946.1
118	MSTRG.138661.23
119	MSTRG.139246.6
120	MSTRG.139590.3
121	MSTRG.139636.2
122	MSTRG.140286.1
123	MSTRG.140512.2
124	MSTRG.140626.1
125	MSTRG.140643.4
126	MSTRG.140967.1
127	MSTRG.141049.4
128	MSTRG.14107.7
129	MSTRG.141135.1
130	MSTRG.141232.13
131	MSTRG.141659.3
132	MSTRG.141811.7
133	MSTRG.141820.1
134	MSTRG.141980.1
135	MSTRG.142651.9
136	MSTRG.142754.1
137	MSTRG.143136.1
138	MSTRG.143146.1
139	MSTRG.143562.1
140	MSTRG.144165.28
141	MSTRG.144191.2
142	MSTRG.144318.1
143	MSTRG.144385.10
144	MSTRG.144861.3
145	MSTRG.144861.4
146	MSTRG.145819.1
147	MSTRG.146307.3
148	MSTRG.14972.43
149	MSTRG.15405.3
150	MSTRG.15469.1
151	MSTRG.15469.3
152	MSTRG.15674.1
153	MSTRG.1615.2
154	MSTRG.16839.7
155	MSTRG.16951.2
156	MSTRG.17748.1
157	MSTRG.18077.1
158	MSTRG.18680.1
159	MSTRG.18720.1
160	MSTRG.18975.1
161	MSTRG.19316.1
162	MSTRG.19985.1
163	MSTRG.20083.1
164	MSTRG.20273.2
165	MSTRG.20311.6
166	MSTRG.20482.2
167	MSTRG.20579.1
168	MSTRG.20772.1
169	MSTRG.2142.1
170	MSTRG.21459.2
171	MSTRG.21755.2
172	MSTRG.21809.1
173	MSTRG.22023.1
174	MSTRG.22698.5
175	MSTRG.23158.3
176	MSTRG.23189.1
177	MSTRG.23207.1
178	MSTRG.23252.19
179	MSTRG.23445.5
180	MSTRG.23694.1
181	MSTRG.2374.1
182	MSTRG.23936.1
183	MSTRG.24097.3
184	MSTRG.2492.2
185	MSTRG.24999.2
186	MSTRG.24999.3
187	MSTRG.25363.1
188	MSTRG.25386.2
189	MSTRG.25436.1
190	MSTRG.26056.2
191	MSTRG.26107.2
192	MSTRG.26107.5
193	MSTRG.26317.6
194	MSTRG.26328.2
195	MSTRG.26763.1
196	MSTRG.26914.7
197	MSTRG.27253.1
198	MSTRG.2740.1
199	MSTRG.27453.2
200	MSTRG.2753.2
201	MSTRG.27712.3
202	MSTRG.27742.1
203	MSTRG.27775.1
204	MSTRG.2809.4
205	MSTRG.2830.1
206	MSTRG.28308.1
207	MSTRG.28395.4
208	MSTRG.28426.2
209	MSTRG.28507.1
210	MSTRG.28579.1
211	MSTRG.28766.2
212	MSTRG.28908.5
213	MSTRG.29805.1
214	MSTRG.29923.15
215	MSTRG.29923.16
216	MSTRG.30323.1
217	MSTRG.31205.3
218	MSTRG.31206.1
219	MSTRG.3126.1
220	MSTRG.31453.1
221	MSTRG.3181.20
222	MSTRG.32407.1
223	MSTRG.32475.5
224	MSTRG.32621.1
225	MSTRG.32749.1
226	MSTRG.33039.1
227	MSTRG.33455.1
228	MSTRG.33456.1
229	MSTRG.33602.1
230	MSTRG.34193.2
231	MSTRG.34273.1
232	MSTRG.34321.1
233	MSTRG.34660.6
234	MSTRG.35169.2
235	MSTRG.35437.5
236	MSTRG.3748.2
237	MSTRG.3750.1
238	MSTRG.37832.1
239	MSTRG.38012.1
240	MSTRG.38064.1
241	MSTRG.38064.2
242	MSTRG.38338.1
243	MSTRG.39226.1
244	MSTRG.39361.1
245	MSTRG.39607.1
246	MSTRG.39847.1
247	MSTRG.4023.1
248	MSTRG.40426.1
249	MSTRG.40447.20
250	MSTRG.40736.2
251	MSTRG.40770.2
252	MSTRG.40770.3
253	MSTRG.4094.4
254	MSTRG.41144.1
255	MSTRG.41472.1
256	MSTRG.41631.2
257	MSTRG.41899.1
258	MSTRG.4219.3
259	MSTRG.42583.5
260	MSTRG.42584.1
261	MSTRG.42806.1
262	MSTRG.42913.1
263	MSTRG.4295.2
264	MSTRG.43102.1
265	MSTRG.43236.1
266	MSTRG.43480.1
267	MSTRG.43544.10
268	MSTRG.43544.11
269	MSTRG.43686.1
270	MSTRG.44022.3
271	MSTRG.44396.1
272	MSTRG.45781.1
273	MSTRG.45781.5
274	MSTRG.46457.1
275	MSTRG.46543.2
276	MSTRG.468.1
277	MSTRG.47175.1
278	MSTRG.47207.7
279	MSTRG.4727.1
280	MSTRG.47342.1
281	MSTRG.47577.1
282	MSTRG.4774.1
283	MSTRG.4780.20
284	MSTRG.47827.2
285	MSTRG.47921.2
286	MSTRG.48148.1
287	MSTRG.48367.1
288	MSTRG.48637.1
289	MSTRG.49091.1
290	MSTRG.49277.1
291	MSTRG.49298.1
292	MSTRG.49782.14
293	MSTRG.49801.3
294	MSTRG.49819.1
295	MSTRG.50040.1
296	MSTRG.50383.2
297	MSTRG.51066.2
298	MSTRG.51531.1
299	MSTRG.52222.1
300	MSTRG.53411.3
301	MSTRG.53943.2
302	MSTRG.54877.132
303	MSTRG.55150.1
304	MSTRG.55198.1
305	MSTRG.5521.7
306	MSTRG.55545.1
307	MSTRG.55748.1
308	MSTRG.55841.1
309	MSTRG.55900.1
310	MSTRG.56130.1
311	MSTRG.56206.23
312	MSTRG.56241.10
313	MSTRG.56278.1
314	MSTRG.56444.2
315	MSTRG.5674.3
316	MSTRG.57185.1
317	MSTRG.57860.1
318	MSTRG.57886.1
319	MSTRG.58026.2
320	MSTRG.58355.1
321	MSTRG.58726.3
322	MSTRG.59047.49
323	MSTRG.5910.1
324	MSTRG.59164.1
325	MSTRG.60017.1
326	MSTRG.60444.2
327	MSTRG.60902.1
328	MSTRG.61069.2
329	MSTRG.61358.1
330	MSTRG.62148.2
331	MSTRG.62660.1
332	MSTRG.62664.2
333	MSTRG.62696.8
334	MSTRG.63098.2
335	MSTRG.63202.1
336	MSTRG.63821.2
337	MSTRG.65118.1
338	MSTRG.65153.2
339	MSTRG.65751.2
340	MSTRG.65751.4
341	MSTRG.66149.1
342	MSTRG.66230.3
343	MSTRG.66640.2
344	MSTRG.66858.1
345	MSTRG.67034.1
346	MSTRG.67147.1
347	MSTRG.6732.18
348	MSTRG.67557.1
349	MSTRG.67559.1
350	MSTRG.67564.1
351	MSTRG.67900.1
352	MSTRG.67997.4
353	MSTRG.67997.5
354	MSTRG.68075.1
355	MSTRG.68196.2
356	MSTRG.68310.1
357	MSTRG.68373.7
358	MSTRG.68970.1
359	MSTRG.69490.4
360	MSTRG.69705.10
361	MSTRG.69705.11
362	MSTRG.69705.13
363	MSTRG.69705.14
364	MSTRG.69705.15
365	MSTRG.70.1
366	MSTRG.70579.2
367	MSTRG.70923.2
368	MSTRG.71037.1
369	MSTRG.71063.2
370	MSTRG.71191.1
371	MSTRG.71474.1
372	MSTRG.71613.1
373	MSTRG.71930.2
374	MSTRG.72135.2
375	MSTRG.72466.22
376	MSTRG.72720.4
377	MSTRG.7344.37
378	MSTRG.74338.1
379	MSTRG.7444.1
380	MSTRG.74551.3
381	MSTRG.74826.1
382	MSTRG.7501.2
383	MSTRG.75166.1
384	MSTRG.75372.1
385	MSTRG.75389.2
386	MSTRG.7550.3
387	MSTRG.76010.2
388	MSTRG.76048.5
389	MSTRG.7615.5
390	MSTRG.76186.5
391	MSTRG.76395.5
392	MSTRG.76397.1
393	MSTRG.7667.2
394	MSTRG.77041.6
395	MSTRG.77683.21
396	MSTRG.77745.1
397	MSTRG.77901.1
398	MSTRG.7830.2
399	MSTRG.78569.1
400	MSTRG.78594.1
401	MSTRG.78597.2
402	MSTRG.78664.1
403	MSTRG.78867.2
404	MSTRG.79146.2
405	MSTRG.79266.1
406	MSTRG.79267.2
407	MSTRG.79706.1
408	MSTRG.79796.1
409	MSTRG.79812.1
410	MSTRG.79817.1
411	MSTRG.79841.2
412	MSTRG.80083.1
413	MSTRG.8045.3
414	MSTRG.80964.2
415	MSTRG.80964.3
416	MSTRG.80966.1
417	MSTRG.80968.1
418	MSTRG.80968.3
419	MSTRG.81461.1
420	MSTRG.81673.1
421	MSTRG.81674.10
422	MSTRG.81868.22
423	MSTRG.82118.2
424	MSTRG.82208.2
425	MSTRG.82208.3
426	MSTRG.8310.1
427	MSTRG.83427.5
428	MSTRG.83640.1
429	MSTRG.83884.2
430	MSTRG.83884.3
431	MSTRG.83884.4
432	MSTRG.84322.1
433	MSTRG.8462.1
434	MSTRG.84816.1
435	MSTRG.85043.1
436	MSTRG.85978.1
437	MSTRG.86264.2
438	MSTRG.86315.7
439	MSTRG.86867.64
440	MSTRG.86903.26
441	MSTRG.86999.2
442	MSTRG.87560.41
443	MSTRG.8786.2
444	MSTRG.88104.1
445	MSTRG.88443.3
446	MSTRG.88751.1
447	MSTRG.88815.2
448	MSTRG.89856.4
449	MSTRG.89937.1
450	MSTRG.9003.1
451	MSTRG.90044.1
452	MSTRG.90044.3
453	MSTRG.90045.2
454	MSTRG.90091.1
455	MSTRG.90137.3
456	MSTRG.90150.1
457	MSTRG.90755.1
458	MSTRG.90879.4
459	MSTRG.90946.1
460	MSTRG.91113.2
461	MSTRG.91135.2
462	MSTRG.92067.1
463	MSTRG.92083.1
464	MSTRG.9222.1
465	MSTRG.92392.2
466	MSTRG.92404.2
467	MSTRG.93681.2
468	MSTRG.93932.2
469	MSTRG.93984.1
470	MSTRG.94172.1
471	MSTRG.94172.3
472	MSTRG.94706.1
473	MSTRG.94847.2
474	MSTRG.96200.2
475	MSTRG.96269.1
476	MSTRG.96882.1
477	MSTRG.97353.2
478	MSTRG.97419.2
479	MSTRG.97448.2
480	MSTRG.98275.3
481	MSTRG.98593.2
482	MSTRG.99130.2
483	MSTRG.9914.1
484	MSTRG.99153.1
485	MSTRG.99153.2
486	MSTRG.99153.3
487	MSTRG.99153.6
488	MSTRG.99153.7
489	MSTRG.99153.8
490	MSTRG.99563.1
491	MSTRG.99734.1

## Sheet: Table S6-4
Table S6-4 List of lncRNAs expressed in leaves only
No.	LncRNA_ID
1	MSTRG.100586.11
2	MSTRG.100688.2
3	MSTRG.101502.4
4	MSTRG.101885.1
5	MSTRG.102534.1
6	MSTRG.102901.1
7	MSTRG.104245.2
8	MSTRG.105634.3
9	MSTRG.106042.2
10	MSTRG.10690.5
11	MSTRG.10690.6
12	MSTRG.107415.1
13	MSTRG.107418.1
14	MSTRG.109367.4
15	MSTRG.109568.1
16	MSTRG.110055.7
17	MSTRG.110083.1
18	MSTRG.110251.1
19	MSTRG.1111.2
20	MSTRG.111811.1
21	MSTRG.112101.1
22	MSTRG.11953.4
23	MSTRG.11953.6
24	MSTRG.11953.7
25	MSTRG.119849.1
26	MSTRG.11988.2
27	MSTRG.120013.1
28	MSTRG.120237.6
29	MSTRG.12123.2
30	MSTRG.12123.3
31	MSTRG.121288.1
32	MSTRG.12216.2
33	MSTRG.124152.1
34	MSTRG.125256.2
35	MSTRG.125485.1
36	MSTRG.125492.1
37	MSTRG.12573.1
38	MSTRG.126194.2
39	MSTRG.126407.2
40	MSTRG.126554.1
41	MSTRG.126971.4
42	MSTRG.127055.3
43	MSTRG.128458.1
44	MSTRG.12850.2
45	MSTRG.12896.8
46	MSTRG.129382.1
47	MSTRG.129479.5
48	MSTRG.129566.2
49	MSTRG.129614.1
50	MSTRG.130714.1
51	MSTRG.131631.1
52	MSTRG.132024.1
53	MSTRG.132685.1
54	MSTRG.133019.1
55	MSTRG.133085.14
56	MSTRG.133255.1
57	MSTRG.134321.1
58	MSTRG.134325.2
59	MSTRG.134486.1
60	MSTRG.134930.2
61	MSTRG.135279.2
62	MSTRG.137353.3
63	MSTRG.138201.1
64	MSTRG.138276.11
65	MSTRG.138506.3
66	MSTRG.138590.29
67	MSTRG.139383.17
68	MSTRG.139420.4
69	MSTRG.139856.1
70	MSTRG.139857.2
71	MSTRG.140195.2
72	MSTRG.140886.50
73	MSTRG.141153.5
74	MSTRG.141153.6
75	MSTRG.142473.1
76	MSTRG.143291.1
77	MSTRG.14411.54
78	MSTRG.144191.5
79	MSTRG.145989.1
80	MSTRG.146372.86
81	MSTRG.146633.2
82	MSTRG.14762.2
83	MSTRG.14972.59
84	MSTRG.15104.1
85	MSTRG.15521.1
86	MSTRG.15529.4
87	MSTRG.17378.2
88	MSTRG.18199.2
89	MSTRG.18642.7
90	MSTRG.19031.1
91	MSTRG.19241.1
92	MSTRG.20035.5
93	MSTRG.20286.1
94	MSTRG.20385.1
95	MSTRG.2182.2
96	MSTRG.22816.5
97	MSTRG.22962.1
98	MSTRG.2308.4
99	MSTRG.23880.1
100	MSTRG.2414.1
101	MSTRG.24209.1
102	MSTRG.24295.5
103	MSTRG.24640.2
104	MSTRG.24683.2
105	MSTRG.24740.2
106	MSTRG.24932.20
107	MSTRG.25233.2
108	MSTRG.25495.1
109	MSTRG.25535.18
110	MSTRG.25547.34
111	MSTRG.25772.1
112	MSTRG.25992.1
113	MSTRG.2679.1
114	MSTRG.27712.4
115	MSTRG.28245.2
116	MSTRG.28908.6
117	MSTRG.28991.1
118	MSTRG.29390.15
119	MSTRG.30765.1
120	MSTRG.30975.1
121	MSTRG.31014.1
122	MSTRG.31243.2
123	MSTRG.31398.1
124	MSTRG.32574.2
125	MSTRG.32907.2
126	MSTRG.33212.19
127	MSTRG.33212.20
128	MSTRG.33517.1
129	MSTRG.33814.24
130	MSTRG.3471.1
131	MSTRG.35379.3
132	MSTRG.36004.1
133	MSTRG.36327.1
134	MSTRG.38128.1
135	MSTRG.38591.2
136	MSTRG.39066.1
137	MSTRG.3925.2
138	MSTRG.3953.5
139	MSTRG.39617.3
140	MSTRG.40490.3
141	MSTRG.40491.1
142	MSTRG.41328.1
143	MSTRG.421.2
144	MSTRG.42418.3
145	MSTRG.44735.1
146	MSTRG.4486.1
147	MSTRG.45087.1
148	MSTRG.45226.1
149	MSTRG.45347.1
150	MSTRG.45521.1
151	MSTRG.45628.2
152	MSTRG.46017.2
153	MSTRG.46313.1
154	MSTRG.46514.2
155	MSTRG.47415.2
156	MSTRG.48281.1
157	MSTRG.48673.2
158	MSTRG.48742.2
159	MSTRG.49098.1
160	MSTRG.49628.1
161	MSTRG.49672.1
162	MSTRG.50286.2
163	MSTRG.50551.1
164	MSTRG.5098.1
165	MSTRG.51423.2
166	MSTRG.51929.1
167	MSTRG.52437.2
168	MSTRG.5398.2
169	MSTRG.54965.2
170	MSTRG.55835.12
171	MSTRG.56206.10
172	MSTRG.56486.1
173	MSTRG.56957.1
174	MSTRG.56966.2
175	MSTRG.58716.4
176	MSTRG.61587.1
177	MSTRG.6221.1
178	MSTRG.62442.1
179	MSTRG.62663.2
180	MSTRG.63065.2
181	MSTRG.6327.2
182	MSTRG.63561.2
183	MSTRG.645.3
184	MSTRG.65266.9
185	MSTRG.65634.2
186	MSTRG.65634.3
187	MSTRG.66521.5
188	MSTRG.67244.1
189	MSTRG.67580.1
190	MSTRG.67712.2
191	MSTRG.67808.1
192	MSTRG.71278.2
193	MSTRG.72017.1
194	MSTRG.7315.1
195	MSTRG.74994.2
196	MSTRG.75195.1
197	MSTRG.75325.2
198	MSTRG.75774.1
199	MSTRG.75953.1
200	MSTRG.7603.10
201	MSTRG.76048.3
202	MSTRG.77880.1
203	MSTRG.78010.16
204	MSTRG.78010.5
205	MSTRG.78686.1
206	MSTRG.82112.1
207	MSTRG.82351.1
208	MSTRG.826.1
209	MSTRG.836.2
210	MSTRG.83696.5
211	MSTRG.83922.2
212	MSTRG.84016.2
213	MSTRG.84127.1
214	MSTRG.84846.2
215	MSTRG.85406.1
216	MSTRG.86276.2
217	MSTRG.86418.1
218	MSTRG.86603.1
219	MSTRG.8674.1
220	MSTRG.87448.2
221	MSTRG.88008.1
222	MSTRG.88551.2
223	MSTRG.88783.1
224	MSTRG.89685.2
225	MSTRG.89936.3
226	MSTRG.9109.1
227	MSTRG.91368.1
228	MSTRG.91895.1
229	MSTRG.91909.1
230	MSTRG.93141.4
231	MSTRG.93328.1
232	MSTRG.95007.3
233	MSTRG.95107.1
234	MSTRG.95885.1
235	MSTRG.96514.1
236	MSTRG.96546.1
237	MSTRG.97353.3
238	MSTRG.97554.1
239	MSTRG.98767.1
240	MSTRG.98998.1
241	MSTRG.99044.2
242	MSTRG.99660.1
243	MSTRG.99981.1

## Sheet: Table S6-5
Table S6-5 List of lncRNAs expressed in flowers only
No.	LncRNA_ID
1	MSTRG.100024.1
2	MSTRG.100194.5
3	MSTRG.100194.6
4	MSTRG.101016.2
5	MSTRG.102463.7
6	MSTRG.10286.1
7	MSTRG.103531.1
8	MSTRG.10391.1
9	MSTRG.103941.1
10	MSTRG.104569.1
11	MSTRG.104965.3
12	MSTRG.105138.3
13	MSTRG.105185.1
14	MSTRG.105264.9
15	MSTRG.105558.5
16	MSTRG.10556.1
17	MSTRG.105812.1
18	MSTRG.105877.1
19	MSTRG.106142.1
20	MSTRG.106453.1
21	MSTRG.106507.2
22	MSTRG.106908.2
23	MSTRG.107300.1
24	MSTRG.10742.2
25	MSTRG.10795.2
26	MSTRG.108039.1
27	MSTRG.108074.5
28	MSTRG.108094.1
29	MSTRG.108094.2
30	MSTRG.108116.1
31	MSTRG.108128.1
32	MSTRG.108129.1
33	MSTRG.108221.1
34	MSTRG.108238.3
35	MSTRG.108360.2
36	MSTRG.108371.1
37	MSTRG.10845.2
38	MSTRG.108689.1
39	MSTRG.108690.1
40	MSTRG.108993.1
41	MSTRG.1091.1
42	MSTRG.109462.1
43	MSTRG.109525.2
44	MSTRG.109728.1
45	MSTRG.109748.1
46	MSTRG.10981.1
47	MSTRG.109822.3
48	MSTRG.109956.2
49	MSTRG.109956.3
50	MSTRG.109956.4
51	MSTRG.110039.1
52	MSTRG.110334.1
53	MSTRG.110434.2
54	MSTRG.110438.1
55	MSTRG.110503.1
56	MSTRG.110669.1
57	MSTRG.110854.1
58	MSTRG.110854.2
59	MSTRG.110912.3
60	MSTRG.110959.2
61	MSTRG.111190.1
62	MSTRG.111256.4
63	MSTRG.111586.1
64	MSTRG.111587.1
65	MSTRG.1123.1
66	MSTRG.112353.1
67	MSTRG.11237.1
68	MSTRG.1124.1
69	MSTRG.112454.1
70	MSTRG.112496.1
71	MSTRG.113252.1
72	MSTRG.113564.1
73	MSTRG.113768.1
74	MSTRG.113976.1
75	MSTRG.114251.1
76	MSTRG.114252.1
77	MSTRG.114252.2
78	MSTRG.114295.1
79	MSTRG.114376.8
80	MSTRG.115166.1
81	MSTRG.115354.1
82	MSTRG.116257.1
83	MSTRG.120035.2
84	MSTRG.120073.1
85	MSTRG.120107.1
86	MSTRG.120243.1
87	MSTRG.120409.1
88	MSTRG.120687.2
89	MSTRG.120687.3
90	MSTRG.120687.4
91	MSTRG.121262.4
92	MSTRG.121625.1
93	MSTRG.121787.1
94	MSTRG.121963.1
95	MSTRG.122039.7
96	MSTRG.122096.1
97	MSTRG.122310.1
98	MSTRG.122684.1
99	MSTRG.123192.1
100	MSTRG.123723.2
101	MSTRG.124086.1
102	MSTRG.124282.1
103	MSTRG.12434.2
104	MSTRG.124394.2
105	MSTRG.124395.1
106	MSTRG.124495.1
107	MSTRG.124495.2
108	MSTRG.124495.3
109	MSTRG.124495.4
110	MSTRG.124503.1
111	MSTRG.12469.2
112	MSTRG.124702.2
113	MSTRG.124896.4
114	MSTRG.125006.1
115	MSTRG.125307.1
116	MSTRG.125307.3
117	MSTRG.125556.7
118	MSTRG.125567.1
119	MSTRG.125737.1
120	MSTRG.125856.2
121	MSTRG.125956.1
122	MSTRG.126174.1
123	MSTRG.126196.1
124	MSTRG.12638.9
125	MSTRG.126501.1
126	MSTRG.126550.1
127	MSTRG.126552.2
128	MSTRG.126586.1
129	MSTRG.126796.1
130	MSTRG.126864.1
131	MSTRG.127029.1
132	MSTRG.127091.1
133	MSTRG.127189.2
134	MSTRG.127352.1
135	MSTRG.127486.2
136	MSTRG.127558.2
137	MSTRG.127788.2
138	MSTRG.128344.1
139	MSTRG.128360.1
140	MSTRG.128436.1
141	MSTRG.128436.2
142	MSTRG.129322.1
143	MSTRG.129455.1
144	MSTRG.12980.1
145	MSTRG.130140.1
146	MSTRG.130948.2
147	MSTRG.131133.1
148	MSTRG.132073.1
149	MSTRG.132229.1
150	MSTRG.132697.1
151	MSTRG.132748.2
152	MSTRG.133122.1
153	MSTRG.133174.1
154	MSTRG.133846.4
155	MSTRG.134134.1
156	MSTRG.134134.2
157	MSTRG.134237.1
158	MSTRG.134289.1
159	MSTRG.134430.1
160	MSTRG.134568.1
161	MSTRG.134568.2
162	MSTRG.134680.1
163	MSTRG.134799.2
164	MSTRG.135943.1
165	MSTRG.136005.1
166	MSTRG.136091.3
167	MSTRG.136256.3
168	MSTRG.136547.2
169	MSTRG.136648.1
170	MSTRG.136677.1
171	MSTRG.136677.2
172	MSTRG.136814.1
173	MSTRG.136849.1
174	MSTRG.136880.11
175	MSTRG.137069.2
176	MSTRG.137264.2
177	MSTRG.137356.10
178	MSTRG.137577.1
179	MSTRG.137577.2
180	MSTRG.137578.2
181	MSTRG.137626.2
182	MSTRG.137845.2
183	MSTRG.137944.2
184	MSTRG.138454.1
185	MSTRG.138717.1
186	MSTRG.138838.1
187	MSTRG.138866.1
188	MSTRG.138866.2
189	MSTRG.138867.1
190	MSTRG.138991.1
191	MSTRG.139203.1
192	MSTRG.139233.1
193	MSTRG.139334.1
194	MSTRG.1396.1
195	MSTRG.139714.1
196	MSTRG.139768.2
197	MSTRG.140332.2
198	MSTRG.140403.1
199	MSTRG.140886.26
200	MSTRG.141006.1
201	MSTRG.141205.2
202	MSTRG.141205.3
203	MSTRG.141252.4
204	MSTRG.141663.1
205	MSTRG.141928.1
206	MSTRG.142071.1
207	MSTRG.142211.1
208	MSTRG.142400.3
209	MSTRG.142400.4
210	MSTRG.142557.2
211	MSTRG.142611.1
212	MSTRG.142776.1
213	MSTRG.142776.2
214	MSTRG.142776.3
215	MSTRG.142776.4
216	MSTRG.142776.5
217	MSTRG.142891.1
218	MSTRG.142891.2
219	MSTRG.142991.1
220	MSTRG.143296.2
221	MSTRG.143366.1
222	MSTRG.143648.1
223	MSTRG.143648.3
224	MSTRG.143648.4
225	MSTRG.143648.6
226	MSTRG.143674.2
227	MSTRG.143779.1
228	MSTRG.143926.1
229	MSTRG.143960.2
230	MSTRG.144007.2
231	MSTRG.144168.4
232	MSTRG.144168.5
233	MSTRG.144216.2
234	MSTRG.144806.2
235	MSTRG.145063.1
236	MSTRG.145213.1
237	MSTRG.145293.1
238	MSTRG.145538.1
239	MSTRG.145565.1
240	MSTRG.145618.1
241	MSTRG.145758.1
242	MSTRG.145878.1
243	MSTRG.146003.2
244	MSTRG.146379.1
245	MSTRG.1498.6
246	MSTRG.14989.357
247	MSTRG.15206.1
248	MSTRG.1524.1
249	MSTRG.15288.1
250	MSTRG.15824.1
251	MSTRG.16685.1
252	MSTRG.16702.2
253	MSTRG.17310.1
254	MSTRG.17430.4
255	MSTRG.1781.1
256	MSTRG.1782.1
257	MSTRG.17869.1
258	MSTRG.18277.1
259	MSTRG.18503.1
260	MSTRG.18505.1
261	MSTRG.18695.1
262	MSTRG.18699.1
263	MSTRG.18700.1
264	MSTRG.18890.1
265	MSTRG.19071.1
266	MSTRG.19261.1
267	MSTRG.19288.1
268	MSTRG.19288.2
269	MSTRG.19289.1
270	MSTRG.19312.1
271	MSTRG.19400.1
272	MSTRG.19419.1
273	MSTRG.19483.1
274	MSTRG.19868.17
275	MSTRG.19968.1
276	MSTRG.19978.1
277	MSTRG.19978.2
278	MSTRG.19986.1
279	MSTRG.20063.1
280	MSTRG.20063.2
281	MSTRG.20304.1
282	MSTRG.20326.1
283	MSTRG.20441.1
284	MSTRG.21041.4
285	MSTRG.21200.1
286	MSTRG.21423.1
287	MSTRG.2174.1
288	MSTRG.21806.2
289	MSTRG.2214.6
290	MSTRG.2228.1
291	MSTRG.22531.1
292	MSTRG.22533.1
293	MSTRG.22774.1
294	MSTRG.22807.2
295	MSTRG.22974.10
296	MSTRG.22974.5
297	MSTRG.23322.1
298	MSTRG.23436.1
299	MSTRG.23461.1
300	MSTRG.23462.2
301	MSTRG.23493.1
302	MSTRG.23494.1
303	MSTRG.23533.2
304	MSTRG.23661.2
305	MSTRG.23702.4
306	MSTRG.23787.1
307	MSTRG.23787.2
308	MSTRG.23824.1
309	MSTRG.23834.1
310	MSTRG.24296.1
311	MSTRG.24718.1
312	MSTRG.24761.1
313	MSTRG.2506.2
314	MSTRG.25195.4
315	MSTRG.25366.1
316	MSTRG.25621.1
317	MSTRG.25824.1
318	MSTRG.26037.2
319	MSTRG.26163.1
320	MSTRG.26895.94
321	MSTRG.26919.1
322	MSTRG.26985.1
323	MSTRG.27147.2
324	MSTRG.27399.1
325	MSTRG.2759.1
326	MSTRG.27845.1
327	MSTRG.2819.1
328	MSTRG.28261.1
329	MSTRG.28360.2
330	MSTRG.28446.1
331	MSTRG.28450.1
332	MSTRG.28710.1
333	MSTRG.28775.1
334	MSTRG.28838.2
335	MSTRG.29394.1
336	MSTRG.2983.1
337	MSTRG.30481.1
338	MSTRG.3111.1
339	MSTRG.31282.13
340	MSTRG.31628.1
341	MSTRG.31629.1
342	MSTRG.31737.3
343	MSTRG.31738.1
344	MSTRG.31945.2
345	MSTRG.31960.2
346	MSTRG.32193.1
347	MSTRG.32233.1
348	MSTRG.32312.1
349	MSTRG.32458.1
350	MSTRG.32458.2
351	MSTRG.32458.6
352	MSTRG.32655.1
353	MSTRG.333.1
354	MSTRG.33334.1
355	MSTRG.34004.1
356	MSTRG.34169.62
357	MSTRG.34329.1
358	MSTRG.34566.1
359	MSTRG.34660.4
360	MSTRG.34660.5
361	MSTRG.34961.1
362	MSTRG.35555.2
363	MSTRG.36246.15
364	MSTRG.36370.2
365	MSTRG.36444.1
366	MSTRG.36559.1
367	MSTRG.36765.1
368	MSTRG.37143.1
369	MSTRG.37268.1
370	MSTRG.37558.1
371	MSTRG.37560.3
372	MSTRG.37571.1
373	MSTRG.37634.1
374	MSTRG.37674.10
375	MSTRG.37674.5
376	MSTRG.37674.6
377	MSTRG.37674.9
378	MSTRG.37726.1
379	MSTRG.37843.1
380	MSTRG.38330.1
381	MSTRG.38331.3
382	MSTRG.38369.1
383	MSTRG.3855.1
384	MSTRG.38589.1
385	MSTRG.38676.1
386	MSTRG.38802.1
387	MSTRG.38859.1
388	MSTRG.389.1
389	MSTRG.38969.1
390	MSTRG.38997.1
391	MSTRG.39039.1
392	MSTRG.39088.1
393	MSTRG.39246.1
394	MSTRG.39295.1
395	MSTRG.39347.1
396	MSTRG.3948.1
397	MSTRG.39595.1
398	MSTRG.39885.1
399	MSTRG.399.1
400	MSTRG.40017.1
401	MSTRG.40018.1
402	MSTRG.4008.1
403	MSTRG.40228.1
404	MSTRG.40274.1
405	MSTRG.40278.1
406	MSTRG.40278.2
407	MSTRG.4048.1
408	MSTRG.40490.4
409	MSTRG.40536.1
410	MSTRG.40612.1
411	MSTRG.41216.1
412	MSTRG.41243.1
413	MSTRG.4139.1
414	MSTRG.41529.5
415	MSTRG.41552.128
416	MSTRG.42029.1
417	MSTRG.42077.2
418	MSTRG.42077.3
419	MSTRG.42263.1
420	MSTRG.42418.4
421	MSTRG.42450.1
422	MSTRG.42453.1
423	MSTRG.42576.1
424	MSTRG.42583.6
425	MSTRG.42886.1
426	MSTRG.42904.1
427	MSTRG.431.1
428	MSTRG.43748.10
429	MSTRG.4375.1
430	MSTRG.44007.1
431	MSTRG.44635.1
432	MSTRG.44635.7
433	MSTRG.44926.4
434	MSTRG.44973.1
435	MSTRG.45057.1
436	MSTRG.4519.6
437	MSTRG.4550.1
438	MSTRG.45556.1
439	MSTRG.45745.2
440	MSTRG.45916.1
441	MSTRG.46822.1
442	MSTRG.4696.1
443	MSTRG.47015.1
444	MSTRG.47629.1
445	MSTRG.48164.1
446	MSTRG.48213.2
447	MSTRG.48319.1
448	MSTRG.48320.1
449	MSTRG.48396.1
450	MSTRG.48416.1
451	MSTRG.4871.1
452	MSTRG.48910.1
453	MSTRG.48910.3
454	MSTRG.48913.1
455	MSTRG.49080.1
456	MSTRG.4914.1
457	MSTRG.49281.1
458	MSTRG.49867.1
459	MSTRG.49873.1
460	MSTRG.4995.1
461	MSTRG.5007.1
462	MSTRG.5031.2
463	MSTRG.50594.2
464	MSTRG.50687.2
465	MSTRG.50721.1
466	MSTRG.51078.1
467	MSTRG.51100.2
468	MSTRG.51286.2
469	MSTRG.51812.1
470	MSTRG.52042.4
471	MSTRG.5350.1
472	MSTRG.53883.2
473	MSTRG.54215.1
474	MSTRG.54274.1
475	MSTRG.54323.6
476	MSTRG.5454.1
477	MSTRG.54746.1
478	MSTRG.54919.1
479	MSTRG.55639.1
480	MSTRG.55930.1
481	MSTRG.55970.6
482	MSTRG.56146.2
483	MSTRG.56341.1
484	MSTRG.5657.1
485	MSTRG.56603.2
486	MSTRG.5695.2
487	MSTRG.57290.1
488	MSTRG.57315.20
489	MSTRG.57360.1
490	MSTRG.57800.1
491	MSTRG.58133.1
492	MSTRG.58133.2
493	MSTRG.58133.3
494	MSTRG.5837.1
495	MSTRG.58789.4
496	MSTRG.5893.1
497	MSTRG.5901.2
498	MSTRG.5902.2
499	MSTRG.5902.3
500	MSTRG.59215.4
501	MSTRG.59355.1
502	MSTRG.59369.14
503	MSTRG.5940.1
504	MSTRG.59701.1
505	MSTRG.5979.1
506	MSTRG.60760.1
507	MSTRG.61711.1
508	MSTRG.61711.2
509	MSTRG.62071.1
510	MSTRG.62149.1
511	MSTRG.62328.1
512	MSTRG.63436.2
513	MSTRG.63484.2
514	MSTRG.63717.2
515	MSTRG.63717.3
516	MSTRG.64559.9
517	MSTRG.64680.5
518	MSTRG.64851.2
519	MSTRG.64889.1
520	MSTRG.6500.1
521	MSTRG.65119.1
522	MSTRG.65138.1
523	MSTRG.6522.1
524	MSTRG.65595.24
525	MSTRG.65678.1
526	MSTRG.65737.11
527	MSTRG.65737.12
528	MSTRG.65813.1
529	MSTRG.65853.1
530	MSTRG.66028.2
531	MSTRG.66257.2
532	MSTRG.66711.1
533	MSTRG.67276.2
534	MSTRG.67282.1
535	MSTRG.6745.1
536	MSTRG.67853.2
537	MSTRG.6801.1
538	MSTRG.68106.4
539	MSTRG.68316.4
540	MSTRG.68563.2
541	MSTRG.68735.2
542	MSTRG.690.1
543	MSTRG.69042.1
544	MSTRG.69189.2
545	MSTRG.69490.2
546	MSTRG.69550.5
547	MSTRG.69913.1
548	MSTRG.69961.1
549	MSTRG.69993.1
550	MSTRG.70276.1
551	MSTRG.70276.2
552	MSTRG.7073.1
553	MSTRG.70850.7
554	MSTRG.70856.1
555	MSTRG.70856.2
556	MSTRG.71035.1
557	MSTRG.71154.3
558	MSTRG.71227.3
559	MSTRG.7171.1
560	MSTRG.71836.2
561	MSTRG.71879.3
562	MSTRG.71999.1
563	MSTRG.71999.2
564	MSTRG.71999.3
565	MSTRG.72021.1
566	MSTRG.7205.1
567	MSTRG.72328.1
568	MSTRG.72328.2
569	MSTRG.72567.1
570	MSTRG.7264.1
571	MSTRG.72921.1
572	MSTRG.72989.1
573	MSTRG.72989.2
574	MSTRG.73540.1
575	MSTRG.73540.2
576	MSTRG.74273.1
577	MSTRG.74403.6
578	MSTRG.74598.1
579	MSTRG.74843.1
580	MSTRG.74854.1
581	MSTRG.75173.1
582	MSTRG.7542.1
583	MSTRG.75534.1
584	MSTRG.75535.2
585	MSTRG.75635.1
586	MSTRG.75705.2
587	MSTRG.75928.2
588	MSTRG.76404.1
589	MSTRG.7663.1
590	MSTRG.7666.1
591	MSTRG.76766.2
592	MSTRG.7714.1
593	MSTRG.77329.1
594	MSTRG.77329.2
595	MSTRG.77329.3
596	MSTRG.77740.1
597	MSTRG.77740.2
598	MSTRG.7778.1
599	MSTRG.77834.1
600	MSTRG.78010.12
601	MSTRG.78010.13
602	MSTRG.78148.1
603	MSTRG.78265.1
604	MSTRG.78505.5
605	MSTRG.78536.1
606	MSTRG.7855.1
607	MSTRG.78873.1
608	MSTRG.79196.3
609	MSTRG.79256.1
610	MSTRG.79473.1
611	MSTRG.79768.1
612	MSTRG.79807.2
613	MSTRG.79813.1
614	MSTRG.80240.1
615	MSTRG.80436.1
616	MSTRG.80520.1
617	MSTRG.80776.1
618	MSTRG.80892.1
619	MSTRG.8100.1
620	MSTRG.8100.2
621	MSTRG.81253.1
622	MSTRG.81256.1
623	MSTRG.81256.2
624	MSTRG.81284.1
625	MSTRG.81598.1
626	MSTRG.81651.1
627	MSTRG.8172.1
628	MSTRG.82329.1
629	MSTRG.82446.2
630	MSTRG.8276.1
631	MSTRG.8296.1
632	MSTRG.83151.1
633	MSTRG.83152.1
634	MSTRG.83433.1
635	MSTRG.83484.1
636	MSTRG.83817.2
637	MSTRG.83845.1
638	MSTRG.83933.1
639	MSTRG.84422.1
640	MSTRG.84423.1
641	MSTRG.85238.1
642	MSTRG.85308.1
643	MSTRG.85488.1
644	MSTRG.85951.1
645	MSTRG.86108.1
646	MSTRG.86171.1
647	MSTRG.86639.1
648	MSTRG.86843.1
649	MSTRG.87219.1
650	MSTRG.8722.1
651	MSTRG.87646.1
652	MSTRG.87758.1
653	MSTRG.88023.1
654	MSTRG.88223.4
655	MSTRG.88493.2
656	MSTRG.88511.2
657	MSTRG.88755.1
658	MSTRG.88868.1
659	MSTRG.89102.1
660	MSTRG.89457.1
661	MSTRG.89654.1
662	MSTRG.89830.1
663	MSTRG.90145.1
664	MSTRG.90342.1
665	MSTRG.90362.2
666	MSTRG.90362.4
667	MSTRG.90492.2
668	MSTRG.90492.3
669	MSTRG.90522.1
670	MSTRG.90577.3
671	MSTRG.90689.2
672	MSTRG.90974.1
673	MSTRG.91002.1
674	MSTRG.91372.1
675	MSTRG.91376.1
676	MSTRG.91502.2
677	MSTRG.91502.3
678	MSTRG.91502.4
679	MSTRG.91665.2
680	MSTRG.92186.3
681	MSTRG.92186.4
682	MSTRG.92235.1
683	MSTRG.9232.1
684	MSTRG.925.1
685	MSTRG.92709.1
686	MSTRG.92827.1
687	MSTRG.92827.2
688	MSTRG.92953.1
689	MSTRG.9297.1
690	MSTRG.93568.1
691	MSTRG.93824.1
692	MSTRG.94134.1
693	MSTRG.94751.1
694	MSTRG.94751.2
695	MSTRG.94771.1
696	MSTRG.9485.1
697	MSTRG.95290.1
698	MSTRG.95825.1
699	MSTRG.96084.1
700	MSTRG.96408.2
701	MSTRG.96547.1
702	MSTRG.97278.2
703	MSTRG.97488.1
704	MSTRG.97590.1
705	MSTRG.97724.5
706	MSTRG.97781.2
707	MSTRG.97828.1
708	MSTRG.97838.1
709	MSTRG.98119.1
710	MSTRG.98135.3
711	MSTRG.98343.1
712	MSTRG.98343.2
713	MSTRG.98343.3
714	MSTRG.98343.4
715	MSTRG.98702.1
716	MSTRG.98702.2
717	MSTRG.98763.1
718	MSTRG.988.1
719	MSTRG.99342.3
720	MSTRG.99574.2
721	MSTRG.99874.1

## Sheet: Table S6-6
Table S6-6 List of lncRNAs expressed in fruits only
No.	LncRNA_ID
1	MSTRG.103911.4
2	MSTRG.106716.1
3	MSTRG.106777.2
4	MSTRG.108921.2
5	MSTRG.110508.5
6	MSTRG.110742.2
7	MSTRG.111667.2
8	MSTRG.112368.1
9	MSTRG.112430.4
10	MSTRG.113182.20
11	MSTRG.113208.1
12	MSTRG.113208.2
13	MSTRG.113884.2
14	MSTRG.11457.2
15	MSTRG.114764.1
16	MSTRG.11513.4
17	MSTRG.116449.1
18	MSTRG.1166.1
19	MSTRG.1166.3
20	MSTRG.121825.2
21	MSTRG.123430.2
22	MSTRG.123784.1
23	MSTRG.124329.11
24	MSTRG.125210.1
25	MSTRG.126194.5
26	MSTRG.127548.2
27	MSTRG.128787.12
28	MSTRG.128988.3
29	MSTRG.129954.1
30	MSTRG.13018.2
31	MSTRG.130922.2
32	MSTRG.131788.2
33	MSTRG.134766.6
34	MSTRG.135565.2
35	MSTRG.135852.2
36	MSTRG.137264.4
37	MSTRG.137990.1
38	MSTRG.138614.2
39	MSTRG.139420.24
40	MSTRG.139818.2
41	MSTRG.140605.4
42	MSTRG.141355.1
43	MSTRG.14137.1
44	MSTRG.141819.3
45	MSTRG.144578.3
46	MSTRG.145626.2
47	MSTRG.146337.1
48	MSTRG.19151.1
49	MSTRG.193.1
50	MSTRG.20237.2
51	MSTRG.20420.5
52	MSTRG.20509.13
53	MSTRG.21950.2
54	MSTRG.22048.1
55	MSTRG.22975.13
56	MSTRG.24295.7
57	MSTRG.24806.9
58	MSTRG.25255.2
59	MSTRG.25255.3
60	MSTRG.25911.2
61	MSTRG.26200.1
62	MSTRG.26200.2
63	MSTRG.26200.3
64	MSTRG.26240.1
65	MSTRG.26484.1
66	MSTRG.26593.1
67	MSTRG.27164.3
68	MSTRG.27304.5
69	MSTRG.27794.8
70	MSTRG.28009.1
71	MSTRG.28350.2
72	MSTRG.29824.2
73	MSTRG.31230.9
74	MSTRG.31282.10
75	MSTRG.31945.1
76	MSTRG.32705.1
77	MSTRG.33182.1
78	MSTRG.33231.1
79	MSTRG.33233.1
80	MSTRG.33814.39
81	MSTRG.34207.1
82	MSTRG.37106.2
83	MSTRG.37106.3
84	MSTRG.3726.2
85	MSTRG.37622.2
86	MSTRG.38844.11
87	MSTRG.38844.14
88	MSTRG.39932.14
89	MSTRG.40447.12
90	MSTRG.40447.13
91	MSTRG.40447.15
92	MSTRG.40599.1
93	MSTRG.41538.2
94	MSTRG.41811.4
95	MSTRG.41849.1
96	MSTRG.41870.2
97	MSTRG.41870.6
98	MSTRG.41870.7
99	MSTRG.42701.5
100	MSTRG.43210.1
101	MSTRG.44373.13
102	MSTRG.45940.2
103	MSTRG.46763.1
104	MSTRG.46978.1
105	MSTRG.47101.1
106	MSTRG.47966.4
107	MSTRG.47973.4
108	MSTRG.4839.1
109	MSTRG.49902.3
110	MSTRG.50433.2
111	MSTRG.50893.2
112	MSTRG.51048.4
113	MSTRG.51357.1
114	MSTRG.52471.1
115	MSTRG.52649.2
116	MSTRG.53628.3
117	MSTRG.53838.2
118	MSTRG.53923.3
119	MSTRG.54173.3
120	MSTRG.54826.1
121	MSTRG.55562.5
122	MSTRG.56204.4
123	MSTRG.58102.1
124	MSTRG.58726.6
125	MSTRG.59836.1
126	MSTRG.60478.3
127	MSTRG.60895.2
128	MSTRG.6154.2
129	MSTRG.62144.1
130	MSTRG.64503.2
131	MSTRG.64544.2
132	MSTRG.65034.2
133	MSTRG.65172.1
134	MSTRG.65172.3
135	MSTRG.65172.4
136	MSTRG.65172.5
137	MSTRG.65172.7
138	MSTRG.65172.8
139	MSTRG.67644.2
140	MSTRG.67681.1
141	MSTRG.67681.2
142	MSTRG.68185.1
143	MSTRG.72466.21
144	MSTRG.73166.1
145	MSTRG.73199.1
146	MSTRG.74593.4
147	MSTRG.75429.1
148	MSTRG.75630.1
149	MSTRG.75751.1
150	MSTRG.75932.1
151	MSTRG.76418.6
152	MSTRG.76664.2
153	MSTRG.77404.2
154	MSTRG.77404.4
155	MSTRG.77532.2
156	MSTRG.7762.1
157	MSTRG.78010.15
158	MSTRG.79153.2
159	MSTRG.8000.1
160	MSTRG.80345.1
161	MSTRG.81106.17
162	MSTRG.81350.1
163	MSTRG.8181.9
164	MSTRG.82087.4
165	MSTRG.83750.1
166	MSTRG.83773.2
167	MSTRG.8410.2
168	MSTRG.861.8
169	MSTRG.86715.1
170	MSTRG.89880.1
171	MSTRG.90439.1
172	MSTRG.90581.10
173	MSTRG.90593.5
174	MSTRG.9107.1
175	MSTRG.93364.1
176	MSTRG.93575.1
177	MSTRG.93575.2
178	MSTRG.93575.4
179	MSTRG.94511.2
180	MSTRG.96048.1
181	MSTRG.97507.4
182	MSTRG.97507.5
183	MSTRG.97822.1
184	MSTRG.98564.3
