# Supplementary material for: Expression Profiles and Characteristics of Apple lncRNAs in Roots, Phloem, Leaves, Flowers, and Fruit
Source: Int J Mol Sci. 2022 May 25;23(11):5931. doi: 10.3390/ijms23115931 (PMC9180697; doi:10.3390/ijms23115931)
Supplement: Supplementary file 1 [file ijms-23-05931-s001.zip › Table S7.xlsx]

## Sheet: Sheet1
Table S7 Precursor prediction for lncRNAs for miRNAs
No.	LncRNA_ID	miRNA_hp	LncRNA_start	LncRNA_end
1	MSTRG.76051.5	mdm-miR482a	202	356
2	MSTRG.76051.8	mdm-miR482a	52	206
3	MSTRG.76051.6	mdm-miR482a	202	356
4	MSTRG.121641.31	mdm-miR156a	5548	5459
5	MSTRG.121641.32	mdm-miR156a	6028	5939
6	MSTRG.121641.29	mdm-miR156a	1544	1455
7	MSTRG.121641.36	mdm-miR156a	1151	1062
8	MSTRG.121641.35	mdm-miR156a	1407	1318
9	MSTRG.121641.28	mdm-miR156a	5377	5288
10	MSTRG.121641.34	mdm-miR156a	1884	1795
11	MSTRG.121641.37	mdm-miR156a	1123	1034
12	MSTRG.121641.3	mdm-miR156a	6069	5980
13	MSTRG.121644.1	mdm-miR156a	335	247
14	MSTRG.63448.2	mdm-miR156b	308	391
15	MSTRG.121644.1	mdm-miR156c	335	245
16	MSTRG.121641.3	mdm-miR156c	6071	5978
17	MSTRG.121641.31	mdm-miR156c	5550	5459
18	MSTRG.121641.32	mdm-miR156c	6030	5939
19	MSTRG.121641.29	mdm-miR156c	1546	1455
20	MSTRG.121641.36	mdm-miR156c	1153	1062
21	MSTRG.121641.35	mdm-miR156c	1409	1318
22	MSTRG.121641.28	mdm-miR156c	5379	5288
23	MSTRG.121641.34	mdm-miR156c	1886	1795
24	MSTRG.121641.37	mdm-miR156c	1125	1034
25	MSTRG.121641.31	mdm-miR156e	5548	5459
26	MSTRG.121641.32	mdm-miR156e	6028	5939
27	MSTRG.121641.29	mdm-miR156e	1544	1455
28	MSTRG.121641.36	mdm-miR156e	1151	1062
29	MSTRG.121641.35	mdm-miR156e	1407	1318
30	MSTRG.121641.28	mdm-miR156e	5377	5288
31	MSTRG.121641.34	mdm-miR156e	1884	1795
32	MSTRG.121641.37	mdm-miR156e	1123	1034
33	MSTRG.121641.3	mdm-miR156e	6069	5980
34	MSTRG.121644.1	mdm-miR156e	335	247
35	MSTRG.17430.4	mdm-miR156f	191	1
36	MSTRG.63448.2	mdm-miR156g	303	396
37	MSTRG.121644.1	mdm-miR156h	335	245
38	MSTRG.121641.3	mdm-miR156h	6071	5978
39	MSTRG.121641.31	mdm-miR156h	5550	5459
40	MSTRG.121641.32	mdm-miR156h	6030	5939
41	MSTRG.121641.29	mdm-miR156h	1546	1455
42	MSTRG.121641.36	mdm-miR156h	1153	1062
43	MSTRG.121641.35	mdm-miR156h	1409	1318
44	MSTRG.121641.28	mdm-miR156h	5379	5288
45	MSTRG.121641.34	mdm-miR156h	1886	1795
46	MSTRG.121641.37	mdm-miR156h	1125	1034
47	MSTRG.63448.2	mdm-miR156i	306	394
48	MSTRG.121644.1	mdm-miR156j	335	248
49	MSTRG.121641.3	mdm-miR156j	6068	5981
50	MSTRG.121641.31	mdm-miR156j	5547	5460
51	MSTRG.121641.32	mdm-miR156j	6027	5940
52	MSTRG.121641.29	mdm-miR156j	1543	1456
53	MSTRG.121641.36	mdm-miR156j	1150	1063
54	MSTRG.121641.35	mdm-miR156j	1406	1319
55	MSTRG.121641.28	mdm-miR156j	5376	5289
56	MSTRG.121641.34	mdm-miR156j	1883	1796
57	MSTRG.121641.37	mdm-miR156j	1122	1035
58	MSTRG.17430.4	mdm-miR156k	160	17
59	MSTRG.63448.2	mdm-miR156m	294	407
60	MSTRG.17430.4	mdm-miR156n	157	20
61	MSTRG.63448.2	mdm-miR156o	305	391
62	MSTRG.10845.1	mdm-miR160c	2677	2590
63	MSTRG.10845.2	mdm-miR160c	2336	2249
64	MSTRG.10845.1	mdm-miR160e	2677	2590
65	MSTRG.10845.2	mdm-miR160e	2336	2249
66	MSTRG.52860.2	mdm-miR162a	876	783
67	MSTRG.52860.3	mdm-miR162a	2095	2002
68	MSTRG.52860.2	mdm-miR162b	876	783
69	MSTRG.52860.3	mdm-miR162b	2095	2002
70	MSTRG.142473.1	mdm-miR164a	157	260
71	MSTRG.35007.3	mdm-miR164e	218	387
72	MSTRG.35007.6	mdm-miR164e	185	354
73	MSTRG.35007.2	mdm-miR164e	307	476
74	MSTRG.35007.5	mdm-miR164e	211	380
75	MSTRG.35007.1	mdm-miR164e	307	476
76	MSTRG.35007.4	mdm-miR164e	218	387
77	MSTRG.35007.3	mdm-miR164f	218	387
78	MSTRG.35007.6	mdm-miR164f	185	354
79	MSTRG.35007.2	mdm-miR164f	307	476
80	MSTRG.35007.5	mdm-miR164f	211	380
81	MSTRG.35007.1	mdm-miR164f	307	476
82	MSTRG.35007.4	mdm-miR164f	218	387
83	MSTRG.57916.4	mdm-miR166a	272	446
84	MSTRG.57916.5	mdm-miR166a	259	433
85	MSTRG.57916.3	mdm-miR166a	281	455
86	MSTRG.57916.2	mdm-miR166a	297	471
87	MSTRG.50564.2	mdm-miR166d	378	544
88	MSTRG.42932.1	mdm-miR166e	101	197
89	MSTRG.42932.4	mdm-miR166e	1	84
90	MSTRG.42932.1	mdm-miR166f	102	191
91	MSTRG.42932.4	mdm-miR166f	45	78
92	MSTRG.57916.4	mdm-miR166g	272	446
93	MSTRG.57916.5	mdm-miR166g	259	433
94	MSTRG.57916.3	mdm-miR166g	281	455
95	MSTRG.57916.2	mdm-miR166g	297	471
96	MSTRG.50564.2	mdm-miR166h	378	540
97	MSTRG.42932.1	mdm-miR166i	101	197
98	MSTRG.42932.4	mdm-miR166i	1	84
99	MSTRG.101885.2	mdm-miR167f	75	311
100	MSTRG.101885.1	mdm-miR167f	75	311
101	MSTRG.101885.2	mdm-miR167g	118	284
102	MSTRG.101885.1	mdm-miR167g	118	284
103	MSTRG.71519.1	mdm-miR171a	1120	1034
104	MSTRG.71519.4	mdm-miR171a	857	771
105	MSTRG.71519.3	mdm-miR171a	931	845
106	MSTRG.71519.1	mdm-miR171b	1120	1030
107	MSTRG.71519.4	mdm-miR171b	857	767
108	MSTRG.71519.3	mdm-miR171b	931	841
109	MSTRG.141153.2	mdm-miR171b	3348	3262
110	MSTRG.141153.3	mdm-miR171b	3300	3214
111	MSTRG.141153.4	mdm-miR171b	1812	1726
112	MSTRG.71501.3	mdm-miR171f	1865	1764
113	MSTRG.13519.1	mdm-miR171i	2574	2420
114	MSTRG.58353.2	mdm-miR172d	610	742
115	MSTRG.10690.5	mdm-miR172d	593	724
116	MSTRG.10690.6	mdm-miR172d	593	724
117	MSTRG.10690.2	mdm-miR172d	606	737
118	MSTRG.10690.8	mdm-miR172d	1	76
119	MSTRG.58353.3	mdm-miR172d	590	619
120	MSTRG.10690.5	mdm-miR172e	593	724
121	MSTRG.10690.6	mdm-miR172e	593	724
122	MSTRG.10690.2	mdm-miR172e	606	737
123	MSTRG.58353.2	mdm-miR172e	610	742
124	MSTRG.10690.8	mdm-miR172e	1	76
125	MSTRG.58353.2	mdm-miR172f	610	742
126	MSTRG.10690.5	mdm-miR172f	593	724
127	MSTRG.10690.6	mdm-miR172f	593	724
128	MSTRG.10690.2	mdm-miR172f	606	737
129	MSTRG.10690.8	mdm-miR172f	1	76
130	MSTRG.58353.3	mdm-miR172f	590	619
131	MSTRG.24932.20	mdm-miR172g	5573	5469
132	MSTRG.24932.13	mdm-miR172g	7041	6937
133	MSTRG.24932.18	mdm-miR172g	5658	5554
134	MSTRG.24932.20	mdm-miR172h	5573	5469
135	MSTRG.24932.13	mdm-miR172h	7041	6937
136	MSTRG.24932.18	mdm-miR172h	5658	5554
137	MSTRG.88649.7	mdm-miR172i	2553	2373
138	MSTRG.88649.3	mdm-miR172i	1937	1757
139	MSTRG.88649.6	mdm-miR172i	1795	1615
140	MSTRG.88649.4	mdm-miR172i	2332	2152
141	MSTRG.88649.5	mdm-miR172i	2615	2435
142	MSTRG.88649.7	mdm-miR172j	2553	2373
143	MSTRG.88649.3	mdm-miR172j	1937	1757
144	MSTRG.88649.6	mdm-miR172j	1795	1615
145	MSTRG.88649.4	mdm-miR172j	2332	2152
146	MSTRG.88649.5	mdm-miR172j	2615	2435
147	MSTRG.88649.7	mdm-miR172k	2553	2373
148	MSTRG.88649.3	mdm-miR172k	1937	1757
149	MSTRG.88649.6	mdm-miR172k	1795	1615
150	MSTRG.88649.4	mdm-miR172k	2332	2152
151	MSTRG.88649.5	mdm-miR172k	2615	2435
152	MSTRG.88649.7	mdm-miR172l	2553	2373
153	MSTRG.88649.3	mdm-miR172l	1937	1757
154	MSTRG.88649.6	mdm-miR172l	1795	1615
155	MSTRG.88649.4	mdm-miR172l	2332	2152
156	MSTRG.88649.5	mdm-miR172l	2615	2435
157	MSTRG.60895.2	mdm-miR393a	896	778
158	MSTRG.12957.1	mdm-miR393a	738	610
159	MSTRG.12957.1	mdm-miR393b	739	609
160	MSTRG.60895.2	mdm-miR393b	897	777
161	MSTRG.12957.1	mdm-miR393c	739	609
162	MSTRG.60895.2	mdm-miR393c	897	777
163	MSTRG.104248.2	mdm-miR395d	736	600
164	MSTRG.104248.1	mdm-miR395d	723	587
165	MSTRG.132205.1	mdm-miR395g	27	93
166	MSTRG.132205.1	mdm-miR395i	27	93
167	MSTRG.26510.75	mdm-miR398b	143	240
168	MSTRG.26516.2	mdm-miR398b	1	90
169	MSTRG.26516.3	mdm-miR398b	1	83
170	MSTRG.26510.75	mdm-miR398c	141	241
171	MSTRG.26516.2	mdm-miR398c	1	91
172	MSTRG.26516.3	mdm-miR398c	1	84
173	MSTRG.103191.3	mdm-miR482b	1231	1126
174	MSTRG.103191.2	mdm-miR482b	2182	2077
175	MSTRG.103191.5	mdm-miR482c	2503	2363
176	MSTRG.103191.1	mdm-miR482c	3623	3483
177	MSTRG.103191.4	mdm-miR482c	3852	3712
178	MSTRG.41686.13	mdm-miR535a	1262	1356
179	MSTRG.81674.11	mdm-miR535a	1232	1320
180	MSTRG.41686.17	mdm-miR535b	1336	1430
181	MSTRG.41686.19	mdm-miR535b	1257	1351
182	MSTRG.41686.18	mdm-miR535b	1257	1351
183	MSTRG.81674.11	mdm-miR535b	1232	1321
184	MSTRG.41686.17	mdm-miR535c	1343	1425
185	MSTRG.41686.19	mdm-miR535c	1264	1346
186	MSTRG.41686.18	mdm-miR535c	1264	1346
187	MSTRG.81674.11	mdm-miR535c	1239	1321
188	MSTRG.81674.11	mdm-miR535d	1232	1326
189	MSTRG.41686.13	mdm-miR535d	1262	1350
190	MSTRG.41686.17	mdm-miR535d	1336	1425
191	MSTRG.41686.19	mdm-miR535d	1257	1346
192	MSTRG.41686.18	mdm-miR535d	1257	1346
193	MSTRG.13488.4	mdm-miR828b	517	386
194	MSTRG.13488.3	mdm-miR828b	1023	934
195	MSTRG.103191.3	mdm-miR482d	1231	1126
196	MSTRG.103191.2	mdm-miR482d	2182	2077
197	MSTRG.14422.1	mdm-miR7121a	180	325
198	MSTRG.14423.1	mdm-miR7121a	1	49
199	MSTRG.14422.1	mdm-miR7121b	180	338
200	MSTRG.14423.1	mdm-miR7121b	1	49
201	MSTRG.14412.4	mdm-miR7121d	1	63
202	MSTRG.14422.1	mdm-miR7121d	231	307
203	MSTRG.14412.4	mdm-miR7121e	1	63
204	MSTRG.14422.1	mdm-miR7121e	231	307
205	MSTRG.14422.1	mdm-miR7121f	209	296
206	MSTRG.14423.1	mdm-miR7121f	30	87
207	MSTRG.14412.4	mdm-miR7121f	1	52
208	MSTRG.14412.4	mdm-miR7121g	6	63
209	MSTRG.14412.4	mdm-miR7121h	1	63
210	MSTRG.14422.1	mdm-miR7121h	231	307
211	MSTRG.69942.2	mdm-miR5225c	135	253
212	MSTRG.139861.2	mdm-miR5225a	453	596
213	MSTRG.139861.1	mdm-miR5225a	1615	1758
214	MSTRG.139857.2	mdm-miR5225a	581	438
215	MSTRG.139861.2	mdm-miR5225b	453	596
216	MSTRG.139861.1	mdm-miR5225b	1615	1758
217	MSTRG.139857.2	mdm-miR5225b	581	438
218	MSTRG.11457.2	mdm-miR7126	126	276
219	MSTRG.12957.1	mdm-miR393d	739	609
220	MSTRG.60895.2	mdm-miR393d	897	777
221	MSTRG.12957.1	mdm-miR393e	739	609
222	MSTRG.60895.2	mdm-miR393e	897	777
223	MSTRG.60895.2	mdm-miR393f	896	778
224	MSTRG.12957.1	mdm-miR393f	738	610
225	MSTRG.102984.4	mdm-miR858	1607	686
226	MSTRG.102984.5	mdm-miR858	1494	573
227	MSTRG.102984.1	mdm-miR858	1555	634
