# Supplementary material for: Expression Profiles and Characteristics of Apple lncRNAs in Roots, Phloem, Leaves, Flowers, and Fruit
Source: Int J Mol Sci. 2022 May 25;23(11):5931. doi: 10.3390/ijms23115931 (PMC9180697; doi:10.3390/ijms23115931)
Supplement: Supplementary file 1 [file ijms-23-05931-s001.zip › Table S8.xlsx]

## Sheet: Sheet1
Table S8 Cis–target genes prediction for lncRNAs
No.	lncRNA_ID	Genes
1	MSTRG.35457.1	MD04G1185600;MD04G1184800;MD04G1186000;MD04G1184900;MD04G1186300;MD04G1186100;MD04G1185900;MD04G1184600;MD04G1184500;MD04G1185700;MD04G1184300;MD04G1184700;MD04G1184100;MD04G1184000;MD04G1186200;MD04G1184400;MD04G1185000;MD04G1185800;MD04G1185100
2	MSTRG.133482.2	MD16G1129200;MD16G1129600;MD16G1129700;MD16G1129800;MD16G1129300;MD16G1130300;MD16G1129900;MD16G1128400;MD16G1128500;MD16G1128900;MD16G1130100;MD16G1129000;MD16G1128300;MD16G1128700;MD16G1129500;MD16G1130000;MD16G1130200;MD16G1129400;MD16G1128800
3	MSTRG.50197.1	MD06G1103900;MD06G1103700;MD06G1103800;MD06G1103500;MD06G1103300;MD06G1104200;MD06G1103600;MD06G1104100;MD06G1104000;MD06G1103400
4	MSTRG.75928.2	MD09G1251900;MD09G1252900;MD09G1253300;MD09G1252000;MD09G1253200;MD09G1252100;MD09G1253400;MD09G1253500;MD09G1253000;MD09G1253800;MD09G1253700;MD09G1253600;MD09G1253100;MD09G1252200
5	MSTRG.134799.2	MD16G1174000;MD16G1174100;MD16G1174300;MD16G1174400;MD16G1173500;MD16G1174500;MD16G1173400;MD16G1173900;MD16G1173800;MD16G1173600
6	MSTRG.25772.1	MD03G1147700;MD03G1147600;MD03G1147800;MD03G1147300;MD03G1148000;MD03G1147400;MD03G1147500;MD03G1147200;MD03G1147900
7	MSTRG.1474.7	MD00G1045000;MD00G1045200;MD00G1045600;MD00G1045500;MD00G1045300;MD00G1045100;MD00G1045400
8	MSTRG.75381.1	MD09G1234600;MD09G1234000;MD09G1233500;MD09G1234800;MD09G1233400;MD09G1233700;MD09G1234100;MD09G1234500;MD09G1234300;MD09G1233800;MD09G1233900;MD09G1233600;MD09G1234200;MD09G1234400;MD09G1233300;MD09G1235000
9	MSTRG.109204.1	MD13G1249000;MD13G1249400;MD13G1250200;MD13G1250100;MD13G1249300;MD13G1249200;MD13G1250000;MD13G1250500;MD13G1248300;MD13G1248800;MD13G1249100;MD13G1249800;MD13G1250300;MD13G1249500;MD13G1249900;MD13G1249600;MD13G1248900
10	MSTRG.65172.8	MD08G1130100;MD08G1129000;MD08G1128800;MD08G1130000;MD08G1129600;MD08G1129100;MD08G1130400;MD08G1129300;MD08G1130200;MD08G1128900;MD08G1129900;MD08G1129200;MD08G1129500;MD08G1129800
11	MSTRG.25006.1	MD03G1125900;MD03G1125200;MD03G1125800;MD03G1125300;MD03G1126100;MD03G1125500;MD03G1126000;MD03G1125400;MD03G1125700;MD03G1126400;MD03G1125600;MD03G1126200;MD03G1126300
12	MSTRG.142193.3	MD17G1138500;MD17G1138000;MD17G1137200;MD17G1137100;MD17G1137300;MD17G1138300;MD17G1138200;MD17G1138700;MD17G1138800;MD17G1137700;MD17G1137600;MD17G1137500;MD17G1138600;MD17G1138100;MD17G1137000;MD17G1137400;MD17G1137800
13	MSTRG.56198.2	MD07G1108400;MD07G1108200;MD07G1108000;MD07G1107700;MD07G1107800;MD07G1107900;MD07G1108300
14	MSTRG.124190.1	MD15G1249000;MD15G1249600;MD15G1248400;MD15G1249500;MD15G1249400;MD15G1248300;MD15G1248800;MD15G1248700;MD15G1248600;MD15G1248200;MD15G1249200;MD15G1249300;MD15G1248500
15	MSTRG.4780.3	MD00G1137800;MD00G1137200;MD00G1138300;MD00G1138200;MD00G1138000;MD00G1137700;MD00G1137900;MD00G1137500;MD00G1137300
16	MSTRG.108039.1	MD13G1210400;MD13G1211000;MD13G1210200;MD13G1210900;MD13G1210800;MD13G1210300;MD13G1211100;MD13G1209900;MD13G1210600;MD13G1210000;MD13G1210100;MD13G1210700
17	MSTRG.114420.1	MD14G1116800;MD14G1116400;MD14G1117100;MD14G1116900;MD14G1116600;MD14G1117000;MD14G1116300;MD14G1116500;MD14G1116200
18	MSTRG.99779.1	MD12G1156700;MD12G1156300;MD12G1157200;MD12G1157900;MD12G1157800;MD12G1158100;MD12G1157100;MD12G1157300;MD12G1156400;MD12G1157600;MD12G1157700;MD12G1158000;MD12G1156600;MD12G1156500;MD12G1157000;MD12G1156800;MD12G1157400;MD12G1156900
19	MSTRG.125556.7	MD15G1295500;MD15G1296000;MD15G1297000;MD15G1297100;MD15G1296700;MD15G1296400;MD15G1296500;MD15G1295600;MD15G1295800;MD15G1296100;MD15G1296300;MD15G1295900
20	MSTRG.114169.14	MD14G1110200;MD14G1110400;MD14G1110700;MD14G1110300;MD14G1110500;MD14G1110600;MD14G1110000
21	MSTRG.25098.4	MD03G1129600;MD03G1129100;MD03G1128600;MD03G1128900;MD03G1128500;MD03G1128400;MD03G1129200;MD03G1128800;MD03G1129700;MD03G1128300;MD03G1129300;MD03G1128200;MD03G1129000
22	MSTRG.143296.2	MD17G1174200;MD17G1174000;MD17G1174300
23	MSTRG.144873.1	MD17G1222100;MD17G1221600;MD17G1221800;MD17G1221300;MD17G1220700;MD17G1221100;MD17G1220500;MD17G1221700;MD17G1222300;MD17G1221400;MD17G1220600;MD17G1221500;MD17G1221900;MD17G1222400;MD17G1220800;MD17G1221200;MD17G1222200;MD17G1220400
24	MSTRG.125473.1	MD15G1294400;MD15G1294300;MD15G1294200;MD15G1294100;MD15G1294600;MD15G1293900;MD15G1293800
25	MSTRG.49644.1	MD06G1086400;MD06G1086100;MD06G1086300;MD06G1085900;MD06G1086200;MD06G1086000;MD06G1085800
26	MSTRG.129453.1	MD15G1415600;MD15G1414400;MD15G1415700;MD15G1416100;MD15G1414600;MD15G1414300;MD15G1416200;MD15G1415800;MD15G1415900;MD15G1416000;MD15G1414500
27	MSTRG.102055.132	MD12G1247200;MD12G1247300;MD12G1249200;MD12G1249400;MD12G1248800;MD12G1249500;MD12G1247400;MD12G1249100;MD12G1246800;MD12G1249700;MD12G1248900;MD12G1249600;MD12G1247100;MD12G1250000;MD12G1249900;MD12G1247000;MD12G1246900;MD12G1249300;MD12G1247500;MD12G1249000
28	MSTRG.3953.5	MD00G1116200;MD00G1114800;MD00G1116000;MD00G1115300;MD00G1115200;MD00G1114900;MD00G1115500;MD00G1115800;MD00G1115900;MD00G1115600;MD00G1115000;MD00G1115100;MD00G1115400;MD00G1116100;MD00G1114700;MD00G1116300;MD00G1115700
29	MSTRG.25911.1	MD03G1150800;MD03G1151000;MD03G1150600;MD03G1151200;MD03G1150900;MD03G1150700;MD03G1151100
30	MSTRG.8672.2	MD01G1035800;MD01G1035400;MD01G1035500;MD01G1035200;MD01G1035100;MD01G1035300;MD01G1035600
31	MSTRG.56508.1	MD07G1116600;MD07G1117200;MD07G1116400;MD07G1117000;MD07G1116500;MD07G1116700;MD07G1117100
32	MSTRG.132199.2	MD16G1077400;MD16G1075700;MD16G1077200;MD16G1075900;MD16G1076100;MD16G1078000;MD16G1077500;MD16G1077700;MD16G1076400;MD16G1077900;MD16G1076300;MD16G1077600;MD16G1076200;MD16G1076000;MD16G1076600;MD16G1077800;MD16G1075600;MD16G1075800;MD16G1077300
33	MSTRG.122697.21	MD15G1193800;MD15G1194500;MD15G1194100;MD15G1195100;MD15G1193700;MD15G1193900;MD15G1194600;MD15G1195000;MD15G1194300;MD15G1193600;MD15G1194000;MD15G1194400
34	MSTRG.94172.3	MD11G1281500;MD11G1280800;MD11G1281400;MD11G1280300;MD11G1280600;MD11G1280400;MD11G1281000;MD11G1280900;MD11G1280500;MD11G1281300;MD11G1281800;MD11G1281200;MD11G1280200;MD11G1281700;MD11G1280700;MD11G1281600;MD11G1281100
35	MSTRG.14761.2	MD02G1038600;MD02G1038400;MD02G1039500;MD02G1039300;MD02G1039200;MD02G1040100;MD02G1038500;MD02G1038800;MD02G1039900;MD02G1038700;MD02G1039600;MD02G1038900;MD02G1039700;MD02G1038300;MD02G1039400;MD02G1040000;MD02G1039800
36	MSTRG.8288.26	MD01G1025500;MD01G1026100;MD01G1026400;MD01G1025400;MD01G1026000;MD01G1025600;MD01G1026300;MD01G1025800;MD01G1026200;MD01G1025900
37	MSTRG.71735.13	MD09G1118200;MD09G1117600;MD09G1118600;MD09G1119500;MD09G1118100;MD09G1118300;MD09G1117900;MD09G1119200;MD09G1117500;MD09G1118800;MD09G1118000;MD09G1119300;MD09G1119600;MD09G1119100;MD09G1118500;MD09G1117800;MD09G1117700;MD09G1118400;MD09G1118900;MD09G1119000;MD09G1119700;MD09G1119400
38	MSTRG.37726.1	MD05G1023700;MD05G1023800;MD05G1024900;MD05G1024000;MD05G1024100;MD05G1025000;MD05G1024200;MD05G1024300;MD05G1025100;MD05G1024800;MD05G1024400;MD05G1024500;MD05G1023900;MD05G1024600
39	MSTRG.144866.2	MD17G1220800;MD17G1221200;MD17G1221300;MD17G1221800;MD17G1221500;MD17G1220600;MD17G1221600;MD17G1221900;MD17G1220400;MD17G1221400;MD17G1221700;MD17G1220500;MD17G1220700;MD17G1221100
40	MSTRG.23534.1	MD03G1069500;MD03G1072000;MD03G1070900;MD03G1069400;MD03G1070300;MD03G1069200;MD03G1069800;MD03G1070800;MD03G1070400;MD03G1071400;MD03G1071200;MD03G1071800;MD03G1069900;MD03G1070700;MD03G1071000;MD03G1070200;MD03G1071500;MD03G1071900;MD03G1071300;MD03G1070100;MD03G1069600;MD03G1071600;MD03G1070000;MD03G1071100
41	MSTRG.94771.1	MD11G1306000;MD11G1306500;MD11G1305000;MD11G1305400;MD11G1305600;MD11G1306800;MD11G1305700;MD11G1305300;MD11G1304700;MD11G1305200;MD11G1307000;MD11G1306700;MD11G1306300;MD11G1304800;MD11G1304500;MD11G1305800;MD11G1306200;MD11G1304200;MD11G1306100;MD11G1304900;MD11G1306400;MD11G1304400;MD11G1304600;MD11G1305500;MD11G1305900;MD11G1306900;MD11G1305100;MD11G1304300;MD11G1306600
42	MSTRG.62216.1	MD08G1015200;MD08G1016100;MD08G1016900;MD08G1014700;MD08G1014900;MD08G1015300;MD08G1015500;MD08G1015800;MD08G1015900;MD08G1015000;MD08G1014800;MD08G1016400;MD08G1015600;MD08G1015700;MD08G1016200;MD08G1016600;MD08G1016000;MD08G1015100;MD08G1016500
43	MSTRG.138253.1	MD16G1273400;MD16G1273100;MD16G1273000
44	MSTRG.26496.1	MD03G1166800;MD03G1167000;MD03G1166600;MD03G1166400;MD03G1166900;MD03G1166700;MD03G1166300;MD03G1166500
45	MSTRG.125673.1	MD15G1300300;MD15G1300200
46	MSTRG.60220.1	MD07G1244700;MD07G1244500;MD07G1242900;MD07G1244100;MD07G1242700;MD07G1244000;MD07G1243500;MD07G1243800;MD07G1242500;MD07G1242000;MD07G1243600;MD07G1242400;MD07G1243100;MD07G1243300;MD07G1242300;MD07G1243700;MD07G1243900;MD07G1243400;MD07G1243000;MD07G1244600;MD07G1242100;MD07G1244300;MD07G1244200
47	MSTRG.7368.4	MD00G1220400;MD00G1220200;MD00G1220600;MD00G1220300;MD00G1220700;MD00G1220500;MD00G1220000
48	MSTRG.988.1	MD00G1031900;MD00G1031700;MD00G1032200;MD00G1031600;MD00G1031800
49	MSTRG.135190.34	MD16G1187800;MD16G1187400;MD16G1187700;MD16G1188400;MD16G1187600;MD16G1187000;MD16G1188100;MD16G1188200;MD16G1188300;MD16G1187300;MD16G1188000;MD16G1187900;MD16G1187100;MD16G1188500;MD16G1187200
50	MSTRG.5128.7	MD00G1146900;MD00G1147700;MD00G1147100;MD00G1147300;MD00G1147000;MD00G1147200;MD00G1147600;MD00G1147800
51	MSTRG.120967.2	MD15G1128900;MD15G1130200;MD15G1131200;MD15G1129500;MD15G1129700;MD15G1130700;MD15G1129200;MD15G1130100;MD15G1128700;MD15G1128500;MD15G1129900;MD15G1131000;MD15G1128400;MD15G1128300;MD15G1128800;MD15G1129300;MD15G1130300;MD15G1129800;MD15G1130000;MD15G1130800;MD15G1130900;MD15G1129100;MD15G1131100;MD15G1128200;MD15G1129000;MD15G1130500;MD15G1129400;MD15G1128600
52	MSTRG.8288.14	MD01G1026100;MD01G1026400;MD01G1025500;MD01G1026000;MD01G1025600;MD01G1026300;MD01G1025800;MD01G1025900;MD01G1026200;MD01G1025400
53	MSTRG.129783.2	MD15G1428100;MD15G1428600;MD15G1427600;MD15G1427300;MD15G1427200;MD15G1428000;MD15G1426900;MD15G1427500;MD15G1427700;MD15G1427100;MD15G1428400;MD15G1428700;MD15G1428200;MD15G1427000;MD15G1427400;MD15G1428800;MD15G1428300;MD15G1427800;MD15G1428500
54	MSTRG.49367.1	MD06G1078700;MD06G1079100;MD06G1079000;MD06G1078600;MD06G1079300;MD06G1079400;MD06G1079200;MD06G1079700;MD06G1079900;MD06G1079800;MD06G1078800
55	MSTRG.56486.1	MD07G1116300;MD07G1116200;MD07G1116100;MD07G1115900;MD07G1115800
56	MSTRG.47353.1	MD06G1018200;MD06G1019200;MD06G1020300;MD06G1019100;MD06G1019000;MD06G1018300;MD06G1019800;MD06G1020100;MD06G1019500;MD06G1018800;MD06G1018400;MD06G1020200;MD06G1020400;MD06G1019300;MD06G1020000;MD06G1018900;MD06G1018700
57	MSTRG.140886.38	MD17G1087300;MD17G1086600;MD17G1087100;MD17G1089100;MD17G1087500;MD17G1088500;MD17G1088600;MD17G1087000;MD17G1087800;MD17G1089000;MD17G1087400;MD17G1087200;MD17G1088400;MD17G1088100;MD17G1087600;MD17G1086700;MD17G1087900;MD17G1088300;MD17G1088800;MD17G1087700;MD17G1089200;MD17G1088000;MD17G1088900;MD17G1088700
58	MSTRG.140600.1	MD17G1076300;MD17G1075200;MD17G1075600;MD17G1075900;MD17G1076200;MD17G1075700;MD17G1075300;MD17G1075800;MD17G1076100;MD17G1076700;MD17G1075400;MD17G1076000
59	MSTRG.129205.1	MD15G1405200;MD15G1405300;MD15G1403900;MD15G1404200;MD15G1404600;MD15G1403500;MD15G1404000;MD15G1403700;MD15G1405400;MD15G1404800;MD15G1404500;MD15G1403800;MD15G1405000;MD15G1404700;MD15G1403600;MD15G1405500;MD15G1404900;MD15G1404300;MD15G1405100;MD15G1404100
60	MSTRG.133103.3	MD16G1114800;MD16G1114300;MD16G1114600;MD16G1114400;MD16G1113500;MD16G1114900;MD16G1113800;MD16G1113600;MD16G1115000;MD16G1113700
61	MSTRG.100194.5	MD12G1173900;MD12G1174600;MD12G1173700;MD12G1174300;MD12G1174500;MD12G1174800;MD12G1173600;MD12G1173400;MD12G1174000;MD12G1173500;MD12G1173800;MD12G1174400;MD12G1174900;MD12G1174100;MD12G1174700
62	MSTRG.102071.2	MD12G1248500;MD12G1249500;MD12G1248600;MD12G1249400;MD12G1249200;MD12G1248800;MD12G1249700;MD12G1248900;MD12G1249600;MD12G1249100;MD12G1248000;MD12G1248300;MD12G1248100;MD12G1250000;MD12G1249900;MD12G1249300;MD12G1249000;MD12G1248200
63	MSTRG.84453.14	MD10G1256200;MD10G1255900;MD10G1256700;MD10G1257800;MD10G1257300;MD10G1257600;MD10G1256000;MD10G1255600;MD10G1256800;MD10G1256300;MD10G1256600;MD10G1256900;MD10G1255800;MD10G1255700;MD10G1257000;MD10G1257700;MD10G1256400;MD10G1257500;MD10G1256100
64	MSTRG.26862.2	MD03G1176900;MD03G1177300;MD03G1176800;MD03G1177000;MD03G1177200;MD03G1177500;MD03G1177400
65	MSTRG.44388.2	MD05G1262200;MD05G1262000;MD05G1259400;MD05G1259100;MD05G1259600;MD05G1259800;MD05G1260400;MD05G1261500;MD05G1259200;MD05G1260600;MD05G1261900;MD05G1259500;MD05G1260300;MD05G1261200;MD05G1261800;MD05G1260200;MD05G1259900;MD05G1260100;MD05G1261300;MD05G1261100;MD05G1260500;MD05G1259300;MD05G1260000;MD05G1262100
66	MSTRG.144005.2	MD17G1192400;MD17G1192800;MD17G1192900;MD17G1192500
67	MSTRG.14595.1	MD02G1033100;MD02G1032300;MD02G1032800;MD02G1032100;MD02G1033000;MD02G1033400;MD02G1032600;MD02G1032700;MD02G1032400;MD02G1031600;MD02G1032200;MD02G1033500;MD02G1031900;MD02G1032900;MD02G1031200;MD02G1032000;MD02G1031400;MD02G1030900;MD02G1032500;MD02G1031800;MD02G1031700;MD02G1031100;MD02G1031500;MD02G1033200
68	MSTRG.38064.3	MD05G1033900;MD05G1032800;MD05G1034200;MD05G1033300;MD05G1034000;MD05G1032900;MD05G1034300;MD05G1034100;MD05G1033400;MD05G1033100;MD05G1033000;MD05G1033800;MD05G1033700;MD05G1033200
69	MSTRG.106582.1	MD13G1165500;MD13G1165600;MD13G1165200;MD13G1165700;MD13G1165300;MD13G1165800;MD13G1166000;MD13G1166100;MD13G1165900;MD13G1165400
70	MSTRG.7444.1	MD01G1001200;MD01G1000900;MD01G1001000
71	MSTRG.76048.6	MD09G1257300;MD09G1258300;MD09G1258100;MD09G1257600;MD09G1257800;MD09G1256600;MD09G1256800;MD09G1257200;MD09G1257100;MD09G1257000;MD09G1258000;MD09G1258200;MD09G1257900;MD09G1256700;MD09G1257400;MD09G1258400
72	MSTRG.26317.6	MD03G1162900;MD03G1162400;MD03G1162300;MD03G1162700;MD03G1162800;MD03G1162200
73	MSTRG.139818.1	MD17G1042300;MD17G1043400;MD17G1042500;MD17G1042400;MD17G1044200;MD17G1044100;MD17G1042100;MD17G1045400;MD17G1042600;MD17G1043500;MD17G1044400;MD17G1044500;MD17G1044300;MD17G1042200;MD17G1044000;MD17G1044700;MD17G1045300;MD17G1044600;MD17G1043300;MD17G1042800;MD17G1043700;MD17G1044800;MD17G1043600;MD17G1042000
74	MSTRG.29923.8	MD03G1295600;MD03G1293600;MD03G1295800;MD03G1296000;MD03G1295900;MD03G1295300;MD03G1295400;MD03G1294600;MD03G1293400;MD03G1293300;MD03G1293200;MD03G1294200;MD03G1294400;MD03G1294300;MD03G1294100;MD03G1293700;MD03G1295200;MD03G1293800;MD03G1295700;MD03G1293900;MD03G1293100;MD03G1294700;MD03G1294500;MD03G1296200;MD03G1294800;MD03G1295100;MD03G1296100
75	MSTRG.29938.1	MD03G1296100;MD03G1296200;MD03G1294500;MD03G1295100;MD03G1294800;MD03G1296400;MD03G1294700;MD03G1296300;MD03G1294900;MD03G1295700;MD03G1294100;MD03G1295200;MD03G1294400;MD03G1294300;MD03G1294200;MD03G1295900;MD03G1296000;MD03G1294600;MD03G1295400;MD03G1295300;MD03G1295800;MD03G1295600
76	MSTRG.55038.3	MD07G1062700;MD07G1062200;MD07G1063100;MD07G1062500;MD07G1064500;MD07G1063700;MD07G1063500;MD07G1064200;MD07G1062400;MD07G1064100;MD07G1063300;MD07G1063000;MD07G1063400;MD07G1064400;MD07G1064000;MD07G1063900;MD07G1063200;MD07G1064300;MD07G1063600;MD07G1062300;MD07G1062900;MD07G1062600;MD07G1063800
77	MSTRG.108834.3	MD13G1237500;MD13G1236800;MD13G1238400;MD13G1237400;MD13G1238300;MD13G1236900;MD13G1237200;MD13G1237000;MD13G1237300
78	MSTRG.42263.1	MD05G1178800;MD05G1179500;MD05G1179200;MD05G1179300;MD05G1179700;MD05G1179600;MD05G1179400;MD05G1179000;MD05G1179100
79	MSTRG.68310.1	MD08G1226700;MD08G1226100;MD08G1225900;MD08G1226300;MD08G1227100;MD08G1227300;MD08G1227700;MD08G1226000;MD08G1225700;MD08G1225500;MD08G1226500;MD08G1227000;MD08G1227400;MD08G1226200;MD08G1226600;MD08G1225800;MD08G1227500;MD08G1226900;MD08G1226400;MD08G1225600;MD08G1225400;MD08G1227600;MD08G1227200
80	MSTRG.122684.1	MD15G1193700;MD15G1192900;MD15G1194500;MD15G1193500;MD15G1194400;MD15G1193100;MD15G1193600;MD15G1194600;MD15G1193400;MD15G1194100;MD15G1193800;MD15G1194000;MD15G1194200;MD15G1194300;MD15G1193000;MD15G1193900
81	MSTRG.4869.1	MD00G1140100;MD00G1140000;MD00G1139900
82	MSTRG.144806.2	MD17G1219700;MD17G1219000;MD17G1218600;MD17G1219500;MD17G1219300;MD17G1218500;MD17G1218700;MD17G1219400;MD17G1219600;MD17G1219100;MD17G1218900;MD17G1218800
83	MSTRG.100194.6	MD12G1174500;MD12G1174300;MD12G1173700;MD12G1173900;MD12G1174600;MD12G1174100;MD12G1174700;MD12G1174900;MD12G1173800;MD12G1174400;MD12G1174000;MD12G1173400;MD12G1173500;MD12G1174800;MD12G1173600
84	MSTRG.5979.1	MD00G1170100;MD00G1169700;MD00G1169900;MD00G1169800;MD00G1170000
85	MSTRG.48396.1	MD06G1052200;MD06G1052300;MD06G1052100
86	MSTRG.106047.15	MD13G1144000;MD13G1145100;MD13G1144700;MD13G1143400;MD13G1144600;MD13G1144200;MD13G1144500;MD13G1143900;MD13G1143800;MD13G1145600;MD13G1145200;MD13G1144100;MD13G1144900;MD13G1143500;MD13G1143600;MD13G1144300;MD13G1143700;MD13G1145500;MD13G1145000
87	MSTRG.109568.2	MD13G1258200;MD13G1258100;MD13G1257900
88	MSTRG.9011.3	MD01G1044000;MD01G1043200;MD01G1043400;MD01G1044100;MD01G1043500;MD01G1043300;MD01G1044200;MD01G1043900
89	MSTRG.14989.187	MD02G1051000;MD02G1050800;MD02G1052000;MD02G1050900;MD02G1051700;MD02G1050700;MD02G1056500;MD02G1051200;MD02G1056800;MD02G1051300;MD02G1056200;MD02G1056400;MD02G1052100;MD02G1051900;MD02G1051400;MD02G1056700;MD02G1050600;MD02G1057100;MD02G1051800;MD02G1056600;MD02G1051100;MD02G1056300;MD02G1056100
90	MSTRG.1096.1	MD00G1034600;MD00G1034900;MD00G1034700;MD00G1035000;MD00G1034800;MD00G1034500
91	MSTRG.71840.2	MD09G1122800;MD09G1123400;MD09G1122400;MD09G1122000;MD09G1121900;MD09G1122300;MD09G1121600;MD09G1123300;MD09G1122500;MD09G1122200;MD09G1123100;MD09G1122100;MD09G1122600;MD09G1123600;MD09G1122700;MD09G1123200;MD09G1122900;MD09G1123700;MD09G1121700;MD09G1121500;MD09G1123500;MD09G1121800;MD09G1123800
92	MSTRG.41529.5	MD05G1144000;MD05G1145100;MD05G1144700;MD05G1144800;MD05G1144400;MD05G1143700;MD05G1143500;MD05G1144200;MD05G1144600;MD05G1144100;MD05G1145000;MD05G1144500;MD05G1144900
93	MSTRG.24104.3	MD03G1093900;MD03G1094000;MD03G1094400;MD03G1093800;MD03G1094500;MD03G1094200;MD03G1093400;MD03G1093500;MD03G1093300;MD03G1093600;MD03G1094600
94	MSTRG.112049.1	MD14G1043500;MD14G1044300;MD14G1044700;MD14G1043700;MD14G1042900;MD14G1043600;MD14G1043800;MD14G1044000;MD14G1044400;MD14G1044500;MD14G1042500;MD14G1043000;MD14G1043400;MD14G1042600;MD14G1044100;MD14G1043900;MD14G1043300;MD14G1043200
95	MSTRG.40777.1	MD05G1117300;MD05G1117200;MD05G1116200;MD05G1116400;MD05G1116600;MD05G1116800;MD05G1117700;MD05G1117800;MD05G1117500;MD05G1117600;MD05G1116500;MD05G1116900;MD05G1117100;MD05G1116000;MD05G1117000;MD05G1117400
96	MSTRG.9870.2	MD01G1073600;MD01G1073700;MD01G1074300;MD01G1074600;MD01G1073800;MD01G1074000;MD01G1074700;MD01G1074500;MD01G1074400;MD01G1073900
97	MSTRG.87509.1	MD11G1041900;MD11G1042600;MD11G1042900;MD11G1042500;MD11G1041800;MD11G1042300;MD11G1042000;MD11G1041400;MD11G1042100;MD11G1042800;MD11G1041500;MD11G1041700;MD11G1040800;MD11G1042700;MD11G1041600;MD11G1043000;MD11G1041100;MD11G1040900;MD11G1042400;MD11G1042200;MD11G1041300
98	MSTRG.9118.2	MD01G1046500;MD01G1046100;MD01G1046200;MD01G1046800;MD01G1046000;MD01G1045900;MD01G1046700;MD01G1046300;MD01G1046600
99	MSTRG.21296.1	MD02G1290000;MD02G1290700;MD02G1291100;MD02G1290500;MD02G1290200;MD02G1289800;MD02G1289300;MD02G1291000;MD02G1291400;MD02G1290100;MD02G1290800;MD02G1289900;MD02G1291300;MD02G1289400;MD02G1290900;MD02G1289200;MD02G1290400;MD02G1290600;MD02G1289500;MD02G1290300;MD02G1289600;MD02G1289100;MD02G1291200
100	MSTRG.110423.12	MD13G1277200;MD13G1276400;MD13G1277100;MD13G1276600;MD13G1276300;MD13G1277300;MD13G1276500
101	MSTRG.42991.1	MD05G1206500;MD05G1207000;MD05G1206300;MD05G1206000;MD05G1206400;MD05G1205500;MD05G1204800;MD05G1205300;MD05G1205700;MD05G1204900;MD05G1205100;MD05G1205200;MD05G1206700;MD05G1205900;MD05G1206900;MD05G1206600;MD05G1205000;MD05G1206800;MD05G1205800;MD05G1205400;MD05G1205600
102	MSTRG.12497.18	MD01G1181100;MD01G1181700;MD01G1181900;MD01G1180200;MD01G1182300;MD01G1180400;MD01G1182400;MD01G1180300;MD01G1181000;MD01G1182700;MD01G1181600;MD01G1179900;MD01G1182100;MD01G1180700;MD01G1182600;MD01G1182800;MD01G1181300;MD01G1182500;MD01G1179800;MD01G1180800;MD01G1180100;MD01G1180600;MD01G1182000;MD01G1182200;MD01G1181200;MD01G1180000;MD01G1180900;MD01G1180500;MD01G1181800
103	MSTRG.74086.1	MD09G1202700;MD09G1202200;MD09G1202500;MD09G1202800;MD09G1202900;MD09G1202300;MD09G1202600;MD09G1202400
104	MSTRG.5893.1	MD00G1166700;MD00G1166800;MD00G1167000;MD00G1166900
105	MSTRG.81799.2	MD10G1154100;MD10G1152800;MD10G1152600;MD10G1153100;MD10G1153600;MD10G1153900;MD10G1153300;MD10G1153400;MD10G1153700;MD10G1152500;MD10G1153500;MD10G1154000;MD10G1152700;MD10G1153800
106	MSTRG.97431.2	MD12G1086700;MD12G1086500;MD12G1086900;MD12G1085800;MD12G1086600;MD12G1086000;MD12G1086800;MD12G1085900;MD12G1087100;MD12G1085600;MD12G1086100;MD12G1086300;MD12G1087000;MD12G1086200
107	MSTRG.73551.2	MD09G1186700;MD09G1187200;MD09G1186500;MD09G1186800;MD09G1187300;MD09G1187000;MD09G1186900;MD09G1187400;MD09G1187600;MD09G1187500
108	MSTRG.58857.20	MD07G1186200;MD07G1186100;MD07G1185300;MD07G1185000;MD07G1186400;MD07G1186500;MD07G1184900;MD07G1185800;MD07G1185600;MD07G1184700;MD07G1184800;MD07G1185900;MD07G1185500;MD07G1186000;MD07G1186600;MD07G1185400;MD07G1186300
109	MSTRG.1494.1	MD00G1045700;MD00G1045900;MD00G1046000
110	MSTRG.22975.5	MD03G1044200;MD03G1044100;MD03G1045200;MD03G1044600;MD03G1044300;MD03G1045400;MD03G1044400;MD03G1045100;MD03G1045000;MD03G1045500;MD03G1045700;MD03G1044000;MD03G1045600;MD03G1044900;MD03G1044500
111	MSTRG.127788.2	MD15G1361400;MD15G1361100;MD15G1360900;MD15G1361000;MD15G1361200;MD15G1360500;MD15G1360600;MD15G1361600;MD15G1361300;MD15G1361700
112	MSTRG.83698.10	MD10G1224300;MD10G1224500;MD10G1221200;MD10G1224800;MD10G1225000;MD10G1221600;MD10G1223800;MD10G1224100;MD10G1224000;MD10G1223700;MD10G1223900;MD10G1221800;MD10G1221400;MD10G1221500;MD10G1224200;MD10G1221300;MD10G1224400;MD10G1221900;MD10G1222000
113	MSTRG.14989.372	MD02G1054300;MD02G1053900;MD02G1055600;MD02G1054900;MD02G1053500;MD02G1053200;MD02G1055500;MD02G1054200;MD02G1053400;MD02G1054000;MD02G1055300;MD02G1055400;MD02G1054700;MD02G1054100;MD02G1054500;MD02G1055900;MD02G1055800;MD02G1055700;MD02G1054400;MD02G1053600;MD02G1056000;MD02G1055200;MD02G1053300
114	MSTRG.101885.1	MD12G1240700;MD12G1241100;MD12G1239100;MD12G1239800;MD12G1241000;MD12G1240900;MD12G1239300;MD12G1238800;MD12G1239600;MD12G1238900;MD12G1241600;MD12G1238700;MD12G1240300;MD12G1240600;MD12G1241500;MD12G1241800;MD12G1239200;MD12G1241200;MD12G1241700;MD12G1241900;MD12G1240100;MD12G1242000;MD12G1240000;MD12G1239000;MD12G1241300;MD12G1240800;MD12G1240400;MD12G1239400;MD12G1239500
115	MSTRG.109464.2	MD13G1256800;MD13G1256700
116	MSTRG.76664.1	MD09G1281500;MD09G1282900;MD09G1282600;MD09G1282100;MD09G1281600;MD09G1281700;MD09G1282200;MD09G1282000;MD09G1281800;MD09G1281200;MD09G1281400;MD09G1281100;MD09G1282700;MD09G1281300;MD09G1282500;MD09G1281000;MD09G1281900;MD09G1282400
117	MSTRG.76186.4	MD09G1261500;MD09G1261900;MD09G1260900;MD09G1261000;MD09G1261100;MD09G1261600;MD09G1261200;MD09G1261400;MD09G1260700;MD09G1260800;MD09G1260600;MD09G1260500;MD09G1261800;MD09G1261700
118	MSTRG.63821.2	MD08G1078700;MD08G1078600;MD08G1079900;MD08G1079400;MD08G1079500;MD08G1079600;MD08G1080300;MD08G1079300;MD08G1079700;MD08G1078900;MD08G1080200;MD08G1079100;MD08G1078500;MD08G1079800;MD08G1078800;MD08G1080000;MD08G1078300
119	MSTRG.143305.1	MD17G1174200;MD17G1174000
120	MSTRG.90935.1	MD11G1178600;MD11G1178900;MD11G1178700;MD11G1178500;MD11G1178800;MD11G1179300
121	MSTRG.89685.2	MD11G1143500;MD11G1143000;MD11G1143600;MD11G1143100;MD11G1142000;MD11G1142500;MD11G1144100;MD11G1141700;MD11G1142100;MD11G1144600;MD11G1144300;MD11G1144200;MD11G1142400;MD11G1141500;MD11G1143400;MD11G1144400;MD11G1143700;MD11G1144500;MD11G1141900;MD11G1142900;MD11G1141800;MD11G1142300;MD11G1142200;MD11G1142800;MD11G1143200;MD11G1143800;MD11G1143300
122	MSTRG.99548.10	MD12G1147300;MD12G1148000;MD12G1147400;MD12G1147500;MD12G1147100;MD12G1147200;MD12G1147900;MD12G1147000;MD12G1147700
123	MSTRG.135869.3	MD16G1211800;MD16G1211600;MD16G1212000;MD16G1210600;MD16G1211400;MD16G1212100;MD16G1211000;MD16G1211700;MD16G1211900;MD16G1210400;MD16G1210800;MD16G1211500;MD16G1210300
124	MSTRG.18483.1	MD02G1191100;MD02G1190900;MD02G1191400;MD02G1191000;MD02G1191600
125	MSTRG.60015.1	MD07G1232900;MD07G1232500;MD07G1231800;MD07G1234300;MD07G1233600;MD07G1231900;MD07G1233700;MD07G1232000;MD07G1233200;MD07G1232700;MD07G1232100;MD07G1234000;MD07G1232600;MD07G1234200;MD07G1233900;MD07G1233800;MD07G1233300;MD07G1231600;MD07G1232400;MD07G1233000;MD07G1232300;MD07G1234400;MD07G1234100;MD07G1231700;MD07G1233100;MD07G1233500;MD07G1232800;MD07G1232200;MD07G1233400
126	MSTRG.77901.1	MD10G1032600;MD10G1033900;MD10G1032700;MD10G1033300;MD10G1033600;MD10G1033400;MD10G1033100;MD10G1032800;MD10G1033700;MD10G1033800;MD10G1034000;MD10G1033200;MD10G1032900;MD10G1033000
127	MSTRG.90581.8	MD11G1170400;MD11G1170800;MD11G1170300;MD11G1170900;MD11G1170200
128	MSTRG.127319.17	MD15G1348700;MD15G1348600;MD15G1349400;MD15G1349000;MD15G1349300;MD15G1349100;MD15G1348300;MD15G1348400;MD15G1349200
129	MSTRG.37965.34	MD05G1030500;MD05G1031200;MD05G1030400;MD05G1030700;MD05G1030800;MD05G1031100;MD05G1030300;MD05G1030200;MD05G1030600
130	MSTRG.45916.2	MD05G1327500;MD05G1328000;MD05G1327000;MD05G1327200;MD05G1326500;MD05G1328100;MD05G1328600;MD05G1326600;MD05G1328200;MD05G1328400;MD05G1327800;MD05G1328700;MD05G1326900;MD05G1326100;MD05G1327700;MD05G1326300;MD05G1327600;MD05G1326700;MD05G1326400;MD05G1326200;MD05G1328500;MD05G1328300;MD05G1327100;MD05G1327900
131	MSTRG.107507.1	MD13G1194700;MD13G1194900;MD13G1194400;MD13G1194500;MD13G1195000;MD13G1194800;MD13G1194600;MD13G1195200;MD13G1195300;MD13G1195100;MD13G1193900;MD13G1194100;MD13G1195400;MD13G1194200;MD13G1194000
132	MSTRG.99548.18	MD12G1147700;MD12G1147000;MD12G1147900;MD12G1147200;MD12G1147100;MD12G1147500;MD12G1147400;MD12G1148000;MD12G1147300
133	MSTRG.110915.4	MD14G1000100;MD14G1000600;MD14G1000700;MD14G1000500;MD14G1000200;MD14G1000800
134	MSTRG.56473.3	MD07G1115800;MD07G1115900;MD07G1115200;MD07G1115300;MD07G1115500;MD07G1115400;MD07G1115700;MD07G1115600
135	MSTRG.86793.5	MD11G1005500;MD11G1007400;MD11G1007300;MD11G1006200;MD11G1005300;MD11G1005400;MD11G1005200;MD11G1005800;MD11G1006800;MD11G1006700;MD11G1007200;MD11G1006100;MD11G1006900;MD11G1006500;MD11G1006600;MD11G1006400;MD11G1007500;MD11G1007000;MD11G1005700;MD11G1006300;MD11G1005600;MD11G1007100
136	MSTRG.64559.13	MD08G1108300;MD08G1109100;MD08G1108600;MD08G1108700;MD08G1107700;MD08G1109500;MD08G1108000;MD08G1108100;MD08G1108800;MD08G1107900;MD08G1108500;MD08G1107600;MD08G1109000;MD08G1108900;MD08G1109200;MD08G1109300;MD08G1108400;MD08G1107800
137	MSTRG.24817.1	MD03G1120400;MD03G1120200;MD03G1120700;MD03G1120600;MD03G1120300;MD03G1120500;MD03G1120800
138	MSTRG.86315.9	MD10G1330900;MD10G1331200;MD10G1329400;MD10G1331700;MD10G1332100;MD10G1331100;MD10G1329500;MD10G1330800;MD10G1330300;MD10G1329300;MD10G1328900;MD10G1329100;MD10G1329900;MD10G1331600;MD10G1331900;MD10G1330700;MD10G1332000;MD10G1328800;MD10G1329700;MD10G1331300;MD10G1330200;MD10G1330600;MD10G1329800;MD10G1331400;MD10G1328600;MD10G1330400;MD10G1332200;MD10G1329200;MD10G1329000;MD10G1331800;MD10G1331…
139	MSTRG.41811.1	MD05G1161000;MD05G1161100;MD05G1161400;MD05G1161600;MD05G1160000;MD05G1160700;MD05G1160300;MD05G1160200;MD05G1161300;MD05G1161500;MD05G1160400;MD05G1160100;MD05G1160500;MD05G1160900;MD05G1161200;MD05G1161700
140	MSTRG.87549.10	MD11G1043500;MD11G1043200;MD11G1042500;MD11G1042900;MD11G1043400;MD11G1042600;MD11G1042100;MD11G1042800;MD11G1042000;MD11G1042300;MD11G1042200;MD11G1042400;MD11G1043600;MD11G1043000;MD11G1043100;MD11G1043300;MD11G1042700
141	MSTRG.89750.4	MD11G1145400;MD11G1145200;MD11G1145300
142	MSTRG.60350.1	MD07G1249400;MD07G1249900;MD07G1251900;MD07G1249000;MD07G1251300;MD07G1250700;MD07G1250600;MD07G1249800;MD07G1250800;MD07G1250400;MD07G1249500;MD07G1250200;MD07G1250100;MD07G1249700;MD07G1251400;MD07G1251500;MD07G1250500;MD07G1251000;MD07G1249100;MD07G1251100;MD07G1249600;MD07G1251700;MD07G1248900;MD07G1249300;MD07G1251600;MD07G1250900;MD07G1248800;MD07G1249200;MD07G1251800;MD07G1251200;MD07G1250…
143	MSTRG.49080.1	MD06G1070900;MD06G1071300;MD06G1071100;MD06G1070800;MD06G1071200;MD06G1071000;MD06G1071400
144	MSTRG.23339.4	MD03G1061600;MD03G1062000;MD03G1061400;MD03G1060600;MD03G1060100;MD03G1062100;MD03G1062600;MD03G1062400;MD03G1060400;MD03G1060500;MD03G1061200;MD03G1061000;MD03G1061300;MD03G1062300;MD03G1062500;MD03G1060700;MD03G1062200;MD03G1060300;MD03G1060900;MD03G1059900;MD03G1060200
145	MSTRG.18672.5	MD02G1195400;MD02G1196400;MD02G1195800;MD02G1195500;MD02G1195700;MD02G1196200;MD02G1195600;MD02G1196300;MD02G1196100;MD02G1196000;MD02G1195200;MD02G1195900;MD02G1195300
146	MSTRG.29594.7	MD03G1281500;MD03G1280600;MD03G1282700;MD03G1281400;MD03G1283000;MD03G1280200;MD03G1282300;MD03G1282900;MD03G1281700;MD03G1281100;MD03G1281800;MD03G1281200;MD03G1281300;MD03G1282400;MD03G1280100;MD03G1280900;MD03G1281600;MD03G1281900;MD03G1282600;MD03G1282200;MD03G1282100;MD03G1281000;MD03G1280800;MD03G1280500;MD03G1280000;MD03G1280400;MD03G1282800;MD03G1282000;MD03G1280700;MD03G1280300
147	MSTRG.143161.1	MD17G1170000;MD17G1169600;MD17G1169900;MD17G1170100;MD17G1169700;MD17G1170300;MD17G1169500
148	MSTRG.115554.3	MD14G1154500;MD14G1153600;MD14G1154600;MD14G1155500;MD14G1155200;MD14G1155400;MD14G1155100;MD14G1153700;MD14G1153800;MD14G1154700;MD14G1154400;MD14G1154900
149	MSTRG.26862.1	MD03G1177000;MD03G1176800;MD03G1177300;MD03G1176900;MD03G1177200;MD03G1177400;MD03G1177500
150	MSTRG.132697.1	MD16G1098700;MD16G1099400;MD16G1100000;MD16G1097700;MD16G1098200;MD16G1099500;MD16G1100100;MD16G1099000;MD16G1100500;MD16G1098500;MD16G1099100;MD16G1099700;MD16G1100400;MD16G1100800;MD16G1098000;MD16G1100200;MD16G1100900;MD16G1097900;MD16G1099600;MD16G1097600;MD16G1099800;MD16G1098900;MD16G1100600;MD16G1097500;MD16G1097300;MD16G1098800;MD16G1097800;MD16G1098100;MD16G1098300;MD16G1098400;MD16G1101…
151	MSTRG.46119.2	MD05G1336300;MD05G1338100;MD05G1335900;MD05G1338500;MD05G1336800;MD05G1338000;MD05G1339000;MD05G1337700;MD05G1335800;MD05G1337000;MD05G1336500;MD05G1339200;MD05G1335700;MD05G1336200;MD05G1336400;MD05G1338200;MD05G1336700;MD05G1338600;MD05G1339100;MD05G1336000;MD05G1338300;MD05G1336900;MD05G1337300;MD05G1336100;MD05G1338700;MD05G1337200;MD05G1337100;MD05G1338900;MD05G1337400;MD05G1338800;MD05G1337…
152	MSTRG.91673.2	MD11G1196700;MD11G1197100;MD11G1197000;MD11G1197500;MD11G1197200;MD11G1197400;MD11G1196800;MD11G1197600
153	MSTRG.116987.1	MD14G1215100;MD14G1215400;MD14G1215700;MD14G1214000;MD14G1216800;MD14G1216600;MD14G1214300;MD14G1215600;MD14G1214400;MD14G1215200;MD14G1214800;MD14G1215300;MD14G1216500;MD14G1216000;MD14G1214900;MD14G1213900;MD14G1214700;MD14G1216300;MD14G1213800;MD14G1216100;MD14G1214200;MD14G1215900;MD14G1214100;MD14G1216700;MD14G1214500;MD14G1216400;MD14G1215800;MD14G1215000
154	MSTRG.123969.1	MD15G1242400;MD15G1241700;MD15G1241100;MD15G1242300;MD15G1241200;MD15G1240800;MD15G1241500;MD15G1242600;MD15G1241900;MD15G1241800;MD15G1240700;MD15G1242700;MD15G1241300;MD15G1242200;MD15G1240300;MD15G1240500;MD15G1242800;MD15G1241600;MD15G1241400;MD15G1241000;MD15G1240600;MD15G1240200;MD15G1240400;MD15G1242000;MD15G1242500
155	MSTRG.106374.12	MD13G1158900;MD13G1158400;MD13G1158000;MD13G1157600;MD13G1159000;MD13G1157400;MD13G1158800;MD13G1158700;MD13G1158100;MD13G1158300;MD13G1157700;MD13G1159100;MD13G1157300;MD13G1157500
156	MSTRG.40447.19	MD05G1107600;MD05G1106700;MD05G1106100;MD05G1106300;MD05G1106200;MD05G1107300;MD05G1107000;MD05G1106000;MD05G1107500;MD05G1107700;MD05G1106400;MD05G1106900;MD05G1106600;MD05G1106800
157	MSTRG.77041.6	MD09G1292500;MD09G1292900;MD09G1291900;MD09G1291800;MD09G1293300;MD09G1293000;MD09G1292100;MD09G1292300;MD09G1292700;MD09G1293200;MD09G1293400;MD09G1292000;MD09G1292800;MD09G1292400;MD09G1293100
158	MSTRG.56241.4	MD07G1109700;MD07G1108700;MD07G1110100;MD07G1109500;MD07G1108800;MD07G1108500;MD07G1108900;MD07G1109900;MD07G1109200;MD07G1108600;MD07G1109600;MD07G1109400;MD07G1109800;MD07G1109300
159	MSTRG.85598.2	MD10G1298900;MD10G1299400;MD10G1299100;MD10G1298800;MD10G1298200;MD10G1299600;MD10G1299800;MD10G1298500;MD10G1298700;MD10G1299700;MD10G1299300;MD10G1298300;MD10G1298400;MD10G1299500
160	MSTRG.135097.1	MD16G1183900;MD16G1184100;MD16G1183800;MD16G1185200;MD16G1183700;MD16G1184200;MD16G1185300;MD16G1184000;MD16G1183500;MD16G1184500;MD16G1185100;MD16G1184300;MD16G1183400;MD16G1184800;MD16G1185000;MD16G1184700;MD16G1183600
161	MSTRG.87209.3	MD11G1026700;MD11G1027000;MD11G1026000;MD11G1025200;MD11G1026600;MD11G1025400;MD11G1025700;MD11G1025500;MD11G1026900;MD11G1026100;MD11G1026200;MD11G1027100;MD11G1027200;MD11G1025000;MD11G1026500;MD11G1026800;MD11G1026400;MD11G1025100;MD11G1025600;MD11G1025300
162	MSTRG.7344.45	MD00G1220300;MD00G1219900;MD00G1215700;MD00G1220200;MD00G1215600;MD00G1220000;MD00G1215800;MD00G1215500
163	MSTRG.123191.3	MD15G1215000;MD15G1213200;MD15G1214700;MD15G1213300;MD15G1213600;MD15G1213400;MD15G1213000;MD15G1214600;MD15G1213900;MD15G1213500;MD15G1214200;MD15G1214800;MD15G1214500;MD15G1214000;MD15G1213700;MD15G1213100;MD15G1214100;MD15G1213800;MD15G1214900
164	MSTRG.28195.7	MD03G1224100;MD03G1223400;MD03G1222900;MD03G1223300;MD03G1223800;MD03G1223700;MD03G1224000;MD03G1223600;MD03G1223900;MD03G1223500
165	MSTRG.10690.8	MD01G1104800;MD01G1104300;MD01G1105000;MD01G1103800;MD01G1104200;MD01G1104600;MD01G1104900;MD01G1104700;MD01G1105100
166	MSTRG.126509.3	MD15G1325300;MD15G1325700;MD15G1325900;MD15G1326000;MD15G1325800
167	MSTRG.10984.1	MD01G1113200;MD01G1113900;MD01G1112400;MD01G1113800;MD01G1113600;MD01G1112600;MD01G1113000;MD01G1112800;MD01G1113700;MD01G1113400;MD01G1112500;MD01G1112900;MD01G1113100;MD01G1113500;MD01G1113300
168	MSTRG.71910.3	MD09G1126900;MD09G1126300;MD09G1127900;MD09G1125800;MD09G1127100;MD09G1128200;MD09G1127800;MD09G1128000;MD09G1126400;MD09G1126700;MD09G1127000;MD09G1126000;MD09G1125900;MD09G1127200;MD09G1127400;MD09G1126200;MD09G1126500;MD09G1128100;MD09G1127500;MD09G1125700;MD09G1127700;MD09G1127600;MD09G1126600;MD09G1127300;MD09G1126100
169	MSTRG.77683.24	MD10G1026400;MD10G1025900;MD10G1025800;MD10G1025600;MD10G1026500;MD10G1026200;MD10G1025100;MD10G1025500;MD10G1026100;MD10G1025300;MD10G1026300;MD10G1025200
170	MSTRG.58956.1	MD07G1189600;MD07G1188600;MD07G1190000;MD07G1190700;MD07G1190500;MD07G1190400;MD07G1191200;MD07G1190100;MD07G1191000;MD07G1190300;MD07G1190900;MD07G1190800;MD07G1189000;MD07G1191300;MD07G1189200;MD07G1189900;MD07G1189100;MD07G1189300;MD07G1189400;MD07G1190600;MD07G1188700;MD07G1190200;MD07G1189500;MD07G1188800;MD07G1191100
171	MSTRG.9542.49	MD01G1063300;MD01G1064000;MD01G1063100;MD01G1063000;MD01G1061600;MD01G1063700;MD01G1064100;MD01G1062800;MD01G1063800;MD01G1062000;MD01G1063400;MD01G1061900;MD01G1063900;MD01G1061700;MD01G1063600;MD01G1063200;MD01G1061800;MD01G1062700
172	MSTRG.97326.1	MD12G1082100;MD12G1081800;MD12G1082200;MD12G1082400;MD12G1083500;MD12G1082300;MD12G1083100;MD12G1083400;MD12G1083200;MD12G1082600;MD12G1083600;MD12G1082800;MD12G1083300;MD12G1081700;MD12G1082900;MD12G1082500;MD12G1082000;MD12G1081900
173	MSTRG.37634.1	MD05G1021500;MD05G1021200;MD05G1021100;MD05G1021800;MD05G1021400;MD05G1022600;MD05G1021600;MD05G1022300;MD05G1021700;MD05G1022000;MD05G1022200;MD05G1022400;MD05G1021300;MD05G1022500
174	MSTRG.43480.1	MD05G1224600;MD05G1223300;MD05G1223100;MD05G1224300;MD05G1223400;MD05G1223600;MD05G1224200;MD05G1224400;MD05G1223200;MD05G1224100;MD05G1224800;MD05G1224500;MD05G1223500;MD05G1224900;MD05G1223700;MD05G1224700
175	MSTRG.21473.2	MD02G1300000;MD02G1298400;MD02G1298700;MD02G1299500;MD02G1299300;MD02G1299100;MD02G1298500;MD02G1298200;MD02G1299800;MD02G1299900;MD02G1299000;MD02G1298000;MD02G1298900;MD02G1299700;MD02G1298300;MD02G1298800;MD02G1298600;MD02G1299400;MD02G1298100
176	MSTRG.56129.48	MD07G1104500;MD07G1104300;MD07G1105600;MD07G1105500;MD07G1105300;MD07G1104800;MD07G1104600;MD07G1105400;MD07G1104700;MD07G1104900;MD07G1104400;MD07G1105900
177	MSTRG.53273.1	MD06G1224600;MD06G1225400;MD06G1224300;MD06G1224500;MD06G1225000;MD06G1224800;MD06G1226100;MD06G1225800;MD06G1225500;MD06G1226200;MD06G1225600;MD06G1226000;MD06G1224900;MD06G1226300;MD06G1225900;MD06G1225100;MD06G1225300;MD06G1225200;MD06G1224400
178	MSTRG.102075.2	MD12G1250900;MD12G1250700;MD12G1250600;MD12G1250300;MD12G1251800;MD12G1250800;MD12G1251100;MD12G1251600;MD12G1250500;MD12G1251900;MD12G1251000;MD12G1251400;MD12G1250100;MD12G1251200;MD12G1251700;MD12G1251500;MD12G1251300
179	MSTRG.105700.1	MD13G1131000;MD13G1131600;MD13G1131100;MD13G1131700;MD13G1129800;MD13G1130600;MD13G1130400;MD13G1130700;MD13G1130900;MD13G1130100;MD13G1131200;MD13G1131400;MD13G1129700;MD13G1130200;MD13G1130000;MD13G1131300;MD13G1131500;MD13G1129900;MD13G1130300
180	MSTRG.52042.4	MD06G1176900;MD06G1175700;MD06G1176000;MD06G1176700;MD06G1175900;MD06G1176100;MD06G1177200;MD06G1176800;MD06G1175800;MD06G1177300;MD06G1176300;MD06G1177000;MD06G1176400;MD06G1177100;MD06G1176600
181	MSTRG.44682.8	MD05G1271800;MD05G1270900;MD05G1272100;MD05G1271100;MD05G1271600;MD05G1272400;MD05G1274300;MD05G1271700;MD05G1273700;MD05G1271000;MD05G1274200;MD05G1273800;MD05G1272300;MD05G1273300;MD05G1271300;MD05G1273900;MD05G1274000;MD05G1274100;MD05G1273200;MD05G1271500;MD05G1270800;MD05G1272500;MD05G1271400;MD05G1271200;MD05G1274400;MD05G1272000
182	MSTRG.114843.2	MD14G1132200;MD14G1131500;MD14G1131300;MD14G1131000;MD14G1131900;MD14G1131100;MD14G1132000;MD14G1130800;MD14G1132300
183	MSTRG.132841.2	MD16G1105800;MD16G1103300;MD16G1105600;MD16G1104300;MD16G1103500;MD16G1105700;MD16G1105000;MD16G1104700;MD16G1103200;MD16G1103400;MD16G1104500;MD16G1103600;MD16G1103900;MD16G1104800;MD16G1104000;MD16G1104600;MD16G1104900;MD16G1104200;MD16G1105400;MD16G1104400
184	MSTRG.60186.1	MD07G1240500;MD07G1242100;MD07G1239600;MD07G1241200;MD07G1240000;MD07G1241400;MD07G1240600;MD07G1240100;MD07G1241600;MD07G1239700;MD07G1241800;MD07G1241500;MD07G1240400;MD07G1239500;MD07G1241000;MD07G1240200;MD07G1241300;MD07G1241700;MD07G1242000;MD07G1240900;MD07G1240700;MD07G1240300;MD07G1239800;MD07G1241900;MD07G1239900;MD07G1241100
185	MSTRG.60895.2	MD07G1270400;MD07G1271600;MD07G1271400;MD07G1271300;MD07G1272100;MD07G1269500;MD07G1272500;MD07G1272000;MD07G1271900;MD07G1270500;MD07G1271200;MD07G1269600;MD07G1270300;MD07G1271700;MD07G1270600;MD07G1271500;MD07G1272600;MD07G1269800;MD07G1270800;MD07G1272200;MD07G1270900;MD07G1270200;MD07G1270100;MD07G1269700;MD07G1270700;MD07G1272400;MD07G1269900;MD07G1270000;MD07G1272300;MD07G1269400;MD07G1271…
186	MSTRG.50687.2	MD06G1123900;MD06G1122500;MD06G1122400;MD06G1122300;MD06G1123800;MD06G1124000;MD06G1122900;MD06G1123700;MD06G1122600
187	MSTRG.54754.2	MD07G1049600;MD07G1050100;MD07G1050400;MD07G1050500;MD07G1050300;MD07G1049900;MD07G1049500;MD07G1050000;MD07G1050900;MD07G1050200;MD07G1049700;MD07G1049800;MD07G1050600;MD07G1050700
188	MSTRG.52131.1	MD06G1181800;MD06G1181200;MD06G1181600;MD06G1180300;MD06G1179800;MD06G1180700;MD06G1179700;MD06G1181400;MD06G1182300;MD06G1182400;MD06G1181000;MD06G1180200;MD06G1180000;MD06G1181300;MD06G1179600;MD06G1181700;MD06G1181500;MD06G1182100;MD06G1179400;MD06G1180400;MD06G1181100;MD06G1180800;MD06G1181900;MD06G1179500;MD06G1182000;MD06G1180500;MD06G1180900
189	MSTRG.103194.1	MD13G1033900;MD13G1034700;MD13G1035600;MD13G1035800;MD13G1033200;MD13G1035300;MD13G1034400;MD13G1035400;MD13G1033800;MD13G1034600;MD13G1033100;MD13G1033500;MD13G1033400;MD13G1034100;MD13G1033700;MD13G1035500;MD13G1035200;MD13G1035700;MD13G1034900;MD13G1034200;MD13G1033000;MD13G1034300;MD13G1035000;MD13G1033600;MD13G1034500;MD13G1032900;MD13G1032800;MD13G1034800;MD13G1033300;MD13G1035100
190	MSTRG.75077.7	MD09G1225800;MD09G1225200;MD09G1225700;MD09G1225600
191	MSTRG.64889.1	MD08G1120200;MD08G1120500;MD08G1120100;MD08G1120300;MD08G1119700;MD08G1119900;MD08G1119600;MD08G1119800;MD08G1120000;MD08G1120400
192	MSTRG.112240.1	MD14G1050300;MD14G1049600;MD14G1049900;MD14G1050800;MD14G1050100;MD14G1050900;MD14G1051100;MD14G1050700;MD14G1050000;MD14G1051300;MD14G1049500;MD14G1050200;MD14G1049700;MD14G1050500;MD14G1050400;MD14G1050600;MD14G1049800;MD14G1051200
193	MSTRG.99153.8	MD12G1133800;MD12G1133600;MD12G1133000;MD12G1133300;MD12G1134200;MD12G1134300;MD12G1133700;MD12G1134000;MD12G1133200;MD12G1132900;MD12G1134100
194	MSTRG.88766.10	MD11G1103500;MD11G1102100;MD11G1103400;MD11G1103300;MD11G1102200;MD11G1103100;MD11G1103600;MD11G1102700;MD11G1102300;MD11G1103200;MD11G1102800;MD11G1102600;MD11G1102400;MD11G1103000
195	MSTRG.74593.1	MD09G1216400;MD09G1216600
196	MSTRG.82112.1	MD10G1163500;MD10G1163000;MD10G1163600;MD10G1164300;MD10G1163800;MD10G1164600;MD10G1164800;MD10G1164500;MD10G1164100;MD10G1163400;MD10G1165000;MD10G1164900;MD10G1165100;MD10G1164200;MD10G1164700;MD10G1164400;MD10G1163700;MD10G1163900
197	MSTRG.110144.7	MD13G1269900;MD13G1270000;MD13G1270500;MD13G1270400
198	MSTRG.49298.1	MD06G1077200;MD06G1076900;MD06G1077300;MD06G1077700;MD06G1077500;MD06G1077400;MD06G1077800;MD06G1077600;MD06G1077100;MD06G1077000
199	MSTRG.113127.5	MD14G1081100;MD14G1080800;MD14G1080700;MD14G1080000;MD14G1080400;MD14G1080200;MD14G1080500;MD14G1080900;MD14G1080600;MD14G1080300;MD14G1080100
200	MSTRG.42003.1	MD05G1167300;MD05G1167900;MD05G1167700;MD05G1167400;MD05G1168000;MD05G1167200;MD05G1166800;MD05G1168100;MD05G1168300;MD05G1167100;MD05G1167000;MD05G1168600;MD05G1168500;MD05G1166900;MD05G1168800;MD05G1168700;MD05G1167500;MD05G1168200;MD05G1166700;MD05G1168400;MD05G1167600;MD05G1167800
201	MSTRG.69497.12	MD09G1021700;MD09G1020300;MD09G1021100;MD09G1020900;MD09G1020600;MD09G1023400;MD09G1021900;MD09G1021400;MD09G1023600;MD09G1023200;MD09G1020400;MD09G1022700;MD09G1022200;MD09G1022300;MD09G1023500;MD09G1021800;MD09G1021000;MD09G1021600;MD09G1021200;MD09G1020800;MD09G1020700;MD09G1023000;MD09G1022100;MD09G1022800;MD09G1023800;MD09G1021300;MD09G1021500;MD09G1024000;MD09G1023300;MD09G1020500;MD09G1022…
202	MSTRG.108993.1	MD13G1241600;MD13G1241500;MD13G1241900;MD13G1241400;MD13G1241700;MD13G1242200;MD13G1241300;MD13G1241800
203	MSTRG.101768.1	MD12G1235100;MD12G1234200;MD12G1234900;MD12G1234600;MD12G1235200;MD12G1234800;MD12G1236400;MD12G1236500;MD12G1236200;MD12G1234000;MD12G1233600;MD12G1233900;MD12G1233000;MD12G1233100;MD12G1234400;MD12G1233300;MD12G1234100;MD12G1236000;MD12G1236700;MD12G1232900;MD12G1233500;MD12G1233800;MD12G1233200;MD12G1233700;MD12G1236600;MD12G1235300;MD12G1233400;MD12G1235000;MD12G1236300;MD12G1235500;MD12G1236…
204	MSTRG.80153.2	MD10G1097600;MD10G1097100;MD10G1097000;MD10G1097900;MD10G1097500;MD10G1097200;MD10G1097700;MD10G1097300;MD10G1097400
205	MSTRG.138117.1	MD16G1269400;MD16G1269500;MD16G1270100;MD16G1269900;MD16G1269600;MD16G1270000;MD16G1269700
206	MSTRG.83151.1	MD10G1200800;MD10G1201500;MD10G1199900;MD10G1200300;MD10G1201400;MD10G1200000;MD10G1200400;MD10G1199700;MD10G1200500;MD10G1200600;MD10G1201000;MD10G1200100;MD10G1200200;MD10G1201100;MD10G1200900
207	MSTRG.23158.1	MD03G1054400;MD03G1054100;MD03G1056000;MD03G1055500;MD03G1054300;MD03G1053100;MD03G1055400;MD03G1053800;MD03G1054800;MD03G1053900;MD03G1054900;MD03G1055900;MD03G1054200;MD03G1053700;MD03G1055000;MD03G1053500;MD03G1053200;MD03G1055800;MD03G1055300;MD03G1054500;MD03G1055100;MD03G1054600;MD03G1054700;MD03G1055700;MD03G1053600;MD03G1055200
208	MSTRG.106099.1	MD13G1147700;MD13G1146800;MD13G1147900;MD13G1146600;MD13G1148000;MD13G1147100;MD13G1147200;MD13G1147400;MD13G1146200;MD13G1147000;MD13G1146900;MD13G1147600;MD13G1146400;MD13G1147300;MD13G1148100;MD13G1147500;MD13G1148200;MD13G1146500
209	MSTRG.94499.1	MD11G1292300;MD11G1292000;MD11G1292900;MD11G1293400;MD11G1292100;MD11G1291700;MD11G1291800;MD11G1293300;MD11G1291500;MD11G1293200;MD11G1291900;MD11G1292500;MD11G1293100;MD11G1292400;MD11G1293500;MD11G1292600;MD11G1293000
210	MSTRG.40447.11	MD05G1107600;MD05G1106200;MD05G1106300;MD05G1106100;MD05G1106700;MD05G1107300;MD05G1106400;MD05G1107700;MD05G1107000;MD05G1107500;MD05G1106000;MD05G1106600;MD05G1106900;MD05G1106800
211	MSTRG.141813.1	MD17G1124700;MD17G1125500;MD17G1124300;MD17G1125000;MD17G1124500;MD17G1124400;MD17G1124000;MD17G1124800;MD17G1123500;MD17G1123600;MD17G1124900;MD17G1123900;MD17G1124200;MD17G1125300;MD17G1125400;MD17G1124600;MD17G1125100;MD17G1123700;MD17G1123800;MD17G1125600;MD17G1124100
212	MSTRG.31293.2	MD04G1042500;MD04G1043700;MD04G1042400;MD04G1042700;MD04G1043500;MD04G1044100;MD04G1044300;MD04G1043800;MD04G1043600;MD04G1042800;MD04G1042600;MD04G1043000;MD04G1044200;MD04G1044700;MD04G1043100;MD04G1043900;MD04G1042900;MD04G1044400;MD04G1044500;MD04G1044600
213	MSTRG.18637.1	MD02G1195200;MD02G1195300;MD02G1195400;MD02G1195500;MD02G1195700;MD02G1194900;MD02G1194500;MD02G1195600;MD02G1195000;MD02G1194700;MD02G1195100;MD02G1194600
214	MSTRG.12414.1	MD01G1175500;MD01G1176900;MD01G1176300;MD01G1174900;MD01G1175400;MD01G1175600;MD01G1175700;MD01G1175200;MD01G1175100;MD01G1177000;MD01G1176100;MD01G1176700;MD01G1174700;MD01G1174800;MD01G1176600;MD01G1175000;MD01G1175300;MD01G1176500;MD01G1176400
215	MSTRG.28953.3	MD03G1251800;MD03G1251200;MD03G1250600;MD03G1252900;MD03G1253200;MD03G1251600;MD03G1253000;MD03G1251400;MD03G1252200;MD03G1253100;MD03G1250900;MD03G1251300;MD03G1252000;MD03G1252400;MD03G1252500;MD03G1250700;MD03G1251900;MD03G1250800;MD03G1251000;MD03G1250400;MD03G1251100;MD03G1250500;MD03G1252300;MD03G1251500;MD03G1252100
216	MSTRG.24761.1	MD03G1118500;MD03G1119100;MD03G1118400
217	MSTRG.138867.1	MD16G1287000;MD16G1287500;MD16G1288000;MD16G1287100;MD16G1287800;MD16G1287400;MD16G1287200;MD16G1286900;MD16G1287600;MD16G1287300
218	MSTRG.10262.1	MD01G1087400;MD01G1087800;MD01G1087300;MD01G1087200;MD01G1087900;MD01G1087700;MD01G1087600;MD01G1088100
219	MSTRG.44293.1	MD05G1256000;MD05G1255900;MD05G1256700;MD05G1256600;MD05G1256900;MD05G1256200;MD05G1256100;MD05G1255600;MD05G1255700;MD05G1256500;MD05G1257300;MD05G1256800;MD05G1256300;MD05G1257000;MD05G1257200
220	MSTRG.29824.2	MD03G1291200;MD03G1288900;MD03G1290600;MD03G1291500;MD03G1290200;MD03G1288600;MD03G1289100;MD03G1290300;MD03G1288700;MD03G1291700;MD03G1291300;MD03G1290500;MD03G1289600;MD03G1290800;MD03G1290100;MD03G1290000;MD03G1290900;MD03G1291400;MD03G1290700;MD03G1289900;MD03G1288500;MD03G1289500;MD03G1289800;MD03G1291000;MD03G1288800;MD03G1289400;MD03G1289000;MD03G1289700;MD03G1291600;MD03G1290400
221	MSTRG.106382.1	MD13G1158900;MD13G1158000;MD13G1159000;MD13G1158800;MD13G1158300;MD13G1158100;MD13G1158700;MD13G1159100;MD13G1159400;MD13G1158200;MD13G1159200;MD13G1159300
222	MSTRG.25752.1	MD03G1147000;MD03G1147100;MD03G1146400;MD03G1147400;MD03G1147300;MD03G1147500;MD03G1146900;MD03G1147200;MD03G1146700;MD03G1146800;MD03G1146300
223	MSTRG.95825.1	MD12G1029700;MD12G1030200;MD12G1029300;MD12G1030600;MD12G1030500;MD12G1029200;MD12G1030700;MD12G1029100;MD12G1029800;MD12G1030400;MD12G1029600;MD12G1029500
224	MSTRG.28994.1	MD03G1251600;MD03G1254400;MD03G1254600;MD03G1253000;MD03G1253800;MD03G1253100;MD03G1254300;MD03G1252200;MD03G1251800;MD03G1253900;MD03G1252900;MD03G1253200;MD03G1253600;MD03G1252300;MD03G1253300;MD03G1252100;MD03G1251500;MD03G1253400;MD03G1253700;MD03G1253500;MD03G1252000;MD03G1252400;MD03G1254200;MD03G1251900;MD03G1251700;MD03G1254500;MD03G1252500;MD03G1254000;MD03G1254100
225	MSTRG.126194.3	MD15G1315800;MD15G1315400;MD15G1315500;MD15G1315600;MD15G1316100
226	MSTRG.11513.1	MD01G1137000;MD01G1137400;MD01G1136300;MD01G1136700;MD01G1137300;MD01G1136900;MD01G1136500;MD01G1136600;MD01G1136400;MD01G1137200;MD01G1136800;MD01G1137500
227	MSTRG.34686.8	MD04G1155900;MD04G1159000;MD04G1155700;MD04G1159500;MD04G1155600;MD04G1158900;MD04G1156000;MD04G1159300;MD04G1155400;MD04G1154900;MD04G1155800;MD04G1159100;MD04G1159200;MD04G1154600;MD04G1155500;MD04G1159400
228	MSTRG.74349.2	MD09G1209600;MD09G1209800;MD09G1210000;MD09G1209900;MD09G1210300;MD09G1209700;MD09G1210100
229	MSTRG.68337.5	MD08G1228000;MD08G1226700;MD08G1228300;MD08G1227900;MD08G1226800;MD08G1227100;MD08G1227300;MD08G1226900;MD08G1227500;MD08G1228200;MD08G1227600;MD08G1228400;MD08G1228500;MD08G1227200;MD08G1227000;MD08G1228100;MD08G1228600;MD08G1227400;MD08G1227800;MD08G1226600
230	MSTRG.913.24	MD00G1030300;MD00G1028900;MD00G1030000;MD00G1030400;MD00G1029200;MD00G1029300;MD00G1029100;MD00G1029000;MD00G1029500;MD00G1029400
231	MSTRG.110092.1	MD13G1269300;MD13G1269000;MD13G1268900
232	MSTRG.40447.14	MD05G1106800;MD05G1106600;MD05G1106900;MD05G1107500;MD05G1107000;MD05G1106000;MD05G1106400;MD05G1107700;MD05G1107300;MD05G1106700;MD05G1106100;MD05G1106200;MD05G1106300;MD05G1107600
233	MSTRG.146543.1	MD17G1284100;MD17G1283500;MD17G1282900;MD17G1283800;MD17G1284000;MD17G1283200;MD17G1283400;MD17G1283300;MD17G1282800;MD17G1284200;MD17G1282700;MD17G1283900;MD17G1284300;MD17G1283700
234	MSTRG.51462.1	MD06G1151000;MD06G1151100;MD06G1151400;MD06G1150900;MD06G1151200;MD06G1150600;MD06G1150500;MD06G1151500
235	MSTRG.77544.1	MD10G1020400;MD10G1020200;MD10G1019400;MD10G1019000;MD10G1019300;MD10G1019200;MD10G1020000;MD10G1020800;MD10G1020500;MD10G1019800;MD10G1019900;MD10G1019600;MD10G1018900;MD10G1020900;MD10G1020100;MD10G1019100;MD10G1019700;MD10G1019500;MD10G1020700;MD10G1020300
236	MSTRG.6339.1	MD00G1179200;MD00G1179500;MD00G1179100;MD00G1179900;MD00G1179800;MD00G1179300;MD00G1179600;MD00G1179000;MD00G1179700;MD00G1179400
237	MSTRG.28063.1	MD03G1219500;MD03G1218400;MD03G1221100;MD03G1220300;MD03G1220500;MD03G1219600;MD03G1220800;MD03G1218900;MD03G1219800;MD03G1220400;MD03G1219000;MD03G1218800;MD03G1218600;MD03G1219400;MD03G1219700;MD03G1220100;MD03G1219200;MD03G1219300;MD03G1218500;MD03G1220200;MD03G1219900
238	MSTRG.87560.14	MD11G1045800;MD11G1044700;MD11G1044100;MD11G1043900;MD11G1045400;MD11G1045000;MD11G1044400;MD11G1044600;MD11G1045900;MD11G1044000;MD11G1043800;MD11G1045300;MD11G1045500;MD11G1045100;MD11G1044800;MD11G1045600;MD11G1046000;MD11G1043700;MD11G1045700;MD11G1044500
239	MSTRG.65842.13	MD08G1152000;MD08G1151900;MD08G1152100;MD08G1151500;MD08G1151400
240	MSTRG.67010.1	MD08G1184500;MD08G1184900;MD08G1183900;MD08G1184300;MD08G1184600;MD08G1184700;MD08G1184200;MD08G1184400;MD08G1184000;MD08G1184100
241	MSTRG.56554.3	MD07G1117400;MD07G1117800;MD07G1117900;MD07G1117600;MD07G1118000;MD07G1117500;MD07G1117300
242	MSTRG.54578.2	MD07G1043700;MD07G1043900;MD07G1043800;MD07G1044500;MD07G1044800;MD07G1044900;MD07G1043400;MD07G1044200;MD07G1043600;MD07G1045000;MD07G1044300;MD07G1044400;MD07G1043500;MD07G1044000
243	MSTRG.137626.1	MD16G1259200;MD16G1259400;MD16G1259300;MD16G1259500
244	MSTRG.98553.2	MD12G1115700;MD12G1115800;MD12G1116000;MD12G1115400;MD12G1115900;MD12G1115500;MD12G1116700;MD12G1115600;MD12G1116100;MD12G1116500
245	MSTRG.40447.10	MD05G1107600;MD05G1106700;MD05G1106100;MD05G1106200;MD05G1106300;MD05G1107300;MD05G1106000;MD05G1107000;MD05G1107500;MD05G1106400;MD05G1107700;MD05G1106600;MD05G1106900;MD05G1106800
246	MSTRG.113884.1	MD14G1102700;MD14G1102600;MD14G1102900;MD14G1103000;MD14G1103100;MD14G1103200;MD14G1102800
247	MSTRG.97507.1	MD12G1088800;MD12G1088900;MD12G1089100;MD12G1089300;MD12G1089200;MD12G1089400
248	MSTRG.52022.1	MD06G1175600;MD06G1175200;MD06G1175800;MD06G1174500;MD06G1176300;MD06G1174200;MD06G1174800;MD06G1174300;MD06G1174600;MD06G1176000;MD06G1175900;MD06G1175400;MD06G1174700;MD06G1174000;MD06G1175000;MD06G1176100;MD06G1174400;MD06G1174100;MD06G1175700
249	MSTRG.43290.1	MD05G1216600;MD05G1217500;MD05G1216300;MD05G1216900;MD05G1217700;MD05G1217300;MD05G1217000;MD05G1216800;MD05G1216500;MD05G1215800;MD05G1217200;MD05G1217100;MD05G1215700;MD05G1216100;MD05G1216700;MD05G1215900;MD05G1216400;MD05G1217600;MD05G1217400
250	MSTRG.16306.1	MD02G1111800;MD02G1111300;MD02G1110800;MD02G1112400;MD02G1112300;MD02G1112100;MD02G1111400;MD02G1110500;MD02G1112200;MD02G1111700;MD02G1111500;MD02G1110900;MD02G1111600;MD02G1112000;MD02G1111900;MD02G1111200;MD02G1110700;MD02G1110600;MD02G1111100
251	MSTRG.137944.2	MD16G1265100;MD16G1265400;MD16G1265300;MD16G1266000;MD16G1265900
252	MSTRG.91939.1	MD11G1204400;MD11G1205300;MD11G1205400;MD11G1205200;MD11G1205900;MD11G1204800;MD11G1205800;MD11G1205600;MD11G1204900;MD11G1205700;MD11G1204600;MD11G1205500;MD11G1204700;MD11G1205100;MD11G1205000
253	MSTRG.81023.2	MD10G1126300;MD10G1126700;MD10G1125400;MD10G1126800;MD10G1126500;MD10G1125900;MD10G1125800;MD10G1126900;MD10G1126200;MD10G1126400;MD10G1125700;MD10G1126100;MD10G1126600
254	MSTRG.60259.1	MD07G1247800;MD07G1246200;MD07G1247200;MD07G1248300;MD07G1247900;MD07G1246800;MD07G1248000;MD07G1246000;MD07G1247700;MD07G1245900;MD07G1247000;MD07G1245800;MD07G1247100;MD07G1246400;MD07G1248100;MD07G1247300;MD07G1246100;MD07G1247400;MD07G1247600;MD07G1247500;MD07G1248200
255	MSTRG.14972.35	MD02G1049400;MD02G1048200;MD02G1049900;MD02G1047700;MD02G1049500;MD02G1048600;MD02G1050300;MD02G1048100;MD02G1048300;MD02G1047900;MD02G1049600;MD02G1047300;MD02G1047800;MD02G1047500;MD02G1050000;MD02G1047600;MD02G1047200;MD02G1050200;MD02G1048400;MD02G1048800;MD02G1049300;MD02G1049700;MD02G1048700;MD02G1049800;MD02G1048000;MD02G1050100;MD02G1048900;MD02G1049000
256	MSTRG.15899.6	MD02G1094500;MD02G1095000;MD02G1095700;MD02G1095200;MD02G1094800;MD02G1093800;MD02G1094600;MD02G1094300;MD02G1095400;MD02G1093300;MD02G1095100;MD02G1094400;MD02G1093600;MD02G1094700;MD02G1094100;MD02G1094900;MD02G1095800;MD02G1094000;MD02G1095300;MD02G1095600;MD02G1095500;MD02G1094200;MD02G1093900;MD02G1093200;MD02G1093500
257	MSTRG.116743.6	MD14G1203500;MD14G1201800;MD14G1203200;MD14G1204500;MD14G1202900;MD14G1202000;MD14G1204300;MD14G1203600;MD14G1202600;MD14G1203800;MD14G1203300;MD14G1201700;MD14G1203700;MD14G1204100;MD14G1201900;MD14G1204200;MD14G1203400;MD14G1202100;MD14G1202700;MD14G1204400;MD14G1204000;MD14G1202500;MD14G1203900;MD14G1203000
258	MSTRG.82094.2	MD10G1163500;MD10G1162300;MD10G1162100;MD10G1162500;MD10G1163400;MD10G1163000;MD10G1162400;MD10G1163600;MD10G1162800;MD10G1162200;MD10G1162700;MD10G1163800;MD10G1162900;MD10G1163700
259	MSTRG.19986.1	MD02G1240700;MD02G1240400;MD02G1239400;MD02G1240900;MD02G1239300;MD02G1239500;MD02G1240000;MD02G1239900;MD02G1240300;MD02G1240800;MD02G1239700;MD02G1240200;MD02G1239800;MD02G1239600;MD02G1240600;MD02G1240500
260	MSTRG.109203.2	MD13G1248900;MD13G1249900;MD13G1249600;MD13G1249800;MD13G1250300;MD13G1249500;MD13G1250500;MD13G1248300;MD13G1250000;MD13G1249100;MD13G1248800;MD13G1250100;MD13G1249300;MD13G1249200;MD13G1249000;MD13G1249400;MD13G1250200
261	MSTRG.114137.1	MD14G1109100;MD14G1109500;MD14G1109400;MD14G1109300;MD14G1109200;MD14G1109000
262	MSTRG.40599.1	MD05G1112000;MD05G1111200;MD05G1111000;MD05G1110700;MD05G1110600;MD05G1111800;MD05G1111600;MD05G1110900;MD05G1111300;MD05G1110800;MD05G1111900;MD05G1111700
263	MSTRG.6163.1	MD00G1175200;MD00G1174800;MD00G1175600;MD00G1175300;MD00G1175100;MD00G1174500;MD00G1175000;MD00G1174900;MD00G1175700;MD00G1174600;MD00G1175400;MD00G1175500
264	MSTRG.73089.1	MD09G1171700;MD09G1172100;MD09G1172300;MD09G1173100;MD09G1172600;MD09G1171500;MD09G1171300;MD09G1172900;MD09G1173000;MD09G1171900;MD09G1172200;MD09G1171400;MD09G1172800;MD09G1171600;MD09G1172000;MD09G1171800;MD09G1172400;MD09G1172700
265	MSTRG.77740.1	MD10G1027400;MD10G1027700;MD10G1027500;MD10G1027600
266	MSTRG.19872.1	MD02G1235700;MD02G1234400;MD02G1235600;MD02G1234300;MD02G1234800;MD02G1234200;MD02G1236200;MD02G1235900;MD02G1236100;MD02G1234600;MD02G1234700;MD02G1235800;MD02G1236300;MD02G1234100;MD02G1234500;MD02G1235500;MD02G1236000
267	MSTRG.54996.1	MD07G1062600;MD07G1062100;MD07G1061600;MD07G1061400;MD07G1062300;MD07G1060600;MD07G1060900;MD07G1061000;MD07G1062400;MD07G1061100;MD07G1062000;MD07G1061500;MD07G1061200;MD07G1060700;MD07G1060800;MD07G1062700;MD07G1062200;MD07G1061300;MD07G1062500
268	MSTRG.134930.2	MD16G1178200;MD16G1177400;MD16G1177200;MD16G1178000;MD16G1177500;MD16G1178400;MD16G1177100;MD16G1177000;MD16G1178300;MD16G1177700;MD16G1177900;MD16G1177300;MD16G1177800;MD16G1178100;MD16G1177600
269	MSTRG.122581.2	MD15G1188500;MD15G1190800;MD15G1188900;MD15G1189200;MD15G1189800;MD15G1189600;MD15G1189100;MD15G1189900;MD15G1188400;MD15G1188200;MD15G1190300;MD15G1190200;MD15G1188800;MD15G1189700;MD15G1190400;MD15G1190500;MD15G1188100;MD15G1190600;MD15G1190700;MD15G1188300;MD15G1189000;MD15G1189500;MD15G1188600;MD15G1190100;MD15G1189400
270	MSTRG.129394.2	MD15G1412100;MD15G1412700;MD15G1412600;MD15G1412400;MD15G1411700;MD15G1412800;MD15G1412500;MD15G1411400;MD15G1412000;MD15G1412200;MD15G1411900;MD15G1411200;MD15G1411300;MD15G1412300;MD15G1411500;MD15G1411800;MD15G1412900;MD15G1411600
271	MSTRG.84429.2	MD10G1256200;MD10G1255700;MD10G1255800;MD10G1255900;MD10G1256000;MD10G1256100;MD10G1256400;MD10G1256300;MD10G1255600
272	MSTRG.21461.1	MD02G1298200;MD02G1297800;MD02G1297100;MD02G1296900;MD02G1296800;MD02G1297000;MD02G1297200;MD02G1297700;MD02G1298100;MD02G1298300;MD02G1297300;MD02G1297500;MD02G1298000;MD02G1297600;MD02G1296600;MD02G1296700
273	MSTRG.115931.1	MD14G1170800;MD14G1170400;MD14G1169900;MD14G1170300;MD14G1170000;MD14G1171800;MD14G1171300;MD14G1171100;MD14G1170700;MD14G1170200;MD14G1170900;MD14G1171500;MD14G1171000;MD14G1170100;MD14G1171400;MD14G1171900;MD14G1172000;MD14G1171200;MD14G1170500;MD14G1170600;MD14G1172100;MD14G1171600
274	MSTRG.102072.4	MD12G1250000;MD12G1249300;MD12G1249000;MD12G1248200;MD12G1248500;MD12G1249500;MD12G1248600;MD12G1249400;MD12G1249200;MD12G1248800;MD12G1249700;MD12G1249600;MD12G1248900;MD12G1249100;MD12G1248300;MD12G1248100
275	MSTRG.85978.1	MD10G1312800;MD10G1314100;MD10G1313800;MD10G1313500;MD10G1314500;MD10G1314700;MD10G1312900;MD10G1314600;MD10G1313900;MD10G1314800;MD10G1314200;MD10G1313000;MD10G1314000;MD10G1313700;MD10G1314900;MD10G1315100;MD10G1312700;MD10G1315000;MD10G1313300;MD10G1313400;MD10G1314400;MD10G1313600;MD10G1314300;MD10G1315200
276	MSTRG.129242.8	MD15G1405400;MD15G1404400;MD15G1406500;MD15G1405800;MD15G1404600;MD15G1404200;MD15G1406600;MD15G1405200;MD15G1405300;MD15G1405700;MD15G1405900;MD15G1404100;MD15G1406700;MD15G1405100;MD15G1404300;MD15G1404900;MD15G1405500;MD15G1404700;MD15G1405000;MD15G1404500;MD15G1406000;MD15G1404800
277	MSTRG.128379.2	MD15G1379400;MD15G1379900;MD15G1379500;MD15G1379700;MD15G1380000;MD15G1379800;MD15G1379600;MD15G1379300
278	MSTRG.77605.6	MD10G1022100;MD10G1022300;MD10G1021600;MD10G1021500;MD10G1021400;MD10G1021700;MD10G1022600;MD10G1022000;MD10G1021900;MD10G1022400;MD10G1022500;MD10G1022200
279	MSTRG.138992.1	MD17G1004200;MD17G1003300;MD17G1004500;MD17G1002900;MD17G1004300;MD17G1003800;MD17G1003000;MD17G1002700;MD17G1002800;MD17G1003200;MD17G1005100;MD17G1003100;MD17G1003600;MD17G1003500;MD17G1004100;MD17G1002600;MD17G1003900;MD17G1004400;MD17G1003700;MD17G1004000;MD17G1004800;MD17G1003400
280	MSTRG.43544.1	MD05G1227100;MD05G1226500;MD05G1226800;MD05G1226400;MD05G1226900;MD05G1226200;MD05G1226600;MD05G1226300;MD05G1227000;MD05G1226700
281	MSTRG.57504.2	MD07G1145200;MD07G1145300;MD07G1145100;MD07G1145800;MD07G1145900;MD07G1146000;MD07G1145400
282	MSTRG.121529.1	MD15G1148200;MD15G1148400;MD15G1150700;MD15G1148700;MD15G1149500;MD15G1149400;MD15G1148900;MD15G1149800;MD15G1151400;MD15G1149200;MD15G1150400;MD15G1151100;MD15G1150100;MD15G1149100;MD15G1150200;MD15G1148800;MD15G1151600;MD15G1150800;MD15G1151200;MD15G1150300;MD15G1150000;MD15G1148600;MD15G1148300;MD15G1151300;MD15G1150500;MD15G1149300;MD15G1149700;MD15G1149000;MD15G1151000;MD15G1150900;MD15G1151…
283	MSTRG.10038.1	MD01G1081000;MD01G1080800;MD01G1079800;MD01G1079700;MD01G1080400;MD01G1080600;MD01G1081200;MD01G1080200;MD01G1080100;MD01G1079900;MD01G1080900;MD01G1079200;MD01G1079500;MD01G1079300;MD01G1080700;MD01G1081100;MD01G1079600;MD01G1080500;MD01G1080000
284	MSTRG.4663.1	MD00G1134600;MD00G1134400;MD00G1134800;MD00G1134500;MD00G1134900;MD00G1134700
285	MSTRG.111078.3	MD14G1005600;MD14G1006000;MD14G1005800;MD14G1006700;MD14G1005100;MD14G1006600;MD14G1006500;MD14G1006200;MD14G1006100;MD14G1005200;MD14G1005300;MD14G1005500;MD14G1005400;MD14G1005700;MD14G1006400;MD14G1006300
286	MSTRG.43534.1	MD05G1225800;MD05G1226300;MD05G1225900;MD05G1226600;MD05G1226400;MD05G1225700;MD05G1226200;MD05G1226500
287	MSTRG.125880.8	MD15G1306100;MD15G1305800;MD15G1305900;MD15G1306200
288	MSTRG.35665.1	MD04G1194800;MD04G1194400;MD04G1195800;MD04G1193500;MD04G1195500;MD04G1193400;MD04G1194100;MD04G1194000;MD04G1193200;MD04G1195400;MD04G1195300;MD04G1194200;MD04G1194900;MD04G1195700;MD04G1194700;MD04G1193100;MD04G1193300;MD04G1196000;MD04G1195900;MD04G1194300;MD04G1193800;MD04G1194500;MD04G1195000;MD04G1195600;MD04G1194600;MD04G1193700;MD04G1193600;MD04G1195100
289	MSTRG.27007.1	MD03G1185400;MD03G1185700;MD03G1186000;MD03G1186100;MD03G1185900;MD03G1186200;MD03G1185600;MD03G1185800;MD03G1185500;MD03G1185100
290	MSTRG.113400.18	MD14G1087500;MD14G1087700;MD14G1087100;MD14G1087800
291	MSTRG.56716.23	MD07G1123000;MD07G1122800;MD07G1122900;MD07G1122500;MD07G1122400;MD07G1122300;MD07G1122200
292	MSTRG.90439.1	MD11G1165600
293	MSTRG.144859.1	MD17G1220500;MD17G1220400;MD17G1220200;MD17G1220100;MD17G1220000;MD17G1221100;MD17G1220700;MD17G1219900;MD17G1221300;MD17G1221200;MD17G1220800;MD17G1220300;MD17G1220600
294	MSTRG.79142.1	MD10G1071400;MD10G1072300;MD10G1071900;MD10G1071800;MD10G1072400;MD10G1071200;MD10G1071100;MD10G1072000;MD10G1071300
295	MSTRG.21373.6	MD02G1294500;MD02G1293400;MD02G1295400;MD02G1293100;MD02G1293500;MD02G1294000;MD02G1295300;MD02G1295800;MD02G1293200;MD02G1293000;MD02G1294700;MD02G1295200;MD02G1295700;MD02G1293600;MD02G1293800;MD02G1295100;MD02G1294100;MD02G1293900;MD02G1293300;MD02G1294900;MD02G1294800;MD02G1295000;MD02G1295500;MD02G1294600;MD02G1292400;MD02G1294400;MD02G1292500;MD02G1294300
296	MSTRG.75751.1	MD09G1245800;MD09G1245900;MD09G1245500
297	MSTRG.77880.13	MD10G1032600;MD10G1032700;MD10G1032000;MD10G1033100;MD10G1032800;MD10G1031900;MD10G1033000;MD10G1032900;MD10G1033200
298	MSTRG.50551.1	MD06G1118500;MD06G1117600;MD06G1118000;MD06G1117100;MD06G1117900;MD06G1118100;MD06G1117300;MD06G1118200;MD06G1117200;MD06G1118600;MD06G1117700;MD06G1118400;MD06G1117400;MD06G1117500;MD06G1118700;MD06G1118300;MD06G1117800;MD06G1119300
299	MSTRG.135119.1	MD16G1184700;MD16G1185000;MD16G1184000;MD16G1184800;MD16G1185600;MD16G1185300;MD16G1184200;MD16G1184100;MD16G1185100;MD16G1184300;MD16G1185200;MD16G1184500;MD16G1185400;MD16G1185500
300	MSTRG.94328.2	MD11G1285700;MD11G1286100;MD11G1286500;MD11G1286200;MD11G1286400;MD11G1286000;MD11G1285900;MD11G1286300;MD11G1285800
301	MSTRG.107381.13	MD13G1191600;MD13G1191400;MD13G1191200;MD13G1191800;MD13G1190900;MD13G1191300;MD13G1191700;MD13G1191500
302	MSTRG.91493.7	MD11G1193000;MD11G1192900;MD11G1193300;MD11G1192700;MD11G1193200;MD11G1193500;MD11G1193400;MD11G1193100
303	MSTRG.68196.2	MD08G1222900;MD08G1222700;MD08G1222600;MD08G1223200;MD08G1222800;MD08G1222400;MD08G1222500;MD08G1223100
304	MSTRG.110696.4	MD13G1283300;MD13G1283100;MD13G1283400
305	MSTRG.71608.1	MD09G1114300;MD09G1114000;MD09G1113100;MD09G1113300;MD09G1112800;MD09G1113400;MD09G1112900;MD09G1113800;MD09G1114700;MD09G1114400;MD09G1113700;MD09G1112600;MD09G1113000;MD09G1113900;MD09G1114800;MD09G1114100;MD09G1112700;MD09G1113200;MD09G1113600;MD09G1114200
306	MSTRG.51286.1	MD06G1146000;MD06G1146200;MD06G1145300;MD06G1145900;MD06G1143300;MD06G1146100;MD06G1145100;MD06G1144100;MD06G1145500;MD06G1145000;MD06G1143500;MD06G1145600;MD06G1143700;MD06G1145800;MD06G1145200;MD06G1145400;MD06G1143600;MD06G1143400;MD06G1143000;MD06G1144000;MD06G1144300;MD06G1145700;MD06G1144200;MD06G1143900;MD06G1144800
307	MSTRG.83425.1	MD10G1211900;MD10G1210500;MD10G1210800;MD10G1210200;MD10G1211400;MD10G1211000;MD10G1212200;MD10G1210100;MD10G1211100;MD10G1210600;MD10G1210700;MD10G1210300;MD10G1211700;MD10G1211300;MD10G1211200;MD10G1210400;MD10G1210900
308	MSTRG.29390.15	MD03G1271900;MD03G1269600;MD03G1269800;MD03G1270400;MD03G1271500;MD03G1271100;MD03G1271300;MD03G1270200;MD03G1270500;MD03G1270100;MD03G1271400;MD03G1269000;MD03G1271600;MD03G1270300;MD03G1272200;MD03G1272000;MD03G1270700;MD03G1268800;MD03G1269400;MD03G1268900;MD03G1269900;MD03G1270800;MD03G1271700;MD03G1269700;MD03G1268700;MD03G1271800;MD03G1271200;MD03G1269500
309	MSTRG.33029.1	MD04G1094600;MD04G1094400;MD04G1094700
310	MSTRG.105536.2	MD13G1125100;MD13G1125500;MD13G1124800;MD13G1125800;MD13G1124200;MD13G1124900;MD13G1125300;MD13G1126300;MD13G1124500;MD13G1125000;MD13G1126200;MD13G1124300;MD13G1125400;MD13G1125700
311	MSTRG.78505.5	MD10G1054600;MD10G1055400;MD10G1054800;MD10G1054200;MD10G1054900;MD10G1054700;MD10G1055300;MD10G1055000;MD10G1055100;MD10G1055200;MD10G1054300;MD10G1054500;MD10G1055500
312	MSTRG.75757.2	MD09G1246300;MD09G1246400;MD09G1246100;MD09G1245800;MD09G1245500;MD09G1245900
313	MSTRG.421.2	MD00G1012600;MD00G1013300;MD00G1013600;MD00G1013500;MD00G1013800;MD00G1013700;MD00G1012700;MD00G1013900;MD00G1014100;MD00G1012900;MD00G1013000;MD00G1014000;MD00G1012800
314	MSTRG.73966.9	MD09G1200100;MD09G1199100;MD09G1199500;MD09G1199000;MD09G1199900;MD09G1199200;MD09G1199800;MD09G1199400;MD09G1199700;MD09G1200000;MD09G1198900;MD09G1199600;MD09G1200200
315	MSTRG.32834.3	MD04G1089300;MD04G1089500;MD04G1089200;MD04G1089400
316	MSTRG.80613.1	MD10G1112500;MD10G1112400;MD10G1112000;MD10G1112700;MD10G1112200;MD10G1112800;MD10G1112300;MD10G1112900;MD10G1112600
317	MSTRG.141314.35	MD17G1102900;MD17G1103000;MD17G1105100;MD17G1103300;MD17G1104000;MD17G1104800;MD17G1103800;MD17G1104900;MD17G1102800;MD17G1103400;MD17G1104500;MD17G1104600;MD17G1103900;MD17G1104400;MD17G1104300;MD17G1103700;MD17G1102700;MD17G1103100;MD17G1102600;MD17G1105000;MD17G1104700
318	MSTRG.110508.5	MD13G1279400;MD13G1279800
319	MSTRG.55499.1	MD07G1082500;MD07G1082000;MD07G1083000;MD07G1082800;MD07G1082200;MD07G1081900;MD07G1082900;MD07G1082400;MD07G1082700;MD07G1082600;MD07G1082100;MD07G1081800;MD07G1081700
320	MSTRG.93907.1	MD11G1271800;MD11G1272000;MD11G1271700;MD11G1271600;MD11G1271500;MD11G1272300;MD11G1271900;MD11G1272100
321	MSTRG.12413.5	MD01G1175200;MD01G1177000;MD01G1175100;MD01G1177100;MD01G1176700;MD01G1174800;MD01G1174700;MD01G1175300;MD01G1176600;MD01G1175000;MD01G1176500;MD01G1176400;MD01G1176900;MD01G1175500;MD01G1176300;MD01G1174900;MD01G1175600;MD01G1175400;MD01G1175700
322	MSTRG.64583.1	MD08G1108400;MD08G1109200;MD08G1110400;MD08G1110000;MD08G1109900;MD08G1108900;MD08G1109000;MD08G1108500;MD08G1110500;MD08G1110200;MD08G1108100;MD08G1109500;MD08G1110300;MD08G1108800;MD08G1108700;MD08G1109700;MD08G1110100;MD08G1108600;MD08G1109600;MD08G1108300;MD08G1109100;MD08G1109800
323	MSTRG.55562.5	MD07G1084300;MD07G1083900;MD07G1084600;MD07G1083700;MD07G1083800;MD07G1084500;MD07G1084200;MD07G1084100;MD07G1084000
324	MSTRG.9660.2	MD01G1068400;MD01G1068000;MD01G1067600;MD01G1067400;MD01G1068100;MD01G1067900;MD01G1068200;MD01G1068300;MD01G1067800;MD01G1067700;MD01G1067500
325	MSTRG.58857.18	MD07G1186300;MD07G1185400;MD07G1186600;MD07G1186000;MD07G1185500;MD07G1184800;MD07G1185900;MD07G1184700;MD07G1185600;MD07G1185800;MD07G1184900;MD07G1186500;MD07G1186400;MD07G1185000;MD07G1185300;MD07G1186100;MD07G1186200
326	MSTRG.83433.1	MD10G1210500;MD10G1211900;MD10G1212300;MD10G1212600;MD10G1210800;MD10G1212400;MD10G1212200;MD10G1211000;MD10G1211400;MD10G1210400;MD10G1210900;MD10G1211300;MD10G1211200;MD10G1211700;MD10G1210300;MD10G1210600;MD10G1211100;MD10G1210700
327	MSTRG.20557.1	MD02G1261500;MD02G1261400;MD02G1261700;MD02G1261800;MD02G1260800;MD02G1261200;MD02G1261300;MD02G1260900;MD02G1261600;MD02G1260700;MD02G1261100;MD02G1261000;MD02G1261900
328	MSTRG.51194.1	MD06G1141300;MD06G1139000;MD06G1140500;MD06G1141100;MD06G1141400;MD06G1141800;MD06G1140400;MD06G1138900;MD06G1141500;MD06G1140000;MD06G1139500;MD06G1141000;MD06G1138800;MD06G1141900;MD06G1141200;MD06G1139800;MD06G1139700;MD06G1140100;MD06G1139200;MD06G1139600;MD06G1140200;MD06G1140800;MD06G1140600;MD06G1141700
329	MSTRG.2378.1	MD00G1072400
330	MSTRG.87024.1	MD11G1016800;MD11G1017300;MD11G1018000;MD11G1017100;MD11G1018200;MD11G1017800;MD11G1017400;MD11G1017600;MD11G1017200;MD11G1016400;MD11G1018300;MD11G1017500;MD11G1016700;MD11G1016600;MD11G1018100
331	MSTRG.101190.1	MD12G1209100;MD12G1211200;MD12G1209700;MD12G1211000;MD12G1209300;MD12G1208500;MD12G1210800;MD12G1208400;MD12G1208900;MD12G1211100;MD12G1208600;MD12G1208300;MD12G1211300;MD12G1210900;MD12G1210700;MD12G1209800;MD12G1210600;MD12G1209500;MD12G1208800;MD12G1209000;MD12G1211400;MD12G1209400;MD12G1209600;MD12G1209200;MD12G1208700
332	MSTRG.22722.84	MD03G1034500;MD03G1032900;MD03G1032800;MD03G1034300;MD03G1034200;MD03G1032200;MD03G1033900;MD03G1032700;MD03G1032500;MD03G1032400;MD03G1033100;MD03G1033200;MD03G1034100;MD03G1033300;MD03G1032100;MD03G1033000;MD03G1032300;MD03G1034600;MD03G1033800;MD03G1034400;MD03G1032600
333	MSTRG.101502.2	MD12G1223700;MD12G1223000;MD12G1223600;MD12G1222600;MD12G1223400;MD12G1223900;MD12G1222000;MD12G1223800;MD12G1222300;MD12G1224200;MD12G1223200;MD12G1224100;MD12G1221900;MD12G1222200;MD12G1224000;MD12G1224300;MD12G1222100;MD12G1223500;MD12G1224500;MD12G1224400;MD12G1223300;MD12G1223100
334	MSTRG.113635.1	MD14G1094000;MD14G1094100;MD14G1094700;MD14G1094300;MD14G1094200;MD14G1094400;MD14G1094600;MD14G1094900
335	MSTRG.77329.1	MD10G1010600;MD10G1010300;MD10G1010700;MD10G1009900;MD10G1011100;MD10G1010800;MD10G1010500;MD10G1010200;MD10G1010100;MD10G1010000;MD10G1010900;MD10G1011000
336	MSTRG.108252.1	MD13G1217200;MD13G1217300;MD13G1217900;MD13G1216800;MD13G1217500;MD13G1216900;MD13G1217700;MD13G1217600;MD13G1217400
337	MSTRG.42808.1	MD05G1200600;MD05G1199600;MD05G1199200;MD05G1200200;MD05G1199400;MD05G1198900;MD05G1200800;MD05G1199900;MD05G1199700;MD05G1200100;MD05G1200300;MD05G1200700;MD05G1199000;MD05G1198700;MD05G1198800;MD05G1199100;MD05G1199300;MD05G1200000;MD05G1199500
338	MSTRG.111078.2	MD14G1006700;MD14G1005800;MD14G1006500;MD14G1006600;MD14G1005100;MD14G1006000;MD14G1005600;MD14G1006300;MD14G1006400;MD14G1005700;MD14G1005400;MD14G1005500;MD14G1006200;MD14G1005200;MD14G1005300;MD14G1006100
339	MSTRG.2047.2	MD00G1064500;MD00G1064400;MD00G1064100;MD00G1064200
340	MSTRG.61340.2	MD07G1291000;MD07G1290700;MD07G1291900;MD07G1291100;MD07G1291800;MD07G1291400;MD07G1291500;MD07G1291600;MD07G1291200;MD07G1291700;MD07G1291300
341	MSTRG.126319.1	MD15G1319600;MD15G1320200;MD15G1320300;MD15G1319800;MD15G1319900;MD15G1319500
342	MSTRG.59663.1	MD07G1217200;MD07G1217900;MD07G1217000;MD07G1217700;MD07G1217100;MD07G1218700;MD07G1218600;MD07G1218000;MD07G1216900;MD07G1218500;MD07G1218100;MD07G1216800;MD07G1218200;MD07G1217800;MD07G1218400;MD07G1218300
343	MSTRG.107868.1	MD13G1206500;MD13G1206200;MD13G1206700;MD13G1207000;MD13G1206000;MD13G1206900;MD13G1206800;MD13G1206100;MD13G1206600;MD13G1206400
344	MSTRG.48855.3	MD06G1064300;MD06G1064200
345	MSTRG.91105.2	MD11G1183200
346	MSTRG.70566.42	MD09G1070800;MD09G1070900;MD09G1071300;MD09G1071500;MD09G1070300;MD09G1071000;MD09G1072400;MD09G1071800;MD09G1071200;MD09G1072300;MD09G1070400;MD09G1070000;MD09G1072200;MD09G1070100;MD09G1069900;MD09G1071600;MD09G1070200;MD09G1069800;MD09G1069700;MD09G1071400;MD09G1071100;MD09G1070700
347	MSTRG.90826.7	MD11G1175800;MD11G1175100;MD11G1175200;MD11G1176200;MD11G1175300;MD11G1175900;MD11G1176000;MD11G1176100;MD11G1176300
348	MSTRG.146433.3	MD17G1278600;MD17G1278800;MD17G1279100;MD17G1278400;MD17G1279200;MD17G1278100;MD17G1278700;MD17G1278200;MD17G1279300;MD17G1279000;MD17G1278300;MD17G1277800;MD17G1278000;MD17G1277900;MD17G1278900;MD17G1278500
349	MSTRG.64078.1	MD08G1091500;MD08G1090800;MD08G1090000;MD08G1090300;MD08G1090200;MD08G1091200;MD08G1091600;MD08G1091000;MD08G1091700;MD08G1090900;MD08G1090400
350	MSTRG.19851.1	MD02G1232800;MD02G1233100;MD02G1233700;MD02G1232900;MD02G1234200;MD02G1234100;MD02G1233300;MD02G1233400;MD02G1233800;MD02G1234000;MD02G1233200;MD02G1233900;MD02G1233600;MD02G1232700
351	MSTRG.131697.3	MD16G1055600;MD16G1054800;MD16G1055000;MD16G1055200;MD16G1055300;MD16G1054100;MD16G1055700;MD16G1054300;MD16G1055800;MD16G1055100;MD16G1055400;MD16G1054200;MD16G1054400;MD16G1056100;MD16G1056000;MD16G1054700;MD16G1054600;MD16G1054900;MD16G1054500;MD16G1055900
352	MSTRG.74819.2	MD09G1220700
353	MSTRG.14972.55	MD02G1048800;MD02G1049300;MD02G1049700;MD02G1049800;MD02G1048700;MD02G1048000;MD02G1050100;MD02G1048900;MD02G1049000;MD02G1049600;MD02G1047900;MD02G1047300;MD02G1047800;MD02G1050000;MD02G1047500;MD02G1047600;MD02G1047200;MD02G1050200;MD02G1048400;MD02G1050300;MD02G1048300;MD02G1048100;MD02G1049400;MD02G1048200;MD02G1047700;MD02G1049500;MD02G1049900;MD02G1048600
354	MSTRG.89845.2	MD11G1147500;MD11G1148300;MD11G1147600;MD11G1147700;MD11G1147400;MD11G1147800;MD11G1148000;MD11G1147300;MD11G1148200;MD11G1148100;MD11G1147200
355	MSTRG.24806.8	MD03G1120300;MD03G1120200;MD03G1119500;MD03G1119800;MD03G1120000;MD03G1119700;MD03G1119900;MD03G1119400;MD03G1120400;MD03G1119600
356	MSTRG.46772.2	MD05G1363900;MD05G1364100;MD05G1364500;MD05G1364200;MD05G1364000;MD05G1363800;MD05G1364400
357	MSTRG.38232.1	MD05G1040300;MD05G1039800;MD05G1040100;MD05G1039700;MD05G1039900;MD05G1040200;MD05G1039600;MD05G1040000
358	MSTRG.45226.1	MD05G1295200;MD05G1293900;MD05G1293700;MD05G1294200;MD05G1293600;MD05G1294500;MD05G1294300;MD05G1293500;MD05G1293800;MD05G1294800;MD05G1294100;MD05G1294400;MD05G1294700;MD05G1295300;MD05G1294000;MD05G1295100;MD05G1295000
359	MSTRG.101260.1	MD12G1213600;MD12G1212000;MD12G1212300;MD12G1211900;MD12G1211600;MD12G1211800;MD12G1211400;MD12G1212100;MD12G1212500;MD12G1213000;MD12G1213800;MD12G1213500;MD12G1211700;MD12G1213200;MD12G1213700;MD12G1212800;MD12G1212900;MD12G1212600;MD12G1213100;MD12G1213400;MD12G1213300;MD12G1212200;MD12G1212400;MD12G1211500
360	MSTRG.126501.1	MD15G1325100;MD15G1325200;MD15G1325600;MD15G1324800;MD15G1325300;MD15G1325700;MD15G1324900;MD15G1325000
361	MSTRG.114847.1	MD14G1132600;MD14G1132500;MD14G1132300;MD14G1131900;MD14G1132000;MD14G1132200;MD14G1131500;MD14G1131300
362	MSTRG.21025.1	MD02G1278000;MD02G1279300;MD02G1278100;MD02G1278300;MD02G1279100;MD02G1278800;MD02G1279200;MD02G1278700;MD02G1278400;MD02G1278500;MD02G1278600;MD02G1278200;MD02G1279000;MD02G1278900
363	MSTRG.81868.9	MD10G1155800;MD10G1155200;MD10G1155500;MD10G1155700;MD10G1156300;MD10G1156000;MD10G1156200;MD10G1155100;MD10G1155400;MD10G1156100
364	MSTRG.33814.34	MD04G1123500;MD04G1123600;MD04G1123100;MD04G1123300;MD04G1123800;MD04G1123400;MD04G1124100;MD04G1123200;MD04G1123900
365	MSTRG.5636.1	MD00G1160300;MD00G1160400;MD00G1161100;MD00G1160600;MD00G1160900;MD00G1160500;MD00G1160700;MD00G1160800;MD00G1160200;MD00G1161000
366	MSTRG.45973.8	MD05G1328800;MD05G1329500;MD05G1329000;MD05G1329600;MD05G1330000;MD05G1330400;MD05G1330300;MD05G1331200;MD05G1329700;MD05G1331700;MD05G1332000;MD05G1329300;MD05G1329800;MD05G1331900;MD05G1331600;MD05G1328900;MD05G1329900;MD05G1329200;MD05G1328700;MD05G1332200;MD05G1331000;MD05G1330100;MD05G1330200;MD05G1330900;MD05G1331500;MD05G1330700;MD05G1331400;MD05G1328600;MD05G1330800;MD05G1331100;MD05G1332…
367	MSTRG.107586.8	MD13G1197200;MD13G1196800;MD13G1197300;MD13G1196900;MD13G1197000;MD13G1197600
368	MSTRG.28360.2	MD03G1230700;MD03G1230300;MD03G1230800;MD03G1229700;MD03G1230900;MD03G1229800;MD03G1229600;MD03G1230600;MD03G1230100;MD03G1229100;MD03G1229000;MD03G1230000;MD03G1230200;MD03G1229200
369	MSTRG.96779.1	MD12G1062300;MD12G1062600;MD12G1062900;MD12G1062100;MD12G1062200;MD12G1062500;MD12G1062000;MD12G1061600;MD12G1063000;MD12G1062400;MD12G1061700;MD12G1061900
370	MSTRG.22774.1	MD03G1037300;MD03G1035600;MD03G1037000;MD03G1035400;MD03G1037200;MD03G1035100;MD03G1036800;MD03G1036200;MD03G1036700;MD03G1037100;MD03G1036100;MD03G1034600;MD03G1036500;MD03G1035300;MD03G1036400;MD03G1035800;MD03G1035000;MD03G1036600;MD03G1034500;MD03G1036900;MD03G1034900;MD03G1035500;MD03G1034800;MD03G1036000
371	MSTRG.22594.142	MD03G1024400;MD03G1026700;MD03G1024900;MD03G1026600;MD03G1024500;MD03G1026500;MD03G1027000;MD03G1026300;MD03G1025200;MD03G1024800;MD03G1027200;MD03G1026900;MD03G1025100;MD03G1024600;MD03G1024700;MD03G1025000;MD03G1027100;MD03G1024300;MD03G1026800;MD03G1024200
372	MSTRG.41472.1	MD05G1142000;MD05G1140600;MD05G1141800;MD05G1140800;MD05G1139900;MD05G1140300;MD05G1141100;MD05G1140500;MD05G1141900;MD05G1140100;MD05G1141200;MD05G1141700;MD05G1140000;MD05G1140200;MD05G1140400;MD05G1141600;MD05G1141300;MD05G1140700;MD05G1141000;MD05G1140900
373	MSTRG.103661.5	MD13G1053800;MD13G1054200;MD13G1052600;MD13G1051400;MD13G1052900;MD13G1050700;MD13G1052800;MD13G1051300;MD13G1051200;MD13G1050900;MD13G1053700;MD13G1051500;MD13G1051000;MD13G1052700;MD13G1054100;MD13G1053200;MD13G1051700;MD13G1051800;MD13G1051100;MD13G1052000;MD13G1050600;MD13G1053100;MD13G1053000;MD13G1052100;MD13G1053400;MD13G1052200;MD13G1053500;MD13G1052500;MD13G1053600;MD13G1052300;MD13G1051…
374	MSTRG.18605.2	MD02G1194100;MD02G1193900;MD02G1194500;MD02G1194300;MD02G1194600;MD02G1194000;MD02G1194700
375	MSTRG.93044.3	MD11G1241400;MD11G1241700;MD11G1241800;MD11G1241000;MD11G1242400;MD11G1242300;MD11G1242200;MD11G1241900;MD11G1241600;MD11G1241500;MD11G1241100
376	MSTRG.99130.3	MD12G1132900;MD12G1133200;MD12G1133700;MD12G1132500;MD12G1132800;MD12G1133800;MD12G1133600;MD12G1133000;MD12G1133300;MD12G1132600
377	MSTRG.110405.2	MD13G1276400;MD13G1276300;MD13G1276600;MD13G1276500
378	MSTRG.141710.5	MD17G1120300;MD17G1119600;MD17G1119400;MD17G1119500;MD17G1120100;MD17G1120000;MD17G1119800;MD17G1119200;MD17G1119700;MD17G1119900;MD17G1120200
379	MSTRG.93823.1	MD11G1268800;MD11G1269300;MD11G1269500;MD11G1267200;MD11G1268900;MD11G1267300;MD11G1267600;MD11G1270100;MD11G1269600;MD11G1269400;MD11G1267700;MD11G1269700;MD11G1269800;MD11G1267100;MD11G1268700;MD11G1267400;MD11G1267500;MD11G1270000;MD11G1269200;MD11G1269900
380	MSTRG.37129.10	MD05G1005500;MD05G1005000;MD05G1005300;MD05G1004300;MD05G1005200;MD05G1004600;MD05G1004700;MD05G1004400;MD05G1004900;MD05G1005400;MD05G1004100;MD05G1005600
381	MSTRG.39066.1	MD05G1065100;MD05G1064900;MD05G1065000
382	MSTRG.14479.1	MD02G1028900;MD02G1027900;MD02G1028700;MD02G1027600;MD02G1029000;MD02G1028400;MD02G1027400;MD02G1027800;MD02G1028300;MD02G1027500;MD02G1027700;MD02G1029100;MD02G1028200;MD02G1028600;MD02G1028800;MD02G1028500;MD02G1027300;MD02G1028000;MD02G1029200;MD02G1028100
383	MSTRG.9474.1	MD01G1060700;MD01G1060600;MD01G1058400;MD01G1060400;MD01G1059600;MD01G1060900;MD01G1058800;MD01G1058300;MD01G1058900;MD01G1059900;MD01G1059100;MD01G1058500;MD01G1059200;MD01G1059000;MD01G1060300;MD01G1059800;MD01G1058600;MD01G1060200;MD01G1060500;MD01G1059300;MD01G1060800
384	MSTRG.30380.2	MD04G1008300;MD04G1008500;MD04G1009100;MD04G1009000;MD04G1008900;MD04G1008400;MD04G1009400;MD04G1009200;MD04G1008600;MD04G1008000;MD04G1009300;MD04G1008800;MD04G1008100;MD04G1008200
385	MSTRG.145038.1	MD17G1229000;MD17G1227000;MD17G1228000;MD17G1226700;MD17G1227400;MD17G1228700;MD17G1227100;MD17G1227900;MD17G1229100;MD17G1228900;MD17G1227800;MD17G1227600;MD17G1227300;MD17G1228800;MD17G1227200;MD17G1228400;MD17G1228300;MD17G1228500
386	MSTRG.13413.10	MD01G1221600;MD01G1221400;MD01G1221800;MD01G1221200;MD01G1221000;MD01G1220700;MD01G1220800;MD01G1220200;MD01G1220500;MD01G1220300;MD01G1220400;MD01G1220100;MD01G1220000
387	MSTRG.64503.2	MD08G1106500;MD08G1107300;MD08G1106800;MD08G1106400;MD08G1106300;MD08G1107400;MD08G1106900;MD08G1107100;MD08G1107000;MD08G1107500;MD08G1107200;MD08G1106600
388	MSTRG.28163.1	MD03G1222500;MD03G1222700;MD03G1222600;MD03G1222200;MD03G1222300;MD03G1222100;MD03G1222900;MD03G1222400
389	MSTRG.32482.1	MD04G1082800;MD04G1082700
390	MSTRG.140705.1	MD17G1080900;MD17G1080800;MD17G1080700;MD17G1080600;MD17G1079500;MD17G1079900;MD17G1081000;MD17G1079700;MD17G1079800;MD17G1080300;MD17G1079600;MD17G1080000;MD17G1081100;MD17G1081300;MD17G1080100;MD17G1079400
391	MSTRG.46175.3	MD05G1339000;MD05G1340900;MD05G1341100;MD05G1339400;MD05G1341600;MD05G1338900;MD05G1340000;MD05G1340700;MD05G1341000;MD05G1340800;MD05G1338800;MD05G1340300;MD05G1341200;MD05G1339200;MD05G1340100;MD05G1341300;MD05G1341400;MD05G1339100;MD05G1339500;MD05G1339600;MD05G1340400;MD05G1340600;MD05G1339300;MD05G1340200;MD05G1338700;MD05G1340500;MD05G1339700;MD05G1341500
392	MSTRG.79939.7	MD10G1091400;MD10G1091500;MD10G1091600;MD10G1091900
393	MSTRG.136696.1	MD16G1235900;MD16G1235700;MD16G1235500;MD16G1235800;MD16G1236000;MD16G1235600
394	MSTRG.24295.4	MD03G1101800;MD03G1101200;MD03G1099900;MD03G1100500;MD03G1100600;MD03G1100100;MD03G1100400;MD03G1101300;MD03G1101600;MD03G1099700;MD03G1101700;MD03G1101500;MD03G1100900;MD03G1100000;MD03G1100700;MD03G1101000;MD03G1100200;MD03G1099800
395	MSTRG.4153.26	MD00G1120300;MD00G1121500;MD00G1121300;MD00G1120400
396	MSTRG.31605.3	MD04G1054800;MD04G1055000;MD04G1054600;MD04G1055400;MD04G1055300;MD04G1054900;MD04G1054400;MD04G1055100
397	MSTRG.42120.1	MD05G1173600;MD05G1172100;MD05G1173200;MD05G1172300;MD05G1172200;MD05G1171800;MD05G1173000;MD05G1172600;MD05G1174200;MD05G1174000;MD05G1173900;MD05G1172000;MD05G1173700;MD05G1171600;MD05G1172700;MD05G1172500;MD05G1174300;MD05G1173400;MD05G1172900;MD05G1173800;MD05G1173100;MD05G1171900;MD05G1174500;MD05G1174400;MD05G1171700;MD05G1174100;MD05G1172400;MD05G1173300
398	MSTRG.140605.4	MD17G1075600;MD17G1075900;MD17G1075200;MD17G1076200;MD17G1076300;MD17G1076900;MD17G1076700;MD17G1075400;MD17G1076000;MD17G1075700;MD17G1077000;MD17G1075800;MD17G1075300;MD17G1076800;MD17G1076100
399	MSTRG.76533.2	MD09G1275400;MD09G1276200;MD09G1277000;MD09G1276000;MD09G1276300;MD09G1275900;MD09G1277400;MD09G1277800;MD09G1276400;MD09G1275700;MD09G1277500;MD09G1276900;MD09G1277600;MD09G1275500;MD09G1277300;MD09G1278100;MD09G1278000;MD09G1277700;MD09G1277900;MD09G1275600
400	MSTRG.78867.1	MD10G1064700;MD10G1065400;MD10G1065200;MD10G1064400;MD10G1065500;MD10G1065100;MD10G1065000;MD10G1064900;MD10G1065300;MD10G1064500;MD10G1064600
401	MSTRG.141819.3	MD17G1123700;MD17G1123800;MD17G1125600;MD17G1124100;MD17G1125100;MD17G1125300;MD17G1125400;MD17G1124600;MD17G1123900;MD17G1124200;MD17G1124900;MD17G1124800;MD17G1123500;MD17G1123600;MD17G1125000;MD17G1124400;MD17G1124500;MD17G1124000;MD17G1124700;MD17G1125500;MD17G1124300
402	MSTRG.55556.1	MD07G1083900;MD07G1083700;MD07G1083800;MD07G1083600;MD07G1084000
403	MSTRG.41634.1	MD05G1152000;MD05G1152700;MD05G1151300;MD05G1151500;MD05G1152900;MD05G1152500;MD05G1152200;MD05G1152100;MD05G1151600;MD05G1151800;MD05G1152600;MD05G1151900;MD05G1151400;MD05G1152300
404	MSTRG.54884.1	MD07G1057000;MD07G1056800;MD07G1057500;MD07G1056500;MD07G1057800;MD07G1056600;MD07G1056900;MD07G1057200;MD07G1056400;MD07G1057300;MD07G1057400;MD07G1057700;MD07G1056300;MD07G1057600;MD07G1057100;MD07G1057900
405	MSTRG.57707.1	MD07G1149800;MD07G1150500;MD07G1150000;MD07G1151000;MD07G1150300;MD07G1150600;MD07G1150700;MD07G1150200;MD07G1150100;MD07G1149900;MD07G1150900;MD07G1149500;MD07G1149600;MD07G1149700;MD07G1150800
406	MSTRG.120237.10	MD15G1100600;MD15G1100700;MD15G1100400;MD15G1101400;MD15G1100300;MD15G1100800;MD15G1101500;MD15G1101700
407	MSTRG.121086.6	MD15G1133900;MD15G1133800;MD15G1134500;MD15G1134700;MD15G1134600;MD15G1134100;MD15G1134300;MD15G1132600;MD15G1132800;MD15G1133400;MD15G1132500;MD15G1133000;MD15G1133100;MD15G1134800;MD15G1133200;MD15G1134400;MD15G1132900;MD15G1134000;MD15G1133300;MD15G1133600;MD15G1133700;MD15G1133500;MD15G1134200;MD15G1132700
408	MSTRG.137093.6	MD16G1245200;MD16G1245100;MD16G1245500;MD16G1245600;MD16G1244900;MD16G1245000
409	MSTRG.42291.2	MD05G1179300;MD05G1179800;MD05G1180500;MD05G1179600;MD05G1180100;MD05G1179400;MD05G1180200;MD05G1180600;MD05G1179500;MD05G1180400;MD05G1179200;MD05G1180300;MD05G1179000;MD05G1180700;MD05G1179100;MD05G1179900;MD05G1179700
410	MSTRG.65032.11	MD08G1125000;MD08G1124100;MD08G1124400;MD08G1124700;MD08G1124800;MD08G1123900;MD08G1124500;MD08G1124900;MD08G1124000;MD08G1123800;MD08G1125100;MD08G1124200;MD08G1124600
411	MSTRG.73966.2	MD09G1199400;MD09G1199800;MD09G1199500;MD09G1199100;MD09G1198800;MD09G1199900;MD09G1199200;MD09G1199000;MD09G1198900;MD09G1200000;MD09G1199600;MD09G1199700
412	MSTRG.139246.6	MD17G1014800;MD17G1015300;MD17G1015500;MD17G1015900;MD17G1017400;MD17G1016700;MD17G1016300;MD17G1017100;MD17G1016600;MD17G1017600;MD17G1016100;MD17G1015800;MD17G1015400;MD17G1016400;MD17G1016500;MD17G1015200;MD17G1016800;MD17G1017000;MD17G1015700;MD17G1016900;MD17G1014700;MD17G1017200;MD17G1017700;MD17G1017300;MD17G1017900;MD17G1016000;MD17G1015000;MD17G1015100;MD17G1017800;MD17G1016200;MD17G1015…
413	MSTRG.47591.17	MD06G1028800;MD06G1027100;MD06G1027200;MD06G1028300;MD06G1026500;MD06G1028700;MD06G1027300;MD06G1026900;MD06G1027500;MD06G1026700;MD06G1028400;MD06G1029000;MD06G1026600;MD06G1029100;MD06G1027400;MD06G1028500;MD06G1026800;MD06G1028600;MD06G1028900
414	MSTRG.93014.1	MD11G1240300;MD11G1240400;MD11G1241000;MD11G1240900;MD11G1240600;MD11G1240800;MD11G1240500;MD11G1241100
415	MSTRG.70838.2	MD09G1081500;MD09G1080800;MD09G1081200;MD09G1079700;MD09G1081300;MD09G1080500;MD09G1082200;MD09G1080400;MD09G1080700;MD09G1080100;MD09G1080200;MD09G1081700;MD09G1082100;MD09G1080600;MD09G1080000;MD09G1081000;MD09G1079600;MD09G1079900;MD09G1079800;MD09G1081400;MD09G1082000;MD09G1079500;MD09G1080900;MD09G1080300;MD09G1081800;MD09G1081600
416	MSTRG.125003.2	MD15G1278100;MD15G1279000;MD15G1278200;MD15G1278600;MD15G1278700;MD15G1278000
417	MSTRG.92392.2	MD11G1220800;MD11G1221100;MD11G1221600;MD11G1221300;MD11G1221000;MD11G1220100;MD11G1220200;MD11G1221200;MD11G1220900;MD11G1220000;MD11G1219900
418	MSTRG.141232.13	MD17G1101000;MD17G1101300;MD17G1101200;MD17G1099900;MD17G1101500;MD17G1100600;MD17G1101400;MD17G1100800;MD17G1101600;MD17G1100500;MD17G1100200;MD17G1100700;MD17G1099800;MD17G1102000;MD17G1100300;MD17G1100100;MD17G1101700;MD17G1100900;MD17G1100000
419	MSTRG.9691.2	MD01G1068600;MD01G1068300;MD01G1068900;MD01G1069400;MD01G1069600;MD01G1069800;MD01G1068400;MD01G1068800;MD01G1068500;MD01G1068700;MD01G1069200;MD01G1069100;MD01G1069300;MD01G1069500;MD01G1068200;MD01G1069700;MD01G1069000
420	MSTRG.115878.1	MD14G1168700;MD14G1167400;MD14G1168800;MD14G1167500;MD14G1168200;MD14G1168500;MD14G1167600;MD14G1167800;MD14G1167200;MD14G1168000;MD14G1168400;MD14G1167300;MD14G1167700;MD14G1168600;MD14G1168100;MD14G1168300;MD14G1167900
421	MSTRG.104711.7	MD13G1094900;MD13G1096300;MD13G1094600;MD13G1095900;MD13G1094700;MD13G1095300;MD13G1095800;MD13G1094300;MD13G1095100;MD13G1096000;MD13G1095000;MD13G1094500;MD13G1096500;MD13G1096400;MD13G1094200;MD13G1095500;MD13G1095600;MD13G1095200;MD13G1094400;MD13G1094800;MD13G1096200
422	MSTRG.63900.4	MD08G1084800;MD08G1084400;MD08G1083500;MD08G1084900;MD08G1084200;MD08G1083100;MD08G1083300;MD08G1084000;MD08G1082900;MD08G1083800;MD08G1082800;MD08G1084500;MD08G1084100;MD08G1083600;MD08G1082700;MD08G1083700;MD08G1083200
423	MSTRG.101293.1	MD12G1213100;MD12G1212600;MD12G1213400;MD12G1215100;MD12G1213300;MD12G1212400;MD12G1216500;MD12G1216000;MD12G1215600;MD12G1215800;MD12G1213200;MD12G1213500;MD12G1212800;MD12G1213700;MD12G1214900;MD12G1212900;MD12G1215700;MD12G1215900;MD12G1215400;MD12G1215500;MD12G1213800;MD12G1216200;MD12G1216600;MD12G1216400;MD12G1216300;MD12G1213600;MD12G1216100;MD12G1214800;MD12G1215200;MD12G1213000;MD12G1212…
424	MSTRG.76051.6	MD09G1257400;MD09G1257900;MD09G1257600;MD09G1258400;MD09G1257200;MD09G1257300;MD09G1258300;MD09G1258000;MD09G1257000;MD09G1258200;MD09G1258100;MD09G1257100
425	MSTRG.76186.2	MD09G1260600;MD09G1260500;MD09G1261800;MD09G1261700;MD09G1261600;MD09G1261200;MD09G1261400;MD09G1260800;MD09G1260700;MD09G1261000;MD09G1260900;MD09G1261100;MD09G1261500;MD09G1261900
426	MSTRG.128884.1	MD15G1393000;MD15G1392900;MD15G1392300;MD15G1392500;MD15G1392600;MD15G1393400;MD15G1392700;MD15G1393200;MD15G1392800;MD15G1392100;MD15G1393300
427	MSTRG.48362.2	MD06G1051900;MD06G1051400;MD06G1051800;MD06G1051500
428	MSTRG.98726.3	MD12G1120200;MD12G1119600;MD12G1120100;MD12G1119500;MD12G1120500;MD12G1119800;MD12G1120000;MD12G1120300;MD12G1119900;MD12G1120400;MD12G1119700;MD12G1120600
429	MSTRG.113127.1	MD14G1080400;MD14G1080000;MD14G1080800;MD14G1080700;MD14G1081100;MD14G1080500;MD14G1080200;MD14G1080900;MD14G1080100;MD14G1080300;MD14G1080600
430	MSTRG.15241.2	MD02G1065500;MD02G1065100;MD02G1064100;MD02G1064800;MD02G1063800;MD02G1064200;MD02G1064000;MD02G1065400;MD02G1064900;MD02G1064300;MD02G1065900;MD02G1063600;MD02G1065200;MD02G1065300;MD02G1063900;MD02G1065000;MD02G1065700;MD02G1065800;MD02G1065600
431	MSTRG.120648.1	MD15G1116600;MD15G1117900;MD15G1117100;MD15G1117200;MD15G1117600;MD15G1117400;MD15G1116500;MD15G1117800;MD15G1117700;MD15G1116900;MD15G1116800;MD15G1117000;MD15G1116700
432	MSTRG.90282.1	MD11G1162500;MD11G1162200;MD11G1161900;MD11G1162700;MD11G1162000;MD11G1162600;MD11G1162900;MD11G1162300;MD11G1162400;MD11G1162100;MD11G1162800
433	MSTRG.144385.1	MD17G1205200;MD17G1207200;MD17G1207500;MD17G1205300;MD17G1205900;MD17G1205600;MD17G1205800;MD17G1206200;MD17G1207400;MD17G1205400;MD17G1207100;MD17G1206300;MD17G1207700;MD17G1206800;MD17G1206900;MD17G1207300;MD17G1205700;MD17G1206100
434	MSTRG.24806.3	MD03G1119600;MD03G1119400;MD03G1120400;MD03G1120000;MD03G1119900;MD03G1119700;MD03G1120300;MD03G1120200;MD03G1119500;MD03G1119800
435	MSTRG.108599.3	MD13G1229400;MD13G1228900;MD13G1229300;MD13G1229600;MD13G1229100;MD13G1229500;MD13G1229700;MD13G1229900;MD13G1230200;MD13G1228700;MD13G1230100;MD13G1229200;MD13G1228600;MD13G1230000;MD13G1229800;MD13G1228800
436	MSTRG.65172.3	MD08G1129600;MD08G1130400;MD08G1129100;MD08G1130100;MD08G1129000;MD08G1130000;MD08G1128800;MD08G1129900;MD08G1128900;MD08G1129200;MD08G1129500;MD08G1129800;MD08G1129300;MD08G1130200
437	MSTRG.128895.2	MD15G1393400;MD15G1393200;MD15G1392700;MD15G1392800;MD15G1392100;MD15G1393300;MD15G1393000;MD15G1392200;MD15G1392900;MD15G1392300;MD15G1392500;MD15G1392600
438	MSTRG.142776.3	MD17G1157400;MD17G1156700;MD17G1156400;MD17G1156800;MD17G1156600;MD17G1156500;MD17G1157200;MD17G1157100;MD17G1157000;MD17G1156900;MD17G1157300
439	MSTRG.44388.1	MD05G1259100;MD05G1259600;MD05G1259200;MD05G1259800;MD05G1260400;MD05G1261500;MD05G1262200;MD05G1259400;MD05G1262000;MD05G1261900;MD05G1260600;MD05G1259500;MD05G1261800;MD05G1260200;MD05G1259900;MD05G1260300;MD05G1261200;MD05G1259300;MD05G1260000;MD05G1262100;MD05G1260100;MD05G1260500;MD05G1261100;MD05G1261300
440	MSTRG.66719.1	MD08G1176300;MD08G1176800;MD08G1176400;MD08G1177100;MD08G1176900;MD08G1177000;MD08G1177200;MD08G1176500;MD08G1176600
441	MSTRG.38331.1	MD05G1042000;MD05G1042400;MD05G1042500;MD05G1042200;MD05G1042300;MD05G1042100
442	MSTRG.100018.3	MD12G1165300;MD12G1165500;MD12G1166800;MD12G1167300;MD12G1165600;MD12G1164900;MD12G1166900;MD12G1165800;MD12G1165400;MD12G1166400;MD12G1167200;MD12G1166700;MD12G1164600;MD12G1167100;MD12G1166000;MD12G1165000;MD12G1164800;MD12G1167600;MD12G1166200;MD12G1164500;MD12G1165200;MD12G1166600;MD12G1166300;MD12G1167400;MD12G1165700;MD12G1164700;MD12G1164400
443	MSTRG.68373.4	MD08G1228500;MD08G1228400;MD08G1228200;MD08G1228900;MD08G1229600;MD08G1229400;MD08G1229200;MD08G1227800;MD08G1229500;MD08G1228600;MD08G1228100;MD08G1228700;MD08G1229300;MD08G1228000;MD08G1229700;MD08G1229000;MD08G1229900;MD08G1230300;MD08G1230000;MD08G1229100;MD08G1230200;MD08G1227900;MD08G1230100;MD08G1228300
444	MSTRG.28588.1	MD03G1237900;MD03G1237800;MD03G1237000;MD03G1238800;MD03G1237500;MD03G1237600;MD03G1238600;MD03G1237200;MD03G1238300;MD03G1237100;MD03G1238400;MD03G1238900;MD03G1237300;MD03G1238700;MD03G1237700;MD03G1238000
445	MSTRG.27164.3	MD03G1189600;MD03G1190300;MD03G1189200;MD03G1189700;MD03G1190100;MD03G1189100;MD03G1190000;MD03G1189900;MD03G1189800;MD03G1189400;MD03G1190200;MD03G1189500
446	MSTRG.108211.1	MD13G1215600;MD13G1215400;MD13G1215300;MD13G1216100;MD13G1215200;MD13G1215900;MD13G1215100;MD13G1215000;MD13G1215500;MD13G1216200;MD13G1215700
447	MSTRG.76347.1	MD09G1267200;MD09G1268000;MD09G1267600;MD09G1267300;MD09G1268200;MD09G1267500;MD09G1266700;MD09G1268400;MD09G1268700;MD09G1266600;MD09G1268100;MD09G1267100;MD09G1268300;MD09G1267400;MD09G1268500;MD09G1267900;MD09G1268600;MD09G1266800
448	MSTRG.57298.3	MD07G1138800;MD07G1138300;MD07G1137300;MD07G1138100;MD07G1137500;MD07G1138000;MD07G1139000;MD07G1137400;MD07G1137800;MD07G1137600;MD07G1139400;MD07G1138600;MD07G1139300;MD07G1139200;MD07G1137900;MD07G1139100;MD07G1138200
449	MSTRG.73199.1	MD09G1175600;MD09G1175800;MD09G1175200;MD09G1176000;MD09G1175400;MD09G1174900;MD09G1175100;MD09G1175000;MD09G1175700;MD09G1175500;MD09G1176100
450	MSTRG.77237.2	MD10G1005200;MD10G1006400;MD10G1004900;MD10G1005100;MD10G1006100;MD10G1006300;MD10G1006600;MD10G1005000;MD10G1005400;MD10G1005800;MD10G1005900;MD10G1006000;MD10G1005600;MD10G1005500;MD10G1006500;MD10G1005700
451	MSTRG.48218.1	MD06G1046900;MD06G1045900;MD06G1046200;MD06G1046500;MD06G1046700;MD06G1045700;MD06G1046000;MD06G1046600;MD06G1047000;MD06G1046100;MD06G1045600;MD06G1046300;MD06G1045800
452	MSTRG.45628.2	MD05G1312100;MD05G1311000;MD05G1310800;MD05G1311300;MD05G1312400;MD05G1310900;MD05G1311700;MD05G1312000;MD05G1311800;MD05G1311200;MD05G1311600;MD05G1311100;MD05G1312300;MD05G1311900;MD05G1312200;MD05G1310700;MD05G1311500;MD05G1311400
453	MSTRG.16719.1	MD02G1130500;MD02G1128700;MD02G1129300;MD02G1131100;MD02G1129800;MD02G1129900;MD02G1129000;MD02G1130700;MD02G1129400;MD02G1129500;MD02G1130800;MD02G1130400;MD02G1131400;MD02G1131200;MD02G1129600;MD02G1131000;MD02G1130100;MD02G1128600;MD02G1129700;MD02G1130900;MD02G1130000;MD02G1130200;MD02G1129200;MD02G1129100;MD02G1128400
454	MSTRG.146372.84	MD17G1276700;MD17G1274300;MD17G1275300;MD17G1274500;MD17G1275100;MD17G1276600;MD17G1276500;MD17G1275900;MD17G1275800;MD17G1274800;MD17G1274100;MD17G1277500;MD17G1274600;MD17G1277100;MD17G1275500;MD17G1276000;MD17G1276200;MD17G1275400;MD17G1274900;MD17G1277300;MD17G1276400;MD17G1275600;MD17G1274400;MD17G1277400;MD17G1276900;MD17G1275000;MD17G1275200;MD17G1274200;MD17G1277000;MD17G1277600;MD17G1277…
455	MSTRG.132166.1	MD16G1075200;MD16G1074500;MD16G1075800;MD16G1074300;MD16G1075100;MD16G1076600;MD16G1076000;MD16G1076200;MD16G1075000;MD16G1076300;MD16G1074700;MD16G1075300;MD16G1076400;MD16G1074900;MD16G1075900;MD16G1076100;MD16G1074600;MD16G1075700;MD16G1074800;MD16G1074400
456	MSTRG.100933.2	MD12G1200600;MD12G1198600;MD12G1200200;MD12G1199200;MD12G1200400;MD12G1200000;MD12G1199800;MD12G1198900;MD12G1199000;MD12G1199700;MD12G1200300;MD12G1199400;MD12G1199600;MD12G1199300;MD12G1198800;MD12G1200500;MD12G1199100;MD12G1199500;MD12G1200100;MD12G1199900;MD12G1200800
457	MSTRG.45941.1	MD05G1329000;MD05G1326900;MD05G1328700;MD05G1329500;MD05G1329900;MD05G1328800;MD05G1329200;MD05G1328900;MD05G1327200;MD05G1328000;MD05G1327500;MD05G1327000;MD05G1329700;MD05G1328200;MD05G1328400;MD05G1328100;MD05G1328600;MD05G1326600;MD05G1329600;MD05G1330000;MD05G1327800;MD05G1326700;MD05G1329800;MD05G1328300;MD05G1328500;MD05G1329300;MD05G1327900;MD05G1327100;MD05G1329100;MD05G1327700;MD05G1327…
458	MSTRG.19107.1	MD02G1210200;MD02G1210100;MD02G1209900
459	MSTRG.32655.2	MD04G1087200;MD04G1087100;MD04G1087300;MD04G1087000
460	MSTRG.71974.20	MD09G1130200;MD09G1129500;MD09G1130000;MD09G1130900;MD09G1129800;MD09G1132100;MD09G1130700;MD09G1131300;MD09G1132200;MD09G1129600;MD09G1130600;MD09G1131900;MD09G1133200;MD09G1132600;MD09G1132300;MD09G1131800;MD09G1129700;MD09G1132400;MD09G1130400;MD09G1132500;MD09G1131400;MD09G1132900;MD09G1132700;MD09G1130100;MD09G1133000;MD09G1131700;MD09G1130300;MD09G1129900
461	MSTRG.17430.4	MD02G1159100;MD02G1158400;MD02G1157200;MD02G1158500;MD02G1157300;MD02G1157800;MD02G1157500;MD02G1158300;MD02G1157700;MD02G1158700;MD02G1158600;MD02G1157600
462	MSTRG.19867.4	MD02G1235600;MD02G1233800;MD02G1234000;MD02G1236300;MD02G1233900;MD02G1235800;MD02G1235700;MD02G1235500;MD02G1236000;MD02G1236100;MD02G1233700;MD02G1234200;MD02G1236200;MD02G1234100;MD02G1235900
463	MSTRG.95086.1	MD12G1002300;MD12G1002000;MD12G1002200;MD12G1001800;MD12G1001700;MD12G1001900;MD12G1002600;MD12G1002700;MD12G1001600;MD12G1002100;MD12G1002500;MD12G1001500;MD12G1002400
464	MSTRG.35007.4	MD04G1168600;MD04G1168900;MD04G1168500;MD04G1169200;MD04G1168700;MD04G1169800;MD04G1169500;MD04G1168800;MD04G1169300;MD04G1169600;MD04G1169400
465	MSTRG.48440.2	MD06G1052400;MD06G1052900;MD06G1052800;MD06G1053200;MD06G1052700;MD06G1053100;MD06G1053000;MD06G1052500
466	MSTRG.67712.2	MD08G1205900;MD08G1205800;MD08G1205300;MD08G1205700;MD08G1205100;MD08G1205600;MD08G1206300;MD08G1206100;MD08G1205500;MD08G1205200;MD08G1206200
467	MSTRG.119883.1	MD15G1085700;MD15G1086500;MD15G1085800;MD15G1086000;MD15G1087100;MD15G1087300;MD15G1087200;MD15G1085900;MD15G1087400;MD15G1087000;MD15G1085600;MD15G1086200;MD15G1085500;MD15G1086700;MD15G1086100;MD15G1086600;MD15G1086800
468	MSTRG.110145.2	MD13G1269900;MD13G1270000;MD13G1270400
469	MSTRG.37476.1	MD05G1015500;MD05G1016400;MD05G1015200;MD05G1016600;MD05G1015800;MD05G1014900;MD05G1015900;MD05G1016700;MD05G1016800;MD05G1015400;MD05G1016500;MD05G1016200;MD05G1016000
470	MSTRG.77946.27	MD10G1034900;MD10G1034600;MD10G1034800;MD10G1034300;MD10G1034100;MD10G1034200;MD10G1035600;MD10G1035700;MD10G1034400;MD10G1034700;MD10G1035400;MD10G1035800;MD10G1035300
471	MSTRG.82687.1	MD10G1185100;MD10G1184300;MD10G1184700;MD10G1184800;MD10G1185000;MD10G1184400;MD10G1184600;MD10G1184500
472	MSTRG.139860.2	MD17G1044400;MD17G1045400;MD17G1045700;MD17G1044500;MD17G1044300;MD17G1044200;MD17G1046100;MD17G1045500;MD17G1046000;MD17G1045600;MD17G1044100;MD17G1044600;MD17G1046300;MD17G1046200;MD17G1044800;MD17G1046400;MD17G1044000;MD17G1045900;MD17G1045300;MD17G1044700
473	MSTRG.1781.1	MD00G1055300;MD00G1055100;MD00G1055200
474	MSTRG.67675.1	MD08G1205200;MD08G1205500;MD08G1204700;MD08G1204200;MD08G1204900;MD08G1204600;MD08G1204300;MD08G1205000;MD08G1205100;MD08G1205300;MD08G1204500;MD08G1204400;MD08G1204800
475	MSTRG.139420.4	MD17G1023300;MD17G1026200;MD17G1023400;MD17G1025800;MD17G1023900;MD17G1026100;MD17G1023500;MD17G1026000;MD17G1026600;MD17G1025900;MD17G1023100;MD17G1025200;MD17G1025300;MD17G1026700;MD17G1026500;MD17G1024500;MD17G1025700;MD17G1024300;MD17G1024000;MD17G1025400;MD17G1025500;MD17G1024200;MD17G1023600;MD17G1023700;MD17G1025600;MD17G1026400;MD17G1024100;MD17G1024400;MD17G1026300;MD17G1023800
476	MSTRG.47034.1	MD06G1008900;MD06G1008500;MD06G1007700;MD06G1008600;MD06G1008700;MD06G1007800;MD06G1008300;MD06G1008400;MD06G1008100
477	MSTRG.22975.1	MD03G1044200;MD03G1044100;MD03G1045200;MD03G1044600;MD03G1044300;MD03G1045400;MD03G1044400;MD03G1045000;MD03G1045100;MD03G1045500;MD03G1045700;MD03G1045600;MD03G1044000;MD03G1044900;MD03G1044500
478	MSTRG.78569.1	MD10G1057200;MD10G1057300;MD10G1056300;MD10G1056000;MD10G1055800;MD10G1056200;MD10G1057600;MD10G1057100;MD10G1056700;MD10G1057400;MD10G1057000;MD10G1056800;MD10G1056600;MD10G1056100;MD10G1056500;MD10G1056900;MD10G1055900
479	MSTRG.102223.1	MD12G1256600;MD12G1255600;MD12G1258700;MD12G1256800;MD12G1258200;MD12G1256400;MD12G1258000;MD12G1257700;MD12G1257400;MD12G1257300;MD12G1258500;MD12G1258600;MD12G1256300;MD12G1255500;MD12G1255700;MD12G1255800;MD12G1258100;MD12G1256700;MD12G1256100;MD12G1258400;MD12G1255900;MD12G1258800;MD12G1255400;MD12G1257800;MD12G1257600;MD12G1256000;MD12G1256200;MD12G1257000;MD12G1256900;MD12G1256500;MD12G1257…
480	MSTRG.127049.1	MD15G1341400;MD15G1341600;MD15G1341500
481	MSTRG.14802.12	MD02G1041200;MD02G1040500;MD02G1040800;MD02G1042000;MD02G1041700;MD02G1040400;MD02G1041300;MD02G1042300;MD02G1042100;MD02G1040600;MD02G1041600;MD02G1042400;MD02G1042200;MD02G1040900;MD02G1041100;MD02G1041000
482	MSTRG.4375.1	MD00G1127700;MD00G1127500;MD00G1127600;MD00G1127800
483	MSTRG.82468.1	MD10G1177200;MD10G1178000;MD10G1177600;MD10G1176800;MD10G1177300;MD10G1176900;MD10G1177500;MD10G1177900;MD10G1178100;MD10G1176700;MD10G1177100;MD10G1177400;MD10G1177800;MD10G1177000
484	MSTRG.64325.1	MD08G1102200;MD08G1101800;MD08G1101600;MD08G1101500;MD08G1101100;MD08G1102100;MD08G1102500;MD08G1102600;MD08G1102000;MD08G1101400;MD08G1101200;MD08G1101700;MD08G1102400;MD08G1102300;MD08G1101900
485	MSTRG.63717.2	MD08G1074400;MD08G1075000;MD08G1074600;MD08G1075600;MD08G1076000;MD08G1074700;MD08G1074500;MD08G1075100;MD08G1075700;MD08G1075400;MD08G1075300;MD08G1075200;MD08G1075500;MD08G1075800
486	MSTRG.125358.1	MD15G1290900;MD15G1289100;MD15G1289400;MD15G1290500;MD15G1290300;MD15G1289900;MD15G1288900;MD15G1289800;MD15G1289200;MD15G1289700;MD15G1289500;MD15G1290600;MD15G1289600;MD15G1289300;MD15G1288800;MD15G1289000;MD15G1290400;MD15G1290700
487	MSTRG.62635.1	MD08G1035400;MD08G1033400;MD08G1032900;MD08G1034300;MD08G1033100;MD08G1034200;MD08G1033800;MD08G1032800;MD08G1033300;MD08G1035000;MD08G1034500;MD08G1034800;MD08G1033700;MD08G1035300;MD08G1034600;MD08G1035500;MD08G1034400;MD08G1033200;MD08G1033600;MD08G1034000;MD08G1033900;MD08G1035200;MD08G1033500;MD08G1033000
488	MSTRG.40485.1	MD05G1108400;MD05G1108100;MD05G1108200;MD05G1108600;MD05G1108700;MD05G1107900;MD05G1108300;MD05G1108500;MD05G1108000
489	MSTRG.56716.14	MD07G1123000;MD07G1122200;MD07G1122400;MD07G1122300;MD07G1122500;MD07G1122900
490	MSTRG.56076.8	MD07G1101700;MD07G1101800;MD07G1102000;MD07G1102500;MD07G1101900;MD07G1102200;MD07G1102300;MD07G1102400
491	MSTRG.68108.1	MD08G1221100;MD08G1219700;MD08G1219500;MD08G1221500;MD08G1221400;MD08G1221200;MD08G1220400;MD08G1221600;MD08G1220800;MD08G1220600;MD08G1220000;MD08G1220700;MD08G1220200;MD08G1219800;MD08G1219600;MD08G1221000;MD08G1220500;MD08G1220900;MD08G1220100;MD08G1221300
492	MSTRG.99548.11	MD12G1147300;MD12G1147400;MD12G1148000;MD12G1147500;MD12G1147100;MD12G1147200;MD12G1147900;MD12G1147000;MD12G1147700
493	MSTRG.24839.3	MD03G1120700;MD03G1121000;MD03G1121800;MD03G1121700;MD03G1121500;MD03G1121600;MD03G1120600;MD03G1120900;MD03G1121400;MD03G1121300;MD03G1120800
494	MSTRG.51372.1	MD06G1148900;MD06G1147800;MD06G1148600;MD06G1148500;MD06G1148200;MD06G1148400;MD06G1149100;MD06G1149200;MD06G1149400;MD06G1148000;MD06G1147900;MD06G1149300;MD06G1149000;MD06G1148700;MD06G1148800
495	MSTRG.27480.3	MD03G1200300;MD03G1200000;MD03G1200200;MD03G1200400;MD03G1200700;MD03G1200900;MD03G1199100;MD03G1199500;MD03G1199400;MD03G1199900;MD03G1199200;MD03G1199600;MD03G1199800;MD03G1200100;MD03G1201000;MD03G1200500;MD03G1200800;MD03G1200600
496	MSTRG.57585.3	MD07G1147200;MD07G1147500;MD07G1147600;MD07G1147000;MD07G1147300;MD07G1147400;MD07G1146900;MD07G1147700
497	MSTRG.56716.17	MD07G1123000;MD07G1122800;MD07G1122400;MD07G1122300;MD07G1122200;MD07G1122900;MD07G1122500
498	MSTRG.32441.1	MD04G1081400;MD04G1082100;MD04G1081700;MD04G1082300;MD04G1081900;MD04G1081600;MD04G1082000;MD04G1081800;MD04G1081500
499	MSTRG.144656.1	MD17G1213200;MD17G1213500;MD17G1212900;MD17G1213700;MD17G1213400;MD17G1214600;MD17G1214500;MD17G1214400;MD17G1212800;MD17G1214100;MD17G1213300;MD17G1213600;MD17G1213000;MD17G1213800;MD17G1214300;MD17G1214900;MD17G1214200;MD17G1213900;MD17G1213100;MD17G1215000
500	MSTRG.144165.4	MD17G1198100;MD17G1198400;MD17G1198700;MD17G1198500;MD17G1198800;MD17G1198300;MD17G1198900
501	MSTRG.103277.2	MD13G1038400;MD13G1036100;MD13G1037100;MD13G1035800;MD13G1035600;MD13G1036700;MD13G1038900;MD13G1035400;MD13G1038100;MD13G1037900;MD13G1037600;MD13G1036400;MD13G1037300;MD13G1035500;MD13G1036900;MD13G1037800;MD13G1036200;MD13G1036300;MD13G1038700;MD13G1038200;MD13G1038500;MD13G1037000;MD13G1037400;MD13G1035900;MD13G1037200;MD13G1036000;MD13G1038800;MD13G1036800;MD13G1039300;MD13G1036600;MD13G1036…
502	MSTRG.133317.3	MD16G1122200;MD16G1121200;MD16G1121700;MD16G1120900;MD16G1121000;MD16G1122900;MD16G1122300;MD16G1121100;MD16G1121800;MD16G1122000;MD16G1121900;MD16G1121600;MD16G1122400;MD16G1122100
503	MSTRG.20815.1	MD02G1270400;MD02G1270600;MD02G1271600;MD02G1271300;MD02G1271100;MD02G1271500;MD02G1270900;MD02G1271200;MD02G1270700;MD02G1272300;MD02G1271900;MD02G1270200;MD02G1271700;MD02G1270100;MD02G1271000;MD02G1270000;MD02G1270300;MD02G1272100;MD02G1272000;MD02G1271800;MD02G1272200;MD02G1271400;MD02G1270800
504	MSTRG.94647.1	MD11G1299600;MD11G1298600;MD11G1299900;MD11G1299800;MD11G1298500;MD11G1300700;MD11G1301100;MD11G1300800;MD11G1300400;MD11G1300200;MD11G1299500;MD11G1298700;MD11G1298900;MD11G1301000;MD11G1298800;MD11G1301200;MD11G1299200;MD11G1300000;MD11G1300500;MD11G1299000;MD11G1299100;MD11G1300300;MD11G1299700;MD11G1298400;MD11G1298300
505	MSTRG.35078.2	MD04G1170800;MD04G1171500;MD04G1170700;MD04G1171600;MD04G1171700;MD04G1171400;MD04G1172000;MD04G1172200;MD04G1171300;MD04G1171800;MD04G1170900;MD04G1171900
506	MSTRG.108819.1	MD13G1236700;MD13G1236300;MD13G1236600;MD13G1236500
507	MSTRG.28838.1	MD03G1246200;MD03G1247100;MD03G1246900;MD03G1247600;MD03G1246100;MD03G1247500;MD03G1247400;MD03G1247700;MD03G1246800;MD03G1246300;MD03G1246600;MD03G1246000;MD03G1247800;MD03G1246700
508	MSTRG.44682.12	MD05G1274600;MD05G1271100;MD05G1270900;MD05G1271800;MD05G1272100;MD05G1274500;MD05G1271000;MD05G1272400;MD05G1271600;MD05G1273700;MD05G1274300;MD05G1271700;MD05G1274000;MD05G1273900;MD05G1271500;MD05G1274100;MD05G1273800;MD05G1272300;MD05G1274200;MD05G1273300;MD05G1271300;MD05G1271400;MD05G1271200;MD05G1272000;MD05G1274400;MD05G1270800;MD05G1272500
509	MSTRG.14754.47	MD02G1038600;MD02G1038400;MD02G1039300;MD02G1039500;MD02G1038700;MD02G1039900;MD02G1039600;MD02G1039200;MD02G1038500;MD02G1038900;MD02G1039000;MD02G1039700;MD02G1039800;MD02G1039100;MD02G1038300;MD02G1039400;MD02G1040000
510	MSTRG.81815.1	MD10G1153600;MD10G1153500;MD10G1154300;MD10G1154000;MD10G1153700;MD10G1154600;MD10G1153900;MD10G1153300;MD10G1154200;MD10G1154400;MD10G1153100;MD10G1154100;MD10G1153800;MD10G1154500;MD10G1153200;MD10G1153400
511	MSTRG.73745.3	MD09G1193200;MD09G1193000;MD09G1192500;MD09G1192300;MD09G1192600;MD09G1192800;MD09G1193100;MD09G1192900;MD09G1192200;MD09G1192700
512	MSTRG.138747.1	MD16G1284100;MD16G1284400
513	MSTRG.120783.3	MD15G1121900;MD15G1123300;MD15G1123100;MD15G1122000;MD15G1122800;MD15G1122100;MD15G1122600;MD15G1122300;MD15G1123700;MD15G1122900;MD15G1123000;MD15G1123400;MD15G1122700;MD15G1123200;MD15G1122400
514	MSTRG.3181.20	MD00G1093400;MD00G1093600;MD00G1092900;MD00G1093500;MD00G1093200;MD00G1092800;MD00G1093900;MD00G1094000;MD00G1093000;MD00G1092500;MD00G1093700;MD00G1092600;MD00G1093300;MD00G1092700;MD00G1094100
515	MSTRG.56185.1	MD07G1107700;MD07G1107400;MD07G1107800;MD07G1107900;MD07G1107600
516	MSTRG.121787.1	MD15G1159800;MD15G1159900;MD15G1159000;MD15G1159200;MD15G1158900;MD15G1159600;MD15G1158700;MD15G1159300;MD15G1158800;MD15G1159400;MD15G1159700;MD15G1159500;MD15G1160000
517	MSTRG.19978.1	MD02G1240700;MD02G1240400;MD02G1239400;MD02G1239300;MD02G1240900;MD02G1239500;MD02G1240000;MD02G1239900;MD02G1240300;MD02G1240800;MD02G1239700;MD02G1240200;MD02G1239800;MD02G1239200;MD02G1239600;MD02G1240600;MD02G1240500
518	MSTRG.43681.1	MD05G1232200;MD05G1231100;MD05G1232000;MD05G1231900;MD05G1233000;MD05G1232500;MD05G1232900;MD05G1232300;MD05G1232700;MD05G1232800;MD05G1231000;MD05G1232400;MD05G1231800;MD05G1230700;MD05G1231600;MD05G1231500;MD05G1230900;MD05G1232100;MD05G1230400;MD05G1230600;MD05G1232600;MD05G1230800;MD05G1231700
519	MSTRG.40370.1	MD05G1103500;MD05G1103800;MD05G1103900;MD05G1103700;MD05G1103600
520	MSTRG.145325.1	MD17G1238800;MD17G1237600;MD17G1237400;MD17G1237700;MD17G1238700;MD17G1237800;MD17G1238600;MD17G1238400;MD17G1238500;MD17G1238200;MD17G1237500;MD17G1237300;MD17G1238100;MD17G1238000;MD17G1237900
521	MSTRG.45942.1	MD05G1327600;MD05G1329100;MD05G1327700;MD05G1327900;MD05G1327100;MD05G1329800;MD05G1326700;MD05G1328300;MD05G1328500;MD05G1329300;MD05G1327800;MD05G1330000;MD05G1329600;MD05G1327500;MD05G1328000;MD05G1327000;MD05G1327200;MD05G1326600;MD05G1328600;MD05G1328100;MD05G1329700;MD05G1328400;MD05G1328200;MD05G1329200;MD05G1329900;MD05G1328800;MD05G1328900;MD05G1329000;MD05G1328700;MD05G1329500;MD05G1326…
522	MSTRG.108301.1	MD13G1219100;MD13G1218400;MD13G1218500;MD13G1218900;MD13G1218700;MD13G1218800;MD13G1219000
523	MSTRG.89318.2	MD11G1126100;MD11G1126500;MD11G1126000;MD11G1126200;MD11G1124900;MD11G1125100;MD11G1125800;MD11G1124800;MD11G1125200;MD11G1125500;MD11G1125700;MD11G1126400;MD11G1125900;MD11G1125000
524	MSTRG.97828.1	MD12G1096200;MD12G1096100;MD12G1096000;MD12G1096300;MD12G1096400
525	MSTRG.108717.1	MD13G1233500;MD13G1234400;MD13G1233800;MD13G1233600;MD13G1232900;MD13G1233400;MD13G1233000;MD13G1234200;MD13G1233300;MD13G1233100;MD13G1233200
526	MSTRG.33649.2	MD04G1116800;MD04G1117800;MD04G1117200;MD04G1117500;MD04G1116700;MD04G1116500;MD04G1117600;MD04G1117700;MD04G1117000;MD04G1116200;MD04G1117400;MD04G1116400;MD04G1116300;MD04G1116900
527	MSTRG.79497.1	MD10G1080500;MD10G1080100;MD10G1080800;MD10G1080700;MD10G1080600;MD10G1080400
528	MSTRG.133038.2	MD16G1110700;MD16G1110300;MD16G1113000;MD16G1110200;MD16G1111400;MD16G1113100;MD16G1110800;MD16G1111100;MD16G1113300;MD16G1111300;MD16G1112100;MD16G1112200;MD16G1112000;MD16G1111000;MD16G1111700;MD16G1111800;MD16G1112700;MD16G1112600;MD16G1110400;MD16G1111200;MD16G1112400;MD16G1112800;MD16G1112900;MD16G1111500;MD16G1111900;MD16G1110600;MD16G1113200;MD16G1112300;MD16G1110900;MD16G1111600;MD16G1110…
529	MSTRG.41851.1	MD05G1162500;MD05G1163100;MD05G1163300;MD05G1162900;MD05G1163600;MD05G1163000;MD05G1162800;MD05G1163400;MD05G1162200;MD05G1162300;MD05G1163200;MD05G1163700;MD05G1162400;MD05G1162600;MD05G1163500
530	MSTRG.137052.10	MD16G1244300;MD16G1244200;MD16G1243500;MD16G1244100;MD16G1243900;MD16G1243400;MD16G1243600;MD16G1244000
531	MSTRG.5128.3	MD00G1147100;MD00G1147300;MD00G1146900;MD00G1147700;MD00G1147600;MD00G1147800;MD00G1147000;MD00G1147200
532	MSTRG.97554.1	MD12G1089400;MD12G1090000;MD12G1089700;MD12G1089600;MD12G1089900;MD12G1089500;MD12G1089800
533	MSTRG.33331.7	MD04G1101700;MD04G1101600;MD04G1100900;MD04G1101000;MD04G1101800;MD04G1101400;MD04G1101500;MD04G1101300
534	MSTRG.70554.1	MD09G1071000;MD09G1070300;MD09G1070500;MD09G1069400;MD09G1071300;MD09G1070900;MD09G1070800;MD09G1071100;MD09G1070700;MD09G1069700;MD09G1070200;MD09G1069800;MD09G1069500;MD09G1069600;MD09G1069900;MD09G1070400;MD09G1070000;MD09G1070600;MD09G1071200
535	MSTRG.8179.1	MD01G1023400;MD01G1024200;MD01G1023000;MD01G1023900;MD01G1023100;MD01G1023800;MD01G1023300;MD01G1024100;MD01G1023200;MD01G1023500;MD01G1022800
536	MSTRG.39897.1	MD05G1088400;MD05G1088500;MD05G1087800;MD05G1087700;MD05G1088300;MD05G1089300;MD05G1088900;MD05G1089200;MD05G1089500;MD05G1088700;MD05G1089000;MD05G1088200;MD05G1088100;MD05G1088600;MD05G1087900
537	MSTRG.99112.2	MD12G1131600;MD12G1132900;MD12G1131700;MD12G1131500;MD12G1132100;MD12G1131800;MD12G1131400;MD12G1132000;MD12G1132800;MD12G1132500;MD12G1132300;MD12G1132400;MD12G1131900;MD12G1132600
538	MSTRG.139861.2	MD17G1045500;MD17G1046100;MD17G1044200;MD17G1045600;MD17G1046000;MD17G1044100;MD17G1044400;MD17G1045400;MD17G1045700;MD17G1044500;MD17G1044300;MD17G1044000;MD17G1045900;MD17G1045300;MD17G1044700;MD17G1044600;MD17G1046300;MD17G1044800;MD17G1046200;MD17G1046400
539	MSTRG.74403.5	MD09G1211700;MD09G1210700;MD09G1211300;MD09G1210900;MD09G1210600;MD09G1211800;MD09G1211500;MD09G1212000;MD09G1211600;MD09G1211100;MD09G1210500;MD09G1211000;MD09G1211900;MD09G1210800
540	MSTRG.70850.1	MD09G1082500;MD09G1079900;MD09G1082600;MD09G1082000;MD09G1081400;MD09G1082300;MD09G1079800;MD09G1081800;MD09G1080300;MD09G1081600;MD09G1082400;MD09G1080900;MD09G1081200;MD09G1080800;MD09G1081300;MD09G1080500;MD09G1081500;MD09G1080100;MD09G1080200;MD09G1081700;MD09G1082100;MD09G1082200;MD09G1080700;MD09G1080400;MD09G1080000;MD09G1082700;MD09G1081000;MD09G1080600;MD09G1082800
541	MSTRG.33212.7	MD04G1097600;MD04G1097800;MD04G1097900;MD04G1098000
542	MSTRG.49998.9	MD06G1096700;MD06G1097100;MD06G1098000;MD06G1097000
543	MSTRG.141314.18	MD17G1105500;MD17G1104500;MD17G1104600;MD17G1103400;MD17G1102800;MD17G1105100;MD17G1103000;MD17G1102900;MD17G1104900;MD17G1103800;MD17G1104800;MD17G1105300;MD17G1103300;MD17G1104000;MD17G1102600;MD17G1103100;MD17G1105400;MD17G1104700;MD17G1105200;MD17G1105000;MD17G1103700;MD17G1104400;MD17G1103900;MD17G1102700
544	MSTRG.53953.3	MD07G1008800;MD07G1010700;MD07G1009200;MD07G1010800;MD07G1010600;MD07G1009000;MD07G1010100;MD07G1010900;MD07G1010500;MD07G1011000;MD07G1010400;MD07G1008700;MD07G1009100;MD07G1009500;MD07G1009300;MD07G1008600;MD07G1008900;MD07G1010300;MD07G1010200;MD07G1009400
545	MSTRG.129156.1	MD15G1402300;MD15G1401900;MD15G1402200;MD15G1403300;MD15G1403200;MD15G1402400;MD15G1402100;MD15G1403600;MD15G1402800;MD15G1403500;MD15G1403400;MD15G1402000;MD15G1403000;MD15G1402600
546	MSTRG.25928.1	MD03G1151400;MD03G1151100;MD03G1151000;MD03G1151200;MD03G1150900
547	MSTRG.58723.7	MD07G1181900;MD07G1182500;MD07G1181700;MD07G1182000;MD07G1182600;MD07G1181300;MD07G1182200;MD07G1181400;MD07G1182100;MD07G1182300;MD07G1181200;MD07G1182400;MD07G1181600;MD07G1181800
548	MSTRG.913.16	MD00G1029300;MD00G1029200;MD00G1030400;MD00G1030000;MD00G1028900;MD00G1030300;MD00G1029400;MD00G1029500;MD00G1029000;MD00G1029100
549	MSTRG.75536.1	MD09G1238100;MD09G1238000;MD09G1237700;MD09G1237400;MD09G1237600;MD09G1237500;MD09G1237900
550	MSTRG.73745.1	MD09G1192200;MD09G1192700;MD09G1192900;MD09G1192800;MD09G1192600;MD09G1193100;MD09G1192500;MD09G1193200;MD09G1193000;MD09G1192300
551	MSTRG.60696.13	MD07G1264700;MD07G1263700;MD07G1263400;MD07G1262500;MD07G1264000;MD07G1262700;MD07G1263900;MD07G1264300;MD07G1263100;MD07G1263600;MD07G1264600;MD07G1263800;MD07G1264500;MD07G1263000;MD07G1262600;MD07G1262300;MD07G1263200;MD07G1262400;MD07G1262900;MD07G1263500;MD07G1262800;MD07G1264100
552	MSTRG.122011.2	MD15G1167100;MD15G1166700;MD15G1167000;MD15G1167300;MD15G1167200;MD15G1166800;MD15G1167500;MD15G1167400;MD15G1166900
553	MSTRG.106386.2	MD13G1158400;MD13G1158900;MD13G1159600;MD13G1158800;MD13G1159000;MD13G1159100;MD13G1159700;MD13G1159500;MD13G1158300;MD13G1158700;MD13G1159300;MD13G1158200;MD13G1159400;MD13G1159200
554	MSTRG.51711.4	MD06G1164500;MD06G1165300;MD06G1165400;MD06G1163700;MD06G1163900;MD06G1165500;MD06G1165900;MD06G1166200;MD06G1165200;MD06G1166300;MD06G1165700;MD06G1164200;MD06G1165100;MD06G1164900;MD06G1164000;MD06G1163600;MD06G1164700;MD06G1163500;MD06G1166100;MD06G1164300;MD06G1164600;MD06G1165800;MD06G1164800;MD06G1163800;MD06G1164100;MD06G1165600;MD06G1164400;MD06G1166000
555	MSTRG.33331.14	MD04G1101400;MD04G1101000;MD04G1101800;MD04G1100900;MD04G1101600;MD04G1101700;MD04G1101300;MD04G1101500
556	MSTRG.20508.1	MD02G1260200;MD02G1259300;MD02G1260000;MD02G1259900;MD02G1260300;MD02G1260100;MD02G1259800;MD02G1260400;MD02G1259200;MD02G1259400;MD02G1259000;MD02G1260600;MD02G1259100;MD02G1259600;MD02G1260500;MD02G1259700;MD02G1259500
557	MSTRG.56241.8	MD07G1109800;MD07G1109400;MD07G1109300;MD07G1108900;MD07G1109900;MD07G1109200;MD07G1108600;MD07G1109600;MD07G1108800;MD07G1109500;MD07G1108500;MD07G1110100;MD07G1109700;MD07G1108700;MD07G1110200
558	MSTRG.58161.2	MD07G1162900;MD07G1164000;MD07G1163700;MD07G1163200;MD07G1162100;MD07G1162800;MD07G1162300;MD07G1162000;MD07G1162500;MD07G1163400;MD07G1162400;MD07G1164300;MD07G1163500;MD07G1164400;MD07G1164100;MD07G1162200;MD07G1163800;MD07G1162700;MD07G1161900;MD07G1162600;MD07G1163100;MD07G1164200
559	MSTRG.27098.1	MD03G1188200;MD03G1188400;MD03G1187500;MD03G1187300;MD03G1188100;MD03G1187200;MD03G1187600;MD03G1187700;MD03G1187100;MD03G1188000;MD03G1187400
560	MSTRG.120243.1	MD15G1101700;MD15G1101500;MD15G1101900;MD15G1101800;MD15G1101400
561	MSTRG.136692.1	MD16G1235800;MD16G1235500;MD16G1235600;MD16G1235900;MD16G1235700
562	MSTRG.43227.1	MD05G1215100;MD05G1214900;MD05G1213400;MD05G1213800;MD05G1214300;MD05G1214600;MD05G1214700;MD05G1215400;MD05G1213300;MD05G1215200;MD05G1213900;MD05G1213700;MD05G1214000;MD05G1214400;MD05G1215500;MD05G1214500;MD05G1215300;MD05G1213600;MD05G1214800;MD05G1214200;MD05G1214100;MD05G1213500
563	MSTRG.134752.2	MD16G1173200;MD16G1172700;MD16G1173300;MD16G1172800;MD16G1172500;MD16G1172000;MD16G1171900;MD16G1173600;MD16G1172200;MD16G1173500;MD16G1172100;MD16G1172900;MD16G1172600;MD16G1173400;MD16G1172400;MD16G1173100
564	MSTRG.39321.1	MD05G1070500;MD05G1070600
565	MSTRG.141199.1	MD17G1099100;MD17G1098800;MD17G1099800;MD17G1099300;MD17G1100100;MD17G1100300;MD17G1099200;MD17G1100900;MD17G1100000;MD17G1099000;MD17G1099400;MD17G1100200;MD17G1098500;MD17G1100800;MD17G1100500;MD17G1100700;MD17G1098900;MD17G1099500;MD17G1100600;MD17G1098600;MD17G1099600;MD17G1101000;MD17G1099900;MD17G1098700
566	MSTRG.81317.1	MD10G1136200;MD10G1137300;MD10G1136700;MD10G1136600;MD10G1136400;MD10G1136100;MD10G1136300;MD10G1137000;MD10G1136800;MD10G1136500;MD10G1137200;MD10G1137100;MD10G1137400
567	MSTRG.48290.1	MD06G1049300;MD06G1048700;MD06G1049100;MD06G1048400;MD06G1048200;MD06G1049200;MD06G1048300;MD06G1048800;MD06G1048600;MD06G1048500
568	MSTRG.7855.1	MD01G1014200;MD01G1014300;MD01G1014400
569	MSTRG.70030.1	MD09G1047600;MD09G1047400;MD09G1048500;MD09G1046800;MD09G1047200;MD09G1048000;MD09G1046600;MD09G1049100;MD09G1048600;MD09G1048400;MD09G1047900;MD09G1047700;MD09G1048200;MD09G1049200;MD09G1047000;MD09G1048700;MD09G1046700;MD09G1047300;MD09G1048900;MD09G1048800;MD09G1049000;MD09G1047800;MD09G1048100;MD09G1046900;MD09G1047500;MD09G1047100;MD09G1048300
570	MSTRG.23493.1	MD03G1070000;MD03G1068600;MD03G1069600;MD03G1070100;MD03G1068700;MD03G1070200;MD03G1068500;MD03G1069000;MD03G1069100;MD03G1069900;MD03G1068400;MD03G1069800;MD03G1069200;MD03G1068300;MD03G1069400;MD03G1069500;MD03G1068800;MD03G1068900
571	MSTRG.128252.3	MD15G1375000;MD15G1376000;MD15G1375700;MD15G1376500;MD15G1376400;MD15G1376700;MD15G1376300;MD15G1376600;MD15G1375400;MD15G1375300;MD15G1375500;MD15G1375600;MD15G1375100;MD15G1376200;MD15G1375900;MD15G1375200;MD15G1376100
572	MSTRG.138093.3	MD16G1269100;MD16G1269000;MD16G1269200;MD16G1269800
573	MSTRG.16839.4	MD02G1134300;MD02G1134900;MD02G1133900;MD02G1135200;MD02G1134700;MD02G1134000;MD02G1135100;MD02G1134500;MD02G1135000;MD02G1134600;MD02G1134200;MD02G1134100;MD02G1134400
574	MSTRG.90091.1	MD11G1156300;MD11G1157200;MD11G1156600;MD11G1156400;MD11G1157500;MD11G1157000;MD11G1157100;MD11G1156700;MD11G1157400;MD11G1156500;MD11G1156800;MD11G1157300
575	MSTRG.4957.1	MD00G1142400;MD00G1142700;MD00G1143000;MD00G1142800;MD00G1142300;MD00G1142600;MD00G1142500;MD00G1142200
576	MSTRG.113041.2	MD14G1077700;MD14G1078200;MD14G1078100;MD14G1078400;MD14G1078600;MD14G1078700;MD14G1077900;MD14G1078500;MD14G1077800;MD14G1078300
577	MSTRG.86955.4	MD11G1015300;MD11G1015500;MD11G1015100;MD11G1014700;MD11G1015600;MD11G1015900;MD11G1015200;MD11G1014600;MD11G1015700;MD11G1014500;MD11G1014000;MD11G1015000;MD11G1014300;MD11G1015400;MD11G1014800;MD11G1014900;MD11G1016100;MD11G1014400;MD11G1016000;MD11G1014100;MD11G1015800;MD11G1014200
578	MSTRG.7425.3	MD01G1000900
579	MSTRG.65595.11	MD08G1143800;MD08G1142500;MD08G1142800;MD08G1142600;MD08G1143200;MD08G1143300;MD08G1143900;MD08G1143600;MD08G1143400;MD08G1143700;MD08G1143000;MD08G1142700;MD08G1143500
580	MSTRG.45745.2	MD05G1316600;MD05G1317400;MD05G1318200;MD05G1320200;MD05G1319400;MD05G1320300;MD05G1318600;MD05G1317700;MD05G1317100;MD05G1319900;MD05G1319600;MD05G1318800;MD05G1317200;MD05G1318900;MD05G1319300;MD05G1317500;MD05G1318700;MD05G1320400;MD05G1317300;MD05G1316700;MD05G1316900;MD05G1319800;MD05G1319200;MD05G1318000;MD05G1319500;MD05G1317800;MD05G1320100;MD05G1319700;MD05G1317000;MD05G1319100;MD05G1320…
581	MSTRG.139818.2	MD17G1045300;MD17G1044700;MD17G1044000;MD17G1043700;MD17G1042800;MD17G1043600;MD17G1044800;MD17G1042000;MD17G1044600;MD17G1043300;MD17G1044100;MD17G1042100;MD17G1042300;MD17G1043400;MD17G1042500;MD17G1042400;MD17G1044200;MD17G1044300;MD17G1044500;MD17G1042200;MD17G1045400;MD17G1043500;MD17G1042600;MD17G1044400
582	MSTRG.7603.11	MD01G1006300;MD01G1006000;MD01G1006200;MD01G1005900;MD01G1005800;MD01G1006100;MD01G1005700
583	MSTRG.24683.2	MD03G1116700;MD03G1116600;MD03G1117300;MD03G1117500;MD03G1117200;MD03G1117100;MD03G1117600;MD03G1117800;MD03G1117700;MD03G1116800;MD03G1117900;MD03G1116900
584	MSTRG.111078.4	MD14G1005100;MD14G1006500;MD14G1006600;MD14G1005800;MD14G1006700;MD14G1005600;MD14G1006000;MD14G1005400;MD14G1005500;MD14G1006300;MD14G1006400;MD14G1005700;MD14G1006100;MD14G1005200;MD14G1005300;MD14G1006200
585	MSTRG.7662.1	MD01G1007200;MD01G1007300;MD01G1007700
586	MSTRG.35457.15	MD04G1185900;MD04G1184600;MD04G1186300;MD04G1186100;MD04G1184900;MD04G1185600;MD04G1184800;MD04G1186000;MD04G1184300;MD04G1184500;MD04G1185700;MD04G1186200;MD04G1184700;MD04G1184100;MD04G1184000;MD04G1185100;MD04G1185800;MD04G1184400;MD04G1185000
587	MSTRG.34566.1	MD04G1150200;MD04G1151500;MD04G1150700;MD04G1150300;MD04G1150400;MD04G1150100;MD04G1150800;MD04G1151400;MD04G1150500;MD04G1150600;MD04G1151600;MD04G1151200;MD04G1151000;MD04G1151700;MD04G1151300;MD04G1151100
588	MSTRG.74192.7	MD09G1205400;MD09G1204500;MD09G1204600;MD09G1205500;MD09G1204700;MD09G1205200;MD09G1205300;MD09G1204400
589	MSTRG.7344.42	MD00G1220300;MD00G1219900;MD00G1215700;MD00G1215600;MD00G1220200;MD00G1220000;MD00G1215800;MD00G1215500
590	MSTRG.21755.2	MD02G1311600;MD02G1311300;MD02G1311400;MD02G1310500;MD02G1309500;MD02G1311100;MD02G1310400;MD02G1310000;MD02G1309600;MD02G1310900;MD02G1310800;MD02G1310600;MD02G1310300;MD02G1311700;MD02G1309800;MD02G1309900;MD02G1309700;MD02G1311200
591	MSTRG.63889.65	MD08G1081000;MD08G1082200;MD08G1082000;MD08G1082400;MD08G1081600;MD08G1083200;MD08G1083600;MD08G1082700;MD08G1082300;MD08G1082800;MD08G1081400;MD08G1081200;MD08G1082900;MD08G1083100;MD08G1083300;MD08G1082100;MD08G1083500;MD08G1081300
592	MSTRG.46305.6	MD05G1345400;MD05G1345500;MD05G1344900;MD05G1345100;MD05G1345900;MD05G1345700;MD05G1344400;MD05G1344800;MD05G1344500;MD05G1345000;MD05G1344000;MD05G1345200;MD05G1344300;MD05G1343600;MD05G1343900;MD05G1343500;MD05G1345600;MD05G1344200;MD05G1345800;MD05G1343700;MD05G1345300;MD05G1344700;MD05G1343800;MD05G1344100
593	MSTRG.24294.4	MD03G1101700;MD03G1101300;MD03G1101600;MD03G1099700;MD03G1101500;MD03G1100000;MD03G1100900;MD03G1101800;MD03G1099900;MD03G1101200;MD03G1100600;MD03G1100500;MD03G1100100;MD03G1100400;MD03G1099800;MD03G1100200;MD03G1100700;MD03G1101000
594	MSTRG.755.37	MD00G1024600;MD00G1023000;MD00G1022900;MD00G1024000;MD00G1023800;MD00G1024400;MD00G1024500;MD00G1022700;MD00G1023100;MD00G1022500;MD00G1024300;MD00G1024700;MD00G1024200;MD00G1022400;MD00G1022600;MD00G1023600;MD00G1024100;MD00G1023700
595	MSTRG.78824.10	MD10G1063600;MD10G1063400;MD10G1063500;MD10G1064500;MD10G1063800;MD10G1063700;MD10G1064200;MD10G1063900;MD10G1064400;MD10G1064100;MD10G1064300
596	MSTRG.14989.357	MD02G1053600;MD02G1056700;MD02G1053300;MD02G1056600;MD02G1057100;MD02G1052500;MD02G1056300;MD02G1056100;MD02G1054400;MD02G1053000;MD02G1054000;MD02G1053400;MD02G1052600;MD02G1053100;MD02G1054100;MD02G1056500;MD02G1054500;MD02G1052700;MD02G1056400;MD02G1052800;MD02G1054300;MD02G1056200;MD02G1053900;MD02G1056800;MD02G1053500;MD02G1053200;MD02G1054200
597	MSTRG.95812.1	MD12G1028800;MD12G1030500;MD12G1028400;MD12G1028500;MD12G1029700;MD12G1028600;MD12G1029300;MD12G1030600;MD12G1029200;MD12G1029100;MD12G1028700;MD12G1030400;MD12G1029600;MD12G1028900;MD12G1028200;MD12G1029500
598	MSTRG.26200.3	MD03G1160200;MD03G1160000;MD03G1159800;MD03G1159900;MD03G1159700;MD03G1160300;MD03G1160100;MD03G1159600
599	MSTRG.75535.1	MD09G1237700;MD09G1238000;MD09G1238100;MD09G1237600;MD09G1237500;MD09G1237900;MD09G1237400
600	MSTRG.113189.5	MD14G1082300;MD14G1082200
601	MSTRG.89313.2	MD11G1124700;MD11G1125600;MD11G1126000;MD11G1124600;MD11G1126400;MD11G1125900;MD11G1125500;MD11G1125800;MD11G1125700;MD11G1124900;MD11G1125100;MD11G1126500;MD11G1126100;MD11G1124500;MD11G1126200;MD11G1125000;MD11G1125200;MD11G1124800
602	MSTRG.19547.1	MD02G1223300;MD02G1223600;MD02G1223400;MD02G1223800;MD02G1223700;MD02G1223200;MD02G1223500;MD02G1223900
603	MSTRG.12223.2	MD01G1166200;MD01G1166000;MD01G1165800;MD01G1166300;MD01G1165900;MD01G1165400;MD01G1166100;MD01G1166500;MD01G1166400;MD01G1166600;MD01G1165600;MD01G1165300
604	MSTRG.106960.1	MD13G1176900;MD13G1177300;MD13G1175800;MD13G1176000;MD13G1176200;MD13G1176300;MD13G1176700;MD13G1176600;MD13G1176400;MD13G1175900;MD13G1176500;MD13G1177100;MD13G1177000;MD13G1176100;MD13G1177200
605	MSTRG.144165.24	MD17G1198300;MD17G1198900;MD17G1198800;MD17G1198700;MD17G1198500;MD17G1198400;MD17G1198100
606	MSTRG.76418.5	MD09G1269500;MD09G1269600;MD09G1269800;MD09G1270300;MD09G1270100;MD09G1271200;MD09G1270800;MD09G1270000;MD09G1270900;MD09G1270500;MD09G1270700;MD09G1271300;MD09G1270200;MD09G1271100;MD09G1270600;MD09G1269900;MD09G1269700;MD09G1271000
607	MSTRG.97666.1	MD12G1092800;MD12G1092300;MD12G1092600;MD12G1092500
608	MSTRG.54938.1	MD07G1059500;MD07G1059600;MD07G1059200;MD07G1059400;MD07G1059300;MD07G1058900;MD07G1059800;MD07G1058700;MD07G1060100;MD07G1060200;MD07G1059100;MD07G1058600;MD07G1058400;MD07G1058300;MD07G1060000;MD07G1059000;MD07G1058500;MD07G1060300;MD07G1059700;MD07G1059900
609	MSTRG.144385.6	MD17G1207300;MD17G1205700;MD17G1206100;MD17G1207100;MD17G1206300;MD17G1206900;MD17G1207700;MD17G1206800;MD17G1205600;MD17G1206200;MD17G1205800;MD17G1205200;MD17G1205300;MD17G1207200;MD17G1207500;MD17G1205900;MD17G1205400;MD17G1207400
610	MSTRG.65529.1	MD08G1140300;MD08G1140400;MD08G1140200;MD08G1140500;MD08G1140000;MD08G1140100
611	MSTRG.55001.1	MD07G1062300;MD07G1061400;MD07G1061600;MD07G1062100;MD07G1062600;MD07G1060900;MD07G1061100;MD07G1062400;MD07G1061000;MD07G1062500;MD07G1061300;MD07G1060800;MD07G1062200;MD07G1062700;MD07G1060700;MD07G1061200;MD07G1061500;MD07G1062000
612	MSTRG.34710.4	MD04G1158000;MD04G1159400;MD04G1158900;MD04G1158600;MD04G1159500;MD04G1158700;MD04G1159200;MD04G1159100;MD04G1159000;MD04G1159700;MD04G1159300;MD04G1158300;MD04G1158200;MD04G1158500
613	MSTRG.93188.4	MD11G1246200;MD11G1246700;MD11G1246800;MD11G1246600;MD11G1246900;MD11G1246400;MD11G1247300;MD11G1247600;MD11G1247500;MD11G1246500;MD11G1246300;MD11G1247400;MD11G1246100;MD11G1247000;MD11G1247100
614	MSTRG.143296.1	MD17G1174300;MD17G1174200;MD17G1174000
615	MSTRG.31571.1	MD04G1054100;MD04G1053300;MD04G1053200;MD04G1053800;MD04G1053500;MD04G1053400;MD04G1054000;MD04G1053700;MD04G1054200;MD04G1053600;MD04G1053900
616	MSTRG.145989.1	MD17G1260300;MD17G1259300;MD17G1259400;MD17G1259500;MD17G1260000;MD17G1260600;MD17G1259900;MD17G1260700;MD17G1260500;MD17G1260400;MD17G1259200;MD17G1259800;MD17G1260200;MD17G1260800;MD17G1260100;MD17G1259600
617	MSTRG.124087.2	MD15G1245600;MD15G1245500;MD15G1246000;MD15G1246200;MD15G1245900;MD15G1246100;MD15G1245800;MD15G1245700
618	MSTRG.7295.1	MD00G1214500;MD00G1214300;MD00G1214400;MD00G1214600
619	MSTRG.135671.1	MD16G1204700;MD16G1204900;MD16G1205300;MD16G1205200;MD16G1204600;MD16G1205100
620	MSTRG.128084.2	MD15G1370300;MD15G1370600;MD15G1369900;MD15G1370000;MD15G1370400;MD15G1370500;MD15G1369700;MD15G1369800;MD15G1370700;MD15G1370800
621	MSTRG.69490.4	MD09G1021300;MD09G1022800;MD09G1022100;MD09G1023000;MD09G1020700;MD09G1020800;MD09G1021200;MD09G1021600;MD09G1020200;MD09G1022400;MD09G1022900;MD09G1022000;MD09G1022600;MD09G1020500;MD09G1023300;MD09G1021500;MD09G1020600;MD09G1020900;MD09G1021100;MD09G1021700;MD09G1020000;MD09G1020300;MD09G1020100;MD09G1021800;MD09G1021000;MD09G1022300;MD09G1022700;MD09G1022200;MD09G1019900;MD09G1020400;MD09G1023…
622	MSTRG.20063.1	MD02G1243600;MD02G1242800;MD02G1242200;MD02G1242300;MD02G1242900;MD02G1243800;MD02G1243700;MD02G1242000;MD02G1243200;MD02G1243100;MD02G1242600;MD02G1242500;MD02G1243300;MD02G1242700;MD02G1242100;MD02G1243900;MD02G1242400
623	MSTRG.100120.1	MD12G1169500;MD12G1171000;MD12G1169900;MD12G1170800;MD12G1169400;MD12G1171600;MD12G1171400;MD12G1170000;MD12G1171900;MD12G1169100;MD12G1171700;MD12G1169000;MD12G1169200;MD12G1170900;MD12G1170200;MD12G1168900;MD12G1170100;MD12G1169700;MD12G1171300;MD12G1169600;MD12G1171200;MD12G1171800;MD12G1169800;MD12G1169300;MD12G1170400;MD12G1170600;MD12G1170300;MD12G1171100;MD12G1171500;MD12G1170700
624	MSTRG.94172.2	MD11G1281400;MD11G1281500;MD11G1280800;MD11G1280600;MD11G1280300;MD11G1280200;MD11G1281800;MD11G1281200;MD11G1281300;MD11G1280500;MD11G1280900;MD11G1281000;MD11G1280400;MD11G1281100;MD11G1281600;MD11G1280700;MD11G1281700
625	MSTRG.40274.1	MD05G1102000;MD05G1101800;MD05G1101600;MD05G1100800;MD05G1101500;MD05G1100700;MD05G1100900;MD05G1101000;MD05G1101900
626	MSTRG.104711.3	MD13G1095900;MD13G1094700;MD13G1094900;MD13G1096300;MD13G1094600;MD13G1096500;MD13G1096400;MD13G1094200;MD13G1095500;MD13G1095600;MD13G1095200;MD13G1094400;MD13G1096200;MD13G1094800;MD13G1095300;MD13G1095800;MD13G1094300;MD13G1095100;MD13G1096000;MD13G1095000;MD13G1094500
627	MSTRG.14427.1	MD02G1024100;MD02G1024700;MD02G1025400;MD02G1026200;MD02G1026300;MD02G1025200;MD02G1024500;MD02G1025500;MD02G1024800;MD02G1025600;MD02G1024300;MD02G1024600;MD02G1026100;MD02G1024400;MD02G1025100;MD02G1025900;MD02G1026000
628	MSTRG.50274.1	MD06G1106400;MD06G1106700;MD06G1107300;MD06G1106500;MD06G1107000;MD06G1106800;MD06G1107200;MD06G1107100;MD06G1106600;MD06G1106900;MD06G1106300
629	MSTRG.108611.1	MD13G1229500;MD13G1230700;MD13G1229700;MD13G1230500;MD13G1230000;MD13G1229900;MD13G1230600;MD13G1229800;MD13G1230200;MD13G1230800;MD13G1230100;MD13G1229400;MD13G1229600
630	MSTRG.66972.2	MD08G1184100;MD08G1184200;MD08G1183800;MD08G1184000;MD08G1183600;MD08G1183500;MD08G1183700;MD08G1183900
631	MSTRG.30164.1	MD04G1002000;MD04G1002600;MD04G1002900;MD04G1002400;MD04G1002500;MD04G1002200;MD04G1002700;MD04G1002800;MD04G1001900;MD04G1002100;MD04G1002300
632	MSTRG.56716.15	MD07G1122800;MD07G1123000;MD07G1122500;MD07G1122900;MD07G1122200;MD07G1122300;MD07G1122400
633	MSTRG.98130.1	MD12G1104300;MD12G1104200;MD12G1105100;MD12G1105000;MD12G1104700;MD12G1104800;MD12G1104900
634	MSTRG.14597.1	MD02G1032000;MD02G1031200;MD02G1032900;MD02G1033800;MD02G1031900;MD02G1033500;MD02G1033200;MD02G1031700;MD02G1031100;MD02G1031500;MD02G1031800;MD02G1033900;MD02G1032500;MD02G1031400;MD02G1033000;MD02G1032100;MD02G1032800;MD02G1033100;MD02G1034000;MD02G1031600;MD02G1033700;MD02G1032400;MD02G1032700;MD02G1032600;MD02G1033400
635	MSTRG.67644.2	MD08G1203100;MD08G1203900;MD08G1203400;MD08G1204000;MD08G1203600;MD08G1203000;MD08G1203300;MD08G1202900;MD08G1203800;MD08G1203200
636	MSTRG.35075.2	MD04G1170900;MD04G1171800;MD04G1171900;MD04G1172000;MD04G1171300;MD04G1171400;MD04G1171700;MD04G1170700;MD04G1171600;MD04G1171500;MD04G1170800
637	MSTRG.31014.1	MD04G1032700;MD04G1033100;MD04G1034200;MD04G1034400;MD04G1033300;MD04G1033900;MD04G1033200;MD04G1033500;MD04G1033000;MD04G1033400;MD04G1033600;MD04G1033800;MD04G1034700;MD04G1034100;MD04G1034000;MD04G1034600;MD04G1034500;MD04G1032600
638	MSTRG.59846.1	MD07G1226800;MD07G1224100;MD07G1225400;MD07G1225200;MD07G1225500;MD07G1226400;MD07G1224800;MD07G1225100;MD07G1223900;MD07G1224700;MD07G1224000;MD07G1224200;MD07G1223600;MD07G1223700;MD07G1223800;MD07G1224500;MD07G1226300;MD07G1226700;MD07G1224900;MD07G1226600;MD07G1225900;MD07G1225300;MD07G1224300;MD07G1224400;MD07G1226000;MD07G1225800;MD07G1226500;MD07G1226100
639	MSTRG.20509.12	MD02G1260000;MD02G1259900;MD02G1260200;MD02G1259300;MD02G1260700;MD02G1260100;MD02G1260300;MD02G1259000;MD02G1259400;MD02G1260400;MD02G1259200;MD02G1260800;MD02G1259500;MD02G1259100;MD02G1259600;MD02G1260500;MD02G1259700;MD02G1260600
640	MSTRG.82528.2	MD10G1180300;MD10G1180000;MD10G1180600;MD10G1178300;MD10G1178800;MD10G1179900;MD10G1178100;MD10G1178700;MD10G1180400;MD10G1179400;MD10G1180900;MD10G1178900;MD10G1180200;MD10G1178200;MD10G1179100;MD10G1179700;MD10G1180800;MD10G1181000;MD10G1179300;MD10G1179200;MD10G1180100;MD10G1180500;MD10G1179600;MD10G1179000;MD10G1178600;MD10G1180700
641	MSTRG.102049.8	MD12G1247900;MD12G1247500;MD12G1249000;MD12G1246700;MD12G1248200;MD12G1246900;MD12G1247000;MD12G1246600;MD12G1247100;MD12G1248900;MD12G1246800;MD12G1248100;MD12G1248300;MD12G1248000;MD12G1249100;MD12G1246500;MD12G1247400;MD12G1248600;MD12G1248500;MD12G1248800;MD12G1247300;MD12G1247200;MD12G1247800
642	MSTRG.40447.5	MD05G1106800;MD05G1106600;MD05G1106900;MD05G1107000;MD05G1106000;MD05G1107500;MD05G1106400;MD05G1107700;MD05G1107300;MD05G1106700;MD05G1106100;MD05G1106300;MD05G1106200;MD05G1107600
643	MSTRG.45272.1	MD05G1298700;MD05G1298400;MD05G1298000;MD05G1296400;MD05G1297000;MD05G1297700;MD05G1298100;MD05G1297500;MD05G1296000;MD05G1298300;MD05G1297900;MD05G1297300;MD05G1296600;MD05G1298800;MD05G1298200;MD05G1298500;MD05G1297400;MD05G1297100;MD05G1296500;MD05G1296900;MD05G1298900;MD05G1296800;MD05G1298600;MD05G1297800;MD05G1296700
644	MSTRG.65385.1	MD08G1136300;MD08G1136400;MD08G1137000;MD08G1136100;MD08G1135900;MD08G1136900;MD08G1135700;MD08G1136700;MD08G1135800;MD08G1136800;MD08G1136600;MD08G1136000;MD08G1136500
645	MSTRG.132865.2	MD16G1106500;MD16G1105800;MD16G1106000;MD16G1106600;MD16G1105600;MD16G1106100;MD16G1104300;MD16G1106200;MD16G1104700;MD16G1105000;MD16G1105700;MD16G1104500;MD16G1106300;MD16G1104800;MD16G1106400;MD16G1104600;MD16G1104200;MD16G1104900;MD16G1105900;MD16G1104400;MD16G1105400
646	MSTRG.47629.1	MD06G1029400;MD06G1029300;MD06G1030300;MD06G1030500;MD06G1029200;MD06G1030400;MD06G1029100
647	MSTRG.76209.1	MD09G1261900;MD09G1262000;MD09G1262700;MD09G1262200;MD09G1262300;MD09G1262400;MD09G1262800;MD09G1261500;MD09G1263000;MD09G1262900;MD09G1261400;MD09G1261600;MD09G1262100;MD09G1262600;MD09G1261800;MD09G1261700
648	MSTRG.134237.1	MD16G1156900;MD16G1156100;MD16G1156800;MD16G1155800;MD16G1156400;MD16G1156500;MD16G1155900;MD16G1156300;MD16G1156700;MD16G1156600;MD16G1155700
649	MSTRG.78558.2	MD10G1057100;MD10G1056700;MD10G1057000;MD10G1056800;MD10G1056400;MD10G1055700;MD10G1056600;MD10G1056500;MD10G1056900;MD10G1056000;MD10G1055800;MD10G1055900;MD10G1056200;MD10G1056300;MD10G1056100
650	MSTRG.120880.1	MD15G1124400;MD15G1126200;MD15G1126700;MD15G1125000;MD15G1126900;MD15G1124600;MD15G1126500;MD15G1125100;MD15G1124500;MD15G1126300;MD15G1124900;MD15G1125300;MD15G1124700;MD15G1124300;MD15G1125800;MD15G1124800;MD15G1126800;MD15G1125500;MD15G1126400;MD15G1126000;MD15G1125900;MD15G1126600;MD15G1125200;MD15G1125400;MD15G1126100
651	MSTRG.12896.8	MD01G1199100;MD01G1198900;MD01G1198400;MD01G1197700;MD01G1201100;MD01G1200800;MD01G1197400;MD01G1198200;MD01G1198700;MD01G1199000;MD01G1198100;MD01G1200500;MD01G1199900;MD01G1201000;MD01G1197500;MD01G1200900;MD01G1199500;MD01G1198500;MD01G1200000;MD01G1198000;MD01G1200300;MD01G1199800;MD01G1200100;MD01G1199400;MD01G1199200;MD01G1198600;MD01G1200700;MD01G1199600;MD01G1197600;MD01G1200400;MD01G1197…
652	MSTRG.141962.2	MD17G1129500;MD17G1128900;MD17G1128600;MD17G1129000;MD17G1129100;MD17G1130000;MD17G1129800;MD17G1129700;MD17G1128400;MD17G1128300;MD17G1129400;MD17G1129900;MD17G1129300;MD17G1128800;MD17G1128700;MD17G1128200
653	MSTRG.7368.2	MD00G1220000;MD00G1220700;MD00G1220500;MD00G1220300;MD00G1220600;MD00G1220200;MD00G1220400
654	MSTRG.22432.2	MD03G1016700;MD03G1019300;MD03G1017300;MD03G1019700;MD03G1019500;MD03G1018300;MD03G1018000;MD03G1019400;MD03G1019200;MD03G1018600;MD03G1018400;MD03G1018100;MD03G1018700;MD03G1016900;MD03G1018500;MD03G1017600;MD03G1019600;MD03G1018900;MD03G1017000;MD03G1017100;MD03G1018200;MD03G1017800;MD03G1017500;MD03G1017700;MD03G1018800;MD03G1016800;MD03G1019000;MD03G1019100;MD03G1017400
655	MSTRG.130037.1	MD15G1439200;MD15G1439600;MD15G1438400;MD15G1438300;MD15G1438100;MD15G1439800;MD15G1438800;MD15G1439400;MD15G1438500;MD15G1439100;MD15G1439000;MD15G1438700;MD15G1439500;MD15G1439700;MD15G1439300;MD15G1438900;MD15G1439900;MD15G1438200
656	MSTRG.98296.1	MD12G1109000;MD12G1108700;MD12G1109200;MD12G1109100;MD12G1109400
657	MSTRG.22885.5	MD03G1042000;MD03G1040500;MD03G1042200;MD03G1041800;MD03G1041600;MD03G1040600;MD03G1041400;MD03G1042300;MD03G1040100;MD03G1040700;MD03G1041200;MD03G1040000;MD03G1041000;MD03G1041900;MD03G1042100;MD03G1041300;MD03G1042700;MD03G1040200;MD03G1039900;MD03G1041500;MD03G1042500;MD03G1040300;MD03G1039800;MD03G1041100;MD03G1042800;MD03G1040400;MD03G1042400
658	MSTRG.64559.12	MD08G1108300;MD08G1109100;MD08G1108600;MD08G1108700;MD08G1108800;MD08G1109500;MD08G1107700;MD08G1108100;MD08G1108000;MD08G1107900;MD08G1108500;MD08G1107600;MD08G1109000;MD08G1108900;MD08G1107800;MD08G1109200;MD08G1109300;MD08G1108400
659	MSTRG.97601.5	MD12G1091400;MD12G1091600;MD12G1091800;MD12G1091100;MD12G1092000
660	MSTRG.8947.1	MD01G1041000;MD01G1041200;MD01G1040900;MD01G1040800;MD01G1041400;MD01G1041100;MD01G1041500;MD01G1041300
661	MSTRG.38052.1	MD05G1033200;MD05G1033700;MD05G1033800;MD05G1033000;MD05G1033100;MD05G1033400;MD05G1034100;MD05G1034300;MD05G1032900;MD05G1034000;MD05G1032700;MD05G1033300;MD05G1034200;MD05G1032800;MD05G1033900
662	MSTRG.107631.1	MD13G1198600;MD13G1198900;MD13G1199100;MD13G1198500;MD13G1199000;MD13G1198700;MD13G1198200;MD13G1198400;MD13G1198800;MD13G1198300
663	MSTRG.31955.5	MD04G1064200;MD04G1064000;MD04G1064100
664	MSTRG.28908.6	MD03G1249600;MD03G1249100;MD03G1249000;MD03G1249500;MD03G1248900;MD03G1249200;MD03G1248700;MD03G1249700;MD03G1250000;MD03G1248800
665	MSTRG.87554.1	MD11G1043500;MD11G1042600;MD11G1043400;MD11G1042900;MD11G1043200;MD11G1042500;MD11G1042300;MD11G1042800;MD11G1042100;MD11G1042700;MD11G1043100;MD11G1043000;MD11G1043300;MD11G1043600;MD11G1042200;MD11G1042400
666	MSTRG.26107.7	MD03G1156800;MD03G1156600;MD03G1156300;MD03G1156400;MD03G1156200;MD03G1156500;MD03G1156900
667	MSTRG.104381.17	MD13G1083200;MD13G1082200;MD13G1084300;MD13G1082800;MD13G1083600;MD13G1082500;MD13G1081600;MD13G1081900;MD13G1084100;MD13G1081300;MD13G1081700;MD13G1082600;MD13G1084200;MD13G1081200;MD13G1081500;MD13G1083700;MD13G1082000;MD13G1082100;MD13G1081400;MD13G1083000;MD13G1083500;MD13G1082900;MD13G1081800;MD13G1082300;MD13G1082400;MD13G1083400;MD13G1084400;MD13G1082700
668	MSTRG.120434.1	MD15G1109000;MD15G1108900;MD15G1109700;MD15G1109300;MD15G1111100;MD15G1110800;MD15G1109100;MD15G1110500;MD15G1110200;MD15G1109200;MD15G1109800;MD15G1109400;MD15G1111300;MD15G1110100;MD15G1109900;MD15G1110400;MD15G1110600;MD15G1110000;MD15G1110300;MD15G1109600;MD15G1111000;MD15G1109500;MD15G1108800;MD15G1108700;MD15G1110900
669	MSTRG.129479.1	MD15G1415600;MD15G1415200;MD15G1415700;MD15G1416100;MD15G1416200;MD15G1415800;MD15G1415400;MD15G1415300;MD15G1415900;MD15G1416000;MD15G1415500
670	MSTRG.20411.2	MD02G1257800;MD02G1257400;MD02G1257300;MD02G1257200;MD02G1257000;MD02G1256600;MD02G1257100;MD02G1256900;MD02G1257600;MD02G1256400;MD02G1257700;MD02G1256500;MD02G1257900
671	MSTRG.36370.2	MD04G1223800;MD04G1223600;MD04G1223300;MD04G1223900;MD04G1224800;MD04G1224500;MD04G1222900;MD04G1224100;MD04G1224900;MD04G1223400;MD04G1222600;MD04G1225000;MD04G1224700;MD04G1223000;MD04G1225300;MD04G1224600;MD04G1222800;MD04G1225200;MD04G1225400;MD04G1224400;MD04G1224300;MD04G1224200;MD04G1223500;MD04G1223200;MD04G1224000;MD04G1225100
672	MSTRG.10690.2	MD01G1104300;MD01G1104800;MD01G1104200;MD01G1103800;MD01G1105000;MD01G1104600;MD01G1104700;MD01G1105100;MD01G1104900
673	MSTRG.110129.1	MD13G1269900;MD13G1269700
674	MSTRG.128862.3	MD15G1391700;MD15G1391600;MD15G1391900
675	MSTRG.93682.1	MD11G1262900;MD11G1261600;MD11G1261500;MD11G1262600;MD11G1262700;MD11G1261800;MD11G1262100;MD11G1263200;MD11G1262000;MD11G1262300;MD11G1262400;MD11G1261900
676	MSTRG.82199.2	MD10G1167800;MD10G1168200;MD10G1167700;MD10G1167900;MD10G1168000
677	MSTRG.110423.8	MD13G1276400;MD13G1277200;MD13G1277100;MD13G1276600;MD13G1276300;MD13G1277300;MD13G1276500
678	MSTRG.56966.2	MD07G1128900;MD07G1129100;MD07G1128800;MD07G1130200;MD07G1129300;MD07G1129400;MD07G1129600;MD07G1129000;MD07G1129800;MD07G1129700;MD07G1130000
679	MSTRG.4020.3	MD00G1117200;MD00G1117400;MD00G1117300;MD00G1117500;MD00G1117100
680	MSTRG.64585.5	MD08G1110200;MD08G1108100;MD08G1109500;MD08G1110300;MD08G1108800;MD08G1109700;MD08G1108700;MD08G1110100;MD08G1108600;MD08G1109600;MD08G1108300;MD08G1109100;MD08G1109800;MD08G1108400;MD08G1110600;MD08G1109200;MD08G1110400;MD08G1110000;MD08G1109900;MD08G1108900;MD08G1109000;MD08G1108500;MD08G1110500
681	MSTRG.60184.1	MD07G1241000;MD07G1240200;MD07G1241300;MD07G1242000;MD07G1241700;MD07G1240700;MD07G1240900;MD07G1241900;MD07G1241100;MD07G1239900;MD07G1240300;MD07G1239800;MD07G1240000;MD07G1240500;MD07G1242100;MD07G1239600;MD07G1241200;MD07G1240100;MD07G1241400;MD07G1240600;MD07G1241500;MD07G1241600;MD07G1239700;MD07G1241800;MD07G1240400;MD07G1239500
682	MSTRG.33195.7	MD04G1097100;MD04G1097200;MD04G1097300;MD04G1097400;MD04G1097600
683	MSTRG.132564.1	MD16G1095000;MD16G1094700;MD16G1094200;MD16G1094000;MD16G1094300;MD16G1093100;MD16G1093200;MD16G1092400;MD16G1094600;MD16G1092700;MD16G1092800;MD16G1094900;MD16G1092600;MD16G1093300;MD16G1094800;MD16G1093700;MD16G1094500;MD16G1093900;MD16G1093600;MD16G1092900;MD16G1093500;MD16G1094100;MD16G1094400;MD16G1092500;MD16G1093400;MD16G1093800;MD16G1093000
684	MSTRG.98135.3	MD12G1105000;MD12G1104800;MD12G1104700;MD12G1104200;MD12G1104300;MD12G1105200;MD12G1104900;MD12G1104600;MD12G1105100
685	MSTRG.6500.1	MD00G1184500
686	MSTRG.24045.2	MD03G1091900;MD03G1090900;MD03G1091200;MD03G1091800;MD03G1091400;MD03G1091600;MD03G1091100;MD03G1092000;MD03G1091300;MD03G1091500;MD03G1091700
687	MSTRG.4263.4	MD00G1124200;MD00G1124100;MD00G1123900;MD00G1124400;MD00G1123600;MD00G1124000;MD00G1123700
688	MSTRG.25956.21	MD03G1152300;MD03G1152400;MD03G1152100;MD03G1153600;MD03G1153100;MD03G1152600;MD03G1153200;MD03G1153500;MD03G1152800;MD03G1152900
689	MSTRG.127000.1	MD15G1339400;MD15G1339600;MD15G1340200;MD15G1340000;MD15G1339500
690	MSTRG.6732.14	MD00G1190200;MD00G1189900;MD00G1190000;MD00G1190500
691	MSTRG.73339.1	MD09G1180000;MD09G1180900;MD09G1181000;MD09G1180100;MD09G1181100;MD09G1180800;MD09G1181300;MD09G1179800;MD09G1180500;MD09G1181400;MD09G1179900;MD09G1181200;MD09G1179700;MD09G1180300;MD09G1180400
692	MSTRG.124495.4	MD15G1259000;MD15G1259100;MD15G1259200;MD15G1260000;MD15G1259900;MD15G1259500;MD15G1259700;MD15G1259300
693	MSTRG.77258.1	MD10G1006600;MD10G1006700;MD10G1006900;MD10G1006300;MD10G1006100;MD10G1006500;MD10G1006800;MD10G1007000;MD10G1007200;MD10G1007100;MD10G1006000;MD10G1006400
694	MSTRG.42029.1	MD05G1169600;MD05G1168100;MD05G1168300;MD05G1170100;MD05G1169300;MD05G1169200;MD05G1169100;MD05G1167700;MD05G1167900;MD05G1169900;MD05G1169500;MD05G1168000;MD05G1169400;MD05G1168400;MD05G1168200;MD05G1169800;MD05G1167800;MD05G1169700;MD05G1168800;MD05G1168600;MD05G1168500;MD05G1170000;MD05G1168700
695	MSTRG.49009.1	MD06G1069600;MD06G1069500;MD06G1069400;MD06G1069700;MD06G1069300
696	MSTRG.86593.1	MD10G1341700;MD10G1341600;MD10G1342100;MD10G1342600;MD10G1342000;MD10G1342300;MD10G1341400;MD10G1341800;MD10G1342500;MD10G1341300;MD10G1341900;MD10G1342400;MD10G1341500;MD10G1342200
697	MSTRG.33814.24	MD04G1123200;MD04G1123900;MD04G1123600;MD04G1123500;MD04G1124100;MD04G1123100;MD04G1123800;MD04G1123400;MD04G1123300
698	MSTRG.85406.1	MD10G1291100;MD10G1292200;MD10G1291300;MD10G1292400;MD10G1293000;MD10G1292500;MD10G1292900;MD10G1291400;MD10G1291800;MD10G1292600;MD10G1291500;MD10G1290900;MD10G1291600;MD10G1291000;MD10G1292800;MD10G1290700;MD10G1291700;MD10G1291200;MD10G1292100;MD10G1292300;MD10G1292700
699	MSTRG.127560.9	MD15G1354400;MD15G1354500;MD15G1354200;MD15G1354700;MD15G1354300
700	MSTRG.23991.1	MD03G1089400;MD03G1090400;MD03G1090000;MD03G1090500;MD03G1090600;MD03G1088500;MD03G1088100;MD03G1089000;MD03G1089700;MD03G1089100;MD03G1089900;MD03G1090200;MD03G1088700;MD03G1089800;MD03G1088900;MD03G1088300;MD03G1089600;MD03G1089300;MD03G1088400;MD03G1088600;MD03G1089200;MD03G1088800;MD03G1088200;MD03G1090100
701	MSTRG.129242.2	MD15G1406000;MD15G1404800;MD15G1404500;MD15G1405000;MD15G1404700;MD15G1405500;MD15G1404900;MD15G1404300;MD15G1404100;MD15G1406700;MD15G1405100;MD15G1405900;MD15G1405700;MD15G1405300;MD15G1405200;MD15G1406600;MD15G1404200;MD15G1405800;MD15G1404600;MD15G1406500;MD15G1405400;MD15G1404400
702	MSTRG.88812.1	MD11G1104800;MD11G1104900;MD11G1105100;MD11G1105000;MD11G1105200;MD11G1105300;MD11G1104700
703	MSTRG.133255.1	MD16G1118800;MD16G1120400;MD16G1119300;MD16G1119400;MD16G1120800;MD16G1119900;MD16G1120300;MD16G1119800;MD16G1118900;MD16G1119000;MD16G1119500;MD16G1119100;MD16G1119200;MD16G1119600;MD16G1120200;MD16G1120000;MD16G1120100;MD16G1120500
704	MSTRG.54877.72	MD07G1055700;MD07G1055900;MD07G1057100;MD07G1055200;MD07G1055600;MD07G1055100;MD07G1055400;MD07G1056000;MD07G1056900;MD07G1056600;MD07G1055500;MD07G1054800;MD07G1055800;MD07G1054900;MD07G1056800;MD07G1057000;MD07G1055000;MD07G1055300
705	MSTRG.66733.1	MD08G1177900;MD08G1177800;MD08G1177300
706	MSTRG.29923.1	MD03G1294700;MD03G1294500;MD03G1295100;MD03G1296200;MD03G1294800;MD03G1296100;MD03G1293800;MD03G1293900;MD03G1295700;MD03G1293100;MD03G1294200;MD03G1294400;MD03G1294300;MD03G1293300;MD03G1293200;MD03G1293700;MD03G1295200;MD03G1294100;MD03G1293600;MD03G1295600;MD03G1295800;MD03G1294600;MD03G1295400;MD03G1293400;MD03G1295300;MD03G1296000;MD03G1295900
707	MSTRG.129420.1	MD15G1414200;MD15G1412700;MD15G1413600;MD15G1413700;MD15G1413400;MD15G1413200;MD15G1412600;MD15G1412800;MD15G1413100;MD15G1413300;MD15G1413000;MD15G1412900;MD15G1414100;MD15G1414000;MD15G1413500
708	MSTRG.123784.1	MD15G1234500;MD15G1234400;MD15G1233700;MD15G1233400;MD15G1233600;MD15G1234000;MD15G1234600;MD15G1233500
709	MSTRG.58721.3	MD07G1181400;MD07G1181100;MD07G1181600;MD07G1181800;MD07G1181900;MD07G1181500;MD07G1182000;MD07G1181700
710	MSTRG.64559.9	MD08G1108300;MD08G1109100;MD08G1108600;MD08G1108700;MD08G1108800;MD08G1108100;MD08G1108000;MD08G1107700;MD08G1107500;MD08G1107900;MD08G1107600;MD08G1108500;MD08G1108900;MD08G1109000;MD08G1107800;MD08G1109300;MD08G1108400;MD08G1109200
711	MSTRG.88440.54	MD11G1088300;MD11G1088000;MD11G1090500;MD11G1090300;MD11G1090600;MD11G1089700;MD11G1088500;MD11G1090400;MD11G1089400;MD11G1089100;MD11G1087600;MD11G1090200;MD11G1088400;MD11G1089300;MD11G1087700;MD11G1088600;MD11G1088700;MD11G1087800;MD11G1089600;MD11G1088800
712	MSTRG.24438.1	MD03G1107700;MD03G1106600;MD03G1107500;MD03G1106700;MD03G1107600;MD03G1107200;MD03G1106900;MD03G1107100;MD03G1107300;MD03G1108000;MD03G1107400;MD03G1108100;MD03G1107800;MD03G1106800;MD03G1107900
713	MSTRG.69554.1	MD09G1024900;MD09G1024600;MD09G1025700;MD09G1025400;MD09G1023800;MD09G1025200;MD09G1023400;MD09G1025600;MD09G1024200;MD09G1024500;MD09G1025000;MD09G1024000;MD09G1025300;MD09G1024300;MD09G1023300;MD09G1023600;MD09G1025500;MD09G1024400;MD09G1024800;MD09G1023500;MD09G1024100;MD09G1025100
714	MSTRG.91936.2	MD11G1204800;MD11G1205900;MD11G1205200;MD11G1205400;MD11G1204400;MD11G1205300;MD11G1205000;MD11G1205100;MD11G1204700;MD11G1205500;MD11G1205700;MD11G1204600;MD11G1204900;MD11G1205600;MD11G1205800
715	MSTRG.144165.31	MD17G1198300;MD17G1198900;MD17G1198800;MD17G1198700;MD17G1198500;MD17G1198400;MD17G1198100
716	MSTRG.30924.4	MD04G1029600;MD04G1028300;MD04G1028000;MD04G1029400;MD04G1027900;MD04G1028900;MD04G1029900;MD04G1028700;MD04G1028800;MD04G1027800;MD04G1028200;MD04G1029100;MD04G1029200;MD04G1028600;MD04G1028100;MD04G1028500;MD04G1030000;MD04G1029700;MD04G1029000;MD04G1028400
717	MSTRG.19902.20	MD02G1236600;MD02G1236800;MD02G1236900;MD02G1237300;MD02G1237200;MD02G1236700;MD02G1236500;MD02G1237400
718	MSTRG.103783.2	MD13G1057300;MD13G1058100;MD13G1058900;MD13G1059000;MD13G1056400;MD13G1058200;MD13G1056200;MD13G1056900;MD13G1056700;MD13G1058500;MD13G1057100;MD13G1058300;MD13G1056800;MD13G1058700;MD13G1057800;MD13G1057000;MD13G1057500;MD13G1058600;MD13G1057400;MD13G1057700;MD13G1058400;MD13G1058800;MD13G1057200;MD13G1056500;MD13G1056600;MD13G1058000;MD13G1056300
719	MSTRG.138838.1	MD16G1287500;MD16G1287000;MD16G1286700;MD16G1287300;MD16G1286600;MD16G1286900;MD16G1286500;MD16G1286800;MD16G1287100;MD16G1287400;MD16G1287200
720	MSTRG.54826.1	MD07G1054300;MD07G1053200;MD07G1054500;MD07G1054100;MD07G1053300;MD07G1054600;MD07G1054800;MD07G1053700;MD07G1054400;MD07G1053000;MD07G1053600;MD07G1053100;MD07G1054700;MD07G1054000;MD07G1053500
721	MSTRG.6395.1	MD00G1181500;MD00G1181400;MD00G1181600;MD00G1181300
722	MSTRG.49780.3	MD06G1090200;MD06G1089800;MD06G1091100;MD06G1090800;MD06G1091200;MD06G1091000;MD06G1090900;MD06G1090500;MD06G1090400;MD06G1090000;MD06G1089700;MD06G1090600;MD06G1090100;MD06G1090700
723	MSTRG.141117.2	MD17G1095600;MD17G1096100;MD17G1096800;MD17G1096700;MD17G1096200;MD17G1095500;MD17G1097200;MD17G1097300;MD17G1096500;MD17G1096400;MD17G1096000;MD17G1096900;MD17G1096300;MD17G1095300;MD17G1097400;MD17G1096600;MD17G1097500;MD17G1095900;MD17G1095400;MD17G1097000;MD17G1095700;MD17G1095800;MD17G1095100;MD17G1095200;MD17G1097100
724	MSTRG.82843.3	MD10G1190300;MD10G1189900;MD10G1190100;MD10G1191200;MD10G1189600;MD10G1190200;MD10G1190800;MD10G1189700;MD10G1190700;MD10G1190900;MD10G1189800;MD10G1190500;MD10G1191300;MD10G1190400;MD10G1190000;MD10G1191100
725	MSTRG.139603.2	MD17G1034700;MD17G1033700;MD17G1034800;MD17G1033100;MD17G1034200;MD17G1034300;MD17G1035600;MD17G1035000;MD17G1034000;MD17G1035700;MD17G1033600;MD17G1033400;MD17G1033000;MD17G1035500;MD17G1033800;MD17G1034900;MD17G1034400;MD17G1035300;MD17G1032700;MD17G1033200;MD17G1032900;MD17G1034100;MD17G1035200;MD17G1034600;MD17G1032600;MD17G1035100;MD17G1035400
726	MSTRG.90078.1	MD11G1156800;MD11G1156500;MD11G1156700;MD11G1157100;MD11G1157000;MD11G1156600;MD11G1157200;MD11G1156200;MD11G1156400;MD11G1156300
727	MSTRG.36619.2	MD04G1232500;MD04G1231800;MD04G1232900;MD04G1234100;MD04G1233500;MD04G1233100;MD04G1232300;MD04G1231700;MD04G1231900;MD04G1233200;MD04G1234200;MD04G1232100;MD04G1232600;MD04G1232400;MD04G1233800;MD04G1233400;MD04G1233900;MD04G1234000;MD04G1232700;MD04G1233000;MD04G1232000;MD04G1232200;MD04G1233600
728	MSTRG.81007.1	MD10G1126200;MD10G1126400;MD10G1125100;MD10G1125900;MD10G1125800;MD10G1126000;MD10G1124800;MD10G1126100;MD10G1125200;MD10G1125700;MD10G1124900;MD10G1125000;MD10G1126300;MD10G1125400
729	MSTRG.88104.2	MD11G1068900;MD11G1067800;MD11G1067900;MD11G1068400;MD11G1067500;MD11G1068600;MD11G1068200;MD11G1067600;MD11G1068500;MD11G1069300;MD11G1069000;MD11G1067700;MD11G1068000;MD11G1068700;MD11G1069100;MD11G1069200;MD11G1068800
730	MSTRG.106042.2	MD13G1144200;MD13G1144600;MD13G1144500;MD13G1143400;MD13G1145100;MD13G1143000;MD13G1144700;MD13G1144000;MD13G1144300;MD13G1143700;MD13G1145500;MD13G1145000;MD13G1143600;MD13G1144800;MD13G1143200;MD13G1145200;MD13G1144100;MD13G1144900;MD13G1143500;MD13G1143900;MD13G1145600;MD13G1143800
731	MSTRG.69317.6	MD09G1014000;MD09G1014300;MD09G1016200;MD09G1016000;MD09G1015300;MD09G1014100;MD09G1015700;MD09G1015400;MD09G1013300;MD09G1013000;MD09G1013500;MD09G1013400;MD09G1015500;MD09G1015200;MD09G1014800;MD09G1013100;MD09G1015900;MD09G1013800;MD09G1015100;MD09G1014700;MD09G1016100;MD09G1015800;MD09G1014900;MD09G1015000;MD09G1013900;MD09G1013600;MD09G1016300;MD09G1013700;MD09G1014400;MD09G1015600;MD09G1013…
732	MSTRG.33814.32	MD04G1124100;MD04G1123300;MD04G1123800;MD04G1123400;MD04G1123100;MD04G1123600;MD04G1123500;MD04G1123900;MD04G1123200
733	MSTRG.53303.1	MD06G1224900;MD06G1226300;MD06G1226000;MD06G1225100;MD06G1225900;MD06G1225200;MD06G1226800;MD06G1225300;MD06G1225500;MD06G1225800;MD06G1226200;MD06G1225600;MD06G1226900;MD06G1227000;MD06G1226100;MD06G1226600;MD06G1225400;MD06G1226700;MD06G1226500;MD06G1225000
734	MSTRG.49850.3	MD06G1092400;MD06G1091600;MD06G1092500;MD06G1092300;MD06G1091700;MD06G1092000;MD06G1091800;MD06G1091900;MD06G1092100;MD06G1092800;MD06G1092700;MD06G1092200
735	MSTRG.99574.2	MD12G1148000;MD12G1148300;MD12G1148500;MD12G1148700;MD12G1148100;MD12G1148200;MD12G1148400;MD12G1148600;MD12G1147700;MD12G1147900
736	MSTRG.46654.1	MD05G1359900;MD05G1359700;MD05G1358700;MD05G1360000;MD05G1359500;MD05G1359300;MD05G1360100;MD05G1359200;MD05G1358500;MD05G1360200;MD05G1360300;MD05G1359100;MD05G1359600;MD05G1358900;MD05G1358600;MD05G1359000;MD05G1359400;MD05G1358800
737	MSTRG.146205.1	MD17G1267200;MD17G1267900;MD17G1267800;MD17G1268900;MD17G1268600;MD17G1269100;MD17G1267300;MD17G1268300;MD17G1269200;MD17G1268200;MD17G1268100;MD17G1269300;MD17G1267700;MD17G1268500;MD17G1267600;MD17G1267500;MD17G1267400;MD17G1269000;MD17G1268000;MD17G1268400
738	MSTRG.19491.2	MD02G1221600;MD02G1222600;MD02G1222900;MD02G1221500;MD02G1222700;MD02G1223100;MD02G1222100;MD02G1222800;MD02G1223000;MD02G1222400;MD02G1222500;MD02G1222000;MD02G1221900
739	MSTRG.122976.1	MD15G1205600;MD15G1207100;MD15G1205700;MD15G1206200;MD15G1206600;MD15G1206300;MD15G1206700;MD15G1205400;MD15G1205900;MD15G1205500;MD15G1205200;MD15G1206900;MD15G1207000;MD15G1205800;MD15G1206500;MD15G1205300;MD15G1206000;MD15G1205100;MD15G1206800;MD15G1206400;MD15G1204900;MD15G1204800
740	MSTRG.65064.9	MD08G1125500;MD08G1125400;MD08G1125700;MD08G1126400;MD08G1126200;MD08G1125800;MD08G1126100;MD08G1125100;MD08G1126700;MD08G1126000;MD08G1126500;MD08G1126800;MD08G1125600;MD08G1125200;MD08G1125300;MD08G1125900
741	MSTRG.100873.1	MD12G1197100;MD12G1197800;MD12G1196700;MD12G1196900;MD12G1197700;MD12G1198300;MD12G1197500;MD12G1198600;MD12G1197300;MD12G1198000;MD12G1196800;MD12G1198500;MD12G1197600;MD12G1198400;MD12G1197400;MD12G1197200;MD12G1198100;MD12G1197900;MD12G1197000
742	MSTRG.91135.3	MD11G1183500;MD11G1183800;MD11G1183600;MD11G1183900
743	MSTRG.6732.18	MD00G1190000;MD00G1190500;MD00G1189900;MD00G1190200
744	MSTRG.92134.1	MD11G1211700;MD11G1211400;MD11G1212100;MD11G1212000;MD11G1211300;MD11G1210700;MD11G1212200;MD11G1211000;MD11G1210900;MD11G1211800;MD11G1211100;MD11G1211500;MD11G1211900;MD11G1211600;MD11G1210800
745	MSTRG.125658.1	MD15G1299700;MD15G1300100;MD15G1299800;MD15G1300200;MD15G1299900;MD15G1300000
746	MSTRG.26593.2	MD03G1169400;MD03G1169700;MD03G1168900;MD03G1169900;MD03G1169600;MD03G1169100;MD03G1169800;MD03G1169200;MD03G1169300
747	MSTRG.138506.1	MD16G1278300;MD16G1278200;MD16G1278100;MD16G1277900;MD16G1278900;MD16G1278000;MD16G1279100;MD16G1279000
748	MSTRG.28579.1	MD03G1237900;MD03G1237500;MD03G1236700;MD03G1237800;MD03G1238800;MD03G1237000;MD03G1237200;MD03G1238600;MD03G1237600;MD03G1238300;MD03G1237100;MD03G1236600;MD03G1238400;MD03G1237700;MD03G1238700;MD03G1237300;MD03G1236800;MD03G1238000
749	MSTRG.20438.5	MD02G1257700;MD02G1258600;MD02G1258300;MD02G1258400;MD02G1257900;MD02G1258000;MD02G1258500;MD02G1257800;MD02G1258100;MD02G1258200;MD02G1258700;MD02G1257600
750	MSTRG.35457.7	MD04G1185700;MD04G1184500;MD04G1184300;MD04G1186100;MD04G1186300;MD04G1185900;MD04G1184600;MD04G1186000;MD04G1184800;MD04G1185600;MD04G1184900;MD04G1185100;MD04G1185000;MD04G1184400;MD04G1185800;MD04G1186200;MD04G1184000;MD04G1184100;MD04G1184700
751	MSTRG.136005.1	MD16G1215300;MD16G1215500;MD16G1215400;MD16G1215700;MD16G1215200
752	MSTRG.15520.1	MD02G1077400;MD02G1079200;MD02G1077200;MD02G1076800;MD02G1078700;MD02G1077800;MD02G1079300;MD02G1079500;MD02G1078500;MD02G1076500;MD02G1078400;MD02G1079400;MD02G1077300;MD02G1077900;MD02G1076600;MD02G1077600;MD02G1078600;MD02G1076700;MD02G1077000;MD02G1076900;MD02G1077700;MD02G1077500
753	MSTRG.96176.1	MD12G1041800;MD12G1042500;MD12G1041500;MD12G1041600;MD12G1041300;MD12G1041000;MD12G1042400;MD12G1041200;MD12G1041400;MD12G1041700;MD12G1042000;MD12G1041900;MD12G1042300
754	MSTRG.121644.8	MD15G1154300;MD15G1154600;MD15G1153100;MD15G1155000;MD15G1153200;MD15G1153400;MD15G1153500;MD15G1153800;MD15G1154200;MD15G1154000;MD15G1155100;MD15G1154900;MD15G1153300;MD15G1154500;MD15G1153600;MD15G1154700;MD15G1154800
755	MSTRG.88772.2	MD11G1102300;MD11G1103200;MD11G1102400;MD11G1103000;MD11G1103500;MD11G1102100;MD11G1103400;MD11G1103300;MD11G1102200;MD11G1103100;MD11G1103600
756	MSTRG.82133.1	MD10G1165600;MD10G1164200;MD10G1165100;MD10G1165000;MD10G1165300;MD10G1164100;MD10G1163900;MD10G1164400;MD10G1165500;MD10G1165400;MD10G1164300;MD10G1165900;MD10G1165800;MD10G1164500;MD10G1165200;MD10G1163800;MD10G1164600;MD10G1164000
757	MSTRG.107460.2	MD13G1194400;MD13G1193100;MD13G1193800;MD13G1194100;MD13G1193000;MD13G1193500;MD13G1194500;MD13G1194700;MD13G1192900;MD13G1194800;MD13G1194600;MD13G1193400;MD13G1193900;MD13G1194000;MD13G1193700;MD13G1193600;MD13G1194200
758	MSTRG.143562.1	MD17G1179500
759	MSTRG.92282.1	MD11G1217500;MD11G1216700;MD11G1216100;MD11G1217400;MD11G1217300;MD11G1216300;MD11G1216500;MD11G1216200;MD11G1216600;MD11G1216400;MD11G1217000;MD11G1216000;MD11G1217200;MD11G1217100
760	MSTRG.122011.1	MD15G1167500;MD15G1166800;MD15G1167200;MD15G1167100;MD15G1166700;MD15G1167000;MD15G1167300;MD15G1166900;MD15G1167400
761	MSTRG.134752.1	MD16G1172800;MD16G1172500;MD16G1172000;MD16G1173200;MD16G1172700;MD16G1173300;MD16G1173500;MD16G1172900;MD16G1172100;MD16G1172600;MD16G1173400;MD16G1172400;MD16G1173100;MD16G1171900;MD16G1173600;MD16G1172200
762	MSTRG.72760.1	MD09G1161800;MD09G1160800;MD09G1161600;MD09G1160700;MD09G1162000;MD09G1160600;MD09G1160900;MD09G1161100;MD09G1160500;MD09G1161400;MD09G1161700;MD09G1160400;MD09G1161200;MD09G1161300;MD09G1161500;MD09G1161000;MD09G1161900;MD09G1162100
763	MSTRG.108128.1	MD13G1213300;MD13G1213400;MD13G1213600;MD13G1214000;MD13G1213500;MD13G1213900;MD13G1213200
764	MSTRG.65737.11	MD08G1148700;MD08G1148100;MD08G1148500;MD08G1147300;MD08G1147000;MD08G1149100;MD08G1148300;MD08G1147100;MD08G1149000;MD08G1147200;MD08G1147400;MD08G1148900;MD08G1148800;MD08G1147500;MD08G1147800
765	MSTRG.126909.3	MD15G1336900;MD15G1337100;MD15G1337200;MD15G1337500
766	MSTRG.39964.2	MD05G1091100;MD05G1091300;MD05G1091000;MD05G1091200;MD05G1090800;MD05G1091400
767	MSTRG.39847.1	MD05G1086500;MD05G1086900;MD05G1086600;MD05G1086700;MD05G1087200;MD05G1087100
768	MSTRG.34710.3	MD04G1159400;MD04G1158000;MD04G1158900;MD04G1158600;MD04G1159200;MD04G1157700;MD04G1158700;MD04G1159500;MD04G1157800;MD04G1159100;MD04G1158200;MD04G1158500;MD04G1159300;MD04G1159700;MD04G1158300
769	MSTRG.28908.1	MD03G1248800;MD03G1250000;MD03G1249700;MD03G1248700;MD03G1249200;MD03G1248900;MD03G1249500;MD03G1249000;MD03G1249100;MD03G1249600
770	MSTRG.39301.24	MD05G1070100;MD05G1070300;MD05G1070000;MD05G1069700;MD05G1069900;MD05G1070200
771	MSTRG.5128.2	MD00G1147200;MD00G1147000;MD00G1147800;MD00G1147600;MD00G1147700;MD00G1146900;MD00G1147300;MD00G1147100
772	MSTRG.45781.1	MD05G1321300;MD05G1320500;MD05G1322000;MD05G1320400;MD05G1321800;MD05G1322100;MD05G1320900;MD05G1320200;MD05G1320600;MD05G1321100;MD05G1321000;MD05G1321500;MD05G1321700;MD05G1320300;MD05G1321200;MD05G1320800;MD05G1321900;MD05G1321600;MD05G1320700
773	MSTRG.43819.1	MD05G1239400;MD05G1238700;MD05G1239000;MD05G1238200;MD05G1238300;MD05G1238000;MD05G1239200;MD05G1238500;MD05G1239500;MD05G1239900;MD05G1239600;MD05G1240100;MD05G1239300;MD05G1238400;MD05G1238600;MD05G1238100;MD05G1239100;MD05G1237800;MD05G1238900;MD05G1238800;MD05G1237700;MD05G1239800;MD05G1240000
774	MSTRG.107415.1	MD13G1191900;MD13G1192000;MD13G1192200;MD13G1192300;MD13G1192700;MD13G1192100;MD13G1192800;MD13G1192400;MD13G1192500
775	MSTRG.24806.9	MD03G1120400;MD03G1119400;MD03G1119600;MD03G1119800;MD03G1119500;MD03G1120300;MD03G1120200;MD03G1119900;MD03G1119700;MD03G1120000
776	MSTRG.73166.1	MD09G1173400;MD09G1174400;MD09G1174700;MD09G1173800;MD09G1173300;MD09G1173500;MD09G1175000;MD09G1174800;MD09G1174600;MD09G1173200;MD09G1174900;MD09G1173700;MD09G1173600;MD09G1174000;MD09G1174100;MD09G1174500
777	MSTRG.76171.4	MD09G1260200;MD09G1261500;MD09G1260900;MD09G1261000;MD09G1260100;MD09G1261100;MD09G1260400;MD09G1261200;MD09G1261400;MD09G1260700;MD09G1260800;MD09G1260600;MD09G1260500
778	MSTRG.35437.5	MD04G1183500;MD04G1183400;MD04G1183700;MD04G1184300;MD04G1184500;MD04G1183200;MD04G1184900;MD04G1184800;MD04G1184600;MD04G1183300;MD04G1183800;MD04G1183600;MD04G1184400;MD04G1184700;MD04G1183900;MD04G1183100;MD04G1184000;MD04G1184100
779	MSTRG.88443.19	MD11G1084400;MD11G1084800;MD11G1085100;MD11G1084500;MD11G1085500;MD11G1086000;MD11G1084000;MD11G1084900;MD11G1086200;MD11G1086300;MD11G1084100;MD11G1085200;MD11G1084700;MD11G1086500;MD11G1084300;MD11G1085000;MD11G1084200;MD11G1086600;MD11G1085400;MD11G1086400;MD11G1085800;MD11G1085600;MD11G1084600;MD11G1085700
780	MSTRG.16158.2	MD02G1106900;MD02G1105400;MD02G1105300;MD02G1106200;MD02G1106400;MD02G1105900;MD02G1106000;MD02G1107000;MD02G1107100;MD02G1105000;MD02G1106800;MD02G1105800;MD02G1104900;MD02G1106500;MD02G1107300;MD02G1105100;MD02G1105700;MD02G1107200;MD02G1106300;MD02G1105200;MD02G1106700;MD02G1106600;MD02G1105500
781	MSTRG.113208.1	MD14G1082800;MD14G1083200;MD14G1082900;MD14G1083100;MD14G1082600
782	MSTRG.89863.1	MD11G1148800;MD11G1149000;MD11G1149200;MD11G1148300;MD11G1149100;MD11G1148000;MD11G1148600;MD11G1148200;MD11G1148100;MD11G1148500;MD11G1148900
783	MSTRG.145120.1	MD17G1231300;MD17G1230500;MD17G1229900;MD17G1230300;MD17G1230000;MD17G1230200;MD17G1231200;MD17G1231600;MD17G1230100;MD17G1231100;MD17G1231000;MD17G1230800;MD17G1230700;MD17G1230900
784	MSTRG.39070.1	MD05G1065100;MD05G1065000
785	MSTRG.12220.1	MD01G1166400;MD01G1166500;MD01G1165300;MD01G1165600;MD01G1166600;MD01G1166200;MD01G1165800;MD01G1166000;MD01G1166300;MD01G1166100;MD01G1165900;MD01G1165400
786	MSTRG.105558.3	MD13G1126300;MD13G1126900;MD13G1126700;MD13G1127000;MD13G1126800;MD13G1126600;MD13G1127100;MD13G1126200;MD13G1126400
787	MSTRG.79939.5	MD10G1091600;MD10G1091900;MD10G1091500;MD10G1091400
788	MSTRG.29923.2	MD03G1294700;MD03G1296100;MD03G1294800;MD03G1294500;MD03G1296200;MD03G1295100;MD03G1295700;MD03G1293900;MD03G1293800;MD03G1293100;MD03G1294300;MD03G1294400;MD03G1294200;MD03G1293200;MD03G1293300;MD03G1295200;MD03G1293700;MD03G1294100;MD03G1295800;MD03G1293600;MD03G1295600;MD03G1295400;MD03G1293400;MD03G1295300;MD03G1294600;MD03G1295900;MD03G1296000
789	MSTRG.32245.1	MD04G1075600;MD04G1075700;MD04G1075500;MD04G1075800
790	MSTRG.55733.12	MD07G1091000;MD07G1090600;MD07G1090300;MD07G1090700;MD07G1090400;MD07G1090200;MD07G1090800;MD07G1090900;MD07G1091100
791	MSTRG.83050.1	MD10G1196800;MD10G1195900;MD10G1195800;MD10G1195300;MD10G1196500;MD10G1196900;MD10G1196600;MD10G1197300;MD10G1196700;MD10G1197600;MD10G1195600;MD10G1195500;MD10G1197400;MD10G1196300;MD10G1196000;MD10G1195700;MD10G1196400;MD10G1196100;MD10G1197500;MD10G1195400;MD10G1197200;MD10G1197100;MD10G1195200;MD10G1196200
792	MSTRG.67046.3	MD08G1185400;MD08G1185500;MD08G1185200;MD08G1185000;MD08G1185600;MD08G1185100;MD08G1185700
793	MSTRG.45628.4	MD05G1311500;MD05G1311400;MD05G1310700;MD05G1312200;MD05G1311900;MD05G1311300;MD05G1312400;MD05G1311700;MD05G1310900;MD05G1310800;MD05G1312100;MD05G1311000;MD05G1312300;MD05G1311100;MD05G1311200;MD05G1311600;MD05G1311800;MD05G1312000
794	MSTRG.10722.11	MD01G1104800;MD01G1104300;MD01G1105600;MD01G1105700;MD01G1106100;MD01G1105400;MD01G1106000;MD01G1105500;MD01G1105100;MD01G1105000;MD01G1105200;MD01G1105900;MD01G1105800;MD01G1104600;MD01G1104900;MD01G1104700
795	MSTRG.97931.1	MD12G1099700;MD12G1099100;MD12G1099600;MD12G1098600;MD12G1099900;MD12G1098800;MD12G1098500;MD12G1098700;MD12G1098200;MD12G1098900;MD12G1099300;MD12G1099000;MD12G1098300;MD12G1099200;MD12G1099400;MD12G1099500;MD12G1099800
796	MSTRG.141754.10	MD17G1122900;MD17G1121200;MD17G1122600;MD17G1121900;MD17G1120900;MD17G1121100;MD17G1120700;MD17G1122400;MD17G1122800;MD17G1122000;MD17G1122100;MD17G1123000;MD17G1121500;MD17G1120300;MD17G1122700;MD17G1120500;MD17G1121800;MD17G1120800;MD17G1121400;MD17G1122500;MD17G1121000;MD17G1122200;MD17G1121600;MD17G1121300
797	MSTRG.2214.6	MD00G1067800;MD00G1068100;MD00G1067900;MD00G1068300;MD00G1068000
798	MSTRG.83925.10	MD10G1232700;MD10G1231200;MD10G1232100;MD10G1233500;MD10G1231500;MD10G1232300;MD10G1231800;MD10G1231300;MD10G1231700;MD10G1233600;MD10G1232800;MD10G1232400;MD10G1232500;MD10G1233400;MD10G1232000;MD10G1232200;MD10G1232600;MD10G1233000;MD10G1231600;MD10G1231400;MD10G1231900;MD10G1233100;MD10G1232900;MD10G1233300;MD10G1233200
799	MSTRG.51286.3	MD06G1143900;MD06G1144800;MD06G1143400;MD06G1144000;MD06G1143000;MD06G1143600;MD06G1145400;MD06G1144200;MD06G1145700;MD06G1144300;MD06G1144100;MD06G1145100;MD06G1146100;MD06G1145200;MD06G1145800;MD06G1143700;MD06G1145600;MD06G1145500;MD06G1145000;MD06G1143500;MD06G1145300;MD06G1146000;MD06G1146200;MD06G1143300;MD06G1145900
800	MSTRG.30975.1	MD04G1032000;MD04G1031500;MD04G1031400;MD04G1032400;MD04G1031300;MD04G1031900;MD04G1031800;MD04G1031600;MD04G1031200;MD04G1031100;MD04G1032200
801	MSTRG.99153.6	MD12G1133700;MD12G1134300;MD12G1134000;MD12G1133600;MD12G1133000;MD12G1133800;MD12G1133300;MD12G1134200;MD12G1132900;MD12G1134100;MD12G1133200
802	MSTRG.80613.3	MD10G1112200;MD10G1112700;MD10G1112000;MD10G1112300;MD10G1112800;MD10G1112900;MD10G1112600;MD10G1112400;MD10G1112500
803	MSTRG.24817.2	MD03G1120200;MD03G1120700;MD03G1120600;MD03G1120300;MD03G1120400;MD03G1120500;MD03G1120800
804	MSTRG.124995.1	MD15G1278000;MD15G1278200;MD15G1278600;MD15G1278300;MD15G1278400;MD15G1277800;MD15G1277900;MD15G1277700;MD15G1278100
805	MSTRG.120776.1	MD15G1123100;MD15G1121900;MD15G1121700;MD15G1121400;MD15G1122000;MD15G1122800;MD15G1122300;MD15G1122100;MD15G1122600;MD15G1123000;MD15G1122900;MD15G1122700;MD15G1122400;MD15G1121500;MD15G1121800
806	MSTRG.75076.14	MD09G1224900;MD09G1225200;MD09G1225800;MD09G1225700;MD09G1225500;MD09G1225600;MD09G1225000
807	MSTRG.54088.2	MD07G1017500;MD07G1016900;MD07G1017800;MD07G1017900;MD07G1015500;MD07G1016800;MD07G1017600;MD07G1016700;MD07G1015800;MD07G1015900;MD07G1016000;MD07G1018200;MD07G1016600;MD07G1017100;MD07G1018100;MD07G1018000;MD07G1017200;MD07G1017300;MD07G1015700;MD07G1016100;MD07G1017000;MD07G1015600;MD07G1016500;MD07G1016300;MD07G1017700;MD07G1016200;MD07G1017400;MD07G1016400
808	MSTRG.5097.17	MD00G1146200;MD00G1146300;MD00G1145600;MD00G1145700;MD00G1146600
809	MSTRG.44610.25	MD05G1270000;MD05G1269000;MD05G1269700;MD05G1269100;MD05G1268400;MD05G1268700;MD05G1267900;MD05G1268600;MD05G1268500;MD05G1268000;MD05G1269300;MD05G1268900;MD05G1269800;MD05G1268100;MD05G1269900;MD05G1269200;MD05G1268200;MD05G1269500;MD05G1269600;MD05G1269400;MD05G1268800
810	MSTRG.131512.1	MD16G1047400;MD16G1049600;MD16G1048700;MD16G1048100;MD16G1048300;MD16G1048500;MD16G1049000;MD16G1048900;MD16G1047700;MD16G1048200;MD16G1048600;MD16G1049500;MD16G1047600;MD16G1048400;MD16G1049100;MD16G1049400;MD16G1049800;MD16G1047500;MD16G1049300;MD16G1047800;MD16G1049700
811	MSTRG.76048.7	MD09G1257600;MD09G1257400;MD09G1257900;MD09G1256700;MD09G1257000;MD09G1258000;MD09G1258200;MD09G1258100;MD09G1257100;MD09G1256800;MD09G1257200;MD09G1257300;MD09G1257800;MD09G1256600;MD09G1258300
812	MSTRG.43101.1	MD05G1209300;MD05G1209200;MD05G1208500;MD05G1208600;MD05G1209100;MD05G1208800;MD05G1208000;MD05G1208900;MD05G1208400;MD05G1208300;MD05G1209000;MD05G1208700;MD05G1209400;MD05G1207900
813	MSTRG.125567.1	MD15G1296500;MD15G1296400;MD15G1295900;MD15G1296300;MD15G1296100;MD15G1297100;MD15G1296700;MD15G1297000;MD15G1296000
814	MSTRG.37053.3	MD05G1003300;MD05G1002200;MD05G1003400;MD05G1002500;MD05G1002900;MD05G1002700;MD05G1002400;MD05G1002100;MD05G1003000;MD05G1003200;MD05G1002800;MD05G1002600;MD05G1003100;MD05G1002300
815	MSTRG.43544.4	MD05G1227000;MD05G1226600;MD05G1226300;MD05G1226700;MD05G1226500;MD05G1227100;MD05G1226200;MD05G1226900;MD05G1226800;MD05G1226400
816	MSTRG.15238.1	MD02G1064700;MD02G1064300;MD02G1064900;MD02G1064200;MD02G1063800;MD02G1064000;MD02G1064800;MD02G1065100;MD02G1064100;MD02G1064400;MD02G1065000;MD02G1063600;MD02G1065200;MD02G1065300;MD02G1064500;MD02G1063900
817	MSTRG.43798.2	MD05G1238400;MD05G1239300;MD05G1237600;MD05G1237200;MD05G1237700;MD05G1238800;MD05G1238900;MD05G1239100;MD05G1237800;MD05G1238100;MD05G1238600;MD05G1238300;MD05G1237300;MD05G1238200;MD05G1238700;MD05G1239400;MD05G1239000;MD05G1239500;MD05G1238500;MD05G1239200;MD05G1238000;MD05G1237500;MD05G1237400
818	MSTRG.34996.1	MD04G1168800;MD04G1169300;MD04G1169100;MD04G1168100;MD04G1169400;MD04G1168900;MD04G1168600;MD04G1168500;MD04G1168400;MD04G1169200;MD04G1168700;MD04G1168200;MD04G1168300
819	MSTRG.33814.29	MD04G1123500;MD04G1123600;MD04G1123100;MD04G1123800;MD04G1123400;MD04G1123300;MD04G1124100;MD04G1123200;MD04G1123900
820	MSTRG.143557.1	MD17G1179300;MD17G1179100
821	MSTRG.84281.1	MD10G1247100;MD10G1247600;MD10G1247300;MD10G1247800;MD10G1247700;MD10G1248700;MD10G1248000;MD10G1248900;MD10G1247200;MD10G1249300;MD10G1247400;MD10G1248500;MD10G1249100;MD10G1249400;MD10G1247000;MD10G1248800;MD10G1247900;MD10G1248600;MD10G1249900;MD10G1249200;MD10G1249600;MD10G1249500;MD10G1249800;MD10G1249000;MD10G1247500
822	MSTRG.31060.9	MD04G1034600;MD04G1034900;MD04G1034500;MD04G1033800;MD04G1035400;MD04G1034700;MD04G1034100;MD04G1034000;MD04G1035200;MD04G1033600;MD04G1033900;MD04G1034400;MD04G1035100;MD04G1034200;MD04G1035300;MD04G1035000
823	MSTRG.137093.5	MD16G1244900;MD16G1245600;MD16G1245000;MD16G1245200;MD16G1245500;MD16G1245100
824	MSTRG.41490.1	MD05G1142600;MD05G1142900;MD05G1141600;MD05G1142400;MD05G1142000;MD05G1141900;MD05G1141700;MD05G1142800;MD05G1142500;MD05G1141800;MD05G1142200;MD05G1142300;MD05G1142100;MD05G1142700
825	MSTRG.47973.3	MD06G1038600;MD06G1038800;MD06G1038400;MD06G1039400;MD06G1039500;MD06G1039100;MD06G1038500;MD06G1038900;MD06G1038700;MD06G1039000
826	MSTRG.51370.2	MD06G1148500;MD06G1148200;MD06G1148400;MD06G1147800;MD06G1148600;MD06G1148000;MD06G1147900;MD06G1148700;MD06G1147700;MD06G1148800
827	MSTRG.136326.1	MD16G1224000;MD16G1223900;MD16G1223300;MD16G1224200;MD16G1223200;MD16G1223400;MD16G1223800;MD16G1224100;MD16G1224300;MD16G1223600;MD16G1223700;MD16G1223500
828	MSTRG.10137.10	MD01G1083800;MD01G1083500;MD01G1083900;MD01G1083700;MD01G1085300;MD01G1085400;MD01G1085200;MD01G1084400;MD01G1085500;MD01G1083600;MD01G1084900;MD01G1085000;MD01G1084000;MD01G1084300;MD01G1084700;MD01G1084800;MD01G1084100
829	MSTRG.23445.5	MD03G1067800;MD03G1068100;MD03G1067100;MD03G1066400;MD03G1066200;MD03G1066500;MD03G1067300;MD03G1067600;MD03G1066600;MD03G1066900;MD03G1067400;MD03G1066300;MD03G1068000;MD03G1066000;MD03G1067900;MD03G1067500;MD03G1067700;MD03G1066700;MD03G1067200
830	MSTRG.128108.7	MD15G1372200;MD15G1372000;MD15G1371800;MD15G1372100;MD15G1370900
831	MSTRG.6641.1	MD00G1189000;MD00G1188600;MD00G1188700;MD00G1188900;MD00G1188500
832	MSTRG.142951.1	MD17G1163900;MD17G1163400;MD17G1163300;MD17G1162100;MD17G1164100;MD17G1164300;MD17G1163500;MD17G1163800;MD17G1162500;MD17G1164200;MD17G1164000;MD17G1162300;MD17G1162400;MD17G1163600;MD17G1163700;MD17G1162700;MD17G1162200;MD17G1162600
833	MSTRG.92221.2	MD11G1214500;MD11G1214700;MD11G1214900;MD11G1213800;MD11G1215100;MD11G1213900;MD11G1214800;MD11G1214300;MD11G1213500;MD11G1213600;MD11G1214000;MD11G1214400;MD11G1215000;MD11G1214100;MD11G1213700
834	MSTRG.39548.1	MD05G1077500;MD05G1077900;MD05G1077300;MD05G1079300;MD05G1079200;MD05G1077200;MD05G1079400;MD05G1078800;MD05G1077400;MD05G1078000;MD05G1079100;MD05G1077700;MD05G1078700;MD05G1078400;MD05G1077600;MD05G1078200;MD05G1079000;MD05G1078500;MD05G1078900;MD05G1078600;MD05G1078300
835	MSTRG.66060.3	MD08G1156800;MD08G1156000;MD08G1157300;MD08G1155700;MD08G1156500;MD08G1156900;MD08G1156300;MD08G1156100;MD08G1157400;MD08G1156200;MD08G1157200;MD08G1155800;MD08G1157000;MD08G1157100;MD08G1155900;MD08G1156700;MD08G1155600;MD08G1156600
836	MSTRG.124896.3	MD15G1274800;MD15G1273900;MD15G1274900;MD15G1274600;MD15G1274400;MD15G1275000
837	MSTRG.67580.1	MD08G1200800;MD08G1200900;MD08G1201200;MD08G1201400;MD08G1200700;MD08G1201300;MD08G1200600;MD08G1201700;MD08G1201000;MD08G1201600;MD08G1200500
838	MSTRG.72470.1	MD09G1151500;MD09G1150400;MD09G1151100;MD09G1150300;MD09G1150200;MD09G1150600;MD09G1150000;MD09G1149900;MD09G1151600;MD09G1150500;MD09G1151000;MD09G1151200;MD09G1151400;MD09G1151300;MD09G1150100;MD09G1150900;MD09G1150800;MD09G1150700
839	MSTRG.4770.1	MD00G1138000;MD00G1138200;MD00G1137900;MD00G1137700;MD00G1137300;MD00G1137800;MD00G1137200;MD00G1137100;MD00G1138300
840	MSTRG.63376.1	MD08G1062500;MD08G1062800;MD08G1062700;MD08G1062400;MD08G1063400;MD08G1062200;MD08G1062300;MD08G1062900;MD08G1063700;MD08G1063100;MD08G1062600;MD08G1063000;MD08G1063500;MD08G1062000;MD08G1063600;MD08G1063300;MD08G1063800;MD08G1062100
841	MSTRG.108074.2	MD13G1212700;MD13G1212500;MD13G1211900;MD13G1212000;MD13G1211600;MD13G1212100;MD13G1212300;MD13G1212600;MD13G1211700;MD13G1212200;MD13G1211100;MD13G1211400;MD13G1211200;MD13G1212400;MD13G1211800
842	MSTRG.82433.1	MD10G1175500;MD10G1176600;MD10G1176500;MD10G1175900;MD10G1176200;MD10G1176300;MD10G1175600;MD10G1176100;MD10G1175300;MD10G1176000;MD10G1175400;MD10G1175800;MD10G1175700;MD10G1176400
843	MSTRG.49850.13	MD06G1092100;MD06G1092700;MD06G1092800;MD06G1092200;MD06G1091900;MD06G1092300;MD06G1091700;MD06G1092000;MD06G1091800;MD06G1092400;MD06G1091600;MD06G1092500
844	MSTRG.132050.10	MD16G1070400;MD16G1071200;MD16G1071800;MD16G1072100;MD16G1070200;MD16G1070800;MD16G1070600;MD16G1071400;MD16G1071300;MD16G1070300;MD16G1071900;MD16G1070700;MD16G1072800;MD16G1072700;MD16G1072300;MD16G1072000;MD16G1071600;MD16G1070500;MD16G1072600;MD16G1072400;MD16G1072500;MD16G1071700
845	MSTRG.132356.12	MD16G1083800;MD16G1083700;MD16G1084000;MD16G1082600;MD16G1082900;MD16G1084800;MD16G1083100;MD16G1082300;MD16G1082500;MD16G1083500;MD16G1082700;MD16G1084200;MD16G1084300;MD16G1082200;MD16G1084700;MD16G1083200;MD16G1084100;MD16G1082000;MD16G1082100;MD16G1083600;MD16G1083900;MD16G1083300;MD16G1083000;MD16G1082400;MD16G1084400;MD16G1081900;MD16G1082800
846	MSTRG.6414.2	MD00G1181500;MD00G1181700;MD00G1181800;MD00G1181600
847	MSTRG.94328.1	MD11G1285900;MD11G1286300;MD11G1285800;MD11G1286400;MD11G1286000;MD11G1286200;MD11G1285700;MD11G1286100;MD11G1286500
848	MSTRG.40490.4	MD05G1108500;MD05G1108000;MD05G1107900;MD05G1108300;MD05G1108200;MD05G1108600;MD05G1108700;MD05G1108100;MD05G1108400
849	MSTRG.87552.5	MD11G1043500;MD11G1042500;MD11G1043200;MD11G1042900;MD11G1043400;MD11G1042600;MD11G1042800;MD11G1042000;MD11G1042100;MD11G1042300;MD11G1042200;MD11G1042400;MD11G1043600;MD11G1043100;MD11G1043000;MD11G1043300;MD11G1042700
850	MSTRG.9511.1	MD01G1059900;MD01G1061500;MD01G1060800;MD01G1061600;MD01G1061000;MD01G1060700;MD01G1060600;MD01G1060400;MD01G1061700;MD01G1060200;MD01G1060900;MD01G1061400;MD01G1060500;MD01G1060300
851	MSTRG.31954.1	MD04G1064100;MD04G1064000;MD04G1064200
852	MSTRG.74403.4	MD09G1210700;MD09G1211700;MD09G1212000;MD09G1211600;MD09G1211500;MD09G1211800;MD09G1210600;MD09G1211300;MD09G1210900;MD09G1210500;MD09G1211100;MD09G1210800;MD09G1211900;MD09G1211000
853	MSTRG.90044.2	MD11G1155700;MD11G1154500;MD11G1155100;MD11G1154600;MD11G1154700;MD11G1156100;MD11G1155900;MD11G1154900;MD11G1155000;MD11G1155800;MD11G1156000
854	MSTRG.19798.2	MD02G1230600;MD02G1231900;MD02G1232000;MD02G1230400;MD02G1231800;MD02G1231000;MD02G1230200;MD02G1231200;MD02G1232100;MD02G1230800;MD02G1231100;MD02G1230700;MD02G1231700;MD02G1230500;MD02G1230900
855	MSTRG.125268.1	MD15G1286900;MD15G1287100;MD15G1286600;MD15G1286700;MD15G1286500;MD15G1287300;MD15G1287000;MD15G1286800;MD15G1287200
856	MSTRG.9843.1	MD01G1073400;MD01G1072900;MD01G1073600;MD01G1073300;MD01G1073700;MD01G1073000;MD01G1073900;MD01G1073800;MD01G1073500;MD01G1073200;MD01G1073100;MD01G1074000
857	MSTRG.104381.41	MD13G1081200;MD13G1082600;MD13G1084200;MD13G1081700;MD13G1081900;MD13G1081600;MD13G1081300;MD13G1084100;MD13G1084300;MD13G1082200;MD13G1083600;MD13G1082800;MD13G1082500;MD13G1083200;MD13G1084400;MD13G1082700;MD13G1083400;MD13G1084500;MD13G1082400;MD13G1082300;MD13G1081800;MD13G1083500;MD13G1082900;MD13G1081400;MD13G1083000;MD13G1082000;MD13G1082100;MD13G1081500;MD13G1083700
858	MSTRG.141697.1	MD17G1118700;MD17G1118800;MD17G1118900;MD17G1119100;MD17G1118500;MD17G1118400;MD17G1119400;MD17G1119500;MD17G1119700;MD17G1119800;MD17G1118200;MD17G1118100;MD17G1118300;MD17G1119600;MD17G1119900;MD17G1119200;MD17G1118600;MD17G1120000;MD17G1118000
859	MSTRG.134720.3	MD16G1170800;MD16G1171100;MD16G1171300;MD16G1170900;MD16G1171400;MD16G1171700;MD16G1171500;MD16G1171800
860	MSTRG.43130.1	MD05G1209000;MD05G1208700;MD05G1208500;MD05G1210100;MD05G1209600;MD05G1210400;MD05G1210300;MD05G1209700;MD05G1209400;MD05G1209500;MD05G1210200;MD05G1209900;MD05G1210000;MD05G1209200;MD05G1209300;MD05G1209800;MD05G1208800;MD05G1208600;MD05G1208900
861	MSTRG.134947.1	MD16G1178100;MD16G1178700;MD16G1178300;MD16G1177900;MD16G1178900;MD16G1178600;MD16G1178800;MD16G1178000;MD16G1178200
862	MSTRG.138276.11	MD16G1273600;MD16G1273400;MD16G1273500;MD16G1273700
863	MSTRG.101847.2	MD12G1238600;MD12G1238400;MD12G1236900;MD12G1240100;MD12G1237300;MD12G1238700;MD12G1237400;MD12G1237800;MD12G1240300;MD12G1237200;MD12G1239300;MD12G1237700;MD12G1239000;MD12G1239400;MD12G1239500;MD12G1238500;MD12G1240000;MD12G1238100;MD12G1237500;MD12G1239600;MD12G1238300;MD12G1238000;MD12G1238900;MD12G1239200;MD12G1236700;MD12G1237600;MD12G1238200;MD12G1237100;MD12G1237000;MD12G1236600;MD12G1239…
864	MSTRG.79237.2	MD10G1074700;MD10G1073900;MD10G1074300;MD10G1074400;MD10G1074500;MD10G1074000;MD10G1074900;MD10G1074600
865	MSTRG.27713.1	MD03G1207400;MD03G1206500;MD03G1207600;MD03G1206400;MD03G1207700;MD03G1206600;MD03G1206700;MD03G1206800;MD03G1207100;MD03G1207000;MD03G1207300;MD03G1207200
866	MSTRG.19902.1	MD02G1237200;MD02G1236500;MD02G1237400;MD02G1236700;MD02G1237300;MD02G1236900;MD02G1236600;MD02G1236800
867	MSTRG.65424.1	MD08G1137000;MD08G1137400;MD08G1137500;MD08G1136900;MD08G1136700;MD08G1136800;MD08G1137200;MD08G1136600;MD08G1136500;MD08G1137300
868	MSTRG.913.4	MD00G1029100;MD00G1029500;MD00G1029400;MD00G1029000;MD00G1030300;MD00G1029300;MD00G1029200;MD00G1030000;MD00G1028900;MD00G1030400
869	MSTRG.84454.29	MD10G1258100;MD10G1258200;MD10G1257700;MD10G1256400;MD10G1256100;MD10G1257500;MD10G1257000;MD10G1255800;MD10G1258000;MD10G1256600;MD10G1256900;MD10G1256300;MD10G1256800;MD10G1257800;MD10G1257600;MD10G1257300;MD10G1256000;MD10G1255900;MD10G1257900;MD10G1256700;MD10G1256200
870	MSTRG.47591.9	MD06G1026900;MD06G1026700;MD06G1028400;MD06G1026600;MD06G1029100;MD06G1029000;MD06G1028500;MD06G1027400;MD06G1026800;MD06G1028600;MD06G1028900;MD06G1028800;MD06G1027100;MD06G1027200;MD06G1028300;MD06G1026500;MD06G1027300;MD06G1028700
871	MSTRG.92235.1	MD11G1215600;MD11G1215000;MD11G1214400;MD11G1215300;MD11G1215100;MD11G1215200;MD11G1215400;MD11G1214800;MD11G1214900;MD11G1214700;MD11G1214500;MD11G1215500
872	MSTRG.95940.1	MD12G1033800;MD12G1034900;MD12G1033900;MD12G1033700;MD12G1034200;MD12G1034500;MD12G1033200;MD12G1034000;MD12G1034600;MD12G1035200;MD12G1034100;MD12G1035100;MD12G1033400;MD12G1033600;MD12G1033500;MD12G1033300;MD12G1034800;MD12G1034700;MD12G1035000
873	MSTRG.15536.1	MD02G1079800;MD02G1079900;MD02G1078400;MD02G1079400;MD02G1078600;MD02G1078100;MD02G1078500;MD02G1079300;MD02G1079500;MD02G1080300;MD02G1079700;MD02G1079200;MD02G1078000;MD02G1078200;MD02G1080100;MD02G1079600;MD02G1080200;MD02G1080000;MD02G1078700
874	MSTRG.134953.1	MD16G1178200;MD16G1179300;MD16G1179200;MD16G1178400;MD16G1178800;MD16G1178000;MD16G1179500;MD16G1178900;MD16G1178300;MD16G1179400;MD16G1178600;MD16G1178700;MD16G1178100
875	MSTRG.28890.2	MD03G1249100;MD03G1249000;MD03G1249500;MD03G1248900;MD03G1249200;MD03G1248700;MD03G1249400;MD03G1248800;MD03G1248400;MD03G1248500;MD03G1248300;MD03G1248200
876	MSTRG.50893.1	MD06G1131500;MD06G1130900;MD06G1130200;MD06G1130100;MD06G1131300;MD06G1131200;MD06G1130700;MD06G1131100;MD06G1130400;MD06G1130300;MD06G1130800;MD06G1131400;MD06G1131000;MD06G1130000;MD06G1130500
877	MSTRG.99153.5	MD12G1133200;MD12G1132900;MD12G1134100;MD12G1133000;MD12G1133600;MD12G1133800;MD12G1133300;MD12G1134200;MD12G1133700;MD12G1134300;MD12G1134000
878	MSTRG.110912.2	MD14G1000600;MD14G1000100;MD14G1000500;MD14G1000700;MD14G1000200
879	MSTRG.134321.1	MD16G1157600;MD16G1158600;MD16G1158200;MD16G1157900;MD16G1158300;MD16G1157700;MD16G1158500;MD16G1158000;MD16G1158100;MD16G1157800;MD16G1159000;MD16G1158400;MD16G1158900;MD16G1158700;MD16G1158800
880	MSTRG.24295.10	MD03G1100600;MD03G1100100;MD03G1100500;MD03G1100400;MD03G1101800;MD03G1101200;MD03G1099900;MD03G1101500;MD03G1100000;MD03G1100900;MD03G1101700;MD03G1101300;MD03G1101600;MD03G1099700;MD03G1101000;MD03G1100700;MD03G1099800;MD03G1100200
881	MSTRG.126184.1	MD15G1315800;MD15G1315400;MD15G1315600;MD15G1315500;MD15G1315300
882	MSTRG.73560.1	MD09G1186800;MD09G1187300;MD09G1187900;MD09G1187000;MD09G1186700;MD09G1187200;MD09G1186500;MD09G1187500;MD09G1187700;MD09G1186900;MD09G1187400;MD09G1187600
883	MSTRG.83265.1	MD10G1204900;MD10G1203700;MD10G1204500;MD10G1203900;MD10G1205100;MD10G1204100;MD10G1204600;MD10G1205300;MD10G1205000;MD10G1203800;MD10G1204000;MD10G1204300;MD10G1204400;MD10G1204200;MD10G1204800;MD10G1205200
884	MSTRG.142424.1	MD17G1146400;MD17G1146300;MD17G1147500;MD17G1147100;MD17G1147000;MD17G1146200;MD17G1147200;MD17G1146600;MD17G1147700;MD17G1146700;MD17G1146500;MD17G1147400;MD17G1146800;MD17G1146900
885	MSTRG.141870.2	MD17G1126200;MD17G1126600;MD17G1126300;MD17G1125600;MD17G1126400;MD17G1125900;MD17G1126500;MD17G1125800;MD17G1126100;MD17G1126000;MD17G1125700;MD17G1126700
886	MSTRG.48913.1	MD06G1066300;MD06G1066400;MD06G1066000;MD06G1065900;MD06G1065700
887	MSTRG.92876.2	MD11G1236200;MD11G1236900;MD11G1237100;MD11G1236000;MD11G1236500;MD11G1236100;MD11G1236400;MD11G1237000;MD11G1235800;MD11G1236700;MD11G1235900;MD11G1236600
888	MSTRG.13176.1	MD01G1211900;MD01G1211500;MD01G1211000;MD01G1210300;MD01G1211600;MD01G1211800;MD01G1209700;MD01G1211400;MD01G1210800;MD01G1210200;MD01G1210500;MD01G1211100;MD01G1211200;MD01G1209800;MD01G1212200;MD01G1210700;MD01G1210100;MD01G1209900;MD01G1210000;MD01G1211300;MD01G1210900;MD01G1210600;MD01G1210400;MD01G1212300;MD01G1212100;MD01G1212000
889	MSTRG.85627.1	MD10G1300400;MD10G1300800;MD10G1301100;MD10G1299800;MD10G1299600;MD10G1299500;MD10G1300500;MD10G1300300;MD10G1300100;MD10G1299300;MD10G1299900;MD10G1300200;MD10G1299700;MD10G1300900;MD10G1300000;MD10G1300600;MD10G1299400;MD10G1300700;MD10G1301000
890	MSTRG.4770.2	MD00G1137200;MD00G1138300;MD00G1137100;MD00G1137800;MD00G1137700;MD00G1137900;MD00G1137300;MD00G1138000;MD00G1138200
891	MSTRG.139714.1	MD17G1038300;MD17G1039600;MD17G1039100;MD17G1037600;MD17G1038500;MD17G1038900;MD17G1038100;MD17G1037400;MD17G1038700;MD17G1037800;MD17G1039200;MD17G1039400;MD17G1038000;MD17G1038400;MD17G1039500;MD17G1037700;MD17G1037900;MD17G1039300;MD17G1037500;MD17G1039000;MD17G1038200;MD17G1038600;MD17G1038800
892	MSTRG.19904.1	MD02G1237200;MD02G1236500;MD02G1237400;MD02G1236700;MD02G1236900;MD02G1237300;MD02G1236600;MD02G1236800
893	MSTRG.116913.1	MD14G1209400;MD14G1210900;MD14G1210000;MD14G1210500;MD14G1209800;MD14G1210800;MD14G1212800;MD14G1210600;MD14G1211000;MD14G1210400;MD14G1212500;MD14G1210100;MD14G1212600;MD14G1212100;MD14G1211800;MD14G1210300;MD14G1211300;MD14G1211200;MD14G1212200;MD14G1212700;MD14G1209500;MD14G1211400;MD14G1211500;MD14G1212300;MD14G1212400;MD14G1209300;MD14G1211700;MD14G1209700;MD14G1209900;MD14G1212000;MD14G1211…
894	MSTRG.126326.1	MD15G1320800;MD15G1320700;MD15G1320400;MD15G1320300;MD15G1320500;MD15G1319800;MD15G1320200;MD15G1320600;MD15G1319900
895	MSTRG.69546.3	MD09G1022600;MD09G1022900;MD09G1027400;MD09G1026900;MD09G1023200;MD09G1026700;MD09G1026400;MD09G1023600;MD09G1023300;MD09G1024000;MD09G1027300;MD09G1027200;MD09G1026800;MD09G1023500;MD09G1027100;MD09G1022400;MD09G1022700;MD09G1027800;MD09G1027000;MD09G1026100;MD09G1027900;MD09G1026500;MD09G1027500;MD09G1023400;MD09G1026300;MD09G1023800;MD09G1026600;MD09G1026200;MD09G1027600;MD09G1022800;MD09G1023…
896	MSTRG.13643.1	MD01G1231400;MD01G1231000;MD01G1229200;MD01G1231300;MD01G1230500;MD01G1230900;MD01G1229700;MD01G1230300;MD01G1230000;MD01G1228800;MD01G1230400;MD01G1230100;MD01G1229100;MD01G1229800;MD01G1231100;MD01G1230200;MD01G1229500;MD01G1229400;MD01G1228900;MD01G1230800;MD01G1230700;MD01G1229900;MD01G1229000;MD01G1231200;MD01G1229300;MD01G1229600;MD01G1230600
897	MSTRG.88511.2	MD11G1092500;MD11G1091700;MD11G1092300;MD11G1091800;MD11G1092900;MD11G1091100;MD11G1091600;MD11G1092100;MD11G1090800;MD11G1092400;MD11G1091500;MD11G1093000;MD11G1092800;MD11G1091400;MD11G1091300;MD11G1091200;MD11G1092600;MD11G1090700;MD11G1091000;MD11G1092200;MD11G1091900;MD11G1093100
898	MSTRG.61358.1	MD07G1293400;MD07G1293200;MD07G1293300;MD07G1292200;MD07G1292800;MD07G1292100;MD07G1292500;MD07G1292900;MD07G1292700;MD07G1293100;MD07G1291900;MD07G1292300;MD07G1292000;MD07G1293000;MD07G1292400
899	MSTRG.59648.2	MD07G1216800;MD07G1216900;MD07G1217700;MD07G1216500;MD07G1217000;MD07G1217800;MD07G1217100;MD07G1217200;MD07G1216600;MD07G1217900;MD07G1216300
900	MSTRG.101551.1	MD12G1224000;MD12G1224900;MD12G1224100;MD12G1223800;MD12G1223900;MD12G1224200;MD12G1223400;MD12G1225700;MD12G1223600;MD12G1226000;MD12G1223700;MD12G1226400;MD12G1224400;MD12G1225900;MD12G1224500;MD12G1223500;MD12G1225800;MD12G1224600;MD12G1225300;MD12G1225200;MD12G1226200;MD12G1225600;MD12G1224300;MD12G1225100
901	MSTRG.73541.1	MD09G1186900;MD09G1187400;MD09G1187500;MD09G1187200;MD09G1186700;MD09G1186500;MD09G1186800;MD09G1187300;MD09G1187000
902	MSTRG.16307.1	MD02G1111400;MD02G1112100;MD02G1112400;MD02G1112300;MD02G1110500;MD02G1111800;MD02G1110800;MD02G1111300;MD02G1110700;MD02G1111200;MD02G1111100;MD02G1110600;MD02G1111700;MD02G1111500;MD02G1110900;MD02G1112200;MD02G1111900;MD02G1112000;MD02G1111600
903	MSTRG.105526.1	MD13G1124100;MD13G1123800;MD13G1124500;MD13G1125600;MD13G1125000;MD13G1124800;MD13G1125800;MD13G1125300;MD13G1125100;MD13G1125500;MD13G1124000;MD13G1124300;MD13G1125400;MD13G1125700;MD13G1124900;MD13G1124200
904	MSTRG.45057.1	MD05G1288800;MD05G1289100;MD05G1287600;MD05G1288200;MD05G1289000;MD05G1288500;MD05G1288100;MD05G1288000;MD05G1287500;MD05G1288900;MD05G1287700;MD05G1288700;MD05G1287900;MD05G1289200;MD05G1288300;MD05G1288400;MD05G1288600
905	MSTRG.72217.1	MD09G1142400;MD09G1141900;MD09G1142500;MD09G1141700;MD09G1141400;MD09G1141200;MD09G1142300;MD09G1142100;MD09G1141300;MD09G1140600;MD09G1140900;MD09G1141000;MD09G1142600;MD09G1140700;MD09G1141500;MD09G1141800;MD09G1141100;MD09G1140800;MD09G1142000;MD09G1141600;MD09G1142200
906	MSTRG.87116.1	MD11G1021800;MD11G1021700;MD11G1022300;MD11G1021200;MD11G1022900;MD11G1022700;MD11G1021500;MD11G1022500;MD11G1022200;MD11G1022800;MD11G1021400;MD11G1022400;MD11G1021100;MD11G1022600;MD11G1022000;MD11G1021900;MD11G1021300;MD11G1023000
907	MSTRG.81314.50	MD10G1137300;MD10G1137500;MD10G1136700;MD10G1136400;MD10G1136600;MD10G1138000;MD10G1137000;MD10G1137800;MD10G1136800;MD10G1136500;MD10G1137900;MD10G1137400;MD10G1137100;MD10G1137700;MD10G1137200
908	MSTRG.6638.9	MD00G1188500;MD00G1188900;MD00G1188700
909	MSTRG.131890.2	MD16G1062300;MD16G1063400;MD16G1063300;MD16G1063900;MD16G1064100;MD16G1063000;MD16G1062700;MD16G1062200;MD16G1066300;MD16G1064900;MD16G1065500;MD16G1064000;MD16G1063200;MD16G1062600;MD16G1066100;MD16G1064500;MD16G1065800;MD16G1064600;MD16G1064400;MD16G1062500;MD16G1063500;MD16G1062400;MD16G1065900;MD16G1065600;MD16G1065000;MD16G1062800;MD16G1064700;MD16G1064800;MD16G1063100;MD16G1062900;MD16G1065…
910	MSTRG.144191.5	MD17G1198300;MD17G1199300;MD17G1198800;MD17G1198700;MD17G1199100;MD17G1198900;MD17G1199200;MD17G1198500;MD17G1198400;MD17G1199000
911	MSTRG.60092.2	MD07G1236000;MD07G1235300;MD07G1235900;MD07G1236600;MD07G1235000;MD07G1235600;MD07G1236900;MD07G1236400;MD07G1237000;MD07G1234700;MD07G1237100;MD07G1235100;MD07G1236800;MD07G1235200;MD07G1235500;MD07G1234900;MD07G1236200;MD07G1236500;MD07G1234600;MD07G1236100;MD07G1234800;MD07G1236300;MD07G1235400;MD07G1235800;MD07G1235700;MD07G1237200
912	MSTRG.126465.2	MD15G1324200;MD15G1324500;MD15G1325000;MD15G1324900;MD15G1324800;MD15G1324100;MD15G1324700;MD15G1324000;MD15G1323600;MD15G1324300;MD15G1323700;MD15G1323900;MD15G1325100
913	MSTRG.81868.11	MD10G1155400;MD10G1155100;MD10G1156100;MD10G1155500;MD10G1155200;MD10G1155800;MD10G1156200;MD10G1156000;MD10G1155700;MD10G1156300
914	MSTRG.39808.1	MD05G1086200;MD05G1085700;MD05G1086100;MD05G1086300;MD05G1086000;MD05G1085800
915	MSTRG.35379.1	MD04G1181400;MD04G1182300;MD04G1182200;MD04G1182600;MD04G1181200;MD04G1181600;MD04G1181500;MD04G1181800;MD04G1182100;MD04G1182700;MD04G1182500;MD04G1182800;MD04G1181300
916	MSTRG.70163.1	MD09G1054400;MD09G1053500;MD09G1053700;MD09G1053400;MD09G1053100;MD09G1053900;MD09G1051500;MD09G1053600;MD09G1052900;MD09G1054500;MD09G1051900;MD09G1051700;MD09G1051600;MD09G1054200;MD09G1052100;MD09G1052000;MD09G1054600;MD09G1054700;MD09G1052300;MD09G1051400;MD09G1051800;MD09G1052600;MD09G1052800;MD09G1052700;MD09G1052200;MD09G1054100;MD09G1054000;MD09G1053000;MD09G1054300;MD09G1053300;MD09G1052…
917	MSTRG.8695.1	MD01G1035600;MD01G1036100;MD01G1036200;MD01G1035500;MD01G1035800;MD01G1035400
918	MSTRG.145852.2	MD17G1255500;MD17G1255200;MD17G1255600;MD17G1255400;MD17G1255300
919	MSTRG.20859.1	MD02G1272700;MD02G1273000;MD02G1272400;MD02G1273700;MD02G1272900;MD02G1272500;MD02G1273800;MD02G1273600;MD02G1273500;MD02G1272600;MD02G1273400;MD02G1272800;MD02G1273900;MD02G1273300
920	MSTRG.20237.2	MD02G1248100;MD02G1248800;MD02G1248700;MD02G1249500;MD02G1249200;MD02G1249700;MD02G1249600;MD02G1248300;MD02G1248200;MD02G1248900;MD02G1249300;MD02G1248400;MD02G1249400
921	MSTRG.55308.1	MD07G1076000;MD07G1074500;MD07G1074400;MD07G1075300;MD07G1074700;MD07G1075500;MD07G1075100;MD07G1075800;MD07G1074600;MD07G1075200;MD07G1074300;MD07G1075700;MD07G1075000;MD07G1075600;MD07G1075400
922	MSTRG.58149.1	MD07G1162900;MD07G1162800;MD07G1161600;MD07G1162500;MD07G1162000;MD07G1161500;MD07G1162300;MD07G1161300;MD07G1162400;MD07G1163000;MD07G1162700;MD07G1161400;MD07G1162200;MD07G1161700;MD07G1162600;MD07G1161800;MD07G1161900;MD07G1161200
923	MSTRG.34045.1	MD04G1131300;MD04G1133000;MD04G1132000;MD04G1131700;MD04G1132700;MD04G1132100;MD04G1131200;MD04G1131600;MD04G1132500;MD04G1131900;MD04G1131400;MD04G1131500;MD04G1132800;MD04G1132300;MD04G1133300;MD04G1133400;MD04G1131800;MD04G1132900
924	MSTRG.53943.1	MD07G1009100;MD07G1008700;MD07G1010400;MD07G1009400;MD07G1010300;MD07G1010200;MD07G1008900;MD07G1008600;MD07G1009300;MD07G1008500;MD07G1009500;MD07G1009600;MD07G1008300;MD07G1008800;MD07G1010100;MD07G1008400;MD07G1009200
925	MSTRG.70301.1	MD09G1059100;MD09G1058700;MD09G1058400;MD09G1059700;MD09G1060200;MD09G1059200;MD09G1059000;MD09G1058500;MD09G1058800;MD09G1059800;MD09G1059300;MD09G1060000;MD09G1060100;MD09G1059400;MD09G1058900;MD09G1059600;MD09G1059900;MD09G1058600
926	MSTRG.28293.1	MD03G1226900;MD03G1227700;MD03G1226700;MD03G1227300;MD03G1226300;MD03G1227000;MD03G1227400;MD03G1227600;MD03G1226600;MD03G1226000;MD03G1226400;MD03G1227500;MD03G1225700;MD03G1225800;MD03G1226800;MD03G1227200;MD03G1226500;MD03G1227100;MD03G1226200;MD03G1225900
927	MSTRG.129479.6	MD15G1415500;MD15G1416000;MD15G1415400;MD15G1415300;MD15G1415900;MD15G1415800;MD15G1416200;MD15G1416100;MD15G1415700;MD15G1415200;MD15G1415600
928	MSTRG.49850.7	MD06G1091600;MD06G1092500;MD06G1092400;MD06G1091700;MD06G1092000;MD06G1091800;MD06G1092300;MD06G1091900;MD06G1092700;MD06G1092800;MD06G1092200;MD06G1092100
929	MSTRG.55747.2	MD07G1091400;MD07G1090800;MD07G1091100;MD07G1090900;MD07G1091700;MD07G1091000;MD07G1090600;MD07G1091500;MD07G1091300;MD07G1091600;MD07G1090700
930	MSTRG.22445.30	MD03G1019300;MD03G1019700;MD03G1018000;MD03G1019500;MD03G1018300;MD03G1020100;MD03G1018600;MD03G1018400;MD03G1019400;MD03G1019600;MD03G1020200;MD03G1018900;MD03G1018100;MD03G1018700;MD03G1018500;MD03G1017800;MD03G1018200;MD03G1019900;MD03G1020000;MD03G1020300;MD03G1019800;MD03G1018800;MD03G1017700;MD03G1019000;MD03G1020400
931	MSTRG.65759.2	MD08G1149600;MD08G1149800;MD08G1150000;MD08G1149300;MD08G1149500;MD08G1149900;MD08G1149200;MD08G1150100;MD08G1149700;MD08G1149400
932	MSTRG.140970.1	MD17G1090100;MD17G1090300;MD17G1090900;MD17G1090800;MD17G1090200;MD17G1090000;MD17G1090400;MD17G1091000;MD17G1090600
933	MSTRG.9542.56	MD01G1062400;MD01G1062300;MD01G1062700;MD01G1063200;MD01G1061800;MD01G1063600;MD01G1061700;MD01G1063800;MD01G1062200;MD01G1062100;MD01G1062800;MD01G1063400;MD01G1061900;MD01G1063900;MD01G1062000;MD01G1062600;MD01G1062500;MD01G1063700;MD01G1063000;MD01G1063100;MD01G1063300;MD01G1061600
934	MSTRG.130037.4	MD15G1439000;MD15G1439100;MD15G1438500;MD15G1439400;MD15G1438800;MD15G1438400;MD15G1438300;MD15G1439800;MD15G1438100;MD15G1439600;MD15G1439200;MD15G1439900;MD15G1438900;MD15G1438200;MD15G1439300;MD15G1439700;MD15G1439500;MD15G1438700
935	MSTRG.120572.1	MD15G1115200;MD15G1114500;MD15G1115400;MD15G1115100;MD15G1114800;MD15G1113500;MD15G1115600;MD15G1113800;MD15G1115800;MD15G1114300;MD15G1114100;MD15G1114400;MD15G1114600;MD15G1113600;MD15G1113900;MD15G1113300;MD15G1115500;MD15G1113200;MD15G1114000;MD15G1114200;MD15G1115700;MD15G1113400;MD15G1114900;MD15G1115000;MD15G1113700;MD15G1114700
936	MSTRG.55835.13	MD07G1092900;MD07G1093700;MD07G1093200;MD07G1093400;MD07G1093100;MD07G1093000;MD07G1093800;MD07G1093600
937	MSTRG.93661.1	MD11G1260900;MD11G1261200;MD11G1261000;MD11G1261800;MD11G1262100;MD11G1261500;MD11G1261600;MD11G1261300;MD11G1261100;MD11G1261900;MD11G1261400;MD11G1262000;MD11G1260800
938	MSTRG.23059.27	MD03G1047600;MD03G1047400;MD03G1050500;MD03G1048600;MD03G1049200;MD03G1048900;MD03G1047200;MD03G1050200;MD03G1049600;MD03G1047800;MD03G1047700;MD03G1049300;MD03G1049100;MD03G1049800;MD03G1049700;MD03G1048000;MD03G1049000;MD03G1048400;MD03G1048500;MD03G1050000;MD03G1048200;MD03G1050400;MD03G1047300;MD03G1047900;MD03G1049900
939	MSTRG.142584.2	MD17G1152000;MD17G1152800;MD17G1151800;MD17G1152100;MD17G1152400
940	MSTRG.130976.6	MD16G1028700;MD16G1028800;MD16G1027300;MD16G1027700;MD16G1027400;MD16G1029000;MD16G1028400;MD16G1028100;MD16G1029100;MD16G1026800;MD16G1028200;MD16G1027900;MD16G1027100;MD16G1027800;MD16G1028600;MD16G1026700;MD16G1026600;MD16G1027500;MD16G1027200;MD16G1027000;MD16G1028300;MD16G1028500;MD16G1027600
941	MSTRG.48362.1	MD06G1051900;MD06G1051400;MD06G1051800;MD06G1051500
942	MSTRG.87323.122	MD11G1032300;MD11G1030500;MD11G1030800;MD11G1033000;MD11G1030300;MD11G1032200;MD11G1032400;MD11G1032100;MD11G1033100;MD11G1032700;MD11G1031000;MD11G1032900;MD11G1030900;MD11G1030400;MD11G1031900;MD11G1033200;MD11G1032600;MD11G1031100;MD11G1030700;MD11G1032000;MD11G1030600
943	MSTRG.109421.1	MD13G1255700;MD13G1256100;MD13G1256000;MD13G1255400;MD13G1255900
944	MSTRG.66832.1	MD08G1179700;MD08G1180200;MD08G1180300;MD08G1180000;MD08G1178900;MD08G1179900;MD08G1178800;MD08G1179400;MD08G1180100;MD08G1179000;MD08G1179200;MD08G1179500;MD08G1179600;MD08G1179100
945	MSTRG.3433.1	MD00G1101100;MD00G1101200;MD00G1100700;MD00G1101700;MD00G1100800;MD00G1100600;MD00G1101300;MD00G1101400;MD00G1101600;MD00G1101500
946	MSTRG.64280.23	MD08G1100300;MD08G1100800;MD08G1099200;MD08G1099600;MD08G1100200;MD08G1098800;MD08G1100100;MD08G1098900;MD08G1099700;MD08G1099300;MD08G1100500;MD08G1099400;MD08G1099900;MD08G1100900;MD08G1099500;MD08G1099100;MD08G1099800;MD08G1099000;MD08G1098600;MD08G1100400;MD08G1098500
947	MSTRG.142917.9	MD17G1161300;MD17G1161500;MD17G1162000;MD17G1161700;MD17G1161900;MD17G1161800;MD17G1162100;MD17G1162300;MD17G1162200;MD17G1161400
948	MSTRG.59047.48	MD07G1195500;MD07G1194600;MD07G1193800;MD07G1193900;MD07G1195600;MD07G1192500;MD07G1194300;MD07G1194100;MD07G1192800;MD07G1195800;MD07G1192900;MD07G1195100;MD07G1193600;MD07G1194200;MD07G1193500;MD07G1195700;MD07G1192600;MD07G1192700;MD07G1194900;MD07G1193300;MD07G1193200;MD07G1195300;MD07G1193700;MD07G1194000;MD07G1195400;MD07G1194800;MD07G1194400;MD07G1194500
949	MSTRG.88686.2	MD11G1097500;MD11G1098900;MD11G1098600;MD11G1098200;MD11G1097800;MD11G1097700;MD11G1098000;MD11G1097300;MD11G1099000;MD11G1097400;MD11G1097600;MD11G1097900;MD11G1098100;MD11G1099200;MD11G1099100;MD11G1097200;MD11G1098400;MD11G1098500
950	MSTRG.23766.3	MD03G1080500;MD03G1080900;MD03G1081700;MD03G1080800;MD03G1081500;MD03G1081000;MD03G1081800;MD03G1080200;MD03G1081300;MD03G1082100;MD03G1082500;MD03G1081600;MD03G1082400;MD03G1082000;MD03G1081900;MD03G1081100;MD03G1082200;MD03G1080700;MD03G1080600;MD03G1081200
951	MSTRG.146238.2	MD17G1268900;MD17G1269000;MD17G1269900;MD17G1269100;MD17G1269200;MD17G1269500;MD17G1269300;MD17G1269400;MD17G1269600
952	MSTRG.69961.1	MD09G1045400;MD09G1044000;MD09G1045200;MD09G1045000;MD09G1044100;MD09G1044300;MD09G1043900;MD09G1044500;MD09G1045500;MD09G1045300;MD09G1044400;MD09G1045100;MD09G1044700;MD09G1044200;MD09G1043800;MD09G1044600;MD09G1045600
953	MSTRG.51424.1	MD06G1150200;MD06G1149600;MD06G1150400;MD06G1149800;MD06G1150300;MD06G1149700;MD06G1150500;MD06G1149500;MD06G1150600
954	MSTRG.47600.2	MD06G1029200;MD06G1027500;MD06G1026900;MD06G1028400;MD06G1027900;MD06G1028500;MD06G1027400;MD06G1029100;MD06G1029000;MD06G1028900;MD06G1026800;MD06G1028600;MD06G1028800;MD06G1027100;MD06G1027200;MD06G1027800;MD06G1027300;MD06G1028700
955	MSTRG.28526.5	MD03G1236500;MD03G1235300;MD03G1237000;MD03G1237500;MD03G1235400;MD03G1235700;MD03G1236700;MD03G1235100;MD03G1235000;MD03G1237200;MD03G1236600;MD03G1234900;MD03G1237100;MD03G1235600;MD03G1235200;MD03G1236400;MD03G1235500;MD03G1236100;MD03G1236200;MD03G1237300;MD03G1236800
956	MSTRG.120089.8	MD15G1095200;MD15G1095800;MD15G1096000;MD15G1096400;MD15G1095400;MD15G1094100;MD15G1093800;MD15G1095000;MD15G1095300;MD15G1095500;MD15G1096200;MD15G1096100;MD15G1094800;MD15G1096300;MD15G1094700;MD15G1094300;MD15G1094900;MD15G1094000;MD15G1094200;MD15G1095700;MD15G1095900;MD15G1094600;MD15G1093900;MD15G1095600;MD15G1094500;MD15G1096500;MD15G1094400
957	MSTRG.69932.1	MD09G1043100;MD09G1043800;MD09G1042800;MD09G1043700;MD09G1044200;MD09G1042600;MD09G1044600;MD09G1044400;MD09G1044800;MD09G1043300;MD09G1042700;MD09G1042000;MD09G1044700;MD09G1042300;MD09G1042100;MD09G1044300;MD09G1043200;MD09G1042900;MD09G1044500;MD09G1042500;MD09G1044000;MD09G1042400;MD09G1044100;MD09G1043000;MD09G1042200
958	MSTRG.3126.1	MD00G1092300;MD00G1092900;MD00G1092100;MD00G1092800;MD00G1092400;MD00G1092500;MD00G1092600;MD00G1092000;MD00G1092700
959	MSTRG.12573.1	MD01G1184900;MD01G1183700;MD01G1184100;MD01G1184600;MD01G1184300;MD01G1183900;MD01G1183500;MD01G1184700;MD01G1183800;MD01G1183600;MD01G1184800;MD01G1183400;MD01G1184000;MD01G1184400;MD01G1184500
960	MSTRG.77131.2	MD10G1001800;MD10G1001500;MD10G1002000;MD10G1002300;MD10G1002200;MD10G1001700;MD10G1002500;MD10G1002100;MD10G1002400
961	MSTRG.56341.1	MD07G1111800;MD07G1111900;MD07G1111700;MD07G1112300;MD07G1112200
962	MSTRG.5479.5	MD00G1156600;MD00G1156000;MD00G1156400;MD00G1156200;MD00G1156500;MD00G1156300;MD00G1156100
963	MSTRG.77202.1	MD10G1005600;MD10G1005500;MD10G1005900;MD10G1004000;MD10G1003500;MD10G1004300;MD10G1004100;MD10G1004400;MD10G1005700;MD10G1005400;MD10G1005000;MD10G1003800;MD10G1003300;MD10G1005800;MD10G1003400;MD10G1005100;MD10G1004200;MD10G1003900;MD10G1005200
964	MSTRG.82329.1	MD10G1172000;MD10G1172800;MD10G1173100;MD10G1172700;MD10G1172100;MD10G1173000;MD10G1171700;MD10G1173200;MD10G1171900;MD10G1172900;MD10G1171500;MD10G1171600;MD10G1172400;MD10G1172600;MD10G1172200;MD10G1171200;MD10G1171800;MD10G1171300;MD10G1171400;MD10G1173400;MD10G1173300;MD10G1172500;MD10G1172300
965	MSTRG.8930.1	MD01G1040900;MD01G1040700;MD01G1041200;MD01G1041000;MD01G1041100;MD01G1040800
966	MSTRG.20320.1	MD02G1254200;MD02G1254900;MD02G1254000;MD02G1254600;MD02G1253900;MD02G1254100;MD02G1254300;MD02G1255400;MD02G1255200;MD02G1255000;MD02G1255300
967	MSTRG.83961.2	MD10G1234700;MD10G1234200;MD10G1233100;MD10G1233300;MD10G1232900;MD10G1233200;MD10G1233900;MD10G1234600;MD10G1233400;MD10G1234400;MD10G1232600;MD10G1234000;MD10G1233000;MD10G1234300;MD10G1233600;MD10G1234500;MD10G1234100;MD10G1232800;MD10G1232500;MD10G1233500;MD10G1232700;MD10G1233800
968	MSTRG.64447.1	MD08G1105200;MD08G1105600;MD08G1105500;MD08G1105300;MD08G1105000;MD08G1104900;MD08G1105100
969	MSTRG.91493.4	MD11G1192900;MD11G1193300;MD11G1192700;MD11G1193000;MD11G1193500;MD11G1193200;MD11G1193400;MD11G1193100
970	MSTRG.81856.5	MD10G1155700;MD10G1154600;MD10G1155200;MD10G1154300;MD10G1154500;MD10G1155800;MD10G1155500;MD10G1155000;MD10G1154400;MD10G1155400;MD10G1154200;MD10G1155100;MD10G1154900
971	MSTRG.82528.4	MD10G1180700;MD10G1178600;MD10G1179000;MD10G1180500;MD10G1179600;MD10G1180100;MD10G1179200;MD10G1181000;MD10G1179300;MD10G1180800;MD10G1179700;MD10G1179100;MD10G1180200;MD10G1178200;MD10G1178900;MD10G1180900;MD10G1180400;MD10G1179400;MD10G1178100;MD10G1178700;MD10G1179900;MD10G1178800;MD10G1178300;MD10G1180600;MD10G1180000;MD10G1180300
972	MSTRG.22693.17	MD03G1033000;MD03G1032100;MD03G1033500;MD03G1033300;MD03G1031200;MD03G1032600;MD03G1031500;MD03G1030900;MD03G1031700;MD03G1030800;MD03G1032300;MD03G1030700;MD03G1031400;MD03G1032200;MD03G1032800;MD03G1030600;MD03G1032900;MD03G1031300;MD03G1031600;MD03G1031900;MD03G1033100;MD03G1031800;MD03G1033200;MD03G1032000;MD03G1032500;MD03G1032700;MD03G1033400;MD03G1032400
973	MSTRG.124928.1	MD15G1275900;MD15G1274900;MD15G1276300;MD15G1274800;MD15G1276000;MD15G1275800;MD15G1275700;MD15G1276200;MD15G1275500;MD15G1275300;MD15G1275100;MD15G1274600;MD15G1275000;MD15G1275400;MD15G1276100
974	MSTRG.25541.1	MD03G1141100;MD03G1140700;MD03G1141600
975	MSTRG.87225.1	MD11G1026500;MD11G1027200;MD11G1026400;MD11G1026800;MD11G1026200;MD11G1026100;MD11G1026900;MD11G1027100;MD11G1027800;MD11G1025800;MD11G1027400;MD11G1025600;MD11G1027500;MD11G1026700;MD11G1027000;MD11G1027300;MD11G1026000;MD11G1027600;MD11G1025500;MD11G1027900;MD11G1025700;MD11G1026600;MD11G1027700;MD11G1028000
976	MSTRG.141006.1	MD17G1091000;MD17G1092000;MD17G1091200;MD17G1091100;MD17G1090900;MD17G1092400;MD17G1091800;MD17G1091300;MD17G1092300;MD17G1092200;MD17G1091400;MD17G1091900;MD17G1090800;MD17G1092100;MD17G1091700;MD17G1091600
977	MSTRG.11988.2	MD01G1156500;MD01G1156100;MD01G1156600;MD01G1156800;MD01G1156900;MD01G1155000;MD01G1155900;MD01G1154800;MD01G1155100;MD01G1154900;MD01G1157000;MD01G1156700;MD01G1156400;MD01G1155600;MD01G1154500;MD01G1157200;MD01G1154600;MD01G1156200;MD01G1156300;MD01G1157100;MD01G1155300;MD01G1155400;MD01G1155800;MD01G1154700
978	MSTRG.50231.6	MD06G1105400;MD06G1104500;MD06G1104700;MD06G1104600;MD06G1105600;MD06G1104800;MD06G1105500;MD06G1104300;MD06G1105300
979	MSTRG.67612.1	MD08G1203200;MD08G1202300;MD08G1201600;MD08G1202200;MD08G1202100;MD08G1202600;MD08G1201400;MD08G1201700;MD08G1202500;MD08G1202000;MD08G1202400;MD08G1201300;MD08G1202900;MD08G1203000;MD08G1202800;MD08G1202700;MD08G1201200;MD08G1203100
980	MSTRG.67727.9	MD08G1206900;MD08G1206600;MD08G1206800;MD08G1206700;MD08G1206300;MD08G1207000;MD08G1207100
981	MSTRG.145178.1	MD17G1233700;MD17G1233400;MD17G1232300;MD17G1233500;MD17G1233300;MD17G1233200;MD17G1233000;MD17G1232500;MD17G1232400;MD17G1233600;MD17G1233800;MD17G1232600;MD17G1232900;MD17G1232700;MD17G1232800
982	MSTRG.100260.1	MD12G1176300;MD12G1176500;MD12G1176700;MD12G1176400;MD12G1177200;MD12G1177900;MD12G1177700;MD12G1177800;MD12G1177300;MD12G1177600;MD12G1176800;MD12G1177000;MD12G1176900;MD12G1176600
983	MSTRG.121523.1	MD15G1151400;MD15G1149200;MD15G1150400;MD15G1147800;MD15G1151100;MD15G1150100;MD15G1149800;MD15G1147900;MD15G1149900;MD15G1149500;MD15G1149400;MD15G1148900;MD15G1148100;MD15G1148200;MD15G1148400;MD15G1150700;MD15G1148700;MD15G1150500;MD15G1149700;MD15G1149300;MD15G1149000;MD15G1150900;MD15G1151000;MD15G1149600;MD15G1148500;MD15G1150600;MD15G1148300;MD15G1151300;MD15G1150800;MD15G1150300;MD15G1151…
984	MSTRG.105894.6	MD13G1139100;MD13G1137200;MD13G1138900;MD13G1137100;MD13G1137700;MD13G1139300;MD13G1138200;MD13G1139200;MD13G1138600;MD13G1138700;MD13G1139000;MD13G1137400;MD13G1138100;MD13G1138000;MD13G1137800;MD13G1137900;MD13G1138800;MD13G1138500;MD13G1138400;MD13G1137300
985	MSTRG.129836.1	MD15G1431500;MD15G1430900;MD15G1430400;MD15G1431200;MD15G1430500;MD15G1431700;MD15G1431000;MD15G1431300;MD15G1430000;MD15G1429400;MD15G1430800;MD15G1431100;MD15G1430200;MD15G1430300;MD15G1430600;MD15G1431600;MD15G1431400;MD15G1429700;MD15G1430700;MD15G1429900;MD15G1429600;MD15G1429800;MD15G1429300;MD15G1429500
986	MSTRG.51051.2	MD06G1135500;MD06G1135700;MD06G1135100;MD06G1135200;MD06G1135000;MD06G1135800;MD06G1134700;MD06G1134800;MD06G1135400;MD06G1135600;MD06G1134500;MD06G1134600
987	MSTRG.5633.5	MD00G1160600;MD00G1160900;MD00G1160500;MD00G1160700;MD00G1160800;MD00G1160200;MD00G1161000;MD00G1160300;MD00G1160400;MD00G1161100
988	MSTRG.99890.1	MD12G1161400;MD12G1161000;MD12G1161300;MD12G1161100;MD12G1161200
989	MSTRG.112715.4	MD14G1067400;MD14G1066600;MD14G1067500;MD14G1067200;MD14G1067100;MD14G1066800;MD14G1066500;MD14G1066200;MD14G1066100;MD14G1066700;MD14G1067300;MD14G1066900;MD14G1066400;MD14G1066300
990	MSTRG.24097.1	MD03G1093300;MD03G1093600;MD03G1092900;MD03G1094600;MD03G1093100;MD03G1093400;MD03G1093000;MD03G1093500;MD03G1092800;MD03G1093800;MD03G1094500;MD03G1094200;MD03G1094000;MD03G1093900;MD03G1094400
991	MSTRG.100963.9	MD12G1199300;MD12G1201000;MD12G1199400;MD12G1200300;MD12G1199600;MD12G1201300;MD12G1199700;MD12G1199800;MD12G1200000;MD12G1201700;MD12G1200900;MD12G1200400;MD12G1201800;MD12G1200600;MD12G1200200;MD12G1201500;MD12G1201400;MD12G1200800;MD12G1199900;MD12G1201100;MD12G1200100;MD12G1199500;MD12G1201600;MD12G1201900;MD12G1200500
992	MSTRG.8010.1	MD01G1019100;MD01G1019600;MD01G1019000;MD01G1018800;MD01G1018700;MD01G1019500;MD01G1019300;MD01G1019200
993	MSTRG.30678.1	MD04G1020500;MD04G1019800;MD04G1019900;MD04G1020200;MD04G1020900;MD04G1021400;MD04G1020400;MD04G1020300;MD04G1021200;MD04G1021000;MD04G1021300;MD04G1021100;MD04G1020700;MD04G1020000;MD04G1020100;MD04G1020800
994	MSTRG.4727.1	MD00G1136100;MD00G1136700;MD00G1135800;MD00G1135900;MD00G1136500;MD00G1136400;MD00G1136000;MD00G1135600;MD00G1135700;MD00G1136300;MD00G1136200;MD00G1136800
995	MSTRG.121262.2	MD15G1139500;MD15G1139900;MD15G1140400;MD15G1140000;MD15G1139000;MD15G1138900;MD15G1138700;MD15G1139400;MD15G1140300;MD15G1138400;MD15G1138800;MD15G1139600;MD15G1139300;MD15G1138500;MD15G1140100;MD15G1140200;MD15G1139200;MD15G1139800
996	MSTRG.64633.2	MD08G1111700;MD08G1110200;MD08G1110300;MD08G1110100;MD08G1111100;MD08G1110700;MD08G1111300;MD08G1111600;MD08G1110600;MD08G1111200;MD08G1110000;MD08G1110400;MD08G1111000;MD08G1109900;MD08G1111500;MD08G1110500;MD08G1111400
997	MSTRG.14745.2	MD02G1039400;MD02G1039100;MD02G1038300;MD02G1039200;MD02G1038800;MD02G1038500;MD02G1038700;MD02G1039000;MD02G1039300;MD02G1039500;MD02G1038600;MD02G1038900;MD02G1038400
998	MSTRG.52649.2	MD06G1200600;MD06G1200000;MD06G1201500;MD06G1201200;MD06G1199400;MD06G1199300;MD06G1200700;MD06G1201100;MD06G1199600;MD06G1198900;MD06G1201300;MD06G1199700;MD06G1200900;MD06G1200500;MD06G1200300;MD06G1200100;MD06G1200400;MD06G1201000;MD06G1199000;MD06G1199500;MD06G1199100;MD06G1200200;MD06G1199800;MD06G1201400
999	MSTRG.96126.1	MD12G1040800;MD12G1040100;MD12G1040200;MD12G1040400;MD12G1040300;MD12G1040000;MD12G1040500;MD12G1040600;MD12G1040700
1000	MSTRG.44815.8	MD05G1278200;MD05G1277300;MD05G1277800;MD05G1278400;MD05G1277500;MD05G1277700;MD05G1278900;MD05G1277900;MD05G1279400;MD05G1278000;MD05G1278100;MD05G1279200;MD05G1278800;MD05G1279300;MD05G1278600;MD05G1278700;MD05G1277000;MD05G1277400;MD05G1277100;MD05G1277200;MD05G1278500
1001	MSTRG.43717.1	MD05G1233200;MD05G1234900;MD05G1234200;MD05G1234100;MD05G1233900;MD05G1235100;MD05G1233500;MD05G1235200;MD05G1234300;MD05G1233700;MD05G1235400;MD05G1235700;MD05G1235500;MD05G1234500;MD05G1233000;MD05G1233300;MD05G1233100;MD05G1232700;MD05G1235000;MD05G1232500;MD05G1234400;MD05G1233800;MD05G1234800;MD05G1233400;MD05G1235300;MD05G1234700;MD05G1232600;MD05G1233600;MD05G1234000;MD05G1232800;MD05G1235…
1002	MSTRG.55038.4	MD07G1064500;MD07G1063700;MD07G1063500;MD07G1064200;MD07G1062700;MD07G1063100;MD07G1062500;MD07G1063400;MD07G1063000;MD07G1064400;MD07G1064000;MD07G1063900;MD07G1062400;MD07G1064100;MD07G1063300;MD07G1063200;MD07G1064300;MD07G1062900;MD07G1062600;MD07G1063800;MD07G1063600;MD07G1062300
1003	MSTRG.45771.1	MD05G1319600;MD05G1320000;MD05G1320700;MD05G1320800;MD05G1319300;MD05G1320300;MD05G1319500;MD05G1320100;MD05G1321200;MD05G1319900;MD05G1319700;MD05G1319800;MD05G1321000;MD05G1321100;MD05G1319200;MD05G1321500;MD05G1320900;MD05G1320200;MD05G1320600;MD05G1319400;MD05G1320400;MD05G1320500;MD05G1321300
1004	MSTRG.108239.1	MD13G1216700;MD13G1216900;MD13G1216800;MD13G1217200;MD13G1216300;MD13G1216400;MD13G1216600;MD13G1216500
1005	MSTRG.146286.1	MD17G1270900;MD17G1271500;MD17G1270300;MD17G1271700;MD17G1271600;MD17G1270100;MD17G1271900;MD17G1270800;MD17G1272000;MD17G1271400;MD17G1270700;MD17G1270600;MD17G1271200;MD17G1271300;MD17G1270000;MD17G1271100;MD17G1271000
1006	MSTRG.13313.1	MD01G1217600;MD01G1217500;MD01G1217900;MD01G1218300;MD01G1216600;MD01G1216700;MD01G1218800;MD01G1217400;MD01G1218700;MD01G1216500;MD01G1218100;MD01G1218000;MD01G1217800;MD01G1217100;MD01G1217200;MD01G1218500;MD01G1218600;MD01G1217300;MD01G1216400;MD01G1217000;MD01G1216800;MD01G1216200;MD01G1218900;MD01G1216900
1007	MSTRG.2228.1	MD00G1068300;MD00G1068100;MD00G1068600;MD00G1068700;MD00G1068500
1008	MSTRG.49566.3	MD06G1084500;MD06G1084400
1009	MSTRG.121262.1	MD15G1140400;MD15G1138900;MD15G1140000;MD15G1139000;MD15G1139500;MD15G1139900;MD15G1138400;MD15G1140300;MD15G1139400;MD15G1138800;MD15G1138700;MD15G1138500;MD15G1140200;MD15G1140100;MD15G1139600;MD15G1139300;MD15G1139800;MD15G1139200
1010	MSTRG.375.1	MD00G1011600;MD00G1011300;MD00G1011100;MD00G1011400;MD00G1011000;MD00G1012400;MD00G1011700;MD00G1012300;MD00G1012200;MD00G1011500;MD00G1012000;MD00G1011200;MD00G1011900;MD00G1012100;MD00G1010800
1011	MSTRG.14972.42	MD02G1050300;MD02G1048300;MD02G1048100;MD02G1048200;MD02G1049400;MD02G1047700;MD02G1049900;MD02G1049500;MD02G1048600;MD02G1049700;MD02G1049300;MD02G1048800;MD02G1048000;MD02G1048700;MD02G1049800;MD02G1050100;MD02G1049000;MD02G1048900;MD02G1047800;MD02G1047300;MD02G1047900;MD02G1049600;MD02G1050000;MD02G1047500;MD02G1050200;MD02G1047600;MD02G1047200;MD02G1048400
1012	MSTRG.13488.4	MD01G1224300;MD01G1222600;MD01G1224900;MD01G1224100;MD01G1223100;MD01G1221900;MD01G1224600;MD01G1223200;MD01G1223700;MD01G1225000;MD01G1222500;MD01G1222000;MD01G1223500;MD01G1224500;MD01G1222700;MD01G1225400;MD01G1222800;MD01G1223600;MD01G1224700;MD01G1222100;MD01G1222400;MD01G1222200;MD01G1224000;MD01G1222900;MD01G1224400;MD01G1223300;MD01G1223400;MD01G1224800;MD01G1223900;MD01G1225300
1013	MSTRG.38677.1	MD05G1053300;MD05G1053500;MD05G1052400;MD05G1053900;MD05G1052900;MD05G1053100;MD05G1052800;MD05G1054300;MD05G1053000;MD05G1053400;MD05G1053700;MD05G1052500;MD05G1053600;MD05G1054100;MD05G1054200;MD05G1054000;MD05G1053800;MD05G1053200
1014	MSTRG.89880.1	MD11G1148900;MD11G1148500;MD11G1149500;MD11G1148600;MD11G1149300;MD11G1149200;MD11G1149600;MD11G1149000;MD11G1148800;MD11G1149400;MD11G1148300;MD11G1149100
1015	MSTRG.24209.1	MD03G1098400;MD03G1097200;MD03G1097000;MD03G1098100;MD03G1096600;MD03G1096800;MD03G1097800;MD03G1097600;MD03G1097100;MD03G1096900;MD03G1096500;MD03G1097900;MD03G1098300;MD03G1098200;MD03G1096700;MD03G1098000;MD03G1097700
1016	MSTRG.113041.9	MD14G1078600;MD14G1078700;MD14G1077900;MD14G1078500;MD14G1077800;MD14G1078300;MD14G1077700;MD14G1078200;MD14G1078100;MD14G1078400
1017	MSTRG.74716.1	MD09G1219300;MD09G1219100;MD09G1219200
1018	MSTRG.37965.1	MD05G1030500;MD05G1031200;MD05G1030400;MD05G1030800;MD05G1030700;MD05G1031100;MD05G1030300;MD05G1030600;MD05G1030200
1019	MSTRG.102172.1	MD12G1255500;MD12G1255700;MD12G1253400;MD12G1254700;MD12G1255800;MD12G1254000;MD12G1254300;MD12G1255400;MD12G1253300;MD12G1255000;MD12G1256000;MD12G1253100;MD12G1256200;MD12G1255200;MD12G1254900;MD12G1255900;MD12G1253500;MD12G1253600;MD12G1253700;MD12G1253800;MD12G1256100;MD12G1253200;MD12G1255100;MD12G1253900;MD12G1254600;MD12G1255600;MD12G1254500;MD12G1254800;MD12G1255300;MD12G1254400
1020	MSTRG.65678.1	MD08G1146100;MD08G1146600;MD08G1146300;MD08G1146500;MD08G1146200;MD08G1146400
1021	MSTRG.69551.1	MD09G1023400;MD09G1025600;MD09G1025000;MD09G1025400;MD09G1023000;MD09G1023800;MD09G1022800;MD09G1025200;MD09G1025700;MD09G1024900;MD09G1024600;MD09G1023500;MD09G1025100;MD09G1024100;MD09G1024800;MD09G1025500;MD09G1022900;MD09G1024000;MD09G1025300;MD09G1023200;MD09G1023300;MD09G1023600
1022	MSTRG.127560.5	MD15G1354700;MD15G1354200;MD15G1354500;MD15G1354300;MD15G1354400
1023	MSTRG.67789.1	MD08G1207200;MD08G1207300;MD08G1208100;MD08G1207400;MD08G1208200;MD08G1208600;MD08G1208000;MD08G1208400;MD08G1208500;MD08G1208300
1024	MSTRG.122697.15	MD15G1194500;MD15G1193700;MD15G1195100;MD15G1193800;MD15G1194000;MD15G1194400;MD15G1193900;MD15G1193600;MD15G1195000;MD15G1194600;MD15G1194300
1025	MSTRG.30723.1	MD04G1021200;MD04G1021000;MD04G1021100;MD04G1021300;MD04G1022200;MD04G1021600;MD04G1022700;MD04G1023200;MD04G1021900;MD04G1020700;MD04G1020800;MD04G1022900;MD04G1023100;MD04G1023000;MD04G1022500;MD04G1022000;MD04G1021700;MD04G1021800;MD04G1021500;MD04G1022600;MD04G1021400;MD04G1022400;MD04G1022300;MD04G1020900;MD04G1022100
1026	MSTRG.15521.1	MD02G1077700;MD02G1076900;MD02G1077500;MD02G1076700;MD02G1077000;MD02G1078600;MD02G1077600;MD02G1076600;MD02G1076500;MD02G1077900;MD02G1078400;MD02G1077300;MD02G1079400;MD02G1078500;MD02G1079300;MD02G1079500;MD02G1077800;MD02G1076800;MD02G1078700;MD02G1079200;MD02G1077200;MD02G1077400
1027	MSTRG.93151.1	MD11G1245500;MD11G1246100;MD11G1245300;MD11G1246300;MD11G1245600;MD11G1245200;MD11G1245700;MD11G1245000;MD11G1246000;MD11G1245100;MD11G1245400;MD11G1246200
1028	MSTRG.114787.1	MD14G1129700;MD14G1129500;MD14G1130600;MD14G1130300;MD14G1129800;MD14G1130200;MD14G1130700;MD14G1131300;MD14G1130400;MD14G1131100;MD14G1129900;MD14G1130800;MD14G1129300;MD14G1129600;MD14G1129400;MD14G1131000;MD14G1130500
1029	MSTRG.103253.12	MD13G1036800;MD13G1035300;MD13G1035900;MD13G1037200;MD13G1037000;MD13G1037400;MD13G1038200;MD13G1034100;MD13G1034300;MD13G1035200;MD13G1037500;MD13G1038000;MD13G1035700;MD13G1036500;MD13G1036600;MD13G1034500;MD13G1034400;MD13G1035400;MD13G1034600;MD13G1035600;MD13G1035800;MD13G1036700;MD13G1034700;MD13G1037100;MD13G1036100;MD13G1036300;MD13G1036200;MD13G1034900;MD13G1037800;MD13G1034200;MD13G1035…
1030	MSTRG.36245.2	MD04G1217500;MD04G1219400;MD04G1217800;MD04G1218300;MD04G1218200;MD04G1219200;MD04G1219600;MD04G1217700;MD04G1220000;MD04G1220300;MD04G1220700;MD04G1218000;MD04G1220100;MD04G1219700;MD04G1220600;MD04G1219800;MD04G1219900;MD04G1220200;MD04G1217900;MD04G1217600;MD04G1219000;MD04G1220800;MD04G1220500;MD04G1220400;MD04G1217400;MD04G1219300;MD04G1217300
1031	MSTRG.36356.4	MD04G1224400;MD04G1222300;MD04G1221500;MD04G1222800;MD04G1223000;MD04G1224700;MD04G1224600;MD04G1222500;MD04G1222000;MD04G1222400;MD04G1224000;MD04G1223200;MD04G1223500;MD04G1224300;MD04G1224200;MD04G1224500;MD04G1224800;MD04G1221700;MD04G1223900;MD04G1223300;MD04G1223600;MD04G1223800;MD04G1221600;MD04G1222200;MD04G1222600;MD04G1221900;MD04G1223400;MD04G1224100;MD04G1224900;MD04G1222100;MD04G1222…
1032	MSTRG.34904.1	MD04G1165700;MD04G1164500;MD04G1166500;MD04G1166400;MD04G1165900;MD04G1166200;MD04G1166300;MD04G1164200;MD04G1164600;MD04G1164300;MD04G1165800;MD04G1165600;MD04G1166000;MD04G1165000;MD04G1165100;MD04G1164700;MD04G1165300;MD04G1166800;MD04G1166600;MD04G1165500;MD04G1165400;MD04G1166700;MD04G1166100;MD04G1164400
1033	MSTRG.29394.1	MD03G1271700;MD03G1272300;MD03G1269700;MD03G1269900;MD03G1268900;MD03G1269400;MD03G1268800;MD03G1269500;MD03G1271200;MD03G1271800;MD03G1271300;MD03G1270200;MD03G1271500;MD03G1271100;MD03G1270400;MD03G1269600;MD03G1269800;MD03G1271900;MD03G1272000;MD03G1270700;MD03G1271600;MD03G1270300;MD03G1272200;MD03G1271400;MD03G1269000;MD03G1270100;MD03G1270500
1034	MSTRG.93575.2	MD11G1259100;MD11G1259200;MD11G1259600;MD11G1260100;MD11G1259000;MD11G1260200;MD11G1259900;MD11G1259400;MD11G1259700;MD11G1259300;MD11G1259500;MD11G1260000;MD11G1260300
1035	MSTRG.7031.1	MD00G1203300;MD00G1203100;MD00G1203200
1036	MSTRG.6710.1	MD00G1189600;MD00G1189500
1037	MSTRG.55149.1	MD07G1068800;MD07G1069700;MD07G1069800;MD07G1068700;MD07G1069500;MD07G1069000;MD07G1068300;MD07G1068100;MD07G1068900;MD07G1068500;MD07G1068000;MD07G1069300;MD07G1068200;MD07G1069600;MD07G1068400
1038	MSTRG.120454.1	MD15G1109500;MD15G1111000;MD15G1111500;MD15G1110900;MD15G1110600;MD15G1110400;MD15G1110000;MD15G1109600;MD15G1110300;MD15G1109400;MD15G1109800;MD15G1110100;MD15G1109900;MD15G1111300;MD15G1109300;MD15G1111100;MD15G1109700;MD15G1110500;MD15G1110800;MD15G1110200
1039	MSTRG.31663.3	MD04G1056000;MD04G1056500;MD04G1056400;MD04G1056800;MD04G1055800;MD04G1056600;MD04G1056900;MD04G1056100;MD04G1057000;MD04G1056200
1040	MSTRG.125349.1	MD15G1290400;MD15G1288600;MD15G1290700;MD15G1289300;MD15G1289000;MD15G1288800;MD15G1289500;MD15G1290600;MD15G1289600;MD15G1289200;MD15G1289700;MD15G1288900;MD15G1290500;MD15G1290300;MD15G1289400;MD15G1288700;MD15G1289100;MD15G1290900
1041	MSTRG.123833.12	MD15G1235000;MD15G1235700;MD15G1236900;MD15G1235500;MD15G1236700;MD15G1236600;MD15G1235900;MD15G1235300;MD15G1235200;MD15G1237000;MD15G1236100;MD15G1236400;MD15G1236300;MD15G1235400;MD15G1237100;MD15G1236800;MD15G1235100;MD15G1235600;MD15G1236500;MD15G1236000;MD15G1236200
1042	MSTRG.113102.1	MD14G1080500;MD14G1080200;MD14G1080000;MD14G1080700;MD14G1080800;MD14G1080400;MD14G1080100;MD14G1080600;MD14G1080300;MD14G1079900;MD14G1079800;MD14G1080900;MD14G1079700
1043	MSTRG.18763.1	MD02G1198200;MD02G1198100;MD02G1198300;MD02G1198400
1044	MSTRG.139871.3	MD17G1047200;MD17G1047100;MD17G1045600;MD17G1046000;MD17G1046500;MD17G1045500;MD17G1047500;MD17G1046100;MD17G1045700;MD17G1045400;MD17G1047300;MD17G1046700;MD17G1046600;MD17G1046800;MD17G1047000;MD17G1046400;MD17G1046200;MD17G1046300;MD17G1047400
1045	MSTRG.12957.1	MD01G1202200;MD01G1200300;MD01G1202100;MD01G1201400;MD01G1201600;MD01G1202300;MD01G1200900;MD01G1202800;MD01G1201500;MD01G1201900;MD01G1202900;MD01G1201700;MD01G1200200;MD01G1201300;MD01G1200600;MD01G1202600;MD01G1203000;MD01G1200500;MD01G1201200;MD01G1201000;MD01G1202700;MD01G1200700;MD01G1201100;MD01G1200800;MD01G1200400;MD01G1201800
1046	MSTRG.82091.2	MD10G1163500;MD10G1162100;MD10G1162300;MD10G1162500;MD10G1163400;MD10G1162000;MD10G1161900;MD10G1163000;MD10G1162400;MD10G1162800;MD10G1163600;MD10G1162200;MD10G1163800;MD10G1162700;MD10G1163700
1047	MSTRG.112050.4	MD14G1042600;MD14G1044400;MD14G1044500;MD14G1042500;MD14G1043000;MD14G1043400;MD14G1043900;MD14G1043300;MD14G1043200;MD14G1044100;MD14G1044700;MD14G1043500;MD14G1044300;MD14G1042900;MD14G1043800;MD14G1043600;MD14G1044000;MD14G1043700
1048	MSTRG.11953.5	MD01G1154200;MD01G1155000;MD01G1154800;MD01G1155600;MD01G1154000;MD01G1154400;MD01G1155100;MD01G1154900;MD01G1155300;MD01G1153700;MD01G1154100;MD01G1154600;MD01G1154500;MD01G1154700;MD01G1154300;MD01G1153900;MD01G1155400;MD01G1153600;MD01G1153400;MD01G1153500
1049	MSTRG.140158.2	MD17G1056900;MD17G1057000;MD17G1057500;MD17G1057400;MD17G1057100;MD17G1057600;MD17G1056800;MD17G1057300
1050	MSTRG.74525.1	MD09G1215500;MD09G1215200;MD09G1215000;MD09G1214600;MD09G1214900;MD09G1215100;MD09G1215300
1051	MSTRG.42210.1	MD05G1177100;MD05G1176600;MD05G1176800;MD05G1177400;MD05G1178000;MD05G1176500;MD05G1178400;MD05G1176700;MD05G1176900;MD05G1177500;MD05G1178700;MD05G1178300;MD05G1178100;MD05G1177600;MD05G1177200;MD05G1176400;MD05G1178600;MD05G1177700;MD05G1178500;MD05G1177000;MD05G1176100
1052	MSTRG.101202.1	MD12G1211100;MD12G1210200;MD12G1211300;MD12G1210700;MD12G1210900;MD12G1211200;MD12G1209700;MD12G1211000;MD12G1210300;MD12G1209300;MD12G1210100;MD12G1210800;MD12G1210000;MD12G1211400;MD12G1209900;MD12G1209400;MD12G1209600;MD12G1209200;MD12G1209800;MD12G1210600;MD12G1209500
1053	MSTRG.44385.10	MD05G1260200;MD05G1259900;MD05G1261800;MD05G1262700;MD05G1262300;MD05G1262600;MD05G1260300;MD05G1260000;MD05G1262100;MD05G1259300;MD05G1260500;MD05G1260100;MD05G1259800;MD05G1261500;MD05G1260400;MD05G1259200;MD05G1262400;MD05G1259100;MD05G1259600;MD05G1262000;MD05G1259400;MD05G1262200;MD05G1259500;MD05G1261900;MD05G1262500
1054	MSTRG.59648.1	MD07G1216800;MD07G1216900;MD07G1216500;MD07G1217000;MD07G1217700;MD07G1217100;MD07G1217800;MD07G1217200;MD07G1216300;MD07G1216600;MD07G1217900
1055	MSTRG.88686.8	MD11G1098000;MD11G1097300;MD11G1097500;MD11G1098600;MD11G1098900;MD11G1097800;MD11G1098200;MD11G1097700;MD11G1097400;MD11G1097600;MD11G1097900;MD11G1099100;MD11G1099200;MD11G1098100;MD11G1098500;MD11G1097200;MD11G1098400;MD11G1099000
1056	MSTRG.35457.13	MD04G1184400;MD04G1185000;MD04G1185800;MD04G1185100;MD04G1184700;MD04G1184000;MD04G1184100;MD04G1186200;MD04G1185700;MD04G1184500;MD04G1184300;MD04G1185600;MD04G1186000;MD04G1184800;MD04G1184900;MD04G1186300;MD04G1186100;MD04G1185900;MD04G1184600
1057	MSTRG.17268.1	MD02G1153200;MD02G1153400;MD02G1152200;MD02G1152000;MD02G1153500;MD02G1152400;MD02G1153100;MD02G1152600;MD02G1151900;MD02G1152500;MD02G1153000;MD02G1153300
1058	MSTRG.78594.1	MD10G1057600;MD10G1056700;MD10G1057100;MD10G1057400;MD10G1057000;MD10G1056800;MD10G1057800;MD10G1056600;MD10G1056100;MD10G1056500;MD10G1056900;MD10G1056400;MD10G1057200;MD10G1058000;MD10G1057300;MD10G1057700;MD10G1057900;MD10G1056300;MD10G1056000;MD10G1056200;MD10G1058100
1059	MSTRG.56130.1	MD07G1105500;MD07G1105300;MD07G1104800;MD07G1104600;MD07G1104500;MD07G1105600;MD07G1104400;MD07G1105900;MD07G1105400;MD07G1104700;MD07G1104900
1060	MSTRG.134534.4	MD16G1164200;MD16G1164800;MD16G1163900;MD16G1164600;MD16G1164500;MD16G1165000;MD16G1164000;MD16G1163800;MD16G1164900;MD16G1164300;MD16G1164100;MD16G1165100;MD16G1164700
1061	MSTRG.59121.2	MD07G1198400;MD07G1197000;MD07G1196500;MD07G1198100;MD07G1197200;MD07G1197300;MD07G1196400;MD07G1196600;MD07G1196800;MD07G1197600;MD07G1196200;MD07G1197900;MD07G1198300;MD07G1196900;MD07G1197800;MD07G1197700;MD07G1196100;MD07G1196700;MD07G1198000;MD07G1196300;MD07G1197500
1062	MSTRG.8648.2	MD01G1035000;MD01G1035100;MD01G1035300;MD01G1035200;MD01G1034900
1063	MSTRG.122667.4	MD15G1193700;MD15G1192900;MD15G1192700;MD15G1193500;MD15G1192100;MD15G1192400;MD15G1193100;MD15G1193600;MD15G1192200;MD15G1193400;MD15G1193800;MD15G1192500;MD15G1192300;MD15G1193000;MD15G1192600;MD15G1192000;MD15G1192800
1064	MSTRG.74192.3	MD09G1205200;MD09G1205300;MD09G1204400;MD09G1205500;MD09G1204700;MD09G1204500;MD09G1205400;MD09G1204600
1065	MSTRG.96727.4	MD12G1061300;MD12G1060000;MD12G1060300;MD12G1060800;MD12G1060900;MD12G1060100;MD12G1061100;MD12G1060400;MD12G1061400;MD12G1060600;MD12G1061000;MD12G1060500;MD12G1060200;MD12G1061200
1066	MSTRG.29050.1	MD03G1256000;MD03G1255900;MD03G1256100;MD03G1255400;MD03G1256300;MD03G1256400;MD03G1255600;MD03G1256500;MD03G1255700;MD03G1255300;MD03G1255800;MD03G1255200;MD03G1256200;MD03G1255500
1067	MSTRG.88784.1	MD11G1103900;MD11G1102600;MD11G1103200;MD11G1103300;MD11G1104200;MD11G1104100;MD11G1103000;MD11G1102800;MD11G1103700;MD11G1103800;MD11G1102700;MD11G1103600;MD11G1103100;MD11G1103400;MD11G1103500;MD11G1104000
1068	MSTRG.33618.2	MD04G1116400;MD04G1116300;MD04G1113800;MD04G1114100;MD04G1113400;MD04G1113900;MD04G1116200
1069	MSTRG.51049.1	MD06G1135600;MD06G1134500;MD06G1134600;MD06G1134700;MD06G1134800;MD06G1135400;MD06G1135000;MD06G1135200;MD06G1135100;MD06G1135700;MD06G1134300;MD06G1135500
1070	MSTRG.86315.16	MD10G1331900;MD10G1331600;MD10G1329900;MD10G1329100;MD10G1328900;MD10G1330300;MD10G1329500;MD10G1330800;MD10G1329300;MD10G1331700;MD10G1329400;MD10G1331100;MD10G1332100;MD10G1331200;MD10G1330900;MD10G1330100;MD10G1331500;MD10G1331800;MD10G1329200;MD10G1329000;MD10G1329600;MD10G1331000;MD10G1328600;MD10G1331400;MD10G1329800;MD10G1330600;MD10G1332200;MD10G1330400;MD10G1329700;MD10G1328800;MD10G1330…
1071	MSTRG.24104.1	MD03G1094400;MD03G1093900;MD03G1094000;MD03G1094200;MD03G1093800;MD03G1094500;MD03G1093500;MD03G1093400;MD03G1094600;MD03G1093300;MD03G1093600
1072	MSTRG.17013.1	MD02G1143000;MD02G1142700;MD02G1141800;MD02G1141500;MD02G1141200;MD02G1141700;MD02G1142900;MD02G1142200;MD02G1142600;MD02G1142400;MD02G1142300;MD02G1141300;MD02G1141600;MD02G1143400;MD02G1141400;MD02G1143600;MD02G1142800;MD02G1143700;MD02G1143200;MD02G1143500
1073	MSTRG.43777.1	MD05G1235100;MD05G1237300;MD05G1235300;MD05G1235200;MD05G1236200;MD05G1236000;MD05G1236800;MD05G1236400;MD05G1236900;MD05G1236300;MD05G1237000;MD05G1237400;MD05G1238000;MD05G1237500;MD05G1237600;MD05G1235800;MD05G1237200;MD05G1235900;MD05G1236700;MD05G1236500;MD05G1236100;MD05G1237700;MD05G1235700;MD05G1235400;MD05G1236600;MD05G1235500;MD05G1237800;MD05G1238100
1074	MSTRG.69546.4	MD09G1026900;MD09G1022600;MD09G1027400;MD09G1022900;MD09G1027200;MD09G1024000;MD09G1027300;MD09G1023600;MD09G1023300;MD09G1026400;MD09G1023200;MD09G1026700;MD09G1026800;MD09G1023500;MD09G1027100;MD09G1027800;MD09G1022700;MD09G1022400;MD09G1026100;MD09G1027000;MD09G1026500;MD09G1027900;MD09G1026300;MD09G1023400;MD09G1027500;MD09G1023000;MD09G1027600;MD09G1022800;MD09G1023800;MD09G1026600;MD09G1026…
1075	MSTRG.41814.1	MD05G1161400;MD05G1161600;MD05G1161800;MD05G1161000;MD05G1161100;MD05G1160700;MD05G1161300;MD05G1160300;MD05G1160200;MD05G1160500;MD05G1160400;MD05G1161500;MD05G1160100;MD05G1161700;MD05G1160900;MD05G1161200
1076	MSTRG.111587.1	MD14G1025700;MD14G1026100;MD14G1025400;MD14G1024500;MD14G1026300;MD14G1024600;MD14G1025500;MD14G1026400;MD14G1025300;MD14G1025000;MD14G1026000;MD14G1025900;MD14G1025800;MD14G1024900;MD14G1026200;MD14G1025100;MD14G1025200;MD14G1024700;MD14G1025600
1077	MSTRG.47300.2	MD06G1015400;MD06G1016500;MD06G1016600;MD06G1015900;MD06G1015700;MD06G1017200;MD06G1015500;MD06G1016200;MD06G1015200;MD06G1016700;MD06G1017100;MD06G1015300;MD06G1016900;MD06G1017300;MD06G1016400;MD06G1017000;MD06G1016800;MD06G1016300;MD06G1016000;MD06G1015600;MD06G1017400
1078	MSTRG.46345.2	MD05G1348300;MD05G1348200;MD05G1345900;MD05G1345700;MD05G1346700;MD05G1345500;MD05G1348000;MD05G1348500;MD05G1347900;MD05G1347200;MD05G1346100;MD05G1346400;MD05G1345800;MD05G1346900;MD05G1346600;MD05G1346000;MD05G1347700;MD05G1347100;MD05G1347500;MD05G1346500;MD05G1347400;MD05G1348900;MD05G1346200;MD05G1346800;MD05G1347600;MD05G1349100;MD05G1345600;MD05G1346300;MD05G1348800;MD05G1348100;MD05G1347…
1079	MSTRG.34692.4	MD04G1155600;MD04G1158900;MD04G1156300;MD04G1158700;MD04G1155700;MD04G1158500;MD04G1158200;MD04G1155900;MD04G1158000;MD04G1155500;MD04G1158600;MD04G1157800;MD04G1157700;MD04G1155800;MD04G1158300;MD04G1156200;MD04G1156000;MD04G1155400
1080	MSTRG.99342.3	MD12G1140400;MD12G1140600;MD12G1140800;MD12G1139600;MD12G1139500;MD12G1140200;MD12G1139400;MD12G1139800;MD12G1140300;MD12G1139700;MD12G1140500;MD12G1139300;MD12G1140900
1081	MSTRG.138935.1	MD17G1002600;MD17G1000600;MD17G1002300;MD17G1002400;MD17G1001600;MD17G1000700;MD17G1000500;MD17G1002200;MD17G1001500;MD17G1001000;MD17G1001400;MD17G1000400;MD17G1000900;MD17G1002700;MD17G1001300;MD17G1001200;MD17G1002500;MD17G1001800;MD17G1002800;MD17G1002000;MD17G1001900;MD17G1001700;MD17G1001100;MD17G1002100;MD17G1002900;MD17G1000300
1082	MSTRG.37053.1	MD05G1002600;MD05G1002300;MD05G1003100;MD05G1003200;MD05G1002800;MD05G1003000;MD05G1002400;MD05G1002700;MD05G1002100;MD05G1002900;MD05G1002500;MD05G1002200;MD05G1003400;MD05G1003300
1083	MSTRG.98343.4	MD12G1110400;MD12G1110500;MD12G1110900;MD12G1111100;MD12G1110600;MD12G1111000;MD12G1110300;MD12G1110700
1084	MSTRG.10177.1	MD01G1084800;MD01G1085500;MD01G1085900;MD01G1086200;MD01G1085700;MD01G1085200;MD01G1085400;MD01G1085600;MD01G1085300;MD01G1085000;MD01G1084900;MD01G1085800
1085	MSTRG.125307.1	MD15G1288500;MD15G1288100;MD15G1288400;MD15G1288200;MD15G1288000;MD15G1288300
1086	MSTRG.51661.14	MD06G1162500;MD06G1163900;MD06G1162800;MD06G1163300;MD06G1163700;MD06G1164500;MD06G1163100;MD06G1164400;MD06G1162700;MD06G1162400;MD06G1164600;MD06G1164300;MD06G1163800;MD06G1163400;MD06G1164100;MD06G1163000;MD06G1162900;MD06G1163500;MD06G1162600;MD06G1164200;MD06G1164000;MD06G1163600
1087	MSTRG.83917.9	MD10G1232000;MD10G1233400;MD10G1232200;MD10G1232600;MD10G1233000;MD10G1231600;MD10G1231100;MD10G1231400;MD10G1231900;MD10G1233100;MD10G1232900;MD10G1233300;MD10G1233200;MD10G1232700;MD10G1232100;MD10G1231200;MD10G1233500;MD10G1230700;MD10G1231500;MD10G1231300;MD10G1231800;MD10G1233600;MD10G1231700;MD10G1230900;MD10G1232800;MD10G1232500;MD10G1230800
1088	MSTRG.1615.1	MD00G1049800;MD00G1050100
1089	MSTRG.20277.1	MD02G1252000;MD02G1250600;MD02G1250900;MD02G1250700;MD02G1250400;MD02G1252200;MD02G1252500;MD02G1250500;MD02G1252300;MD02G1252400;MD02G1252600;MD02G1250800
1090	MSTRG.34669.1	MD04G1156600;MD04G1156200;MD04G1156000;MD04G1155900;MD04G1155400;MD04G1154900;MD04G1155800;MD04G1154500;MD04G1155700;MD04G1154600;MD04G1155500;MD04G1156400;MD04G1156300
1091	MSTRG.129863.1	MD15G1432200;MD15G1431600;MD15G1430600;MD15G1431400;MD15G1432300;MD15G1430700;MD15G1430300;MD15G1431100;MD15G1430200;MD15G1430800;MD15G1431300;MD15G1432400;MD15G1431200;MD15G1431000;MD15G1431700;MD15G1430500;MD15G1431500;MD15G1430900;MD15G1430400
1092	MSTRG.913.3	MD00G1030300;MD00G1030400;MD00G1028900;MD00G1030000;MD00G1029300;MD00G1029200;MD00G1029100;MD00G1029000;MD00G1029400;MD00G1029500
1093	MSTRG.21025.2	MD02G1278200;MD02G1278500;MD02G1278600;MD02G1279000;MD02G1278900;MD02G1278300;MD02G1279300;MD02G1278000;MD02G1278100;MD02G1279200;MD02G1278800;MD02G1278700;MD02G1278400;MD02G1279100
1094	MSTRG.96546.1	MD12G1055900;MD12G1055700;MD12G1054700;MD12G1055300;MD12G1054800;MD12G1054600;MD12G1054400;MD12G1055400;MD12G1055800;MD12G1055200;MD12G1056000;MD12G1055000;MD12G1054500;MD12G1055100
1095	MSTRG.126194.2	MD15G1315400;MD15G1315500;MD15G1315600;MD15G1315800;MD15G1316100
1096	MSTRG.33853.1	MD04G1124900;MD04G1124700;MD04G1125600;MD04G1124800;MD04G1125500;MD04G1124300;MD04G1125400;MD04G1125200;MD04G1124500;MD04G1124100;MD04G1124400;MD04G1125700;MD04G1125300;MD04G1124200
1097	MSTRG.36246.15	MD04G1219700;MD04G1220100;MD04G1218000;MD04G1220300;MD04G1220000;MD04G1217700;MD04G1219600;MD04G1219200;MD04G1218300;MD04G1217200;MD04G1217800;MD04G1219400;MD04G1217500;MD04G1217300;MD04G1219300;MD04G1217400;MD04G1220500;MD04G1220400;MD04G1217000;MD04G1217600;MD04G1219000;MD04G1219900;MD04G1220200;MD04G1217900;MD04G1219800;MD04G1217100;MD04G1218500
1098	MSTRG.94976.1	MD11G1316300;MD11G1316400;MD11G1317200;MD11G1316500;MD11G1317400;MD11G1315900;MD11G1315800;MD11G1317800;MD11G1315500;MD11G1316100;MD11G1316900;MD11G1316200;MD11G1317100;MD11G1317300;MD11G1316600;MD11G1315700;MD11G1315600;MD11G1317900;MD11G1316800;MD11G1317000;MD11G1315400
1099	MSTRG.99188.1	MD12G1134700;MD12G1134300;MD12G1134600;MD12G1135200;MD12G1134200;MD12G1135300;MD12G1134800;MD12G1134500;MD12G1134900;MD12G1135000;MD12G1134400
1100	MSTRG.57586.1	MD07G1147100;MD07G1147400;MD07G1147300;MD07G1147000;MD07G1147600;MD07G1147500;MD07G1147200;MD07G1147700;MD07G1146900
1101	MSTRG.64633.1	MD08G1111600;MD08G1111800;MD08G1111400;MD08G1110700;MD08G1111500;MD08G1110500;MD08G1110100;MD08G1109900;MD08G1110400;MD08G1110300;MD08G1110000;MD08G1110200;MD08G1110600;MD08G1111700
1102	MSTRG.104651.1	MD13G1094200;MD13G1093100;MD13G1094800;MD13G1094400;MD13G1093800;MD13G1092400;MD13G1094300;MD13G1093700;MD13G1092700;MD13G1095000;MD13G1094500;MD13G1094000;MD13G1092300;MD13G1093600;MD13G1093300;MD13G1094700;MD13G1092100;MD13G1092600;MD13G1092200;MD13G1092500;MD13G1093900;MD13G1094900;MD13G1092900;MD13G1092800;MD13G1094100;MD13G1093200;MD13G1093000;MD13G1094600
1103	MSTRG.8100.2	MD01G1021800;MD01G1021900;MD01G1021700
1104	MSTRG.26920.1	MD03G1180600;MD03G1183100;MD03G1181200;MD03G1181300;MD03G1182900;MD03G1180500;MD03G1182400;MD03G1181000;MD03G1181100;MD03G1180700;MD03G1180900;MD03G1182700;MD03G1180800;MD03G1182600;MD03G1180400;MD03G1182500;MD03G1183000;MD03G1182800
1105	MSTRG.62724.1	MD08G1036700;MD08G1037100;MD08G1037200;MD08G1038400;MD08G1038600;MD08G1037300;MD08G1038500;MD08G1036300;MD08G1037600;MD08G1037500;MD08G1038000;MD08G1038200;MD08G1037400;MD08G1037800;MD08G1037700;MD08G1038300;MD08G1036600;MD08G1038100;MD08G1039000;MD08G1036800;MD08G1036400;MD08G1036500;MD08G1038900
1106	MSTRG.41365.8	MD05G1136400;MD05G1136900;MD05G1137000;MD05G1137400;MD05G1136300;MD05G1136000;MD05G1137100;MD05G1136500;MD05G1136700;MD05G1135700;MD05G1136100;MD05G1136200;MD05G1135900;MD05G1135800;MD05G1137300
1107	MSTRG.39419.1	MD05G1073100;MD05G1073800;MD05G1073200;MD05G1073900;MD05G1074000;MD05G1074200;MD05G1073700;MD05G1073400;MD05G1074100;MD05G1073000;MD05G1073600;MD05G1073300
1108	MSTRG.129242.6	MD15G1404700;MD15G1406000;MD15G1404800;MD15G1404500;MD15G1405000;MD15G1404300;MD15G1406700;MD15G1404100;MD15G1405100;MD15G1405500;MD15G1404900;MD15G1406600;MD15G1405800;MD15G1404600;MD15G1404200;MD15G1406500;MD15G1405700;MD15G1405900;MD15G1405200;MD15G1405300;MD15G1404400;MD15G1405400
1109	MSTRG.131008.4	MD16G1029500;MD16G1029400;MD16G1028700;MD16G1029600;MD16G1029200;MD16G1028800;MD16G1028000;MD16G1029700;MD16G1029100;MD16G1028100;MD16G1029000;MD16G1028400;MD16G1029900;MD16G1029300;MD16G1028200;MD16G1027900;MD16G1028500;MD16G1029800;MD16G1028300;MD16G1028600;MD16G1027800
1110	MSTRG.73950.1	MD09G1199400;MD09G1198500;MD09G1199500;MD09G1199100;MD09G1198800;MD09G1199200;MD09G1198400;MD09G1199000;MD09G1198300;MD09G1198600;MD09G1198700;MD09G1199300
1111	MSTRG.25703.2	MD03G1146000;MD03G1145900;MD03G1145800
1112	MSTRG.83925.7	MD10G1233100;MD10G1231900;MD10G1231400;MD10G1233300;MD10G1232900;MD10G1233200;MD10G1232000;MD10G1233400;MD10G1232600;MD10G1232200;MD10G1233000;MD10G1231600;MD10G1231700;MD10G1233600;MD10G1231300;MD10G1231800;MD10G1232800;MD10G1232500;MD10G1232400;MD10G1231200;MD10G1232100;MD10G1233500;MD10G1232700;MD10G1231500;MD10G1232300
1113	MSTRG.113400.16	MD14G1087500;MD14G1087800;MD14G1087700;MD14G1087100
1114	MSTRG.113400.13	MD14G1087800;MD14G1087100;MD14G1087700;MD14G1087500
1115	MSTRG.47966.7	MD06G1039400;MD06G1038400;MD06G1038600;MD06G1038800;MD06G1038500;MD06G1039100;MD06G1038900;MD06G1039300;MD06G1038700;MD06G1039000;MD06G1038300
1116	MSTRG.85933.1	MD10G1311500;MD10G1312200;MD10G1312300;MD10G1311000;MD10G1310700;MD10G1312700;MD10G1311400;MD10G1311300;MD10G1312000;MD10G1312500;MD10G1311700;MD10G1310600;MD10G1311600;MD10G1311100;MD10G1312100;MD10G1310900;MD10G1311900;MD10G1312400;MD10G1311800;MD10G1311200;MD10G1310800
1117	MSTRG.43824.1	MD05G1238000;MD05G1239200;MD05G1239500;MD05G1238500;MD05G1238700;MD05G1239000;MD05G1239400;MD05G1238200;MD05G1238300;MD05G1238100;MD05G1240400;MD05G1239100;MD05G1238600;MD05G1238900;MD05G1238800;MD05G1240300;MD05G1239800;MD05G1240000;MD05G1239900;MD05G1239600;MD05G1240100;MD05G1238400;MD05G1239300
1118	MSTRG.73165.2	MD09G1173400;MD09G1174400;MD09G1173300;MD09G1173800;MD09G1174700;MD09G1174900;MD09G1173700;MD09G1174800;MD09G1174600;MD09G1173200;MD09G1173500;MD09G1175000;MD09G1173600;MD09G1174100;MD09G1174500;MD09G1174000
1119	MSTRG.5521.7	MD00G1157300;MD00G1157000;MD00G1157200;MD00G1157400;MD00G1158000;MD00G1156900;MD00G1157500;MD00G1157700
1120	MSTRG.70504.1	MD09G1067900;MD09G1067300;MD09G1067200;MD09G1067800;MD09G1067100;MD09G1067700;MD09G1068400;MD09G1067000;MD09G1066900;MD09G1069300;MD09G1068000;MD09G1068100;MD09G1068500;MD09G1066800;MD09G1067500;MD09G1068700;MD09G1068800;MD09G1068200;MD09G1068300;MD09G1067600;MD09G1068600
1121	MSTRG.56206.22	MD07G1108500;MD07G1108400;MD07G1108800;MD07G1108000;MD07G1108700;MD07G1108200;MD07G1108600;MD07G1108900;MD07G1108300
1122	MSTRG.12567.2	MD01G1183700;MD01G1184100;MD01G1183100;MD01G1184300;MD01G1183300;MD01G1183400;MD01G1184000;MD01G1183200;MD01G1184400;MD01G1184500;MD01G1183900;MD01G1183500;MD01G1183800;MD01G1183600
1123	MSTRG.23379.3	MD03G1062600;MD03G1062100;MD03G1062400;MD03G1064200;MD03G1064800;MD03G1062000;MD03G1065100;MD03G1064500;MD03G1062500;MD03G1063700;MD03G1062200;MD03G1064000;MD03G1065000;MD03G1064400;MD03G1063900;MD03G1062900;MD03G1064100;MD03G1063600;MD03G1062700;MD03G1063300;MD03G1063500;MD03G1062300;MD03G1063100
1124	MSTRG.64896.23	MD08G1120400;MD08G1121300;MD08G1120800;MD08G1119900;MD08G1121500;MD08G1119700;MD08G1120300;MD08G1120600;MD08G1120100;MD08G1120200;MD08G1120700;MD08G1119800;MD08G1119600;MD08G1121000;MD08G1121400;MD08G1120500
1125	MSTRG.57550.9	MD07G1145900;MD07G1146100;MD07G1146500;MD07G1146000;MD07G1146700;MD07G1146200;MD07G1146300;MD07G1146800;MD07G1146600
1126	MSTRG.76486.1	MD09G1273700;MD09G1272700;MD09G1273400;MD09G1273600;MD09G1272800;MD09G1272600;MD09G1272100;MD09G1272500;MD09G1272400;MD09G1273300;MD09G1273500;MD09G1273200
1127	MSTRG.137257.4	MD16G1249400;MD16G1249500;MD16G1249300;MD16G1249700;MD16G1249600;MD16G1249800;MD16G1249900;MD16G1250000;MD16G1250100
1128	MSTRG.66553.51	MD08G1171700;MD08G1170500;MD08G1170300;MD08G1171400;MD08G1171800
1129	MSTRG.115793.1	MD14G1164800;MD14G1163700;MD14G1164400;MD14G1163800;MD14G1164900;MD14G1162800;MD14G1163000;MD14G1163200;MD14G1165100;MD14G1164600;MD14G1163600;MD14G1163900;MD14G1164300;MD14G1162900;MD14G1163300;MD14G1164500;MD14G1162600;MD14G1163400;MD14G1162700;MD14G1163500;MD14G1164200;MD14G1165000;MD14G1163100;MD14G1164700;MD14G1164000
1130	MSTRG.41579.1	MD05G1148800;MD05G1149400;MD05G1148900;MD05G1148100;MD05G1148200;MD05G1149300;MD05G1148300;MD05G1149700;MD05G1149500;MD05G1149000;MD05G1149100;MD05G1149200;MD05G1148600;MD05G1148500;MD05G1149600;MD05G1148000
1131	MSTRG.54472.1	MD07G1038500;MD07G1038600;MD07G1039100;MD07G1038400;MD07G1038300;MD07G1038800;MD07G1038000;MD07G1039200;MD07G1039000;MD07G1038100;MD07G1038200;MD07G1038900
1132	MSTRG.58857.15	MD07G1184900;MD07G1186400;MD07G1186500;MD07G1186100;MD07G1186200;MD07G1185300;MD07G1185000;MD07G1185400;MD07G1186300;MD07G1186600;MD07G1185500;MD07G1186000;MD07G1185800;MD07G1185600;MD07G1184700;MD07G1185900;MD07G1184800
1133	MSTRG.106053.7	MD13G1144300;MD13G1144200;MD13G1144600;MD13G1145900;MD13G1144500;MD13G1145000;MD13G1145500;MD13G1145600;MD13G1145800;MD13G1144800;MD13G1145100;MD13G1145200;MD13G1144900;MD13G1144700;MD13G1146000
1134	MSTRG.36730.1	MD04G1237900;MD04G1237000;MD04G1237800;MD04G1237200;MD04G1236200;MD04G1237400;MD04G1238100;MD04G1236400;MD04G1236700;MD04G1236800;MD04G1237500;MD04G1238000;MD04G1237100;MD04G1238400;MD04G1236600;MD04G1236100;MD04G1237700;MD04G1238200;MD04G1237600;MD04G1238600;MD04G1236900;MD04G1236500;MD04G1238500;MD04G1238300;MD04G1237300;MD04G1236300
1135	MSTRG.35074.1	MD04G1171400;MD04G1170900;MD04G1171800;MD04G1171900;MD04G1171300;MD04G1172000;MD04G1171500;MD04G1170700;MD04G1171600;MD04G1170800;MD04G1171700
1136	MSTRG.84422.1	MD10G1254900;MD10G1254100;MD10G1255500;MD10G1254600;MD10G1253900;MD10G1255000;MD10G1254300;MD10G1254000;MD10G1254200;MD10G1254800;MD10G1255100;MD10G1255300;MD10G1254500
1137	MSTRG.125325.6	MD15G1288500;MD15G1288700;MD15G1288100;MD15G1289200;MD15G1288400;MD15G1289100;MD15G1288200;MD15G1288300;MD15G1288600;MD15G1288900;MD15G1289000;MD15G1288800
1138	MSTRG.80776.2	MD10G1117600;MD10G1116500;MD10G1116900;MD10G1116600;MD10G1117700;MD10G1117300;MD10G1117000;MD10G1117200;MD10G1117900;MD10G1117500;MD10G1116800;MD10G1116400;MD10G1117400
1139	MSTRG.74880.1	MD09G1221800;MD09G1222000;MD09G1221700;MD09G1221900
1140	MSTRG.40552.1	MD05G1110000;MD05G1109900;MD05G1110100;MD05G1109700;MD05G1110300;MD05G1109800;MD05G1110200
1141	MSTRG.16995.1	MD02G1140100;MD02G1142300;MD02G1139800;MD02G1139900;MD02G1141100;MD02G1142800;MD02G1141300;MD02G1140000;MD02G1140700;MD02G1143000;MD02G1140900;MD02G1140800;MD02G1142700;MD02G1141800;MD02G1140600;MD02G1142900;MD02G1141700;MD02G1141000;MD02G1141200;MD02G1140200;MD02G1142600;MD02G1142400;MD02G1142200
1142	MSTRG.102080.2	MD12G1251100;MD12G1250800;MD12G1250500;MD12G1251600;MD12G1250700;MD12G1250900;MD12G1251800;MD12G1250300;MD12G1250600;MD12G1251700;MD12G1251200;MD12G1251300;MD12G1251500;MD12G1250100;MD12G1251000;MD12G1251400;MD12G1251900
1143	MSTRG.54877.121	MD07G1057300;MD07G1056000;MD07G1056900;MD07G1056600;MD07G1056400;MD07G1057200;MD07G1056500;MD07G1055800;MD07G1056800;MD07G1057000;MD07G1055700;MD07G1055900;MD07G1057100;MD07G1056200;MD07G1055600;MD07G1056300
1144	MSTRG.15304.10	MD02G1066000;MD02G1065800;MD02G1065700;MD02G1066500;MD02G1065600;MD02G1066200;MD02G1066600;MD02G1067100;MD02G1065400;MD02G1066400;MD02G1067000;MD02G1065900;MD02G1065500;MD02G1066300;MD02G1066100;MD02G1066700;MD02G1066900
1145	MSTRG.137956.24	MD16G1265900;MD16G1266000;MD16G1266400;MD16G1266300;MD16G1266100;MD16G1265500;MD16G1266200
1146	MSTRG.128368.1	MD15G1379000;MD15G1379300;MD15G1378800;MD15G1378900
1147	MSTRG.23441.1	MD03G1067100;MD03G1067800;MD03G1067600;MD03G1067300;MD03G1065600;MD03G1066500;MD03G1066200;MD03G1067000;MD03G1066400;MD03G1067900;MD03G1066000;MD03G1068000;MD03G1066300;MD03G1066900;MD03G1066600;MD03G1067400;MD03G1067200;MD03G1066700;MD03G1067700;MD03G1065900;MD03G1067500
1148	MSTRG.55733.13	MD07G1090900;MD07G1091100;MD07G1090800;MD07G1090200;MD07G1090400;MD07G1090300;MD07G1090700;MD07G1090600;MD07G1091000
1149	MSTRG.125945.1	MD15G1307200;MD15G1307500;MD15G1307800;MD15G1307700;MD15G1307400;MD15G1307600
1150	MSTRG.14972.56	MD02G1047500;MD02G1050000;MD02G1047300;MD02G1047800;MD02G1047900;MD02G1049600;MD02G1048400;MD02G1050200;MD02G1047600;MD02G1047200;MD02G1048000;MD02G1048700;MD02G1049800;MD02G1049300;MD02G1049700;MD02G1048800;MD02G1048900;MD02G1049000;MD02G1050100;MD02G1048200;MD02G1049400;MD02G1048600;MD02G1047700;MD02G1049500;MD02G1049900;MD02G1050300;MD02G1048300;MD02G1048100
1151	MSTRG.40764.1	MD05G1116600;MD05G1116800;MD05G1115600;MD05G1115300;MD05G1117300;MD05G1117200;MD05G1115400;MD05G1116200;MD05G1116400;MD05G1115500;MD05G1116000;MD05G1117400;MD05G1117000;MD05G1115800;MD05G1116500;MD05G1115700;MD05G1116900;MD05G1117100;MD05G1116700
1152	MSTRG.58637.1	MD07G1177900;MD07G1179400;MD07G1179000;MD07G1177600;MD07G1178400;MD07G1178100;MD07G1178700;MD07G1179100;MD07G1178200;MD07G1178500;MD07G1177700;MD07G1179200;MD07G1178800;MD07G1178300;MD07G1179600;MD07G1178900;MD07G1178600;MD07G1179700;MD07G1179300
1153	MSTRG.9086.1	MD01G1045200;MD01G1045300;MD01G1045900;MD01G1046000;MD01G1045500;MD01G1045800;MD01G1045600;MD01G1045700;MD01G1046100
1154	MSTRG.88755.1	MD11G1100400;MD11G1100300;MD11G1101400;MD11G1100700;MD11G1101700;MD11G1100000;MD11G1100800;MD11G1100100;MD11G1101300;MD11G1102000;MD11G1101800;MD11G1101600;MD11G1100500;MD11G1100200;MD11G1101900;MD11G1100600;MD11G1101200
1155	MSTRG.144120.1	MD17G1197100;MD17G1197400;MD17G1197700;MD17G1197800;MD17G1197300;MD17G1197500;MD17G1196600;MD17G1196900;MD17G1196800;MD17G1197600
1156	MSTRG.6732.10	MD00G1189900;MD00G1190000;MD00G1190500;MD00G1190200
1157	MSTRG.28445.1	MD03G1233500;MD03G1233800;MD03G1233600;MD03G1232900;MD03G1233300;MD03G1232800;MD03G1234200;MD03G1233700;MD03G1233100;MD03G1233900;MD03G1234000;MD03G1234100;MD03G1233000;MD03G1233400;MD03G1233200
1158	MSTRG.91175.5	MD11G1185300;MD11G1185500;MD11G1185400
1159	MSTRG.87560.68	MD11G1044000;MD11G1043800;MD11G1045900;MD11G1044600;MD11G1044400;MD11G1045000;MD11G1045400;MD11G1044700;MD11G1043900;MD11G1044100;MD11G1045800;MD11G1044500;MD11G1045700;MD11G1043700;MD11G1046000;MD11G1045600;MD11G1044800;MD11G1045100;MD11G1045500;MD11G1045300
1160	MSTRG.114396.1	MD14G1115900;MD14G1115800;MD14G1115500;MD14G1115700;MD14G1116400;MD14G1115400;MD14G1116100;MD14G1115300;MD14G1116300;MD14G1115200;MD14G1116000;MD14G1116200
1161	MSTRG.43799.3	MD05G1237600;MD05G1237200;MD05G1238400;MD05G1239300;MD05G1239100;MD05G1237800;MD05G1238100;MD05G1238600;MD05G1238800;MD05G1238900;MD05G1237700;MD05G1239000;MD05G1238700;MD05G1239400;MD05G1238200;MD05G1238300;MD05G1237300;MD05G1237400;MD05G1238000;MD05G1237500;MD05G1239200;MD05G1239500;MD05G1238500
1162	MSTRG.41053.1	MD05G1125300;MD05G1126000;MD05G1126100;MD05G1125100;MD05G1125600;MD05G1125900;MD05G1125700;MD05G1125200;MD05G1125400
1163	MSTRG.46305.1	MD05G1344300;MD05G1343600;MD05G1343900;MD05G1343500;MD05G1345600;MD05G1344200;MD05G1345200;MD05G1344700;MD05G1344100;MD05G1343800;MD05G1345800;MD05G1345300;MD05G1343700;MD05G1345500;MD05G1345400;MD05G1345900;MD05G1345700;MD05G1344400;MD05G1344800;MD05G1344500;MD05G1344000;MD05G1345000;MD05G1344900;MD05G1345100
1164	MSTRG.66617.1	MD08G1173100;MD08G1172500;MD08G1173200;MD08G1173000;MD08G1173300;MD08G1172600
1165	MSTRG.86997.8	MD11G1017500;MD11G1016100;MD11G1015800;MD11G1016000;MD11G1016200;MD11G1018200;MD11G1017800;MD11G1018000;MD11G1017300;MD11G1016600;MD11G1018100;MD11G1015700;MD11G1016700;MD11G1016300;MD11G1016400;MD11G1017900;MD11G1017200;MD11G1017600;MD11G1017400;MD11G1015600;MD11G1017100;MD11G1016800;MD11G1015900
1166	MSTRG.65421.3	MD08G1136800;MD08G1136600;MD08G1137200;MD08G1137600;MD08G1136500;MD08G1137300;MD08G1136400;MD08G1137000;MD08G1137400;MD08G1137500;MD08G1136900;MD08G1136700
1167	MSTRG.77263.1	MD10G1007200;MD10G1006400;MD10G1006500;MD10G1006800;MD10G1007300;MD10G1006700;MD10G1006600;MD10G1006300;MD10G1006900
1168	MSTRG.62148.1	MD08G1013400;MD08G1011000;MD08G1012000;MD08G1013100;MD08G1011200;MD08G1011600;MD08G1013600;MD08G1012800;MD08G1013200;MD08G1013300;MD08G1012700;MD08G1012300;MD08G1013000;MD08G1011400;MD08G1011700;MD08G1011300;MD08G1013500;MD08G1012900;MD08G1011800;MD08G1011100;MD08G1011900
1169	MSTRG.76209.3	MD09G1262600;MD09G1261800;MD09G1261700;MD09G1261600;MD09G1262100;MD09G1261400;MD09G1262900;MD09G1263000;MD09G1262800;MD09G1261500;MD09G1262300;MD09G1262400;MD09G1262200;MD09G1262700;MD09G1262000;MD09G1261900
1170	MSTRG.14167.2	MD02G1010500;MD02G1010600;MD02G1013600;MD02G1012700;MD02G1011600;MD02G1011500;MD02G1010800;MD02G1011400;MD02G1012900;MD02G1011700;MD02G1012000;MD02G1010900;MD02G1011100;MD02G1011900;MD02G1011300;MD02G1011000;MD02G1012600;MD02G1013500;MD02G1010400;MD02G1013400;MD02G1013700;MD02G1013200;MD02G1013000;MD02G1012300;MD02G1012400;MD02G1012500;MD02G1012800;MD02G1011200;MD02G1012200;MD02G1010700;MD02G1013…
1171	MSTRG.50417.1	MD06G1111900;MD06G1112700;MD06G1113000;MD06G1112100;MD06G1111600;MD06G1113800;MD06G1112000;MD06G1113100;MD06G1112400;MD06G1112300;MD06G1112200;MD06G1111700;MD06G1113500;MD06G1112600;MD06G1113700;MD06G1112500;MD06G1111400;MD06G1113200;MD06G1113900;MD06G1113400;MD06G1111500;MD06G1111800
1172	MSTRG.104337.1	MD13G1082600;MD13G1079800;MD13G1080600;MD13G1080800;MD13G1082500;MD13G1082800;MD13G1082300;MD13G1082400;MD13G1081500;MD13G1079700;MD13G1082000;MD13G1080300;MD13G1082900;MD13G1081900;MD13G1081600;MD13G1080400;MD13G1081300;MD13G1080100;MD13G1081700;MD13G1081100;MD13G1079900;MD13G1081200;MD13G1080000;MD13G1081000;MD13G1082200;MD13G1081800;MD13G1080700;MD13G1079600;MD13G1082700;MD13G1080500;MD13G1082…
1173	MSTRG.126184.2	MD15G1315500;MD15G1315600;MD15G1315400;MD15G1315800;MD15G1315300
1174	MSTRG.55733.9	MD07G1090900;MD07G1091100;MD07G1090800;MD07G1090200;MD07G1090400;MD07G1090300;MD07G1090700;MD07G1091000;MD07G1090600
1175	MSTRG.15216.26	MD02G1064300;MD02G1063300;MD02G1063500;MD02G1064700;MD02G1063200;MD02G1064000;MD02G1063800;MD02G1064200;MD02G1064100;MD02G1063100;MD02G1064500;MD02G1064400;MD02G1063400;MD02G1063600
1176	MSTRG.56206.23	MD07G1108200;MD07G1108900;MD07G1108300;MD07G1108600;MD07G1108800;MD07G1108000;MD07G1108400;MD07G1108500;MD07G1108700
1177	MSTRG.38802.1	MD05G1057500;MD05G1058500;MD05G1058700;MD05G1057000;MD05G1057600;MD05G1058400;MD05G1058600;MD05G1057700;MD05G1058300;MD05G1057800;MD05G1058200;MD05G1058100
1178	MSTRG.105877.1	MD13G1136900;MD13G1136700;MD13G1136500;MD13G1137700;MD13G1137100;MD13G1137000;MD13G1136300;MD13G1138300;MD13G1137200;MD13G1137800;MD13G1136400;MD13G1137900;MD13G1136800;MD13G1136200;MD13G1136100;MD13G1138400;MD13G1137300;MD13G1138200;MD13G1137400;MD13G1138100;MD13G1136600;MD13G1138000
1179	MSTRG.23322.1	MD03G1059500;MD03G1060700;MD03G1059700;MD03G1059900;MD03G1060200;MD03G1060900;MD03G1060300;MD03G1061200;MD03G1061300;MD03G1061000;MD03G1059400;MD03G1060100;MD03G1059600;MD03G1060600;MD03G1061100;MD03G1060500;MD03G1060400;MD03G1059800;MD03G1061600;MD03G1061400
1180	MSTRG.46313.1	MD05G1345200;MD05G1346300;MD05G1345600;MD05G1346600;MD05G1346000;MD05G1345300;MD05G1346100;MD05G1345800;MD05G1346400;MD05G1346200;MD05G1344700;MD05G1345400;MD05G1345500;MD05G1346500;MD05G1345100;MD05G1344900;MD05G1344500;MD05G1345000;MD05G1345900;MD05G1344400;MD05G1345700;MD05G1344800
1181	MSTRG.37832.1	MD05G1027200;MD05G1026900;MD05G1026700;MD05G1027000;MD05G1027300;MD05G1026800;MD05G1027100
1182	MSTRG.106543.1	MD13G1164800;MD13G1164700;MD13G1164200;MD13G1164500;MD13G1165100;MD13G1165000;MD13G1164600;MD13G1164900;MD13G1164000;MD13G1164300;MD13G1163900;MD13G1163800;MD13G1164100;MD13G1163700
1183	MSTRG.110054.1	MD13G1268800;MD13G1268300;MD13G1268400;MD13G1268100;MD13G1268200
1184	MSTRG.89856.3	MD11G1148300;MD11G1147600;MD11G1147700;MD11G1148800;MD11G1147500;MD11G1148100;MD11G1148600;MD11G1148200;MD11G1148500;MD11G1147800;MD11G1148000
1185	MSTRG.141904.1	MD17G1127800;MD17G1126100;MD17G1126000;MD17G1126600;MD17G1126300;MD17G1126400;MD17G1127000;MD17G1125900;MD17G1127100;MD17G1127400;MD17G1126500;MD17G1126700;MD17G1127500;MD17G1126200;MD17G1127700;MD17G1126900;MD17G1127200;MD17G1126800;MD17G1127600
1186	MSTRG.44610.55	MD05G1268000;MD05G1268400;MD05G1268700;MD05G1268600;MD05G1267900;MD05G1268500;MD05G1269000;MD05G1269700;MD05G1269100;MD05G1270000;MD05G1269300;MD05G1268900;MD05G1268100;MD05G1269800;MD05G1268800;MD05G1269400;MD05G1268200;MD05G1269600;MD05G1269500;MD05G1269200;MD05G1269900
1187	MSTRG.55962.1	MD07G1097400;MD07G1097200;MD07G1097300;MD07G1097800;MD07G1097900;MD07G1098000;MD07G1096900;MD07G1097500;MD07G1097000;MD07G1096800;MD07G1097600;MD07G1096700;MD07G1097100;MD07G1097700
1188	MSTRG.44373.13	MD05G1258700;MD05G1260000;MD05G1259300;MD05G1260800;MD05G1260900;MD05G1258800;MD05G1261100;MD05G1260500;MD05G1259900;MD05G1260200;MD05G1260300;MD05G1259500;MD05G1258300;MD05G1260600;MD05G1258900;MD05G1258600;MD05G1259800;MD05G1259200;MD05G1260400;MD05G1259100;MD05G1259600;MD05G1261000;MD05G1260700;MD05G1259400;MD05G1258400
1189	MSTRG.19618.1	MD02G1226200;MD02G1225800;MD02G1225500;MD02G1226000;MD02G1226100;MD02G1226300
1190	MSTRG.26200.2	MD03G1159800;MD03G1160000;MD03G1160200;MD03G1159600;MD03G1160100;MD03G1160300;MD03G1159700;MD03G1159900
1191	MSTRG.20260.1	MD02G1249700;MD02G1249200;MD02G1249500;MD02G1249900;MD02G1250000;MD02G1249300;MD02G1250300;MD02G1249400;MD02G1250200;MD02G1249600;MD02G1249800
1192	MSTRG.61340.3	MD07G1291200;MD07G1291500;MD07G1291600;MD07G1291300;MD07G1291700;MD07G1291900;MD07G1291000;MD07G1290700;MD07G1291100;MD07G1291800;MD07G1291400
1193	MSTRG.20385.1	MD02G1256500;MD02G1256100;MD02G1256300;MD02G1256200;MD02G1256000;MD02G1256400;MD02G1256900;MD02G1257100;MD02G1256600;MD02G1257000;MD02G1257200;MD02G1257300;MD02G1255900
1194	MSTRG.126097.2	MD15G1312900;MD15G1312300;MD15G1312200;MD15G1313200;MD15G1313100;MD15G1313000;MD15G1312500;MD15G1312800;MD15G1312400;MD15G1312600
1195	MSTRG.61425.3	MD07G1294700;MD07G1295900;MD07G1294000;MD07G1294900;MD07G1293900;MD07G1295700;MD07G1295600;MD07G1294400;MD07G1295200;MD07G1293400;MD07G1295100;MD07G1296000;MD07G1294300;MD07G1293600;MD07G1293300;MD07G1294800;MD07G1294100;MD07G1295400;MD07G1293800;MD07G1296200;MD07G1295500;MD07G1296300;MD07G1295300;MD07G1293700;MD07G1294200;MD07G1293500;MD07G1295800;MD07G1296100
1196	MSTRG.86784.1	MD11G1005300;MD11G1006200;MD11G1005500;MD11G1006500;MD11G1004900;MD11G1006900;MD11G1006100;MD11G1006700;MD11G1005800;MD11G1005200;MD11G1006800;MD11G1005400;MD11G1006000;MD11G1007000;MD11G1005100;MD11G1006400;MD11G1006600;MD11G1005600;MD11G1006300;MD11G1005700
1197	MSTRG.52114.56	MD06G1180400;MD06G1180800;MD06G1179500;MD06G1180500;MD06G1180900;MD06G1179400;MD06G1178500;MD06G1179600;MD06G1179200;MD06G1180200;MD06G1179000;MD06G1180000;MD06G1179100;MD06G1178800;MD06G1178700;MD06G1179700;MD06G1178600;MD06G1178900;MD06G1179800;MD06G1180600;MD06G1180700;MD06G1179300;MD06G1180300
1198	MSTRG.22445.29	MD03G1019400;MD03G1018600;MD03G1018400;MD03G1020100;MD03G1019200;MD03G1018700;MD03G1018500;MD03G1018100;MD03G1019600;MD03G1020200;MD03G1018900;MD03G1019700;MD03G1019300;MD03G1018300;MD03G1019500;MD03G1018000;MD03G1019000;MD03G1017700;MD03G1018800;MD03G1019800;MD03G1020400;MD03G1019900;MD03G1020000;MD03G1020300;MD03G1018200;MD03G1017800
1199	MSTRG.84454.18	MD10G1257300;MD10G1257800;MD10G1257600;MD10G1256000;MD10G1256800;MD10G1256300;MD10G1256200;MD10G1255900;MD10G1257900;MD10G1256700;MD10G1256400;MD10G1257700;MD10G1256100;MD10G1257500;MD10G1258100;MD10G1258200;MD10G1256600;MD10G1256900;MD10G1257000;MD10G1255800;MD10G1258000
1200	MSTRG.133038.3	MD16G1110700;MD16G1111400;MD16G1110200;MD16G1113000;MD16G1110300;MD16G1110800;MD16G1113100;MD16G1112000;MD16G1112200;MD16G1112100;MD16G1111300;MD16G1113300;MD16G1111100;MD16G1111800;MD16G1111700;MD16G1111000;MD16G1112800;MD16G1112400;MD16G1110400;MD16G1111200;MD16G1112600;MD16G1112700;MD16G1112300;MD16G1113200;MD16G1110600;MD16G1111900;MD16G1111500;MD16G1112900;MD16G1110100;MD16G1110500;MD16G1111…
1201	MSTRG.89833.1	MD11G1146900;MD11G1147100;MD11G1147500;MD11G1147600;MD11G1147700;MD11G1147400;MD11G1147800;MD11G1148000;MD11G1147300;MD11G1148200;MD11G1148100;MD11G1147200;MD11G1147000
1202	MSTRG.81856.2	MD10G1155100;MD10G1154900;MD10G1155400;MD10G1154200;MD10G1154400;MD10G1155000;MD10G1155500;MD10G1155800;MD10G1155200;MD10G1154500;MD10G1154300;MD10G1154600;MD10G1155700
1203	MSTRG.133116.1	MD16G1115000;MD16G1114400;MD16G1113800;MD16G1114900;MD16G1114600;MD16G1114300;MD16G1114800
1204	MSTRG.32475.5	MD04G1082900;MD04G1082700
1205	MSTRG.81674.18	MD10G1149900;MD10G1148400;MD10G1147300;MD10G1149000;MD10G1147400;MD10G1149700;MD10G1147500;MD10G1147800;MD10G1148100;MD10G1149300;MD10G1149100;MD10G1147900;MD10G1148000;MD10G1148800;MD10G1149500;MD10G1148900;MD10G1148200;MD10G1149400;MD10G1149200;MD10G1148300;MD10G1148500;MD10G1149600;MD10G1149800
1206	MSTRG.77381.2	MD10G1012900;MD10G1013000;MD10G1012600;MD10G1012300;MD10G1012800;MD10G1012000;MD10G1012200;MD10G1012100;MD10G1012400;MD10G1013200;MD10G1011900;MD10G1012500;MD10G1012700;MD10G1013100
1207	MSTRG.32772.1	MD04G1088100;MD04G1088400
1208	MSTRG.109616.7	MD13G1258700;MD13G1258800
1209	MSTRG.5128.8	MD00G1146900;MD00G1147700;MD00G1147100;MD00G1147300;MD00G1147000;MD00G1147200;MD00G1147600;MD00G1147800
1210	MSTRG.5104.1	MD00G1146900;MD00G1146200;MD00G1147000;MD00G1146600;MD00G1146800;MD00G1145700
1211	MSTRG.64680.4	MD08G1112500;MD08G1112100;MD08G1112400;MD08G1112900;MD08G1111800;MD08G1111900;MD08G1112600;MD08G1112200;MD08G1112000;MD08G1111700;MD08G1112700
1212	MSTRG.20927.2	MD02G1275200;MD02G1275400;MD02G1275600;MD02G1275100;MD02G1276200;MD02G1275800;MD02G1275900;MD02G1276000;MD02G1275500;MD02G1275300;MD02G1275700
1213	MSTRG.54542.6	MD07G1042000;MD07G1043400;MD07G1041800;MD07G1042300;MD07G1042900;MD07G1043300;MD07G1043100;MD07G1042400;MD07G1042100;MD07G1042200;MD07G1043000;MD07G1041900;MD07G1043200
1214	MSTRG.86276.2	MD10G1327700;MD10G1328100;MD10G1327600;MD10G1327800;MD10G1326800;MD10G1328800;MD10G1329400;MD10G1327100;MD10G1329700;MD10G1329300;MD10G1327000;MD10G1329800;MD10G1329500;MD10G1328600;MD10G1327400;MD10G1328900;MD10G1329100;MD10G1327300;MD10G1328500;MD10G1329900;MD10G1328000;MD10G1327500;MD10G1329600;MD10G1327200;MD10G1327900;MD10G1326500;MD10G1329200;MD10G1329000;MD10G1326900;MD10G1328400
1215	MSTRG.120737.2	MD15G1119800;MD15G1120300;MD15G1121500;MD15G1119900;MD15G1120100;MD15G1120700;MD15G1119300;MD15G1119500;MD15G1121700;MD15G1120500;MD15G1120400;MD15G1119400;MD15G1120900;MD15G1119200;MD15G1119100;MD15G1121000;MD15G1121800;MD15G1121300;MD15G1121100;MD15G1120000;MD15G1119600;MD15G1121400;MD15G1121200;MD15G1120800;MD15G1120600;MD15G1119700
1216	MSTRG.77532.2	MD10G1018500;MD10G1018300;MD10G1019600;MD10G1018900;MD10G1017900;MD10G1019100;MD10G1019700;MD10G1019500;MD10G1018100;MD10G1018600;MD10G1018000;MD10G1018400;MD10G1019400;MD10G1019000;MD10G1019300;MD10G1018700;MD10G1019200;MD10G1018200
1217	MSTRG.108371.1	MD13G1220900;MD13G1221400;MD13G1220400;MD13G1219800;MD13G1220200;MD13G1219900;MD13G1221000;MD13G1220000;MD13G1220100;MD13G1221600;MD13G1221300;MD13G1221500;MD13G1220700;MD13G1221200;MD13G1221100;MD13G1220800;MD13G1219600;MD13G1220300
1218	MSTRG.133110.1	MD16G1114300;MD16G1114800;MD16G1114400;MD16G1115300;MD16G1114900;MD16G1113600;MD16G1113700;MD16G1115000;MD16G1113800
1219	MSTRG.40491.1	MD05G1108500;MD05G1108800;MD05G1108000;MD05G1107900;MD05G1108300;MD05G1108100;MD05G1108200;MD05G1108700;MD05G1108600;MD05G1108400
1220	MSTRG.123833.9	MD15G1235100;MD15G1235600;MD15G1236500;MD15G1236000;MD15G1236200;MD15G1235700;MD15G1235000;MD15G1236700;MD15G1236600;MD15G1235900;MD15G1236900;MD15G1235500;MD15G1235300;MD15G1235200;MD15G1236100;MD15G1237000;MD15G1236300;MD15G1236400;MD15G1237100;MD15G1236800;MD15G1235400
1221	MSTRG.84430.1	MD10G1255800;MD10G1255700;MD10G1255900;MD10G1256200;MD10G1255600;MD10G1256300;MD10G1256000;MD10G1256100;MD10G1256400
1222	MSTRG.134154.1	MD16G1153800;MD16G1153400;MD16G1154700;MD16G1153700;MD16G1154600;MD16G1154200;MD16G1154500;MD16G1154000;MD16G1155200;MD16G1154400;MD16G1153900;MD16G1154900;MD16G1155300;MD16G1153200;MD16G1154800;MD16G1153600;MD16G1153500;MD16G1155000;MD16G1153300;MD16G1155100
1223	MSTRG.79939.11	MD10G1091400;MD10G1091500;MD10G1091900;MD10G1091600
1224	MSTRG.6732.20	MD00G1190200;MD00G1189900;MD00G1190000;MD00G1190500
1225	MSTRG.102463.7	MD13G1002500;MD13G1000100;MD13G1001400;MD13G1001700;MD13G1001300;MD13G1000200;MD13G1000300;MD13G1002700;MD13G1002600;MD13G1000400;MD13G1002100;MD13G1001900;MD13G1001100;MD13G1001800;MD13G1000600;MD13G1002200;MD13G1001600;MD13G1002300;MD13G1002000;MD13G1002400;MD13G1000800;MD13G1000500;MD13G1001200
1226	MSTRG.127090.1	MD15G1342700;MD15G1342800;MD15G1342400;MD15G1342600;MD15G1343000;MD15G1342500
1227	MSTRG.8811.1	MD01G1037800;MD01G1037900;MD01G1037700;MD01G1037600;MD01G1038300;MD01G1038000;MD01G1038200
1228	MSTRG.98767.1	MD12G1121300;MD12G1121900;MD12G1121800;MD12G1121000;MD12G1121400;MD12G1121700;MD12G1121200;MD12G1122000
1229	MSTRG.109535.2	MD13G1257800
1230	MSTRG.26473.2	MD03G1166300;MD03G1165800;MD03G1165900;MD03G1166000
1231	MSTRG.87777.1	MD11G1055100;MD11G1055600;MD11G1054600;MD11G1054400;MD11G1054000;MD11G1054800;MD11G1055700;MD11G1056000;MD11G1054500;MD11G1053800;MD11G1054300;MD11G1054100;MD11G1055300;MD11G1055400;MD11G1053900;MD11G1055800;MD11G1054700;MD11G1055900;MD11G1055200;MD11G1054900;MD11G1054200;MD11G1055500
1232	MSTRG.109500.1	MD13G1257400;MD13G1257200;MD13G1257100;MD13G1257300
1233	MSTRG.134419.1	MD16G1161500;MD16G1161100;MD16G1160400;MD16G1160300;MD16G1162100;MD16G1160200;MD16G1161400;MD16G1161300;MD16G1162000;MD16G1161700;MD16G1161800;MD16G1160700;MD16G1160500;MD16G1161200;MD16G1160800;MD16G1161900;MD16G1160600;MD16G1161600;MD16G1161000;MD16G1160900
1234	MSTRG.106386.1	MD13G1159200;MD13G1158200;MD13G1159400;MD13G1159300;MD13G1158700;MD13G1159500;MD13G1158300;MD13G1159700;MD13G1159100;MD13G1159000;MD13G1158800;MD13G1159600;MD13G1158900;MD13G1158400
1235	MSTRG.24097.3	MD03G1094600;MD03G1092900;MD03G1093600;MD03G1093300;MD03G1092800;MD03G1093500;MD03G1093000;MD03G1093400;MD03G1093100;MD03G1094200;MD03G1093800;MD03G1094500;MD03G1094400;MD03G1094000;MD03G1093900
1236	MSTRG.58133.4	MD07G1162100;MD07G1160900;MD07G1161400;MD07G1161600;MD07G1160800;MD07G1161000;MD07G1161300;MD07G1161900;MD07G1161800;MD07G1162000;MD07G1161100;MD07G1161700;MD07G1161500
1237	MSTRG.68373.6	MD08G1229100;MD08G1230000;MD08G1230100;MD08G1228300;MD08G1230200;MD08G1227900;MD08G1229000;MD08G1229900;MD08G1229300;MD08G1229700;MD08G1228000;MD08G1230300;MD08G1227800;MD08G1228100;MD08G1228700;MD08G1229500;MD08G1228600;MD08G1228500;MD08G1228400;MD08G1228200;MD08G1229200;MD08G1229600;MD08G1228900;MD08G1229400
1238	MSTRG.25770.1	MD03G1147900;MD03G1147200;MD03G1147700;MD03G1147500;MD03G1147400;MD03G1148000;MD03G1147300;MD03G1147600;MD03G1147800
1239	MSTRG.85530.1	MD10G1296600;MD10G1296500;MD10G1296900;MD10G1296200;MD10G1295800;MD10G1296800;MD10G1297500;MD10G1296300;MD10G1297200;MD10G1297000;MD10G1296400;MD10G1295600;MD10G1295900;MD10G1296100;MD10G1295500;MD10G1297600;MD10G1297800;MD10G1297400;MD10G1297300;MD10G1296700;MD10G1297100;MD10G1296000
1240	MSTRG.39773.1	MD05G1085800;MD05G1085200;MD05G1085700
1241	MSTRG.80776.1	MD10G1117400;MD10G1116400;MD10G1116800;MD10G1117500;MD10G1117900;MD10G1117200;MD10G1117000;MD10G1117700;MD10G1116600;MD10G1117300;MD10G1116900;MD10G1116500;MD10G1117600
1242	MSTRG.105774.1	MD13G1133700;MD13G1133800;MD13G1133100;MD13G1133400;MD13G1132700;MD13G1134100;MD13G1132800;MD13G1133900;MD13G1133200;MD13G1134300;MD13G1133000;MD13G1134000;MD13G1132900;MD13G1133600;MD13G1133300;MD13G1134200
1243	MSTRG.129202.2	MD15G1404300;MD15G1404100;MD15G1405100;MD15G1405500;MD15G1404900;MD15G1403400;MD15G1404700;MD15G1403600;MD15G1404800;MD15G1404500;MD15G1403800;MD15G1405000;MD15G1403700;MD15G1404400;MD15G1405400;MD15G1404000;MD15G1404600;MD15G1404200;MD15G1403500;MD15G1405200;MD15G1405300;MD15G1403900
1244	MSTRG.113825.1	MD14G1100800;MD14G1099800;MD14G1100100;MD14G1100600;MD14G1100900;MD14G1100700;MD14G1100200
1245	MSTRG.78850.1	MD10G1064400;MD10G1064100;MD10G1064700;MD10G1065000;MD10G1064300;MD10G1064600;MD10G1064500;MD10G1064900;MD10G1064200
1246	MSTRG.78010.17	MD10G1036900;MD10G1037300;MD10G1036200;MD10G1036500;MD10G1036300;MD10G1037000;MD10G1037200;MD10G1037500;MD10G1036400;MD10G1037400
1247	MSTRG.8731.1	MD01G1037100;MD01G1036300;MD01G1036400;MD01G1037000;MD01G1036500;MD01G1036700;MD01G1036900;MD01G1036600
1248	MSTRG.84282.1	MD10G1247700;MD10G1248700;MD10G1247800;MD10G1247600;MD10G1247300;MD10G1247100;MD10G1247200;MD10G1248000;MD10G1248400;MD10G1248100;MD10G1247400;MD10G1248500;MD10G1247000;MD10G1247900;MD10G1248600;MD10G1248800;MD10G1248200;MD10G1248300;MD10G1247500
1249	MSTRG.14989.203	MD02G1052000;MD02G1054700;MD02G1050800;MD02G1055400;MD02G1051000;MD02G1051700;MD02G1055300;MD02G1050900;MD02G1050700;MD02G1052300;MD02G1051300;MD02G1051200;MD02G1054900;MD02G1052100;MD02G1055600;MD02G1055000;MD02G1051900;MD02G1052200;MD02G1055500;MD02G1051400;MD02G1055200;MD02G1050600;MD02G1051800;MD02G1051100
1250	MSTRG.133317.1	MD16G1120900;MD16G1122900;MD16G1121000;MD16G1122300;MD16G1122200;MD16G1121700;MD16G1121200;MD16G1121900;MD16G1121600;MD16G1122100;MD16G1122400;MD16G1121100;MD16G1121800;MD16G1122000
1251	MSTRG.64559.5	MD08G1108900;MD08G1109000;MD08G1108400;MD08G1109300;MD08G1109200;MD08G1107800;MD08G1107900;MD08G1107500;MD08G1107600;MD08G1108500;MD08G1108700;MD08G1108100;MD08G1108000;MD08G1107700;MD08G1109500;MD08G1108800;MD08G1109100;MD08G1108300;MD08G1108600
1252	MSTRG.131788.2	MD16G1060100;MD16G1058600;MD16G1060200;MD16G1060300;MD16G1060700;MD16G1058300;MD16G1059700;MD16G1060600;MD16G1060000;MD16G1058700;MD16G1059900;MD16G1059200;MD16G1058900;MD16G1060400;MD16G1059500;MD16G1058500;MD16G1060800;MD16G1059100;MD16G1060500;MD16G1059600;MD16G1059300;MD16G1059400;MD16G1059800;MD16G1058800
1253	MSTRG.129636.1	MD15G1421700;MD15G1422000;MD15G1422300;MD15G1421600;MD15G1422200;MD15G1421300;MD15G1420600;MD15G1421400;MD15G1420900;MD15G1420800;MD15G1420700;MD15G1422100;MD15G1420500;MD15G1421900;MD15G1421100;MD15G1421500
1254	MSTRG.20980.2	MD02G1277000;MD02G1277300;MD02G1277200;MD02G1277400;MD02G1277900;MD02G1276800;MD02G1276700;MD02G1276900;MD02G1277700;MD02G1277600;MD02G1277800;MD02G1277100;MD02G1278100;MD02G1277500;MD02G1278000
1255	MSTRG.4418.4	MD00G1128500;MD00G1128300;MD00G1129000;MD00G1128800;MD00G1128400;MD00G1129100
1256	MSTRG.29703.3	MD03G1286800;MD03G1286000;MD03G1283800;MD03G1284600;MD03G1283900;MD03G1285000;MD03G1284900;MD03G1286400;MD03G1286300;MD03G1286900;MD03G1286600;MD03G1284800;MD03G1284200;MD03G1283700;MD03G1286200;MD03G1285700;MD03G1285900;MD03G1285600;MD03G1286100;MD03G1285400;MD03G1285800;MD03G1284300;MD03G1285300;MD03G1286500;MD03G1286700;MD03G1284700;MD03G1285100;MD03G1284400;MD03G1284500;MD03G1285200;MD03G1285…
1257	MSTRG.51423.3	MD06G1150200;MD06G1150400;MD06G1149600;MD06G1149800;MD06G1150300;MD06G1149300;MD06G1149500;MD06G1150600;MD06G1149700;MD06G1149400;MD06G1150500
1258	MSTRG.104381.40	MD13G1081500;MD13G1083700;MD13G1082000;MD13G1082100;MD13G1081400;MD13G1083000;MD13G1082900;MD13G1083500;MD13G1082300;MD13G1081800;MD13G1082400;MD13G1084500;MD13G1083400;MD13G1084400;MD13G1082700;MD13G1083200;MD13G1082200;MD13G1084300;MD13G1082500;MD13G1082800;MD13G1083600;MD13G1081900;MD13G1081600;MD13G1081300;MD13G1084100;MD13G1081700;MD13G1084200;MD13G1082600;MD13G1081200
1259	MSTRG.75195.2	MD09G1228800;MD09G1229800;MD09G1229700;MD09G1229300;MD09G1229400;MD09G1229200;MD09G1229500;MD09G1229100;MD09G1228700;MD09G1229900;MD09G1228500;MD09G1228600;MD09G1229000
1260	MSTRG.120721.1	MD15G1121000;MD15G1121100;MD15G1118600;MD15G1118800;MD15G1119100;MD15G1118900;MD15G1119600;MD15G1120000;MD15G1120600;MD15G1120800;MD15G1119700;MD15G1121200;MD15G1119900;MD15G1119000;MD15G1120100;MD15G1120700;MD15G1119800;MD15G1120300;MD15G1120400;MD15G1119400;MD15G1120900;MD15G1119200;MD15G1120200;MD15G1119500;MD15G1119300;MD15G1120500
1261	MSTRG.80111.1	MD10G1097100;MD10G1096400;MD10G1097000;MD10G1096700;MD10G1096500;MD10G1097300;MD10G1097200;MD10G1097400;MD10G1096900;MD10G1096800
1262	MSTRG.79939.10	MD10G1091600;MD10G1091900;MD10G1091400;MD10G1091500
1263	MSTRG.112891.3	MD14G1072600;MD14G1073700;MD14G1072800;MD14G1073900;MD14G1072900;MD14G1073300;MD14G1073000;MD14G1072700;MD14G1073100;MD14G1073500;MD14G1073400;MD14G1073800;MD14G1073200;MD14G1073600
1264	MSTRG.88831.39	MD11G1108000;MD11G1108800;MD11G1107700;MD11G1106800;MD11G1106300;MD11G1107500;MD11G1106100;MD11G1108400;MD11G1107800;MD11G1107600;MD11G1108300;MD11G1108100;MD11G1108500;MD11G1107900;MD11G1106200;MD11G1108700;MD11G1106400;MD11G1108200;MD11G1106500;MD11G1106700;MD11G1108600
1265	MSTRG.54918.4	MD07G1058000;MD07G1058100;MD07G1058700;MD07G1058200;MD07G1059500;MD07G1059200;MD07G1057800;MD07G1059400;MD07G1058900;MD07G1059300;MD07G1058300;MD07G1058400;MD07G1058600;MD07G1058500;MD07G1059000;MD07G1057900;MD07G1057600;MD07G1059100;MD07G1057700
1266	MSTRG.6290.1	MD00G1178400
1267	MSTRG.133128.1	MD16G1114900;MD16G1115900;MD16G1115500;MD16G1115000;MD16G1115700;MD16G1114600;MD16G1115600;MD16G1114300;MD16G1114800;MD16G1115300;MD16G1115400;MD16G1114400;MD16G1116200;MD16G1115800;MD16G1116100
1268	MSTRG.47207.2	MD06G1013300;MD06G1012600;MD06G1012900;MD06G1013200;MD06G1014000;MD06G1013900;MD06G1013500;MD06G1013100;MD06G1014100;MD06G1012500;MD06G1012400;MD06G1013000;MD06G1013800;MD06G1013600;MD06G1013700
1269	MSTRG.67537.1	MD08G1200400;MD08G1200100;MD08G1200300;MD08G1199600;MD08G1200200;MD08G1200000;MD08G1199500;MD08G1200500;MD08G1199400;MD08G1199700
1270	MSTRG.103867.2	MD13G1062000;MD13G1060200;MD13G1059800;MD13G1062200;MD13G1061200;MD13G1060900;MD13G1060700;MD13G1060100;MD13G1060800;MD13G1061400;MD13G1059600;MD13G1061100;MD13G1059500;MD13G1059900;MD13G1060300;MD13G1059400;MD13G1060600;MD13G1061800;MD13G1060000;MD13G1061900;MD13G1061700;MD13G1060400;MD13G1061300;MD13G1061600;MD13G1062300;MD13G1061000;MD13G1061500;MD13G1060500;MD13G1062100
1271	MSTRG.127250.1	MD15G1346300;MD15G1346700;MD15G1346100;MD15G1346800;MD15G1346200;MD15G1346400
1272	MSTRG.55414.6	MD07G1079600;MD07G1079300;MD07G1079700;MD07G1079400;MD07G1078700;MD07G1078900;MD07G1078800;MD07G1078600;MD07G1078400;MD07G1079100;MD07G1079800;MD07G1078500;MD07G1079200;MD07G1079500;MD07G1078300
1273	MSTRG.35007.5	MD04G1169800;MD04G1168500;MD04G1169200;MD04G1168700;MD04G1168900;MD04G1168600;MD04G1169400;MD04G1169600;MD04G1169300;MD04G1168800;MD04G1169500
1274	MSTRG.40447.2	MD05G1107000;MD05G1106000;MD05G1107500;MD05G1107700;MD05G1106400;MD05G1106900;MD05G1106600;MD05G1106800;MD05G1107600;MD05G1106700;MD05G1106100;MD05G1106300;MD05G1106200;MD05G1107300
1275	MSTRG.146146.2	MD17G1267200;MD17G1266300;MD17G1266700;MD17G1267100;MD17G1265500;MD17G1267300;MD17G1265800;MD17G1266200;MD17G1265400;MD17G1265300;MD17G1267700;MD17G1266100;MD17G1266600;MD17G1265700;MD17G1265900;MD17G1267500;MD17G1267600;MD17G1266000;MD17G1266400;MD17G1265600;MD17G1266900;MD17G1267000;MD17G1267400
1276	MSTRG.138866.1	MD16G1287300;MD16G1287600;MD16G1286900;MD16G1287400;MD16G1287200;MD16G1287800;MD16G1287100;MD16G1287500;MD16G1287000
1277	MSTRG.128368.3	MD15G1379100;MD15G1379300;MD15G1379000;MD15G1378900;MD15G1378800
1278	MSTRG.66060.2	MD08G1156200;MD08G1157200;MD08G1155800;MD08G1157000;MD08G1156700;MD08G1155900;MD08G1157100;MD08G1155600;MD08G1156600;MD08G1156000;MD08G1156800;MD08G1156900;MD08G1155700;MD08G1156500;MD08G1157300;MD08G1156300;MD08G1156100;MD08G1157400
1279	MSTRG.126509.9	MD15G1325700;MD15G1325300;MD15G1325900;MD15G1326000;MD15G1325800
1280	MSTRG.4979.3	MD00G1143400;MD00G1143500;MD00G1143000;MD00G1143300
1281	MSTRG.19939.1	MD02G1238000;MD02G1238200;MD02G1237800;MD02G1237900;MD02G1238800;MD02G1237700;MD02G1238700;MD02G1238500;MD02G1239000;MD02G1238900;MD02G1238100;MD02G1238600;MD02G1239100;MD02G1238400;MD02G1237600
1282	MSTRG.73744.1	MD09G1192200;MD09G1192700;MD09G1192900;MD09G1192800;MD09G1192600;MD09G1193100;MD09G1192500;MD09G1193200;MD09G1193000;MD09G1192300
1283	MSTRG.79939.2	MD10G1091500;MD10G1091400;MD10G1091600;MD10G1091900
1284	MSTRG.98669.1	MD12G1118800;MD12G1118100;MD12G1119100;MD12G1119200;MD12G1118700;MD12G1118400;MD12G1118900;MD12G1118300;MD12G1118200;MD12G1119300;MD12G1118500;MD12G1118600
1285	MSTRG.120409.1	MD15G1109600;MD15G1108100;MD15G1108000;MD15G1108400;MD15G1108500;MD15G1110000;MD15G1108800;MD15G1108700;MD15G1107500;MD15G1109500;MD15G1109100;MD15G1107700;MD15G1107400;MD15G1108900;MD15G1108300;MD15G1109700;MD15G1108600;MD15G1108200;MD15G1109300;MD15G1110100;MD15G1109900;MD15G1109200;MD15G1109800;MD15G1107900;MD15G1107800;MD15G1109400;MD15G1107600
1286	MSTRG.144165.32	MD17G1198300;MD17G1198900;MD17G1198800;MD17G1198100;MD17G1198500;MD17G1198700;MD17G1198400
1287	MSTRG.144762.1	MD17G1218300;MD17G1218500;MD17G1218700;MD17G1217500;MD17G1218200;MD17G1219000;MD17G1218600;MD17G1217800;MD17G1218100;MD17G1218000;MD17G1217900;MD17G1217600;MD17G1219100;MD17G1218900;MD17G1218800;MD17G1217700
1288	MSTRG.102129.2	MD12G1251800;MD12G1253100;MD12G1252900;MD12G1250900;MD12G1253000;MD12G1252500;MD12G1254000;MD12G1254300;MD12G1253300;MD12G1252200;MD12G1251600;MD12G1252600;MD12G1253400;MD12G1250800;MD12G1252700;MD12G1251100;MD12G1251900;MD12G1253900;MD12G1253800;MD12G1253200;MD12G1251000;MD12G1251400;MD12G1251500;MD12G1253500;MD12G1252000;MD12G1253600;MD12G1253700;MD12G1251300;MD12G1251200;MD12G1252100;MD12G1251…
1289	MSTRG.31737.3	MD04G1057600;MD04G1057800;MD04G1058200;MD04G1058000;MD04G1057500;MD04G1057400
1290	MSTRG.130267.2	MD15G1445300;MD15G1445600;MD15G1445400;MD15G1445500;MD15G1445700
1291	MSTRG.76605.9	MD09G1280000;MD09G1280900;MD09G1280400;MD09G1280300;MD09G1281200;MD09G1281100;MD09G1281300;MD09G1280600;MD09G1281000;MD09G1279800;MD09G1279900;MD09G1280800;MD09G1280200;MD09G1279700;MD09G1280700;MD09G1280100;MD09G1279600;MD09G1280500
1292	MSTRG.76418.6	MD09G1269500;MD09G1270300;MD09G1269800;MD09G1269600;MD09G1270500;MD09G1270900;MD09G1270800;MD09G1270000;MD09G1271200;MD09G1270100;MD09G1269700;MD09G1271000;MD09G1270600;MD09G1269900;MD09G1271300;MD09G1270700;MD09G1270200;MD09G1271100
1293	MSTRG.65032.9	MD08G1123900;MD08G1124500;MD08G1124900;MD08G1125100;MD08G1124000;MD08G1123800;MD08G1124200;MD08G1124600;MD08G1124400;MD08G1124100;MD08G1125000;MD08G1124700;MD08G1124800
1294	MSTRG.97507.5	MD12G1089200;MD12G1089300;MD12G1089400;MD12G1089100;MD12G1088900;MD12G1088800
1295	MSTRG.68316.4	MD08G1225700;MD08G1226000;MD08G1227700;MD08G1227100;MD08G1227300;MD08G1226800;MD08G1227900;MD08G1225900;MD08G1226300;MD08G1226700;MD08G1226100;MD08G1228000;MD08G1225500;MD08G1226600;MD08G1226200;MD08G1227800;MD08G1227400;MD08G1226500;MD08G1227000;MD08G1228100;MD08G1227200;MD08G1227600;MD08G1225400;MD08G1225600;MD08G1226400;MD08G1226900;MD08G1227500;MD08G1225800
1296	MSTRG.74826.1	MD09G1221300;MD09G1221000;MD09G1220800
1297	MSTRG.113777.1	MD14G1098200;MD14G1098500;MD14G1098800;MD14G1099100;MD14G1099000;MD14G1098300;MD14G1098700;MD14G1098400
1298	MSTRG.44022.1	MD05G1247700;MD05G1246800;MD05G1247600;MD05G1247000;MD05G1246400;MD05G1247100;MD05G1248100;MD05G1247400;MD05G1247800;MD05G1246500;MD05G1247500;MD05G1246300;MD05G1247900;MD05G1248000;MD05G1248200;MD05G1246900;MD05G1247200;MD05G1246700
1299	MSTRG.54389.1	MD07G1034000;MD07G1033600;MD07G1034500;MD07G1035000;MD07G1034700;MD07G1035100;MD07G1033300;MD07G1035500;MD07G1033900;MD07G1033500;MD07G1034800;MD07G1034400;MD07G1035300;MD07G1034300;MD07G1033400;MD07G1035200;MD07G1035400;MD07G1034100;MD07G1033800;MD07G1035900;MD07G1033700;MD07G1034900
1300	MSTRG.3855.1	MD00G1113000;MD00G1113200;MD00G1113300
1301	MSTRG.112512.1	MD14G1059500;MD14G1059700;MD14G1059400;MD14G1059600;MD14G1059200
1302	MSTRG.44682.36	MD05G1272400;MD05G1273700;MD05G1274300;MD05G1272800;MD05G1273100;MD05G1272100;MD05G1274500;MD05G1274600;MD05G1272900;MD05G1272500;MD05G1272700;MD05G1274400;MD05G1273800;MD05G1272300;MD05G1274200;MD05G1273300;MD05G1272600;MD05G1274000;MD05G1273900;MD05G1273000;MD05G1274100
1303	MSTRG.53920.2	MD07G1009000;MD07G1007400;MD07G1008400;MD07G1007600;MD07G1007300;MD07G1008300;MD07G1008800;MD07G1008600;MD07G1008900;MD07G1008500;MD07G1007500;MD07G1007700;MD07G1007800;MD07G1008000;MD07G1008700;MD07G1007900
1304	MSTRG.41053.2	MD05G1126100;MD05G1125100;MD05G1126000;MD05G1125300;MD05G1125200;MD05G1125400;MD05G1125700;MD05G1125900;MD05G1125600
1305	MSTRG.29703.1	MD03G1284600;MD03G1286800;MD03G1286000;MD03G1283800;MD03G1283900;MD03G1285000;MD03G1284900;MD03G1286400;MD03G1286300;MD03G1286900;MD03G1286600;MD03G1284800;MD03G1284200;MD03G1286200;MD03G1283700;MD03G1285700;MD03G1285900;MD03G1285600;MD03G1286100;MD03G1285400;MD03G1285800;MD03G1284300;MD03G1286500;MD03G1285300;MD03G1286700;MD03G1285100;MD03G1284700;MD03G1284400;MD03G1284500;MD03G1285200;MD03G1285…
1306	MSTRG.49998.42	MD06G1096700;MD06G1097100;MD06G1097000;MD06G1096800;MD06G1098000
1307	MSTRG.68498.1	MD08G1233200;MD08G1234100;MD08G1233100;MD08G1233700;MD08G1234400;MD08G1234200;MD08G1233900;MD08G1233000;MD08G1234300;MD08G1233500;MD08G1233400;MD08G1234000;MD08G1233800;MD08G1232900;MD08G1232800
1308	MSTRG.50378.2	MD06G1111900;MD06G1112700;MD06G1110000;MD06G1109700;MD06G1110100;MD06G1109600;MD06G1112100;MD06G1111600;MD06G1112000;MD06G1110700;MD06G1112400;MD06G1110900;MD06G1110600;MD06G1109900;MD06G1112300;MD06G1112200;MD06G1109500;MD06G1111700;MD06G1112600;MD06G1112500;MD06G1111400;MD06G1111100;MD06G1110300;MD06G1111000;MD06G1111500;MD06G1111800
1309	MSTRG.32407.1	MD04G1081000;MD04G1080700;MD04G1080600;MD04G1081300;MD04G1081200;MD04G1081100
1310	MSTRG.123844.1	MD15G1235600;MD15G1236000;MD15G1236500;MD15G1237300;MD15G1236200;MD15G1235700;MD15G1235900;MD15G1236600;MD15G1236700;MD15G1235500;MD15G1236900;MD15G1236300;MD15G1236100;MD15G1237000;MD15G1237400;MD15G1237200;MD15G1237100;MD15G1236800
1311	MSTRG.131854.1	MD16G1063800;MD16G1062000;MD16G1061400;MD16G1063600;MD16G1062800;MD16G1061900;MD16G1063100;MD16G1061000;MD16G1062900;MD16G1060800;MD16G1062500;MD16G1061600;MD16G1062400;MD16G1062100;MD16G1063500;MD16G1060400;MD16G1061800;MD16G1062600;MD16G1060700;MD16G1061500;MD16G1060600;MD16G1062200;MD16G1062700;MD16G1060900;MD16G1064000;MD16G1061100;MD16G1063200;MD16G1063900;MD16G1064100;MD16G1060500;MD16G1061…
1312	MSTRG.106519.2	MD13G1162700;MD13G1164700;MD13G1164200;MD13G1162600;MD13G1164500;MD13G1163600;MD13G1163500;MD13G1164600;MD13G1164000;MD13G1164300;MD13G1163300;MD13G1163900;MD13G1163800;MD13G1164100;MD13G1163700
1313	MSTRG.8288.13	MD01G1025500;MD01G1026400;MD01G1026100;MD01G1025400;MD01G1026300;MD01G1025600;MD01G1026000;MD01G1026200;MD01G1025900;MD01G1025800
1314	MSTRG.82851.1	MD10G1190500;MD10G1191900;MD10G1191300;MD10G1191700;MD10G1190000;MD10G1191100;MD10G1190400;MD10G1191400;MD10G1190800;MD10G1189800;MD10G1191600;MD10G1191800;MD10G1189700;MD10G1190700;MD10G1190900;MD10G1190200;MD10G1191500;MD10G1191200;MD10G1190100;MD10G1190300;MD10G1189900
1315	MSTRG.97292.1	MD12G1080700;MD12G1082000;MD12G1081900;MD12G1080800;MD12G1081500;MD12G1081100;MD12G1082300;MD12G1081000;MD12G1081700;MD12G1081600;MD12G1082200;MD12G1082400;MD12G1081200;MD12G1082100;MD12G1080900;MD12G1081800
1316	MSTRG.85484.22	MD10G1295400;MD10G1295000;MD10G1294200;MD10G1293200;MD10G1294500;MD10G1295200;MD10G1293600;MD10G1295100;MD10G1294100;MD10G1294900;MD10G1293100;MD10G1295300;MD10G1294700;MD10G1293400;MD10G1293800;MD10G1293700;MD10G1294600;MD10G1293900;MD10G1294300;MD10G1294000
1317	MSTRG.35259.1	MD04G1177300;MD04G1177600;MD04G1178100;MD04G1176700;MD04G1177900;MD04G1178000;MD04G1178500;MD04G1177000;MD04G1178200;MD04G1177200;MD04G1177400;MD04G1178400;MD04G1178300;MD04G1177100;MD04G1177500;MD04G1176900;MD04G1177700;MD04G1177800
1318	MSTRG.84454.4	MD10G1256800;MD10G1256300;MD10G1256000;MD10G1257800;MD10G1257300;MD10G1257600;MD10G1256700;MD10G1257900;MD10G1255900;MD10G1256200;MD10G1258200;MD10G1258100;MD10G1257500;MD10G1256100;MD10G1256400;MD10G1257700;MD10G1258000;MD10G1255800;MD10G1257000;MD10G1256900;MD10G1256600
1319	MSTRG.80044.1	MD10G1094900;MD10G1094100;MD10G1094600;MD10G1094700;MD10G1094500;MD10G1094200;MD10G1094800
1320	MSTRG.133038.4	MD16G1111400;MD16G1110200;MD16G1113000;MD16G1110300;MD16G1110700;MD16G1112200;MD16G1112000;MD16G1111300;MD16G1112100;MD16G1111100;MD16G1113300;MD16G1113100;MD16G1110800;MD16G1112400;MD16G1112800;MD16G1111200;MD16G1110400;MD16G1112700;MD16G1112600;MD16G1111800;MD16G1111700;MD16G1111000;MD16G1110500;MD16G1110100;MD16G1110900;MD16G1111600;MD16G1112300;MD16G1110600;MD16G1113200;MD16G1112900;MD16G1111…
1321	MSTRG.100152.2	MD12G1170600;MD12G1173100;MD12G1171100;MD12G1172900;MD12G1171500;MD12G1173200;MD12G1170700;MD12G1171200;MD12G1172200;MD12G1171800;MD12G1173300;MD12G1172300;MD12G1173000;MD12G1170900;MD12G1172000;MD12G1172700;MD12G1171300;MD12G1171000;MD12G1172800;MD12G1172400;MD12G1172100;MD12G1171600;MD12G1172500;MD12G1170800;MD12G1171900;MD12G1171700;MD12G1171400
1322	MSTRG.75535.3	MD09G1237700;MD09G1238000;MD09G1238100;MD09G1237400;MD09G1237500;MD09G1237600;MD09G1237900
1323	MSTRG.15638.2	MD02G1082700;MD02G1082100;MD02G1081500;MD02G1083600;MD02G1083300;MD02G1082800;MD02G1083100;MD02G1083700;MD02G1081400;MD02G1082400;MD02G1082200;MD02G1083200;MD02G1083800;MD02G1083500;MD02G1082300;MD02G1083000;MD02G1082000;MD02G1081800;MD02G1083900;MD02G1084000;MD02G1083400;MD02G1081600;MD02G1081900;MD02G1082600;MD02G1082500;MD02G1081700
1324	MSTRG.79266.1	MD10G1075200;MD10G1075300;MD10G1075100;MD10G1074500;MD10G1075600;MD10G1075400;MD10G1074600;MD10G1074900;MD10G1074700;MD10G1075000;MD10G1075500
1325	MSTRG.46433.2	MD05G1350300;MD05G1349500;MD05G1350800;MD05G1351400;MD05G1349400;MD05G1351100;MD05G1352000;MD05G1352600;MD05G1352200;MD05G1352500;MD05G1351700;MD05G1350400;MD05G1350700;MD05G1351300;MD05G1350500;MD05G1349300;MD05G1351200;MD05G1352300;MD05G1352700;MD05G1349600;MD05G1352100;MD05G1351900;MD05G1349700;MD05G1351600;MD05G1349900;MD05G1350600;MD05G1350000;MD05G1351000;MD05G1350900;MD05G1349800;MD05G1352…
1326	MSTRG.53154.2	MD06G1220600;MD06G1221700;MD06G1221200;MD06G1220000;MD06G1219700;MD06G1220900;MD06G1221600;MD06G1221000;MD06G1220200;MD06G1221500;MD06G1219900;MD06G1221400;MD06G1219800;MD06G1219000;MD06G1221300;MD06G1219200;MD06G1220400;MD06G1218800;MD06G1220800;MD06G1218500;MD06G1219600;MD06G1218900;MD06G1221100;MD06G1219100;MD06G1219300;MD06G1218600;MD06G1220700
1327	MSTRG.13846.1	MD01G1238500;MD01G1238900;MD01G1239600;MD01G1238400;MD01G1238200;MD01G1240200;MD01G1239400;MD01G1237600;MD01G1237700;MD01G1239300;MD01G1239700;MD01G1239000;MD01G1239100;MD01G1238800;MD01G1238300;MD01G1238700;MD01G1240100;MD01G1239200;MD01G1238100;MD01G1239500;MD01G1237800
1328	MSTRG.13166.1	MD01G1210600;MD01G1212100;MD01G1212000;MD01G1210400;MD01G1211200;MD01G1211100;MD01G1209800;MD01G1210500;MD01G1211300;MD01G1210900;MD01G1210100;MD01G1209900;MD01G1210000;MD01G1210700;MD01G1211400;MD01G1209700;MD01G1210200;MD01G1210800;MD01G1210300;MD01G1211000;MD01G1211500;MD01G1211900;MD01G1211800;MD01G1211600
1329	MSTRG.78804.1	MD10G1063000;MD10G1062600;MD10G1063300;MD10G1062800;MD10G1063800;MD10G1063500;MD10G1062500;MD10G1063400;MD10G1062900;MD10G1062700;MD10G1063600;MD10G1063100;MD10G1063700
1330	MSTRG.120013.1	MD15G1092700;MD15G1091000;MD15G1091800;MD15G1091600;MD15G1091500;MD15G1092200;MD15G1090400;MD15G1091700;MD15G1090800;MD15G1092400;MD15G1093400;MD15G1092100;MD15G1090300;MD15G1091100;MD15G1091200;MD15G1090900;MD15G1090500;MD15G1090700;MD15G1092900;MD15G1090600;MD15G1091400;MD15G1093200;MD15G1092000;MD15G1093000;MD15G1091300;MD15G1093300;MD15G1092800;MD15G1093100;MD15G1091900;MD15G1092500;MD15G1092…
1331	MSTRG.126914.1	MD15G1337500;MD15G1337000;MD15G1337200;MD15G1337100;MD15G1337600
1332	MSTRG.21811.1	MD02G1312700;MD02G1312900;MD02G1312600;MD02G1312500;MD02G1312100;MD02G1313000;MD02G1313200;MD02G1311900;MD02G1312800;MD02G1313100;MD02G1312300;MD02G1312000
1333	MSTRG.27723.1	MD03G1207700;MD03G1207200;MD03G1207300;MD03G1207100;MD03G1207000;MD03G1207900;MD03G1206800;MD03G1207400;MD03G1207600
1334	MSTRG.22594.135	MD03G1024200;MD03G1025700;MD03G1025000;MD03G1026800;MD03G1024300;MD03G1024700;MD03G1024600;MD03G1025100;MD03G1026900;MD03G1024800;MD03G1026300;MD03G1025600;MD03G1027000;MD03G1026500;MD03G1024500;MD03G1025500;MD03G1026600;MD03G1025800;MD03G1026200;MD03G1024900;MD03G1024400;MD03G1026000;MD03G1026700
1335	MSTRG.144216.2	MD17G1200200;MD17G1199700;MD17G1200500;MD17G1199900;MD17G1200600;MD17G1199600;MD17G1200100;MD17G1201100;MD17G1201000;MD17G1200900;MD17G1200700
1336	MSTRG.82117.4	MD10G1164300;MD10G1163600;MD10G1163500;MD10G1164500;MD10G1164800;MD10G1165200;MD10G1163800;MD10G1164600;MD10G1164000;MD10G1164200;MD10G1165100;MD10G1165000;MD10G1165300;MD10G1164900;MD10G1164100;MD10G1163400;MD10G1163900;MD10G1163700;MD10G1164400;MD10G1164700
1337	MSTRG.46305.8	MD05G1345200;MD05G1344300;MD05G1343900;MD05G1343600;MD05G1344200;MD05G1345600;MD05G1343500;MD05G1345800;MD05G1343700;MD05G1345300;MD05G1344100;MD05G1343800;MD05G1344700;MD05G1345400;MD05G1345500;MD05G1344900;MD05G1345100;MD05G1344800;MD05G1345900;MD05G1344400;MD05G1345700;MD05G1345000;MD05G1344000;MD05G1344500
1338	MSTRG.10519.1	MD01G1094800;MD01G1095100;MD01G1095800;MD01G1096300;MD01G1095700;MD01G1096500;MD01G1096900;MD01G1095000;MD01G1096100;MD01G1097100;MD01G1097000;MD01G1096700;MD01G1096200;MD01G1097300;MD01G1096800;MD01G1095900;MD01G1095200;MD01G1095400;MD01G1095300;MD01G1097400;MD01G1096000;MD01G1097200;MD01G1096600;MD01G1096400
1339	MSTRG.32472.1	MD04G1082800;MD04G1082900;MD04G1082700;MD04G1082600
1340	MSTRG.91135.1	MD11G1183600;MD11G1183900;MD11G1183800;MD11G1183500
1341	MSTRG.66972.4	MD08G1183500;MD08G1183700;MD08G1183800;MD08G1184000;MD08G1183900;MD08G1184100;MD08G1183600
1342	MSTRG.141659.3	MD17G1119100;MD17G1118500;MD17G1118800;MD17G1118700;MD17G1118900;MD17G1118400;MD17G1117400;MD17G1117600;MD17G1117500;MD17G1117800;MD17G1117200;MD17G1117900;MD17G1118300;MD17G1117700;MD17G1118200;MD17G1118100;MD17G1117300;MD17G1118000;MD17G1118600
1343	MSTRG.9232.1	MD01G1050400;MD01G1050600;MD01G1050900;MD01G1051200;MD01G1050800;MD01G1050500;MD01G1051000;MD01G1051100;MD01G1050300;MD01G1051300
1344	MSTRG.116310.1	MD14G1185900;MD14G1185400;MD14G1185300;MD14G1184600;MD14G1186000;MD14G1185000;MD14G1184900;MD14G1186700;MD14G1185100;MD14G1186800;MD14G1186500;MD14G1185700;MD14G1184700;MD14G1185600;MD14G1186600;MD14G1185200;MD14G1186300;MD14G1186400;MD14G1184800;MD14G1186100;MD14G1186200;MD14G1185500
1345	MSTRG.8695.20	MD01G1036100;MD01G1035600;MD01G1035800;MD01G1035500;MD01G1036200
1346	MSTRG.39361.1	MD05G1071800;MD05G1072100;MD05G1072300;MD05G1071900;MD05G1071600;MD05G1072200;MD05G1071700
1347	MSTRG.109464.7	MD13G1256800;MD13G1256700
1348	MSTRG.27253.1	MD03G1191500;MD03G1192000;MD03G1191300;MD03G1192400;MD03G1192100;MD03G1192700;MD03G1192500;MD03G1191600;MD03G1192600;MD03G1191200;MD03G1191100;MD03G1192200;MD03G1192300;MD03G1191900;MD03G1191000;MD03G1191800;MD03G1192800;MD03G1191700;MD03G1191400
1349	MSTRG.76656.1	MD09G1281100;MD09G1281400;MD09G1281800;MD09G1281200;MD09G1282000;MD09G1280900;MD09G1282200;MD09G1281700;MD09G1281600;MD09G1282400;MD09G1281900;MD09G1281000;MD09G1282500;MD09G1282700;MD09G1281300;MD09G1281500;MD09G1282100;MD09G1282600
1350	MSTRG.144066.1	MD17G1194800;MD17G1194200;MD17G1194100;MD17G1194700;MD17G1194500;MD17G1195000;MD17G1194000;MD17G1193600;MD17G1194600;MD17G1193800;MD17G1194300;MD17G1193700;MD17G1194400;MD17G1193900;MD17G1194900
1351	MSTRG.44610.52	MD05G1269600;MD05G1269500;MD05G1268200;MD05G1269900;MD05G1269200;MD05G1268800;MD05G1269400;MD05G1269800;MD05G1268100;MD05G1269300;MD05G1268900;MD05G1269100;MD05G1269700;MD05G1269000;MD05G1270000;MD05G1268000;MD05G1268500;MD05G1267900;MD05G1268600;MD05G1268700;MD05G1268400
1352	MSTRG.62161.1	MD08G1013300;MD08G1013900;MD08G1011700;MD08G1011400;MD08G1013000;MD08G1012700;MD08G1012300;MD08G1014000;MD08G1013500;MD08G1011300;MD08G1011900;MD08G1011800;MD08G1012900;MD08G1013100;MD08G1012000;MD08G1013400;MD08G1013800;MD08G1013600;MD08G1011600;MD08G1013700;MD08G1012800
1353	MSTRG.133079.4	MD16G1112300;MD16G1113200;MD16G1113100;MD16G1112900;MD16G1112000;MD16G1112200;MD16G1113400;MD16G1113600;MD16G1112100;MD16G1113300;MD16G1113500;MD16G1112800;MD16G1112400;MD16G1113700;MD16G1113000;MD16G1113800;MD16G1112700;MD16G1112600
1354	MSTRG.130258.18	MD15G1445100;MD15G1445000
1355	MSTRG.11513.4	MD01G1137400;MD01G1137000;MD01G1136300;MD01G1136700;MD01G1137300;MD01G1136900;MD01G1136500;MD01G1136600;MD01G1136800;MD01G1136400;MD01G1137200;MD01G1137500
1356	MSTRG.3600.1	MD00G1107400;MD00G1107200;MD00G1107100;MD00G1106900;MD00G1106800;MD00G1106500;MD00G1107300;MD00G1107500;MD00G1106400;MD00G1106600
1357	MSTRG.64974.1	MD08G1123200;MD08G1122700;MD08G1123300;MD08G1123100;MD08G1122600;MD08G1122800;MD08G1122400;MD08G1123400;MD08G1122500;MD08G1123500
1358	MSTRG.139768.2	MD17G1040300;MD17G1040900;MD17G1041200;MD17G1041700;MD17G1040700;MD17G1040200;MD17G1041600;MD17G1042000;MD17G1040600;MD17G1042100;MD17G1040000;MD17G1041000;MD17G1041900;MD17G1042300;MD17G1040800;MD17G1042400;MD17G1042500;MD17G1041500;MD17G1039900;MD17G1042200;MD17G1040400;MD17G1040100;MD17G1042600;MD17G1040500
1359	MSTRG.42293.1	MD05G1180700;MD05G1179100;MD05G1179000;MD05G1179900;MD05G1179700;MD05G1179200;MD05G1179500;MD05G1180400;MD05G1180300;MD05G1180500;MD05G1179400;MD05G1179600;MD05G1180100;MD05G1180600;MD05G1180200;MD05G1179300;MD05G1179800
1360	MSTRG.65064.1	MD08G1124400;MD08G1124700;MD08G1124100;MD08G1124800;MD08G1125700;MD08G1126400;MD08G1126200;MD08G1126100;MD08G1125800;MD08G1124500;MD08G1124000;MD08G1124600;MD08G1126500;MD08G1125000;MD08G1126800;MD08G1125900;MD08G1124900;MD08G1125100;MD08G1124200;MD08G1126700;MD08G1126000
1361	MSTRG.87549.60	MD11G1044700;MD11G1046700;MD11G1044100;MD11G1043900;MD11G1045800;MD11G1044600;MD11G1044400;MD11G1045000;MD11G1045400;MD11G1044000;MD11G1046200;MD11G1045900;MD11G1045500;MD11G1046400;MD11G1045300;MD11G1046600;MD11G1044800;MD11G1045100;MD11G1046900;MD11G1046000;MD11G1046500;MD11G1046300;MD11G1046100;MD11G1044500;MD11G1046800;MD11G1045700
1362	MSTRG.105558.5	MD13G1126600;MD13G1126800;MD13G1127000;MD13G1126700;MD13G1126900;MD13G1126300;MD13G1126400;MD13G1126200;MD13G1127100
1363	MSTRG.1250.11	MD00G1038700;MD00G1040200;MD00G1040100;MD00G1037600;MD00G1039300;MD00G1038100;MD00G1039900;MD00G1040000;MD00G1038600;MD00G1038900;MD00G1037700;MD00G1038500;MD00G1039400;MD00G1038300;MD00G1038400;MD00G1039600;MD00G1038200;MD00G1039500;MD00G1038800
1364	MSTRG.144385.14	MD17G1205200;MD17G1207200;MD17G1205300;MD17G1207500;MD17G1205900;MD17G1205600;MD17G1205800;MD17G1206200;MD17G1207400;MD17G1205400;MD17G1206300;MD17G1207100;MD17G1207700;MD17G1206800;MD17G1206900;MD17G1207300;MD17G1205700;MD17G1206100
1365	MSTRG.131900.1	MD16G1065700;MD16G1065100;MD16G1063800;MD16G1065200;MD16G1063600;MD16G1064700;MD16G1062800;MD16G1064800;MD16G1063100;MD16G1062900;MD16G1062500;MD16G1063500;MD16G1065900;MD16G1065600;MD16G1065000;MD16G1064200;MD16G1065800;MD16G1064600;MD16G1064400;MD16G1066500;MD16G1062600;MD16G1064500;MD16G1066100;MD16G1062700;MD16G1066300;MD16G1064900;MD16G1065500;MD16G1066400;MD16G1064000;MD16G1063200;MD16G1063…
1366	MSTRG.19400.1	MD02G1217900;MD02G1218200;MD02G1217700;MD02G1218800;MD02G1218300;MD02G1218400;MD02G1218900;MD02G1218000;MD02G1218600;MD02G1217800;MD02G1218100;MD02G1218500
1367	MSTRG.29390.12	MD03G1270100;MD03G1270500;MD03G1269000;MD03G1271400;MD03G1271600;MD03G1272200;MD03G1270300;MD03G1272000;MD03G1271900;MD03G1270400;MD03G1269600;MD03G1269800;MD03G1271300;MD03G1270200;MD03G1271500;MD03G1271100;MD03G1268700;MD03G1271200;MD03G1271800;MD03G1269500;MD03G1268800;MD03G1269400;MD03G1269900;MD03G1268900;MD03G1271700;MD03G1272300;MD03G1270800;MD03G1269700
1368	MSTRG.84833.3	MD10G1271200;MD10G1272100;MD10G1272800;MD10G1271700;MD10G1273100;MD10G1272300;MD10G1273000;MD10G1271800;MD10G1271100;MD10G1272000;MD10G1272400;MD10G1271300;MD10G1272600;MD10G1270900;MD10G1270800;MD10G1272900;MD10G1271000;MD10G1272200;MD10G1272700
1369	MSTRG.60228.1	MD07G1245800;MD07G1243900;MD07G1245900;MD07G1245700;MD07G1244900;MD07G1244600;MD07G1245200;MD07G1244200;MD07G1246100;MD07G1244300;MD07G1245100;MD07G1245000;MD07G1244700;MD07G1245400;MD07G1246200;MD07G1244100;MD07G1245500;MD07G1245300;MD07G1244500;MD07G1245600;MD07G1244800;MD07G1244000;MD07G1246000
1370	MSTRG.126263.3	MD15G1317900;MD15G1317300;MD15G1317600;MD15G1318300;MD15G1317200;MD15G1318000;MD15G1317800;MD15G1318100;MD15G1317500;MD15G1318500;MD15G1318400;MD15G1317700;MD15G1317400;MD15G1318200
1371	MSTRG.46015.4	MD05G1333100;MD05G1333700;MD05G1335100;MD05G1334300;MD05G1333200;MD05G1333900;MD05G1334100;MD05G1334600;MD05G1332300;MD05G1332400;MD05G1332700;MD05G1333500;MD05G1333300;MD05G1333800;MD05G1333400;MD05G1332800;MD05G1332900;MD05G1334800;MD05G1333600;MD05G1334700;MD05G1332500;MD05G1334000;MD05G1334200;MD05G1334900;MD05G1334500;MD05G1335000;MD05G1332600
1372	MSTRG.91894.1	MD11G1204800;MD11G1203600;MD11G1203900;MD11G1204200;MD11G1204000;MD11G1204100;MD11G1204400;MD11G1204300;MD11G1204700;MD11G1204600;MD11G1203700
1373	MSTRG.93681.2	MD11G1261800;MD11G1263200;MD11G1262100;MD11G1262700;MD11G1261500;MD11G1262600;MD11G1262900;MD11G1261600;MD11G1262400;MD11G1261900;MD11G1262300;MD11G1262000
1374	MSTRG.132653.1	MD16G1097400;MD16G1095800;MD16G1097000;MD16G1095600;MD16G1097100;MD16G1096800;MD16G1097200;MD16G1096300;MD16G1097800;MD16G1096600;MD16G1097500;MD16G1097700;MD16G1095700;MD16G1097300;MD16G1096000;MD16G1096400;MD16G1096100;MD16G1096200;MD16G1097600;MD16G1096500;MD16G1096700
1375	MSTRG.47978.1	MD06G1039000;MD06G1038700;MD06G1039300;MD06G1038900;MD06G1039500;MD06G1039100;MD06G1038800;MD06G1039400
1376	MSTRG.1063.7	MD00G1034000;MD00G1033900;MD00G1033600;MD00G1033500;MD00G1033400;MD00G1033700;MD00G1034100;MD00G1033800
1377	MSTRG.25111.1	MD03G1129800;MD03G1129600;MD03G1129100;MD03G1129900;MD03G1129300;MD03G1129200;MD03G1129700
1378	MSTRG.37298.2	MD05G1010300;MD05G1010200;MD05G1009100;MD05G1010400;MD05G1009200;MD05G1010600;MD05G1009600;MD05G1010900;MD05G1010700;MD05G1010800;MD05G1010100;MD05G1010000
1379	MSTRG.20279.96	MD02G1254100;MD02G1251400;MD02G1252200;MD02G1253500;MD02G1251700;MD02G1252000;MD02G1253800;MD02G1251800;MD02G1254300;MD02G1251900;MD02G1253700;MD02G1253900;MD02G1253400;MD02G1253600;MD02G1254000;MD02G1254200;MD02G1251500
1380	MSTRG.53203.2	MD06G1221200;MD06G1221700;MD06G1221800;MD06G1223300;MD06G1222300;MD06G1222500;MD06G1222200;MD06G1223200;MD06G1221600;MD06G1220900;MD06G1221500;MD06G1221000;MD06G1223800;MD06G1223900;MD06G1222700;MD06G1221400;MD06G1222900;MD06G1223100;MD06G1223700;MD06G1222400;MD06G1222600;MD06G1222800;MD06G1221300;MD06G1223600;MD06G1222100;MD06G1224000;MD06G1223000;MD06G1223500;MD06G1221100;MD06G1222000
1381	MSTRG.76363.2	MD09G1268100;MD09G1267700;MD09G1268400;MD09G1268700;MD09G1268800;MD09G1268200;MD09G1269500;MD09G1269400;MD09G1268000;MD09G1269000;MD09G1268600;MD09G1269100;MD09G1267900;MD09G1268500;MD09G1268900;MD09G1269200;MD09G1267800;MD09G1268300
1382	MSTRG.113975.1	MD14G1105400;MD14G1104400;MD14G1105100;MD14G1104600;MD14G1105000;MD14G1104700;MD14G1104800;MD14G1104900
1383	MSTRG.67033.1	MD08G1185100;MD08G1185000;MD08G1185200;MD08G1185400;MD08G1184900
1384	MSTRG.129723.6	MD15G1426100;MD15G1425900;MD15G1424900;MD15G1425600;MD15G1425800;MD15G1426000;MD15G1424200;MD15G1425200;MD15G1425500;MD15G1425700;MD15G1425000;MD15G1425300;MD15G1424000;MD15G1425400;MD15G1425100;MD15G1424400;MD15G1424100;MD15G1426200;MD15G1424300;MD15G1424500
1385	MSTRG.56129.23	MD07G1104900;MD07G1104700;MD07G1105400;MD07G1104400;MD07G1105900;MD07G1104300;MD07G1105600;MD07G1104500;MD07G1104600;MD07G1104800;MD07G1105300;MD07G1105500
1386	MSTRG.79809.1	MD10G1089000;MD10G1089300;MD10G1088500;MD10G1089100;MD10G1089200;MD10G1088800;MD10G1089400;MD10G1088600;MD10G1088700
1387	MSTRG.114342.1	MD14G1114100;MD14G1114500;MD14G1114800;MD14G1114400;MD14G1114600;MD14G1114700;MD14G1114200;MD14G1114300
1388	MSTRG.128458.1	MD15G1381900;MD15G1382100;MD15G1381400;MD15G1381800;MD15G1381500;MD15G1381700;MD15G1382000;MD15G1381100;MD15G1382200
1389	MSTRG.137356.4	MD16G1252700
1390	MSTRG.58750.1	MD07G1182000;MD07G1182600;MD07G1182200;MD07G1181500;MD07G1183400;MD07G1181900;MD07G1182700;MD07G1181800;MD07G1182900;MD07G1182100;MD07G1182300;MD07G1183200;MD07G1182500;MD07G1181700;MD07G1182800;MD07G1183600;MD07G1183000;MD07G1183100;MD07G1183300;MD07G1181600;MD07G1183500;MD07G1181400;MD07G1183700
1391	MSTRG.81755.1	MD10G1152100;MD10G1152400;MD10G1151400;MD10G1151500;MD10G1151300;MD10G1151800;MD10G1151900;MD10G1151600;MD10G1151200;MD10G1152300
1392	MSTRG.81314.49	MD10G1137300;MD10G1136400;MD10G1136600;MD10G1137500;MD10G1136700;MD10G1136500;MD10G1137000;MD10G1136800;MD10G1137800;MD10G1138000;MD10G1137100;MD10G1137700;MD10G1137400;MD10G1137200;MD10G1137900
1393	MSTRG.59121.4	MD07G1197600;MD07G1196800;MD07G1196600;MD07G1196400;MD07G1196900;MD07G1198300;MD07G1197900;MD07G1196200;MD07G1198400;MD07G1197000;MD07G1197300;MD07G1197200;MD07G1198100;MD07G1196500;MD07G1196300;MD07G1198000;MD07G1196700;MD07G1197500;MD07G1197800;MD07G1196100;MD07G1197700
1394	MSTRG.87033.9	MD11G1019800;MD11G1018900;MD11G1019700;MD11G1019900;MD11G1019300;MD11G1018600;MD11G1018800;MD11G1019000;MD11G1019500;MD11G1019200;MD11G1018500;MD11G1019100;MD11G1018700;MD11G1018400;MD11G1019400;MD11G1019600
1395	MSTRG.21185.2	MD02G1284400;MD02G1284700;MD02G1284200;MD02G1284900;MD02G1284600;MD02G1285100;MD02G1285400;MD02G1285200;MD02G1284300;MD02G1285000;MD02G1284100;MD02G1285700;MD02G1284800;MD02G1284500;MD02G1285600
1396	MSTRG.41968.1	MD05G1165900;MD05G1166500;MD05G1166100;MD05G1166300;MD05G1166000;MD05G1165800;MD05G1166600;MD05G1166200
1397	MSTRG.82528.3	MD10G1180900;MD10G1180400;MD10G1179400;MD10G1178700;MD10G1178100;MD10G1179900;MD10G1178800;MD10G1178300;MD10G1180600;MD10G1180000;MD10G1180300;MD10G1180700;MD10G1178600;MD10G1179000;MD10G1180500;MD10G1179600;MD10G1179200;MD10G1180100;MD10G1181000;MD10G1179300;MD10G1180800;MD10G1179700;MD10G1179100;MD10G1180200;MD10G1178200;MD10G1178900
1398	MSTRG.8172.1	MD01G1023100;MD01G1023900;MD01G1023800;MD01G1023000;MD01G1024200;MD01G1023400;MD01G1022700;MD01G1023300;MD01G1023500;MD01G1023200;MD01G1024100;MD01G1024000;MD01G1022600;MD01G1022800
1399	MSTRG.43413.2	MD05G1222100;MD05G1220600;MD05G1221500;MD05G1222300;MD05G1220400;MD05G1221000;MD05G1221100;MD05G1220700;MD05G1221200;MD05G1221300;MD05G1220100;MD05G1222200;MD05G1220800;MD05G1220500;MD05G1220200;MD05G1220300
1400	MSTRG.109462.1	MD13G1256800;MD13G1256700
1401	MSTRG.15775.1	MD02G1087300;MD02G1086900;MD02G1088100;MD02G1087200;MD02G1087000;MD02G1088400;MD02G1087800;MD02G1088300;MD02G1087400;MD02G1086800;MD02G1088200;MD02G1087100;MD02G1086400;MD02G1087600;MD02G1087900;MD02G1086700;MD02G1088000;MD02G1086600;MD02G1087700;MD02G1087500;MD02G1086500
1402	MSTRG.1615.2	MD00G1049800;MD00G1050100
1403	MSTRG.86903.26	MD11G1013900;MD11G1014800;MD11G1014100;MD11G1014200;MD11G1014400;MD11G1013800;MD11G1014700;MD11G1013300;MD11G1013200;MD11G1013100;MD11G1014300;MD11G1014000;MD11G1014500;MD11G1013400;MD11G1014600;MD11G1013000
1404	MSTRG.137956.3	MD16G1265900;MD16G1266000;MD16G1266400;MD16G1266300;MD16G1265500;MD16G1266100;MD16G1266200
1405	MSTRG.65010.1	MD08G1123900;MD08G1123700;MD08G1123800
1406	MSTRG.80242.3	MD10G1100700;MD10G1100400;MD10G1100500;MD10G1100800;MD10G1100600;MD10G1100300
1407	MSTRG.142891.1	MD17G1161100;MD17G1160600;MD17G1161000;MD17G1160800;MD17G1160500;MD17G1161200
1408	MSTRG.139130.1	MD17G1010300;MD17G1010600;MD17G1009100;MD17G1010000;MD17G1008500;MD17G1009800;MD17G1010900;MD17G1011700;MD17G1010100;MD17G1009000;MD17G1011000;MD17G1011500;MD17G1010700;MD17G1010400;MD17G1011100;MD17G1009200;MD17G1009900;MD17G1009400;MD17G1008900;MD17G1011300;MD17G1009300;MD17G1011400;MD17G1010800;MD17G1011600;MD17G1008800;MD17G1011200;MD17G1010200;MD17G1009700;MD17G1008700
1409	MSTRG.43798.5	MD05G1237600;MD05G1237200;MD05G1238400;MD05G1239300;MD05G1238100;MD05G1239100;MD05G1237800;MD05G1238600;MD05G1238800;MD05G1238900;MD05G1237700;MD05G1238700;MD05G1239000;MD05G1239400;MD05G1238200;MD05G1238300;MD05G1237300;MD05G1237400;MD05G1238000;MD05G1237500;MD05G1239200;MD05G1239500;MD05G1238500
1410	MSTRG.100963.3	MD12G1201000;MD12G1199300;MD12G1201300;MD12G1199400;MD12G1200300;MD12G1199600;MD12G1199800;MD12G1200000;MD12G1201700;MD12G1199700;MD12G1200600;MD12G1200200;MD12G1201500;MD12G1200400;MD12G1201800;MD12G1200900;MD12G1199900;MD12G1200800;MD12G1201400;MD12G1199500;MD12G1201100;MD12G1200100;MD12G1200500;MD12G1201600;MD12G1201900
1411	MSTRG.30200.1	MD04G1003200;MD04G1003600;MD04G1004400;MD04G1002900;MD04G1004000;MD04G1002700;MD04G1004300;MD04G1004200;MD04G1003500;MD04G1003400;MD04G1002600;MD04G1003700;MD04G1003300;MD04G1004100;MD04G1003000;MD04G1002800;MD04G1003100;MD04G1003800;MD04G1003900
1412	MSTRG.74843.1	MD09G1221500;MD09G1221400;MD09G1221600;MD09G1221300;MD09G1221000;MD09G1220800
1413	MSTRG.9222.1	MD01G1051000;MD01G1050300;MD01G1050200;MD01G1050800;MD01G1050400;MD01G1050900;MD01G1050600;MD01G1050500
1414	MSTRG.77605.2	MD10G1022200;MD10G1022500;MD10G1022400;MD10G1021900;MD10G1022000;MD10G1021400;MD10G1021500;MD10G1021600;MD10G1022300;MD10G1022100;MD10G1021700
1415	MSTRG.122777.1	MD15G1198100;MD15G1197700;MD15G1198300;MD15G1198000;MD15G1197200;MD15G1197100;MD15G1197800;MD15G1198800;MD15G1198900;MD15G1198200;MD15G1197600;MD15G1197900;MD15G1198700;MD15G1198500;MD15G1198600;MD15G1198400;MD15G1197400;MD15G1197500
1416	MSTRG.10293.5	MD01G1088300;MD01G1087900;MD01G1088200;MD01G1088100
1417	MSTRG.40536.2	MD05G1108800;MD05G1109100;MD05G1109000;MD05G1109200;MD05G1108900
1418	MSTRG.76186.1	MD09G1260700;MD09G1260800;MD09G1261400;MD09G1261600;MD09G1261200;MD09G1261800;MD09G1261700;MD09G1260500;MD09G1260600;MD09G1261900;MD09G1261500;MD09G1261100;MD09G1261000;MD09G1260900
1419	MSTRG.46914.1	MD06G1003500;MD06G1004900;MD06G1005400;MD06G1004000;MD06G1003700;MD06G1005200;MD06G1005300;MD06G1005100;MD06G1004200;MD06G1003600;MD06G1004700;MD06G1005000;MD06G1004300;MD06G1004100;MD06G1003900;MD06G1004600;MD06G1003800
1420	MSTRG.7807.1	MD01G1012300;MD01G1013500;MD01G1013300;MD01G1013200;MD01G1012700;MD01G1012800;MD01G1013000;MD01G1012400;MD01G1013400;MD01G1012600
1421	MSTRG.8374.1	MD01G1028300;MD01G1028400;MD01G1028500;MD01G1027700;MD01G1027800;MD01G1027900
1422	MSTRG.83885.1	MD10G1231600;MD10G1230300;MD10G1232200;MD10G1232000;MD10G1230400;MD10G1231900;MD10G1231400;MD10G1231100;MD10G1232300;MD10G1230200;MD10G1231500;MD10G1230700;MD10G1232100;MD10G1231200;MD10G1230800;MD10G1232400;MD10G1230100;MD10G1230900;MD10G1229900;MD10G1231700;MD10G1231300;MD10G1230000;MD10G1231800
1423	MSTRG.4048.1	MD00G1118400;MD00G1118300;MD00G1118200
1424	MSTRG.3750.1	MD00G1110400;MD00G1110500;MD00G1110700;MD00G1109900;MD00G1110300;MD00G1110200
1425	MSTRG.132749.2	MD16G1100400;MD16G1100800;MD16G1100300;MD16G1100200;MD16G1101200;MD16G1098600;MD16G1100500;MD16G1099100;MD16G1099700;MD16G1099500;MD16G1098800;MD16G1099000;MD16G1100100;MD16G1100900;MD16G1101100;MD16G1101400;MD16G1101300;MD16G1098900;MD16G1099800;MD16G1100600;MD16G1100000;MD16G1099400;MD16G1099600;MD16G1098700
1426	MSTRG.20579.1	MD02G1262000;MD02G1261600;MD02G1262200;MD02G1262400;MD02G1261900;MD02G1262600;MD02G1261500;MD02G1261400;MD02G1261700;MD02G1261800;MD02G1262900;MD02G1262300;MD02G1262100;MD02G1262500
1427	MSTRG.26444.1	MD03G1165300;MD03G1165400;MD03G1165700;MD03G1165800;MD03G1165600;MD03G1165500;MD03G1165200
1428	MSTRG.79256.1	MD10G1074700;MD10G1075000;MD10G1075400;MD10G1074600;MD10G1074900;MD10G1075200;MD10G1074300;MD10G1075100;MD10G1075300;MD10G1074500;MD10G1074400
1429	MSTRG.29390.19	MD03G1270300;MD03G1271600;MD03G1272200;MD03G1272000;MD03G1270100;MD03G1270500;MD03G1271400;MD03G1269000;MD03G1270200;MD03G1271300;MD03G1271500;MD03G1271100;MD03G1271900;MD03G1270400;MD03G1269800;MD03G1269600;MD03G1269500;MD03G1268700;MD03G1271200;MD03G1271800;MD03G1269900;MD03G1268900;MD03G1272300;MD03G1269700;MD03G1270800;MD03G1271700;MD03G1269400;MD03G1268800
1430	MSTRG.127123.2	MD15G1343100;MD15G1343600;MD15G1343500;MD15G1343200;MD15G1343300;MD15G1343400
1431	MSTRG.56716.21	MD07G1122800;MD07G1123000;MD07G1122200;MD07G1122300;MD07G1122400;MD07G1122500;MD07G1122900
1432	MSTRG.85270.1	MD10G1287100;MD10G1286300;MD10G1287300;MD10G1287900;MD10G1287200;MD10G1285700;MD10G1286700;MD10G1287600;MD10G1285800;MD10G1288100;MD10G1286500;MD10G1287500;MD10G1287700;MD10G1286200;MD10G1286900;MD10G1287400;MD10G1286600;MD10G1286400;MD10G1287000;MD10G1287800;MD10G1286100;MD10G1288000;MD10G1286800;MD10G1285900
1433	MSTRG.35007.2	MD04G1169200;MD04G1168500;MD04G1168700;MD04G1168900;MD04G1168600;MD04G1169400;MD04G1169100;MD04G1169300;MD04G1169600;MD04G1169500;MD04G1168800
1434	MSTRG.51048.3	MD06G1135100;MD06G1135200;MD06G1134300;MD06G1134500;MD06G1134600;MD06G1135000;MD06G1134700;MD06G1134800
1435	MSTRG.78010.24	MD10G1037400;MD10G1036400;MD10G1036300;MD10G1036500;MD10G1036900;MD10G1036200;MD10G1037300;MD10G1037500;MD10G1037000;MD10G1037200
1436	MSTRG.112758.1	MD14G1067900;MD14G1069000;MD14G1068200;MD14G1067600;MD14G1067400;MD14G1067500;MD14G1068600;MD14G1067700;MD14G1068100;MD14G1068400;MD14G1068900;MD14G1069100;MD14G1068500;MD14G1068000;MD14G1068300;MD14G1068700
1437	MSTRG.79196.3	MD10G1073300;MD10G1072700;MD10G1073200;MD10G1072800;MD10G1073000;MD10G1073400;MD10G1073500
1438	MSTRG.55376.1	MD07G1077300;MD07G1078100;MD07G1078200;MD07G1077600;MD07G1078300;MD07G1077200;MD07G1077700;MD07G1077400;MD07G1078000;MD07G1077500;MD07G1078400;MD07G1077900;MD07G1077800
1439	MSTRG.26592.1	MD03G1169600;MD03G1169900;MD03G1168900;MD03G1169700;MD03G1169400;MD03G1169300;MD03G1169200;MD03G1169100;MD03G1169800
1440	MSTRG.98014.5	MD12G1101800;MD12G1101700;MD12G1102400;MD12G1102100;MD12G1101300;MD12G1102600;MD12G1101400;MD12G1102500;MD12G1102000;MD12G1102700;MD12G1102200;MD12G1101900
1441	MSTRG.28865.1	MD03G1247700;MD03G1247400;MD03G1247500;MD03G1248000;MD03G1247600;MD03G1246900;MD03G1248100;MD03G1247100;MD03G1246700;MD03G1248400;MD03G1247800;MD03G1246800;MD03G1248300;MD03G1248500;MD03G1248200
1442	MSTRG.48441.2	MD06G1052700;MD06G1053200;MD06G1053100;MD06G1052500;MD06G1053000;MD06G1052800;MD06G1052900;MD06G1052400
1443	MSTRG.104248.2	MD13G1076200;MD13G1077800;MD13G1075600;MD13G1075700;MD13G1078400;MD13G1077900;MD13G1075400;MD13G1076800;MD13G1077000;MD13G1078200;MD13G1075300;MD13G1078000;MD13G1077600;MD13G1076100;MD13G1078300;MD13G1077100;MD13G1075900;MD13G1077700;MD13G1076000;MD13G1077300;MD13G1077400;MD13G1078100;MD13G1077200;MD13G1076400
1444	MSTRG.64559.10	MD08G1107900;MD08G1108500;MD08G1107600;MD08G1109000;MD08G1108900;MD08G1109200;MD08G1108400;MD08G1109300;MD08G1107800;MD08G1108300;MD08G1109100;MD08G1108600;MD08G1108700;MD08G1107700;MD08G1109500;MD08G1108100;MD08G1108000;MD08G1108800
1445	MSTRG.1496.1	MD00G1045700;MD00G1045800;MD00G1046000;MD00G1045900
1446	MSTRG.132050.2	MD16G1072500;MD16G1070500;MD16G1072600;MD16G1072400;MD16G1072000;MD16G1071600;MD16G1071700;MD16G1070800;MD16G1072100;MD16G1070200;MD16G1071200;MD16G1071800;MD16G1070400;MD16G1072300;MD16G1072700;MD16G1070700;MD16G1072800;MD16G1071300;MD16G1071900;MD16G1070300;MD16G1070600;MD16G1071400
1447	MSTRG.116992.1	MD14G1216800;MD14G1215700;MD14G1215400;MD14G1215100;MD14G1215600;MD14G1214300;MD14G1216600;MD14G1214400;MD14G1215300;MD14G1215200;MD14G1214800;MD14G1214900;MD14G1216000;MD14G1216500;MD14G1214200;MD14G1216100;MD14G1216300;MD14G1214700;MD14G1215900;MD14G1215000;MD14G1216400;MD14G1215800;MD14G1214500;MD14G1216700
1448	MSTRG.34686.16	MD04G1157500;MD04G1157700;MD04G1157200;MD04G1156300;MD04G1157300;MD04G1156400;MD04G1157400;MD04G1156200;MD04G1156600;MD04G1157000;MD04G1157600
1449	MSTRG.107531.2	MD13G1196600;MD13G1196000;MD13G1196100;MD13G1195800;MD13G1196300;MD13G1196200;MD13G1195500;MD13G1195400;MD13G1195700;MD13G1195900;MD13G1196500;MD13G1195600;MD13G1196400
1450	MSTRG.56149.72	MD07G1107400;MD07G1106800;MD07G1106900;MD07G1106300;MD07G1106400;MD07G1107300;MD07G1106600;MD07G1106500;MD07G1107100;MD07G1106700;MD07G1107600;MD07G1107200
1451	MSTRG.134289.1	MD16G1158000;MD16G1158400;MD16G1157800;MD16G1156900;MD16G1158700;MD16G1157500;MD16G1157600;MD16G1158200;MD16G1157000;MD16G1157900;MD16G1158300;MD16G1157700;MD16G1158500;MD16G1158100;MD16G1157200;MD16G1157300;MD16G1158600;MD16G1157100;MD16G1157400
1452	MSTRG.90490.3	MD11G1167400;MD11G1167600;MD11G1167900
1453	MSTRG.93829.1	MD11G1268600;MD11G1268800;MD11G1268500;MD11G1267900;MD11G1267800;MD11G1268300;MD11G1268900;MD11G1268700;MD11G1268100;MD11G1268400;MD11G1269200
1454	MSTRG.14799.1	MD02G1041700;MD02G1040800;MD02G1040500;MD02G1041200;MD02G1041500;MD02G1041300;MD02G1040000;MD02G1040400;MD02G1040200;MD02G1041600;MD02G1040600;MD02G1039900;MD02G1041000;MD02G1040300;MD02G1041100;MD02G1040100;MD02G1040900
1455	MSTRG.127560.8	MD15G1354400;MD15G1354500;MD15G1354200;MD15G1354300
1456	MSTRG.70.1	MD00G1001500;MD00G1001400;MD00G1000900;MD00G1001200;MD00G1001700;MD00G1001900;MD00G1001800;MD00G1001000;MD00G1001300
1457	MSTRG.99958.1	MD12G1163400;MD12G1163700;MD12G1162800;MD12G1162600;MD12G1164400;MD12G1163200;MD12G1164200;MD12G1163000;MD12G1164300;MD12G1162900;MD12G1163100;MD12G1163500;MD12G1164100;MD12G1162500;MD12G1163600;MD12G1163300;MD12G1163900;MD12G1164000;MD12G1163800
1458	MSTRG.88267.1	MD11G1077100;MD11G1076600;MD11G1075300;MD11G1075000;MD11G1076500;MD11G1076900;MD11G1076200;MD11G1075100;MD11G1077500;MD11G1075400;MD11G1076400;MD11G1077400;MD11G1076800;MD11G1076700;MD11G1077200;MD11G1076300;MD11G1076000;MD11G1077300;MD11G1075200;MD11G1075900;MD11G1075500;MD11G1075600;MD11G1077600;MD11G1077000;MD11G1076100;MD11G1075700
1459	MSTRG.113976.1	MD14G1105100;MD14G1104900;MD14G1104600;MD14G1105400;MD14G1104700;MD14G1105000;MD14G1104800
1460	MSTRG.135190.1	MD16G1187100;MD16G1188000;MD16G1187900;MD16G1187300;MD16G1188300;MD16G1187200;MD16G1188500;MD16G1187700;MD16G1187800;MD16G1188100;MD16G1188200;MD16G1187000;MD16G1187600;MD16G1188400
1461	MSTRG.100613.1	MD12G1187000;MD12G1188000;MD12G1188500;MD12G1187500;MD12G1187200;MD12G1187100;MD12G1188100;MD12G1188200;MD12G1186900;MD12G1188300;MD12G1189000;MD12G1188700;MD12G1186700;MD12G1187300;MD12G1188600;MD12G1186800;MD12G1187900;MD12G1187400;MD12G1188800;MD12G1187600
1462	MSTRG.146016.1	MD17G1260500;MD17G1260700;MD17G1259900;MD17G1260200;MD17G1259800;MD17G1260400;MD17G1261300;MD17G1260900;MD17G1260100;MD17G1260800;MD17G1259600;MD17G1260300;MD17G1259500;MD17G1259400;MD17G1261400;MD17G1260600;MD17G1261100;MD17G1261200;MD17G1261000;MD17G1260000
1463	MSTRG.69341.1	MD09G1016100;MD09G1014700;MD09G1016800;MD09G1015800;MD09G1014900;MD09G1013800;MD09G1015100;MD09G1014200;MD09G1013900;MD09G1015000;MD09G1014400;MD09G1015600;MD09G1016900;MD09G1016600;MD09G1016300;MD09G1013700;MD09G1014600;MD09G1017000;MD09G1016200;MD09G1016000;MD09G1015300;MD09G1014300;MD09G1014000;MD09G1016400;MD09G1015400;MD09G1014100;MD09G1015700;MD09G1017100;MD09G1016700;MD09G1015900;MD09G1014…
1464	MSTRG.100586.11	MD12G1187600;MD12G1187100;MD12G1186500;MD12G1187300;MD12G1186800;MD12G1187900;MD12G1187500;MD12G1187200;MD12G1187400;MD12G1187000;MD12G1186400;MD12G1186300;MD12G1188000;MD12G1186600;MD12G1186700
1465	MSTRG.9562.1	MD01G1064900;MD01G1063000;MD01G1063100;MD01G1063300;MD01G1065200;MD01G1062500;MD01G1063700;MD01G1064800;MD01G1062600;MD01G1065100;MD01G1064700;MD01G1063400;MD01G1063900;MD01G1063800;MD01G1065000;MD01G1062800;MD01G1062700;MD01G1063200;MD01G1064600;MD01G1063600;MD01G1065300;MD01G1062400;MD01G1062300;MD01G1064500
1466	MSTRG.42591.1	MD05G1190700;MD05G1192800;MD05G1191000;MD05G1192400;MD05G1191200;MD05G1192000;MD05G1191400;MD05G1192300;MD05G1192500;MD05G1190400;MD05G1192100;MD05G1191500;MD05G1190600;MD05G1191600;MD05G1191900;MD05G1190800;MD05G1190200;MD05G1190000;MD05G1191300;MD05G1190300;MD05G1192200;MD05G1190500;MD05G1192600;MD05G1190900;MD05G1192700;MD05G1191700
1467	MSTRG.15809.1	MD02G1088900;MD02G1088500;MD02G1090000;MD02G1089800;MD02G1089100;MD02G1090500;MD02G1088700;MD02G1090200;MD02G1089600;MD02G1090100;MD02G1090300;MD02G1089700;MD02G1090600;MD02G1088800;MD02G1089200;MD02G1089900;MD02G1089400;MD02G1089500;MD02G1090400;MD02G1089000
1468	MSTRG.60209.354	MD07G1246800;MD07G1246000;MD07G1244000;MD07G1243800;MD07G1243500;MD07G1243600;MD07G1247200;MD07G1246200;MD07G1244100;MD07G1246100;MD07G1244200;MD07G1244300;MD07G1247000;MD07G1246400;MD07G1243300;MD07G1247100;MD07G1243900;MD07G1243400;MD07G1243700
1469	MSTRG.45950.1	MD05G1329100;MD05G1330500;MD05G1330600;MD05G1327600;MD05G1331100;MD05G1328500;MD05G1327100;MD05G1327900;MD05G1328100;MD05G1328600;MD05G1328400;MD05G1327500;MD05G1330800;MD05G1330900;MD05G1330700;MD05G1328700;MD05G1330200;MD05G1331000;MD05G1330100;MD05G1328900;MD05G1329200;MD05G1329900;MD05G1327700;MD05G1329300;MD05G1328300;MD05G1329800;MD05G1329700;MD05G1328200;MD05G1328000;MD05G1327200;MD05G1330…
1470	MSTRG.113375.1	MD14G1086800;MD14G1087000;MD14G1087100;MD14G1086500;MD14G1086600;MD14G1086700;MD14G1086900
1471	MSTRG.120469.1	MD15G1111300;MD15G1111700;MD15G1109900;MD15G1110100;MD15G1111600;MD15G1109800;MD15G1111800;MD15G1110800;MD15G1110500;MD15G1110200;MD15G1109700;MD15G1111100;MD15G1110900;MD15G1111500;MD15G1111000;MD15G1110300;MD15G1111900;MD15G1110000;MD15G1110400;MD15G1110600
1472	MSTRG.121148.1	MD15G1136300;MD15G1135500;MD15G1135200;MD15G1135100;MD15G1135900;MD15G1134900;MD15G1135400;MD15G1136200;MD15G1136400;MD15G1135600;MD15G1134600;MD15G1134700;MD15G1135300;MD15G1135000;MD15G1136000;MD15G1135800;MD15G1136100;MD15G1134800
1473	MSTRG.109220.1	MD13G1249400;MD13G1250200;MD13G1249000;MD13G1249200;MD13G1249300;MD13G1250100;MD13G1250800;MD13G1251000;MD13G1249100;MD13G1248800;MD13G1250000;MD13G1250700;MD13G1250500;MD13G1249500;MD13G1249800;MD13G1249600;MD13G1250900;MD13G1249900;MD13G1248900
1474	MSTRG.54803.1	MD07G1053700;MD07G1053000;MD07G1052200;MD07G1053800;MD07G1053900;MD07G1053200;MD07G1053300;MD07G1052300;MD07G1054000;MD07G1052400;MD07G1052500;MD07G1053500;MD07G1053100;MD07G1053600
1475	MSTRG.84453.15	MD10G1256200;MD10G1255900;MD10G1256700;MD10G1257600;MD10G1257800;MD10G1257300;MD10G1256000;MD10G1256800;MD10G1256300;MD10G1255600;MD10G1256600;MD10G1256900;MD10G1257000;MD10G1255700;MD10G1255800;MD10G1257700;MD10G1256400;MD10G1256100;MD10G1257500
1476	MSTRG.105138.3	MD13G1108800;MD13G1110000;MD13G1108900;MD13G1109800;MD13G1108700;MD13G1109500;MD13G1108600;MD13G1109700;MD13G1109300;MD13G1109000;MD13G1109900;MD13G1109600;MD13G1109400
1477	MSTRG.4218.3	MD00G1122700;MD00G1122800;MD00G1122300;MD00G1122100;MD00G1122500;MD00G1122600;MD00G1122000
1478	MSTRG.138454.1	MD16G1276600;MD16G1277400;MD16G1276500;MD16G1277000;MD16G1277300;MD16G1276700;MD16G1277100;MD16G1276900
1479	MSTRG.106909.1	MD13G1175100;MD13G1174200;MD13G1174400;MD13G1174300;MD13G1175000;MD13G1175800;MD13G1174100;MD13G1174500;MD13G1175600;MD13G1175700;MD13G1174800;MD13G1174700;MD13G1174600;MD13G1174000;MD13G1175400;MD13G1175500;MD13G1175300
1480	MSTRG.20255.1	MD02G1248900;MD02G1250200;MD02G1248500;MD02G1248400;MD02G1250300;MD02G1249300;MD02G1249400;MD02G1248300;MD02G1248200;MD02G1249200;MD02G1250000;MD02G1248700;MD02G1248800;MD02G1249900
1481	MSTRG.4882.1	MD00G1140400;MD00G1140200;MD00G1140300;MD00G1140500;MD00G1140100;MD00G1140000
1482	MSTRG.79143.1	MD10G1071100;MD10G1071500;MD10G1072000;MD10G1071300;MD10G1071600;MD10G1071400;MD10G1071800;MD10G1071900;MD10G1071200
1483	MSTRG.22816.26	MD03G1039100;MD03G1038300;MD03G1037600;MD03G1037700;MD03G1039000;MD03G1038200;MD03G1037200;MD03G1039200;MD03G1037300;MD03G1039600;MD03G1039500;MD03G1039300;MD03G1038700;MD03G1037900;MD03G1039700;MD03G1038100;MD03G1038400;MD03G1038000;MD03G1038900;MD03G1037400;MD03G1038600;MD03G1039400
1484	MSTRG.110894.1	MD13G1286000;MD13G1285900;MD13G1285800
1485	MSTRG.70566.52	MD09G1070300;MD09G1071500;MD09G1071000;MD09G1072400;MD09G1070800;MD09G1070900;MD09G1071300;MD09G1069800;MD09G1070200;MD09G1071400;MD09G1069700;MD09G1070700;MD09G1071100;MD09G1071200;MD09G1072300;MD09G1071800;MD09G1070000;MD09G1072200;MD09G1070400;MD09G1069900;MD09G1070100;MD09G1071600
1486	MSTRG.143893.2	MD17G1189400;MD17G1189100;MD17G1188800;MD17G1189500;MD17G1190000;MD17G1189200;MD17G1190300;MD17G1190100;MD17G1189000;MD17G1190200;MD17G1188900;MD17G1190400
1487	MSTRG.86543.26	MD10G1341900;MD10G1341300;MD10G1340700;MD10G1339900;MD10G1340100;MD10G1341700;MD10G1340300;MD10G1341200;MD10G1342000;MD10G1339800;MD10G1339600;MD10G1340400;MD10G1340500;MD10G1341000;MD10G1340000;MD10G1341100;MD10G1339400;MD10G1341500;MD10G1340800;MD10G1341600;MD10G1339500;MD10G1339700;MD10G1339300;MD10G1340200;MD10G1341800;MD10G1341400;MD10G1340900
1488	MSTRG.3181.18	MD00G1094100;MD00G1093300;MD00G1092700;MD00G1092600;MD00G1092500;MD00G1093700;MD00G1093000;MD00G1094000;MD00G1093900;MD00G1093200;MD00G1092800;MD00G1093500;MD00G1092900;MD00G1093600;MD00G1093400
1489	MSTRG.21805.1	MD02G1311700;MD02G1312800;MD02G1313100;MD02G1312300;MD02G1312000;MD02G1312900;MD02G1312700;MD02G1312600;MD02G1312100;MD02G1313000;MD02G1312500;MD02G1311900
1490	MSTRG.39300.2	MD05G1070300;MD05G1070100;MD05G1069800;MD05G1069700;MD05G1070000;MD05G1069900;MD05G1070200
1491	MSTRG.44638.1	MD05G1270500;MD05G1270800;MD05G1270400;MD05G1270600;MD05G1271400;MD05G1271200;MD05G1270200;MD05G1271300;MD05G1271500;MD05G1270300;MD05G1270100;MD05G1270700;MD05G1271000;MD05G1270900;MD05G1271100;MD05G1270000
1492	MSTRG.56769.1	MD07G1123900;MD07G1124500;MD07G1124100;MD07G1124400;MD07G1124000;MD07G1123800
1493	MSTRG.94395.1	MD11G1288800;MD11G1287800;MD11G1287300;MD11G1287700;MD11G1288700;MD11G1287500;MD11G1288100;MD11G1287100;MD11G1289000;MD11G1288900;MD11G1289100;MD11G1287900;MD11G1288300;MD11G1287600;MD11G1288000;MD11G1287400;MD11G1287200;MD11G1288500;MD11G1289200;MD11G1288600;MD11G1288400
1494	MSTRG.99548.9	MD12G1147900;MD12G1147200;MD12G1147700;MD12G1147000;MD12G1147300;MD12G1147500;MD12G1147100;MD12G1147400;MD12G1148000
1495	MSTRG.53127.2	MD06G1220200;MD06G1219800;MD06G1219900;MD06G1219700;MD06G1220600;MD06G1218400;MD06G1220000;MD06G1219100;MD06G1220700;MD06G1218600;MD06G1220500;MD06G1219300;MD06G1218800;MD06G1219200;MD06G1220400;MD06G1218300;MD06G1218900;MD06G1220800;MD06G1219600;MD06G1218500
1496	MSTRG.89917.1	MD11G1150300;MD11G1150000;MD11G1150500;MD11G1150200;MD11G1150600;MD11G1150800;MD11G1149600;MD11G1150400;MD11G1150900;MD11G1149900
1497	MSTRG.53943.2	MD07G1008900;MD07G1008600;MD07G1010300;MD07G1009400;MD07G1010200;MD07G1009500;MD07G1008500;MD07G1009300;MD07G1010400;MD07G1009100;MD07G1008700;MD07G1010100;MD07G1009200;MD07G1008400;MD07G1008300;MD07G1009600;MD07G1008800
1498	MSTRG.121324.1	MD15G1141100;MD15G1141300;MD15G1141400;MD15G1142100;MD15G1141900;MD15G1140800;MD15G1140500;MD15G1141700;MD15G1140900;MD15G1142000;MD15G1141800;MD15G1142300;MD15G1141600;MD15G1142400;MD15G1140600;MD15G1142700;MD15G1141500;MD15G1142500;MD15G1142900;MD15G1142600;MD15G1142200;MD15G1142800;MD15G1141200;MD15G1141000
1499	MSTRG.24296.1	MD03G1101500;MD03G1100900;MD03G1100000;MD03G1101700;MD03G1101300;MD03G1101600;MD03G1100100;MD03G1100600;MD03G1100500;MD03G1100400;MD03G1101800;MD03G1099900;MD03G1101200;MD03G1099800;MD03G1100200;MD03G1101000;MD03G1100700
1500	MSTRG.107224.1	MD13G1185400;MD13G1185100;MD13G1185300;MD13G1185800;MD13G1185900;MD13G1186100;MD13G1186400;MD13G1185200;MD13G1186000;MD13G1186600;MD13G1184800;MD13G1186500;MD13G1185500;MD13G1185600;MD13G1184900;MD13G1185700;MD13G1186300
1501	MSTRG.143470.1	MD17G1177200;MD17G1177400;MD17G1177500;MD17G1177600
1502	MSTRG.88283.1	MD11G1077100;MD11G1076600;MD11G1075300;MD11G1076500;MD11G1076200;MD11G1076900;MD11G1076400;MD11G1075400;MD11G1077500;MD11G1076800;MD11G1077400;MD11G1076300;MD11G1077200;MD11G1076700;MD11G1077300;MD11G1076000;MD11G1075900;MD11G1076100;MD11G1077000;MD11G1077600;MD11G1075500;MD11G1075600;MD11G1075700
1503	MSTRG.139590.3	MD17G1034200;MD17G1034300;MD17G1032200;MD17G1033700;MD17G1033100;MD17G1031800;MD17G1032400;MD17G1032000;MD17G1033800;MD17G1031900;MD17G1034000;MD17G1033600;MD17G1033000;MD17G1033200;MD17G1034100;MD17G1032900;MD17G1032300;MD17G1032100;MD17G1034400;MD17G1032700;MD17G1032600;MD17G1032500
1504	MSTRG.75932.1	MD09G1253600;MD09G1253100;MD09G1252200;MD09G1253000;MD09G1253800;MD09G1253700;MD09G1253500;MD09G1253200;MD09G1253400;MD09G1252100;MD09G1252000;MD09G1251900;MD09G1252900;MD09G1253300
1505	MSTRG.14826.1	MD02G1041700;MD02G1042000;MD02G1043300;MD02G1043600;MD02G1043100;MD02G1043500;MD02G1042100;MD02G1043200;MD02G1041500;MD02G1042900;MD02G1043400;MD02G1042600;MD02G1043000;MD02G1042700;MD02G1042400;MD02G1041600;MD02G1042500;MD02G1042800;MD02G1043700;MD02G1042200
1506	MSTRG.27480.2	MD03G1199500;MD03G1200900;MD03G1199100;MD03G1199900;MD03G1199400;MD03G1200000;MD03G1200300;MD03G1200200;MD03G1200700;MD03G1200400;MD03G1200800;MD03G1200600;MD03G1200100;MD03G1199200;MD03G1199600;MD03G1199800;MD03G1201000;MD03G1200500
1507	MSTRG.47101.1	MD06G1009700;MD06G1010000;MD06G1010800;MD06G1010500;MD06G1010600;MD06G1010300;MD06G1009800;MD06G1010200;MD06G1010100;MD06G1010400
1508	MSTRG.33212.22	MD04G1097800;MD04G1097600;MD04G1098000;MD04G1097900
1509	MSTRG.20293.1	MD02G1253400;MD02G1253900;MD02G1253300;MD02G1253500;MD02G1254200;MD02G1253200;MD02G1253600;MD02G1254000;MD02G1253800;MD02G1254300;MD02G1252800;MD02G1252600;MD02G1254100;MD02G1252900;MD02G1252700
1510	MSTRG.71735.7	MD09G1118000;MD09G1118800;MD09G1117500;MD09G1117900;MD09G1119200;MD09G1118600;MD09G1119500;MD09G1118100;MD09G1118300;MD09G1117600;MD09G1118200;MD09G1119400;MD09G1119700;MD09G1119000;MD09G1118400;MD09G1118900;MD09G1117700;MD09G1117800;MD09G1119100;MD09G1118500;MD09G1119600;MD09G1119300
1511	MSTRG.68316.7	MD08G1225500;MD08G1228000;MD08G1227700;MD08G1227300;MD08G1226800;MD08G1227100;MD08G1227900;MD08G1225900;MD08G1226300;MD08G1226100;MD08G1226700;MD08G1225700;MD08G1226000;MD08G1225600;MD08G1227500;MD08G1226900;MD08G1226400;MD08G1225800;MD08G1227200;MD08G1227600;MD08G1227400;MD08G1227000;MD08G1226500;MD08G1228100;MD08G1226600;MD08G1226200;MD08G1227800
1512	MSTRG.39084.2	MD05G1065200
1513	MSTRG.22502.3	MD03G1022200;MD03G1023100;MD03G1022800;MD03G1021100;MD03G1022500;MD03G1022000;MD03G1023000;MD03G1021200;MD03G1022100;MD03G1022600;MD03G1021400;MD03G1021500;MD03G1022700;MD03G1021600;MD03G1021800;MD03G1022900
1514	MSTRG.129527.6	MD15G1417800;MD15G1416900;MD15G1416400;MD15G1418100;MD15G1416700;MD15G1417600;MD15G1417400;MD15G1417700;MD15G1417000;MD15G1416800;MD15G1418000;MD15G1416500;MD15G1417500;MD15G1416600;MD15G1417200;MD15G1417900
1515	MSTRG.79019.11	MD10G1068000;MD10G1069200;MD10G1068300;MD10G1068500;MD10G1068400;MD10G1068100;MD10G1068800;MD10G1069300;MD10G1068200;MD10G1068700;MD10G1069100;MD10G1068600
1516	MSTRG.105511.1	MD13G1123800;MD13G1124100;MD13G1124500;MD13G1125000;MD13G1125600;MD13G1123700;MD13G1125800;MD13G1124800;MD13G1125300;MD13G1125100;MD13G1124000;MD13G1125500;MD13G1124300;MD13G1125400;MD13G1125700;MD13G1124900;MD13G1124200;MD13G1123500;MD13G1123600
1517	MSTRG.129479.7	MD15G1415900;MD15G1415300;MD15G1415400;MD15G1415800;MD15G1415500;MD15G1416000;MD15G1415200;MD15G1415600;MD15G1416200;MD15G1416100;MD15G1415700
1518	MSTRG.15384.51	MD02G1068900;MD02G1069300;MD02G1072000;MD02G1072200;MD02G1069000;MD02G1071600;MD02G1069100;MD02G1069200;MD02G1069500;MD02G1071700;MD02G1072100;MD02G1071800;MD02G1071900;MD02G1072300;MD02G1068800;MD02G1069600
1519	MSTRG.6166.1	MD00G1175000;MD00G1175800;MD00G1174500;MD00G1176000;MD00G1175100;MD00G1175300;MD00G1175600;MD00G1174800;MD00G1175200;MD00G1175500;MD00G1175900;MD00G1175400;MD00G1175700;MD00G1174600;MD00G1174900
1520	MSTRG.13211.2	MD01G1212600;MD01G1212200;MD01G1213400;MD01G1212800;MD01G1212500;MD01G1213100;MD01G1212900;MD01G1212400;MD01G1212300;MD01G1213200;MD01G1212100;MD01G1212000;MD01G1212700;MD01G1211900;MD01G1211500;MD01G1213300;MD01G1211600;MD01G1211800;MD01G1213600;MD01G1213500;MD01G1213000
1521	MSTRG.52024.10	MD06G1175600;MD06G1175800;MD06G1175200;MD06G1176300;MD06G1176400;MD06G1174500;MD06G1175500;MD06G1174800;MD06G1174200;MD06G1176000;MD06G1174600;MD06G1174300;MD06G1175400;MD06G1174700;MD06G1175900;MD06G1174000;MD06G1175000;MD06G1176100;MD06G1174400;MD06G1174100
1522	MSTRG.128092.1	MD15G1370400;MD15G1370500;MD15G1369800;MD15G1370800;MD15G1370700;MD15G1370300;MD15G1370000;MD15G1369900
1523	MSTRG.92206.1	MD11G1214400;MD11G1214100;MD11G1213700;MD11G1213200;MD11G1213600;MD11G1213100;MD11G1213500;MD11G1213300;MD11G1214000;MD11G1214300;MD11G1214800;MD11G1213800;MD11G1213400;MD11G1214500;MD11G1214700
1524	MSTRG.104569.1	MD13G1089700;MD13G1090200;MD13G1091000;MD13G1091200;MD13G1090100;MD13G1090700;MD13G1090400;MD13G1090900;MD13G1091100;MD13G1090000;MD13G1091600;MD13G1089900;MD13G1091800;MD13G1089600;MD13G1090800;MD13G1090600;MD13G1091700;MD13G1091400;MD13G1091500;MD13G1089800;MD13G1091900;MD13G1091300;MD13G1090300
1525	MSTRG.85043.1	MD10G1278800;MD10G1278900;MD10G1279300;MD10G1280400;MD10G1280000;MD10G1279600;MD10G1280200;MD10G1279400;MD10G1280300;MD10G1279900;MD10G1278700;MD10G1280800;MD10G1279500;MD10G1280500;MD10G1280900;MD10G1279800;MD10G1280700;MD10G1280100;MD10G1280600
1526	MSTRG.9566.1	MD01G1063000;MD01G1063100;MD01G1064400;MD01G1064000;MD01G1063300;MD01G1064900;MD01G1064800;MD01G1062600;MD01G1065100;MD01G1065200;MD01G1063700;MD01G1065000;MD01G1063800;MD01G1062800;MD01G1063900;MD01G1064700;MD01G1063400;MD01G1065300;MD01G1064500;MD01G1062700;MD01G1063200;MD01G1063600;MD01G1064600
1527	MSTRG.97448.2	MD12G1087400;MD12G1087100;MD12G1087000;MD12G1087500;MD12G1087300;MD12G1086700;MD12G1086400;MD12G1086800;MD12G1086600;MD12G1086500;MD12G1086900;MD12G1087600
1528	MSTRG.134449.3	MD16G1161600;MD16G1162200;MD16G1161900;MD16G1161200;MD16G1161800;MD16G1162400;MD16G1162000;MD16G1161700;MD16G1162800;MD16G1162300;MD16G1161300;MD16G1161400;MD16G1162100;MD16G1162700;MD16G1161100;MD16G1161500;MD16G1162500
1529	MSTRG.48416.1	MD06G1052300;MD06G1052400;MD06G1053000;MD06G1052500;MD06G1052800;MD06G1052900;MD06G1052700
1530	MSTRG.68106.4	MD08G1220000;MD08G1220600;MD08G1221600;MD08G1220800;MD08G1221200;MD08G1220400;MD08G1221400;MD08G1221500;MD08G1219500;MD08G1219700;MD08G1221100;MD08G1221300;MD08G1220100;MD08G1220900;MD08G1220500;MD08G1219600;MD08G1221000;MD08G1220200;MD08G1219800;MD08G1220700
1531	MSTRG.78559.1	MD10G1057000;MD10G1056700;MD10G1057100;MD10G1056400;MD10G1056800;MD10G1056600;MD10G1055700;MD10G1055900;MD10G1056200;MD10G1056500;MD10G1055800;MD10G1056000;MD10G1056900;MD10G1056300;MD10G1056100
1532	MSTRG.21459.2	MD02G1297700;MD02G1297200;MD02G1297800;MD02G1298200;MD02G1296900;MD02G1296800;MD02G1297000;MD02G1297100;MD02G1298000;MD02G1297600;MD02G1296600;MD02G1296700;MD02G1298100;MD02G1297500;MD02G1297300;MD02G1298300
1533	MSTRG.20264.17	MD02G1252300;MD02G1249600;MD02G1249800;MD02G1251800;MD02G1252400;MD02G1249400;MD02G1251900;MD02G1249500;MD02G1252000;MD02G1252200;MD02G1249700;MD02G1251700
1534	MSTRG.3471.1	MD00G1103300;MD00G1103800;MD00G1103600;MD00G1103500;MD00G1102900;MD00G1103900;MD00G1103700;MD00G1103000;MD00G1103100
1535	MSTRG.120483.2	MD15G1111500;MD15G1110900;MD15G1111000;MD15G1111900;MD15G1110300;MD15G1112300;MD15G1110600;MD15G1110400;MD15G1111600;MD15G1111300;MD15G1111700;MD15G1112100;MD15G1112000;MD15G1110800;MD15G1112200;MD15G1111800;MD15G1110500;MD15G1111100
1536	MSTRG.135190.35	MD16G1188300;MD16G1187300;MD16G1188000;MD16G1187900;MD16G1187100;MD16G1188500;MD16G1187200;MD16G1187400;MD16G1187800;MD16G1187700;MD16G1188400;MD16G1187600;MD16G1187000;MD16G1188100;MD16G1188200
1537	MSTRG.62636.1	MD08G1033500;MD08G1033000;MD08G1035200;MD08G1033900;MD08G1034000;MD08G1033600;MD08G1033200;MD08G1035500;MD08G1034400;MD08G1034600;MD08G1035300;MD08G1033700;MD08G1034500;MD08G1035000;MD08G1034800;MD08G1033300;MD08G1032800;MD08G1033800;MD08G1034200;MD08G1034300;MD08G1033100;MD08G1032900;MD08G1033400;MD08G1035400
1538	MSTRG.38589.1	MD05G1050200;MD05G1050600;MD05G1050800;MD05G1050100;MD05G1050400;MD05G1049900;MD05G1050500;MD05G1049800;MD05G1050700;MD05G1049700;MD05G1050000
1539	MSTRG.77748.44	MD10G1028000;MD10G1027700;MD10G1027400;MD10G1027900;MD10G1028200;MD10G1028400;MD10G1027800;MD10G1028300
1540	MSTRG.110225.1	MD13G1272200;MD13G1272100;MD13G1272000;MD13G1272400;MD13G1272500
1541	MSTRG.21200.1	MD02G1286200;MD02G1286000;MD02G1286600;MD02G1286400;MD02G1285100;MD02G1286500;MD02G1285800;MD02G1285400;MD02G1286100;MD02G1285200;MD02G1286300;MD02G1285700;MD02G1285600
1542	MSTRG.15674.1	MD02G1085000;MD02G1084700;MD02G1083700;MD02G1083800;MD02G1084300;MD02G1084200;MD02G1084500;MD02G1085400;MD02G1085200;MD02G1083900;MD02G1085100;MD02G1084000;MD02G1084600;MD02G1085500;MD02G1085300;MD02G1084100;MD02G1084400;MD02G1084800
1543	MSTRG.139001.1	MD17G1003400;MD17G1004800;MD17G1004000;MD17G1004400;MD17G1003700;MD17G1003900;MD17G1004100;MD17G1003600;MD17G1003500;MD17G1003100;MD17G1005800;MD17G1005100;MD17G1003200;MD17G1005200;MD17G1003000;MD17G1004300;MD17G1003800;MD17G1004500;MD17G1003300;MD17G1004200
1544	MSTRG.112941.1	MD14G1074600;MD14G1075700;MD14G1075200;MD14G1075500;MD14G1074900;MD14G1074800;MD14G1075400;MD14G1075100;MD14G1075600
1545	MSTRG.110423.11	MD13G1276500;MD13G1277300;MD13G1276300;MD13G1276600;MD13G1277100;MD13G1277200;MD13G1276400
1546	MSTRG.145334.2	MD17G1239600;MD17G1239500;MD17G1238700;MD17G1238800;MD17G1240000;MD17G1238900;MD17G1238100;MD17G1239800;MD17G1239200;MD17G1238200;MD17G1238500;MD17G1239900;MD17G1238400;MD17G1239700;MD17G1238600;MD17G1239300;MD17G1239100;MD17G1239400
1547	MSTRG.122697.19	MD15G1194000;MD15G1194400;MD15G1193900;MD15G1193600;MD15G1194600;MD15G1195000;MD15G1194300;MD15G1194500;MD15G1195100;MD15G1193700;MD15G1194100;MD15G1193800
1548	MSTRG.37863.1	MD05G1027800;MD05G1027500;MD05G1027300;MD05G1027900;MD05G1028000;MD05G1027700;MD05G1027600;MD05G1027400
1549	MSTRG.41256.2	MD05G1131700;MD05G1132200;MD05G1132000;MD05G1131900;MD05G1131800;MD05G1132300;MD05G1132500;MD05G1132400;MD05G1132900;MD05G1132700;MD05G1132600;MD05G1132800
1550	MSTRG.28350.2	MD03G1230000;MD03G1229000;MD03G1229200;MD03G1230200;MD03G1229600;MD03G1229800;MD03G1229900;MD03G1230100;MD03G1229100;MD03G1230600;MD03G1228500;MD03G1229700;MD03G1230700;MD03G1230300
1551	MSTRG.39932.9	MD05G1090100;MD05G1089800;MD05G1090600;MD05G1089900;MD05G1089700
1552	MSTRG.32749.1	MD04G1088100
1553	MSTRG.86882.1	MD11G1012300;MD11G1011000;MD11G1010500;MD11G1012400;MD11G1011600;MD11G1010000;MD11G1012500;MD11G1012800;MD11G1012100;MD11G1009900;MD11G1012200;MD11G1012900;MD11G1011200;MD11G1010700;MD11G1011400;MD11G1010300;MD11G1012600;MD11G1011100;MD11G1010800;MD11G1012700;MD11G1010600;MD11G1011300;MD11G1010900;MD11G1010200;MD11G1011700
1554	MSTRG.113410.1	MD14G1088100;MD14G1087800;MD14G1087700;MD14G1088000;MD14G1088200;MD14G1087500;MD14G1087900
1555	MSTRG.75691.1	MD09G1242500;MD09G1242400;MD09G1243300;MD09G1242600;MD09G1242100;MD09G1243100;MD09G1242000;MD09G1241700;MD09G1242200;MD09G1241900;MD09G1242300;MD09G1243000;MD09G1242800;MD09G1242900;MD09G1241800
1556	MSTRG.86411.1	MD10G1333300;MD10G1333000;MD10G1334300;MD10G1332800;MD10G1333700;MD10G1333200;MD10G1333800;MD10G1333600;MD10G1333400;MD10G1332600;MD10G1333500;MD10G1333100;MD10G1333900;MD10G1332700;MD10G1332900;MD10G1334000
1557	MSTRG.144385.9	MD17G1205700;MD17G1207300;MD17G1206100;MD17G1206300;MD17G1207100;MD17G1206900;MD17G1207700;MD17G1206800;MD17G1205600;MD17G1206200;MD17G1205800;MD17G1205200;MD17G1207500;MD17G1207200;MD17G1205300;MD17G1205900;MD17G1205400;MD17G1207400
1558	MSTRG.48148.1	MD06G1043900;MD06G1044200;MD06G1044000;MD06G1043800;MD06G1044300;MD06G1044100;MD06G1044400
1559	MSTRG.54120.1	MD07G1018000;MD07G1017200;MD07G1018100;MD07G1017100;MD07G1018500;MD07G1017000;MD07G1017300;MD07G1018800;MD07G1019800;MD07G1019900;MD07G1019200;MD07G1017700;MD07G1019500;MD07G1017400;MD07G1019300;MD07G1017800;MD07G1018400;MD07G1019600;MD07G1017900;MD07G1017500;MD07G1018700;MD07G1019700;MD07G1019400;MD07G1017600;MD07G1018900;MD07G1018200;MD07G1018300
1560	MSTRG.140967.1	MD17G1090100;MD17G1090300;MD17G1090900;MD17G1090800;MD17G1090200;MD17G1090000;MD17G1091000;MD17G1090400;MD17G1090600
1561	MSTRG.21728.3	MD02G1309700;MD02G1308300;MD02G1309200;MD02G1308700;MD02G1308400;MD02G1309100;MD02G1309800;MD02G1309400;MD02G1308800;MD02G1308500;MD02G1309600;MD02G1308200;MD02G1309300;MD02G1308900;MD02G1308600;MD02G1309500
1562	MSTRG.79583.1	MD10G1082200;MD10G1082300;MD10G1083200;MD10G1083300;MD10G1083100;MD10G1083500;MD10G1082800;MD10G1083700;MD10G1082700;MD10G1082600;MD10G1082400;MD10G1082500;MD10G1083000;MD10G1083600;MD10G1083800
1563	MSTRG.34725.8	MD04G1159400;MD04G1159100;MD04G1159000;MD04G1159500;MD04G1159700;MD04G1159300;MD04G1159200
1564	MSTRG.3953.4	MD00G1115500;MD00G1115600;MD00G1115900;MD00G1115800;MD00G1116000;MD00G1114800;MD00G1116200;MD00G1114900;MD00G1115300;MD00G1115200;MD00G1114700;MD00G1116100;MD00G1115700;MD00G1116300;MD00G1115000;MD00G1115400;MD00G1115100
1565	MSTRG.112150.1	MD14G1046300;MD14G1047900;MD14G1046700;MD14G1046200;MD14G1047400;MD14G1046000;MD14G1046500;MD14G1047000;MD14G1046900;MD14G1047200;MD14G1047700;MD14G1047300;MD14G1047800;MD14G1046400;MD14G1047100
1566	MSTRG.132024.1	MD16G1070500;MD16G1069400;MD16G1071600;MD16G1069200;MD16G1072000;MD16G1068900;MD16G1069300;MD16G1069500;MD16G1069900;MD16G1071700;MD16G1069000;MD16G1069600;MD16G1070000;MD16G1071800;MD16G1071200;MD16G1070400;MD16G1069800;MD16G1070800;MD16G1070200;MD16G1072100;MD16G1071300;MD16G1070300;MD16G1071900;MD16G1069100;MD16G1071400;MD16G1070600
1567	MSTRG.126614.17	MD15G1327100;MD15G1327800;MD15G1327200;MD15G1327400;MD15G1327300;MD15G1327700
1568	MSTRG.50231.4	MD06G1104700;MD06G1104500;MD06G1105400;MD06G1105600;MD06G1104800;MD06G1104600;MD06G1104300;MD06G1105500;MD06G1105300
1569	MSTRG.87448.2	MD11G1038500;MD11G1039000;MD11G1037700;MD11G1039500;MD11G1038200;MD11G1038300;MD11G1038000;MD11G1039100;MD11G1037800;MD11G1037900;MD11G1038100;MD11G1038400;MD11G1038900;MD11G1039300;MD11G1039200
1570	MSTRG.24295.8	MD03G1099800;MD03G1100200;MD03G1100700;MD03G1101000;MD03G1101700;MD03G1101600;MD03G1099700;MD03G1101300;MD03G1100000;MD03G1100900;MD03G1101500;MD03G1101200;MD03G1099900;MD03G1101800;MD03G1100400;MD03G1100600;MD03G1100100;MD03G1100500
1571	MSTRG.31628.1	MD04G1055000;MD04G1054800;MD04G1054700;MD04G1055500;MD04G1055700;MD04G1055400;MD04G1055300;MD04G1054900;MD04G1055600;MD04G1055100
1572	MSTRG.42806.1	MD05G1199900;MD05G1199700;MD05G1199400;MD05G1198900;MD05G1200200;MD05G1200600;MD05G1199600;MD05G1199200;MD05G1199500;MD05G1200000;MD05G1199300;MD05G1199100;MD05G1198800;MD05G1200300;MD05G1200100;MD05G1198700;MD05G1199000;MD05G1200700
1573	MSTRG.113423.1	MD14G1088100;MD14G1087800;MD14G1087700;MD14G1088900;MD14G1088500;MD14G1088400;MD14G1088200;MD14G1087900;MD14G1088300;MD14G1088800;MD14G1088000
1574	MSTRG.101462.13	MD12G1221400;MD12G1221800;MD12G1222100;MD12G1222300;MD12G1221500;MD12G1221100;MD12G1222000;MD12G1221900;MD12G1222200;MD12G1221700;MD12G1221200;MD12G1221300
1575	MSTRG.2148.3	MD00G1066700;MD00G1066600;MD00G1066800;MD00G1067200;MD00G1067000;MD00G1067100;MD00G1067300
1576	MSTRG.109616.3	MD13G1258700;MD13G1258800
1577	MSTRG.91673.16	MD11G1197600;MD11G1197400;MD11G1196800;MD11G1197200;MD11G1197500;MD11G1197100;MD11G1197000;MD11G1196700
1578	MSTRG.50887.1	MD06G1131100;MD06G1130300;MD06G1130400;MD06G1130800;MD06G1130600;MD06G1130900;MD06G1130200;MD06G1130000;MD06G1129400;MD06G1129500;MD06G1129300;MD06G1130100;MD06G1130700;MD06G1131200;MD06G1130500;MD06G1129700;MD06G1131000
1579	MSTRG.7779.3	MD01G1012000;MD01G1011700;MD01G1011800
1580	MSTRG.74419.4	MD09G1211700;MD09G1211800;MD09G1211500;MD09G1211600;MD09G1212000;MD09G1211300;MD09G1210900;MD09G1211100;MD09G1211900;MD09G1211000
1581	MSTRG.85784.2	MD10G1306200;MD10G1307600;MD10G1305700;MD10G1305000;MD10G1305900;MD10G1307700;MD10G1306800;MD10G1307000;MD10G1304800;MD10G1306100;MD10G1306300;MD10G1305300;MD10G1305200;MD10G1305100;MD10G1305800;MD10G1305500;MD10G1307500;MD10G1306700;MD10G1307200;MD10G1307300;MD10G1305400;MD10G1307800;MD10G1306900;MD10G1306600;MD10G1306000;MD10G1307400
1582	MSTRG.71565.2	MD09G1112000;MD09G1111500;MD09G1113200;MD09G1112700;MD09G1111900;MD09G1112200;MD09G1112500;MD09G1111400;MD09G1111800;MD09G1112600;MD09G1111600;MD09G1112400;MD09G1113000;MD09G1111700;MD09G1112900;MD09G1113400;MD09G1112800;MD09G1112300;MD09G1111300;MD09G1112100;MD09G1113300;MD09G1113100
1583	MSTRG.56129.41	MD07G1105300;MD07G1105500;MD07G1104600;MD07G1104800;MD07G1104500;MD07G1105600;MD07G1104300;MD07G1104400;MD07G1105900;MD07G1105400;MD07G1104900;MD07G1104700
1584	MSTRG.138614.2	MD16G1282400;MD16G1282200;MD16G1281600;MD16G1281800;MD16G1282100;MD16G1281300;MD16G1281900;MD16G1281700;MD16G1282300;MD16G1281400;MD16G1282000
1585	MSTRG.135042.1	MD16G1181900;MD16G1182400;MD16G1181700;MD16G1183100;MD16G1182600;MD16G1182000;MD16G1182700;MD16G1183400;MD16G1182500;MD16G1182800;MD16G1181800;MD16G1181500;MD16G1182200;MD16G1182900;MD16G1182100;MD16G1181600;MD16G1182300
1586	MSTRG.42597.1	MD05G1191600;MD05G1191900;MD05G1192900;MD05G1190600;MD05G1190300;MD05G1191300;MD05G1190200;MD05G1190800;MD05G1190500;MD05G1192600;MD05G1193100;MD05G1191100;MD05G1192200;MD05G1191700;MD05G1190900;MD05G1192700;MD05G1192000;MD05G1192400;MD05G1191200;MD05G1190700;MD05G1191000;MD05G1192800;MD05G1193000;MD05G1190400;MD05G1192100;MD05G1191500;MD05G1192300;MD05G1192500
1587	MSTRG.23748.2	MD03G1080100;MD03G1080000;MD03G1081200;MD03G1080600;MD03G1080700;MD03G1081900;MD03G1081100;MD03G1082000;MD03G1079600;MD03G1081600;MD03G1081300;MD03G1079800;MD03G1080200;MD03G1081800;MD03G1079700;MD03G1081000;MD03G1080800;MD03G1081500;MD03G1081700;MD03G1080900;MD03G1079900
1588	MSTRG.46196.1	MD05G1340000;MD05G1341600;MD05G1341800;MD05G1342100;MD05G1341100;MD05G1340900;MD05G1340100;MD05G1341900;MD05G1341200;MD05G1340300;MD05G1340700;MD05G1342000;MD05G1340800;MD05G1341000;MD05G1340400;MD05G1341700;MD05G1341400;MD05G1341300;MD05G1341500;MD05G1339700;MD05G1340500;MD05G1340200;MD05G1340600
1589	MSTRG.29923.15	MD03G1293800;MD03G1293900;MD03G1295700;MD03G1294900;MD03G1294700;MD03G1295100;MD03G1294500;MD03G1296200;MD03G1294800;MD03G1296100;MD03G1295600;MD03G1293600;MD03G1295800;MD03G1296000;MD03G1295900;MD03G1295400;MD03G1295300;MD03G1294600;MD03G1293400;MD03G1294200;MD03G1294400;MD03G1294300;MD03G1294100;MD03G1293700;MD03G1295200
1590	MSTRG.40940.1	MD05G1122500;MD05G1123400;MD05G1122400;MD05G1123100;MD05G1121700;MD05G1122200;MD05G1121900;MD05G1122600;MD05G1122900;MD05G1123200;MD05G1122000;MD05G1122800;MD05G1123600;MD05G1123300;MD05G1122300;MD05G1122100;MD05G1122700;MD05G1123500;MD05G1121500;MD05G1121800;MD05G1123700;MD05G1123000
1591	MSTRG.129618.1	MD15G1420700;MD15G1419700;MD15G1420100;MD15G1420200;MD15G1421300;MD15G1419800;MD15G1419900;MD15G1420800;MD15G1420300;MD15G1420900;MD15G1421100;MD15G1420000;MD15G1420600
1592	MSTRG.72921.1	MD09G1167300;MD09G1166900;MD09G1166700;MD09G1166600;MD09G1167700;MD09G1167400;MD09G1167600;MD09G1167200;MD09G1166300;MD09G1167100;MD09G1167900;MD09G1167800;MD09G1167500;MD09G1167000;MD09G1166500;MD09G1166400;MD09G1166200;MD09G1166800
1593	MSTRG.64205.1	MD08G1096000;MD08G1096400;MD08G1095800;MD08G1095500;MD08G1095600;MD08G1095000;MD08G1095300;MD08G1095700;MD08G1096500;MD08G1095100;MD08G1096300;MD08G1095400;MD08G1096800;MD08G1097000;MD08G1095900;MD08G1096600;MD08G1096700;MD08G1094900
1594	MSTRG.78508.1	MD10G1055100;MD10G1055000;MD10G1055300;MD10G1054700;MD10G1054300;MD10G1055500;MD10G1055200;MD10G1054600;MD10G1054900;MD10G1054200;MD10G1055400;MD10G1054400;MD10G1054800
1595	MSTRG.146540.1	MD17G1282900;MD17G1283500;MD17G1284100;MD17G1283600;MD17G1283800;MD17G1283400;MD17G1283200;MD17G1284000;MD17G1282600;MD17G1283300;MD17G1282800;MD17G1282700;MD17G1284200;MD17G1283900;MD17G1283700
1596	MSTRG.5097.14	MD00G1146200;MD00G1146300;MD00G1146600;MD00G1145600;MD00G1145700
1597	MSTRG.124738.1	MD15G1267800;MD15G1267700;MD15G1268000;MD15G1268400;MD15G1267900
1598	MSTRG.103911.2	MD13G1063200;MD13G1061400;MD13G1063300;MD13G1062200;MD13G1061300;MD13G1064800;MD13G1061600;MD13G1064500;MD13G1062300;MD13G1064000;MD13G1062100;MD13G1062900;MD13G1063700;MD13G1061500;MD13G1063400;MD13G1062600;MD13G1062700;MD13G1063600;MD13G1061800;MD13G1062500;MD13G1063100;MD13G1062400;MD13G1064200;MD13G1063900;MD13G1064400;MD13G1062800;MD13G1062000;MD13G1064600;MD13G1064300;MD13G1064700;MD13G1064…
1599	MSTRG.90044.1	MD11G1155100;MD11G1154500;MD11G1155700;MD11G1154600;MD11G1154700;MD11G1155900;MD11G1156100;MD11G1155000;MD11G1154900;MD11G1156000;MD11G1155800
1600	MSTRG.101646.1	MD12G1229200;MD12G1228900;MD12G1228700;MD12G1230900;MD12G1228500;MD12G1230000;MD12G1229300;MD12G1230700;MD12G1229000;MD12G1229400;MD12G1230600;MD12G1229900;MD12G1230300;MD12G1228800;MD12G1229500;MD12G1228600;MD12G1229600;MD12G1229700;MD12G1229100;MD12G1230800;MD12G1230100;MD12G1230200
1601	MSTRG.110437.2	MD13G1277300;MD13G1277200;MD13G1277900;MD13G1277100;MD13G1278000
1602	MSTRG.15108.1	MD02G1060200;MD02G1057600;MD02G1057700;MD02G1058200;MD02G1059400;MD02G1058400;MD02G1059200;MD02G1058100;MD02G1058900;MD02G1057400;MD02G1058300;MD02G1057300;MD02G1058500;MD02G1059900;MD02G1058700;MD02G1059700;MD02G1059000;MD02G1059600;MD02G1058600;MD02G1058800;MD02G1060000;MD02G1059500;MD02G1060100;MD02G1057500;MD02G1058000;MD02G1057800;MD02G1057900;MD02G1059300
1603	MSTRG.24423.9	MD03G1106800;MD03G1106400;MD03G1106900;MD03G1107400;MD03G1107300;MD03G1107100;MD03G1107600;MD03G1107200;MD03G1106500;MD03G1107500;MD03G1106600;MD03G1107700;MD03G1106700
1604	MSTRG.71665.1	MD09G1115400;MD09G1115900;MD09G1115300;MD09G1116700;MD09G1116400;MD09G1116500;MD09G1117100;MD09G1117500;MD09G1116900;MD09G1117000;MD09G1116300;MD09G1115500;MD09G1116600;MD09G1116000;MD09G1116100;MD09G1117400;MD09G1117300;MD09G1117200;MD09G1115600;MD09G1115700;MD09G1115800;MD09G1116800
1605	MSTRG.104180.1	MD13G1074800;MD13G1075300;MD13G1074100;MD13G1075400;MD13G1075600;MD13G1074000;MD13G1073200;MD13G1073400;MD13G1073100;MD13G1075200;MD13G1074900;MD13G1074300;MD13G1074500;MD13G1073900;MD13G1074700;MD13G1073800;MD13G1073300;MD13G1074600;MD13G1073600;MD13G1075000;MD13G1073700;MD13G1074400;MD13G1073500;MD13G1074200
1606	MSTRG.94847.1	MD11G1308900;MD11G1308400;MD11G1310200;MD11G1308100;MD11G1307900;MD11G1307600;MD11G1307500;MD11G1309600;MD11G1308300;MD11G1307800;MD11G1309500;MD11G1308800;MD11G1308600;MD11G1308700;MD11G1307700;MD11G1309800;MD11G1307400;MD11G1310000;MD11G1310400;MD11G1309200;MD11G1309300;MD11G1309700;MD11G1309900;MD11G1308200;MD11G1307300;MD11G1308500;MD11G1308000;MD11G1309400;MD11G1309100;MD11G1310300;MD11G1309…
1607	MSTRG.68970.1	MD09G1000800;MD09G1000100;MD09G1000600;MD09G1000400;MD09G1000200;MD09G1000900;MD09G1000500;MD09G1000300
1608	MSTRG.66858.1	MD08G1179700;MD08G1180200;MD08G1180400;MD08G1180300;MD08G1179900;MD08G1180000;MD08G1180100;MD08G1179500;MD08G1179600
1609	MSTRG.108094.2	MD13G1212800;MD13G1212200;MD13G1211700;MD13G1212600;MD13G1212100;MD13G1212300;MD13G1212500;MD13G1211900;MD13G1212000;MD13G1212700;MD13G1211800;MD13G1212400
1610	MSTRG.82199.1	MD10G1167800;MD10G1168200;MD10G1167700;MD10G1168000;MD10G1167900
1611	MSTRG.119456.2	MD15G1069900;MD15G1070600;MD15G1066700;MD15G1069200;MD15G1066800;MD15G1068800;MD15G1066900;MD15G1068500;MD15G1066500;MD15G1067100;MD15G1067900;MD15G1069000;MD15G1070300;MD15G1068900;MD15G1068600;MD15G1069100;MD15G1070100;MD15G1068100;MD15G1068000;MD15G1068400;MD15G1070400;MD15G1069800;MD15G1067800;MD15G1066600;MD15G1067200;MD15G1068200;MD15G1070200;MD15G1067500;MD15G1067000;MD15G1070000;MD15G1068…
1612	MSTRG.83925.5	MD10G1232800;MD10G1232400;MD10G1232500;MD10G1231800;MD10G1231300;MD10G1231700;MD10G1233600;MD10G1232300;MD10G1232700;MD10G1231200;MD10G1232100;MD10G1233500;MD10G1231500;MD10G1233300;MD10G1232900;MD10G1233200;MD10G1231400;MD10G1231900;MD10G1233100;MD10G1233000;MD10G1231600;MD10G1232000;MD10G1233400;MD10G1232200;MD10G1232600
1613	MSTRG.52363.1	MD06G1189400;MD06G1189500;MD06G1189900;MD06G1189800;MD06G1188500;MD06G1190900;MD06G1188400;MD06G1190500;MD06G1189300;MD06G1191100;MD06G1191000;MD06G1190600;MD06G1188700;MD06G1190200;MD06G1191300;MD06G1189700;MD06G1189200;MD06G1189100;MD06G1188300;MD06G1188900;MD06G1190400;MD06G1189000;MD06G1190700;MD06G1188800;MD06G1190100;MD06G1190000;MD06G1188600
1614	MSTRG.110912.3	MD14G1000500;MD14G1000700;MD14G1000600;MD14G1000100;MD14G1000200
1615	MSTRG.30526.1	MD04G1013800;MD04G1014300;MD04G1014800;MD04G1015000;MD04G1014700;MD04G1014900;MD04G1015700;MD04G1013500;MD04G1014400;MD04G1015300;MD04G1013700;MD04G1013400;MD04G1014000;MD04G1014600;MD04G1014500;MD04G1013600;MD04G1015600;MD04G1014200;MD04G1014100;MD04G1013900;MD04G1015100
1616	MSTRG.136728.1	MD16G1236300;MD16G1236500;MD16G1236400
1617	MSTRG.76171.2	MD09G1260400;MD09G1261200;MD09G1260700;MD09G1260800;MD09G1261400;MD09G1260600;MD09G1260500;MD09G1260200;MD09G1261500;MD09G1260100;MD09G1261000;MD09G1260900;MD09G1261100
1618	MSTRG.4693.1	MD00G1135400;MD00G1135500
1619	MSTRG.63000.2	MD08G1046900;MD08G1047100;MD08G1047200;MD08G1047500;MD08G1048100;MD08G1048200;MD08G1047600;MD08G1047800;MD08G1047400;MD08G1047900;MD08G1048000;MD08G1046700;MD08G1047700;MD08G1046800;MD08G1047000;MD08G1047300
1620	MSTRG.78447.1	MD10G1053300;MD10G1053100;MD10G1053200;MD10G1052800;MD10G1052500;MD10G1052700;MD10G1052600;MD10G1053000
1621	MSTRG.137264.4	MD16G1250300;MD16G1249600;MD16G1249500;MD16G1250400;MD16G1250600;MD16G1250900;MD16G1250800;MD16G1250100;MD16G1250200;MD16G1249800;MD16G1250700;MD16G1250000;MD16G1249900;MD16G1250500;MD16G1249400;MD16G1249700
1622	MSTRG.8215.1	MD01G1024700;MD01G1024900;MD01G1024400;MD01G1024600;MD01G1024500
1623	MSTRG.65032.5	MD08G1124100;MD08G1125000;MD08G1124700;MD08G1124400;MD08G1124800;MD08G1124500;MD08G1123900;MD08G1124900;MD08G1124000;MD08G1125100;MD08G1123800;MD08G1124200;MD08G1124600
1624	MSTRG.43544.5	MD05G1226500;MD05G1227100;MD05G1226800;MD05G1226400;MD05G1226200;MD05G1226900;MD05G1226300;MD05G1226600;MD05G1227000;MD05G1226700
1625	MSTRG.30065.1	MD03G1299200;MD03G1298700;MD03G1299000;MD03G1298900;MD03G1298600;MD03G1298800
1626	MSTRG.51709.2	MD06G1163700;MD06G1165400;MD06G1165300;MD06G1164500;MD06G1166300;MD06G1165700;MD06G1165200;MD06G1166200;MD06G1165900;MD06G1165500;MD06G1163900;MD06G1166100;MD06G1163500;MD06G1164700;MD06G1164000;MD06G1163600;MD06G1164900;MD06G1165100;MD06G1164200;MD06G1166000;MD06G1164400;MD06G1165600;MD06G1164100;MD06G1163800;MD06G1164800;MD06G1164300;MD06G1164600;MD06G1165800
1627	MSTRG.65728.1	MD08G1147200;MD08G1148300;MD08G1147100;MD08G1148900;MD08G1147500;MD08G1148800;MD08G1147800;MD08G1147400;MD08G1148700;MD08G1148100;MD08G1148200;MD08G1147000;MD08G1147300;MD08G1148500
1628	MSTRG.61340.1	MD07G1292400;MD07G1290700;MD07G1291000;MD07G1291900;MD07G1292000;MD07G1292300;MD07G1291400;MD07G1292100;MD07G1291100;MD07G1291800;MD07G1292200;MD07G1291200;MD07G1291300
1629	MSTRG.74373.1	MD09G1211100;MD09G1210500;MD09G1210700;MD09G1210600;MD09G1211000;MD09G1210900;MD09G1210800
1630	MSTRG.28195.8	MD03G1223700;MD03G1223800;MD03G1223500;MD03G1223900;MD03G1224000;MD03G1223600;MD03G1222900;MD03G1223400;MD03G1224100;MD03G1223300
1631	MSTRG.66243.1	MD08G1161200;MD08G1161700;MD08G1161100;MD08G1161600
1632	MSTRG.64631.2	MD08G1110500;MD08G1111500;MD08G1111400;MD08G1111200;MD08G1110600;MD08G1110400;MD08G1111000;MD08G1110000;MD08G1109900;MD08G1110100;MD08G1111100;MD08G1110700;MD08G1111300;MD08G1111600;MD08G1110200;MD08G1111700;MD08G1110300
1633	MSTRG.25297.1	MD03G1135800;MD03G1136100;MD03G1136600;MD03G1136800;MD03G1135900;MD03G1136300;MD03G1136200;MD03G1136700;MD03G1137000;MD03G1136500;MD03G1136900;MD03G1136000
1634	MSTRG.122258.1	MD15G1176800;MD15G1177300;MD15G1175900;MD15G1176900;MD15G1176300;MD15G1175700;MD15G1176500;MD15G1177200;MD15G1177100;MD15G1176400;MD15G1176700;MD15G1177000;MD15G1176200;MD15G1176600;MD15G1176000
1635	MSTRG.116192.1	MD14G1181000;MD14G1182100;MD14G1181800;MD14G1182500;MD14G1182300;MD14G1180800;MD14G1181300;MD14G1180700;MD14G1181100;MD14G1181200;MD14G1181500;MD14G1180900;MD14G1182400;MD14G1182000;MD14G1182200
1636	MSTRG.103193.1	MD13G1034800;MD13G1033300;MD13G1035100;MD13G1035000;MD13G1032900;MD13G1032400;MD13G1035500;MD13G1034900;MD13G1034200;MD13G1033400;MD13G1033100;MD13G1034400;MD13G1035400;MD13G1034600;MD13G1032600;MD13G1034700;MD13G1033900;MD13G1032700;MD13G1035600;MD13G1035800;MD13G1032500;MD13G1033600;MD13G1034500;MD13G1032800;MD13G1034300;MD13G1033000;MD13G1035200;MD13G1035700;MD13G1034100;MD13G1033700;MD13G1033…
1637	MSTRG.3181.19	MD00G1093400;MD00G1093500;MD00G1092900;MD00G1093600;MD00G1093700;MD00G1092500;MD00G1094000;MD00G1093000;MD00G1092800;MD00G1093200;MD00G1093900;MD00G1094100;MD00G1092700;MD00G1093300;MD00G1092600
1638	MSTRG.7344.43	MD00G1215600;MD00G1220200;MD00G1220300;MD00G1219900;MD00G1215700;MD00G1215500;MD00G1220000;MD00G1215800
1639	MSTRG.86700.4	MD11G1003900;MD11G1003300;MD11G1003100;MD11G1002100;MD11G1001800;MD11G1001400;MD11G1001200;MD11G1002500;MD11G1002200;MD11G1002400;MD11G1002700;MD11G1003600;MD11G1003500;MD11G1001300;MD11G1003800;MD11G1001600;MD11G1004000;MD11G1001700;MD11G1003200;MD11G1002300;MD11G1003700;MD11G1002900;MD11G1002600;MD11G1002800;MD11G1003400
1640	MSTRG.139422.1	MD17G1023800;MD17G1024600;MD17G1026300;MD17G1024700;MD17G1025100;MD17G1024400;MD17G1024800;MD17G1026400;MD17G1024100;MD17G1025600;MD17G1025500;MD17G1024200;MD17G1025400;MD17G1024000;MD17G1025000;MD17G1025700;MD17G1024300;MD17G1026500;MD17G1024500;MD17G1025900;MD17G1025200;MD17G1025300;MD17G1026000;MD17G1026600;MD17G1025800;MD17G1023900;MD17G1026100;MD17G1024900;MD17G1026200
1641	MSTRG.13840.4	MD01G1239300;MD01G1239700;MD01G1237600;MD01G1237700;MD01G1239400;MD01G1238200;MD01G1240200;MD01G1238400;MD01G1239600;MD01G1238500;MD01G1237800;MD01G1239500;MD01G1238100;MD01G1237300;MD01G1238300;MD01G1240100;MD01G1238700;MD01G1239200;MD01G1237500;MD01G1237400;MD01G1239100;MD01G1237200
1642	MSTRG.129414.2	MD15G1414400;MD15G1413100;MD15G1413700;MD15G1413600;MD15G1414200;MD15G1413800;MD15G1414300;MD15G1413200;MD15G1413400;MD15G1413000;MD15G1414000;MD15G1413500;MD15G1414100;MD15G1413300;MD15G1414500
1643	MSTRG.135876.1	MD16G1212200;MD16G1211500;MD16G1210800;MD16G1211900;MD16G1211700;MD16G1211000;MD16G1212100;MD16G1211400;MD16G1210600;MD16G1212000;MD16G1211600;MD16G1211800
1644	MSTRG.87560.44	MD11G1045800;MD11G1043900;MD11G1044700;MD11G1044100;MD11G1045900;MD11G1044000;MD11G1043800;MD11G1045400;MD11G1045000;MD11G1044400;MD11G1044600;MD11G1045100;MD11G1044800;MD11G1045300;MD11G1045500;MD11G1045700;MD11G1044500;MD11G1045600;MD11G1046000;MD11G1043700
1645	MSTRG.14809.1	MD02G1040500;MD02G1041200;MD02G1042000;MD02G1040800;MD02G1040400;MD02G1041500;MD02G1042900;MD02G1041300;MD02G1042300;MD02G1042100;MD02G1040600;MD02G1042800;MD02G1042500;MD02G1043000;MD02G1042700;MD02G1042400;MD02G1042600;MD02G1040900;MD02G1042200;MD02G1041000;MD02G1041100
1646	MSTRG.4696.1	MD00G1135600;MD00G1135500;MD00G1135400
1647	MSTRG.142440.1	MD17G1148200;MD17G1147800;MD17G1148000;MD17G1147900;MD17G1147700;MD17G1148400;MD17G1148100;MD17G1148300
1648	MSTRG.67681.2	MD08G1204900;MD08G1205000;MD08G1205700;MD08G1205800;MD08G1204800;MD08G1206000;MD08G1204700;MD08G1206100;MD08G1204600;MD08G1204300;MD08G1205600;MD08G1205100;MD08G1205300;MD08G1204500;MD08G1205900;MD08G1204400;MD08G1205200;MD08G1205500
1649	MSTRG.132841.1	MD16G1103400;MD16G1104500;MD16G1103600;MD16G1103900;MD16G1104800;MD16G1104000;MD16G1104600;MD16G1104900;MD16G1104200;MD16G1105400;MD16G1104400;MD16G1105800;MD16G1103300;MD16G1105600;MD16G1104300;MD16G1105700;MD16G1103500;MD16G1105000;MD16G1104700;MD16G1103200
1650	MSTRG.21637.6	MD02G1305900;MD02G1306300;MD02G1306500;MD02G1305100;MD02G1306400;MD02G1305800;MD02G1305300;MD02G1306000;MD02G1305000;MD02G1306600;MD02G1305500;MD02G1305700;MD02G1305400;MD02G1305600;MD02G1306700;MD02G1306200;MD02G1306100
1651	MSTRG.113400.10	MD14G1087500;MD14G1087700;MD14G1087100;MD14G1087800
1652	MSTRG.110261.6	MD13G1272600;MD13G1272800;MD13G1272400;MD13G1272500
1653	MSTRG.124282.1	MD15G1251400;MD15G1251600;MD15G1251100;MD15G1252000;MD15G1250900;MD15G1251900;MD15G1251500;MD15G1251000;MD15G1251700;MD15G1251800;MD15G1250800
1654	MSTRG.136343.2	MD16G1224500;MD16G1224800;MD16G1225100;MD16G1225300;MD16G1224300;MD16G1224200;MD16G1224900;MD16G1225200;MD16G1225000;MD16G1224700;MD16G1225400;MD16G1225500
1655	MSTRG.104248.1	MD13G1076400;MD13G1078100;MD13G1077200;MD13G1077300;MD13G1077400;MD13G1077700;MD13G1076000;MD13G1077100;MD13G1075900;MD13G1078300;MD13G1077600;MD13G1076100;MD13G1077000;MD13G1076800;MD13G1078200;MD13G1075300;MD13G1078000;MD13G1075700;MD13G1078400;MD13G1077900;MD13G1075400;MD13G1075600;MD13G1077800;MD13G1076200
1656	MSTRG.144318.1	MD17G1204700;MD17G1203700;MD17G1204000;MD17G1204600;MD17G1203800;MD17G1204500;MD17G1204200;MD17G1204800;MD17G1204400;MD17G1203900;MD17G1203500;MD17G1204100;MD17G1204300;MD17G1203400;MD17G1203600
1657	MSTRG.54965.2	MD07G1060400;MD07G1060500;MD07G1059100;MD07G1060600;MD07G1060000;MD07G1060300;MD07G1059700;MD07G1059900;MD07G1059500;MD07G1059600;MD07G1059200;MD07G1059400;MD07G1059300;MD07G1060800;MD07G1059800;MD07G1060700;MD07G1060200
1658	MSTRG.91673.23	MD11G1198700;MD11G1198600;MD11G1198900;MD11G1198300;MD11G1198200;MD11G1199300;MD11G1199100;MD11G1199000
1659	MSTRG.44873.1	MD05G1279200;MD05G1280300;MD05G1279300;MD05G1280100;MD05G1279500;MD05G1281200;MD05G1280700;MD05G1280900;MD05G1279400;MD05G1279600;MD05G1280000;MD05G1281000;MD05G1280800;MD05G1280400;MD05G1279900;MD05G1281100;MD05G1279700;MD05G1280600;MD05G1281300;MD05G1280500;MD05G1280200;MD05G1279800
1660	MSTRG.28195.3	MD03G1223300;MD03G1224100;MD03G1223400;MD03G1222900;MD03G1223600;MD03G1224000;MD03G1223900;MD03G1223500;MD03G1223800;MD03G1223700
1661	MSTRG.64559.7	MD08G1107600;MD08G1108500;MD08G1107500;MD08G1107900;MD08G1107800;MD08G1108400;MD08G1109300;MD08G1109200;MD08G1108900;MD08G1109000;MD08G1108600;MD08G1108300;MD08G1109100;MD08G1108800;MD08G1108100;MD08G1108000;MD08G1107700;MD08G1108700
1662	MSTRG.28154.1	MD03G1221800;MD03G1222400;MD03G1222000;MD03G1222300;MD03G1222100;MD03G1222200;MD03G1221700;MD03G1221500;MD03G1222600;MD03G1222500
1663	MSTRG.110634.1	MD13G1282100;MD13G1282200;MD13G1282000
1664	MSTRG.58501.2	MD07G1174400;MD07G1173900;MD07G1174000;MD07G1174700;MD07G1174200;MD07G1174300;MD07G1174100;MD07G1174500;MD07G1173600;MD07G1174600
1665	MSTRG.37421.2	MD05G1013300;MD05G1014300;MD05G1012800;MD05G1014100;MD05G1014200;MD05G1013000;MD05G1012600;MD05G1012700;MD05G1014400;MD05G1013400;MD05G1013100;MD05G1013200;MD05G1012900
1666	MSTRG.65421.6	MD08G1136400;MD08G1137000;MD08G1137400;MD08G1137500;MD08G1136900;MD08G1136700;MD08G1136800;MD08G1136600;MD08G1137200;MD08G1137600;MD08G1136500;MD08G1137300
1667	MSTRG.28101.2	MD03G1220100;MD03G1219200;MD03G1219300;MD03G1219900;MD03G1220200;MD03G1219700;MD03G1221500;MD03G1219400;MD03G1219800;MD03G1220400;MD03G1220800;MD03G1221200;MD03G1220300;MD03G1221400;MD03G1221300;MD03G1220500;MD03G1219600;MD03G1219500;MD03G1221100
1668	MSTRG.129836.2	MD15G1430900;MD15G1431500;MD15G1430400;MD15G1431700;MD15G1430500;MD15G1431000;MD15G1431200;MD15G1430000;MD15G1431300;MD15G1429400;MD15G1430800;MD15G1431100;MD15G1430200;MD15G1430300;MD15G1431600;MD15G1430600;MD15G1429700;MD15G1431400;MD15G1430700;MD15G1429800;MD15G1429900;MD15G1429600;MD15G1429300;MD15G1429500
1669	MSTRG.49850.11	MD06G1091900;MD06G1092700;MD06G1092800;MD06G1092200;MD06G1092100;MD06G1091600;MD06G1092500;MD06G1092400;MD06G1091700;MD06G1091800;MD06G1092000;MD06G1092300
1670	MSTRG.141117.1	MD17G1095600;MD17G1096100;MD17G1096700;MD17G1096800;MD17G1096200;MD17G1095500;MD17G1097300;MD17G1096500;MD17G1097200;MD17G1096300;MD17G1096900;MD17G1096000;MD17G1096400;MD17G1095300;MD17G1097400;MD17G1096600;MD17G1095400;MD17G1095900;MD17G1097500;MD17G1095800;MD17G1097000;MD17G1095700;MD17G1095200;MD17G1095100;MD17G1097100
1671	MSTRG.30765.1	MD04G1022400;MD04G1023700;MD04G1022300;MD04G1022600;MD04G1024400;MD04G1022500;MD04G1024300;MD04G1023800;MD04G1023500;MD04G1023100;MD04G1023000;MD04G1024000;MD04G1022900;MD04G1024200;MD04G1023600;MD04G1023200;MD04G1023400;MD04G1023900;MD04G1022700;MD04G1022200
1672	MSTRG.19902.5	MD02G1237200;MD02G1236700;MD02G1236500;MD02G1237400;MD02G1236900;MD02G1237300;MD02G1236600;MD02G1236800
1673	MSTRG.145407.1	MD17G1241700;MD17G1240400;MD17G1240500;MD17G1241500;MD17G1241600;MD17G1241300;MD17G1240900;MD17G1240700;MD17G1240200;MD17G1240000;MD17G1241400;MD17G1241200;MD17G1240300;MD17G1240800;MD17G1240600;MD17G1241000
1674	MSTRG.43292.1	MD05G1217900;MD05G1217300;MD05G1217700;MD05G1216900;MD05G1216300;MD05G1217800;MD05G1216600;MD05G1217500;MD05G1216400;MD05G1217600;MD05G1217400;MD05G1216700;MD05G1218000;MD05G1218100;MD05G1216100;MD05G1217200;MD05G1217100;MD05G1217000;MD05G1216500;MD05G1216800
1675	MSTRG.126891.1	MD15G1335800;MD15G1336100;MD15G1336800;MD15G1336400;MD15G1336300;MD15G1335700;MD15G1336200;MD15G1336900
1676	MSTRG.122276.7	MD15G1176300;MD15G1176800;MD15G1177500;MD15G1176200;MD15G1176700;MD15G1177800;MD15G1176000;MD15G1177700;MD15G1176600;MD15G1176900;MD15G1175900;MD15G1177300;MD15G1177200;MD15G1177100;MD15G1176500;MD15G1177900;MD15G1177600;MD15G1177000;MD15G1176400;MD15G1177400
1677	MSTRG.86543.25	MD10G1340100;MD10G1339900;MD10G1341700;MD10G1339800;MD10G1340300;MD10G1341200;MD10G1339200;MD10G1341300;MD10G1341900;MD10G1340700;MD10G1340800;MD10G1339500;MD10G1341600;MD10G1340900;MD10G1339300;MD10G1339700;MD10G1340200;MD10G1341800;MD10G1341400;MD10G1340400;MD10G1340500;MD10G1341000;MD10G1339600;MD10G1339400;MD10G1341500;MD10G1341100;MD10G1340000
1678	MSTRG.35148.2	MD04G1172700;MD04G1173800;MD04G1172900;MD04G1173600;MD04G1173000;MD04G1174100;MD04G1173300;MD04G1173900;MD04G1173400;MD04G1172500;MD04G1173500;MD04G1173100;MD04G1174000;MD04G1173700;MD04G1172600;MD04G1173200;MD04G1172800;MD04G1174300
1679	MSTRG.146373.1	MD17G1278100;MD17G1274000;MD17G1274300;MD17G1273300;MD17G1277300;MD17G1277700;MD17G1278400;MD17G1272900;MD17G1274400;MD17G1273200;MD17G1277900;MD17G1278000;MD17G1277400;MD17G1273800;MD17G1273900;MD17G1274200;MD17G1274100;MD17G1277500;MD17G1273000;MD17G1277200;MD17G1278200;MD17G1277600;MD17G1278300;MD17G1273100;MD17G1277800;MD17G1277100
1680	MSTRG.44610.13	MD05G1268500;MD05G1267900;MD05G1268600;MD05G1268700;MD05G1268400;MD05G1268000;MD05G1270000;MD05G1269100;MD05G1269000;MD05G1269700;MD05G1268900;MD05G1269300;MD05G1268100;MD05G1269800;MD05G1269400;MD05G1268800;MD05G1269200;MD05G1269900;MD05G1269500;MD05G1269600;MD05G1268200
1681	MSTRG.79840.1	MD10G1089400;MD10G1089600;MD10G1089800;MD10G1089700;MD10G1089500
1682	MSTRG.107423.2	MD13G1192200;MD13G1192000;MD13G1191900;MD13G1192900;MD13G1192500;MD13G1192300;MD13G1192700;MD13G1192800;MD13G1192400;MD13G1192100
1683	MSTRG.10690.5	MD01G1104800;MD01G1104300;MD01G1105000;MD01G1104200;MD01G1103800;MD01G1104600;MD01G1104700;MD01G1105100;MD01G1104900
1684	MSTRG.54143.19	MD07G1020100;MD07G1018500;MD07G1020400;MD07G1018800;MD07G1019800;MD07G1019900;MD07G1019200;MD07G1020600;MD07G1019500;MD07G1020700;MD07G1019300;MD07G1018400;MD07G1018700;MD07G1019700;MD07G1020200;MD07G1019400;MD07G1020300;MD07G1020500;MD07G1020000;MD07G1020800;MD07G1018900;MD07G1018300
1685	MSTRG.22329.1	MD03G1012600;MD03G1012500;MD03G1012900;MD03G1012800;MD03G1011200;MD03G1011700;MD03G1011900;MD03G1012700;MD03G1012400;MD03G1011800;MD03G1011600;MD03G1011500;MD03G1012200;MD03G1012000;MD03G1011300;MD03G1012100;MD03G1012300;MD03G1011400
1686	MSTRG.76698.1	MD09G1283200;MD09G1283100;MD09G1282200;MD09G1282100;MD09G1282400;MD09G1282500;MD09G1282600;MD09G1282700;MD09G1283000;MD09G1282900
1687	MSTRG.24097.2	MD03G1093000;MD03G1093400;MD03G1093100;MD03G1093500;MD03G1092800;MD03G1093300;MD03G1093600;MD03G1094600;MD03G1092900;MD03G1094000;MD03G1093900;MD03G1094400;MD03G1094500;MD03G1093800;MD03G1094200
1688	MSTRG.47966.6	MD06G1039300;MD06G1038700;MD06G1039000;MD06G1038300;MD06G1038800;MD06G1038600;MD06G1039400;MD06G1038400;MD06G1038500;MD06G1039100;MD06G1038900
1689	MSTRG.112785.1	MD14G1069700;MD14G1069600;MD14G1069500;MD14G1070300;MD14G1069900;MD14G1070200;MD14G1069300;MD14G1069400;MD14G1070400;MD14G1069200
1690	MSTRG.134379.1	MD16G1160100;MD16G1159700;MD16G1159300;MD16G1160500;MD16G1159400;MD16G1159600;MD16G1160400;MD16G1160300;MD16G1160600;MD16G1159500;MD16G1160200;MD16G1159900;MD16G1160000
1691	MSTRG.138698.2	MD16G1283300;MD16G1283200
1692	MSTRG.78010.16	MD10G1036300;MD10G1036500;MD10G1036200;MD10G1037300;MD10G1036900;MD10G1037500;MD10G1037200;MD10G1037000;MD10G1037400;MD10G1036400
1693	MSTRG.40742.1	MD05G1116200;MD05G1116400;MD05G1115000;MD05G1115400;MD05G1115500;MD05G1115200;MD05G1116800;MD05G1116600;MD05G1115300;MD05G1115600;MD05G1115100;MD05G1116700;MD05G1115700;MD05G1116500;MD05G1115800;MD05G1116000
1694	MSTRG.110704.1	MD13G1283400;MD13G1283100;MD13G1283300
1695	MSTRG.145792.1	MD17G1253900;MD17G1254500;MD17G1254200;MD17G1254300
1696	MSTRG.4418.3	MD00G1128500;MD00G1128300;MD00G1129000;MD00G1128400;MD00G1128800;MD00G1129100
1697	MSTRG.70666.1	MD09G1073400;MD09G1074300;MD09G1073500;MD09G1074000;MD09G1073800;MD09G1075200;MD09G1074500;MD09G1074200;MD09G1073600;MD09G1073300;MD09G1075000;MD09G1074800;MD09G1074600;MD09G1073900;MD09G1074400;MD09G1075100;MD09G1073100;MD09G1074100
1698	MSTRG.82843.5	MD10G1190200;MD10G1189600;MD10G1191200;MD10G1190100;MD10G1189900;MD10G1190300;MD10G1191300;MD10G1190500;MD10G1190000;MD10G1191100;MD10G1190400;MD10G1190800;MD10G1189800;MD10G1190700;MD10G1190900;MD10G1189700
1699	MSTRG.67046.4	MD08G1185600;MD08G1185700;MD08G1185100;MD08G1185200;MD08G1185000;MD08G1185500
1700	MSTRG.110857.1	MD13G1285600;MD13G1285300;MD13G1285200;MD13G1285500
1701	MSTRG.103495.1	MD13G1046100;MD13G1046300;MD13G1045100;MD13G1045800;MD13G1046400;MD13G1046200;MD13G1045300;MD13G1046500;MD13G1046700;MD13G1047200;MD13G1045700;MD13G1045400;MD13G1046000;MD13G1044900;MD13G1046900;MD13G1047000;MD13G1045900;MD13G1045000;MD13G1045600;MD13G1047100;MD13G1046600;MD13G1045500
1702	MSTRG.80789.2	MD10G1117900;MD10G1117500;MD10G1118200;MD10G1118000;MD10G1117400;MD10G1116800;MD10G1118100;MD10G1116600;MD10G1117300;MD10G1117700;MD10G1117600;MD10G1116900;MD10G1117200
1703	MSTRG.69604.1	MD09G1027800;MD09G1029400;MD09G1026900;MD09G1029000;MD09G1027300;MD09G1029600;MD09G1029200;MD09G1028400;MD09G1030300;MD09G1028100;MD09G1028000;MD09G1027000;MD09G1028500;MD09G1030000;MD09G1028300;MD09G1030200;MD09G1028600;MD09G1027100;MD09G1026800;MD09G1028900;MD09G1029300;MD09G1027400;MD09G1027200;MD09G1029500;MD09G1029800;MD09G1027500;MD09G1030100;MD09G1027600;MD09G1029100;MD09G1030400;MD09G1029…
1704	MSTRG.56094.1	MD07G1103300;MD07G1102800;MD07G1102700;MD07G1102600;MD07G1103400;MD07G1103100;MD07G1103200
1705	MSTRG.110207.12	MD13G1271600
1706	MSTRG.96514.1	MD12G1054300;MD12G1053600;MD12G1053800;MD12G1053400;MD12G1054100;MD12G1054200;MD12G1053900
1707	MSTRG.56206.10	MD07G1108900;MD07G1108300;MD07G1108600;MD07G1108200;MD07G1108700;MD07G1108800;MD07G1108000;MD07G1108500;MD07G1108400
1708	MSTRG.43154.1	MD05G1209000;MD05G1210800;MD05G1208700;MD05G1211100;MD05G1210900;MD05G1210100;MD05G1209600;MD05G1210600;MD05G1210400;MD05G1210300;MD05G1209400;MD05G1209700;MD05G1210500;MD05G1209500;MD05G1210200;MD05G1209900;MD05G1211000;MD05G1210000;MD05G1210700;MD05G1209300;MD05G1209200;MD05G1209800;MD05G1208800;MD05G1209100;MD05G1208900
1709	MSTRG.10722.2	MD01G1105000;MD01G1105200;MD01G1105900;MD01G1105800;MD01G1104600;MD01G1104900;MD01G1104700;MD01G1104300;MD01G1104800;MD01G1105400;MD01G1105700;MD01G1106100;MD01G1105600;MD01G1106000;MD01G1105100;MD01G1105500
1710	MSTRG.84989.1	MD10G1278300;MD10G1279400;MD10G1277900;MD10G1278100;MD10G1278500;MD10G1278200;MD10G1278600;MD10G1278700;MD10G1278000;MD10G1278900;MD10G1279300;MD10G1278400;MD10G1278800
1711	MSTRG.30564.1	MD04G1016800;MD04G1016500;MD04G1016400;MD04G1016300;MD04G1016200;MD04G1016900;MD04G1016700;MD04G1016600;MD04G1017100;MD04G1016100;MD04G1017000
1712	MSTRG.87300.1	MD11G1028300;MD11G1029800;MD11G1030300;MD11G1030000;MD11G1028500;MD11G1028200;MD11G1029400;MD11G1028900;MD11G1029600;MD11G1029500;MD11G1028400;MD11G1030100;MD11G1030200;MD11G1029700;MD11G1029000;MD11G1029300;MD11G1028800;MD11G1028700;MD11G1029100;MD11G1029900;MD11G1028600
1713	MSTRG.144851.1	MD17G1219600;MD17G1220300;MD17G1220600;MD17G1220100;MD17G1220200;MD17G1219800;MD17G1220400;MD17G1220500;MD17G1219900;MD17G1220000;MD17G1219700
1714	MSTRG.28902.2	MD03G1249700;MD03G1249400;MD03G1248800;MD03G1249000;MD03G1249500;MD03G1249100;MD03G1249200;MD03G1248700;MD03G1248900;MD03G1249600
1715	MSTRG.38064.1	MD05G1033200;MD05G1033700;MD05G1033800;MD05G1033000;MD05G1034100;MD05G1034300;MD05G1033100;MD05G1033400;MD05G1033300;MD05G1032900;MD05G1034000;MD05G1034200;MD05G1032800;MD05G1033900
1716	MSTRG.11237.3	MD01G1122500;MD01G1124100;MD01G1123300;MD01G1122000;MD01G1122800;MD01G1123200;MD01G1124200;MD01G1123800;MD01G1124300;MD01G1123000;MD01G1124000;MD01G1122100;MD01G1122700;MD01G1123900;MD01G1121900;MD01G1122400;MD01G1122300;MD01G1122200;MD01G1122900;MD01G1122600;MD01G1123600;MD01G1123400
1717	MSTRG.103008.1	MD13G1028100;MD13G1027900;MD13G1026400;MD13G1027200;MD13G1026900;MD13G1028200;MD13G1025800;MD13G1027500;MD13G1027300;MD13G1027400;MD13G1027100;MD13G1025500;MD13G1028000;MD13G1027000;MD13G1026200;MD13G1026500;MD13G1026700;MD13G1026600;MD13G1025900;MD13G1026800;MD13G1027800;MD13G1025700;MD13G1025600;MD13G1026100;MD13G1026300
1718	MSTRG.57241.1	MD07G1136700;MD07G1135700;MD07G1136500;MD07G1135900;MD07G1136400;MD07G1136300;MD07G1136200;MD07G1136800;MD07G1135800;MD07G1136600
1719	MSTRG.62294.1	MD08G1020400;MD08G1019100;MD08G1021500;MD08G1018400;MD08G1019000;MD08G1019900;MD08G1019200;MD08G1020800;MD08G1019400;MD08G1019500;MD08G1020300;MD08G1020100;MD08G1021200;MD08G1021600;MD08G1020200;MD08G1019600;MD08G1018800;MD08G1021300;MD08G1021400;MD08G1019800;MD08G1020000;MD08G1018200;MD08G1020900;MD08G1020600;MD08G1018500;MD08G1018900;MD08G1018700;MD08G1021000;MD08G1020700;MD08G1021700;MD08G1019…
1720	MSTRG.128426.1	MD15G1380400;MD15G1380300;MD15G1380500;MD15G1381000;MD15G1380000;MD15G1380600;MD15G1380100;MD15G1380700;MD15G1380800;MD15G1380900
1721	MSTRG.94847.3	MD11G1308200;MD11G1309000;MD11G1310300;MD11G1309100;MD11G1308500;MD11G1308000;MD11G1309400;MD11G1307300;MD11G1308800;MD11G1309500;MD11G1308600;MD11G1307800;MD11G1309600;MD11G1308300;MD11G1307600;MD11G1308100;MD11G1307900;MD11G1307500;MD11G1308900;MD11G1308400;MD11G1310200;MD11G1309700;MD11G1309900;MD11G1310400;MD11G1310000;MD11G1309200;MD11G1307400;MD11G1309300;MD11G1309800;MD11G1308700;MD11G1307…
1722	MSTRG.129663.3	MD15G1421400;MD15G1420900;MD15G1422000;MD15G1421700;MD15G1422300;MD15G1421600;MD15G1422200;MD15G1421300;MD15G1422800;MD15G1423100;MD15G1422700;MD15G1421500;MD15G1421100;MD15G1422900;MD15G1423300;MD15G1422400;MD15G1422100;MD15G1422600;MD15G1423200;MD15G1421900;MD15G1422500
1723	MSTRG.70496.1	MD09G1068700;MD09G1068800;MD09G1068200;MD09G1068600;MD09G1067600;MD09G1068300;MD09G1068500;MD09G1066800;MD09G1067500;MD09G1068000;MD09G1066900;MD09G1068100;MD09G1067000;MD09G1067100;MD09G1066700;MD09G1066500;MD09G1068400;MD09G1066200;MD09G1067800;MD09G1066300;MD09G1067900;MD09G1067200;MD09G1066100;MD09G1067300;MD09G1066400
1724	MSTRG.85082.1	MD10G1281800;MD10G1280300;MD10G1280200;MD10G1279600;MD10G1280000;MD10G1280400;MD10G1280600;MD10G1281700;MD10G1281100;MD10G1281400;MD10G1280100;MD10G1280700;MD10G1281300;MD10G1279800;MD10G1280900;MD10G1281000;MD10G1279500;MD10G1280500;MD10G1280800;MD10G1281900;MD10G1281600;MD10G1279900;MD10G1281500;MD10G1281200
1725	MSTRG.47865.1	MD06G1036000;MD06G1036900;MD06G1037200;MD06G1035800;MD06G1035600;MD06G1036400;MD06G1036700;MD06G1037300;MD06G1035700;MD06G1036200;MD06G1035900;MD06G1037000;MD06G1037100;MD06G1037400;MD06G1036300;MD06G1037500;MD06G1036600
1726	MSTRG.134515.1	MD16G1163500;MD16G1163300;MD16G1164300;MD16G1163400;MD16G1164100;MD16G1163700;MD16G1163800;MD16G1164000;MD16G1163600;MD16G1163900;MD16G1164200
1727	MSTRG.75072.1	MD09G1225000;MD09G1225200;MD09G1224900;MD09G1225500
1728	MSTRG.57902.2	MD07G1156500;MD07G1156200;MD07G1156000;MD07G1156400;MD07G1155400;MD07G1155500;MD07G1155600;MD07G1155900
1729	MSTRG.60219.1	MD07G1243700;MD07G1242300;MD07G1243400;MD07G1243900;MD07G1243300;MD07G1243100;MD07G1244300;MD07G1244200;MD07G1243000;MD07G1242100;MD07G1244600;MD07G1244500;MD07G1244100;MD07G1242900;MD07G1244700;MD07G1243600;MD07G1242400;MD07G1242000;MD07G1242500;MD07G1244000;MD07G1243800;MD07G1243500;MD07G1242700
1730	MSTRG.140107.1	MD17G1055400;MD17G1054800;MD17G1055100;MD17G1054100;MD17G1054600;MD17G1055300;MD17G1055000;MD17G1055200;MD17G1054900;MD17G1054300;MD17G1054400;MD17G1054700;MD17G1054500;MD17G1054200
1731	MSTRG.136937.1	MD16G1241200;MD16G1240700;MD16G1241400;MD16G1241000;MD16G1240800;MD16G1241100;MD16G1241300;MD16G1240600;MD16G1241700;MD16G1240500;MD16G1240900
1732	MSTRG.104221.2	MD13G1075900;MD13G1076000;MD13G1074700;MD13G1074500;MD13G1074300;MD13G1076400;MD13G1074600;MD13G1074200;MD13G1075000;MD13G1074400;MD13G1075700;MD13G1074100;MD13G1075400;MD13G1076800;MD13G1075300;MD13G1074800;MD13G1076200;MD13G1075600;MD13G1076100;MD13G1075200;MD13G1074900
1733	MSTRG.19110.2	MD02G1209900;MD02G1210200;MD02G1210100
1734	MSTRG.2675.1	MD00G1079600;MD00G1080100;MD00G1079400;MD00G1080700;MD00G1080500;MD00G1080200;MD00G1080600;MD00G1079300;MD00G1079900;MD00G1080300;MD00G1079200;MD00G1079500;MD00G1079100;MD00G1079700;MD00G1080000;MD00G1080400
1735	MSTRG.146176.2	MD17G1268100;MD17G1268200;MD17G1266200;MD17G1266100;MD17G1267700;MD17G1266600;MD17G1268500;MD17G1266900;MD17G1266400;MD17G1267500;MD17G1267400;MD17G1268000;MD17G1268400;MD17G1267000;MD17G1266300;MD17G1267200;MD17G1267900;MD17G1267100;MD17G1266700;MD17G1267800;MD17G1268600;MD17G1267300;MD17G1268700;MD17G1268300
1736	MSTRG.37571.1	MD05G1019100;MD05G1019000;MD05G1020200;MD05G1020300;MD05G1020000;MD05G1020100;MD05G1019200;MD05G1019600;MD05G1019700;MD05G1018900
1737	MSTRG.23339.2	MD03G1060200;MD03G1059900;MD03G1060300;MD03G1060900;MD03G1062200;MD03G1060700;MD03G1062500;MD03G1061300;MD03G1062300;MD03G1061200;MD03G1060500;MD03G1060400;MD03G1062400;MD03G1062600;MD03G1062100;MD03G1060100;MD03G1060600;MD03G1061400;MD03G1062000;MD03G1061600
1738	MSTRG.46914.4	MD06G1004700;MD06G1004200;MD06G1003600;MD06G1003800;MD06G1003900;MD06G1004600;MD06G1004100;MD06G1004300;MD06G1005000;MD06G1003700;MD06G1005400;MD06G1004000;MD06G1003500;MD06G1004900;MD06G1005300;MD06G1005100;MD06G1005200
1739	MSTRG.134392.1	MD16G1161100;MD16G1160100;MD16G1160400;MD16G1160700;MD16G1160300;MD16G1161200;MD16G1160500;MD16G1160200;MD16G1160800;MD16G1160600;MD16G1161000;MD16G1160000;MD16G1160900
1740	MSTRG.49098.1	MD06G1071600
1741	MSTRG.129614.1	MD15G1420400;MD15G1420000;MD15G1420900;MD15G1420600;MD15G1419600;MD15G1420100;MD15G1420500;MD15G1419700;MD15G1420700;MD15G1419800;MD15G1419900;MD15G1420800
1742	MSTRG.6080.1	MD00G1172700;MD00G1172600
1743	MSTRG.76605.6	MD09G1279900;MD09G1280800;MD09G1280200;MD09G1281000;MD09G1279800;MD09G1279500;MD09G1280600;MD09G1281100;MD09G1281200;MD09G1280300;MD09G1280400;MD09G1280000;MD09G1280900;MD09G1280500;MD09G1279600;MD09G1280100;MD09G1279700;MD09G1280700
1744	MSTRG.34660.6	MD04G1154600;MD04G1155600;MD04G1155500;MD04G1156300;MD04G1154900;MD04G1154500;MD04G1155800;MD04G1155700;MD04G1154400;MD04G1156000;MD04G1156200;MD04G1155900;MD04G1154300;MD04G1155400
1745	MSTRG.91895.1	MD11G1203600;MD11G1204800;MD11G1204400;MD11G1204300;MD11G1204200;MD11G1203900;MD11G1204100;MD11G1204000;MD11G1204600;MD11G1203700;MD11G1204700
1746	MSTRG.37189.3	MD05G1007200;MD05G1007000;MD05G1006500;MD05G1006800;MD05G1007100;MD05G1006600;MD05G1006700
1747	MSTRG.89654.1	MD11G1142200;MD11G1141000;MD11G1141800;MD11G1142300;MD11G1140700;MD11G1141300;MD11G1140900;MD11G1142000;MD11G1142500;MD11G1141100;MD11G1140800;MD11G1142400;MD11G1141500;MD11G1141900;MD11G1141700;MD11G1142100;MD11G1141200
1748	MSTRG.76066.2	MD09G1257400;MD09G1258400;MD09G1258800;MD09G1257600;MD09G1257800;MD09G1257300;MD09G1258300;MD09G1258700;MD09G1258600;MD09G1257200;MD09G1257100;MD09G1258100;MD09G1258000;MD09G1258200
1749	MSTRG.110915.2	MD14G1000800;MD14G1000200;MD14G1000700;MD14G1000500;MD14G1000100;MD14G1000600
1750	MSTRG.34736.12	MD04G1160600;MD04G1160300;MD04G1159900;MD04G1160700;MD04G1159800;MD04G1160400;MD04G1160500;MD04G1160100
1751	MSTRG.32655.1	MD04G1087000;MD04G1087200;MD04G1087300;MD04G1087100
1752	MSTRG.127130.1	MD15G1343200;MD15G1343300;MD15G1343600;MD15G1343500;MD15G1343400
1753	MSTRG.128380.1	MD15G1379500;MD15G1379700;MD15G1379900;MD15G1380100;MD15G1379100;MD15G1379000;MD15G1379600;MD15G1379800;MD15G1380000
1754	MSTRG.64137.1	MD08G1094300;MD08G1093300;MD08G1091800;MD08G1094100;MD08G1093700;MD08G1093500;MD08G1092200;MD08G1092000;MD08G1093600;MD08G1093900;MD08G1092900;MD08G1093400;MD08G1092600;MD08G1094200;MD08G1093000;MD08G1092300;MD08G1092400;MD08G1091900;MD08G1093800
1755	MSTRG.37560.1	MD05G1018500;MD05G1019100;MD05G1019000;MD05G1018300;MD05G1018400;MD05G1019200;MD05G1019700;MD05G1019600;MD05G1018900
1756	MSTRG.44610.40	MD05G1268900;MD05G1269300;MD05G1270000;MD05G1269700;MD05G1269000;MD05G1269100;MD05G1268400;MD05G1268700;MD05G1267900;MD05G1268500;MD05G1268600;MD05G1268000;MD05G1269200;MD05G1269900;MD05G1268200;MD05G1269600;MD05G1269500;MD05G1269400;MD05G1268800;MD05G1269800;MD05G1268100
1757	MSTRG.125307.2	MD15G1288500;MD15G1288200;MD15G1288300;MD15G1288000;MD15G1288400;MD15G1288100
1758	MSTRG.88771.1	MD11G1103600;MD11G1103300;MD11G1102200;MD11G1103100;MD11G1103500;MD11G1102100;MD11G1103400;MD11G1102400;MD11G1103000;MD11G1102300;MD11G1103200
1759	MSTRG.86524.1	MD10G1339600;MD10G1338800;MD10G1341000;MD10G1340500;MD10G1340400;MD10G1340000;MD10G1341100;MD10G1339400;MD10G1339000;MD10G1339500;MD10G1338300;MD10G1340800;MD10G1340200;MD10G1340600;MD10G1339300;MD10G1339700;MD10G1340900;MD10G1339200;MD10G1341300;MD10G1338400;MD10G1340700;MD10G1338500;MD10G1338700;MD10G1338600;MD10G1340100;MD10G1341200;MD10G1338900;MD10G1340300;MD10G1339800
1760	MSTRG.88443.5	MD11G1084900;MD11G1084000;MD11G1087400;MD11G1088500;MD11G1084100;MD11G1088300;MD11G1085100;MD11G1084400;MD11G1084800;MD11G1087500;MD11G1088000;MD11G1084500;MD11G1087300;MD11G1087700;MD11G1088400;MD11G1088600;MD11G1088800;MD11G1084600;MD11G1088700;MD11G1087800;MD11G1085200;MD11G1084300;MD11G1084200;MD11G1085000;MD11G1087600;MD11G1084700
1761	MSTRG.3047.11	MD00G1090900;MD00G1090300;MD00G1090600
1762	MSTRG.23445.2	MD03G1067500;MD03G1067700;MD03G1066700;MD03G1067200;MD03G1066600;MD03G1067400;MD03G1066900;MD03G1068000;MD03G1066300;MD03G1066000;MD03G1067900;MD03G1066400;MD03G1066500;MD03G1066200;MD03G1067300;MD03G1067600;MD03G1067800;MD03G1068100;MD03G1067100
1763	MSTRG.137093.7	MD16G1245500;MD16G1245100;MD16G1245200;MD16G1245000;MD16G1245600
1764	MSTRG.68373.1	MD08G1228900;MD08G1229400;MD08G1229600;MD08G1229200;MD08G1228500;MD08G1228400;MD08G1228200;MD08G1229500;MD08G1228600;MD08G1228100;MD08G1228700;MD08G1227800;MD08G1230300;MD08G1229300;MD08G1228000;MD08G1229700;MD08G1229000;MD08G1229900;MD08G1227900;MD08G1230200;MD08G1227700;MD08G1228300;MD08G1230100;MD08G1229100;MD08G1230000
1765	MSTRG.8131.1	MD01G1022400;MD01G1022500
1766	MSTRG.88443.87	MD11G1088300;MD11G1087300;MD11G1088000;MD11G1087500;MD11G1086000;MD11G1087400;MD11G1086300;MD11G1086200;MD11G1087200;MD11G1088500;MD11G1087000;MD11G1087100;MD11G1087600;MD11G1086500;MD11G1086600;MD11G1087700;MD11G1088400;MD11G1086800;MD11G1088600;MD11G1085800;MD11G1086400;MD11G1088700;MD11G1087800;MD11G1088800;MD11G1085700
1767	MSTRG.66053.2	MD08G1156000;MD08G1156200;MD08G1155200;MD08G1155800;MD08G1155700;MD08G1155400;MD08G1156500;MD08G1155500;MD08G1156300;MD08G1156700;MD08G1156100;MD08G1155900;MD08G1155600;MD08G1156600;MD08G1155300
1768	MSTRG.32544.1	MD04G1083900;MD04G1084500
1769	MSTRG.77131.3	MD10G1002000;MD10G1001500;MD10G1002300;MD10G1001800;MD10G1002100;MD10G1002400;MD10G1002200;MD10G1001700;MD10G1002500
1770	MSTRG.3948.1	MD00G1114800;MD00G1116000;MD00G1115000;MD00G1115200;MD00G1115300;MD00G1115100;MD00G1114900;MD00G1115400;MD00G1115500;MD00G1116100;MD00G1114700;MD00G1115700;MD00G1115800;MD00G1115900;MD00G1115600
1771	MSTRG.47966.1	MD06G1039100;MD06G1038500;MD06G1038900;MD06G1038800;MD06G1038600;MD06G1038400;MD06G1039400;MD06G1038700;MD06G1038300;MD06G1039000;MD06G1039300
1772	MSTRG.24295.11	MD03G1100400;MD03G1100600;MD03G1100100;MD03G1100500;MD03G1101200;MD03G1099900;MD03G1101800;MD03G1100900;MD03G1100000;MD03G1101500;MD03G1099700;MD03G1101600;MD03G1101300;MD03G1101700;MD03G1101000;MD03G1100700;MD03G1100200;MD03G1099800
1773	MSTRG.60014.2	MD07G1234100;MD07G1231700;MD07G1233100;MD07G1233500;MD07G1232200;MD07G1232800;MD07G1233400;MD07G1233800;MD07G1233900;MD07G1233300;MD07G1231600;MD07G1232400;MD07G1232300;MD07G1233000;MD07G1234400;MD07G1233700;MD07G1231900;MD07G1232000;MD07G1233200;MD07G1232700;MD07G1232100;MD07G1234000;MD07G1234200;MD07G1232600;MD07G1232900;MD07G1231800;MD07G1232500;MD07G1234300;MD07G1233600
1774	MSTRG.109834.1	MD13G1263700;MD13G1263500
1775	MSTRG.103511.1	MD13G1045800;MD13G1046400;MD13G1047300;MD13G1046100;MD13G1046300;MD13G1047400;MD13G1047500;MD13G1047200;MD13G1046200;MD13G1047700;MD13G1046500;MD13G1046700;MD13G1046000;MD13G1047100;MD13G1047800;MD13G1046600;MD13G1047600;MD13G1046900;MD13G1045900
1776	MSTRG.141928.1	MD17G1127900;MD17G1128300;MD17G1127000;MD17G1128700;MD17G1128200;MD17G1128800;MD17G1127800;MD17G1128000;MD17G1127600;MD17G1127700;MD17G1127500;MD17G1127200;MD17G1128900;MD17G1128600;MD17G1127100;MD17G1128400;MD17G1127400
1777	MSTRG.112342.1	MD14G1052700;MD14G1053100
1778	MSTRG.122276.2	MD15G1176200;MD15G1176000;MD15G1177800;MD15G1176600;MD15G1177700;MD15G1176300;MD15G1176800;MD15G1177500;MD15G1177600;MD15G1176400;MD15G1177000;MD15G1177400;MD15G1175900;MD15G1176900;MD15G1177300;MD15G1177100;MD15G1177200;MD15G1177900;MD15G1176500
1779	MSTRG.913.15	MD00G1029500;MD00G1029400;MD00G1029000;MD00G1029100;MD00G1029200;MD00G1029300;MD00G1028900;MD00G1030000;MD00G1030400;MD00G1030300
1780	MSTRG.56198.1	MD07G1108400;MD07G1108200;MD07G1108000;MD07G1107800;MD07G1107900;MD07G1107700;MD07G1108300
1781	MSTRG.42583.6	MD05G1190200;MD05G1190800;MD05G1191300;MD05G1190000;MD05G1190600;MD05G1191600;MD05G1191900;MD05G1191700;MD05G1189700;MD05G1190900;MD05G1191100;MD05G1192200;MD05G1190500;MD05G1191400;MD05G1191200;MD05G1191000;MD05G1190700;MD05G1189900;MD05G1189800;MD05G1192000;MD05G1192300;MD05G1191500;MD05G1189600;MD05G1192100;MD05G1189500;MD05G1189400
1782	MSTRG.52457.1	MD06G1195900;MD06G1193300;MD06G1193900;MD06G1195000;MD06G1194100;MD06G1196000;MD06G1193600;MD06G1195100;MD06G1195600;MD06G1194500;MD06G1194000;MD06G1194400;MD06G1193400;MD06G1192900;MD06G1195800;MD06G1194700;MD06G1195500;MD06G1193500;MD06G1193700;MD06G1193800;MD06G1193200;MD06G1194800;MD06G1194900;MD06G1194600
1783	MSTRG.41530.3	MD05G1145100;MD05G1144400;MD05G1144800;MD05G1144700;MD05G1144000;MD05G1143700;MD05G1143500;MD05G1144600;MD05G1144100;MD05G1144200;MD05G1144900;MD05G1145000;MD05G1144500
1784	MSTRG.58789.3	MD07G1183000;MD07G1182700;MD07G1183100;MD07G1184200;MD07G1183300;MD07G1183500;MD07G1182900;MD07G1183700;MD07G1183200;MD07G1182600;MD07G1183400;MD07G1184000;MD07G1182800;MD07G1183800;MD07G1183600
1785	MSTRG.90137.3	MD11G1158100;MD11G1158200;MD11G1158400;MD11G1159000;MD11G1157900;MD11G1158300;MD11G1157800;MD11G1158800;MD11G1157700;MD11G1158900;MD11G1158000;MD11G1158600;MD11G1158500
1786	MSTRG.123938.1	MD15G1241000;MD15G1238500;MD15G1240500;MD15G1240300;MD15G1238600;MD15G1240400;MD15G1240600;MD15G1239200;MD15G1241100;MD15G1238700;MD15G1239100;MD15G1238400;MD15G1238200;MD15G1238900;MD15G1238800;MD15G1241300;MD15G1238300;MD15G1241200;MD15G1240800;MD15G1240700;MD15G1239000
1787	MSTRG.22697.2	MD03G1032000;MD03G1032500;MD03G1032700;MD03G1032400;MD03G1031600;MD03G1031900;MD03G1031800;MD03G1031300;MD03G1032900;MD03G1031400;MD03G1032200;MD03G1030600;MD03G1032800;MD03G1030500;MD03G1031500;MD03G1030900;MD03G1031700;MD03G1030800;MD03G1030400;MD03G1030700;MD03G1032300;MD03G1031200;MD03G1032600;MD03G1032100;MD03G1033000
1788	MSTRG.88766.9	MD11G1102300;MD11G1103200;MD11G1102600;MD11G1102400;MD11G1102800;MD11G1103000;MD11G1102100;MD11G1103500;MD11G1103400;MD11G1102200;MD11G1103300;MD11G1103100;MD11G1103600;MD11G1102700
1789	MSTRG.104381.16	MD13G1084400;MD13G1082700;MD13G1083400;MD13G1084500;MD13G1081800;MD13G1082300;MD13G1082400;MD13G1082900;MD13G1083500;MD13G1081400;MD13G1083000;MD13G1082000;MD13G1082100;MD13G1081500;MD13G1083700;MD13G1081200;MD13G1084200;MD13G1082600;MD13G1081700;MD13G1081900;MD13G1081600;MD13G1084100;MD13G1081300;MD13G1084300;MD13G1082200;MD13G1083600;MD13G1082800;MD13G1082500;MD13G1083200
1790	MSTRG.10286.1	MD01G1087700;MD01G1087800;MD01G1087900;MD01G1088100
1791	MSTRG.100662.2	MD12G1189900;MD12G1189300;MD12G1189200;MD12G1190000;MD12G1189700;MD12G1189600;MD12G1189400
1792	MSTRG.141187.1	MD17G1099800;MD17G1099300;MD17G1098800;MD17G1099100;MD17G1100300;MD17G1100100;MD17G1099200;MD17G1099000;MD17G1100000;MD17G1099400;MD17G1100200;MD17G1098500;MD17G1098100;MD17G1099500;MD17G1098900;MD17G1098600;MD17G1099600;MD17G1098000;MD17G1099900;MD17G1098400;MD17G1098300;MD17G1098700
1793	MSTRG.23445.4	MD03G1067700;MD03G1067500;MD03G1067200;MD03G1066700;MD03G1066300;MD03G1068000;MD03G1066600;MD03G1067400;MD03G1066900;MD03G1066000;MD03G1067900;MD03G1066200;MD03G1066500;MD03G1066400;MD03G1067600;MD03G1067300;MD03G1068100;MD03G1067800;MD03G1067100
1794	MSTRG.20035.5	MD02G1242200;MD02G1242300;MD02G1242400;MD02G1242100;MD02G1241800;MD02G1242000;MD02G1241900
1795	MSTRG.82843.4	MD10G1190200;MD10G1189600;MD10G1190100;MD10G1191200;MD10G1190300;MD10G1189900;MD10G1191100;MD10G1190000;MD10G1190400;MD10G1190500;MD10G1191300;MD10G1189800;MD10G1189700;MD10G1190700;MD10G1190900;MD10G1190800
1796	MSTRG.37106.4	MD05G1005000;MD05G1003600;MD05G1004000;MD05G1004700;MD05G1005200;MD05G1004600;MD05G1004300;MD05G1003800;MD05G1004100;MD05G1004900;MD05G1004400;MD05G1003900
1797	MSTRG.7095.1	MD00G1204100;MD00G1203800
1798	MSTRG.133216.1	MD16G1118600;MD16G1119200;MD16G1117800;MD16G1119100;MD16G1117900;MD16G1118000;MD16G1118100;MD16G1118800;MD16G1119400;MD16G1119300;MD16G1119000;MD16G1118900;MD16G1117700;MD16G1118500;MD16G1118400;MD16G1118200;MD16G1118300
1799	MSTRG.132283.2	MD16G1080600;MD16G1079600;MD16G1081600;MD16G1080700;MD16G1080900;MD16G1079200;MD16G1080500;MD16G1079000;MD16G1079700;MD16G1081700;MD16G1081100;MD16G1080200;MD16G1080300;MD16G1081400;MD16G1079900;MD16G1079800;MD16G1079300;MD16G1081300;MD16G1080800;MD16G1080000;MD16G1079500;MD16G1079400;MD16G1081000;MD16G1081500;MD16G1080400;MD16G1080100;MD16G1079100;MD16G1081800
1800	MSTRG.92827.1	MD11G1233500;MD11G1234800;MD11G1235000;MD11G1234900;MD11G1234300;MD11G1234600;MD11G1233300;MD11G1234100;MD11G1233900;MD11G1233200;MD11G1233700;MD11G1233400;MD11G1234700;MD11G1234000;MD11G1233600;MD11G1233800
1801	MSTRG.122096.1	MD15G1170500;MD15G1170200;MD15G1169900;MD15G1170900;MD15G1170100;MD15G1169200;MD15G1169300;MD15G1170800;MD15G1170700;MD15G1169700;MD15G1169600;MD15G1171000;MD15G1169100;MD15G1170300;MD15G1169400;MD15G1170000;MD15G1169800;MD15G1170600
1802	MSTRG.62663.1	MD08G1035000;MD08G1034500;MD08G1034800;MD08G1035200;MD08G1035300;MD08G1034600;MD08G1035400;MD08G1034400;MD08G1035500;MD08G1035900
1803	MSTRG.65355.1	MD08G1135700;MD08G1135600;MD08G1135400;MD08G1135500;MD08G1136100;MD08G1134800;MD08G1134900;MD08G1134500;MD08G1135200;MD08G1135000;MD08G1136000;MD08G1135900;MD08G1134600;MD08G1135300;MD08G1134700;MD08G1136400;MD08G1136300;MD08G1135800;MD08G1135100
1804	MSTRG.37457.1	MD05G1014700;MD05G1016500;MD05G1015400;MD05G1016200;MD05G1016000;MD05G1016400;MD05G1015200;MD05G1015500;MD05G1014600;MD05G1014800;MD05G1014900;MD05G1015800;MD05G1015900
1805	MSTRG.83925.8	MD10G1231600;MD10G1233000;MD10G1232200;MD10G1232600;MD10G1233400;MD10G1232000;MD10G1233200;MD10G1233300;MD10G1232900;MD10G1231400;MD10G1231900;MD10G1233100;MD10G1232300;MD10G1231500;MD10G1232700;MD10G1231200;MD10G1233500;MD10G1232100;MD10G1232400;MD10G1232500;MD10G1232800;MD10G1231300;MD10G1231800;MD10G1233600;MD10G1231700
1806	MSTRG.12434.2	MD01G1177900;MD01G1177500;MD01G1177400;MD01G1178000;MD01G1177000;MD01G1177100;MD01G1177300;MD01G1177600;MD01G1176100;MD01G1176700;MD01G1177800;MD01G1176600;MD01G1177700;MD01G1178300;MD01G1176500;MD01G1178700;MD01G1176400;MD01G1178400;MD01G1176900;MD01G1176300;MD01G1178200;MD01G1178600;MD01G1177200;MD01G1178900;MD01G1178800;MD01G1178500;MD01G1178100
1807	MSTRG.2000.1	MD00G1063000;MD00G1062300;MD00G1061800;MD00G1062400;MD00G1062200;MD00G1062100;MD00G1061900;MD00G1062700;MD00G1062000;MD00G1062600;MD00G1062900;MD00G1062800
1808	MSTRG.21942.6	MD02G1317900;MD02G1316700;MD02G1316300;MD02G1316200;MD02G1316900;MD02G1316100;MD02G1317000;MD02G1317800;MD02G1317600;MD02G1316400;MD02G1318100;MD02G1317300;MD02G1318000;MD02G1316800;MD02G1316500;MD02G1316600;MD02G1317200;MD02G1317500
1809	MSTRG.37908.2	MD05G1028800;MD05G1028600;MD05G1029600;MD05G1028700;MD05G1028500;MD05G1029900;MD05G1030000;MD05G1030200;MD05G1029700;MD05G1029400;MD05G1029800;MD05G1028900;MD05G1029500;MD05G1029100
1810	MSTRG.38777.1	MD05G1057000;MD05G1057600;MD05G1056600;MD05G1057500;MD05G1056900;MD05G1056800;MD05G1057800;MD05G1057700;MD05G1056500;MD05G1056300
1811	MSTRG.27164.6	MD03G1189700;MD03G1189200;MD03G1189600;MD03G1190300;MD03G1190200;MD03G1189500;MD03G1190000;MD03G1189800;MD03G1189900;MD03G1189400;MD03G1189100;MD03G1190100
1812	MSTRG.142733.2	MD17G1155900;MD17G1155100;MD17G1155400;MD17G1154600;MD17G1155200;MD17G1155700;MD17G1156000;MD17G1154900;MD17G1155800;MD17G1154800;MD17G1154700;MD17G1155300;MD17G1155000
1813	MSTRG.78010.5	MD10G1037400;MD10G1036400;MD10G1037500;MD10G1037200;MD10G1037000;MD10G1036500;MD10G1036300;MD10G1036200;MD10G1037300;MD10G1036900
1814	MSTRG.22681.18	MD03G1029600;MD03G1032100;MD03G1029900;MD03G1029300;MD03G1030000;MD03G1029800;MD03G1030100;MD03G1031200;MD03G1030800;MD03G1031700;MD03G1030300;MD03G1031500;MD03G1030900;MD03G1030700;MD03G1030400;MD03G1031400;MD03G1029700;MD03G1030500;MD03G1030600;MD03G1031300;MD03G1029500;MD03G1031900;MD03G1030200;MD03G1031600;MD03G1031800;MD03G1032000;MD03G1029400
1815	MSTRG.67147.1	MD08G1187900;MD08G1188000;MD08G1188100;MD08G1187800;MD08G1187500;MD08G1187400;MD08G1187700
1816	MSTRG.110874.1	MD13G1286000;MD13G1285900;MD13G1285800
1817	MSTRG.142440.3	MD17G1148400;MD17G1148100;MD17G1148300;MD17G1147900;MD17G1147700;MD17G1148000;MD17G1147800;MD17G1148200
1818	MSTRG.79780.1	MD10G1089100;MD10G1087800;MD10G1088300;MD10G1089000;MD10G1088200;MD10G1088500;MD10G1088600;MD10G1088700;MD10G1088400;MD10G1088100;MD10G1087900;MD10G1087700;MD10G1088000;MD10G1088800
1819	MSTRG.110742.3	MD13G1284200;MD13G1284100;MD13G1283600;MD13G1283700
1820	MSTRG.6202.1	MD00G1176400;MD00G1176700;MD00G1176500;MD00G1176300;MD00G1176900;MD00G1176800
1821	MSTRG.146266.2	MD17G1270300;MD17G1270600;MD17G1270700;MD17G1270900;MD17G1271500;MD17G1270100;MD17G1271100;MD17G1271400;MD17G1270800;MD17G1271000;MD17G1271200;MD17G1270000;MD17G1271300
1822	MSTRG.95882.1	MD12G1031900;MD12G1032200;MD12G1032700;MD12G1033100;MD12G1032400;MD12G1033000;MD12G1032100;MD12G1031800;MD12G1032900;MD12G1033200;MD12G1032000;MD12G1032300
1823	MSTRG.68357.3	MD08G1227400;MD08G1229500;MD08G1228600;MD08G1228100;MD08G1228700;MD08G1227800;MD08G1229600;MD08G1228900;MD08G1229400;MD08G1227500;MD08G1229200;MD08G1227200;MD08G1228500;MD08G1227600;MD08G1228200;MD08G1228400;MD08G1227900;MD08G1227300;MD08G1227700;MD08G1228300;MD08G1229100;MD08G1229300;MD08G1229700;MD08G1228000;MD08G1229000
1824	MSTRG.64769.1	MD08G1114500;MD08G1114400;MD08G1114900;MD08G1114600;MD08G1115500;MD08G1114800;MD08G1115600;MD08G1114700;MD08G1115300;MD08G1115200;MD08G1115000;MD08G1115100
1825	MSTRG.14603.1	MD02G1032000;MD02G1031200;MD02G1033800;MD02G1031900;MD02G1033500;MD02G1032900;MD02G1034500;MD02G1033200;MD02G1034300;MD02G1031100;MD02G1031700;MD02G1031500;MD02G1032500;MD02G1031400;MD02G1031800;MD02G1033900;MD02G1032100;MD02G1033000;MD02G1032300;MD02G1033100;MD02G1034100;MD02G1032800;MD02G1034400;MD02G1031600;MD02G1033700;MD02G1032400;MD02G1034000;MD02G1032200;MD02G1032600;MD02G1033400;MD02G1032…
1826	MSTRG.35457.8	MD04G1184900;MD04G1186000;MD04G1184800;MD04G1185600;MD04G1184600;MD04G1185900;MD04G1186100;MD04G1186300;MD04G1184300;MD04G1184500;MD04G1185700;MD04G1184000;MD04G1184100;MD04G1184700;MD04G1186200;MD04G1185800;MD04G1185000;MD04G1184400;MD04G1185100
1827	MSTRG.100018.5	MD12G1167300;MD12G1165300;MD12G1165500;MD12G1166800;MD12G1166400;MD12G1165400;MD12G1165800;MD12G1164900;MD12G1166900;MD12G1165600;MD12G1165000;MD12G1164800;MD12G1166000;MD12G1167200;MD12G1164600;MD12G1166700;MD12G1167100;MD12G1164400;MD12G1165700;MD12G1167400;MD12G1166300;MD12G1164700;MD12G1165200;MD12G1166600;MD12G1167600;MD12G1166200;MD12G1164500
1828	MSTRG.51807.11	MD06G1168800;MD06G1167700;MD06G1168900;MD06G1168600;MD06G1169000;MD06G1167200;MD06G1168100;MD06G1168700;MD06G1167500;MD06G1167600
1829	MSTRG.76381.1	MD09G1267800;MD09G1268300;MD09G1268900;MD09G1269200;MD09G1268500;MD09G1269700;MD09G1269100;MD09G1268600;MD09G1267900;MD09G1268000;MD09G1269400;MD09G1269000;MD09G1268200;MD09G1269500;MD09G1268800;MD09G1268100;MD09G1268700;MD09G1268400;MD09G1269600
1830	MSTRG.18890.1	MD02G1202800;MD02G1202900;MD02G1203000;MD02G1202500;MD02G1202200;MD02G1203100
1831	MSTRG.20218.1	MD02G1248800;MD02G1248700;MD02G1247800;MD02G1248100;MD02G1247700;MD02G1248200;MD02G1248000;MD02G1248300;MD02G1247600;MD02G1248500;MD02G1248400;MD02G1247900
1832	MSTRG.22974.6	MD03G1045600;MD03G1045000;MD03G1045200;MD03G1044800;MD03G1044500;MD03G1044000;MD03G1044900;MD03G1045100;MD03G1045500;MD03G1044300;MD03G1044400;MD03G1045400;MD03G1044600;MD03G1043900;MD03G1044100;MD03G1044200
1833	MSTRG.46914.7	MD06G1004300;MD06G1005000;MD06G1004100;MD06G1003900;MD06G1004600;MD06G1003800;MD06G1004200;MD06G1003600;MD06G1004700;MD06G1005200;MD06G1005300;MD06G1005100;MD06G1003500;MD06G1004900;MD06G1005400;MD06G1004000;MD06G1003700
1834	MSTRG.83696.16	MD10G1223500;MD10G1223900;MD10G1221800;MD10G1221400;MD10G1224000;MD10G1223700;MD10G1224400;MD10G1221900;MD10G1222000;MD10G1221500;MD10G1224200;MD10G1221300;MD10G1221200;MD10G1224500;MD10G1223600;MD10G1224300;MD10G1223800;MD10G1224100;MD10G1224800;MD10G1221600
1835	MSTRG.76010.2	MD09G1255100;MD09G1256300;MD09G1255500;MD09G1255800;MD09G1254900;MD09G1255400;MD09G1255000;MD09G1255900;MD09G1255200;MD09G1254700;MD09G1254800;MD09G1255700;MD09G1254600;MD09G1256000;MD09G1255300
1836	MSTRG.143937.6	MD17G1190400;MD17G1191800;MD17G1191600;MD17G1191900;MD17G1191500;MD17G1190800;MD17G1190600;MD17G1190700;MD17G1191100;MD17G1191200;MD17G1191700;MD17G1190500;MD17G1191000;MD17G1191400
1837	MSTRG.21705.9	MD02G1307800;MD02G1307700;MD02G1308200;MD02G1307900;MD02G1309300;MD02G1307600;MD02G1308000;MD02G1308600;MD02G1308900;MD02G1308700;MD02G1309200;MD02G1308300;MD02G1308100;MD02G1307500;MD02G1309100;MD02G1308400;MD02G1308500;MD02G1308800;MD02G1309400
1838	MSTRG.125883.1	MD15G1306100;MD15G1305800;MD15G1305900
1839	MSTRG.17405.3	MD02G1158400;MD02G1157200;MD02G1157800;MD02G1157500;MD02G1156800;MD02G1157000;MD02G1158300;MD02G1157700;MD02G1158700;MD02G1158500;MD02G1157300;MD02G1156900;MD02G1159000;MD02G1157100;MD02G1158600;MD02G1157600
1840	MSTRG.104381.31	MD13G1081200;MD13G1082600;MD13G1084200;MD13G1081700;MD13G1084100;MD13G1081300;MD13G1081900;MD13G1081600;MD13G1082500;MD13G1082800;MD13G1083600;MD13G1082200;MD13G1084300;MD13G1083200;MD13G1082700;MD13G1084400;MD13G1083400;MD13G1084500;MD13G1082300;MD13G1081800;MD13G1082400;MD13G1082900;MD13G1083500;MD13G1083000;MD13G1081400;MD13G1082100;MD13G1082000;MD13G1083700;MD13G1081500
1841	MSTRG.106053.5	MD13G1144300;MD13G1145900;MD13G1145000;MD13G1145500;MD13G1144800;MD13G1144100;MD13G1144900;MD13G1145200;MD13G1146000;MD13G1145800;MD13G1145600;MD13G1144600;MD13G1144200;MD13G1144500;MD13G1145100;MD13G1144700;MD13G1144000
1842	MSTRG.112764.1	MD14G1067500;MD14G1068000;MD14G1068300;MD14G1069400;MD14G1069300;MD14G1069200;MD14G1068200;MD14G1067600;MD14G1069100;MD14G1068100;MD14G1068400;MD14G1067700;MD14G1067900
1843	MSTRG.94172.1	MD11G1281400;MD11G1280800;MD11G1281500;MD11G1280600;MD11G1280300;MD11G1281200;MD11G1281800;MD11G1280200;MD11G1280500;MD11G1281300;MD11G1280900;MD11G1281000;MD11G1280400;MD11G1281600;MD11G1281100;MD11G1280700;MD11G1281700
1844	MSTRG.75076.2	MD09G1225000;MD09G1225700;MD09G1225500;MD09G1225600;MD09G1224900;MD09G1225800;MD09G1225200
1845	MSTRG.33331.13	MD04G1101500;MD04G1101300;MD04G1100900;MD04G1101600;MD04G1101700;MD04G1101400;MD04G1101800;MD04G1101000
1846	MSTRG.70986.1	MD09G1086200;MD09G1087200;MD09G1087100;MD09G1087400;MD09G1087000;MD09G1086300;MD09G1087700;MD09G1086400;MD09G1088100;MD09G1087300;MD09G1086700;MD09G1086100;MD09G1087900;MD09G1086600;MD09G1086500;MD09G1087500;MD09G1088000
1847	MSTRG.87385.7	MD11G1035500;MD11G1035100;MD11G1035700;MD11G1034800;MD11G1033800;MD11G1034700;MD11G1033900;MD11G1034400;MD11G1033700;MD11G1035300;MD11G1035800;MD11G1034900;MD11G1035400;MD11G1034100;MD11G1035200;MD11G1035000;MD11G1034200;MD11G1034500;MD11G1034000
1848	MSTRG.31205.3	MD04G1038800;MD04G1038900;MD04G1039000;MD04G1039600;MD04G1039300;MD04G1039500;MD04G1038700;MD04G1039400;MD04G1039200;MD04G1039700;MD04G1039100
1849	MSTRG.20286.1	MD02G1252700;MD02G1252000;MD02G1253200;MD02G1253500;MD02G1252200;MD02G1251700;MD02G1252900;MD02G1252300;MD02G1251800;MD02G1252600;MD02G1252800;MD02G1251900;MD02G1253600;MD02G1253300;MD02G1252500;MD02G1253400
1850	MSTRG.12319.1	MD01G1168500;MD01G1172000;MD01G1171700;MD01G1170000;MD01G1169400;MD01G1171400;MD01G1169300;MD01G1171300;MD01G1171200;MD01G1171500;MD01G1171800;MD01G1168900;MD01G1169100;MD01G1170800;MD01G1170100;MD01G1169800;MD01G1171900;MD01G1169200;MD01G1172500;MD01G1169900;MD01G1170200;MD01G1168600;MD01G1170300;MD01G1170700;MD01G1171100;MD01G1170900;MD01G1172600;MD01G1169000;MD01G1172100;MD01G1172800;MD01G1169…
1851	MSTRG.26107.4	MD03G1156600;MD03G1156400;MD03G1156800;MD03G1156500;MD03G1156900;MD03G1156700;MD03G1156200;MD03G1156300
1852	MSTRG.63750.17	MD08G1076800;MD08G1075800;MD08G1076100;MD08G1076300;MD08G1075700;MD08G1076500;MD08G1076000;MD08G1076400;MD08G1076200;MD08G1077300;MD08G1076700;MD08G1077000;MD08G1077100;MD08G1076900
1853	MSTRG.28991.1	MD03G1252100;MD03G1251500;MD03G1253400;MD03G1253300;MD03G1252300;MD03G1253600;MD03G1254000;MD03G1254100;MD03G1251900;MD03G1251700;MD03G1254500;MD03G1252500;MD03G1252000;MD03G1252400;MD03G1254200;MD03G1253700;MD03G1253500;MD03G1254300;MD03G1253100;MD03G1252200;MD03G1253800;MD03G1254600;MD03G1253000;MD03G1254400;MD03G1251600;MD03G1253200;MD03G1252900;MD03G1253900;MD03G1251800
1854	MSTRG.133417.3	MD16G1126100;MD16G1126800;MD16G1127200;MD16G1125700;MD16G1125900;MD16G1127300;MD16G1126900;MD16G1127100;MD16G1127000;MD16G1125800;MD16G1126300;MD16G1125600;MD16G1127400;MD16G1126400;MD16G1125500;MD16G1126200;MD16G1126500
1855	MSTRG.136843.2	MD16G1239900;MD16G1239500;MD16G1239400;MD16G1239700;MD16G1239800;MD16G1239600
1856	MSTRG.103506.4	MD13G1045700;MD13G1045400;MD13G1046000;MD13G1046900;MD13G1047000;MD13G1045900;MD13G1045600;MD13G1047100;MD13G1046600;MD13G1045500;MD13G1047300;MD13G1046100;MD13G1047400;MD13G1046300;MD13G1045800;MD13G1046400;MD13G1046200;MD13G1046500;MD13G1046700;MD13G1047200;MD13G1047500
1857	MSTRG.1396.1	MD00G1043500;MD00G1043400;MD00G1043300
1858	MSTRG.2821.1	MD00G1084600;MD00G1084200;MD00G1084900;MD00G1084700;MD00G1084800;MD00G1084300;MD00G1084400;MD00G1084500
1859	MSTRG.136298.1	MD16G1223000;MD16G1222600;MD16G1223900;MD16G1224000;MD16G1223300;MD16G1222700;MD16G1222900;MD16G1223500;MD16G1223400;MD16G1223200;MD16G1223600;MD16G1223700;MD16G1224100;MD16G1223800
1860	MSTRG.38997.1	MD05G1063100;MD05G1063200;MD05G1063000;MD05G1063300;MD05G1063400
1861	MSTRG.69549.2	MD09G1025700;MD09G1027000;MD09G1026100;MD09G1026500;MD09G1027500;MD09G1025600;MD09G1026300;MD09G1026200;MD09G1026600;MD09G1025900;MD09G1027600;MD09G1025800;MD09G1027400;MD09G1026900;MD09G1025500;MD09G1026000;MD09G1026400;MD09G1026700;MD09G1027300;MD09G1027200;MD09G1026800;MD09G1027100
1862	MSTRG.37674.9	MD05G1024300;MD05G1022800;MD05G1024200;MD05G1023000;MD05G1023900;MD05G1023500;MD05G1023400;MD05G1023800;MD05G1023700;MD05G1023300;MD05G1024000;MD05G1024100;MD05G1022700;MD05G1023600;MD05G1023100;MD05G1023200
1863	MSTRG.45052.10	MD05G1290300;MD05G1288100;MD05G1288900;MD05G1288000;MD05G1290100;MD05G1289000;MD05G1288200;MD05G1289300;MD05G1290000;MD05G1289100;MD05G1289800;MD05G1290200;MD05G1288400;MD05G1289600;MD05G1287900;MD05G1288300;MD05G1289200;MD05G1289700;MD05G1290400;MD05G1289900;MD05G1289500;MD05G1287700;MD05G1289400
1864	MSTRG.108689.1	MD13G1232600;MD13G1233300;MD13G1232800;MD13G1233200;MD13G1233100;MD13G1233600;MD13G1232700;MD13G1232900;MD13G1233400;MD13G1233000;MD13G1232500;MD13G1233500
1865	MSTRG.127091.1	MD15G1342800;MD15G1342700;MD15G1342500;MD15G1342400;MD15G1342600;MD15G1343000
1866	MSTRG.67559.1	MD08G1199800;MD08G1199700;MD08G1199400;MD08G1200600;MD08G1200500;MD08G1199600;MD08G1200200;MD08G1199500;MD08G1200000;MD08G1200800;MD08G1200100;MD08G1200400;MD08G1200700;MD08G1200300
1867	MSTRG.102542.24	MD13G1004700;MD13G1005500;MD13G1006200;MD13G1003800;MD13G1004300;MD13G1005700;MD13G1003900;MD13G1005300;MD13G1004100;MD13G1005000;MD13G1004000;MD13G1005900;MD13G1004500;MD13G1004800;MD13G1006300;MD13G1003500;MD13G1005800;MD13G1006100;MD13G1003300;MD13G1004600;MD13G1005600;MD13G1004200;MD13G1004400;MD13G1003400;MD13G1005200;MD13G1003600
1868	MSTRG.126748.5	MD15G1331700;MD15G1331900;MD15G1332600;MD15G1331500;MD15G1331400;MD15G1332800;MD15G1332200;MD15G1332300;MD15G1331800;MD15G1332000;MD15G1331600
1869	MSTRG.124193.3	MD15G1248600;MD15G1248800;MD15G1248700;MD15G1248300;MD15G1248400;MD15G1249500;MD15G1249400;MD15G1249600;MD15G1249000;MD15G1249300;MD15G1248500;MD15G1249200;MD15G1248200
1870	MSTRG.8508.1	MD01G1031300;MD01G1032000;MD01G1031400;MD01G1031700
1871	MSTRG.13420.5	MD01G1221100;MD01G1221900;MD01G1221800;MD01G1221200;MD01G1222100;MD01G1221600;MD01G1222400;MD01G1221400;MD01G1222200;MD01G1220700;MD01G1222000;MD01G1220800;MD01G1221000
1872	MSTRG.22493.2	MD03G1021800;MD03G1022000;MD03G1021000;MD03G1021400;MD03G1021600;MD03G1021100;MD03G1021200;MD03G1022100;MD03G1020900;MD03G1020700;MD03G1021700;MD03G1020800;MD03G1022200
1873	MSTRG.29886.2	MD03G1295100;MD03G1294500;MD03G1294800;MD03G1294700;MD03G1292500;MD03G1292400;MD03G1293100;MD03G1292900;MD03G1292300;MD03G1293900;MD03G1294900;MD03G1293800;MD03G1295200;MD03G1293700;MD03G1292600;MD03G1292200;MD03G1294100;MD03G1294400;MD03G1294300;MD03G1294200;MD03G1293200;MD03G1293300;MD03G1293400;MD03G1294600;MD03G1295300;MD03G1292800;MD03G1292700;MD03G1293600
1874	MSTRG.126899.1	MD15G1336900;MD15G1336800;MD15G1336400
1875	MSTRG.21806.2	MD02G1312800;MD02G1311700;MD02G1313100;MD02G1312300;MD02G1312000;MD02G1312900;MD02G1312700;MD02G1312100;MD02G1313000;MD02G1313200;MD02G1311900
1876	MSTRG.41738.1	MD05G1158500;MD05G1159400;MD05G1157400;MD05G1157200;MD05G1158000;MD05G1159100;MD05G1159200;MD05G1157800;MD05G1157300;MD05G1158300;MD05G1156500;MD05G1158600;MD05G1157900;MD05G1157600;MD05G1156600;MD05G1156300;MD05G1158200;MD05G1157500;MD05G1156900;MD05G1157000;MD05G1156400;MD05G1158800;MD05G1158400;MD05G1159000;MD05G1158700;MD05G1156800;MD05G1157700;MD05G1159300;MD05G1158100
1877	MSTRG.28101.3	MD03G1221100;MD03G1219500;MD03G1221200;MD03G1220800;MD03G1219600;MD03G1221300;MD03G1220500;MD03G1221400;MD03G1220300;MD03G1221500;MD03G1219400;MD03G1220400;MD03G1219800;MD03G1220200;MD03G1219900;MD03G1219300;MD03G1220100;MD03G1219200;MD03G1219700
1878	MSTRG.138590.29	MD16G1282200;MD16G1281200;MD16G1281600;MD16G1282100;MD16G1281800;MD16G1281300;MD16G1281100;MD16G1281900;MD16G1281700;MD16G1282300;MD16G1281400;MD16G1282000
1879	MSTRG.12430.1	MD01G1177600;MD01G1177100;MD01G1177300;MD01G1176100;MD01G1176700;MD01G1178000;MD01G1177000;MD01G1177900;MD01G1177400;MD01G1177500;MD01G1176400;MD01G1176500;MD01G1176600;MD01G1177700;MD01G1177800;MD01G1176300;MD01G1175500;MD01G1176900;MD01G1178100;MD01G1175700;MD01G1177200;MD01G1175400;MD01G1175600
1880	MSTRG.32847.1	MD04G1089400;MD04G1089200;MD04G1089500;MD04G1089300
1881	MSTRG.116540.1	MD14G1194200;MD14G1194000;MD14G1194700;MD14G1195300;MD14G1195500;MD14G1193700;MD14G1195400;MD14G1195700;MD14G1195000;MD14G1194100;MD14G1193400;MD14G1195600;MD14G1193500;MD14G1193800;MD14G1195100;MD14G1195200;MD14G1193600;MD14G1193900;MD14G1194500;MD14G1194300;MD14G1194400;MD14G1194800;MD14G1195800;MD14G1194900
1882	MSTRG.62632.2	MD08G1034400;MD08G1035500;MD08G1034600;MD08G1035300;MD08G1035200;MD08G1033900;MD08G1033500;MD08G1033000;MD08G1034000;MD08G1033600;MD08G1033200;MD08G1032800;MD08G1033800;MD08G1034200;MD08G1033300;MD08G1035400;MD08G1034300;MD08G1033100;MD08G1033400;MD08G1032900;MD08G1033700;MD08G1035000;MD08G1034800;MD08G1034500
1883	MSTRG.20326.1	MD02G1254300;MD02G1255400;MD02G1255200;MD02G1255000;MD02G1255300;MD02G1254100;MD02G1255500;MD02G1255600;MD02G1253900;MD02G1254600;MD02G1254200;MD02G1254800;MD02G1254900;MD02G1254000
1884	MSTRG.124799.1	MD15G1270300;MD15G1270600;MD15G1270500;MD15G1270200;MD15G1270800;MD15G1270100;MD15G1271000;MD15G1270900;MD15G1270700
1885	MSTRG.63900.3	MD08G1084800;MD08G1084900;MD08G1084400;MD08G1083500;MD08G1084200;MD08G1084000;MD08G1083800;MD08G1082900;MD08G1083100;MD08G1083300;MD08G1082800;MD08G1083600;MD08G1084100;MD08G1082700;MD08G1084500;MD08G1083700;MD08G1083200
1886	MSTRG.72720.2	MD09G1160100;MD09G1160400;MD09G1160000;MD09G1159700;MD09G1160500;MD09G1160200;MD09G1159900;MD09G1160600;MD09G1159800;MD09G1160300
1887	MSTRG.92891.1	MD11G1237700;MD11G1237100;MD11G1236900;MD11G1237400;MD11G1236400;MD11G1236500;MD11G1237200;MD11G1237500;MD11G1236300;MD11G1237300;MD11G1236700;MD11G1236600
1888	MSTRG.62565.4	MD08G1033600;MD08G1033200;MD08G1032000;MD08G1030900;MD08G1033000;MD08G1032200;MD08G1032300;MD08G1033700;MD08G1031100;MD08G1033100;MD08G1031900;MD08G1032900;MD08G1031800;MD08G1032800;MD08G1033300;MD08G1031700;MD08G1033500;MD08G1031200;MD08G1032100;MD08G1030600;MD08G1030700;MD08G1032600;MD08G1031500;MD08G1032500;MD08G1032400;MD08G1031000;MD08G1031600;MD08G1033400;MD08G1031400;MD08G1032700;MD08G1030…
1889	MSTRG.23049.1	MD03G1049200;MD03G1048600;MD03G1046900;MD03G1047600;MD03G1047100;MD03G1047400;MD03G1047800;MD03G1046800;MD03G1048900;MD03G1047200;MD03G1048000;MD03G1049000;MD03G1047000;MD03G1049100;MD03G1047700;MD03G1049300;MD03G1048800;MD03G1048200;MD03G1047900;MD03G1047300;MD03G1048400;MD03G1048500
1890	MSTRG.42139.2	MD05G1173700;MD05G1175500;MD05G1174600;MD05G1174300;MD05G1175100;MD05G1173400;MD05G1173800;MD05G1173100;MD05G1175300;MD05G1174400;MD05G1174500;MD05G1175600;MD05G1173300;MD05G1174100;MD05G1174900;MD05G1174700;MD05G1175200;MD05G1173200;MD05G1173600;MD05G1174800;MD05G1173000;MD05G1175400;MD05G1173900;MD05G1174000;MD05G1174200;MD05G1175000
1891	MSTRG.34691.2	MD04G1156600;MD04G1156200;MD04G1156000;MD04G1155400;MD04G1155900;MD04G1155800;MD04G1155700;MD04G1156700;MD04G1155600;MD04G1156300;MD04G1155500;MD04G1156400
1892	MSTRG.91544.1	MD11G1194300;MD11G1194200;MD11G1194000;MD11G1194100
1893	MSTRG.124205.1	MD15G1249900;MD15G1248800;MD15G1248700;MD15G1248600;MD15G1249000;MD15G1249600;MD15G1249500;MD15G1249700;MD15G1249200;MD15G1249300;MD15G1250000
1894	MSTRG.19654.1	MD02G1227000;MD02G1226900;MD02G1226400;MD02G1226500;MD02G1226600;MD02G1226800;MD02G1226700
1895	MSTRG.65421.7	MD08G1137600;MD08G1136800;MD08G1137200;MD08G1136600;MD08G1136500;MD08G1137300;MD08G1137000;MD08G1137400;MD08G1136700;MD08G1137500;MD08G1136900
1896	MSTRG.93984.1	MD11G1274500;MD11G1274900;MD11G1274300;MD11G1273800;MD11G1274700;MD11G1273900;MD11G1274000;MD11G1274100;MD11G1274600;MD11G1275100;MD11G1274400;MD11G1275200;MD11G1274200
1897	MSTRG.98129.3	MD12G1104300;MD12G1104200;MD12G1105000;MD12G1104700;MD12G1104800;MD12G1105100;MD12G1104900;MD12G1104600
1898	MSTRG.106507.2	MD13G1163900;MD13G1163300;MD13G1164000;MD13G1163500;MD13G1162500;MD13G1164100;MD13G1163800;MD13G1162300;MD13G1164200;MD13G1162600;MD13G1162700;MD13G1163600;MD13G1162400
1899	MSTRG.30481.1	MD04G1012800;MD04G1012300;MD04G1012700;MD04G1013100;MD04G1011900;MD04G1012500;MD04G1011600;MD04G1013000;MD04G1012900;MD04G1011500;MD04G1012000;MD04G1011700;MD04G1011400;MD04G1012200;MD04G1012100;MD04G1011800
1900	MSTRG.85598.3	MD10G1299300;MD10G1298300;MD10G1298400;MD10G1299500;MD10G1298900;MD10G1298800;MD10G1299100;MD10G1299400;MD10G1298200;MD10G1299600;MD10G1298500;MD10G1299800;MD10G1298700;MD10G1299700
1901	MSTRG.99323.1	MD12G1138900;MD12G1139700;MD12G1140300;MD12G1139800;MD12G1139000;MD12G1139100;MD12G1139200;MD12G1139300;MD12G1140100;MD12G1138800;MD12G1140200;MD12G1139400;MD12G1139500;MD12G1139600
1902	MSTRG.102983.2	MD13G1026700;MD13G1026500;MD13G1025400;MD13G1026600;MD13G1025900;MD13G1025000;MD13G1024800;MD13G1025700;MD13G1026100;MD13G1025600;MD13G1026300;MD13G1024900;MD13G1024600;MD13G1025500;MD13G1025100;MD13G1026200;MD13G1025800;MD13G1024700;MD13G1025300;MD13G1025200;MD13G1026400
1903	MSTRG.34701.1	MD04G1158000;MD04G1158900;MD04G1158600;MD04G1157700;MD04G1158700;MD04G1157800;MD04G1157000;MD04G1156700;MD04G1158200;MD04G1158500;MD04G1158300
1904	MSTRG.104381.23	MD13G1081700;MD13G1081600;MD13G1081900;MD13G1084100;MD13G1081300;MD13G1081200;MD13G1084200;MD13G1082600;MD13G1084300;MD13G1082200;MD13G1082800;MD13G1083600;MD13G1082500;MD13G1083200;MD13G1084500;MD13G1082300;MD13G1081800;MD13G1082400;MD13G1084400;MD13G1082700;MD13G1083400;MD13G1082000;MD13G1082100;MD13G1081500;MD13G1083700;MD13G1082900;MD13G1083500;MD13G1081400;MD13G1083000
[truncated: 7,506 more rows]
