# Supplementary material for: Expression Profiles and Characteristics of Apple lncRNAs in Roots, Phloem, Leaves, Flowers, and Fruit
Source: Int J Mol Sci. 2022 May 25;23(11):5931. doi: 10.3390/ijms23115931 (PMC9180697; doi:10.3390/ijms23115931)
Supplement: Supplementary file 1 [file ijms-23-05931-s001.zip › Table S9.xlsx]

## Sheet: Sheet1
Table S9 Trans–targets genes prediction for lncRNAs
No.	LncRNA_ID	Target_mRNA_ID
1	MSTRG.30924.4	MD01G1003000;MD05G1273200;MD10G1036600;MD08G1179100;MD05G1261200;MD01G1166600;MD08G1151600;MD11G1090700;MD03G1237900;MD09G1115200;MD10G1309300;MD07G1069200;MD02G1025400;MD00G1148700
2	MSTRG.52077.1	MD11G1204300
3	MSTRG.140288.3	MD17G1125100;MD05G1300500;MD03G1145800;MD02G1253700
4	MSTRG.84454.17	MD01G1003000;MD17G1041200;MD10G1155900;MD03G1044800;MD02G1049200;MD05G1273200;MD15G1039800;MD10G1036600;MD17G1045900;MD10G1237900;MD07G1069200;MD03G1057900;MD02G1259800;MD05G1039800;MD00G1157500;MD15G1445300;MD11G1129400;MD07G1181300;MD05G1261200;MD01G1166600;MD15G1371200;MD08G1151600;MD08G1179100;MD11G1090700;MD03G1237900;MD09G1115200;MD10G1122900;MD00G1148700;MD04G1171300;MD03G1186600
5	MSTRG.91900.2	MD11G1204300
6	MSTRG.65032.12	MD11G1090700;MD05G1273200;MD13G1116300;MD05G1261200;MD08G1151600
7	MSTRG.18642.3	MD07G1111700;MD00G1093800;MD13G1253200;MD17G1041200;MD15G1210600;MD15G1210500;MD15G1039800;MD14G1233100;MD10G1155900;MD03G1044800;MD02G1049200
8	MSTRG.32552.4	MD00G1135700
9	MSTRG.40447.26	MD07G1004700
10	MSTRG.142016.1	MD11G1025100
11	MSTRG.99548.14	MD16G1235700
12	MSTRG.48281.1	MD17G1142000
13	MSTRG.35169.2	MD08G1179100;MD09G1115200;MD10G1036600;MD01G1088600;MD05G1261200;MD10G1122900;MD08G1151600;MD15G1222200
14	MSTRG.24740.2	MD11G1090700
15	MSTRG.24833.2	MD03G1285500
16	MSTRG.4994.1	MD00G1157500;MD07G1069200;MD07G1246800;MD08G1151600
17	MSTRG.50274.1	MD03G1159300
18	MSTRG.108834.3	MD05G1300500;MD03G1145800;MD02G1253700
19	MSTRG.126291.1	MD09G1230200
20	MSTRG.89349.4	MD03G1116600
21	MSTRG.2821.1	MD04G1052900;MD11G1025100
22	MSTRG.20509.10	MD03G1116600;MD16G1235700
23	MSTRG.22816.13	MD10G1207400;MD15G1021400
24	MSTRG.52024.10	MD05G1294600
25	MSTRG.23252.3	MD16G1235700
26	MSTRG.103253.3	MD16G1235700
27	MSTRG.5183.1	MD07G1262000
28	MSTRG.84454.23	MD01G1003000;MD17G1041200;MD10G1155900;MD03G1044800;MD02G1049200;MD05G1273200;MD15G1039800;MD10G1036600;MD17G1045900;MD10G1237900;MD07G1069200;MD03G1057900;MD02G1259800;MD05G1039800;MD00G1157500;MD15G1445300;MD11G1129400;MD07G1181300;MD05G1261200;MD01G1166600;MD15G1371200;MD08G1151600;MD08G1179100;MD11G1090700;MD03G1237900;MD09G1115200;MD10G1122900;MD00G1148700;MD04G1171300;MD03G1186600
29	MSTRG.79939.16	MD17G1045900;MD10G1237900;MD03G1057900;MD02G1259800;MD07G1069200;MD05G1039800;MD15G1445300;MD13G1114600;MD04G1171300;MD03G1186600
30	MSTRG.20511.1	MD02G1000200;MD13G1191600;MD15G1151900;MD16G1180400;MD02G1045600;MD15G1401500;MD12G1137700
31	MSTRG.913.13	MD09G1150500;MD09G1150600
32	MSTRG.3444.2	MD02G1174300
33	MSTRG.87954.5	MD02G1092700
34	MSTRG.5135.1	MD01G1003000;MD15G1222200;MD17G1045900;MD13G1285800;MD10G1237900;MD07G1146400;MD03G1057900;MD02G1259800;MD05G1273200;MD07G1069200;MD05G1039800;MD15G1445300;MD05G1261200;MD01G1166600;MD15G1371200;MD00G1093800;MD08G1151600;MD10G1036600;MD11G1090700;MD09G1115200;MD05G1106400;MD03G1237900;MD10G1309300
35	MSTRG.68357.3	MD06G1053200
36	MSTRG.5135.7	MD01G1003000;MD17G1045900;MD13G1285800;MD10G1237900;MD07G1146400;MD03G1057900;MD02G1259800;MD05G1273200;MD07G1069200;MD05G1039800;MD15G1222200;MD15G1445300;MD07G1181300;MD05G1261200;MD15G1371200;MD00G1093800;MD08G1151600;MD10G1036600;MD11G1090700;MD09G1115200;MD03G1237900;MD10G1309300
37	MSTRG.5521.6	MD07G1069200;MD05G1261200;MD08G1151600
38	MSTRG.76605.1	MD09G1115200;MD08G1151600
39	MSTRG.64769.2	MD01G1003000;MD05G1273200;MD10G1036600;MD15G1222200;MD11G1090700;MD03G1237900;MD10G1122900;MD10G1309300;MD09G1275600;MD02G1025400
40	MSTRG.1615.1	MD17G1045900;MD13G1285800;MD10G1237900;MD07G1146400;MD03G1057900;MD02G1259800;MD07G1069200;MD05G1039800;MD15G1445300;MD08G1151600
41	MSTRG.120237.6	MD07G1036500;MD00G1135700
42	MSTRG.4634.3	MD11G1090700
43	MSTRG.129723.7	MD01G1003000;MD05G1273200;MD10G1036600;MD15G1222200;MD00G1148700;MD03G1237900;MD11G1090700;MD01G1166600;MD05G1261200
44	MSTRG.104381.45	MD03G1116600
45	MSTRG.109357.2	MD00G1023700
46	MSTRG.40225.1	MD17G1196400
47	MSTRG.112050.2	MD09G1115200
48	MSTRG.54937.1	MD10G1309300;MD02G1025400;MD03G1237900
49	MSTRG.46305.6	MD07G1199200
50	MSTRG.28195.5	MD16G1235700
51	MSTRG.99548.9	MD03G1116600;MD16G1235700
52	MSTRG.66815.1	MD01G1088600;MD17G1191900
53	MSTRG.6080.1	MD09G1257600
54	MSTRG.135190.22	MD01G1003000;MD05G1273200;MD07G1069200;MD15G1445300;MD07G1181300;MD10G1036600;MD05G1261200;MD08G1151600;MD15G1371200;MD11G1129400;MD11G1090700;MD03G1237900;MD00G1148700;MD02G1025400
55	MSTRG.40447.4	MD03G1030600
56	MSTRG.113038.2	MD07G1004700
57	MSTRG.14972.38	MD16G1235700
58	MSTRG.58436.1	MD09G1018300
59	MSTRG.73966.2	MD17G1265200;MD14G1009400;MD03G1133900;MD12G1208200
60	MSTRG.129723.6	MD01G1003000;MD05G1273200;MD10G1036600;MD11G1090700;MD03G1237900;MD02G1025400
61	MSTRG.81271.4	MD10G1135200
62	MSTRG.134250.2	MD05G1191400;MD15G1151900;MD03G1269500;MD02G1045600;MD02G1174300
63	MSTRG.101713.1	MD10G1309300;MD02G1025400;MD10G1036600
64	MSTRG.55308.1	MD11G1055900
65	MSTRG.49998.17	MD03G1116600;MD16G1235700
66	MSTRG.73966.11	MD12G1128900
67	MSTRG.144873.3	MD05G1273200;MD01G1003000;MD10G1036600;MD11G1090700;MD03G1237900;MD05G1106400;MD10G1309300;MD09G1275600;MD02G1025400
68	MSTRG.18378.8	MD11G1090700;MD08G1179100;MD11G1129400;MD15G1371200;MD10G1042900;MD00G1093800;MD17G1191900;MD05G1273200;MD13G1116300;MD05G1261200;MD01G1166600;MD09G1115200;MD08G1151600;MD00G1148700;MD10G1122900;MD01G1088600
69	MSTRG.113461.14	MD09G1276400;MD14G1089100;MD14G1158800
70	MSTRG.143779.1	MD02G1273800
71	MSTRG.44682.2	MD16G1235700
72	MSTRG.112240.1	MD12G1137700
73	MSTRG.142016.2	MD04G1052900
74	MSTRG.65595.6	MD01G1003000;MD15G1222200;MD05G1273200;MD05G1261200;MD01G1166600;MD10G1036600;MD08G1151600;MD03G1237900;MD09G1115200;MD05G1106400;MD11G1090700;MD00G1148700;MD10G1309300;MD09G1275600;MD02G1025400
75	MSTRG.102439.9	MD08G1179100;MD01G1088600;MD05G1261200;MD01G1166600
76	MSTRG.37965.5	MD00G1135700
77	MSTRG.91296.2	MD01G1003000;MD05G1273200;MD15G1222200;MD17G1045900;MD13G1285800;MD10G1237900;MD07G1146400;MD03G1057900;MD02G1259800;MD07G1069200;MD05G1039800;MD15G1445300;MD10G1036600;MD05G1261200;MD09G1115200;MD08G1151600;MD11G1090700;MD01G1088600;MD03G1237900;MD05G1106400;MD04G1171300;MD03G1186600
78	MSTRG.27711.1	MD11G1040700;MD01G1018500;MD03G1012200
79	MSTRG.64769.3	MD17G1045900;MD13G1285800;MD10G1237900;MD07G1146400;MD03G1057900;MD02G1259800;MD05G1039800;MD15G1445300;MD07G1181300;MD08G1151600
80	MSTRG.7344.45	MD11G1055900
81	MSTRG.105264.9	MD08G1151600
82	MSTRG.88778.4	MD05G1350000
83	MSTRG.97800.7	MD02G1303000;MD02G1208600
84	MSTRG.108211.1	MD06G1080300;MD07G1291300
85	MSTRG.4145.7	MD11G1129400;MD09G1115200;MD00G1148700;MD01G1088600;MD15G1445300;MD06G1053200;MD05G1261200
86	MSTRG.69490.4	MD01G1003000;MD05G1273200;MD15G1222200;MD10G1036600;MD11G1090700;MD03G1237900;MD01G1088600;MD05G1261200;MD08G1151600;MD10G1309300;MD02G1025400
87	MSTRG.81314.45	MD04G1082700;MD05G1232000
88	MSTRG.55499.1	MD02G1000200;MD15G1151900;MD10G1126700;MD04G1088000;MD03G1032100;MD11G1226700;MD15G1090200;MD17G1266900;MD12G1137700
89	MSTRG.136150.1	MD02G1303000
90	MSTRG.18378.2	MD11G1090700;MD11G1129400;MD15G1371200;MD10G1042900;MD00G1093800;MD17G1191900;MD05G1273200;MD13G1116300;MD05G1261200;MD08G1151600;MD17G1041200;MD15G1210600;MD15G1210500;MD14G1233100;MD10G1155900;MD03G1044800;MD02G1049200;MD01G1088600;MD13G1100000
91	MSTRG.4994.2	MD07G1069200
92	MSTRG.913.27	MD09G1150500;MD09G1150600
93	MSTRG.84298.10	MD10G1207400;MD02G1290500;MD15G1071900;MD15G1021400;MD12G1033900
94	MSTRG.44610.28	MD03G1116600
95	MSTRG.9832.3	MD11G1055900
96	MSTRG.40447.2	MD07G1004700
97	MSTRG.84298.9	MD02G1290500
98	MSTRG.5097.11	MD01G1003000;MD05G1273200;MD10G1036600;MD15G1222200;MD11G1090700;MD03G1237900
99	MSTRG.137845.1	MD17G1142000
100	MSTRG.60219.2	MD13G1075700;MD13G1100000
101	MSTRG.84454.29	MD01G1003000;MD17G1041200;MD10G1155900;MD03G1044800;MD02G1049200;MD05G1273200;MD15G1039800;MD10G1036600;MD17G1045900;MD10G1237900;MD07G1069200;MD03G1057900;MD02G1259800;MD05G1039800;MD00G1157500;MD15G1445300;MD11G1129400;MD07G1181300;MD05G1261200;MD01G1166600;MD15G1371200;MD08G1151600;MD08G1179100;MD11G1090700;MD03G1237900;MD09G1115200;MD10G1122900;MD00G1148700;MD04G1171300;MD03G1186600
102	MSTRG.40268.4	MD11G1055900
103	MSTRG.75076.15	MD01G1003000;MD05G1273200;MD10G1036600;MD17G1045900;MD13G1285800;MD10G1237900;MD07G1146400;MD03G1057900;MD02G1259800;MD07G1069200;MD05G1039800;MD00G1157500;MD07G1181300;MD15G1445300;MD15G1222200;MD15G1371200;MD00G1093800;MD05G1261200;MD08G1151600;MD11G1090700;MD11G1129400;MD03G1237900;MD07G1118300;MD10G1122900;MD10G1309300;MD09G1275600;MD02G1025400
104	MSTRG.20311.6	MD07G1069200;MD00G1157500;MD15G1445300;MD07G1246800;MD15G1371200;MD05G1261200;MD08G1151600;MD15G1222200
105	MSTRG.17405.2	MD03G1032200;MD05G1340200
106	MSTRG.32772.1	MD04G1088300;MD02G1273800
107	MSTRG.108958.8	MD07G1004700;MD02G1039100
108	MSTRG.85459.6	MD00G1045900
109	MSTRG.5135.6	MD01G1003000;MD15G1222200;MD05G1261200;MD08G1151600;MD05G1273200;MD07G1181300;MD15G1371200;MD10G1036600;MD11G1090700;MD03G1237900;MD10G1309300
110	MSTRG.50231.5	MD13G1116300;MD10G1122900
111	MSTRG.120237.9	MD07G1036500;MD00G1135700
112	MSTRG.4780.13	MD01G1003000;MD05G1273200;MD10G1036600;MD08G1179100;MD15G1222200;MD11G1090700;MD09G1115200;MD01G1166600;MD00G1148700;MD07G1181300;MD03G1237900;MD01G1088600;MD02G1025400
113	MSTRG.100194.4	MD06G1155700
114	MSTRG.56716.22	MD04G1171300;MD03G1186600;MD15G1392300;MD00G1093800;MD01G1088600;MD00G1157500
115	MSTRG.64080.1	MD12G1137700
116	MSTRG.32552.5	MD00G1135700
117	MSTRG.65595.29	MD01G1003000;MD17G1041200;MD10G1155900;MD03G1044800;MD02G1049200;MD05G1273200;MD10G1036600;MD17G1045900;MD10G1237900;MD07G1069200;MD03G1057900;MD02G1259800;MD13G1285800;MD07G1146400;MD05G1261200;MD05G1039800;MD01G1166600;MD08G1151600;MD15G1445300;MD07G1181300;MD15G1222200;MD03G1237900;MD00G1148700;MD11G1090700;MD10G1309300;MD02G1025400
118	MSTRG.14972.52	MD03G1116600
119	MSTRG.14989.359	MD02G1000200;MD13G1191600;MD15G1151900;MD16G1180400;MD02G1045600;MD04G1088000;MD10G1126700;MD05G1070000;MD14G1140200;MD11G1226700;MD03G1032100;MD15G1401500;MD11G1169100;MD03G1269500;MD17G1266900;MD12G1137700
120	MSTRG.144859.1	MD10G1309300;MD02G1025400
121	MSTRG.75574.1	MD11G1025100;MD04G1052900
122	MSTRG.90357.21	MD01G1003000;MD05G1273200;MD11G1090700;MD03G1237900
123	MSTRG.9910.1	MD12G1137700
124	MSTRG.140886.38	MD03G1116600;MD16G1235700
125	MSTRG.84454.8	MD01G1003000;MD05G1273200;MD10G1036600;MD11G1090700;MD03G1237900;MD10G1122900
126	MSTRG.18378.9	MD11G1090700;MD13G1116300;MD05G1273200;MD10G1122900
127	MSTRG.7425.2	MD03G1116600
128	MSTRG.13839.1	MD12G1137700
129	MSTRG.36715.1	MD10G1309300;MD09G1275600;MD15G1222200;MD05G1106400;MD02G1025400
130	MSTRG.4780.7	MD01G1003000;MD05G1273200;MD10G1036600;MD08G1179100;MD15G1222200;MD11G1090700;MD09G1115200;MD01G1166600;MD00G1148700;MD03G1237900;MD01G1088600;MD02G1025400
131	MSTRG.135107.2	MD11G1055900;MD07G1111700
132	MSTRG.60974.1	MD13G1191600;MD04G1062300;MD03G1044100
133	MSTRG.110251.1	MD02G1000200
134	MSTRG.85484.23	MD09G1115200;MD00G1148700;MD01G1088600;MD08G1151600
135	MSTRG.122697.21	MD17G1041200;MD15G1210600;MD15G1210500;MD14G1233100;MD10G1155900;MD03G1044800;MD02G1049200;MD07G1069200;MD15G1445300;MD15G1371200;MD09G1115200
136	MSTRG.41569.1	MD14G1080300;MD16G1113400
137	MSTRG.14972.41	MD16G1235700
138	MSTRG.104381.19	MD03G1116600;MD16G1235700
139	MSTRG.88462.1	MD07G1199200
140	MSTRG.137956.5	MD03G1116600;MD16G1235700
141	MSTRG.98669.1	MD15G1366300
142	MSTRG.74239.3	MD16G1235700
143	MSTRG.86742.1	MD12G1137700
144	MSTRG.35007.4	MD00G1135700
145	MSTRG.110055.7	MD03G1116600
146	MSTRG.99548.12	MD16G1235700
147	MSTRG.63897.1	MD04G1052900
148	MSTRG.104381.18	MD03G1116600;MD16G1235700
149	MSTRG.121991.3	MD03G1285500;MD09G1256600
150	MSTRG.85484.31	MD06G1053200
151	MSTRG.44537.1	MD01G1003000;MD05G1273200;MD10G1036600;MD12G1186900;MD08G1179100;MD15G1222200;MD11G1090700;MD09G1115200;MD17G1045900;MD15G1445300;MD10G1237900;MD07G1069200;MD05G1039800;MD03G1057900;MD02G1259800;MD13G1285800;MD07G1146400;MD03G1237900;MD01G1088600;MD07G1118300;MD05G1261200;MD10G1122900;MD10G1309300;MD02G1025400
152	MSTRG.88766.10	MD15G1093000;MD00G1135700
153	MSTRG.99289.1	MD04G1062300;MD01G1151100;MD04G1052900;MD11G1025100
154	MSTRG.120237.10	MD07G1036500;MD00G1135700
155	MSTRG.7166.1	MD07G1104200
156	MSTRG.13937.1	MD05G1300500
157	MSTRG.63230.1	MD02G1174300
158	MSTRG.8695.18	MD03G1116600
159	MSTRG.56716.11	MD04G1171300;MD03G1186600;MD15G1392300;MD08G1179100;MD00G1093800;MD01G1088600;MD17G1045900;MD10G1237900;MD05G1039800;MD03G1057900;MD02G1259800;MD07G1181300;MD00G1157500;MD06G1053200;MD05G1261200;MD01G1166600
160	MSTRG.532.2	MD01G1151100;MD04G1052900
161	MSTRG.37965.1	MD07G1036500;MD00G1135700
162	MSTRG.32552.7	MD00G1135700
163	MSTRG.81189.1	MD01G1088600
164	MSTRG.8695.17	MD03G1116600
165	MSTRG.2308.4	MD01G1003000;MD05G1273200;MD10G1036600;MD15G1392300;MD08G1151600;MD11G1090700;MD05G1106400;MD03G1237900;MD07G1118300;MD10G1309300;MD02G1025400
166	MSTRG.91900.3	MD04G1036700
167	MSTRG.113127.3	MD10G1040100
168	MSTRG.81674.4	MD09G1283500
169	MSTRG.20927.2	MD10G1200600;MD00G1113000
170	MSTRG.7662.3	MD13G1247900
171	MSTRG.74239.2	MD16G1235700
172	MSTRG.796.2	MD07G1069200;MD08G1151600;MD15G1222200
173	MSTRG.65064.1	MD12G1137700
174	MSTRG.37034.1	MD04G1171300;MD03G1186600;MD05G1261200;MD01G1166600;MD08G1151600;MD01G1088600
175	MSTRG.128660.5	MD06G1106900
176	MSTRG.135190.1	MD01G1003000;MD05G1273200;MD10G1036600;MD11G1090700;MD03G1237900;MD02G1025400
177	MSTRG.99032.2	MD15G1021400;MD10G1207400;MD02G1253700
178	MSTRG.64559.5	MD16G1235700
179	MSTRG.23787.2	MD16G1267500
180	MSTRG.3181.16	MD15G1445300;MD07G1069200;MD08G1151600;MD00G1157500;MD07G1246800
181	MSTRG.110072.1	MD11G1025100;MD04G1052900
182	MSTRG.31243.2	MD12G1137700
183	MSTRG.130258.18	MD08G1151600
184	MSTRG.31231.2	MD16G1235700
185	MSTRG.49998.34	MD03G1116600;MD16G1235700
186	MSTRG.71063.3	MD10G1207400;MD01G1174700;MD12G1179300;MD15G1021400;MD02G1061800;MD09G1128000
187	MSTRG.17405.3	MD03G1032200;MD05G1340200;MD05G1294600;MD16G1267500
188	MSTRG.33212.19	MD09G1150500;MD09G1150600
189	MSTRG.100194.6	MD06G1155700
190	MSTRG.126971.2	MD15G1339000;MD11G1173700
191	MSTRG.65595.5	MD17G1041200;MD10G1155900;MD03G1044800;MD02G1049200;MD01G1003000;MD05G1273200;MD10G1036600;MD17G1045900;MD10G1237900;MD07G1069200;MD03G1057900;MD02G1259800;MD13G1285800;MD07G1146400;MD05G1261200;MD05G1039800;MD08G1151600;MD15G1445300;MD07G1181300;MD15G1222200;MD03G1237900;MD00G1148700;MD11G1090700;MD10G1122900;MD10G1309300;MD09G1275600;MD02G1025400
192	MSTRG.15899.4	MD09G1115200;MD10G1042900;MD01G1088600;MD00G1093800;MD15G1445300
193	MSTRG.64079.3	MD02G1000200;MD15G1151900;MD02G1045600;MD10G1126700;MD15G1401500;MD03G1269500;MD14G1073400
194	MSTRG.93188.4	MD10G1042900;MD01G1088600
195	MSTRG.72684.1	MD09G1127600
196	MSTRG.66028.1	MD16G1235700
197	MSTRG.55406.6	MD02G1000200;MD12G1137700
198	MSTRG.130764.1	MD13G1247900
199	MSTRG.15009.1	MD13G1191600;MD15G1115100;MD02G1000200;MD15G1151900;MD16G1135400;MD02G1045600;MD10G1126700;MD14G1140200;MD11G1169100;MD17G1266900;MD09G1005500;MD05G1350000;MD14G1073400;MD07G1182400
200	MSTRG.81674.21	MD09G1283500
201	MSTRG.33212.9	MD09G1150500;MD09G1150600;MD16G1235700
202	MSTRG.23834.1	MD00G1185800
203	MSTRG.85659.2	MD10G1301200
204	MSTRG.104381.41	MD03G1116600
205	MSTRG.74192.7	MD00G1157500;MD07G1246800;MD15G1371200;MD00G1093800;MD08G1151600
206	MSTRG.44610.43	MD03G1116600
207	MSTRG.104381.14	MD03G1116600;MD16G1235700
208	MSTRG.140886.16	MD16G1235700
209	MSTRG.144873.17	MD01G1003000;MD05G1273200;MD10G1036600;MD11G1090700;MD03G1237900;MD02G1025400
210	MSTRG.140886.47	MD03G1116600
211	MSTRG.33212.17	MD09G1150500;MD09G1150600
212	MSTRG.140886.13	MD03G1116600;MD16G1235700
213	MSTRG.33280.1	MD12G1137700
214	MSTRG.77041.2	MD17G1249000;MD05G1328100
215	MSTRG.84995.1	MD07G1262000
216	MSTRG.785.1	MD11G1102400
217	MSTRG.127801.2	MD01G1151100;MD04G1052900;MD11G1025100
218	MSTRG.143264.2	MD04G1052900
219	MSTRG.83925.8	MD07G1069200;MD15G1371200;MD05G1261200;MD08G1151600;MD15G1222200;MD09G1115200;MD01G1088600;MD13G1114600;MD04G1171300;MD03G1186600
220	MSTRG.1615.2	MD17G1045900;MD13G1285800;MD10G1237900;MD07G1146400;MD03G1057900;MD02G1259800;MD07G1069200;MD05G1039800;MD15G1445300;MD08G1151600
221	MSTRG.10690.2	MD01G1104100
222	MSTRG.97507.4	MD10G1012600;MD05G1146700;MD09G1141300
223	MSTRG.60478.3	MD07G1199200
224	MSTRG.102292.2	MD03G1116600
225	MSTRG.37965.34	MD07G1036500
226	MSTRG.69497.13	MD05G1295300
227	MSTRG.25588.3	MD10G1134400
228	MSTRG.7557.1	MD17G1147000;MD02G1273600;MD02G1267600;MD11G1105800;MD03G1168500;MD14G1059000;MD11G1055900;MD02G1294200;MD03G1166800;MD02G1260300;MD00G1172200
229	MSTRG.6437.1	MD00G1184400;MD10G1200600;MD09G1257600
230	MSTRG.7830.3	MD10G1022300
231	MSTRG.70504.1	MD06G1080300
232	MSTRG.78597.2	MD16G1180400
233	MSTRG.109669.1	MD01G1003000;MD11G1090700;MD13G1116300
234	MSTRG.85849.1	MD05G1295300
235	MSTRG.137956.23	MD03G1116600;MD16G1235700
236	MSTRG.44022.4	MD01G1003000;MD09G1163200;MD12G1175100;MD05G1273200;MD17G1045900;MD13G1285800;MD10G1237900;MD07G1146400;MD03G1057900;MD02G1259800;MD00G1157500;MD05G1039800;MD15G1445300;MD15G1371200;MD15G1222200;MD10G1036600;MD08G1151600;MD11G1090700;MD12G1186900;MD02G1025400
237	MSTRG.79690.1	MD16G1031900
238	MSTRG.86607.1	MD12G1137700
239	MSTRG.79939.4	MD01G1003000;MD05G1273200;MD10G1036600;MD15G1222200;MD11G1090700;MD03G1237900
240	MSTRG.104381.27	MD03G1116600;MD16G1235700
241	MSTRG.8162.1	MD04G1153300
242	MSTRG.136245.1	MD13G1116300
243	MSTRG.59121.2	MD15G1445300;MD08G1151600
244	MSTRG.137956.24	MD03G1116600;MD16G1235700
245	MSTRG.99548.7	MD16G1235700
246	MSTRG.913.20	MD09G1150500;MD09G1150600
247	MSTRG.29923.2	MD05G1116000;MD00G1179800;MD17G1182300;MD06G1153900;MD08G1111900
248	MSTRG.5097.20	MD15G1222200;MD10G1036600;MD09G1115200;MD07G1069200;MD01G1088600
249	MSTRG.28195.6	MD16G1235700
250	MSTRG.89750.4	MD08G1114900
251	MSTRG.10722.9	MD16G1235700
252	MSTRG.108819.1	MD03G1145800
253	MSTRG.98699.1	MD16G1156100
254	MSTRG.137956.3	MD03G1116600;MD16G1235700
255	MSTRG.99548.11	MD16G1235700
256	MSTRG.4693.1	MD11G1090700;MD05G1273200
257	MSTRG.56716.16	MD04G1171300;MD03G1186600;MD15G1392300;MD08G1179100;MD00G1093800;MD09G1115200;MD00G1148700;MD01G1088600;MD17G1045900;MD10G1237900;MD05G1039800;MD03G1057900;MD02G1259800;MD07G1181300;MD00G1157500;MD05G1261200
258	MSTRG.77065.4	MD07G1069200;MD07G1181200;MD15G1445300
259	MSTRG.8695.4	MD03G1116600
260	MSTRG.104381.17	MD03G1116600;MD16G1235700
261	MSTRG.90357.4	MD01G1003000;MD05G1273200;MD11G1090700;MD03G1237900
262	MSTRG.4942.4	MD00G1135700
263	MSTRG.105569.1	MD02G1008500
264	MSTRG.65032.13	MD11G1090700;MD15G1371200;MD00G1093800;MD01G1088600;MD17G1191900;MD05G1273200;MD05G1261200;MD13G1116300;MD08G1151600;MD15G1222200
265	MSTRG.109081.5	MD13G1244800
266	MSTRG.13413.9	MD09G1115200;MD08G1151600
267	MSTRG.129933.1	MD10G1207400;MD15G1021400;MD15G1071900
268	MSTRG.54542.19	MD07G1042800;MD05G1130900
269	MSTRG.99548.18	MD16G1235700
270	MSTRG.104381.21	MD03G1116600;MD16G1235700
271	MSTRG.29033.2	MD11G1143200
272	MSTRG.101298.3	MD16G1235700
273	MSTRG.44682.9	MD16G1235700
274	MSTRG.67853.1	MD07G1187700
275	MSTRG.33029.1	MD07G1262000
276	MSTRG.29096.5	MD03G1257400;MD11G1278000
277	MSTRG.129723.2	MD01G1003000;MD05G1273200;MD10G1036600;MD11G1090700;MD03G1237900;MD02G1025400
278	MSTRG.15384.48	MD13G1086800
279	MSTRG.127196.1	MD11G1173700
280	MSTRG.20509.12	MD03G1116600;MD16G1235700
281	MSTRG.88342.5	MD11G1079900
282	MSTRG.88770.1	MD16G1180400;MD02G1217500;MD12G1137700
283	MSTRG.83925.2	MD01G1003000;MD05G1273200;MD10G1036600;MD15G1222200;MD11G1090700;MD03G1237900;MD02G1025400
284	MSTRG.119556.1	MD02G1000200;MD15G1151900;MD04G1088000;MD02G1045600;MD10G1126700;MD15G1401500;MD14G1140200;MD11G1226700;MD17G1266900;MD12G1137700
285	MSTRG.96408.2	MD05G1130900
286	MSTRG.13840.4	MD12G1137700
287	MSTRG.34864.3	MD06G1155700
288	MSTRG.104381.26	MD03G1116600;MD16G1235700
289	MSTRG.16096.2	MD02G1000200;MD10G1126700;MD02G1045600;MD11G1169100;MD17G1266900;MD05G1350000;MD05G1191400;MD12G1137700;MD15G1395000
290	MSTRG.78010.25	MD16G1235700
291	MSTRG.90934.4	MD10G1126700
292	MSTRG.65032.11	MD11G1090700;MD00G1093800;MD15G1371200;MD17G1191900;MD05G1273200;MD13G1116300;MD05G1261200;MD08G1151600;MD01G1088600
293	MSTRG.81314.49	MD04G1082700;MD05G1232000
294	MSTRG.88766.9	MD15G1093000;MD00G1135700
295	MSTRG.120237.2	MD07G1036500;MD00G1135700
296	MSTRG.13506.1	MD09G1276400
297	MSTRG.44022.6	MD08G1151600;MD15G1222200
298	MSTRG.137956.16	MD03G1116600;MD16G1235700
299	MSTRG.65595.20	MD01G1003000;MD05G1273200;MD10G1036600;MD03G1237900;MD11G1090700;MD02G1025400
300	MSTRG.96580.1	MD11G1108500
301	MSTRG.87116.1	MD10G1134400
302	MSTRG.123698.17	MD17G1041200;MD15G1210600;MD15G1210500;MD14G1233100;MD10G1155900;MD03G1044800;MD02G1049200;MD15G1039800;MD13G1259500;MD10G1009600;MD12G1175100;MD15G1177200;MD17G1045900;MD13G1285800;MD10G1237900;MD07G1146400;MD03G1057900;MD02G1259800;MD07G1069200;MD05G1039800;MD07G1181200;MD00G1157500;MD15G1445300;MD07G1246800;MD07G1181300;MD15G1371200;MD00G1093800;MD05G1261200;MD01G1166600;MD08G1151600;MD15G1222…
303	MSTRG.109421.1	MD01G1003000;MD05G1273200;MD07G1111700
304	MSTRG.15454.1	MD07G1036500
305	MSTRG.62565.3	MD10G1207400
306	MSTRG.73151.1	MD05G1273200;MD03G1237900;MD11G1090700;MD02G1025400
307	MSTRG.140886.5	MD16G1235700
308	MSTRG.16306.1	MD12G1137700
309	MSTRG.45628.2	MD03G1145800
310	MSTRG.64559.7	MD16G1235700
311	MSTRG.68337.5	MD16G1235700
312	MSTRG.128660.1	MD06G1106900
313	MSTRG.58857.17	MD15G1093000
314	MSTRG.79939.7	MD01G1003000;MD05G1273200;MD15G1222200;MD10G1036600;MD11G1090700;MD09G1115200;MD00G1148700;MD05G1106400;MD03G1237900;MD01G1088600;MD07G1118300;MD05G1261200;MD10G1309300;MD02G1025400
315	MSTRG.128436.1	MD16G1170800;MD13G1190500;MD10G1309300;MD02G1025400
316	MSTRG.59047.49	MD11G1055900
317	MSTRG.6590.2	MD00G1187400
318	MSTRG.50231.2	MD11G1294700;MD13G1116300;MD10G1122900
319	MSTRG.29923.15	MD05G1116000;MD00G1179800;MD06G1153900
320	MSTRG.79939.8	MD01G1003000;MD05G1273200;MD11G1129400;MD10G1036600;MD15G1222200;MD11G1090700;MD09G1115200;MD00G1148700;MD03G1237900;MD07G1118300;MD05G1261200;MD02G1025400
321	MSTRG.88766.12	MD15G1093000;MD00G1135700
322	MSTRG.78680.1	MD13G1009700;MD05G1146700
323	MSTRG.131759.3	MD08G1151000
324	MSTRG.20509.8	MD03G1116600;MD16G1235700
325	MSTRG.8695.16	MD03G1116600
326	MSTRG.98767.2	MD05G1215700
327	MSTRG.94308.1	MD00G1135700
328	MSTRG.988.1	MD13G1075700;MD11G1090700
329	MSTRG.112051.1	MD01G1003000;MD05G1273200;MD11G1090700;MD10G1036600;MD03G1237900
330	MSTRG.56129.33	MD15G1122600
331	MSTRG.99548.13	MD16G1235700
332	MSTRG.75173.1	MD11G1090700
333	MSTRG.4933.1	MD06G1029100;MD14G1122400
334	MSTRG.75076.2	MD01G1003000;MD05G1273200;MD15G1222200;MD10G1036600;MD11G1090700;MD03G1237900;MD16G1023900;MD10G1309300;MD02G1025400
335	MSTRG.84454.12	MD01G1003000;MD05G1273200;MD15G1222200;MD17G1045900;MD10G1237900;MD07G1069200;MD03G1057900;MD02G1259800;MD05G1039800;MD05G1261200;MD01G1166600;MD15G1445300;MD08G1151600;MD07G1181300;MD15G1371200;MD00G1093800;MD10G1036600;MD11G1090700;MD03G1237900;MD09G1115200;MD05G1106400;MD00G1148700;MD09G1275600;MD02G1025400;MD01G1088600
336	MSTRG.75076.21	MD17G1045900;MD13G1285800;MD10G1237900;MD07G1146400;MD03G1057900;MD02G1259800;MD07G1069200;MD05G1039800;MD00G1157500;MD07G1181300;MD15G1445300;MD15G1371200;MD00G1093800;MD08G1151600;MD15G1222200;MD11G1129400;MD10G1122900
337	MSTRG.44682.7	MD16G1235700
338	MSTRG.41566.203	MD12G1128900
339	MSTRG.4780.12	MD01G1003000;MD05G1273200;MD10G1036600;MD08G1179100;MD15G1222200;MD11G1090700;MD09G1115200;MD01G1166600;MD00G1148700;MD03G1237900;MD01G1088600;MD02G1025400
340	MSTRG.73966.4	MD12G1128900
341	MSTRG.65032.4	MD11G1090700;MD15G1371200;MD17G1191900;MD05G1273200;MD13G1116300;MD05G1261200;MD08G1151600;MD01G1088600
342	MSTRG.83696.10	MD10G1221800
343	MSTRG.129479.5	MD16G1235700
344	MSTRG.121529.1	MD17G1125100;MD05G1300500;MD03G1145800;MD02G1253700;MD07G1018000
345	MSTRG.10845.2	MD10G1134400
346	MSTRG.75076.18	MD12G1175100;MD01G1003000;MD05G1273200;MD10G1036600;MD17G1045900;MD13G1285800;MD10G1237900;MD07G1146400;MD03G1057900;MD02G1259800;MD07G1181200;MD07G1069200;MD05G1039800;MD07G1181300;MD15G1445300;MD15G1222200;MD16G1237900;MD05G1261200;MD01G1166600;MD15G1371200;MD08G1151600;MD00G1093800;MD11G1129400;MD11G1090700;MD03G1237900;MD07G1118300;MD10G1122900;MD10G1309300;MD09G1275600;MD02G1025400
347	MSTRG.2678.1	MD10G1134400
348	MSTRG.14972.55	MD03G1116600;MD16G1235700
349	MSTRG.76604.1	MD01G1003000;MD05G1273200;MD11G1090700;MD03G1237900;MD15G1222200;MD02G1025400
350	MSTRG.53411.1	MD07G1268500;MD01G1110600
351	MSTRG.83696.14	MD10G1221800
352	MSTRG.43797.1	MD17G1045900;MD13G1285800;MD10G1237900;MD07G1146400;MD03G1057900;MD02G1259800;MD07G1069200;MD05G1039800;MD00G1157500;MD15G1445300;MD07G1246800;MD08G1179100;MD05G1261200;MD00G1093800;MD08G1151600;MD09G1115200
353	MSTRG.135190.25	MD01G1003000;MD05G1273200;MD07G1069200;MD15G1445300;MD07G1181300;MD10G1036600;MD05G1261200;MD08G1151600;MD15G1371200;MD11G1129400;MD11G1090700;MD03G1237900;MD00G1148700;MD02G1025400
354	MSTRG.44022.3	MD09G1163200;MD12G1175100;MD01G1003000;MD17G1045900;MD13G1285800;MD10G1237900;MD07G1146400;MD03G1057900;MD02G1259800;MD00G1157500;MD05G1039800;MD15G1445300;MD15G1222200;MD15G1371200;MD10G1036600;MD08G1151600;MD11G1090700;MD12G1186900;MD07G1118300;MD02G1025400
355	MSTRG.129723.9	MD07G1069200;MD15G1445300;MD15G1371200;MD08G1151600;MD04G1171300;MD03G1186600
356	MSTRG.79939.9	MD01G1003000;MD05G1273200;MD15G1222200;MD10G1036600;MD11G1090700;MD17G1045900;MD15G1445300;MD10G1237900;MD07G1069200;MD05G1039800;MD03G1057900;MD02G1259800;MD03G1237900;MD05G1261200;MD08G1151600
357	MSTRG.5097.12	MD01G1003000;MD05G1273200;MD15G1222200;MD10G1036600;MD11G1090700;MD09G1115200;MD00G1148700;MD07G1069200;MD05G1106400;MD03G1237900;MD01G1088600
358	MSTRG.56129.23	MD15G1122600
359	MSTRG.123045.2	MD05G1300500;MD03G1145800
360	MSTRG.57455.19	MD07G1036500;MD00G1135700
361	MSTRG.132216.2	MD01G1003000;MD05G1273200;MD15G1222200;MD10G1036600;MD09G1115200;MD03G1237900;MD11G1090700;MD00G1148700;MD01G1088600;MD05G1261200
362	MSTRG.84298.6	MD10G1207400;MD15G1071900;MD15G1021400;MD12G1033900
363	MSTRG.131788.2	MD03G1259800
364	MSTRG.119610.1	MD03G1285500;MD15G1373100
365	MSTRG.106502.1	MD15G1371200;MD00G1157500;MD07G1181300;MD07G1246800
366	MSTRG.105948.1	MD11G1173700
367	MSTRG.109616.10	MD11G1204100
368	MSTRG.83484.1	MD17G1142000
369	MSTRG.15899.10	MD00G1093800;MD09G1115200;MD01G1088600
370	MSTRG.20509.15	MD03G1116600
371	MSTRG.104381.15	MD03G1116600;MD16G1235700
372	MSTRG.5097.3	MD01G1003000;MD11G1090700;MD03G1237900
373	MSTRG.17165.2	MD13G1116300
374	MSTRG.42120.2	MD06G1126700
375	MSTRG.86743.3	MD04G1052900
376	MSTRG.13420.4	MD03G1116600;MD16G1235700
377	MSTRG.13846.1	MD11G1025100;MD01G1151100;MD05G1248400
378	MSTRG.80984.2	MD10G1012600;MD05G1146700;MD03G1259800
379	MSTRG.86608.1	MD12G1137700
380	MSTRG.54675.1	MD03G1138600;MD05G1337100;MD03G1217900;MD05G1046600;MD11G1171900;MD06G1214400;MD04G1174600;MD14G1093700;MD10G1150300;MD01G1225700;MD08G1048200;MD17G1036400;MD08G1209600
381	MSTRG.137353.3	MD12G1137700
382	MSTRG.76605.5	MD07G1069200
383	MSTRG.101713.2	MD10G1309300;MD03G1059300;MD02G1025400
384	MSTRG.2047.2	MD09G1257600
385	MSTRG.44537.24	MD08G1179100;MD09G1115200;MD17G1045900;MD15G1445300;MD10G1237900;MD07G1069200;MD05G1039800;MD03G1057900;MD02G1259800;MD13G1285800;MD07G1146400;MD01G1088600
386	MSTRG.99548.10	MD16G1235700
387	MSTRG.122697.15	MD01G1003000;MD05G1273200;MD17G1045900;MD10G1237900;MD07G1069200;MD03G1057900;MD02G1259800;MD13G1285800;MD07G1146400;MD15G1445300;MD10G1036600;MD07G1181300;MD00G1157500;MD07G1246800;MD11G1090700;MD09G1115200;MD03G1237900;MD11G1129400;MD00G1148700;MD02G1025400
388	MSTRG.102246.1	MD10G1309300;MD09G1275600;MD02G1025400;MD05G1106400;MD03G1237900;MD03G1059300
389	MSTRG.70838.2	MD03G1145800;MD10G1134400
390	MSTRG.112368.1	MD04G1052900
391	MSTRG.64559.3	MD16G1235700
392	MSTRG.123843.1	MD07G1199200
393	MSTRG.72379.1	MD10G1309300
394	MSTRG.28195.1	MD16G1235700
395	MSTRG.12037.1	MD10G1036600;MD02G1025400
396	MSTRG.49998.25	MD03G1116600
397	MSTRG.109352.1	MD02G1045500
398	MSTRG.91904.1	MD12G1137700
399	MSTRG.43920.2	MD11G1169100;MD04G1088000
400	MSTRG.44610.13	MD03G1116600;MD16G1235700
401	MSTRG.144873.4	MD01G1003000;MD05G1273200;MD10G1036600;MD11G1090700;MD03G1237900;MD10G1309300;MD02G1025400
402	MSTRG.34864.2	MD06G1155700
403	MSTRG.43413.2	MD12G1137700
404	MSTRG.44610.29	MD16G1235700
405	MSTRG.91673.17	MD03G1116600
406	MSTRG.8695.3	MD03G1116600
407	MSTRG.140886.14	MD03G1116600;MD16G1235700
408	MSTRG.27289.1	MD15G1030400
409	MSTRG.85850.2	MD05G1295300
410	MSTRG.1564.21	MD00G1048200
411	MSTRG.66115.46	MD07G1069200;MD08G1151600;MD15G1222200
412	MSTRG.86793.5	MD03G1116600;MD10G1036600;MD16G1237900;MD15G1222200;MD07G1042900;MD13G1058400;MD10G1309300
413	MSTRG.84454.33	MD01G1003000;MD05G1273200;MD15G1222200;MD05G1261200;MD08G1151600;MD07G1181300;MD15G1371200;MD10G1036600;MD11G1090700;MD03G1237900;MD09G1115200;MD00G1148700
414	MSTRG.66640.1	MD00G1113000;MD10G1200600
415	MSTRG.77344.1	MD15G1001800
416	MSTRG.132229.1	MD05G1273200
417	MSTRG.46305.8	MD07G1199200
418	MSTRG.5227.1	MD07G1036500;MD16G1235700
419	MSTRG.14972.35	MD16G1235700
420	MSTRG.129154.1	MD12G1137700
421	MSTRG.33212.4	MD09G1150500;MD09G1150600
422	MSTRG.49998.14	MD03G1116600;MD16G1235700
423	MSTRG.81317.2	MD00G1135700;MD15G1093000;MD09G1008200
424	MSTRG.64559.2	MD16G1235700
425	MSTRG.913.3	MD09G1150500;MD09G1150600
426	MSTRG.55148.32	MD16G1235700
427	MSTRG.104381.20	MD03G1116600;MD16G1235700
428	MSTRG.49998.5	MD03G1116600;MD16G1235700
429	MSTRG.10722.23	MD16G1235700
430	MSTRG.101298.1	MD16G1235700
431	MSTRG.40447.24	MD07G1004700
432	MSTRG.30924.8	MD01G1003000;MD15G1222200;MD05G1273200;MD10G1036600;MD05G1261200;MD08G1151600;MD11G1090700;MD05G1106400;MD03G1237900;MD10G1309300;MD09G1275600;MD02G1025400;MD00G1148700
433	MSTRG.97278.2	MD17G1142000;MD10G1042900;MD15G1392300;MD01G1088600
434	MSTRG.31060.9	MD16G1235700
435	MSTRG.100586.11	MD15G1445300;MD17G1045900;MD10G1237900;MD07G1069200;MD03G1057900;MD02G1259800;MD05G1039800;MD05G1261200;MD01G1166600;MD08G1151600
436	MSTRG.19310.4	MD03G1116600;MD16G1235700
437	MSTRG.104381.23	MD03G1116600;MD16G1235700
438	MSTRG.91181.1	MD16G1170800;MD13G1190500;MD10G1309300;MD02G1025400
439	MSTRG.75244.1	MD05G1191400;MD05G1053500;MD05G1350000;MD10G1126700
440	MSTRG.137956.14	MD03G1116600;MD16G1235700
441	MSTRG.141761.4	MD03G1116600
442	MSTRG.76051.6	MD06G1220400
443	MSTRG.40268.1	MD11G1055900
444	MSTRG.6001.1	MD11G1090700;MD08G1179100;MD04G1171300;MD03G1186600;MD05G1273200;MD17G1191900;MD09G1115200;MD08G1151600;MD13G1116300;MD00G1148700;MD01G1088600;MD10G1122900
445	MSTRG.128660.3	MD06G1106900
446	MSTRG.37674.6	MD06G1155700
447	MSTRG.38064.2	MD11G1090700
448	MSTRG.120721.2	MD11G1303500
449	MSTRG.113388.5	MD15G1093000
450	MSTRG.59035.3	MD10G1207400;MD12G1033900
451	MSTRG.108717.1	MD05G1146700
452	MSTRG.66815.4	MD00G1157500;MD07G1246800;MD00G1093800;MD08G1151600
453	MSTRG.84454.18	MD01G1003000;MD05G1273200;MD17G1045900;MD10G1237900;MD07G1069200;MD03G1057900;MD02G1259800;MD05G1039800;MD10G1036600;MD05G1261200;MD15G1445300;MD08G1151600;MD07G1181300;MD15G1371200;MD08G1179100;MD11G1090700;MD03G1237900;MD09G1115200;MD00G1148700;MD10G1122900
454	MSTRG.54766.1	MD16G1118700;MD14G1233300;MD07G1104200;MD13G1116300;MD15G1371200;MD00G1093800
455	MSTRG.71999.1	MD13G1116300;MD11G1090700
456	MSTRG.38064.1	MD11G1090700
457	MSTRG.140886.35	MD03G1116600;MD16G1235700
458	MSTRG.84453.2	MD16G1235700
459	MSTRG.44682.31	MD03G1116600;MD10G1207400;MD16G1235700
460	MSTRG.104381.44	MD03G1116600;MD16G1235700
461	MSTRG.89856.1	MD07G1069200;MD15G1371200;MD08G1151600
462	MSTRG.14286.2	MD05G1261200;MD01G1166600;MD08G1151600;MD15G1371200;MD01G1088600
463	MSTRG.46305.7	MD07G1199200
464	MSTRG.54542.6	MD07G1042800
465	MSTRG.93001.1	MD11G1215800
466	MSTRG.76606.1	MD17G1045900;MD10G1237900;MD03G1057900;MD02G1259800;MD07G1069200;MD05G1039800;MD15G1445300;MD04G1171300;MD03G1186600
467	MSTRG.49644.1	MD07G1279600
468	MSTRG.94329.1	MD17G1045900;MD10G1237900;MD03G1057900;MD02G1259800;MD07G1069200;MD05G1039800;MD15G1445300;MD13G1114600;MD04G1171300;MD03G1186600
469	MSTRG.84298.8	MD10G1207400;MD02G1290500;MD15G1071900;MD15G1021400;MD12G1033900
470	MSTRG.31663.6	MD16G1235700
471	MSTRG.84454.24	MD01G1003000;MD05G1273200;MD10G1036600;MD11G1090700;MD03G1237900;MD10G1122900
472	MSTRG.4780.16	MD01G1003000;MD05G1273200;MD10G1036600;MD15G1222200;MD11G1090700;MD03G1237900;MD02G1025400
473	MSTRG.115876.4	MD14G1168000;MD01G1104100
474	MSTRG.77683.19	MD11G1055900
475	MSTRG.141663.1	MD11G1043700
476	MSTRG.38064.3	MD16G1118700;MD14G1233300;MD07G1104200;MD13G1116300;MD11G1090700;MD13G1100000
477	MSTRG.65032.2	MD11G1090700;MD15G1371200;MD17G1191900;MD05G1273200;MD13G1116300;MD05G1261200;MD08G1151600;MD01G1088600
478	MSTRG.86798.2	MD11G1006000
479	MSTRG.44537.23	MD08G1179100;MD09G1115200;MD17G1045900;MD15G1445300;MD10G1237900;MD07G1069200;MD05G1039800;MD03G1057900;MD02G1259800;MD13G1285800;MD07G1146400;MD01G1088600;MD05G1261200;MD10G1122900
480	MSTRG.70856.1	MD13G1116300;MD05G1273200;MD10G1122900
481	MSTRG.466.2	MD01G1003000;MD05G1273200;MD03G1237900
482	MSTRG.8695.20	MD03G1116600
483	MSTRG.128988.3	MD11G1281800
484	MSTRG.23445.1	MD03G1145800
485	MSTRG.41478.2	MD12G1137700
486	MSTRG.146375.5	MD11G1102400
487	MSTRG.4780.14	MD01G1003000;MD05G1273200;MD17G1045900;MD13G1285800;MD10G1237900;MD07G1146400;MD03G1057900;MD02G1259800;MD07G1069200;MD05G1039800;MD07G1181200;MD10G1036600;MD00G1157500;MD15G1445300;MD07G1246800;MD08G1179100;MD05G1261200;MD01G1166600;MD08G1151600;MD11G1090700;MD09G1115200;MD00G1148700;MD03G1237900;MD10G1122900;MD04G1171300;MD03G1186600;MD01G1088600;MD10G1309300;MD02G1025400
488	MSTRG.913.21	MD09G1150500;MD09G1150600
489	MSTRG.10722.25	MD16G1235700
490	MSTRG.66053.2	MD15G1115100;MD11G1169100
491	MSTRG.32773.2	MD03G1116600;MD16G1235700
492	MSTRG.77605.7	MD10G1114700
493	MSTRG.15657.2	MD16G1235700
494	MSTRG.95553.1	MD03G1116600;MD16G1235700
495	MSTRG.91765.3	MD02G1253700
496	MSTRG.106584.1	MD10G1309300;MD16G1032400;MD09G1275600
497	MSTRG.109616.8	MD11G1204100
498	MSTRG.76604.2	MD01G1003000;MD05G1273200;MD11G1090700;MD03G1237900;MD15G1222200;MD02G1025400
499	MSTRG.18378.11	MD11G1129400;MD10G1042900;MD00G1093800;MD17G1191900;MD05G1261200;MD08G1151600;MD17G1041200;MD15G1210600;MD15G1210500;MD14G1233100;MD10G1155900;MD03G1044800;MD02G1049200;MD01G1088600
500	MSTRG.5097.16	MD01G1003000;MD05G1273200;MD10G1036600;MD15G1222200;MD11G1090700;MD09G1115200;MD15G1210600;MD15G1210500;MD14G1233100;MD13G1285800;MD07G1146400;MD00G1148700;MD17G1045900;MD17G1041200;MD15G1445300;MD10G1237900;MD10G1155900;MD07G1069200;MD05G1039800;MD03G1057900;MD03G1044800;MD02G1259800;MD02G1049200;MD03G1237900;MD01G1088600
501	MSTRG.61340.2	MD03G1116600
502	MSTRG.116743.4	MD09G1150500
503	MSTRG.4780.18	MD01G1003000;MD05G1273200;MD17G1045900;MD13G1285800;MD10G1237900;MD07G1146400;MD03G1057900;MD02G1259800;MD07G1069200;MD05G1039800;MD10G1036600;MD00G1157500;MD15G1445300;MD07G1246800;MD07G1181300;MD08G1179100;MD15G1222200;MD05G1261200;MD01G1166600;MD08G1151600;MD11G1090700;MD09G1115200;MD00G1148700;MD03G1237900;MD12G1186900;MD04G1171300;MD03G1186600;MD01G1088600;MD10G1309300;MD02G1025400
504	MSTRG.124193.3	MD05G1146700
505	MSTRG.17405.4	MD03G1032200;MD05G1340200
506	MSTRG.81333.1	MD09G1222400;MD06G1220400
507	MSTRG.15899.7	MD08G1179100;MD00G1093800;MD09G1115200;MD01G1088600;MD17G1045900;MD10G1237900;MD05G1039800;MD03G1057900;MD02G1259800;MD00G1157500;MD07G1181300
508	MSTRG.3511.1	MD07G1213900;MD05G1012700;MD03G1259800
509	MSTRG.33212.10	MD09G1150500;MD09G1150600
510	MSTRG.9832.2	MD11G1055900
511	MSTRG.93661.1	MD03G1120800;MD11G1139600
512	MSTRG.95553.2	MD16G1235700
513	MSTRG.24683.2	MD06G1000400
514	MSTRG.99548.8	MD03G1116600;MD16G1235700
515	MSTRG.2214.6	MD13G1116300;MD14G1233300
516	MSTRG.67010.1	MD12G1137700
517	MSTRG.146567.4	MD03G1116600
518	MSTRG.56587.3	MD03G1116600
519	MSTRG.24119.2	MD16G1135400;MD15G1151900;MD05G1070000;MD03G1269500;MD02G1045600
520	MSTRG.113127.2	MD10G1040100
521	MSTRG.113879.5	MD13G1086800
522	MSTRG.110055.6	MD03G1116600
523	MSTRG.53956.1	MD15G1093000;MD00G1135700
524	MSTRG.139274.16	MD13G1027900;MD10G1134400
525	MSTRG.142104.2	MD12G1137700
526	MSTRG.109638.1	MD01G1003000;MD05G1273200;MD10G1036600;MD11G1090700;MD03G1237900
527	MSTRG.83925.7	MD07G1069200;MD15G1371200;MD05G1261200;MD08G1151600;MD15G1222200;MD09G1115200;MD01G1088600;MD13G1114600;MD04G1171300;MD03G1186600
528	MSTRG.136091.3	MD13G1253200;MD01G1149400
529	MSTRG.143154.1	MD02G1000200;MD10G1126700
530	MSTRG.73966.5	MD12G1128900
531	MSTRG.1615.4	MD17G1045900;MD10G1237900;MD03G1057900;MD02G1259800;MD07G1069200;MD05G1039800;MD15G1445300
532	MSTRG.88766.11	MD15G1093000;MD00G1135700
533	MSTRG.28195.7	MD16G1235700
534	MSTRG.10025.1	MD15G1445300;MD07G1069200;MD01G1088600;MD05G1261200;MD01G1166600
535	MSTRG.146364.101	MD07G1036500
536	MSTRG.105101.1	MD11G1090700
537	MSTRG.44682.4	MD16G1235700
538	MSTRG.42120.1	MD11G1143200
539	MSTRG.44610.54	MD03G1116600
540	MSTRG.73889.2	MD01G1003000;MD05G1273200;MD10G1036600;MD15G1222200;MD07G1246800;MD00G1157500;MD11G1090700;MD03G1237900;MD07G1118300;MD10G1122900;MD16G1023900;MD10G1309300;MD09G1275600;MD02G1025400
541	MSTRG.2308.5	MD15G1371200;MD08G1151600;MD15G1222200
542	MSTRG.56716.15	MD04G1171300;MD03G1186600;MD15G1392300;MD01G1088600;MD08G1179100;MD00G1093800;MD05G1261200;MD01G1166600
543	MSTRG.74403.1	MD00G1157500;MD07G1246800;MD08G1151600
544	MSTRG.19547.1	MD04G1052900;MD11G1025100
545	MSTRG.49998.8	MD16G1235700
546	MSTRG.46305.2	MD07G1199200
547	MSTRG.19213.2	MD02G1045600;MD05G1350000
548	MSTRG.4418.3	MD13G1086800
549	MSTRG.83885.1	MD17G1028900
550	MSTRG.56716.23	MD04G1171300;MD03G1186600;MD15G1392300;MD00G1093800;MD01G1088600;MD00G1157500
551	MSTRG.15657.5	MD03G1116600
552	MSTRG.1063.5	MD03G1116600
553	MSTRG.146318.5	MD15G1093000;MD00G1135700
554	MSTRG.913.6	MD16G1235700
555	MSTRG.36730.2	MD15G1071900
556	MSTRG.91900.1	MD11G1204300
557	MSTRG.33212.1	MD09G1150500;MD09G1150600;MD16G1235700
558	MSTRG.113873.1	MD10G1022300
559	MSTRG.142453.3	MD03G1269500;MD02G1217500
560	MSTRG.104381.7	MD03G1116600
561	MSTRG.44682.40	MD16G1235700
562	MSTRG.48962.4	MD03G1237900;MD05G1273200;MD01G1003000;MD09G1275600;MD02G1025400;MD10G1309300
563	MSTRG.64559.4	MD16G1235700
564	MSTRG.15899.9	MD08G1179100;MD00G1093800;MD09G1115200;MD01G1088600;MD17G1045900;MD10G1237900;MD05G1039800;MD03G1057900;MD02G1259800;MD00G1157500;MD07G1181300
565	MSTRG.34736.17	MD03G1116600
566	MSTRG.69055.2	MD12G1137700
567	MSTRG.40447.23	MD07G1004700
568	MSTRG.93188.3	MD08G1179100;MD08G1151600;MD05G1261200;MD09G1115200;MD01G1088600
569	MSTRG.20980.2	MD03G1116600
570	MSTRG.50231.4	MD13G1116300;MD10G1122900
571	MSTRG.20285.1	MD09G1150500;MD09G1150600
572	MSTRG.144873.18	MD05G1273200;MD01G1003000;MD10G1036600;MD11G1129400;MD15G1222200;MD11G1090700;MD09G1115200;MD03G1237900;MD00G1148700;MD05G1106400;MD17G1045900;MD10G1237900;MD07G1181300;MD07G1069200;MD05G1039800;MD03G1057900;MD02G1259800;MD10G1122900;MD01G1088600;MD10G1309300;MD09G1275600;MD02G1025400
573	MSTRG.29666.2	MD09G1115200
574	MSTRG.101001.1	MD09G1275600;MD02G1025400
575	MSTRG.104381.4	MD03G1116600;MD16G1235700
576	MSTRG.112692.1	MD13G1191600;MD15G1115100;MD02G1000200;MD15G1151900;MD11G1169100;MD05G1350000;MD04G1088000;MD10G1126700;MD02G1045600
577	MSTRG.29923.8	MD05G1116000;MD00G1179800;MD17G1182300;MD06G1153900;MD08G1111900
578	MSTRG.56716.17	MD17G1045900;MD10G1237900;MD07G1181300;MD05G1039800;MD03G1057900;MD02G1259800
579	MSTRG.66640.2	MD00G1113000;MD10G1200600
580	MSTRG.73889.4	MD01G1003000;MD05G1273200;MD10G1036600;MD11G1090700;MD03G1237900;MD10G1309300;MD02G1025400
581	MSTRG.56716.18	MD04G1171300;MD03G1186600;MD15G1392300;MD08G1179100;MD00G1093800;MD01G1088600;MD17G1045900;MD10G1237900;MD05G1039800;MD03G1057900;MD02G1259800;MD07G1181300;MD00G1157500
582	MSTRG.104381.51	MD03G1116600;MD16G1235700
583	MSTRG.39042.1	MD12G1137700
584	MSTRG.75752.4	MD15G1093000;MD09G1008200;MD00G1135700
585	MSTRG.138661.23	MD16G1282900
586	MSTRG.10024.2	MD01G1003000;MD05G1273200;MD10G1036600;MD11G1090700;MD03G1237900
587	MSTRG.56716.19	MD04G1171300;MD03G1186600;MD15G1392300;MD08G1179100;MD00G1093800;MD01G1088600;MD17G1045900;MD10G1237900;MD05G1039800;MD03G1057900;MD02G1259800;MD07G1181300;MD00G1157500
588	MSTRG.88766.8	MD15G1093000;MD00G1135700
589	MSTRG.128974.1	MD03G1269500;MD02G1045600;MD02G1174300;MD05G1191400;MD03G1109000
590	MSTRG.10722.2	MD16G1235700
591	MSTRG.106047.15	MD02G1155800
592	MSTRG.12037.3	MD09G1115200;MD07G1069200
593	MSTRG.109616.7	MD07G1042800
594	MSTRG.30924.6	MD01G1003000;MD05G1273200;MD15G1222200;MD10G1036600;MD05G1261200;MD08G1151600;MD11G1090700;MD03G1237900;MD10G1309300;MD07G1181300;MD02G1025400;MD00G1148700
595	MSTRG.8695.11	MD03G1116600
596	MSTRG.48742.2	MD08G1179100;MD09G1115200;MD00G1148700;MD01G1088600;MD05G1261200;MD01G1166600
597	MSTRG.4471.1	MD07G1291300;MD06G1080300
598	MSTRG.91673.2	MD16G1235700
599	MSTRG.34736.6	MD03G1116600
600	MSTRG.7830.5	MD10G1022300
601	MSTRG.8695.1	MD03G1116600
602	MSTRG.4780.4	MD01G1003000;MD05G1273200;MD10G1036600;MD08G1179100;MD15G1222200;MD11G1090700;MD09G1115200;MD01G1166600;MD00G1148700;MD07G1181300;MD03G1237900;MD02G1025400
603	MSTRG.41529.5	MD12G1137700
604	MSTRG.8645.1	MD00G1093800
605	MSTRG.41530.2	MD11G1025100
606	MSTRG.18642.7	MD13G1253200
607	MSTRG.41053.2	MD16G1235700
608	MSTRG.14427.1	MD13G1243100;MD11G1123800;MD14G1149400;MD05G1053500;MD04G1062300;MD01G1018500;MD11G1031900;MD10G1119200
609	MSTRG.1443.1	MD01G1088600;MD15G1371200;MD00G1093800;MD05G1039800;MD17G1191900;MD00G1157500
610	MSTRG.63087.2	MD15G1303300
611	MSTRG.15899.3	MD04G1171300;MD03G1186600;MD15G1445300
612	MSTRG.82468.1	MD07G1291300;MD06G1080300
613	MSTRG.121641.3	MD17G1108900
614	MSTRG.14972.44	MD16G1235700
615	MSTRG.914.1	MD09G1150500;MD09G1150600
616	MSTRG.2692.1	MD10G1261000;MD03G1031400;MD11G1055900;MD09G1074200;MD06G1051800;MD02G1080400;MD17G1273900;MD15G1195800;MD02G1062500;MD08G1107400;MD04G1244900
617	MSTRG.113013.1	MD15G1115100;MD10G1126700;MD15G1151900;MD02G1000200;MD04G1088000;MD02G1045600;MD16G1180400;MD14G1140200;MD05G1070000;MD15G1401500;MD17G1266900;MD03G1269500;MD12G1137700
618	MSTRG.69497.11	MD10G1036600;MD10G1309300
619	MSTRG.7095.1	MD16G1235700
620	MSTRG.138661.28	MD16G1282900
621	MSTRG.10722.32	MD03G1116600;MD16G1235700
622	MSTRG.20509.21	MD03G1116600
623	MSTRG.136058.1	MD12G1137700
624	MSTRG.66711.1	MD00G1145500
625	MSTRG.129022.1	MD15G1407700
626	MSTRG.122697.19	MD01G1166600;MD08G1151600;MD09G1115200
627	MSTRG.2677.3	MD00G1079700
628	MSTRG.66230.3	MD03G1116600;MD16G1235700
629	MSTRG.20063.2	MD16G1235700
630	MSTRG.59047.47	MD11G1055900
631	MSTRG.91673.3	MD03G1116600
632	MSTRG.33212.7	MD09G1150500;MD09G1150600;MD16G1235700
633	MSTRG.23445.3	MD03G1145800
634	MSTRG.10845.1	MD10G1134400
635	MSTRG.134795.2	MD14G1193500
636	MSTRG.59035.1	MD10G1207400;MD12G1033900
637	MSTRG.94880.2	MD11G1310600
638	MSTRG.4519.6	MD11G1119500
639	MSTRG.100194.5	MD06G1155700
640	MSTRG.44682.12	MD16G1235700
641	MSTRG.2308.1	MD01G1003000;MD05G1273200;MD10G1036600;MD15G1371200;MD15G1222200;MD00G1093800;MD09G1115200;MD05G1261200;MD01G1166600;MD00G1148700;MD08G1151600;MD08G1179100;MD11G1090700;MD01G1088600;MD10G1122900;MD03G1237900;MD10G1309300;MD09G1275600;MD02G1025400
642	MSTRG.4145.8	MD00G1093800;MD01G1088600;MD17G1045900;MD13G1285800;MD10G1237900;MD07G1146400;MD05G1039800;MD03G1057900;MD02G1259800
643	MSTRG.40511.1	MD03G1259800
644	MSTRG.65595.10	MD01G1003000;MD17G1041200;MD10G1155900;MD03G1044800;MD02G1049200;MD05G1273200;MD10G1036600;MD17G1045900;MD10G1237900;MD07G1069200;MD03G1057900;MD02G1259800;MD13G1285800;MD07G1146400;MD05G1261200;MD05G1039800;MD01G1166600;MD08G1151600;MD15G1445300;MD07G1181300;MD15G1222200;MD03G1237900;MD00G1148700;MD11G1090700;MD10G1309300;MD02G1025400
645	MSTRG.74671.1	MD10G1036600
646	MSTRG.42776.4	MD16G1235700
647	MSTRG.7662.4	MD02G1172400
648	MSTRG.77065.5	MD07G1069200;MD07G1181200;MD00G1157500;MD15G1445300
649	MSTRG.112941.1	MD02G1000200;MD16G1180400;MD12G1137700
650	MSTRG.40447.21	MD07G1004700
651	MSTRG.60228.1	MD07G1199200
652	MSTRG.94328.1	MD13G1116300;MD10G1122900;MD11G1090700;MD14G1086200
653	MSTRG.135190.12	MD01G1003000;MD05G1273200;MD07G1069200;MD15G1445300;MD07G1181300;MD10G1036600;MD05G1261200;MD08G1151600;MD15G1371200;MD11G1129400;MD11G1090700;MD03G1237900;MD00G1148700;MD02G1025400
654	MSTRG.129723.4	MD05G1273200;MD15G1222200;MD10G1036600;MD09G1115200;MD00G1148700;MD11G1090700;MD03G1237900;MD10G1309300;MD05G1106400;MD01G1088600;MD05G1261200;MD01G1166600;MD08G1151600;MD02G1025400
655	MSTRG.43328.1	MD06G1220400;MD09G1222400
656	MSTRG.128660.2	MD06G1106900
657	MSTRG.56587.4	MD16G1235700
658	MSTRG.37674.10	MD06G1155700
659	MSTRG.55835.4	MD10G1207400;MD01G1174700;MD12G1179300;MD02G1061800;MD15G1021400;MD15G1071900;MD12G1033900
660	MSTRG.35007.1	MD00G1135700
661	MSTRG.110503.1	MD11G1043700
662	MSTRG.56129.46	MD15G1122600
663	MSTRG.85850.1	MD05G1295300
664	MSTRG.49998.27	MD03G1116600
665	MSTRG.104711.3	MD16G1235700
666	MSTRG.473.3	MD16G1235700
667	MSTRG.144114.1	MD06G1080300;MD07G1291300
668	MSTRG.57550.6	MD01G1003000;MD05G1273200;MD17G1045900;MD13G1285800;MD10G1237900;MD07G1146400;MD03G1057900;MD02G1259800;MD10G1036600;MD07G1069200;MD05G1039800;MD00G1157500;MD15G1445300;MD07G1246800;MD08G1179100;MD15G1371200;MD05G1261200;MD01G1166600;MD08G1151600;MD09G1115200;MD03G1237900;MD01G1088600;MD11G1090700;MD10G1122900;MD10G1309300;MD02G1025400
669	MSTRG.5097.14	MD01G1003000;MD05G1273200;MD10G1036600;MD15G1222200;MD11G1090700;MD09G1115200;MD00G1148700;MD07G1069200;MD03G1237900
670	MSTRG.52934.4	MD11G1090700;MD08G1179100;MD05G1261200;MD01G1166600;MD08G1151600;MD00G1093800;MD09G1115200;MD01G1088600;MD05G1273200;MD13G1116300;MD07G1118300;MD10G1122900
671	MSTRG.58754.1	MD15G1001800
672	MSTRG.129868.1	MD12G1137700
673	MSTRG.14972.37	MD16G1235700
674	MSTRG.14972.42	MD16G1235700
675	MSTRG.40703.1	MD15G1222200;MD07G1069200;MD15G1445300;MD05G1273200;MD15G1371200;MD10G1036600;MD05G1261200;MD01G1166600;MD08G1151600;MD03G1237900;MD09G1115200;MD10G1309300;MD02G1025400
676	MSTRG.22598.1	MD03G1025200
677	MSTRG.44188.1	MD12G1033900;MD15G1071900;MD15G1021400
678	MSTRG.141761.1	MD03G1116600;MD16G1235700
679	MSTRG.137956.13	MD03G1116600;MD16G1235700
680	MSTRG.76051.5	MD06G1220400
681	MSTRG.129277.2	MD07G1160800
682	MSTRG.143136.1	MD04G1227200
683	MSTRG.123698.15	MD17G1041200;MD15G1210600;MD15G1210500;MD14G1233100;MD10G1155900;MD03G1044800;MD02G1049200;MD13G1259500;MD10G1009600;MD12G1175100;MD15G1177200;MD17G1045900;MD13G1285800;MD10G1237900;MD07G1146400;MD03G1057900;MD02G1259800;MD07G1069200;MD05G1039800;MD07G1181200;MD00G1157500;MD15G1445300;MD07G1246800;MD07G1181300;MD15G1371200;MD00G1093800;MD05G1261200;MD01G1166600;MD08G1151600;MD15G1222200;MD13G1114…
684	MSTRG.76949.2	MD06G1053200
685	MSTRG.6732.13	MD09G1150500;MD09G1150600
686	MSTRG.134321.3	MD09G1128000
687	MSTRG.142546.3	MD07G1199200
688	MSTRG.62565.4	MD10G1207400
689	MSTRG.42776.2	MD16G1235700
690	MSTRG.45773.82	MD04G1214200
691	MSTRG.37674.5	MD06G1155700
692	MSTRG.68856.1	MD12G1137700
693	MSTRG.50231.3	MD13G1116300;MD11G1294700;MD10G1122900
694	MSTRG.144873.16	MD01G1003000;MD05G1273200;MD10G1036600;MD11G1090700;MD03G1237900;MD10G1309300;MD02G1025400
695	MSTRG.94327.1	MD17G1045900;MD10G1237900;MD03G1057900;MD02G1259800;MD07G1069200;MD05G1039800;MD15G1445300;MD07G1181300;MD05G1261200;MD08G1151600;MD08G1179100;MD15G1222200;MD09G1115200;MD00G1148700;MD13G1116300;MD01G1088600;MD13G1114600;MD11G1090700;MD04G1171300;MD03G1186600;MD10G1122900
696	MSTRG.10722.10	MD16G1235700
697	MSTRG.22594.136	MD03G1059300
698	MSTRG.10722.1	MD16G1235700
699	MSTRG.10722.11	MD16G1235700
700	MSTRG.77383.1	MD03G1116600
701	MSTRG.69490.3	MD01G1003000;MD05G1273200;MD10G1036600;MD00G1148700;MD11G1090700;MD03G1237900;MD05G1261200;MD01G1166600;MD08G1151600;MD02G1025400
702	MSTRG.81271.3	MD10G1135200
703	MSTRG.41579.1	MD07G1213900;MD07G1241400;MD05G1012700;MD13G1221000
704	MSTRG.28180.1	MD05G1130900
705	MSTRG.81106.17	MD00G1135700
706	MSTRG.131332.1	MD16G1041500;MD13G1040500
707	MSTRG.91493.4	MD08G1179100;MD05G1039800
708	MSTRG.64559.1	MD16G1235700
709	MSTRG.60220.1	MD13G1075700;MD13G1100000
710	MSTRG.913.7	MD09G1150500;MD09G1150600
711	MSTRG.52672.6	MD09G1150500;MD09G1150600
712	MSTRG.7762.1	MD11G1055900;MD02G1260300
713	MSTRG.40447.22	MD07G1004700
714	MSTRG.112050.4	MD08G1179100;MD09G1115200
715	MSTRG.85749.3	MD11G1025100;MD04G1052900
716	MSTRG.32985.1	MD05G1232500
717	MSTRG.104381.48	MD03G1116600
718	MSTRG.55144.1	MD12G1128900
719	MSTRG.6343.2	MD05G1012700;MD03G1259800
720	MSTRG.45628.3	MD03G1145800
721	MSTRG.89856.11	MD08G1151600
722	MSTRG.40447.20	MD07G1004700
723	MSTRG.146176.2	MD06G1183900;MD15G1392300;MD10G1042900;MD13G1257300;MD02G1039100;MD01G1003000;MD15G1371200;MD03G1156700;MD00G1093800;MD17G1191900;MD03G1237900;MD09G1163200;MD17G1041200;MD15G1210600;MD15G1210500;MD15G1039800;MD14G1233100;MD13G1259500;MD10G1309300;MD10G1155900;MD10G1009600;MD09G1275600;MD03G1044800;MD02G1049200;MD02G1025400;MD12G1175100;MD15G1177200;MD05G1273200
724	MSTRG.14989.54	MD15G1093000;MD00G1135700
725	MSTRG.106997.2	MD05G1273200;MD01G1003000;MD10G1036600;MD11G1090700;MD03G1237900;MD09G1275600;MD10G1309300;MD10G1122900;MD02G1025400
726	MSTRG.15899.12	MD00G1093800;MD09G1115200;MD01G1088600
727	MSTRG.2308.2	MD01G1003000;MD05G1273200;MD15G1222200;MD15G1371200;MD10G1036600;MD09G1115200;MD05G1261200;MD08G1151600;MD11G1090700;MD01G1088600;MD03G1237900;MD10G1309300;MD02G1025400
728	MSTRG.68236.2	MD08G1139600
729	MSTRG.21705.8	MD03G1059300;MD00G1044400
730	MSTRG.129723.5	MD01G1003000;MD05G1273200;MD15G1222200;MD10G1036600;MD11G1090700;MD03G1237900;MD05G1261200;MD10G1309300;MD08G1151600;MD02G1025400
731	MSTRG.5097.17	MD11G1129400;MD09G1115200;MD07G1069200
732	MSTRG.27713.1	MD12G1137700
733	MSTRG.37674.9	MD06G1155700
734	MSTRG.99548.19	MD03G1116600
735	MSTRG.45628.4	MD03G1145800
736	MSTRG.86793.6	MD10G1309300
737	MSTRG.65032.5	MD11G1090700;MD00G1093800;MD15G1371200;MD17G1191900;MD01G1088600;MD05G1273200;MD05G1261200;MD13G1116300;MD08G1151600;MD15G1222200
738	MSTRG.104782.1	MD08G1129800
739	MSTRG.59035.2	MD10G1207400;MD12G1033900
740	MSTRG.43536.3	MD06G1002600
741	MSTRG.77065.3	MD07G1069200;MD07G1181200;MD00G1157500;MD15G1445300
742	MSTRG.137356.9	MD16G1235700
743	MSTRG.31231.1	MD16G1235700
744	MSTRG.4780.26	MD01G1003000;MD05G1273200;MD10G1036600;MD08G1179100;MD15G1222200;MD11G1090700;MD09G1115200;MD01G1166600;MD00G1148700;MD03G1237900;MD02G1025400
745	MSTRG.91493.5	MD08G1179100;MD05G1039800
746	MSTRG.15384.50	MD13G1086800
747	MSTRG.110225.1	MD06G1080300
748	MSTRG.9832.1	MD11G1055900
749	MSTRG.76524.28	MD05G1295300
750	MSTRG.91673.14	MD03G1116600
751	MSTRG.11513.1	MD11G1173700
752	MSTRG.40447.5	MD03G1030600;MD07G1004700
753	MSTRG.104381.22	MD03G1116600;MD16G1235700
754	MSTRG.97507.1	MD10G1012600;MD05G1146700
755	MSTRG.14972.50	MD03G1116600
756	MSTRG.65032.8	MD11G1090700;MD17G1191900;MD05G1273200;MD13G1116300
757	MSTRG.69497.12	MD05G1295300
758	MSTRG.69055.3	MD12G1137700
759	MSTRG.86995.3	MD16G1235700
760	MSTRG.75076.14	MD01G1003000;MD05G1273200;MD10G1036600;MD15G1222200;MD11G1090700;MD03G1237900;MD07G1118300;MD10G1122900;MD16G1023900;MD10G1309300;MD09G1275600;MD02G1025400
761	MSTRG.17016.8	MD09G1115200
762	MSTRG.18378.1	MD11G1090700;MD05G1273200;MD13G1116300;MD13G1100000;MD08G1151600
763	MSTRG.44022.1	MD09G1163200;MD15G1371200;MD08G1151600;MD15G1222200
764	MSTRG.81674.19	MD09G1283500
765	MSTRG.23787.1	MD16G1267500
766	MSTRG.7830.1	MD16G1140600;MD16G1235700
767	MSTRG.68313.3	MD10G1125100
768	MSTRG.56587.1	MD03G1116600
769	MSTRG.96104.1	MD00G1179700
770	MSTRG.97507.5	MD05G1146700;MD10G1012600;MD09G1141300
771	MSTRG.129479.2	MD16G1235700
772	MSTRG.40447.1	MD07G1004700
773	MSTRG.145858.2	MD04G1052900;MD11G1025100
774	MSTRG.1615.3	MD17G1045900;MD13G1285800;MD10G1237900;MD07G1146400;MD03G1057900;MD02G1259800;MD07G1069200;MD05G1039800;MD15G1445300;MD05G1261200;MD08G1151600;MD15G1371200;MD00G1093800
775	MSTRG.144873.21	MD01G1003000;MD05G1273200;MD07G1181300;MD15G1222200;MD10G1036600;MD11G1090700;MD05G1261200;MD01G1166600;MD08G1151600;MD16G1023900;MD09G1115200;MD03G1237900;MD00G1148700;MD05G1106400;MD01G1088600;MD10G1309300;MD02G1025400
776	MSTRG.65595.25	MD01G1003000;MD17G1041200;MD10G1155900;MD03G1044800;MD02G1049200;MD05G1273200;MD10G1036600;MD17G1045900;MD10G1237900;MD07G1069200;MD03G1057900;MD02G1259800;MD13G1285800;MD07G1146400;MD05G1261200;MD05G1039800;MD08G1151600;MD15G1445300;MD07G1181300;MD15G1222200;MD03G1237900;MD00G1148700;MD11G1090700;MD10G1309300;MD02G1025400
777	MSTRG.77041.4	MD17G1249000
778	MSTRG.913.18	MD09G1150500;MD09G1150600
779	MSTRG.43273.2	MD03G1285500
780	MSTRG.59915.1	MD07G1228800
781	MSTRG.5521.5	MD07G1069200;MD05G1261200;MD08G1151600
782	MSTRG.84454.32	MD17G1041200;MD10G1155900;MD03G1044800;MD02G1049200;MD01G1003000;MD05G1273200;MD15G1039800;MD15G1222200;MD00G1157500;MD15G1445300;MD11G1129400;MD05G1261200;MD01G1166600;MD15G1371200;MD00G1157700;MD00G1093800;MD08G1151600;MD10G1036600;MD11G1090700;MD03G1237900;MD09G1115200;MD05G1106400;MD00G1148700;MD09G1275600;MD04G1171300;MD03G1186600
783	MSTRG.56716.12	MD04G1171300;MD03G1186600;MD15G1392300;MD08G1179100;MD00G1093800;MD01G1088600;MD17G1045900;MD10G1237900;MD05G1039800;MD03G1057900;MD02G1259800;MD07G1181200;MD15G1445300;MD07G1181300;MD07G1069200;MD00G1157500;MD06G1053200;MD05G1261200;MD01G1166600
784	MSTRG.2492.2	MD07G1213900;MD05G1012700
785	MSTRG.22594.135	MD03G1059300
786	MSTRG.30924.7	MD01G1003000;MD05G1273200;MD15G1222200;MD10G1036600;MD05G1261200;MD01G1166600;MD08G1151600;MD11G1090700;MD03G1237900;MD10G1122900;MD10G1309300;MD02G1025400
787	MSTRG.104967.2	MD13G1191600;MD05G1350000;MD10G1126700
788	MSTRG.143893.2	MD07G1213900;MD05G1012700;MD07G1241400
789	MSTRG.20509.2	MD03G1116600;MD16G1235700
790	MSTRG.104381.39	MD03G1116600;MD16G1235700
791	MSTRG.16096.3	MD12G1137700
792	MSTRG.81868.1	MD03G1116600;MD04G1238600;MD07G1135100;MD16G1235700;MD06G1201500
793	MSTRG.63900.4	MD03G1116600
794	MSTRG.37793.1	MD13G1100000
795	MSTRG.116743.3	MD09G1150500
796	MSTRG.114295.1	MD11G1043700
797	MSTRG.15384.49	MD13G1086800
798	MSTRG.2828.1	MD05G1198100
799	MSTRG.96104.3	MD00G1179700
800	MSTRG.74192.6	MD00G1157500;MD07G1246800;MD15G1371200;MD00G1093800;MD08G1151600
801	MSTRG.85270.2	MD00G1179700
802	MSTRG.56508.1	MD11G1025100
803	MSTRG.106502.2	MD15G1371200;MD00G1157500;MD07G1181300;MD07G1246800
804	MSTRG.85787.2	MD15G1021400;MD15G1071900;MD12G1033900
805	MSTRG.30924.1	MD01G1003000;MD05G1273200;MD10G1036600;MD08G1179100;MD05G1261200;MD01G1166600;MD08G1151600;MD11G1090700;MD03G1237900;MD09G1115200;MD10G1309300;MD07G1069200;MD02G1025400;MD00G1148700
806	MSTRG.64559.13	MD16G1235700
807	MSTRG.22975.23	MD17G1045900;MD10G1237900;MD03G1057900;MD02G1259800;MD07G1069200;MD05G1039800;MD15G1445300;MD05G1261200;MD08G1151600;MD13G1114600;MD04G1171300;MD03G1186600
808	MSTRG.65032.6	MD11G1090700;MD15G1371200;MD00G1093800;MD01G1088600;MD17G1191900;MD05G1273200;MD05G1261200;MD13G1116300;MD08G1151600;MD15G1222200
809	MSTRG.63900.3	MD03G1116600
810	MSTRG.44610.25	MD16G1235700
811	MSTRG.30924.2	MD01G1003000;MD05G1273200;MD10G1036600;MD08G1179100;MD05G1261200;MD01G1166600;MD08G1151600;MD11G1090700;MD03G1237900;MD10G1122900;MD09G1115200;MD10G1309300;MD02G1025400;MD00G1148700
812	MSTRG.69055.5	MD12G1137700
813	MSTRG.97740.1	MD01G1003000;MD05G1273200;MD10G1036600;MD08G1179100;MD15G1222200;MD11G1090700;MD00G1148700;MD09G1115200;MD15G1445300;MD07G1069200;MD03G1237900;MD15G1210600;MD15G1210500;MD14G1233100;MD13G1285800;MD07G1146400
814	MSTRG.124892.1	MD09G1115200;MD00G1148700;MD01G1088600;MD15G1445300;MD07G1069200;MD01G1166600
815	MSTRG.65595.12	MD01G1003000;MD17G1041200;MD10G1155900;MD03G1044800;MD02G1049200;MD05G1273200;MD10G1036600;MD17G1045900;MD10G1237900;MD07G1069200;MD03G1057900;MD02G1259800;MD13G1285800;MD07G1146400;MD05G1261200;MD05G1039800;MD08G1151600;MD15G1445300;MD07G1181300;MD15G1222200;MD03G1237900;MD00G1148700;MD11G1090700;MD10G1309300;MD02G1025400
816	MSTRG.68357.5	MD13G1114600;MD00G1093800;MD09G1115200;MD01G1088600;MD17G1041200;MD15G1210600;MD15G1210500;MD15G1177200;MD14G1233100;MD13G1259500;MD12G1175100;MD10G1155900;MD10G1009600;MD03G1044800;MD02G1049200;MD05G1039800;MD00G1157500
817	MSTRG.22975.13	MD05G1273200;MD11G1090700
818	MSTRG.7161.1	MD17G1045900;MD13G1285800;MD10G1237900;MD07G1146400;MD03G1057900;MD02G1259800;MD07G1069200;MD05G1039800;MD15G1445300;MD08G1151600;MD09G1115200
819	MSTRG.41530.3	MD11G1025100
820	MSTRG.126971.1	MD15G1339000;MD11G1173700
821	MSTRG.73560.1	MD05G1155800
822	MSTRG.104651.1	MD12G1137700
823	MSTRG.14972.43	MD16G1235700
824	MSTRG.77041.1	MD17G1249000
825	MSTRG.74239.1	MD16G1235700
826	MSTRG.56241.5	MD16G1235700
827	MSTRG.78010.8	MD16G1235700
828	MSTRG.77041.7	MD17G1249000
829	MSTRG.15384.47	MD13G1086800
830	MSTRG.85484.25	MD08G1179100;MD09G1115200;MD05G1039800;MD08G1151600
831	MSTRG.37003.1	MD06G1080300;MD00G1073500;MD07G1291300;MD10G1203400;MD15G1206000
832	MSTRG.46305.1	MD07G1199200
833	MSTRG.11521.1	MD11G1055900
834	MSTRG.50231.1	MD13G1116300;MD11G1294700;MD10G1122900
835	MSTRG.913.8	MD09G1150500;MD09G1150600
836	MSTRG.77065.7	MD01G1088600
837	MSTRG.79022.2	MD02G1000200;MD02G1045600;MD15G1115100;MD15G1151900;MD16G1180400;MD04G1088000;MD10G1126700;MD14G1140200;MD15G1401500;MD11G1169100;MD03G1269500;MD17G1266900;MD12G1137700
838	MSTRG.22816.3	MD10G1207400;MD15G1021400
839	MSTRG.138276.11	MD07G1241400
840	MSTRG.37836.7	MD17G1276400
841	MSTRG.104419.1	MD14G1215400;MD11G1310600;MD00G1135700
842	MSTRG.76604.3	MD01G1003000;MD05G1273200;MD11G1090700;MD03G1237900;MD15G1222200;MD02G1025400
843	MSTRG.97507.3	MD10G1012600;MD05G1146700;MD16G1089200;MD13G1009700;MD05G1012700
844	MSTRG.20772.1	MD00G1187700
845	MSTRG.79939.6	MD01G1003000;MD05G1273200;MD10G1036600;MD15G1222200;MD11G1090700;MD03G1237900;MD07G1118300;MD08G1179100;MD02G1025400
846	MSTRG.59047.48	MD11G1055900
847	MSTRG.135190.14	MD01G1003000;MD05G1273200;MD07G1069200;MD15G1445300;MD07G1181300;MD15G1222200;MD05G1261200;MD10G1036600;MD08G1151600;MD15G1371200;MD00G1093800;MD11G1129400;MD11G1090700;MD03G1237900;MD05G1106400;MD00G1148700;MD10G1309300;MD02G1025400
848	MSTRG.65595.4	MD01G1003000;MD05G1273200;MD15G1222200;MD05G1261200;MD08G1151600;MD07G1181300;MD10G1036600;MD03G1237900;MD09G1115200;MD11G1090700;MD10G1309300;MD02G1025400
849	MSTRG.93906.1	MD10G1110100
850	MSTRG.32574.2	MD05G1248400;MD04G1052900
851	MSTRG.46305.3	MD07G1199200
852	MSTRG.91673.19	MD03G1116600
853	MSTRG.128660.6	MD06G1106900
854	MSTRG.91673.18	MD03G1116600
855	MSTRG.76051.8	MD06G1220400
856	MSTRG.86997.8	MD15G1222200;MD09G1115200;MD05G1261200;MD10G1309300;MD02G1025400;MD08G1151600
857	MSTRG.35007.5	MD00G1135700
858	MSTRG.7344.41	MD11G1055900
859	MSTRG.57978.2	MD02G1000200;MD02G1045600;MD05G1350000
860	MSTRG.98702.1	MD11G1090700;MD05G1273200;MD01G1003000
861	MSTRG.5902.3	MD00G1163500
862	MSTRG.91673.7	MD03G1116600
863	MSTRG.14972.70	MD16G1235700
864	MSTRG.71314.2	MD14G1193500
865	MSTRG.36730.1	MD15G1071900
866	MSTRG.79142.1	MD01G1151100;MD05G1248400
867	MSTRG.122697.18	MD08G1151600;MD09G1115200
868	MSTRG.2308.3	MD01G1003000;MD05G1273200;MD15G1222200;MD05G1261200;MD01G1166600;MD08G1151600;MD10G1036600;MD15G1392300;MD11G1090700;MD01G1088600;MD03G1237900;MD10G1309300;MD02G1025400
869	MSTRG.75076.13	MD01G1003000;MD05G1273200;MD10G1036600;MD17G1045900;MD13G1285800;MD10G1237900;MD07G1146400;MD03G1057900;MD02G1259800;MD07G1069200;MD05G1039800;MD00G1157500;MD07G1181300;MD15G1445300;MD15G1222200;MD15G1371200;MD00G1093800;MD05G1261200;MD08G1151600;MD11G1090700;MD11G1129400;MD03G1237900;MD07G1118300;MD10G1122900;MD16G1023900;MD10G1309300;MD09G1275600;MD02G1025400
870	MSTRG.144873.5	MD01G1003000;MD05G1273200;MD10G1036600;MD11G1090700;MD16G1023900;MD09G1115200;MD03G1237900;MD00G1148700;MD17G1045900;MD10G1237900;MD07G1181300;MD07G1069200;MD05G1039800;MD03G1057900;MD02G1259800;MD02G1025400
871	MSTRG.135190.35	MD17G1041200;MD15G1210600;MD15G1210500;MD14G1233100;MD10G1155900;MD03G1044800;MD02G1049200;MD15G1445300;MD15G1371200;MD08G1151600
872	MSTRG.69309.2	MD13G1112900
873	MSTRG.49998.24	MD03G1116600
874	MSTRG.12037.2	MD09G1115200;MD07G1069200
875	MSTRG.126971.4	MD15G1339000;MD11G1173700
876	MSTRG.10722.5	MD16G1235700
877	MSTRG.49998.13	MD03G1116600;MD16G1235700
878	MSTRG.122697.20	MD17G1041200;MD15G1210600;MD15G1210500;MD14G1233100;MD10G1155900;MD03G1044800;MD02G1049200;MD07G1069200;MD15G1445300;MD15G1371200;MD09G1115200
879	MSTRG.28579.1	MD07G1241400;MD03G1259800
880	MSTRG.65727.1	MD00G1135700;MD15G1093000;MD09G1008200
881	MSTRG.20981.1	MD10G1309300
882	MSTRG.34736.13	MD03G1116600
883	MSTRG.110423.15	MD03G1176100;MD10G1200600
884	MSTRG.133038.1	MD15G1371200;MD00G1093800
885	MSTRG.58721.5	MD16G1235700
886	MSTRG.15241.2	MD02G1064400;MD02G1064700
887	MSTRG.129460.12	MD01G1003000;MD17G1045900;MD10G1237900;MD07G1069200;MD03G1057900;MD02G1259800;MD12G1175100;MD10G1036600;MD15G1445300;MD05G1273200;MD15G1222200;MD05G1261200;MD01G1166600;MD08G1151600;MD08G1179100;MD15G1392300;MD09G1115200;MD03G1237900;MD01G1088600;MD10G1122900
888	MSTRG.57550.9	MD01G1003000;MD05G1273200;MD10G1036600;MD03G1237900;MD11G1090700;MD10G1309300;MD02G1025400
889	MSTRG.41353.2	MD12G1137700
890	MSTRG.59701.1	MD16G1235700
891	MSTRG.68357.4	MD06G1053200
892	MSTRG.97507.2	MD10G1012600;MD05G1146700
893	MSTRG.100260.1	MD17G1036500;MD07G1262000
894	MSTRG.77605.6	MD10G1114700
895	MSTRG.109421.2	MD01G1003000;MD05G1273200;MD07G1111700
896	MSTRG.2728.2	MD10G1126700;MD12G1137700
897	MSTRG.4780.2	MD01G1003000;MD05G1273200;MD17G1045900;MD13G1285800;MD10G1237900;MD07G1146400;MD03G1057900;MD02G1259800;MD07G1069200;MD05G1039800;MD07G1181200;MD00G1157500;MD15G1445300;MD15G1222200;MD07G1246800;MD15G1371200;MD10G1036600;MD05G1261200;MD08G1151600;MD11G1090700;MD09G1115200;MD00G1148700;MD05G1106400;MD03G1237900;MD04G1171300;MD03G1186600;MD01G1088600;MD10G1309300;MD02G1025400
898	MSTRG.42991.2	MD07G1199200
899	MSTRG.1443.2	MD01G1088600;MD15G1371200;MD00G1093800;MD05G1039800;MD17G1191900;MD00G1157500
900	MSTRG.82448.1	MD07G1246800;MD00G1157500
901	MSTRG.41835.1	MD01G1003000;MD05G1273200;MD10G1036600;MD11G1090700;MD03G1237900;MD02G1025400
902	MSTRG.79468.2	MD02G1273800
903	MSTRG.17712.1	MD11G1025100;MD04G1052900
904	MSTRG.141928.1	MD09G1141300
905	MSTRG.121825.2	MD02G1013500
906	MSTRG.7550.1	MD13G1114600;MD04G1171300;MD03G1186600;MD15G1371200;MD00G1093800;MD13G1259500;MD10G1009600;MD12G1175100;MD01G1088600
907	MSTRG.79939.2	MD05G1273200;MD15G1222200;MD10G1036600;MD11G1090700;MD03G1237900;MD05G1261200;MD10G1309300;MD02G1025400
908	MSTRG.129460.2	MD01G1003000;MD05G1273200;MD10G1036600;MD07G1069200;MD00G1157500;MD15G1222200;MD08G1179100;MD05G1261200;MD01G1166600;MD08G1151600;MD09G1115200;MD03G1237900;MD11G1090700
909	MSTRG.77694.2	MD13G1247900
910	MSTRG.14972.61	MD03G1116600
911	MSTRG.27344.2	MD05G1146700;MD13G1009700
912	MSTRG.29666.1	MD08G1179100;MD09G1115200;MD00G1148700;MD15G1445300;MD13G1116300;MD10G1122900;MD01G1088600;MD11G1090700
913	MSTRG.144385.3	MD08G1176800
914	MSTRG.131815.2	MD16G1235700
915	MSTRG.33326.1	MD00G1073500;MD07G1291300;MD06G1080300
916	MSTRG.15899.11	MD00G1093800;MD09G1115200;MD01G1088600
917	MSTRG.67612.1	MD05G1300500
918	MSTRG.1443.3	MD01G1088600;MD15G1371200;MD00G1093800;MD17G1191900
919	MSTRG.79939.10	MD01G1003000;MD05G1273200;MD15G1222200;MD10G1036600;MD11G1090700;MD03G1237900;MD07G1118300
920	MSTRG.56129.30	MD15G1122600
921	MSTRG.12725.1	MD17G1249000;MD02G1025400
922	MSTRG.3185.1	MD11G1090700;MD13G1116300;MD15G1371200;MD00G1093800;MD09G1115200
923	MSTRG.65032.9	MD11G1090700;MD15G1371200;MD00G1093800;MD01G1088600;MD17G1191900;MD05G1273200;MD05G1261200;MD13G1116300;MD08G1151600;MD15G1222200
924	MSTRG.913.1	MD09G1150500;MD09G1150600
925	MSTRG.913.4	MD09G1150500;MD09G1150600
926	MSTRG.81674.10	MD09G1283500
927	MSTRG.5521.7	MD07G1069200;MD05G1261200;MD08G1151600
928	MSTRG.140886.7	MD16G1235700
929	MSTRG.10722.4	MD16G1235700
930	MSTRG.4550.1	MD10G1309300;MD02G1025400;MD03G1237900;MD07G1111700
931	MSTRG.65492.3	MD08G1139600
932	MSTRG.18644.55	MD15G1093000;MD00G1135700
933	MSTRG.104381.29	MD03G1116600
934	MSTRG.8695.14	MD03G1116600
935	MSTRG.64559.8	MD16G1235700
936	MSTRG.58721.3	MD16G1235700
937	MSTRG.22594.200	MD03G1025200
938	MSTRG.133371.2	MD05G1273200;MD10G1036600;MD15G1222200;MD11G1090700;MD03G1237900;MD10G1309300;MD02G1025400
939	MSTRG.103458.1	MD13G1086800
940	MSTRG.54542.15	MD07G1042800
941	MSTRG.128025.4	MD11G1055900
942	MSTRG.65064.2	MD12G1137700
943	MSTRG.77683.10	MD13G1247900
944	MSTRG.142546.1	MD07G1199200
945	MSTRG.74192.3	MD00G1157500;MD07G1246800;MD15G1371200;MD00G1093800;MD08G1151600
946	MSTRG.104381.13	MD03G1116600;MD16G1235700
947	MSTRG.20557.1	MD12G1137700
948	MSTRG.110407.1	MD05G1012700;MD03G1259800
949	MSTRG.54274.1	MD11G1105800;MD03G1168500;MD11G1055900;MD04G1028400;MD02G1260300
950	MSTRG.102884.2	MD13G1116300
951	MSTRG.84712.1	MD01G1003000;MD10G1036600;MD05G1273200;MD15G1222200;MD08G1179100;MD11G1090700;MD03G1237900;MD10G1122900
952	MSTRG.23784.1	MD13G1191600;MD02G1000200;MD16G1180400;MD15G1151900;MD05G1070000;MD10G1126700;MD02G1045600;MD14G1140200;MD15G1401500;MD17G1266900;MD09G1005500;MD05G1350000;MD12G1137700;MD15G1395000
953	MSTRG.44682.6	MD16G1235700
954	MSTRG.755.14	MD00G1172200
955	MSTRG.20163.2	MD12G1137700
956	MSTRG.60219.1	MD13G1075700;MD13G1100000
957	MSTRG.86793.1	MD03G1116600
958	MSTRG.79939.5	MD01G1003000;MD05G1273200;MD10G1036600;MD15G1222200;MD11G1090700;MD03G1237900;MD02G1025400
959	MSTRG.29050.2	MD11G1025100
960	MSTRG.123698.14	MD17G1041200;MD15G1210600;MD15G1210500;MD14G1233100;MD10G1155900;MD03G1044800;MD02G1049200;MD13G1259500;MD10G1009600;MD12G1175100;MD15G1177200;MD17G1045900;MD13G1285800;MD10G1237900;MD07G1146400;MD03G1057900;MD02G1259800;MD07G1069200;MD05G1039800;MD07G1181200;MD00G1157500;MD15G1445300;MD07G1246800;MD07G1181300;MD15G1371200;MD00G1093800;MD05G1261200;MD01G1166600;MD08G1151600;MD15G1222200;MD13G1114…
961	MSTRG.71501.3	MD02G1208600
962	MSTRG.32472.1	MD05G1342100
963	MSTRG.55835.1	MD10G1207400;MD01G1174700;MD12G1179300;MD02G1061800;MD15G1021400;MD15G1071900;MD12G1033900
964	MSTRG.131815.1	MD03G1116600;MD16G1235700
965	MSTRG.90357.6	MD01G1003000;MD05G1273200;MD10G1036600;MD11G1090700;MD03G1237900;MD10G1309300;MD02G1025400
966	MSTRG.104381.16	MD03G1116600;MD16G1235700
967	MSTRG.43533.1	MD05G1350000
968	MSTRG.49998.9	MD03G1116600;MD16G1235700
969	MSTRG.34710.4	MD07G1111700
970	MSTRG.58501.2	MD01G1003000;MD05G1273200;MD10G1036600;MD15G1222200;MD08G1179100;MD11G1090700;MD03G1237900;MD10G1122900;MD01G1166600;MD07G1118300
971	MSTRG.62565.2	MD10G1207400
972	MSTRG.138884.2	MD09G1115200;MD00G1148700;MD01G1088600
973	MSTRG.83925.1	MD01G1003000;MD05G1273200;MD07G1069200;MD10G1036600;MD15G1445300;MD08G1179100;MD02G1039100;MD15G1222200;MD15G1371200;MD05G1261200;MD01G1166600;MD08G1151600;MD09G1115200;MD00G1148700;MD11G1090700;MD01G1088600;MD13G1114600;MD04G1171300;MD03G1237900;MD03G1186600;MD02G1025400
974	MSTRG.64507.1	MD15G1115100;MD02G1174300;MD02G1045600
975	MSTRG.15899.6	MD09G1115200;MD00G1093800;MD01G1088600;MD17G1045900;MD10G1237900;MD05G1039800;MD03G1057900;MD02G1259800;MD00G1157500;MD07G1181300
976	MSTRG.74994.2	MD07G1241400;MD15G1276600
977	MSTRG.82687.1	MD05G1248400;MD10G1087300;MD09G1070600;MD02G1217500;MD11G1031900;MD11G1102800
978	MSTRG.134795.1	MD14G1193500
979	MSTRG.112050.3	MD08G1179100;MD15G1445300;MD07G1069200;MD08G1151600;MD00G1157500;MD07G1246800;MD09G1115200
980	MSTRG.137956.19	MD03G1116600;MD16G1235700
981	MSTRG.92186.4	MD05G1025100
982	MSTRG.44610.59	MD03G1116600
983	MSTRG.133038.2	MD15G1371200;MD00G1093800
984	MSTRG.77683.17	MD11G1055900
985	MSTRG.83925.4	MD01G1003000;MD05G1273200;MD07G1069200;MD10G1036600;MD15G1445300;MD08G1179100;MD02G1039100;MD15G1222200;MD15G1371200;MD05G1261200;MD01G1166600;MD08G1151600;MD09G1115200;MD00G1148700;MD11G1090700;MD01G1088600;MD13G1114600;MD04G1171300;MD03G1237900;MD03G1186600;MD02G1025400
986	MSTRG.37965.16	MD00G1135700
987	MSTRG.98007.1	MD04G1052900;MD11G1025100
988	MSTRG.144385.10	MD08G1176800
989	MSTRG.79780.1	MD13G1075700;MD11G1090700
990	MSTRG.133317.1	MD16G1235700
991	MSTRG.22698.1	MD05G1328000
992	MSTRG.56716.13	MD04G1171300;MD03G1186600;MD15G1392300;MD08G1179100;MD00G1093800;MD01G1088600;MD17G1045900;MD10G1237900;MD05G1039800;MD03G1057900;MD02G1259800;MD07G1181300;MD00G1157500;MD06G1053200;MD05G1261200;MD01G1166600
993	MSTRG.15899.5	MD09G1115200;MD00G1148700;MD00G1093800;MD01G1088600
994	MSTRG.137801.5	MD15G1222200;MD05G1273200;MD10G1036600;MD10G1309300;MD03G1237900
995	MSTRG.103253.5	MD16G1235700
996	MSTRG.14972.45	MD16G1235700
997	MSTRG.140886.1	MD03G1116600;MD16G1235700
998	MSTRG.73889.5	MD07G1246800;MD00G1157500;MD10G1122900
999	MSTRG.144861.4	MD05G1012700
1000	MSTRG.48056.1	MD12G1137700
1001	MSTRG.144873.1	MD01G1003000;MD05G1273200;MD10G1036600;MD11G1129400;MD11G1090700;MD09G1115200;MD03G1237900;MD00G1148700;MD17G1045900;MD10G1237900;MD07G1069200;MD05G1039800;MD03G1057900;MD02G1259800;MD10G1309300;MD02G1025400
1002	MSTRG.85484.22	MD09G1115200;MD00G1148700;MD01G1088600
1003	MSTRG.109738.1	MD06G1126700
1004	MSTRG.144191.5	MD16G1247200
1005	MSTRG.64559.6	MD16G1235700
1006	MSTRG.55000.2	MD04G1088000;MD05G1350000;MD12G1137700
1007	MSTRG.135190.16	MD01G1003000;MD05G1273200;MD10G1036600;MD11G1090700;MD03G1237900;MD02G1025400
1008	MSTRG.41054.1	MD03G1116600
1009	MSTRG.103048.1	MD07G1109600;MD17G1147000;MD05G1352400;MD05G1230200;MD03G1159900;MD11G1171100;MD10G1261000;MD10G1103400;MD10G1021200;MD09G1074200;MD02G1315200;MD02G1273600;MD14G1214800;MD06G1119600;MD00G1080700;MD17G1273900;MD05G1075300;MD03G1018900;MD11G1055900;MD07G1003000;MD13G1247900;MD09G1261200;MD09G1149500;MD07G1080200;MD03G1198900;MD02G1260300;MD02G1062500;MD04G1147400;MD00G1172200;MD08G1107400;MD05G1019…
1010	MSTRG.103008.1	MD17G1142000
1011	MSTRG.146567.1	MD03G1116600
1012	MSTRG.5097.8	MD01G1003000;MD05G1273200;MD10G1036600;MD15G1222200;MD11G1090700;MD03G1237900
1013	MSTRG.75076.1	MD01G1003000;MD05G1273200;MD10G1036600;MD15G1222200;MD11G1090700;MD03G1237900;MD07G1118300;MD10G1122900;MD16G1023900;MD10G1309300;MD09G1275600;MD02G1025400
1014	MSTRG.102439.11	MD09G1115200;MD00G1148700;MD10G1042900;MD00G1093800
1015	MSTRG.41478.3	MD12G1137700
1016	MSTRG.92520.2	MD03G1285500
1017	MSTRG.83925.5	MD01G1003000;MD05G1273200;MD07G1069200;MD10G1036600;MD08G1179100;MD02G1039100;MD15G1222200;MD15G1371200;MD05G1261200;MD01G1166600;MD08G1151600;MD09G1115200;MD00G1148700;MD11G1090700;MD01G1088600;MD13G1114600;MD04G1171300;MD03G1237900;MD03G1186600;MD02G1025400
1018	MSTRG.109616.3	MD07G1042800
1019	MSTRG.38052.1	MD12G1137700
1020	MSTRG.114101.2	MD10G1174000
1021	MSTRG.41491.1	MD02G1110000;MD07G1245300;MD04G1062300
1022	MSTRG.14972.72	MD03G1116600
1023	MSTRG.109638.17	MD01G1003000;MD05G1273200;MD10G1036600;MD11G1090700;MD03G1237900
1024	MSTRG.102295.1	MD10G1134400
1025	MSTRG.4851.1	MD09G1257600
1026	MSTRG.87477.1	MD14G1215400
1027	MSTRG.133216.1	MD13G1075700
1028	MSTRG.7344.42	MD11G1055900
1029	MSTRG.83696.6	MD10G1221800
1030	MSTRG.33212.20	MD09G1150500;MD09G1150600
1031	MSTRG.129460.1	MD01G1003000;MD17G1041200;MD15G1210600;MD15G1210500;MD14G1233100;MD10G1155900;MD03G1044800;MD02G1049200;MD15G1039800;MD05G1273200;MD10G1036600;MD17G1045900;MD13G1285800;MD10G1237900;MD07G1146400;MD07G1069200;MD03G1057900;MD02G1259800;MD05G1039800;MD00G1157500;MD15G1445300;MD15G1222200;MD08G1179100;MD05G1261200;MD01G1166600;MD08G1151600;MD09G1115200;MD03G1237900;MD11G1090700
1032	MSTRG.26264.6	MD03G1259800
1033	MSTRG.4780.8	MD01G1003000;MD05G1273200;MD10G1036600;MD08G1179100;MD15G1222200;MD11G1090700;MD09G1115200;MD01G1166600;MD00G1148700;MD03G1237900;MD01G1088600;MD02G1025400
1034	MSTRG.94328.2	MD13G1116300;MD10G1122900;MD11G1090700;MD14G1086200
1035	MSTRG.67282.1	MD03G1145800
1036	MSTRG.99548.17	MD16G1235700
1037	MSTRG.72790.6	MD00G1135700
1038	MSTRG.24423.9	MD03G1097800;MD03G1103400
1039	MSTRG.7344.44	MD11G1055900
1040	MSTRG.140286.1	MD03G1116600
1041	MSTRG.46305.4	MD07G1199200
1042	MSTRG.64585.5	MD10G1126700;MD12G1137700
1043	MSTRG.91939.1	MD01G1151100;MD04G1052900
1044	MSTRG.913.24	MD09G1150500;MD09G1150600
1045	MSTRG.65595.24	MD05G1273200;MD10G1036600;MD15G1222200;MD03G1237900;MD11G1090700;MD02G1025400
1046	MSTRG.65032.10	MD11G1090700;MD15G1371200;MD00G1093800;MD01G1088600;MD17G1191900;MD05G1273200;MD05G1261200;MD13G1116300;MD08G1151600;MD15G1222200
1047	MSTRG.8127.2	MD01G1003000;MD05G1273200;MD15G1222200;MD10G1036600;MD11G1090700;MD09G1115200;MD03G1237900;MD00G1148700;MD05G1106400;MD01G1088600;MD02G1025400
1048	MSTRG.71977.1	MD07G1036500
1049	MSTRG.109616.5	MD11G1204100
1050	MSTRG.128660.4	MD06G1106900
1051	MSTRG.5097.2	MD01G1003000;MD05G1273200;MD10G1036600;MD15G1222200;MD11G1090700;MD09G1115200;MD00G1148700;MD07G1069200;MD03G1237900
1052	MSTRG.112049.1	MD11G1090700;MD03G1237900
1053	MSTRG.109638.20	MD08G1151600;MD09G1115200
1054	MSTRG.143314.19	MD15G1004700
1055	MSTRG.9910.2	MD12G1137700
1056	MSTRG.52809.1	MD16G1235700
1057	MSTRG.24100.1	MD02G1000200;MD04G1088000;MD10G1126700;MD12G1137700;MD01G1151100
1058	MSTRG.135190.15	MD01G1003000;MD05G1273200;MD07G1069200;MD15G1445300;MD07G1181300;MD15G1222200;MD05G1261200;MD10G1036600;MD08G1151600;MD15G1371200;MD00G1093800;MD11G1129400;MD11G1090700;MD03G1237900;MD05G1106400;MD00G1148700;MD10G1309300;MD02G1025400
1059	MSTRG.137956.21	MD03G1116600;MD16G1235700
1060	MSTRG.113118.1	MD16G1135400;MD11G1169100;MD15G1401500
1061	MSTRG.103065.1	MD04G1052900
1062	MSTRG.84454.13	MD01G1003000;MD05G1273200;MD15G1222200;MD17G1045900;MD10G1237900;MD07G1069200;MD03G1057900;MD02G1259800;MD05G1039800;MD00G1157500;MD15G1445300;MD07G1246800;MD07G1181300;MD05G1261200;MD01G1166600;MD15G1371200;MD00G1157700;MD00G1093800;MD08G1151600;MD10G1036600;MD11G1090700;MD03G1237900;MD09G1115200;MD05G1106400;MD00G1148700;MD09G1275600
1063	MSTRG.104381.40	MD03G1116600;MD16G1235700
1064	MSTRG.49998.42	MD03G1116600
1065	MSTRG.123698.13	MD17G1041200;MD15G1210600;MD15G1210500;MD14G1233100;MD10G1155900;MD03G1044800;MD02G1049200;MD13G1259500;MD10G1009600;MD12G1175100;MD15G1177200;MD17G1045900;MD13G1285800;MD10G1237900;MD07G1146400;MD03G1057900;MD02G1259800;MD07G1069200;MD05G1039800;MD07G1181200;MD00G1157500;MD15G1445300;MD07G1246800;MD07G1181300;MD15G1371200;MD00G1093800;MD05G1261200;MD01G1166600;MD08G1151600;MD15G1222200;MD13G1114…
1066	MSTRG.126319.3	MD01G1149400;MD07G1111700
1067	MSTRG.83427.5	MD05G1261200;MD08G1151600;MD09G1115200
1068	MSTRG.83925.9	MD07G1069200;MD15G1371200;MD05G1261200;MD08G1151600;MD15G1222200;MD09G1115200;MD01G1088600;MD13G1114600;MD04G1171300;MD03G1186600
1069	MSTRG.14286.1	MD15G1222200;MD05G1261200;MD01G1166600;MD08G1151600;MD10G1036600;MD09G1115200;MD10G1309300
1070	MSTRG.73889.8	MD07G1246800;MD00G1157500
1071	MSTRG.34736.18	MD03G1116600
1072	MSTRG.79939.11	MD01G1003000;MD05G1273200;MD10G1036600;MD11G1090700;MD09G1115200;MD03G1237900;MD10G1122900;MD01G1088600;MD07G1118300;MD05G1261200
1073	MSTRG.58721.4	MD16G1235700
1074	MSTRG.52276.1	MD01G1151100;MD11G1025100;MD04G1052900
1075	MSTRG.18134.5	MD03G1116600
1076	MSTRG.104711.1	MD16G1235700
1077	MSTRG.44373.13	MD05G1259800
1078	MSTRG.4780.20	MD01G1003000;MD05G1273200;MD10G1036600;MD08G1179100;MD15G1222200;MD11G1090700;MD09G1115200;MD01G1166600;MD00G1148700;MD07G1181300;MD03G1237900;MD02G1025400
1079	MSTRG.4780.22	MD01G1003000;MD05G1273200;MD17G1045900;MD13G1285800;MD10G1237900;MD07G1146400;MD03G1057900;MD02G1259800;MD07G1069200;MD05G1039800;MD10G1036600;MD00G1157500;MD15G1445300;MD07G1246800;MD08G1179100;MD05G1261200;MD01G1166600;MD08G1151600;MD11G1090700;MD09G1115200;MD00G1148700;MD03G1237900;MD12G1186900;MD10G1122900;MD04G1171300;MD03G1186600;MD01G1088600;MD10G1309300;MD02G1025400
1080	MSTRG.39792.1	MD12G1137700
1081	MSTRG.14972.59	MD16G1235700
1082	MSTRG.41256.1	MD14G1104800;MD05G1215500
1083	MSTRG.88267.1	MD01G1003000;MD05G1273200;MD07G1181200;MD07G1069200;MD05G1039800;MD15G1222200;MD15G1445300;MD05G1261200;MD01G1166600;MD08G1151600;MD07G1181300;MD10G1036600;MD11G1090700;MD03G1237900;MD09G1115200;MD00G1148700
1084	MSTRG.56716.24	MD04G1171300;MD03G1186600;MD15G1392300;MD00G1093800;MD01G1088600;MD00G1157500
1085	MSTRG.100260.2	MD17G1036500;MD07G1262000
1086	MSTRG.101298.2	MD16G1235700
1087	MSTRG.15899.8	MD08G1179100;MD00G1093800;MD09G1115200;MD01G1088600;MD17G1045900;MD10G1237900;MD05G1039800;MD03G1057900;MD02G1259800;MD00G1157500;MD07G1181300
1088	MSTRG.83884.3	MD01G1104100
1089	MSTRG.53920.2	MD05G1012700;MD03G1259800
1090	MSTRG.40447.17	MD03G1030600
1091	MSTRG.41053.1	MD16G1235700
1092	MSTRG.56129.41	MD15G1122600
1093	MSTRG.2596.1	MD12G1137700
1094	MSTRG.22816.11	MD10G1207400;MD15G1021400
1095	MSTRG.85270.1	MD00G1179700
1096	MSTRG.146176.3	MD06G1201500;MD15G1392300;MD10G1022300;MD13G1114600;MD04G1171300;MD03G1186600;MD10G1042900;MD13G1257300;MD01G1003000;MD15G1371200;MD00G1093800;MD02G1215500;MD17G1191900;MD03G1237900;MD07G1269500;MD09G1163200;MD17G1041200;MD15G1210600;MD15G1210500;MD15G1039800;MD14G1233100;MD13G1259500;MD10G1309300;MD10G1155900;MD10G1009600;MD09G1275600;MD03G1044800;MD02G1049200;MD02G1025400;MD12G1175100;MD15G1177…
1097	MSTRG.84471.1	MD07G1199200
1098	MSTRG.91493.3	MD08G1179100
1099	MSTRG.26593.2	MD00G1113000
1100	MSTRG.4780.3	MD01G1003000;MD05G1273200;MD10G1036600;MD08G1179100;MD15G1222200;MD11G1090700;MD09G1115200;MD01G1166600;MD00G1148700;MD07G1181300;MD03G1237900;MD02G1025400
1101	MSTRG.140886.17	MD16G1235700
1102	MSTRG.84298.5	MD02G1290500
1103	MSTRG.93418.2	MD04G1082700
1104	MSTRG.5097.9	MD01G1003000;MD05G1273200;MD10G1036600;MD15G1222200;MD11G1090700;MD09G1115200;MD15G1210600;MD15G1210500;MD14G1233100;MD13G1285800;MD07G1146400;MD00G1148700;MD17G1045900;MD17G1041200;MD15G1445300;MD10G1237900;MD10G1155900;MD07G1069200;MD05G1039800;MD03G1057900;MD03G1044800;MD02G1259800;MD02G1049200;MD03G1237900;MD01G1088600
1105	MSTRG.15657.1	MD03G1116600;MD16G1235700
1106	MSTRG.31231.3	MD16G1235700
1107	MSTRG.103253.6	MD16G1235700
1108	MSTRG.41634.1	MD13G1191600;MD16G1135400;MD15G1115100;MD17G1162900;MD14G1149400;MD13G1243100;MD11G1123800;MD11G1031900;MD10G1119200;MD04G1062300;MD02G1181400;MD01G1018500;MD10G1007000;MD02G1174300;MD12G1064800;MD13G1249000;MD10G1087300;MD07G1245300;MD12G1127400;MD17G1010800;MD17G1266900;MD11G1254200;MD10G1027800;MD05G1191400;MD05G1053500;MD02G1113700;MD09G1070600;MD14G1073400;MD11G1102800;MD15G1151900;MD15G1401…
1109	MSTRG.5097.5	MD01G1003000;MD05G1273200;MD15G1222200;MD10G1036600;MD11G1090700;MD09G1115200;MD15G1210600;MD15G1210500;MD14G1233100;MD13G1285800;MD07G1146400;MD00G1148700;MD17G1045900;MD17G1041200;MD15G1445300;MD10G1237900;MD10G1155900;MD07G1069200;MD05G1039800;MD03G1057900;MD03G1044800;MD02G1259800;MD02G1049200;MD03G1237900;MD01G1088600
1110	MSTRG.84454.21	MD01G1003000;MD05G1273200;MD10G1036600;MD11G1090700;MD03G1237900;MD10G1122900
1111	MSTRG.90826.11	MD17G1142000
1112	MSTRG.56111.1	MD07G1213900
1113	MSTRG.56716.14	MD04G1171300;MD03G1186600;MD15G1392300;MD08G1179100;MD00G1093800;MD01G1088600;MD17G1045900;MD10G1237900;MD05G1039800;MD03G1057900;MD02G1259800;MD07G1181300;MD00G1157500;MD05G1261200;MD01G1166600
1114	MSTRG.79468.4	MD02G1273800
1115	MSTRG.64080.2	MD12G1137700
1116	MSTRG.140886.26	MD16G1235700
1117	MSTRG.49998.2	MD03G1116600;MD16G1235700
1118	MSTRG.10722.8	MD16G1235700
1119	MSTRG.64223.2	MD02G1000200
1120	MSTRG.84421.1	MD05G1261200;MD01G1166600;MD09G1115200;MD11G1090700;MD08G1151600;MD13G1075700;MD15G1222200
1121	MSTRG.142546.2	MD07G1199200
1122	MSTRG.135671.1	MD08G1247000;MD09G1141300
1123	MSTRG.14972.51	MD03G1116600
1124	MSTRG.60832.1	MD05G1295300
1125	MSTRG.56132.1	MD00G1038200
1126	MSTRG.58857.18	MD15G1093000
1127	MSTRG.29923.16	MD05G1116000;MD00G1179800;MD06G1153900;MD17G1182300
1128	MSTRG.26593.1	MD00G1113000
1129	MSTRG.113683.2	MD00G1179700
1130	MSTRG.6343.3	MD05G1012700;MD03G1259800
1131	MSTRG.77605.4	MD02G1273800
1132	MSTRG.49998.31	MD03G1116600
1133	MSTRG.85659.1	MD10G1301200
1134	MSTRG.9660.2	MD00G1113000;MD10G1200600
1135	MSTRG.116895.2	MD07G1262000
1136	MSTRG.83925.3	MD01G1003000;MD05G1273200;MD10G1036600;MD15G1222200;MD11G1090700;MD03G1237900;MD02G1025400
1137	MSTRG.134795.3	MD14G1193500
1138	MSTRG.6500.1	MD00G1108500
1139	MSTRG.136256.1	MD16G1221900
1140	MSTRG.74192.4	MD07G1069200;MD00G1157500;MD07G1246800;MD15G1371200;MD00G1093800;MD08G1151600
1141	MSTRG.64769.1	MD01G1003000;MD05G1273200;MD10G1036600;MD15G1222200;MD11G1090700;MD03G1237900;MD10G1122900;MD10G1309300;MD02G1025400
1142	MSTRG.6732.6	MD09G1150500;MD09G1150600
1143	MSTRG.83925.10	MD07G1069200;MD05G1261200;MD08G1151600;MD15G1371200;MD13G1114600;MD04G1171300;MD03G1186600
1144	MSTRG.28195.3	MD16G1235700
1145	MSTRG.129460.3	MD01G1003000;MD17G1041200;MD15G1210600;MD15G1210500;MD14G1233100;MD10G1155900;MD03G1044800;MD02G1049200;MD15G1039800;MD05G1273200;MD10G1036600;MD17G1045900;MD13G1285800;MD10G1237900;MD07G1146400;MD07G1069200;MD03G1057900;MD02G1259800;MD05G1039800;MD00G1157500;MD15G1445300;MD15G1222200;MD08G1179100;MD05G1261200;MD01G1166600;MD08G1151600;MD09G1115200;MD03G1237900;MD11G1090700
1146	MSTRG.129462.1	MD05G1032300
1147	MSTRG.83469.1	MD12G1137700
1148	MSTRG.80984.1	MD10G1012600;MD05G1146700;MD03G1259800
1149	MSTRG.56716.21	MD04G1171300;MD03G1186600;MD15G1392300;MD00G1093800;MD08G1179100;MD01G1088600;MD17G1045900;MD10G1237900;MD05G1039800;MD03G1057900;MD02G1259800;MD07G1181200;MD15G1445300;MD07G1181300;MD07G1069200;MD00G1157500
1150	MSTRG.22816.15	MD10G1207400;MD15G1021400
1151	MSTRG.10722.22	MD16G1235700
1152	MSTRG.44610.30	MD16G1235700
1153	MSTRG.40447.19	MD03G1030600;MD07G1004700
1154	MSTRG.43328.2	MD06G1220400;MD09G1222400
1155	MSTRG.96269.1	MD13G1253200
1156	MSTRG.6001.2	MD11G1090700;MD05G1273200;MD09G1115200;MD09G1163200
1157	MSTRG.2401.2	MD17G1079600
1158	MSTRG.123083.9	MD03G1116600
1159	MSTRG.140886.33	MD03G1116600;MD16G1235700
1160	MSTRG.105243.1	MD00G1157500;MD07G1246800;MD15G1371200;MD00G1093800;MD15G1222200;MD08G1151600
1161	MSTRG.33212.21	MD09G1150500;MD09G1150600
1162	MSTRG.18378.6	MD11G1090700;MD08G1179100;MD05G1273200;MD13G1116300;MD05G1261200;MD01G1166600;MD13G1100000;MD09G1115200;MD08G1151600;MD00G1148700;MD10G1122900;MD01G1088600
1163	MSTRG.40500.1	MD07G1291300;MD06G1080300
1164	MSTRG.48799.2	MD06G1036000
1165	MSTRG.102539.1	MD10G1309300;MD09G1275600;MD02G1025400;MD05G1106400;MD03G1237900
1166	MSTRG.64585.4	MD12G1137700
1167	MSTRG.65595.11	MD01G1003000;MD05G1273200;MD15G1222200;MD05G1261200;MD08G1151600;MD07G1181300;MD10G1036600;MD03G1237900;MD09G1115200;MD11G1090700;MD10G1309300;MD02G1025400
1168	MSTRG.135190.29	MD01G1003000;MD05G1273200;MD10G1036600;MD11G1129400;MD11G1090700;MD03G1237900;MD15G1445300;MD00G1148700;MD02G1025400
1169	MSTRG.134000.2	MD16G1148700
1170	MSTRG.135190.19	MD01G1003000;MD05G1273200;MD10G1036600;MD11G1129400;MD11G1090700;MD03G1237900;MD15G1445300;MD00G1148700;MD02G1025400
1171	MSTRG.99548.1	MD03G1116600;MD16G1235700
1172	MSTRG.27007.6	MD11G1148600
1173	MSTRG.109638.24	MD08G1151600
1174	MSTRG.71930.2	MD09G1128000
1175	MSTRG.122697.22	MD15G1445300
1176	MSTRG.110850.1	MD00G1113000;MD10G1200600
1177	MSTRG.75076.5	MD01G1003000;MD05G1273200;MD15G1222200;MD10G1036600;MD11G1090700;MD03G1237900;MD16G1023900;MD10G1309300;MD02G1025400
1178	MSTRG.28195.8	MD16G1235700
1179	MSTRG.69490.2	MD01G1003000;MD05G1273200;MD10G1036600;MD11G1090700;MD03G1237900;MD05G1106400;MD10G1122900;MD10G1309300;MD09G1275600;MD02G1025400
1180	MSTRG.129723.10	MD07G1069200;MD15G1445300;MD15G1371200;MD08G1151600;MD13G1114600;MD04G1171300;MD03G1186600
1181	MSTRG.104381.36	MD03G1116600;MD16G1235700
1182	MSTRG.77605.9	MD10G1114700
1183	MSTRG.37965.28	MD07G1036500
1184	MSTRG.102439.10	MD08G1179100;MD00G1093800;MD01G1088600;MD17G1045900;MD10G1237900;MD07G1181300;MD05G1039800;MD03G1057900;MD02G1259800;MD05G1261200;MD01G1166600;MD08G1151600
1185	MSTRG.84454.4	MD01G1003000;MD05G1273200;MD15G1222200;MD17G1045900;MD10G1237900;MD07G1069200;MD03G1057900;MD02G1259800;MD05G1039800;MD05G1261200;MD01G1166600;MD15G1445300;MD08G1151600;MD07G1181300;MD15G1371200;MD00G1093800;MD10G1036600;MD11G1090700;MD03G1237900;MD09G1115200;MD05G1106400;MD00G1148700;MD09G1275600;MD02G1025400;MD01G1088600
1186	MSTRG.46384.3	MD17G1045900;MD13G1285800;MD10G1237900;MD07G1146400;MD03G1057900;MD02G1259800;MD07G1069200;MD05G1039800;MD15G1445300;MD05G1261200;MD08G1151600;MD04G1171300;MD03G1186600
1187	MSTRG.55835.6	MD10G1207400;MD01G1174700;MD12G1179300;MD02G1061800;MD15G1021400;MD15G1071900;MD12G1033900
1188	MSTRG.60221.1	MD13G1116300
1189	MSTRG.128436.2	MD10G1309300;MD16G1170800;MD13G1190500;MD02G1025400
1190	MSTRG.84454.31	MD01G1003000;MD05G1273200;MD15G1222200;MD05G1261200;MD01G1166600;MD08G1151600;MD07G1181300;MD15G1371200;MD00G1093800;MD10G1036600;MD11G1090700;MD03G1237900;MD09G1115200;MD05G1106400;MD00G1148700;MD09G1275600
1191	MSTRG.44926.4	MD01G1151100;MD11G1025100
1192	MSTRG.18378.5	MD11G1090700;MD08G1179100;MD05G1273200;MD13G1116300;MD05G1261200;MD01G1166600;MD09G1115200;MD08G1151600;MD00G1148700;MD10G1122900;MD01G1088600;MD13G1100000
1193	MSTRG.90959.8	MD03G1116600
1194	MSTRG.77683.9	MD13G1247900
1195	MSTRG.132216.1	MD01G1003000;MD13G1259500;MD10G1009600;MD12G1175100;MD05G1273200;MD07G1069200;MD10G1036600;MD08G1179100;MD02G1039100;MD15G1371200;MD00G1093800;MD08G1151600;MD15G1222200;MD09G1115200;MD03G1237900;MD11G1090700;MD00G1148700;MD10G1122900;MD01G1088600
1196	MSTRG.79939.3	MD01G1003000;MD05G1273200;MD15G1222200;MD10G1036600;MD11G1090700;MD17G1045900;MD15G1445300;MD10G1237900;MD07G1069200;MD05G1039800;MD03G1057900;MD02G1259800;MD03G1237900;MD05G1261200;MD10G1309300;MD02G1025400
1197	MSTRG.6590.1	MD00G1187400
1198	MSTRG.58501.1	MD01G1003000;MD05G1273200;MD11G1129400;MD10G1036600;MD08G1179100;MD15G1222200;MD09G1115200;MD11G1090700;MD15G1445300;MD03G1237900;MD01G1088600;MD05G1261200;MD01G1166600;MD10G1122900;MD08G1151600;MD07G1118300
1199	MSTRG.30065.1	MD16G1235700
1200	MSTRG.49998.11	MD03G1116600;MD16G1235700
1201	MSTRG.48869.1	MD15G1392300;MD13G1114600;MD04G1171300;MD03G1186600
1202	MSTRG.42591.1	MD04G1039700;MD04G1006800;MD04G1006600;MD00G1124700;MD00G1124500;MD00G1123900;MD00G1170700;MD10G1178200;MD05G1191500;MD05G1190900
1203	MSTRG.56716.20	MD04G1171300;MD03G1186600;MD15G1392300;MD08G1179100;MD00G1093800;MD01G1088600;MD17G1045900;MD10G1237900;MD05G1039800;MD03G1057900;MD02G1259800;MD07G1181300;MD00G1157500
1204	MSTRG.90617.1	MD03G1116600
1205	MSTRG.65256.1	MD17G1191900;MD01G1088600
1206	MSTRG.137845.3	MD17G1142000
1207	MSTRG.40742.1	MD11G1025100
1208	MSTRG.55148.29	MD16G1235700
1209	MSTRG.135190.34	MD15G1371200;MD08G1151600
1210	MSTRG.77605.8	MD10G1114700
1211	MSTRG.49998.6	MD03G1116600;MD16G1235700
1212	MSTRG.1063.7	MD03G1116600
1213	MSTRG.40511.2	MD03G1259800
1214	MSTRG.105242.2	MD01G1003000;MD05G1273200;MD10G1036600;MD08G1179100;MD15G1222200;MD09G1115200;MD00G1148700;MD11G1090700;MD03G1237900;MD05G1261200;MD10G1122900;MD02G1025400
1215	MSTRG.74716.1	MD09G1115200;MD05G1261200;MD08G1151600;MD00G1148700;MD01G1088600;MD15G1222200;MD15G1445300
1216	MSTRG.20063.1	MD16G1235700
1217	MSTRG.69055.1	MD12G1137700
1218	MSTRG.30924.9	MD08G1151600
