# Supplementary material for: Expression Profiles and Characteristics of Apple lncRNAs in Roots, Phloem, Leaves, Flowers, and Fruit
Source: Int J Mol Sci. 2022 May 25;23(11):5931. doi: 10.3390/ijms23115931 (PMC9180697; doi:10.3390/ijms23115931)
Supplement: Supplementary file 1 [file ijms-23-05931-s001.zip › Table S10.xlsx]

## Sheet: Table S10-1
Table S10-1 Prediction of lncRNA and miRNA interactions
No.	miRNA	LncRNA
1	mdm-miR10981c	MSTRG.43990.4
2	mdm-miR10981d	MSTRG.43990.4
3	mdm-miR10983	MSTRG.74301.14
4	mdm-miR10984a-3p	MSTRG.54754.2
5	mdm-miR10984a-5p	MSTRG.54754.2
6	mdm-miR10984b-5p	MSTRG.54754.2
7	mdm-miR10992	MSTRG.104221.3;MSTRG.104221.1;MSTRG.104221.2
8	mdm-miR10993a	MSTRG.102295.1
9	mdm-miR10993b	MSTRG.102295.1
10	mdm-miR10993c	MSTRG.138614.2;MSTRG.33331.7;MSTRG.4153.26;MSTRG.33331.6;MSTRG.45942.1;MSTRG.33331.8
11	mdm-miR10993d	MSTRG.4153.26;MSTRG.45942.1;MSTRG.33331.6;MSTRG.33331.8;MSTRG.138614.2;MSTRG.33331.7
12	mdm-miR10993e	MSTRG.45942.1;MSTRG.33331.6;MSTRG.33331.8;MSTRG.4153.26;MSTRG.33331.7;MSTRG.138614.2
13	mdm-miR10993f	MSTRG.33331.7;MSTRG.138614.2;MSTRG.33331.8;MSTRG.45942.1;MSTRG.33331.6;MSTRG.4153.26
14	mdm-miR10995	MSTRG.82464.1;MSTRG.122315.1;MSTRG.375.1;MSTRG.92647.1;MSTRG.52077.1;MSTRG.25599.2;MSTRG.80286.1;MSTRG.88802.1;MSTRG.25801.1;MSTRG.111591.2;MSTRG.28864.1;MSTRG.28856.1;MSTRG.88802.2
15	mdm-miR10996a	MSTRG.139603.2
16	mdm-miR10996b	MSTRG.139603.2
17	mdm-miR10999a	MSTRG.25588.3
18	mdm-miR10999b	MSTRG.25588.3
19	mdm-miR11000	MSTRG.48235.5
20	mdm-miR11002a	MSTRG.110261.6;MSTRG.143290.1;MSTRG.110261.3;MSTRG.143291.1
21	mdm-miR11002b	MSTRG.110261.3;MSTRG.143291.1;MSTRG.143290.1;MSTRG.110261.6
22	mdm-miR11002c-3p	MSTRG.110261.3;MSTRG.143290.1;MSTRG.143291.1;MSTRG.110261.6
23	mdm-miR11003	MSTRG.6395.1
24	mdm-miR11004	MSTRG.134000.2
25	mdm-miR11007	MSTRG.44682.2;MSTRG.44682.4;MSTRG.44682.7;MSTRG.44682.6;MSTRG.88008.1
26	mdm-miR11008	MSTRG.59035.3;MSTRG.59035.2;MSTRG.59035.1;MSTRG.84298.6;MSTRG.84298.10;MSTRG.143146.1;MSTRG.84298.8;MSTRG.139653.4
27	mdm-miR11011a	MSTRG.28245.2
28	mdm-miR11014	MSTRG.1347.1
29	mdm-miR11015	MSTRG.109203.2;MSTRG.137956.13;MSTRG.137956.16;MSTRG.135672.1;MSTRG.137956.3;MSTRG.137956.5;MSTRG.137956.14
30	mdm-miR11018	MSTRG.138935.1
31	mdm-miR156a	MSTRG.121641.34;MSTRG.121644.3;MSTRG.121641.36;MSTRG.17430.4;MSTRG.121641.35;MSTRG.55073.5;MSTRG.121641.32;MSTRG.63448.2;MSTRG.121641.29;MSTRG.121644.5;MSTRG.121641.37;MSTRG.121641.28;MSTRG.121641.3;MSTRG.121644.8;MSTRG.121641.31;MSTRG.121644.1
32	mdm-miR156aa	MSTRG.121641.29;MSTRG.121641.36;MSTRG.121641.34;MSTRG.17430.4;MSTRG.121641.35;MSTRG.121641.37;MSTRG.121641.28;MSTRG.121641.3;MSTRG.63448.2;MSTRG.121641.32;MSTRG.121641.31;MSTRG.121644.1
33	mdm-miR156ab	MSTRG.121641.32;MSTRG.121641.3;MSTRG.121641.31;MSTRG.121644.1;MSTRG.17430.4;MSTRG.121641.34;MSTRG.121641.29;MSTRG.121641.36;MSTRG.121641.37;MSTRG.121641.28;MSTRG.121641.35
34	mdm-miR156ac	MSTRG.121641.31;MSTRG.121644.1;MSTRG.121641.32;MSTRG.121641.3;MSTRG.121641.37;MSTRG.121641.28;MSTRG.121641.35;MSTRG.17430.4;MSTRG.121641.34;MSTRG.121641.29;MSTRG.121641.36
35	mdm-miR156ad	MSTRG.121644.8;MSTRG.121641.31;MSTRG.121644.1;MSTRG.63448.2;MSTRG.121641.32;MSTRG.72790.6;MSTRG.121641.3;MSTRG.121641.37;MSTRG.121641.28;MSTRG.121641.35;MSTRG.17430.4;MSTRG.121641.34;MSTRG.121641.36;MSTRG.121641.29
36	mdm-miR156ae	MSTRG.121641.28;MSTRG.121641.37;MSTRG.121641.35;MSTRG.17430.4;MSTRG.121641.36;MSTRG.121641.29;MSTRG.121641.34;MSTRG.121644.8;MSTRG.121641.31;MSTRG.121644.1;MSTRG.121641.32;MSTRG.63448.2;MSTRG.121641.3;MSTRG.72790.6
37	mdm-miR156b	MSTRG.121641.28;MSTRG.121641.37;MSTRG.121644.5;MSTRG.121641.29;MSTRG.121641.31;MSTRG.121644.8;MSTRG.121644.1;MSTRG.121641.3;MSTRG.121641.35;MSTRG.17430.4;MSTRG.121644.3;MSTRG.121641.34;MSTRG.121641.36;MSTRG.55073.5;MSTRG.121641.32;MSTRG.63448.2
38	mdm-miR156c	MSTRG.121644.8;MSTRG.121644.1;MSTRG.121641.31;MSTRG.121641.3;MSTRG.121641.28;MSTRG.121641.37;MSTRG.121641.29;MSTRG.121644.5;MSTRG.55073.5;MSTRG.121641.32;MSTRG.63448.2;MSTRG.121641.35;MSTRG.121644.3;MSTRG.121641.34;MSTRG.121641.36;MSTRG.17430.4
39	mdm-miR156d	MSTRG.17430.4;MSTRG.121641.36;MSTRG.121644.3;MSTRG.121641.34;MSTRG.121641.35;MSTRG.63448.2;MSTRG.121641.32;MSTRG.55073.5;MSTRG.121644.5;MSTRG.121641.29;MSTRG.121641.28;MSTRG.121641.37;MSTRG.121641.3;MSTRG.121644.8;MSTRG.121644.1;MSTRG.121641.31
40	mdm-miR156e	MSTRG.55073.5;MSTRG.63448.2;MSTRG.121641.32;MSTRG.121641.35;MSTRG.17430.4;MSTRG.121641.34;MSTRG.121644.3;MSTRG.121641.36;MSTRG.121644.8;MSTRG.121644.1;MSTRG.121641.31;MSTRG.121641.3;MSTRG.121641.37;MSTRG.121641.28;MSTRG.121644.5;MSTRG.121641.29
41	mdm-miR156f	MSTRG.121641.28;MSTRG.121641.37;MSTRG.121644.5;MSTRG.121641.29;MSTRG.121641.31;MSTRG.121644.8;MSTRG.121644.1;MSTRG.121641.3;MSTRG.121641.35;MSTRG.17430.4;MSTRG.121641.34;MSTRG.121644.3;MSTRG.121641.36;MSTRG.55073.5;MSTRG.121641.32;MSTRG.63448.2
42	mdm-miR156g	MSTRG.121641.34;MSTRG.121644.3;MSTRG.121641.36;MSTRG.17430.4;MSTRG.121641.35;MSTRG.55073.5;MSTRG.63448.2;MSTRG.121641.32;MSTRG.121641.29;MSTRG.121644.5;MSTRG.121641.37;MSTRG.121641.28;MSTRG.121641.3;MSTRG.121644.8;MSTRG.121641.31;MSTRG.121644.1
43	mdm-miR156h	MSTRG.63448.2;MSTRG.121641.32;MSTRG.55073.5;MSTRG.121641.36;MSTRG.121644.3;MSTRG.121641.34;MSTRG.17430.4;MSTRG.121641.35;MSTRG.121641.3;MSTRG.121641.31;MSTRG.121644.8;MSTRG.121644.1;MSTRG.121641.29;MSTRG.121644.5;MSTRG.121641.28;MSTRG.121641.37
44	mdm-miR156i	MSTRG.121641.32;MSTRG.63448.2;MSTRG.55073.5;MSTRG.17430.4;MSTRG.121641.36;MSTRG.121644.3;MSTRG.121641.34;MSTRG.121641.35;MSTRG.121641.3;MSTRG.121644.8;MSTRG.121641.31;MSTRG.121644.1;MSTRG.121644.5;MSTRG.121641.29;MSTRG.121641.37;MSTRG.121641.28
45	mdm-miR156j	MSTRG.55073.5;MSTRG.121641.32;MSTRG.63448.2;MSTRG.17430.4;MSTRG.121641.34;MSTRG.121644.3;MSTRG.121641.36;MSTRG.121641.35;MSTRG.121641.3;MSTRG.121644.1;MSTRG.121644.8;MSTRG.121641.31;MSTRG.121644.5;MSTRG.121641.29;MSTRG.121641.37;MSTRG.121641.28
46	mdm-miR156k	MSTRG.121641.36;MSTRG.121641.34;MSTRG.121644.3;MSTRG.17430.4;MSTRG.121641.35;MSTRG.63448.2;MSTRG.121641.32;MSTRG.55073.5;MSTRG.121641.29;MSTRG.121644.5;MSTRG.121641.37;MSTRG.121641.28;MSTRG.121641.3;MSTRG.121641.31;MSTRG.121644.8;MSTRG.121644.1
47	mdm-miR156l	MSTRG.121641.35;MSTRG.17430.4;MSTRG.121641.34;MSTRG.121644.3;MSTRG.121641.36;MSTRG.55073.5;MSTRG.63448.2;MSTRG.121641.32;MSTRG.121641.28;MSTRG.121641.37;MSTRG.121644.5;MSTRG.121641.29;MSTRG.121641.31;MSTRG.121644.8;MSTRG.121644.1;MSTRG.121641.3
48	mdm-miR156m	MSTRG.63448.2;MSTRG.121641.32;MSTRG.55073.5;MSTRG.17430.4;MSTRG.121641.36;MSTRG.121641.34;MSTRG.121644.3;MSTRG.121641.35;MSTRG.121641.3;MSTRG.121641.31;MSTRG.121644.8;MSTRG.121644.1;MSTRG.121644.5;MSTRG.121641.29;MSTRG.121641.28;MSTRG.121641.37
49	mdm-miR156n	MSTRG.17430.4;MSTRG.121644.3;MSTRG.121641.34;MSTRG.121641.36;MSTRG.121641.35;MSTRG.55073.5;MSTRG.63448.2;MSTRG.121641.32;MSTRG.121644.5;MSTRG.121641.29;MSTRG.121641.37;MSTRG.121641.28;MSTRG.121641.3;MSTRG.121641.31;MSTRG.121644.8;MSTRG.121644.1
50	mdm-miR156o	MSTRG.121641.35;MSTRG.17430.4;MSTRG.121641.34;MSTRG.121644.3;MSTRG.121641.36;MSTRG.55073.5;MSTRG.63448.2;MSTRG.121641.32;MSTRG.121641.37;MSTRG.121641.28;MSTRG.121644.5;MSTRG.121641.29;MSTRG.121644.8;MSTRG.121641.31;MSTRG.121644.1;MSTRG.121641.3
51	mdm-miR156t	MSTRG.121641.35;MSTRG.121641.37;MSTRG.121641.28;MSTRG.121641.34;MSTRG.121644.3;MSTRG.121641.36;MSTRG.121641.29;MSTRG.121644.5;MSTRG.17430.4;MSTRG.121644.8;MSTRG.121644.1;MSTRG.121641.31;MSTRG.121641.3;MSTRG.63448.2;MSTRG.121641.32
52	mdm-miR156u	MSTRG.121644.8;MSTRG.121644.1;MSTRG.121641.31;MSTRG.121641.3;MSTRG.63448.2;MSTRG.121641.32;MSTRG.121641.35;MSTRG.121641.37;MSTRG.121641.28;MSTRG.121641.34;MSTRG.121644.3;MSTRG.121641.36;MSTRG.121641.29;MSTRG.121644.5;MSTRG.17430.4
53	mdm-miR156v	MSTRG.121641.3;MSTRG.121641.32;MSTRG.63448.2;MSTRG.121644.8;MSTRG.121641.31;MSTRG.121644.1;MSTRG.121641.29;MSTRG.121641.36;MSTRG.121644.3;MSTRG.121641.34;MSTRG.17430.4;MSTRG.121644.5;MSTRG.121641.35;MSTRG.121641.37;MSTRG.121641.28
54	mdm-miR156w	MSTRG.121641.35;MSTRG.121641.28;MSTRG.121641.37;MSTRG.121641.34;MSTRG.121644.3;MSTRG.121641.36;MSTRG.121641.29;MSTRG.121644.5;MSTRG.17430.4;MSTRG.121641.31;MSTRG.121644.8;MSTRG.121644.1;MSTRG.121641.3;MSTRG.63448.2;MSTRG.121641.32
55	mdm-miR156x	MSTRG.63448.2;MSTRG.121641.32;MSTRG.121641.3;MSTRG.121644.1;MSTRG.121641.31;MSTRG.17430.4;MSTRG.121641.29;MSTRG.121641.36;MSTRG.121641.34;MSTRG.121641.28;MSTRG.121641.37;MSTRG.121641.35
56	mdm-miR156y	MSTRG.121641.3;MSTRG.121641.32;MSTRG.63448.2;MSTRG.121641.31;MSTRG.121644.1;MSTRG.121641.34;MSTRG.121641.36;MSTRG.121641.29;MSTRG.17430.4;MSTRG.121641.35;MSTRG.121641.28;MSTRG.121641.37
57	mdm-miR156z	MSTRG.121641.31;MSTRG.121644.1;MSTRG.63448.2;MSTRG.121641.32;MSTRG.121641.3;MSTRG.121641.28;MSTRG.121641.37;MSTRG.121641.35;MSTRG.17430.4;MSTRG.121641.34;MSTRG.121641.29;MSTRG.121641.36
58	mdm-miR159a	MSTRG.29411.6;MSTRG.9870.2;MSTRG.9870.3;MSTRG.9870.1
59	mdm-miR159b	MSTRG.9870.2;MSTRG.29411.6;MSTRG.9870.3;MSTRG.9870.1
60	mdm-miR159d	MSTRG.29411.6
61	mdm-miR159e	MSTRG.29411.6
62	mdm-miR159f	MSTRG.29411.6
63	mdm-miR160a	MSTRG.10845.1;MSTRG.10845.2
64	mdm-miR160b	MSTRG.10845.1;MSTRG.10845.2
65	mdm-miR160c	MSTRG.10845.2;MSTRG.10845.1
66	mdm-miR160d	MSTRG.10845.1;MSTRG.10845.2
67	mdm-miR160e	MSTRG.10845.2;MSTRG.10845.1
68	mdm-miR162a	MSTRG.52860.3;MSTRG.52860.2
69	mdm-miR162b	MSTRG.52860.3;MSTRG.52860.2
70	mdm-miR164a	MSTRG.35007.5;MSTRG.35007.2;MSTRG.35007.4;MSTRG.35007.6;MSTRG.35007.3;MSTRG.35007.1;MSTRG.142473.1
71	mdm-miR164b	MSTRG.142473.1;MSTRG.35007.1;MSTRG.35007.4;MSTRG.35007.3;MSTRG.35007.6;MSTRG.35007.2;MSTRG.35007.5
72	mdm-miR164c	MSTRG.35007.1;MSTRG.142473.1;MSTRG.35007.2;MSTRG.35007.5;MSTRG.35007.3;MSTRG.35007.4;MSTRG.35007.6
73	mdm-miR164d	MSTRG.35007.2;MSTRG.35007.5;MSTRG.35007.3;MSTRG.35007.4;MSTRG.35007.6;MSTRG.35007.1;MSTRG.142473.1
74	mdm-miR164e	MSTRG.35007.5;MSTRG.35007.2;MSTRG.35007.6;MSTRG.35007.4;MSTRG.35007.3;MSTRG.142473.1;MSTRG.35007.1
75	mdm-miR164f	MSTRG.35007.5;MSTRG.35007.2;MSTRG.35007.3;MSTRG.35007.4;MSTRG.35007.6;MSTRG.35007.1;MSTRG.142473.1
76	mdm-miR166a	MSTRG.57916.5;MSTRG.57916.3;MSTRG.50564.2;MSTRG.42932.1;MSTRG.57916.4;MSTRG.57916.2;MSTRG.42932.4
77	mdm-miR166b	MSTRG.57916.4;MSTRG.57916.2;MSTRG.42932.4;MSTRG.57916.5;MSTRG.57916.3;MSTRG.50564.2;MSTRG.42932.1
78	mdm-miR166c	MSTRG.42932.4;MSTRG.57916.2;MSTRG.57916.4;MSTRG.42932.1;MSTRG.50564.2;MSTRG.57916.5;MSTRG.57916.3
79	mdm-miR166d	MSTRG.57916.4;MSTRG.42932.4;MSTRG.57916.2;MSTRG.57916.3;MSTRG.57916.5;MSTRG.42932.1;MSTRG.50564.2
80	mdm-miR166e	MSTRG.57916.2;MSTRG.42932.4;MSTRG.57916.4;MSTRG.57916.3;MSTRG.57916.5;MSTRG.42932.1;MSTRG.50564.2
81	mdm-miR166f	MSTRG.57916.4;MSTRG.57916.2;MSTRG.42932.4;MSTRG.42932.1;MSTRG.50564.2;MSTRG.57916.5;MSTRG.57916.3
82	mdm-miR166g	MSTRG.57916.4;MSTRG.57916.2;MSTRG.42932.4;MSTRG.42932.1;MSTRG.50564.2;MSTRG.57916.5;MSTRG.57916.3
83	mdm-miR166h	MSTRG.57916.4;MSTRG.42932.4;MSTRG.57916.2;MSTRG.50564.2;MSTRG.42932.1;MSTRG.57916.5;MSTRG.57916.3
84	mdm-miR166i	MSTRG.42932.4;MSTRG.57916.2;MSTRG.57916.4;MSTRG.50564.2;MSTRG.42932.1;MSTRG.57916.3;MSTRG.57916.5
85	mdm-miR166j	MSTRG.50564.2;MSTRG.57916.3;MSTRG.42932.1;MSTRG.57916.4;MSTRG.42932.4;MSTRG.57916.5;MSTRG.57916.2
86	mdm-miR167b	MSTRG.101885.1;MSTRG.101885.2
87	mdm-miR167c	MSTRG.101885.2;MSTRG.101885.1
88	mdm-miR167d	MSTRG.101885.2;MSTRG.101885.1
89	mdm-miR167e	MSTRG.101885.2;MSTRG.101885.1
90	mdm-miR167f	MSTRG.101885.2;MSTRG.101885.1
91	mdm-miR167g	MSTRG.101885.1;MSTRG.101885.2
92	mdm-miR167h	MSTRG.101885.2;MSTRG.101885.1
93	mdm-miR167i	MSTRG.101885.1;MSTRG.101885.2
94	mdm-miR167j	MSTRG.101885.2;MSTRG.101885.1
95	mdm-miR171a	MSTRG.141153.2;MSTRG.71519.4;MSTRG.71519.1;MSTRG.141153.4;MSTRG.71519.3;MSTRG.141153.3
96	mdm-miR171b	MSTRG.141153.2;MSTRG.71519.4;MSTRG.71519.3;MSTRG.141153.4;MSTRG.71519.1;MSTRG.141153.3
97	mdm-miR171c	MSTRG.141153.3;MSTRG.71519.3;MSTRG.141153.4;MSTRG.71519.1;MSTRG.71519.4;MSTRG.141153.2;MSTRG.71501.3
98	mdm-miR171d	MSTRG.71519.1;MSTRG.141153.4;MSTRG.71519.3;MSTRG.141153.2;MSTRG.71519.4;MSTRG.71501.3;MSTRG.141153.3
99	mdm-miR171e	MSTRG.71519.1;MSTRG.141153.4;MSTRG.71519.3;MSTRG.71519.4;MSTRG.141153.2;MSTRG.71501.3;MSTRG.141153.3
100	mdm-miR171f-3p	MSTRG.71501.3
101	mdm-miR171f-5p	MSTRG.71501.3
102	mdm-miR171g	MSTRG.71519.1;MSTRG.141153.4;MSTRG.71519.3;MSTRG.141153.2;MSTRG.71519.4;MSTRG.71501.3;MSTRG.141153.3
103	mdm-miR171h	MSTRG.141153.3;MSTRG.141153.2;MSTRG.71501.3;MSTRG.71519.4;MSTRG.141153.4;MSTRG.71519.1;MSTRG.71519.3
104	mdm-miR171i	MSTRG.13519.1
105	mdm-miR171j	MSTRG.71501.3
106	mdm-miR171k	MSTRG.71501.3
107	mdm-miR171l	MSTRG.71501.3
108	mdm-miR171m	MSTRG.71501.3
109	mdm-miR171n	MSTRG.71501.3
110	mdm-miR171p	MSTRG.71519.3;MSTRG.71519.4;MSTRG.141153.2;MSTRG.71519.1;MSTRG.141153.3;MSTRG.141153.4
111	mdm-miR171q	MSTRG.71501.3
112	mdm-miR172a	MSTRG.24932.18;MSTRG.10690.6;MSTRG.10690.8;MSTRG.10690.5;MSTRG.24932.13;MSTRG.88649.5;MSTRG.88649.3;MSTRG.88649.4;MSTRG.58353.2;MSTRG.88649.7;MSTRG.88649.6;MSTRG.24932.20;MSTRG.28775.1;MSTRG.10690.2
113	mdm-miR172b	MSTRG.58353.2;MSTRG.88649.5;MSTRG.88649.3;MSTRG.88649.4;MSTRG.10690.2;MSTRG.88649.7;MSTRG.24932.20;MSTRG.88649.6;MSTRG.28775.1;MSTRG.24932.18;MSTRG.10690.8;MSTRG.10690.6;MSTRG.10690.5;MSTRG.24932.13
114	mdm-miR172c	MSTRG.10690.6;MSTRG.10690.8;MSTRG.10690.5;MSTRG.24932.18;MSTRG.24932.13;MSTRG.88649.5;MSTRG.88649.3;MSTRG.88649.4;MSTRG.58353.2;MSTRG.28775.1;MSTRG.88649.7;MSTRG.24932.20;MSTRG.88649.6;MSTRG.10690.2
115	mdm-miR172d	MSTRG.24932.13;MSTRG.10690.8;MSTRG.10690.6;MSTRG.10690.5;MSTRG.24932.18;MSTRG.28775.1;MSTRG.88649.7;MSTRG.24932.20;MSTRG.88649.6;MSTRG.10690.2;MSTRG.88649.5;MSTRG.88649.3;MSTRG.88649.4;MSTRG.58353.2
116	mdm-miR172e	MSTRG.10690.2;MSTRG.28775.1;MSTRG.88649.7;MSTRG.24932.20;MSTRG.88649.6;MSTRG.58353.2;MSTRG.88649.5;MSTRG.88649.4;MSTRG.88649.3;MSTRG.24932.13;MSTRG.10690.6;MSTRG.10690.5;MSTRG.10690.8;MSTRG.24932.18
117	mdm-miR172f	MSTRG.24932.20;MSTRG.88649.7;MSTRG.88649.6;MSTRG.28775.1;MSTRG.10690.2;MSTRG.88649.4;MSTRG.88649.5;MSTRG.88649.3;MSTRG.58353.2;MSTRG.24932.13;MSTRG.24932.18;MSTRG.10690.6;MSTRG.10690.8;MSTRG.10690.5
118	mdm-miR172g	MSTRG.24932.13;MSTRG.10690.8;MSTRG.10690.5;MSTRG.10690.6;MSTRG.24932.18;MSTRG.10690.2;MSTRG.28775.1;MSTRG.88649.7;MSTRG.88649.6;MSTRG.24932.20;MSTRG.58353.2;MSTRG.88649.5;MSTRG.88649.4;MSTRG.88649.3
119	mdm-miR172h	MSTRG.24932.18;MSTRG.10690.6;MSTRG.10690.5;MSTRG.10690.8;MSTRG.24932.13;MSTRG.88649.4;MSTRG.88649.5;MSTRG.88649.3;MSTRG.58353.2;MSTRG.88649.7;MSTRG.24932.20;MSTRG.88649.6;MSTRG.28775.1;MSTRG.10690.2
120	mdm-miR172i	MSTRG.88649.5;MSTRG.88649.4;MSTRG.88649.3;MSTRG.58353.2;MSTRG.24932.20;MSTRG.88649.7;MSTRG.88649.6;MSTRG.10690.2;MSTRG.10690.6;MSTRG.10690.5;MSTRG.10690.8;MSTRG.24932.18;MSTRG.24932.13
121	mdm-miR172j	MSTRG.10690.6;MSTRG.10690.5;MSTRG.10690.8;MSTRG.24932.18;MSTRG.24932.13;MSTRG.58353.2;MSTRG.88649.4;MSTRG.88649.5;MSTRG.88649.3;MSTRG.10690.2;MSTRG.24932.20;MSTRG.88649.6;MSTRG.88649.7
122	mdm-miR172k	MSTRG.88649.6;MSTRG.24932.20;MSTRG.88649.7;MSTRG.10690.2;MSTRG.88649.4;MSTRG.88649.5;MSTRG.88649.3;MSTRG.58353.2;MSTRG.24932.13;MSTRG.24932.18;MSTRG.10690.6;MSTRG.10690.5;MSTRG.10690.8
123	mdm-miR172l	MSTRG.24932.13;MSTRG.24932.18;MSTRG.10690.5;MSTRG.10690.8;MSTRG.10690.6;MSTRG.88649.7;MSTRG.24932.20;MSTRG.88649.6;MSTRG.10690.2;MSTRG.88649.5;MSTRG.88649.3;MSTRG.88649.4;MSTRG.58353.2
124	mdm-miR172m	MSTRG.24932.18;MSTRG.10690.6;MSTRG.10690.8;MSTRG.10690.5;MSTRG.24932.13;MSTRG.58353.2;MSTRG.88649.4;MSTRG.88649.5;MSTRG.88649.3;MSTRG.10690.2;MSTRG.88649.7;MSTRG.88649.6;MSTRG.24932.20
125	mdm-miR172n	MSTRG.58353.2;MSTRG.88649.3;MSTRG.88649.5;MSTRG.88649.4;MSTRG.10690.2;MSTRG.88649.7;MSTRG.88649.6;MSTRG.24932.20;MSTRG.24932.18;MSTRG.10690.8;MSTRG.10690.6;MSTRG.10690.5;MSTRG.24932.13
126	mdm-miR172o	MSTRG.88649.4;MSTRG.88649.5;MSTRG.88649.3;MSTRG.58353.2;MSTRG.88649.6;MSTRG.88649.7;MSTRG.24932.20;MSTRG.10690.2;MSTRG.24932.18;MSTRG.10690.8;MSTRG.10690.6;MSTRG.10690.5;MSTRG.24932.13
127	mdm-miR172p	MSTRG.88649.6;MSTRG.58353.2;MSTRG.10690.8;MSTRG.88649.5;MSTRG.28775.1;MSTRG.10690.6;MSTRG.24932.18;MSTRG.24932.13;MSTRG.24932.20;MSTRG.88649.4;MSTRG.10690.2;MSTRG.10690.5;MSTRG.88649.7;MSTRG.88649.3
128	mdm-miR2118a	MSTRG.94895.2
129	mdm-miR2118b	MSTRG.94895.2
130	mdm-miR2118c	MSTRG.94895.2
131	mdm-miR3627a	MSTRG.139861.1;MSTRG.139860.2
132	mdm-miR3627b	MSTRG.139861.1;MSTRG.139860.2
133	mdm-miR3627c	MSTRG.139861.1;MSTRG.139860.2
134	mdm-miR393a	MSTRG.60895.2;MSTRG.12957.1
135	mdm-miR393b	MSTRG.60895.2;MSTRG.12957.1
136	mdm-miR393c	MSTRG.12957.1;MSTRG.60895.2
137	mdm-miR393d	MSTRG.60895.2;MSTRG.12957.1
138	mdm-miR393e	MSTRG.12957.1;MSTRG.60895.2
139	mdm-miR393f	MSTRG.12957.1;MSTRG.60895.2
140	mdm-miR395a	MSTRG.104245.2;MSTRG.104248.2;MSTRG.132201.2;MSTRG.132201.1;MSTRG.104248.1;MSTRG.132201.3
141	mdm-miR395b	MSTRG.104245.2;MSTRG.104248.2;MSTRG.132201.2;MSTRG.104248.1;MSTRG.132201.3;MSTRG.132201.1
142	mdm-miR395c	MSTRG.104248.2;MSTRG.104245.2;MSTRG.132201.1;MSTRG.132201.3;MSTRG.104248.1;MSTRG.132201.2
143	mdm-miR395d-3p	MSTRG.132201.1;MSTRG.104248.1;MSTRG.132201.3;MSTRG.132201.2;MSTRG.104248.2;MSTRG.104245.2
144	mdm-miR395d-5p	MSTRG.104248.2;MSTRG.132205.1;MSTRG.104248.1
145	mdm-miR395e	MSTRG.132201.1;MSTRG.104248.1;MSTRG.132201.3;MSTRG.132201.2;MSTRG.104248.2;MSTRG.104245.2
146	mdm-miR395f	MSTRG.104248.2;MSTRG.104245.2;MSTRG.132201.3;MSTRG.104248.1;MSTRG.132201.1;MSTRG.132201.2
147	mdm-miR395g-3p	MSTRG.132201.2;MSTRG.104248.1;MSTRG.132201.3;MSTRG.132201.1;MSTRG.104245.2;MSTRG.104248.2
148	mdm-miR395g-5p	MSTRG.104248.2;MSTRG.132205.1;MSTRG.104248.1
149	mdm-miR395h	MSTRG.132201.2;MSTRG.104248.1;MSTRG.132201.3;MSTRG.132201.1;MSTRG.104245.2;MSTRG.104248.2
150	mdm-miR395i-3p	MSTRG.104245.2;MSTRG.104248.2;MSTRG.132201.2;MSTRG.104248.1;MSTRG.132201.3;MSTRG.132201.1
151	mdm-miR395i-5p	MSTRG.104248.1;MSTRG.132205.1;MSTRG.104248.2
152	mdm-miR395j	MSTRG.104248.2;MSTRG.132205.1;MSTRG.104248.1
153	mdm-miR395k	MSTRG.146176.2;MSTRG.132201.2;MSTRG.3953.6;MSTRG.132201.1;MSTRG.3953.4;MSTRG.3953.2;MSTRG.3953.5;MSTRG.104248.1;MSTRG.104245.2;MSTRG.104248.2;MSTRG.132201.3
154	mdm-miR395l	MSTRG.104245.2;MSTRG.104248.2;MSTRG.132201.3;MSTRG.104248.1;MSTRG.132201.2;MSTRG.132201.1
155	mdm-miR396c	MSTRG.89841.2;MSTRG.89841.1
156	mdm-miR396d	MSTRG.89841.2;MSTRG.89841.1
157	mdm-miR396e	MSTRG.89841.2;MSTRG.89841.1
158	mdm-miR398a	MSTRG.26516.2;MSTRG.26510.75;MSTRG.26516.3
159	mdm-miR398b	MSTRG.26516.2;MSTRG.26510.75;MSTRG.26516.3
160	mdm-miR398c	MSTRG.26516.2;MSTRG.26510.75;MSTRG.26516.3
161	mdm-miR477a	MSTRG.114787.1
162	mdm-miR482a-3p	MSTRG.76051.5;MSTRG.76051.8;MSTRG.76051.6
163	mdm-miR482a-5p	MSTRG.76051.5;MSTRG.76051.8;MSTRG.76051.6
164	mdm-miR482b	MSTRG.60842.1;MSTRG.103191.5;MSTRG.60842.2;MSTRG.103191.2;MSTRG.103191.4;MSTRG.103191.1;MSTRG.103191.3
165	mdm-miR482c	MSTRG.103191.3;MSTRG.103191.4;MSTRG.103191.1;MSTRG.60842.2;MSTRG.103191.2;MSTRG.103191.5;MSTRG.60842.1
166	mdm-miR482d	MSTRG.103191.2;MSTRG.60842.2;MSTRG.103191.3;MSTRG.103191.1;MSTRG.103191.4;MSTRG.103191.5;MSTRG.60842.1
167	mdm-miR5225a	MSTRG.139861.2;MSTRG.139857.2;MSTRG.139861.1
168	mdm-miR5225b	MSTRG.139857.2;MSTRG.139861.1;MSTRG.139861.2
169	mdm-miR5225c	MSTRG.139861.2;MSTRG.69942.2;MSTRG.139861.1
170	mdm-miR535a	MSTRG.41686.13;MSTRG.41686.19;MSTRG.41686.18;MSTRG.81674.11;MSTRG.41686.17
171	mdm-miR535b	MSTRG.41686.17;MSTRG.41686.13;MSTRG.41686.18;MSTRG.41686.19
172	mdm-miR535c	MSTRG.41686.17;MSTRG.41686.13;MSTRG.41686.18;MSTRG.41686.19
173	mdm-miR535d	MSTRG.41686.19;MSTRG.81674.11;MSTRG.41686.18;MSTRG.41686.13;MSTRG.41686.17
174	mdm-miR7121a	MSTRG.14423.1;MSTRG.14422.1
175	mdm-miR7121b	MSTRG.14422.1;MSTRG.14423.1
176	mdm-miR7121c	MSTRG.14423.1;MSTRG.14422.1
177	mdm-miR7121d	MSTRG.14422.1;MSTRG.14423.1
178	mdm-miR7121e	MSTRG.14422.1;MSTRG.14423.1
179	mdm-miR7121f	MSTRG.14422.1;MSTRG.14423.1
180	mdm-miR7121g	MSTRG.14422.1;MSTRG.14423.1
181	mdm-miR7121h	MSTRG.14422.1;MSTRG.14423.1
182	mdm-miR7126-3p	MSTRG.11457.2
183	mdm-miR7126-5p	MSTRG.11457.2
184	mdm-miR827	MSTRG.2929.2
185	mdm-miR828a	MSTRG.82843.2;MSTRG.131436.2
186	mdm-miR828b	MSTRG.131436.2;MSTRG.82843.2
187	mdm-miR858	MSTRG.102984.5;MSTRG.102984.4;MSTRG.102984.1;MSTRG.131008.8;MSTRG.53395.2;MSTRG.53395.3

## Sheet: Table S10-2
Table S10-2 Details of lncRNA and miRNA interacations
No.	Sequence pairs of lncRNAs and miRNAs	LncRNA_ID and location	Score	Range
1	>mdm-miR482a-3p	MSTRG.76051.6 Chr09 32954444-32962720	score:0	range:299-320
	miRNA 3' AUCCUUACCCGCCCGAACCCUU 5'
	||||||||||||||||||||||
	target 5' UAGGAAUGGGCGGGCUUGGGAA 3'
2	>mdm-miR482a-3p	MSTRG.76051.8 Chr09 32954594-32962700	score:0	range:149-170
	miRNA 3' AUCCUUACCCGCCCGAACCCUU 5'
	||||||||||||||||||||||
	target 5' UAGGAAUGGGCGGGCUUGGGAA 3'
3	>mdm-miR482a-3p	MSTRG.76051.5 Chr09 32954444-32962720	score:0	range:299-320
	miRNA 3' AUCCUUACCCGCCCGAACCCUU 5'
	||||||||||||||||||||||
	target 5' UAGGAAUGGGCGGGCUUGGGAA 3'
4	>mdm-miR482a-5p	MSTRG.76051.6 Chr09 32954444-32962720	score:0	range:241-262
	miRNA 3' AGAAGGGUUUGUCGGGUAAGGA 5'
	||||||||||||||||||||||
	target 5' UCUUCCCAAACAGCCCAUUCCU 3'
5	>mdm-miR482a-5p	MSTRG.76051.8 Chr09 32954594-32962700	score:0	range:91-112
	miRNA 3' AGAAGGGUUUGUCGGGUAAGGA 5'
	||||||||||||||||||||||
	target 5' UCUUCCCAAACAGCCCAUUCCU 3'
6	>mdm-miR482a-5p	MSTRG.76051.5 Chr09 32954444-32962720	score:0	range:241-262
	miRNA 3' AGAAGGGUUUGUCGGGUAAGGA 5'
	||||||||||||||||||||||
	target 5' UCUUCCCAAACAGCCCAUUCCU 3'
7	>mdm-miR156aa	MSTRG.17430.4 Chr02 13244956-13245809	score:3	range:109-128
	miRNA 3' CACGAGAGAUAGAAGACAGU 5'
	|||||| || ||||||||||
	target 5' GUGCUCACUCUCUUCUGUCA 3'
8	>mdm-miR156aa	MSTRG.121641.37 Chr15 11421520-11433603	score:3	range:1101-1120
	miRNA 3' CACGAGAGAUAGAAGACAGU 5'
	|||||| || ||||||||||
	target 5' GUGCUCACUCUCUUCUGUCA 3'
9	>mdm-miR156aa	MSTRG.121641.36 Chr15 11421495-11433601	score:3	range:1129-1148
	miRNA 3' CACGAGAGAUAGAAGACAGU 5'
	|||||| || ||||||||||
	target 5' GUGCUCACUCUCUUCUGUCA 3'
10	>mdm-miR156aa	MSTRG.121641.35 Chr15 11421468-11433593	score:3	range:1385-1404
	miRNA 3' CACGAGAGAUAGAAGACAGU 5'
	|||||| || ||||||||||
	target 5' GUGCUCACUCUCUUCUGUCA 3'
11	>mdm-miR156aa	MSTRG.121641.29 Chr15 11421328-11433637	score:3	range:1522-1541
	miRNA 3' CACGAGAGAUAGAAGACAGU 5'
	|||||| || ||||||||||
	target 5' GUGCUCACUCUCUUCUGUCA 3'
12	>mdm-miR156aa	MSTRG.121641.34 Chr15 11421468-11433593	score:3	range:1862-1881
	miRNA 3' CACGAGAGAUAGAAGACAGU 5'
	|||||| || ||||||||||
	target 5' GUGCUCACUCUCUUCUGUCA 3'
13	>mdm-miR156aa	MSTRG.121644.1 Chr15 11397931-11421666	score:3	range:314-333
	miRNA 3' CACGAGAGAUAGAAGACAGU 5'
	|||||| || ||||||||||
	target 5' GUGCUCACUCUCUUCUGUCA 3'
14	>mdm-miR156aa	MSTRG.121641.28 Chr15 11421313-11433593	score:3	range:5355-5374
	miRNA 3' CACGAGAGAUAGAAGACAGU 5'
	|||||| || ||||||||||
	target 5' GUGCUCACUCUCUUCUGUCA 3'
15	>mdm-miR156aa	MSTRG.121641.31 Chr15 11421328-11433637	score:3	range:5526-5545
	miRNA 3' CACGAGAGAUAGAAGACAGU 5'
	|||||| || ||||||||||
	target 5' GUGCUCACUCUCUUCUGUCA 3'
16	>mdm-miR156aa	MSTRG.121641.3 Chr15 11392172-11433593	score:3	range:6047-6066
	miRNA 3' CACGAGAGAUAGAAGACAGU 5'
	|||||| || ||||||||||
	target 5' GUGCUCACUCUCUUCUGUCA 3'
17	>mdm-miR156aa	MSTRG.121641.32 Chr15 11421328-11433637	score:3	range:6006-6025
	miRNA 3' CACGAGAGAUAGAAGACAGU 5'
	|||||| || ||||||||||
	target 5' GUGCUCACUCUCUUCUGUCA 3'
18	>mdm-miR156aa	MSTRG.63448.2 Chr08 5220698-5222177	score:3	range:308-327
	miRNA 3' CACGAGAGAUAGAAGACAGU 5'
	|||||| || ||||||||||
	target 5' GUGCUCACUCUCUUCUGUCA 3'
19	>mdm-miR156ab	MSTRG.17430.4 Chr02 13244956-13245809	score:3	range:109-129
	miRNA 3' CACGAGAGAUAGAAGACAGUU 5'
	|||||| || |||||||||||
	target 5' GUGCUCACUCUCUUCUGUCAA 3'
20	>mdm-miR156ab	MSTRG.121641.37 Chr15 11421520-11433603	score:3	range:1101-1121
	miRNA 3' CACGAGAGAUAGAAGACAGUU 5'
	|||||| || |||||||||||
	target 5' GUGCUCACUCUCUUCUGUCAA 3'
21	>mdm-miR156ab	MSTRG.121641.36 Chr15 11421495-11433601	score:3	range:1129-1149
	miRNA 3' CACGAGAGAUAGAAGACAGUU 5'
	|||||| || |||||||||||
	target 5' GUGCUCACUCUCUUCUGUCAA 3'
22	>mdm-miR156ab	MSTRG.121641.35 Chr15 11421468-11433593	score:3	range:1385-1405
	miRNA 3' CACGAGAGAUAGAAGACAGUU 5'
	|||||| || |||||||||||
	target 5' GUGCUCACUCUCUUCUGUCAA 3'
23	>mdm-miR156ab	MSTRG.121641.29 Chr15 11421328-11433637	score:3	range:1522-1542
	miRNA 3' CACGAGAGAUAGAAGACAGUU 5'
	|||||| || |||||||||||
	target 5' GUGCUCACUCUCUUCUGUCAA 3'
24	>mdm-miR156ab	MSTRG.121641.34 Chr15 11421468-11433593	score:3	range:1862-1882
	miRNA 3' CACGAGAGAUAGAAGACAGUU 5'
	|||||| || |||||||||||
	target 5' GUGCUCACUCUCUUCUGUCAA 3'
25	>mdm-miR156ab	MSTRG.121644.1 Chr15 11397931-11421666	score:3	range:314-334
	miRNA 3' CACGAGAGAUAGAAGACAGUU 5'
	|||||| || |||||||||||
	target 5' GUGCUCACUCUCUUCUGUCAA 3'
26	>mdm-miR156ab	MSTRG.121641.28 Chr15 11421313-11433593	score:3	range:5355-5375
	miRNA 3' CACGAGAGAUAGAAGACAGUU 5'
	|||||| || |||||||||||
	target 5' GUGCUCACUCUCUUCUGUCAA 3'
27	>mdm-miR156ab	MSTRG.121641.31 Chr15 11421328-11433637	score:3	range:5526-5546
	miRNA 3' CACGAGAGAUAGAAGACAGUU 5'
	|||||| || |||||||||||
	target 5' GUGCUCACUCUCUUCUGUCAA 3'
28	>mdm-miR156ab	MSTRG.121641.3 Chr15 11392172-11433593	score:3	range:6047-6067
	miRNA 3' CACGAGAGAUAGAAGACAGUU 5'
	|||||| || |||||||||||
	target 5' GUGCUCACUCUCUUCUGUCAA 3'
29	>mdm-miR156ab	MSTRG.121641.32 Chr15 11421328-11433637	score:3	range:6006-6026
	miRNA 3' CACGAGAGAUAGAAGACAGUU 5'
	|||||| || |||||||||||
	target 5' GUGCUCACUCUCUUCUGUCAA 3'
30	>mdm-miR156ac	MSTRG.17430.4 Chr02 13244956-13245809	score:3	range:109-129
	miRNA 3' CACGAGAGAUAGAAGACAGUU 5'
	|||||| || |||||||||||
	target 5' GUGCUCACUCUCUUCUGUCAA 3'
31	>mdm-miR156ac	MSTRG.121641.37 Chr15 11421520-11433603	score:3	range:1101-1121
	miRNA 3' CACGAGAGAUAGAAGACAGUU 5'
	|||||| || |||||||||||
	target 5' GUGCUCACUCUCUUCUGUCAA 3'
32	>mdm-miR156ac	MSTRG.121641.36 Chr15 11421495-11433601	score:3	range:1129-1149
	miRNA 3' CACGAGAGAUAGAAGACAGUU 5'
	|||||| || |||||||||||
	target 5' GUGCUCACUCUCUUCUGUCAA 3'
33	>mdm-miR156ac	MSTRG.121641.35 Chr15 11421468-11433593	score:3	range:1385-1405
	miRNA 3' CACGAGAGAUAGAAGACAGUU 5'
	|||||| || |||||||||||
	target 5' GUGCUCACUCUCUUCUGUCAA 3'
34	>mdm-miR156ac	MSTRG.121641.29 Chr15 11421328-11433637	score:3	range:1522-1542
	miRNA 3' CACGAGAGAUAGAAGACAGUU 5'
	|||||| || |||||||||||
	target 5' GUGCUCACUCUCUUCUGUCAA 3'
35	>mdm-miR156ac	MSTRG.121641.34 Chr15 11421468-11433593	score:3	range:1862-1882
	miRNA 3' CACGAGAGAUAGAAGACAGUU 5'
	|||||| || |||||||||||
	target 5' GUGCUCACUCUCUUCUGUCAA 3'
36	>mdm-miR156ac	MSTRG.121644.1 Chr15 11397931-11421666	score:3	range:314-334
	miRNA 3' CACGAGAGAUAGAAGACAGUU 5'
	|||||| || |||||||||||
	target 5' GUGCUCACUCUCUUCUGUCAA 3'
37	>mdm-miR156ac	MSTRG.121641.28 Chr15 11421313-11433593	score:3	range:5355-5375
	miRNA 3' CACGAGAGAUAGAAGACAGUU 5'
	|||||| || |||||||||||
	target 5' GUGCUCACUCUCUUCUGUCAA 3'
38	>mdm-miR156ac	MSTRG.121641.31 Chr15 11421328-11433637	score:3	range:5526-5546
	miRNA 3' CACGAGAGAUAGAAGACAGUU 5'
	|||||| || |||||||||||
	target 5' GUGCUCACUCUCUUCUGUCAA 3'
39	>mdm-miR156ac	MSTRG.121641.3 Chr15 11392172-11433593	score:3	range:6047-6067
	miRNA 3' CACGAGAGAUAGAAGACAGUU 5'
	|||||| || |||||||||||
	target 5' GUGCUCACUCUCUUCUGUCAA 3'
40	>mdm-miR156ac	MSTRG.121641.32 Chr15 11421328-11433637	score:3	range:6006-6026
	miRNA 3' CACGAGAGAUAGAAGACAGUU 5'
	|||||| || |||||||||||
	target 5' GUGCUCACUCUCUUCUGUCAA 3'
41	>mdm-miR156ad	MSTRG.17430.4 Chr02 13244956-13245809	score:2	range:109-128
	miRNA 3' CACGAGUGAAAGAAGACAGU 5'
	||||||||| ||||||||||
	target 5' GUGCUCACUCUCUUCUGUCA 3'
42	>mdm-miR156ad	MSTRG.121641.37 Chr15 11421520-11433603	score:2	range:1101-1120
	miRNA 3' CACGAGUGAAAGAAGACAGU 5'
	||||||||| ||||||||||
	target 5' GUGCUCACUCUCUUCUGUCA 3'
43	>mdm-miR156ad	MSTRG.121641.36 Chr15 11421495-11433601	score:2	range:1129-1148
	miRNA 3' CACGAGUGAAAGAAGACAGU 5'
	||||||||| ||||||||||
	target 5' GUGCUCACUCUCUUCUGUCA 3'
44	>mdm-miR156ad	MSTRG.121641.35 Chr15 11421468-11433593	score:2	range:1385-1404
	miRNA 3' CACGAGUGAAAGAAGACAGU 5'
	||||||||| ||||||||||
	target 5' GUGCUCACUCUCUUCUGUCA 3'
45	>mdm-miR156ad	MSTRG.121641.29 Chr15 11421328-11433637	score:2	range:1522-1541
	miRNA 3' CACGAGUGAAAGAAGACAGU 5'
	||||||||| ||||||||||
	target 5' GUGCUCACUCUCUUCUGUCA 3'
46	>mdm-miR156ad	MSTRG.121641.34 Chr15 11421468-11433593	score:2	range:1862-1881
	miRNA 3' CACGAGUGAAAGAAGACAGU 5'
	||||||||| ||||||||||
	target 5' GUGCUCACUCUCUUCUGUCA 3'
47	>mdm-miR156ad	MSTRG.121644.1 Chr15 11397931-11421666	score:2	range:314-333
	miRNA 3' CACGAGUGAAAGAAGACAGU 5'
	||||||||| ||||||||||
	target 5' GUGCUCACUCUCUUCUGUCA 3'
48	>mdm-miR156ad	MSTRG.121641.28 Chr15 11421313-11433593	score:2	range:5355-5374
	miRNA 3' CACGAGUGAAAGAAGACAGU 5'
	||||||||| ||||||||||
	target 5' GUGCUCACUCUCUUCUGUCA 3'
49	>mdm-miR156ad	MSTRG.121641.31 Chr15 11421328-11433637	score:2	range:5526-5545
	miRNA 3' CACGAGUGAAAGAAGACAGU 5'
	||||||||| ||||||||||
	target 5' GUGCUCACUCUCUUCUGUCA 3'
50	>mdm-miR156ad	MSTRG.121641.3 Chr15 11392172-11433593	score:2	range:6047-6066
	miRNA 3' CACGAGUGAAAGAAGACAGU 5'
	||||||||| ||||||||||
	target 5' GUGCUCACUCUCUUCUGUCA 3'
51	>mdm-miR156ad	MSTRG.121641.32 Chr15 11421328-11433637	score:2	range:6006-6025
	miRNA 3' CACGAGUGAAAGAAGACAGU 5'
	||||||||| ||||||||||
	target 5' GUGCUCACUCUCUUCUGUCA 3'
52	>mdm-miR156ad	MSTRG.63448.2 Chr08 5220698-5222177	score:2	range:308-327
	miRNA 3' CACGAGUGAAAGAAGACAGU 5'
	||||||||| ||||||||||
	target 5' GUGCUCACUCUCUUCUGUCA 3'
53	>mdm-miR156ad	MSTRG.121644.8 Chr15 11433222-11434086	score:3	range:253-272
	miRNA 3' CACGAGUGAAAGAAGACAGU 5'
	| ||||||| ||||||||||
	target 5' GAGCUCACUCUCUUCUGUCA 3'
54	>mdm-miR156ad	MSTRG.72790.6 Chr09 13194758-13198545	score:3	range:1340-1358
	miRNA 3' CACGAGUGAAAGAAGACAGU 5'
	||||||| ||||||:|||||
	target 5' GUGCUCA-UUUCUUUUGUCA 3'
55	>mdm-miR156ae	MSTRG.17430.4 Chr02 13244956-13245809	score:2	range:109-128
	miRNA 3' CACGAGUGAAAGAAGACAGU 5'
	||||||||| ||||||||||
	target 5' GUGCUCACUCUCUUCUGUCA 3'
56	>mdm-miR156ae	MSTRG.121641.37 Chr15 11421520-11433603	score:2	range:1101-1120
	miRNA 3' CACGAGUGAAAGAAGACAGU 5'
	||||||||| ||||||||||
	target 5' GUGCUCACUCUCUUCUGUCA 3'
57	>mdm-miR156ae	MSTRG.121641.36 Chr15 11421495-11433601	score:2	range:1129-1148
	miRNA 3' CACGAGUGAAAGAAGACAGU 5'
	||||||||| ||||||||||
	target 5' GUGCUCACUCUCUUCUGUCA 3'
58	>mdm-miR156ae	MSTRG.121641.35 Chr15 11421468-11433593	score:2	range:1385-1404
	miRNA 3' CACGAGUGAAAGAAGACAGU 5'
	||||||||| ||||||||||
	target 5' GUGCUCACUCUCUUCUGUCA 3'
59	>mdm-miR156ae	MSTRG.121641.29 Chr15 11421328-11433637	score:2	range:1522-1541
	miRNA 3' CACGAGUGAAAGAAGACAGU 5'
	||||||||| ||||||||||
	target 5' GUGCUCACUCUCUUCUGUCA 3'
60	>mdm-miR156ae	MSTRG.121641.34 Chr15 11421468-11433593	score:2	range:1862-1881
	miRNA 3' CACGAGUGAAAGAAGACAGU 5'
	||||||||| ||||||||||
	target 5' GUGCUCACUCUCUUCUGUCA 3'
61	>mdm-miR156ae	MSTRG.121644.1 Chr15 11397931-11421666	score:2	range:314-333
	miRNA 3' CACGAGUGAAAGAAGACAGU 5'
	||||||||| ||||||||||
	target 5' GUGCUCACUCUCUUCUGUCA 3'
62	>mdm-miR156ae	MSTRG.121641.28 Chr15 11421313-11433593	score:2	range:5355-5374
	miRNA 3' CACGAGUGAAAGAAGACAGU 5'
	||||||||| ||||||||||
	target 5' GUGCUCACUCUCUUCUGUCA 3'
63	>mdm-miR156ae	MSTRG.121641.31 Chr15 11421328-11433637	score:2	range:5526-5545
	miRNA 3' CACGAGUGAAAGAAGACAGU 5'
	||||||||| ||||||||||
	target 5' GUGCUCACUCUCUUCUGUCA 3'
64	>mdm-miR156ae	MSTRG.121641.3 Chr15 11392172-11433593	score:2	range:6047-6066
	miRNA 3' CACGAGUGAAAGAAGACAGU 5'
	||||||||| ||||||||||
	target 5' GUGCUCACUCUCUUCUGUCA 3'
65	>mdm-miR156ae	MSTRG.121641.32 Chr15 11421328-11433637	score:2	range:6006-6025
	miRNA 3' CACGAGUGAAAGAAGACAGU 5'
	||||||||| ||||||||||
	target 5' GUGCUCACUCUCUUCUGUCA 3'
66	>mdm-miR156ae	MSTRG.63448.2 Chr08 5220698-5222177	score:2	range:308-327
	miRNA 3' CACGAGUGAAAGAAGACAGU 5'
	||||||||| ||||||||||
	target 5' GUGCUCACUCUCUUCUGUCA 3'
67	>mdm-miR156ae	MSTRG.121644.8 Chr15 11433222-11434086	score:3	range:253-272
	miRNA 3' CACGAGUGAAAGAAGACAGU 5'
	| ||||||| ||||||||||
	target 5' GAGCUCACUCUCUUCUGUCA 3'
68	>mdm-miR156ae	MSTRG.72790.6 Chr09 13194758-13198545	score:3	range:1340-1358
	miRNA 3' CACGAGUGAAAGAAGACAGU 5'
	||||||| ||||||:|||||
	target 5' GUGCUCA-UUUCUUUUGUCA 3'
69	>mdm-miR156a	MSTRG.17430.4 Chr02 13244956-13245809	score:0	range:109-128
	miRNA 3' CACGAGUGAGAGAAGACAGU 5'
	||||||||||||||||||||
	target 5' GUGCUCACUCUCUUCUGUCA 3'
70	>mdm-miR156a	MSTRG.121641.37 Chr15 11421520-11433603	score:0	range:1101-1120
	miRNA 3' CACGAGUGAGAGAAGACAGU 5'
	||||||||||||||||||||
	target 5' GUGCUCACUCUCUUCUGUCA 3'
71	>mdm-miR156a	MSTRG.121641.36 Chr15 11421495-11433601	score:0	range:1129-1148
	miRNA 3' CACGAGUGAGAGAAGACAGU 5'
	||||||||||||||||||||
	target 5' GUGCUCACUCUCUUCUGUCA 3'
72	>mdm-miR156a	MSTRG.121641.35 Chr15 11421468-11433593	score:0	range:1385-1404
	miRNA 3' CACGAGUGAGAGAAGACAGU 5'
	||||||||||||||||||||
	target 5' GUGCUCACUCUCUUCUGUCA 3'
73	>mdm-miR156a	MSTRG.121641.29 Chr15 11421328-11433637	score:0	range:1522-1541
	miRNA 3' CACGAGUGAGAGAAGACAGU 5'
	||||||||||||||||||||
	target 5' GUGCUCACUCUCUUCUGUCA 3'
74	>mdm-miR156a	MSTRG.121641.34 Chr15 11421468-11433593	score:0	range:1862-1881
	miRNA 3' CACGAGUGAGAGAAGACAGU 5'
	||||||||||||||||||||
	target 5' GUGCUCACUCUCUUCUGUCA 3'
75	>mdm-miR156a	MSTRG.121644.1 Chr15 11397931-11421666	score:0	range:314-333
	miRNA 3' CACGAGUGAGAGAAGACAGU 5'
	||||||||||||||||||||
	target 5' GUGCUCACUCUCUUCUGUCA 3'
76	>mdm-miR156a	MSTRG.121641.28 Chr15 11421313-11433593	score:0	range:5355-5374
	miRNA 3' CACGAGUGAGAGAAGACAGU 5'
	||||||||||||||||||||
	target 5' GUGCUCACUCUCUUCUGUCA 3'
77	>mdm-miR156a	MSTRG.121641.31 Chr15 11421328-11433637	score:0	range:5526-5545
	miRNA 3' CACGAGUGAGAGAAGACAGU 5'
	||||||||||||||||||||
	target 5' GUGCUCACUCUCUUCUGUCA 3'
78	>mdm-miR156a	MSTRG.121641.3 Chr15 11392172-11433593	score:0	range:6047-6066
	miRNA 3' CACGAGUGAGAGAAGACAGU 5'
	||||||||||||||||||||
	target 5' GUGCUCACUCUCUUCUGUCA 3'
79	>mdm-miR156a	MSTRG.121641.32 Chr15 11421328-11433637	score:0	range:6006-6025
	miRNA 3' CACGAGUGAGAGAAGACAGU 5'
	||||||||||||||||||||
	target 5' GUGCUCACUCUCUUCUGUCA 3'
80	>mdm-miR156a	MSTRG.63448.2 Chr08 5220698-5222177	score:0	range:308-327
	miRNA 3' CACGAGUGAGAGAAGACAGU 5'
	||||||||||||||||||||
	target 5' GUGCUCACUCUCUUCUGUCA 3'
81	>mdm-miR156a	MSTRG.121644.8 Chr15 11433222-11434086	score:1	range:253-272
	miRNA 3' CACGAGUGAGAGAAGACAGU 5'
	| ||||||||||||||||||
	target 5' GAGCUCACUCUCUUCUGUCA 3'
82	>mdm-miR156a	MSTRG.121644.3 Chr15 11397969-11398957	score:2	range:208-227
	miRNA 3' CACGAGUGAGAGAAGACAGU 5'
	||||||||||||||||||
	target 5' CAGCUCACUCUCUUCUGUCA 3'
83	>mdm-miR156a	MSTRG.121644.5 Chr15 11417886-11419971	score:2	range:270-289
	miRNA 3' CACGAGUGAGAGAAGACAGU 5'
	||||||||||||||||||
	target 5' CAGCUCACUCUCUUCUGUCA 3'
84	>mdm-miR156a	MSTRG.55073.5 Chr07 6239062-6240209	score:2.5	range:944-962
	miRNA 3' CACGAGUGAGAGAAGACAGU 5'
	||||||||||||||| |||:
	target 5' GUGCUCACUCUCUUC-GUCG 3'
85	>mdm-miR156b	MSTRG.17430.4 Chr02 13244956-13245809	score:0	range:109-128
	miRNA 3' CACGAGUGAGAGAAGACAGU 5'
	||||||||||||||||||||
	target 5' GUGCUCACUCUCUUCUGUCA 3'
86	>mdm-miR156b	MSTRG.121641.37 Chr15 11421520-11433603	score:0	range:1101-1120
	miRNA 3' CACGAGUGAGAGAAGACAGU 5'
	||||||||||||||||||||
	target 5' GUGCUCACUCUCUUCUGUCA 3'
87	>mdm-miR156b	MSTRG.121641.36 Chr15 11421495-11433601	score:0	range:1129-1148
	miRNA 3' CACGAGUGAGAGAAGACAGU 5'
	||||||||||||||||||||
	target 5' GUGCUCACUCUCUUCUGUCA 3'
88	>mdm-miR156b	MSTRG.121641.35 Chr15 11421468-11433593	score:0	range:1385-1404
	miRNA 3' CACGAGUGAGAGAAGACAGU 5'
	||||||||||||||||||||
	target 5' GUGCUCACUCUCUUCUGUCA 3'
89	>mdm-miR156b	MSTRG.121641.29 Chr15 11421328-11433637	score:0	range:1522-1541
	miRNA 3' CACGAGUGAGAGAAGACAGU 5'
	||||||||||||||||||||
	target 5' GUGCUCACUCUCUUCUGUCA 3'
90	>mdm-miR156b	MSTRG.121641.34 Chr15 11421468-11433593	score:0	range:1862-1881
	miRNA 3' CACGAGUGAGAGAAGACAGU 5'
	||||||||||||||||||||
	target 5' GUGCUCACUCUCUUCUGUCA 3'
91	>mdm-miR156b	MSTRG.121644.1 Chr15 11397931-11421666	score:0	range:314-333
	miRNA 3' CACGAGUGAGAGAAGACAGU 5'
	||||||||||||||||||||
	target 5' GUGCUCACUCUCUUCUGUCA 3'
92	>mdm-miR156b	MSTRG.121641.28 Chr15 11421313-11433593	score:0	range:5355-5374
	miRNA 3' CACGAGUGAGAGAAGACAGU 5'
	||||||||||||||||||||
	target 5' GUGCUCACUCUCUUCUGUCA 3'
93	>mdm-miR156b	MSTRG.121641.31 Chr15 11421328-11433637	score:0	range:5526-5545
	miRNA 3' CACGAGUGAGAGAAGACAGU 5'
	||||||||||||||||||||
	target 5' GUGCUCACUCUCUUCUGUCA 3'
94	>mdm-miR156b	MSTRG.121641.3 Chr15 11392172-11433593	score:0	range:6047-6066
	miRNA 3' CACGAGUGAGAGAAGACAGU 5'
	||||||||||||||||||||
	target 5' GUGCUCACUCUCUUCUGUCA 3'
95	>mdm-miR156b	MSTRG.121641.32 Chr15 11421328-11433637	score:0	range:6006-6025
	miRNA 3' CACGAGUGAGAGAAGACAGU 5'
	||||||||||||||||||||
	target 5' GUGCUCACUCUCUUCUGUCA 3'
96	>mdm-miR156b	MSTRG.63448.2 Chr08 5220698-5222177	score:0	range:308-327
	miRNA 3' CACGAGUGAGAGAAGACAGU 5'
	||||||||||||||||||||
	target 5' GUGCUCACUCUCUUCUGUCA 3'
97	>mdm-miR156b	MSTRG.121644.8 Chr15 11433222-11434086	score:1	range:253-272
	miRNA 3' CACGAGUGAGAGAAGACAGU 5'
	| ||||||||||||||||||
	target 5' GAGCUCACUCUCUUCUGUCA 3'
98	>mdm-miR156b	MSTRG.121644.3 Chr15 11397969-11398957	score:2	range:208-227
	miRNA 3' CACGAGUGAGAGAAGACAGU 5'
	||||||||||||||||||
	target 5' CAGCUCACUCUCUUCUGUCA 3'
99	>mdm-miR156b	MSTRG.121644.5 Chr15 11417886-11419971	score:2	range:270-289
	miRNA 3' CACGAGUGAGAGAAGACAGU 5'
	||||||||||||||||||
	target 5' CAGCUCACUCUCUUCUGUCA 3'
100	>mdm-miR156b	MSTRG.55073.5 Chr07 6239062-6240209	score:2.5	range:944-962
	miRNA 3' CACGAGUGAGAGAAGACAGU 5'
	||||||||||||||| |||:
	target 5' GUGCUCACUCUCUUC-GUCG 3'
101	>mdm-miR156c	MSTRG.17430.4 Chr02 13244956-13245809	score:0	range:109-128
	miRNA 3' CACGAGUGAGAGAAGACAGU 5'
	||||||||||||||||||||
	target 5' GUGCUCACUCUCUUCUGUCA 3'
102	>mdm-miR156c	MSTRG.121641.37 Chr15 11421520-11433603	score:0	range:1101-1120
	miRNA 3' CACGAGUGAGAGAAGACAGU 5'
	||||||||||||||||||||
	target 5' GUGCUCACUCUCUUCUGUCA 3'
103	>mdm-miR156c	MSTRG.121641.36 Chr15 11421495-11433601	score:0	range:1129-1148
	miRNA 3' CACGAGUGAGAGAAGACAGU 5'
	||||||||||||||||||||
	target 5' GUGCUCACUCUCUUCUGUCA 3'
104	>mdm-miR156c	MSTRG.121641.35 Chr15 11421468-11433593	score:0	range:1385-1404
	miRNA 3' CACGAGUGAGAGAAGACAGU 5'
	||||||||||||||||||||
	target 5' GUGCUCACUCUCUUCUGUCA 3'
105	>mdm-miR156c	MSTRG.121641.29 Chr15 11421328-11433637	score:0	range:1522-1541
	miRNA 3' CACGAGUGAGAGAAGACAGU 5'
	||||||||||||||||||||
	target 5' GUGCUCACUCUCUUCUGUCA 3'
106	>mdm-miR156c	MSTRG.121641.34 Chr15 11421468-11433593	score:0	range:1862-1881
	miRNA 3' CACGAGUGAGAGAAGACAGU 5'
	||||||||||||||||||||
	target 5' GUGCUCACUCUCUUCUGUCA 3'
107	>mdm-miR156c	MSTRG.121644.1 Chr15 11397931-11421666	score:0	range:314-333
	miRNA 3' CACGAGUGAGAGAAGACAGU 5'
	||||||||||||||||||||
	target 5' GUGCUCACUCUCUUCUGUCA 3'
108	>mdm-miR156c	MSTRG.121641.28 Chr15 11421313-11433593	score:0	range:5355-5374
	miRNA 3' CACGAGUGAGAGAAGACAGU 5'
	||||||||||||||||||||
	target 5' GUGCUCACUCUCUUCUGUCA 3'
109	>mdm-miR156c	MSTRG.121641.31 Chr15 11421328-11433637	score:0	range:5526-5545
	miRNA 3' CACGAGUGAGAGAAGACAGU 5'
	||||||||||||||||||||
	target 5' GUGCUCACUCUCUUCUGUCA 3'
110	>mdm-miR156c	MSTRG.121641.3 Chr15 11392172-11433593	score:0	range:6047-6066
	miRNA 3' CACGAGUGAGAGAAGACAGU 5'
	||||||||||||||||||||
	target 5' GUGCUCACUCUCUUCUGUCA 3'
111	>mdm-miR156c	MSTRG.121641.32 Chr15 11421328-11433637	score:0	range:6006-6025
	miRNA 3' CACGAGUGAGAGAAGACAGU 5'
	||||||||||||||||||||
	target 5' GUGCUCACUCUCUUCUGUCA 3'
112	>mdm-miR156c	MSTRG.63448.2 Chr08 5220698-5222177	score:0	range:308-327
	miRNA 3' CACGAGUGAGAGAAGACAGU 5'
	||||||||||||||||||||
	target 5' GUGCUCACUCUCUUCUGUCA 3'
113	>mdm-miR156c	MSTRG.121644.8 Chr15 11433222-11434086	score:1	range:253-272
	miRNA 3' CACGAGUGAGAGAAGACAGU 5'
	| ||||||||||||||||||
	target 5' GAGCUCACUCUCUUCUGUCA 3'
114	>mdm-miR156c	MSTRG.121644.3 Chr15 11397969-11398957	score:2	range:208-227
	miRNA 3' CACGAGUGAGAGAAGACAGU 5'
	||||||||||||||||||
	target 5' CAGCUCACUCUCUUCUGUCA 3'
115	>mdm-miR156c	MSTRG.121644.5 Chr15 11417886-11419971	score:2	range:270-289
	miRNA 3' CACGAGUGAGAGAAGACAGU 5'
	||||||||||||||||||
	target 5' CAGCUCACUCUCUUCUGUCA 3'
116	>mdm-miR156c	MSTRG.55073.5 Chr07 6239062-6240209	score:2.5	range:944-962
	miRNA 3' CACGAGUGAGAGAAGACAGU 5'
	||||||||||||||| |||:
	target 5' GUGCUCACUCUCUUC-GUCG 3'
117	>mdm-miR156d	MSTRG.17430.4 Chr02 13244956-13245809	score:0	range:109-128
	miRNA 3' CACGAGUGAGAGAAGACAGU 5'
	||||||||||||||||||||
	target 5' GUGCUCACUCUCUUCUGUCA 3'
118	>mdm-miR156d	MSTRG.121641.37 Chr15 11421520-11433603	score:0	range:1101-1120
	miRNA 3' CACGAGUGAGAGAAGACAGU 5'
	||||||||||||||||||||
	target 5' GUGCUCACUCUCUUCUGUCA 3'
119	>mdm-miR156d	MSTRG.121641.36 Chr15 11421495-11433601	score:0	range:1129-1148
	miRNA 3' CACGAGUGAGAGAAGACAGU 5'
	||||||||||||||||||||
	target 5' GUGCUCACUCUCUUCUGUCA 3'
120	>mdm-miR156d	MSTRG.121641.35 Chr15 11421468-11433593	score:0	range:1385-1404
	miRNA 3' CACGAGUGAGAGAAGACAGU 5'
	||||||||||||||||||||
	target 5' GUGCUCACUCUCUUCUGUCA 3'
121	>mdm-miR156d	MSTRG.121641.29 Chr15 11421328-11433637	score:0	range:1522-1541
	miRNA 3' CACGAGUGAGAGAAGACAGU 5'
	||||||||||||||||||||
	target 5' GUGCUCACUCUCUUCUGUCA 3'
122	>mdm-miR156d	MSTRG.121641.34 Chr15 11421468-11433593	score:0	range:1862-1881
	miRNA 3' CACGAGUGAGAGAAGACAGU 5'
	||||||||||||||||||||
	target 5' GUGCUCACUCUCUUCUGUCA 3'
123	>mdm-miR156d	MSTRG.121644.1 Chr15 11397931-11421666	score:0	range:314-333
	miRNA 3' CACGAGUGAGAGAAGACAGU 5'
	||||||||||||||||||||
	target 5' GUGCUCACUCUCUUCUGUCA 3'
124	>mdm-miR156d	MSTRG.121641.28 Chr15 11421313-11433593	score:0	range:5355-5374
	miRNA 3' CACGAGUGAGAGAAGACAGU 5'
	||||||||||||||||||||
	target 5' GUGCUCACUCUCUUCUGUCA 3'
125	>mdm-miR156d	MSTRG.121641.31 Chr15 11421328-11433637	score:0	range:5526-5545
	miRNA 3' CACGAGUGAGAGAAGACAGU 5'
	||||||||||||||||||||
	target 5' GUGCUCACUCUCUUCUGUCA 3'
126	>mdm-miR156d	MSTRG.121641.3 Chr15 11392172-11433593	score:0	range:6047-6066
	miRNA 3' CACGAGUGAGAGAAGACAGU 5'
	||||||||||||||||||||
	target 5' GUGCUCACUCUCUUCUGUCA 3'
127	>mdm-miR156d	MSTRG.121641.32 Chr15 11421328-11433637	score:0	range:6006-6025
	miRNA 3' CACGAGUGAGAGAAGACAGU 5'
	||||||||||||||||||||
	target 5' GUGCUCACUCUCUUCUGUCA 3'
128	>mdm-miR156d	MSTRG.63448.2 Chr08 5220698-5222177	score:0	range:308-327
	miRNA 3' CACGAGUGAGAGAAGACAGU 5'
	||||||||||||||||||||
	target 5' GUGCUCACUCUCUUCUGUCA 3'
129	>mdm-miR156d	MSTRG.121644.8 Chr15 11433222-11434086	score:1	range:253-272
	miRNA 3' CACGAGUGAGAGAAGACAGU 5'
	| ||||||||||||||||||
	target 5' GAGCUCACUCUCUUCUGUCA 3'
130	>mdm-miR156d	MSTRG.121644.3 Chr15 11397969-11398957	score:2	range:208-227
	miRNA 3' CACGAGUGAGAGAAGACAGU 5'
	||||||||||||||||||
	target 5' CAGCUCACUCUCUUCUGUCA 3'
131	>mdm-miR156d	MSTRG.121644.5 Chr15 11417886-11419971	score:2	range:270-289
	miRNA 3' CACGAGUGAGAGAAGACAGU 5'
	||||||||||||||||||
	target 5' CAGCUCACUCUCUUCUGUCA 3'
132	>mdm-miR156d	MSTRG.55073.5 Chr07 6239062-6240209	score:2.5	range:944-962
	miRNA 3' CACGAGUGAGAGAAGACAGU 5'
	||||||||||||||| |||:
	target 5' GUGCUCACUCUCUUC-GUCG 3'
133	>mdm-miR156e	MSTRG.17430.4 Chr02 13244956-13245809	score:0	range:109-128
	miRNA 3' CACGAGUGAGAGAAGACAGU 5'
	||||||||||||||||||||
	target 5' GUGCUCACUCUCUUCUGUCA 3'
134	>mdm-miR156e	MSTRG.121641.37 Chr15 11421520-11433603	score:0	range:1101-1120
	miRNA 3' CACGAGUGAGAGAAGACAGU 5'
	||||||||||||||||||||
	target 5' GUGCUCACUCUCUUCUGUCA 3'
135	>mdm-miR156e	MSTRG.121641.36 Chr15 11421495-11433601	score:0	range:1129-1148
	miRNA 3' CACGAGUGAGAGAAGACAGU 5'
	||||||||||||||||||||
	target 5' GUGCUCACUCUCUUCUGUCA 3'
136	>mdm-miR156e	MSTRG.121641.35 Chr15 11421468-11433593	score:0	range:1385-1404
	miRNA 3' CACGAGUGAGAGAAGACAGU 5'
	||||||||||||||||||||
	target 5' GUGCUCACUCUCUUCUGUCA 3'
137	>mdm-miR156e	MSTRG.121641.29 Chr15 11421328-11433637	score:0	range:1522-1541
	miRNA 3' CACGAGUGAGAGAAGACAGU 5'
	||||||||||||||||||||
	target 5' GUGCUCACUCUCUUCUGUCA 3'
138	>mdm-miR156e	MSTRG.121641.34 Chr15 11421468-11433593	score:0	range:1862-1881
	miRNA 3' CACGAGUGAGAGAAGACAGU 5'
	||||||||||||||||||||
	target 5' GUGCUCACUCUCUUCUGUCA 3'
139	>mdm-miR156e	MSTRG.121644.1 Chr15 11397931-11421666	score:0	range:314-333
	miRNA 3' CACGAGUGAGAGAAGACAGU 5'
	||||||||||||||||||||
	target 5' GUGCUCACUCUCUUCUGUCA 3'
140	>mdm-miR156e	MSTRG.121641.28 Chr15 11421313-11433593	score:0	range:5355-5374
	miRNA 3' CACGAGUGAGAGAAGACAGU 5'
	||||||||||||||||||||
	target 5' GUGCUCACUCUCUUCUGUCA 3'
141	>mdm-miR156e	MSTRG.121641.31 Chr15 11421328-11433637	score:0	range:5526-5545
	miRNA 3' CACGAGUGAGAGAAGACAGU 5'
	||||||||||||||||||||
	target 5' GUGCUCACUCUCUUCUGUCA 3'
142	>mdm-miR156e	MSTRG.121641.3 Chr15 11392172-11433593	score:0	range:6047-6066
	miRNA 3' CACGAGUGAGAGAAGACAGU 5'
	||||||||||||||||||||
	target 5' GUGCUCACUCUCUUCUGUCA 3'
143	>mdm-miR156e	MSTRG.121641.32 Chr15 11421328-11433637	score:0	range:6006-6025
	miRNA 3' CACGAGUGAGAGAAGACAGU 5'
	||||||||||||||||||||
	target 5' GUGCUCACUCUCUUCUGUCA 3'
144	>mdm-miR156e	MSTRG.63448.2 Chr08 5220698-5222177	score:0	range:308-327
	miRNA 3' CACGAGUGAGAGAAGACAGU 5'
	||||||||||||||||||||
	target 5' GUGCUCACUCUCUUCUGUCA 3'
145	>mdm-miR156e	MSTRG.121644.8 Chr15 11433222-11434086	score:1	range:253-272
	miRNA 3' CACGAGUGAGAGAAGACAGU 5'
	| ||||||||||||||||||
	target 5' GAGCUCACUCUCUUCUGUCA 3'
146	>mdm-miR156e	MSTRG.121644.3 Chr15 11397969-11398957	score:2	range:208-227
	miRNA 3' CACGAGUGAGAGAAGACAGU 5'
	||||||||||||||||||
	target 5' CAGCUCACUCUCUUCUGUCA 3'
147	>mdm-miR156e	MSTRG.121644.5 Chr15 11417886-11419971	score:2	range:270-289
	miRNA 3' CACGAGUGAGAGAAGACAGU 5'
	||||||||||||||||||
	target 5' CAGCUCACUCUCUUCUGUCA 3'
148	>mdm-miR156e	MSTRG.55073.5 Chr07 6239062-6240209	score:2.5	range:944-962
	miRNA 3' CACGAGUGAGAGAAGACAGU 5'
	||||||||||||||| |||:
	target 5' GUGCUCACUCUCUUC-GUCG 3'
149	>mdm-miR156f	MSTRG.17430.4 Chr02 13244956-13245809	score:0	range:109-128
	miRNA 3' CACGAGUGAGAGAAGACAGU 5'
	||||||||||||||||||||
	target 5' GUGCUCACUCUCUUCUGUCA 3'
150	>mdm-miR156f	MSTRG.121641.37 Chr15 11421520-11433603	score:0	range:1101-1120
	miRNA 3' CACGAGUGAGAGAAGACAGU 5'
	||||||||||||||||||||
	target 5' GUGCUCACUCUCUUCUGUCA 3'
151	>mdm-miR156f	MSTRG.121641.36 Chr15 11421495-11433601	score:0	range:1129-1148
	miRNA 3' CACGAGUGAGAGAAGACAGU 5'
	||||||||||||||||||||
	target 5' GUGCUCACUCUCUUCUGUCA 3'
152	>mdm-miR156f	MSTRG.121641.35 Chr15 11421468-11433593	score:0	range:1385-1404
	miRNA 3' CACGAGUGAGAGAAGACAGU 5'
	||||||||||||||||||||
	target 5' GUGCUCACUCUCUUCUGUCA 3'
153	>mdm-miR156f	MSTRG.121641.29 Chr15 11421328-11433637	score:0	range:1522-1541
	miRNA 3' CACGAGUGAGAGAAGACAGU 5'
	||||||||||||||||||||
	target 5' GUGCUCACUCUCUUCUGUCA 3'
154	>mdm-miR156f	MSTRG.121641.34 Chr15 11421468-11433593	score:0	range:1862-1881
	miRNA 3' CACGAGUGAGAGAAGACAGU 5'
	||||||||||||||||||||
	target 5' GUGCUCACUCUCUUCUGUCA 3'
155	>mdm-miR156f	MSTRG.121644.1 Chr15 11397931-11421666	score:0	range:314-333
	miRNA 3' CACGAGUGAGAGAAGACAGU 5'
	||||||||||||||||||||
	target 5' GUGCUCACUCUCUUCUGUCA 3'
156	>mdm-miR156f	MSTRG.121641.28 Chr15 11421313-11433593	score:0	range:5355-5374
	miRNA 3' CACGAGUGAGAGAAGACAGU 5'
	||||||||||||||||||||
	target 5' GUGCUCACUCUCUUCUGUCA 3'
157	>mdm-miR156f	MSTRG.121641.31 Chr15 11421328-11433637	score:0	range:5526-5545
	miRNA 3' CACGAGUGAGAGAAGACAGU 5'
	||||||||||||||||||||
	target 5' GUGCUCACUCUCUUCUGUCA 3'
158	>mdm-miR156f	MSTRG.121641.3 Chr15 11392172-11433593	score:0	range:6047-6066
	miRNA 3' CACGAGUGAGAGAAGACAGU 5'
	||||||||||||||||||||
	target 5' GUGCUCACUCUCUUCUGUCA 3'
159	>mdm-miR156f	MSTRG.121641.32 Chr15 11421328-11433637	score:0	range:6006-6025
	miRNA 3' CACGAGUGAGAGAAGACAGU 5'
	||||||||||||||||||||
	target 5' GUGCUCACUCUCUUCUGUCA 3'
160	>mdm-miR156f	MSTRG.63448.2 Chr08 5220698-5222177	score:0	range:308-327
	miRNA 3' CACGAGUGAGAGAAGACAGU 5'
	||||||||||||||||||||
	target 5' GUGCUCACUCUCUUCUGUCA 3'
161	>mdm-miR156f	MSTRG.121644.8 Chr15 11433222-11434086	score:1	range:253-272
	miRNA 3' CACGAGUGAGAGAAGACAGU 5'
	| ||||||||||||||||||
	target 5' GAGCUCACUCUCUUCUGUCA 3'
162	>mdm-miR156f	MSTRG.121644.3 Chr15 11397969-11398957	score:2	range:208-227
	miRNA 3' CACGAGUGAGAGAAGACAGU 5'
	||||||||||||||||||
	target 5' CAGCUCACUCUCUUCUGUCA 3'
163	>mdm-miR156f	MSTRG.121644.5 Chr15 11417886-11419971	score:2	range:270-289
	miRNA 3' CACGAGUGAGAGAAGACAGU 5'
	||||||||||||||||||
	target 5' CAGCUCACUCUCUUCUGUCA 3'
164	>mdm-miR156f	MSTRG.55073.5 Chr07 6239062-6240209	score:2.5	range:944-962
	miRNA 3' CACGAGUGAGAGAAGACAGU 5'
	||||||||||||||| |||:
	target 5' GUGCUCACUCUCUUC-GUCG 3'
165	>mdm-miR156g	MSTRG.17430.4 Chr02 13244956-13245809	score:0	range:109-128
	miRNA 3' CACGAGUGAGAGAAGACAGU 5'
	||||||||||||||||||||
	target 5' GUGCUCACUCUCUUCUGUCA 3'
166	>mdm-miR156g	MSTRG.121641.37 Chr15 11421520-11433603	score:0	range:1101-1120
	miRNA 3' CACGAGUGAGAGAAGACAGU 5'
	||||||||||||||||||||
	target 5' GUGCUCACUCUCUUCUGUCA 3'
167	>mdm-miR156g	MSTRG.121641.36 Chr15 11421495-11433601	score:0	range:1129-1148
	miRNA 3' CACGAGUGAGAGAAGACAGU 5'
	||||||||||||||||||||
	target 5' GUGCUCACUCUCUUCUGUCA 3'
168	>mdm-miR156g	MSTRG.121641.35 Chr15 11421468-11433593	score:0	range:1385-1404
	miRNA 3' CACGAGUGAGAGAAGACAGU 5'
	||||||||||||||||||||
	target 5' GUGCUCACUCUCUUCUGUCA 3'
169	>mdm-miR156g	MSTRG.121641.29 Chr15 11421328-11433637	score:0	range:1522-1541
	miRNA 3' CACGAGUGAGAGAAGACAGU 5'
	||||||||||||||||||||
	target 5' GUGCUCACUCUCUUCUGUCA 3'
170	>mdm-miR156g	MSTRG.121641.34 Chr15 11421468-11433593	score:0	range:1862-1881
	miRNA 3' CACGAGUGAGAGAAGACAGU 5'
	||||||||||||||||||||
	target 5' GUGCUCACUCUCUUCUGUCA 3'
171	>mdm-miR156g	MSTRG.121644.1 Chr15 11397931-11421666	score:0	range:314-333
	miRNA 3' CACGAGUGAGAGAAGACAGU 5'
	||||||||||||||||||||
	target 5' GUGCUCACUCUCUUCUGUCA 3'
172	>mdm-miR156g	MSTRG.121641.28 Chr15 11421313-11433593	score:0	range:5355-5374
	miRNA 3' CACGAGUGAGAGAAGACAGU 5'
	||||||||||||||||||||
	target 5' GUGCUCACUCUCUUCUGUCA 3'
173	>mdm-miR156g	MSTRG.121641.31 Chr15 11421328-11433637	score:0	range:5526-5545
	miRNA 3' CACGAGUGAGAGAAGACAGU 5'
	||||||||||||||||||||
	target 5' GUGCUCACUCUCUUCUGUCA 3'
174	>mdm-miR156g	MSTRG.121641.3 Chr15 11392172-11433593	score:0	range:6047-6066
	miRNA 3' CACGAGUGAGAGAAGACAGU 5'
	||||||||||||||||||||
	target 5' GUGCUCACUCUCUUCUGUCA 3'
175	>mdm-miR156g	MSTRG.121641.32 Chr15 11421328-11433637	score:0	range:6006-6025
	miRNA 3' CACGAGUGAGAGAAGACAGU 5'
	||||||||||||||||||||
	target 5' GUGCUCACUCUCUUCUGUCA 3'
176	>mdm-miR156g	MSTRG.63448.2 Chr08 5220698-5222177	score:0	range:308-327
	miRNA 3' CACGAGUGAGAGAAGACAGU 5'
	||||||||||||||||||||
	target 5' GUGCUCACUCUCUUCUGUCA 3'
177	>mdm-miR156g	MSTRG.121644.8 Chr15 11433222-11434086	score:1	range:253-272
	miRNA 3' CACGAGUGAGAGAAGACAGU 5'
	| ||||||||||||||||||
	target 5' GAGCUCACUCUCUUCUGUCA 3'
178	>mdm-miR156g	MSTRG.121644.3 Chr15 11397969-11398957	score:2	range:208-227
	miRNA 3' CACGAGUGAGAGAAGACAGU 5'
	||||||||||||||||||
	target 5' CAGCUCACUCUCUUCUGUCA 3'
179	>mdm-miR156g	MSTRG.121644.5 Chr15 11417886-11419971	score:2	range:270-289
	miRNA 3' CACGAGUGAGAGAAGACAGU 5'
	||||||||||||||||||
	target 5' CAGCUCACUCUCUUCUGUCA 3'
180	>mdm-miR156g	MSTRG.55073.5 Chr07 6239062-6240209	score:2.5	range:944-962
	miRNA 3' CACGAGUGAGAGAAGACAGU 5'
	||||||||||||||| |||:
	target 5' GUGCUCACUCUCUUC-GUCG 3'
181	>mdm-miR156h	MSTRG.17430.4 Chr02 13244956-13245809	score:0	range:109-128
	miRNA 3' CACGAGUGAGAGAAGACAGU 5'
	||||||||||||||||||||
	target 5' GUGCUCACUCUCUUCUGUCA 3'
182	>mdm-miR156h	MSTRG.121641.37 Chr15 11421520-11433603	score:0	range:1101-1120
	miRNA 3' CACGAGUGAGAGAAGACAGU 5'
	||||||||||||||||||||
	target 5' GUGCUCACUCUCUUCUGUCA 3'
183	>mdm-miR156h	MSTRG.121641.36 Chr15 11421495-11433601	score:0	range:1129-1148
	miRNA 3' CACGAGUGAGAGAAGACAGU 5'
	||||||||||||||||||||
	target 5' GUGCUCACUCUCUUCUGUCA 3'
184	>mdm-miR156h	MSTRG.121641.35 Chr15 11421468-11433593	score:0	range:1385-1404
	miRNA 3' CACGAGUGAGAGAAGACAGU 5'
	||||||||||||||||||||
	target 5' GUGCUCACUCUCUUCUGUCA 3'
185	>mdm-miR156h	MSTRG.121641.29 Chr15 11421328-11433637	score:0	range:1522-1541
	miRNA 3' CACGAGUGAGAGAAGACAGU 5'
	||||||||||||||||||||
	target 5' GUGCUCACUCUCUUCUGUCA 3'
186	>mdm-miR156h	MSTRG.121641.34 Chr15 11421468-11433593	score:0	range:1862-1881
	miRNA 3' CACGAGUGAGAGAAGACAGU 5'
	||||||||||||||||||||
	target 5' GUGCUCACUCUCUUCUGUCA 3'
187	>mdm-miR156h	MSTRG.121644.1 Chr15 11397931-11421666	score:0	range:314-333
	miRNA 3' CACGAGUGAGAGAAGACAGU 5'
	||||||||||||||||||||
	target 5' GUGCUCACUCUCUUCUGUCA 3'
188	>mdm-miR156h	MSTRG.121641.28 Chr15 11421313-11433593	score:0	range:5355-5374
	miRNA 3' CACGAGUGAGAGAAGACAGU 5'
	||||||||||||||||||||
	target 5' GUGCUCACUCUCUUCUGUCA 3'
189	>mdm-miR156h	MSTRG.121641.31 Chr15 11421328-11433637	score:0	range:5526-5545
	miRNA 3' CACGAGUGAGAGAAGACAGU 5'
	||||||||||||||||||||
	target 5' GUGCUCACUCUCUUCUGUCA 3'
190	>mdm-miR156h	MSTRG.121641.3 Chr15 11392172-11433593	score:0	range:6047-6066
	miRNA 3' CACGAGUGAGAGAAGACAGU 5'
	||||||||||||||||||||
	target 5' GUGCUCACUCUCUUCUGUCA 3'
191	>mdm-miR156h	MSTRG.121641.32 Chr15 11421328-11433637	score:0	range:6006-6025
	miRNA 3' CACGAGUGAGAGAAGACAGU 5'
	||||||||||||||||||||
	target 5' GUGCUCACUCUCUUCUGUCA 3'
192	>mdm-miR156h	MSTRG.63448.2 Chr08 5220698-5222177	score:0	range:308-327
	miRNA 3' CACGAGUGAGAGAAGACAGU 5'
	||||||||||||||||||||
	target 5' GUGCUCACUCUCUUCUGUCA 3'
193	>mdm-miR156h	MSTRG.121644.8 Chr15 11433222-11434086	score:1	range:253-272
	miRNA 3' CACGAGUGAGAGAAGACAGU 5'
	| ||||||||||||||||||
	target 5' GAGCUCACUCUCUUCUGUCA 3'
194	>mdm-miR156h	MSTRG.121644.3 Chr15 11397969-11398957	score:2	range:208-227
	miRNA 3' CACGAGUGAGAGAAGACAGU 5'
	||||||||||||||||||
	target 5' CAGCUCACUCUCUUCUGUCA 3'
195	>mdm-miR156h	MSTRG.121644.5 Chr15 11417886-11419971	score:2	range:270-289
	miRNA 3' CACGAGUGAGAGAAGACAGU 5'
	||||||||||||||||||
	target 5' CAGCUCACUCUCUUCUGUCA 3'
196	>mdm-miR156h	MSTRG.55073.5 Chr07 6239062-6240209	score:2.5	range:944-962
	miRNA 3' CACGAGUGAGAGAAGACAGU 5'
	||||||||||||||| |||:
	target 5' GUGCUCACUCUCUUC-GUCG 3'
197	>mdm-miR156i	MSTRG.17430.4 Chr02 13244956-13245809	score:0	range:109-128
	miRNA 3' CACGAGUGAGAGAAGACAGU 5'
	||||||||||||||||||||
	target 5' GUGCUCACUCUCUUCUGUCA 3'
198	>mdm-miR156i	MSTRG.121641.37 Chr15 11421520-11433603	score:0	range:1101-1120
	miRNA 3' CACGAGUGAGAGAAGACAGU 5'
	||||||||||||||||||||
	target 5' GUGCUCACUCUCUUCUGUCA 3'
199	>mdm-miR156i	MSTRG.121641.36 Chr15 11421495-11433601	score:0	range:1129-1148
	miRNA 3' CACGAGUGAGAGAAGACAGU 5'
	||||||||||||||||||||
	target 5' GUGCUCACUCUCUUCUGUCA 3'
200	>mdm-miR156i	MSTRG.121641.35 Chr15 11421468-11433593	score:0	range:1385-1404
	miRNA 3' CACGAGUGAGAGAAGACAGU 5'
	||||||||||||||||||||
	target 5' GUGCUCACUCUCUUCUGUCA 3'
201	>mdm-miR156i	MSTRG.121641.29 Chr15 11421328-11433637	score:0	range:1522-1541
	miRNA 3' CACGAGUGAGAGAAGACAGU 5'
	||||||||||||||||||||
	target 5' GUGCUCACUCUCUUCUGUCA 3'
202	>mdm-miR156i	MSTRG.121641.34 Chr15 11421468-11433593	score:0	range:1862-1881
	miRNA 3' CACGAGUGAGAGAAGACAGU 5'
	||||||||||||||||||||
	target 5' GUGCUCACUCUCUUCUGUCA 3'
203	>mdm-miR156i	MSTRG.121644.1 Chr15 11397931-11421666	score:0	range:314-333
	miRNA 3' CACGAGUGAGAGAAGACAGU 5'
	||||||||||||||||||||
	target 5' GUGCUCACUCUCUUCUGUCA 3'
204	>mdm-miR156i	MSTRG.121641.28 Chr15 11421313-11433593	score:0	range:5355-5374
	miRNA 3' CACGAGUGAGAGAAGACAGU 5'
	||||||||||||||||||||
	target 5' GUGCUCACUCUCUUCUGUCA 3'
205	>mdm-miR156i	MSTRG.121641.31 Chr15 11421328-11433637	score:0	range:5526-5545
	miRNA 3' CACGAGUGAGAGAAGACAGU 5'
	||||||||||||||||||||
	target 5' GUGCUCACUCUCUUCUGUCA 3'
206	>mdm-miR156i	MSTRG.121641.3 Chr15 11392172-11433593	score:0	range:6047-6066
	miRNA 3' CACGAGUGAGAGAAGACAGU 5'
	||||||||||||||||||||
	target 5' GUGCUCACUCUCUUCUGUCA 3'
207	>mdm-miR156i	MSTRG.121641.32 Chr15 11421328-11433637	score:0	range:6006-6025
	miRNA 3' CACGAGUGAGAGAAGACAGU 5'
	||||||||||||||||||||
	target 5' GUGCUCACUCUCUUCUGUCA 3'
208	>mdm-miR156i	MSTRG.63448.2 Chr08 5220698-5222177	score:0	range:308-327
	miRNA 3' CACGAGUGAGAGAAGACAGU 5'
	||||||||||||||||||||
	target 5' GUGCUCACUCUCUUCUGUCA 3'
209	>mdm-miR156i	MSTRG.121644.8 Chr15 11433222-11434086	score:1	range:253-272
	miRNA 3' CACGAGUGAGAGAAGACAGU 5'
	| ||||||||||||||||||
	target 5' GAGCUCACUCUCUUCUGUCA 3'
210	>mdm-miR156i	MSTRG.121644.3 Chr15 11397969-11398957	score:2	range:208-227
	miRNA 3' CACGAGUGAGAGAAGACAGU 5'
	||||||||||||||||||
	target 5' CAGCUCACUCUCUUCUGUCA 3'
211	>mdm-miR156i	MSTRG.121644.5 Chr15 11417886-11419971	score:2	range:270-289
	miRNA 3' CACGAGUGAGAGAAGACAGU 5'
	||||||||||||||||||
	target 5' CAGCUCACUCUCUUCUGUCA 3'
212	>mdm-miR156i	MSTRG.55073.5 Chr07 6239062-6240209	score:2.5	range:944-962
	miRNA 3' CACGAGUGAGAGAAGACAGU 5'
	||||||||||||||| |||:
	target 5' GUGCUCACUCUCUUC-GUCG 3'
213	>mdm-miR156j	MSTRG.17430.4 Chr02 13244956-13245809	score:0	range:109-128
	miRNA 3' CACGAGUGAGAGAAGACAGU 5'
	||||||||||||||||||||
	target 5' GUGCUCACUCUCUUCUGUCA 3'
214	>mdm-miR156j	MSTRG.121641.37 Chr15 11421520-11433603	score:0	range:1101-1120
	miRNA 3' CACGAGUGAGAGAAGACAGU 5'
	||||||||||||||||||||
	target 5' GUGCUCACUCUCUUCUGUCA 3'
215	>mdm-miR156j	MSTRG.121641.36 Chr15 11421495-11433601	score:0	range:1129-1148
	miRNA 3' CACGAGUGAGAGAAGACAGU 5'
	||||||||||||||||||||
	target 5' GUGCUCACUCUCUUCUGUCA 3'
216	>mdm-miR156j	MSTRG.121641.35 Chr15 11421468-11433593	score:0	range:1385-1404
	miRNA 3' CACGAGUGAGAGAAGACAGU 5'
	||||||||||||||||||||
	target 5' GUGCUCACUCUCUUCUGUCA 3'
217	>mdm-miR156j	MSTRG.121641.29 Chr15 11421328-11433637	score:0	range:1522-1541
	miRNA 3' CACGAGUGAGAGAAGACAGU 5'
	||||||||||||||||||||
	target 5' GUGCUCACUCUCUUCUGUCA 3'
218	>mdm-miR156j	MSTRG.121641.34 Chr15 11421468-11433593	score:0	range:1862-1881
	miRNA 3' CACGAGUGAGAGAAGACAGU 5'
	||||||||||||||||||||
	target 5' GUGCUCACUCUCUUCUGUCA 3'
219	>mdm-miR156j	MSTRG.121644.1 Chr15 11397931-11421666	score:0	range:314-333
	miRNA 3' CACGAGUGAGAGAAGACAGU 5'
	||||||||||||||||||||
	target 5' GUGCUCACUCUCUUCUGUCA 3'
220	>mdm-miR156j	MSTRG.121641.28 Chr15 11421313-11433593	score:0	range:5355-5374
	miRNA 3' CACGAGUGAGAGAAGACAGU 5'
	||||||||||||||||||||
	target 5' GUGCUCACUCUCUUCUGUCA 3'
221	>mdm-miR156j	MSTRG.121641.31 Chr15 11421328-11433637	score:0	range:5526-5545
	miRNA 3' CACGAGUGAGAGAAGACAGU 5'
	||||||||||||||||||||
	target 5' GUGCUCACUCUCUUCUGUCA 3'
222	>mdm-miR156j	MSTRG.121641.3 Chr15 11392172-11433593	score:0	range:6047-6066
	miRNA 3' CACGAGUGAGAGAAGACAGU 5'
	||||||||||||||||||||
	target 5' GUGCUCACUCUCUUCUGUCA 3'
223	>mdm-miR156j	MSTRG.121641.32 Chr15 11421328-11433637	score:0	range:6006-6025
	miRNA 3' CACGAGUGAGAGAAGACAGU 5'
	||||||||||||||||||||
	target 5' GUGCUCACUCUCUUCUGUCA 3'
224	>mdm-miR156j	MSTRG.63448.2 Chr08 5220698-5222177	score:0	range:308-327
	miRNA 3' CACGAGUGAGAGAAGACAGU 5'
	||||||||||||||||||||
	target 5' GUGCUCACUCUCUUCUGUCA 3'
225	>mdm-miR156j	MSTRG.121644.8 Chr15 11433222-11434086	score:1	range:253-272
	miRNA 3' CACGAGUGAGAGAAGACAGU 5'
	| ||||||||||||||||||
	target 5' GAGCUCACUCUCUUCUGUCA 3'
226	>mdm-miR156j	MSTRG.121644.3 Chr15 11397969-11398957	score:2	range:208-227
	miRNA 3' CACGAGUGAGAGAAGACAGU 5'
	||||||||||||||||||
	target 5' CAGCUCACUCUCUUCUGUCA 3'
227	>mdm-miR156j	MSTRG.121644.5 Chr15 11417886-11419971	score:2	range:270-289
	miRNA 3' CACGAGUGAGAGAAGACAGU 5'
	||||||||||||||||||
	target 5' CAGCUCACUCUCUUCUGUCA 3'
228	>mdm-miR156j	MSTRG.55073.5 Chr07 6239062-6240209	score:2.5	range:944-962
	miRNA 3' CACGAGUGAGAGAAGACAGU 5'
	||||||||||||||| |||:
	target 5' GUGCUCACUCUCUUC-GUCG 3'
229	>mdm-miR156k	MSTRG.17430.4 Chr02 13244956-13245809	score:0	range:109-128
	miRNA 3' CACGAGUGAGAGAAGACAGU 5'
	||||||||||||||||||||
	target 5' GUGCUCACUCUCUUCUGUCA 3'
230	>mdm-miR156k	MSTRG.121641.37 Chr15 11421520-11433603	score:0	range:1101-1120
	miRNA 3' CACGAGUGAGAGAAGACAGU 5'
	||||||||||||||||||||
	target 5' GUGCUCACUCUCUUCUGUCA 3'
231	>mdm-miR156k	MSTRG.121641.36 Chr15 11421495-11433601	score:0	range:1129-1148
	miRNA 3' CACGAGUGAGAGAAGACAGU 5'
	||||||||||||||||||||
	target 5' GUGCUCACUCUCUUCUGUCA 3'
232	>mdm-miR156k	MSTRG.121641.35 Chr15 11421468-11433593	score:0	range:1385-1404
	miRNA 3' CACGAGUGAGAGAAGACAGU 5'
	||||||||||||||||||||
	target 5' GUGCUCACUCUCUUCUGUCA 3'
233	>mdm-miR156k	MSTRG.121641.29 Chr15 11421328-11433637	score:0	range:1522-1541
	miRNA 3' CACGAGUGAGAGAAGACAGU 5'
	||||||||||||||||||||
	target 5' GUGCUCACUCUCUUCUGUCA 3'
234	>mdm-miR156k	MSTRG.121641.34 Chr15 11421468-11433593	score:0	range:1862-1881
	miRNA 3' CACGAGUGAGAGAAGACAGU 5'
	||||||||||||||||||||
	target 5' GUGCUCACUCUCUUCUGUCA 3'
235	>mdm-miR156k	MSTRG.121644.1 Chr15 11397931-11421666	score:0	range:314-333
	miRNA 3' CACGAGUGAGAGAAGACAGU 5'
	||||||||||||||||||||
	target 5' GUGCUCACUCUCUUCUGUCA 3'
236	>mdm-miR156k	MSTRG.121641.28 Chr15 11421313-11433593	score:0	range:5355-5374
	miRNA 3' CACGAGUGAGAGAAGACAGU 5'
	||||||||||||||||||||
	target 5' GUGCUCACUCUCUUCUGUCA 3'
237	>mdm-miR156k	MSTRG.121641.31 Chr15 11421328-11433637	score:0	range:5526-5545
	miRNA 3' CACGAGUGAGAGAAGACAGU 5'
	||||||||||||||||||||
	target 5' GUGCUCACUCUCUUCUGUCA 3'
238	>mdm-miR156k	MSTRG.121641.3 Chr15 11392172-11433593	score:0	range:6047-6066
	miRNA 3' CACGAGUGAGAGAAGACAGU 5'
	||||||||||||||||||||
	target 5' GUGCUCACUCUCUUCUGUCA 3'
239	>mdm-miR156k	MSTRG.121641.32 Chr15 11421328-11433637	score:0	range:6006-6025
	miRNA 3' CACGAGUGAGAGAAGACAGU 5'
	||||||||||||||||||||
	target 5' GUGCUCACUCUCUUCUGUCA 3'
240	>mdm-miR156k	MSTRG.63448.2 Chr08 5220698-5222177	score:0	range:308-327
	miRNA 3' CACGAGUGAGAGAAGACAGU 5'
	||||||||||||||||||||
	target 5' GUGCUCACUCUCUUCUGUCA 3'
241	>mdm-miR156k	MSTRG.121644.8 Chr15 11433222-11434086	score:1	range:253-272
	miRNA 3' CACGAGUGAGAGAAGACAGU 5'
	| ||||||||||||||||||
	target 5' GAGCUCACUCUCUUCUGUCA 3'
242	>mdm-miR156k	MSTRG.121644.3 Chr15 11397969-11398957	score:2	range:208-227
	miRNA 3' CACGAGUGAGAGAAGACAGU 5'
	||||||||||||||||||
	target 5' CAGCUCACUCUCUUCUGUCA 3'
243	>mdm-miR156k	MSTRG.121644.5 Chr15 11417886-11419971	score:2	range:270-289
	miRNA 3' CACGAGUGAGAGAAGACAGU 5'
	||||||||||||||||||
	target 5' CAGCUCACUCUCUUCUGUCA 3'
244	>mdm-miR156k	MSTRG.55073.5 Chr07 6239062-6240209	score:2.5	range:944-962
	miRNA 3' CACGAGUGAGAGAAGACAGU 5'
	||||||||||||||| |||:
	target 5' GUGCUCACUCUCUUC-GUCG 3'
245	>mdm-miR156l	MSTRG.17430.4 Chr02 13244956-13245809	score:0	range:109-128
	miRNA 3' CACGAGUGAGAGAAGACAGU 5'
	||||||||||||||||||||
	target 5' GUGCUCACUCUCUUCUGUCA 3'
246	>mdm-miR156l	MSTRG.121641.37 Chr15 11421520-11433603	score:0	range:1101-1120
	miRNA 3' CACGAGUGAGAGAAGACAGU 5'
	||||||||||||||||||||
	target 5' GUGCUCACUCUCUUCUGUCA 3'
247	>mdm-miR156l	MSTRG.121641.36 Chr15 11421495-11433601	score:0	range:1129-1148
	miRNA 3' CACGAGUGAGAGAAGACAGU 5'
	||||||||||||||||||||
	target 5' GUGCUCACUCUCUUCUGUCA 3'
248	>mdm-miR156l	MSTRG.121641.35 Chr15 11421468-11433593	score:0	range:1385-1404
	miRNA 3' CACGAGUGAGAGAAGACAGU 5'
	||||||||||||||||||||
	target 5' GUGCUCACUCUCUUCUGUCA 3'
249	>mdm-miR156l	MSTRG.121641.29 Chr15 11421328-11433637	score:0	range:1522-1541
	miRNA 3' CACGAGUGAGAGAAGACAGU 5'
	||||||||||||||||||||
	target 5' GUGCUCACUCUCUUCUGUCA 3'
250	>mdm-miR156l	MSTRG.121641.34 Chr15 11421468-11433593	score:0	range:1862-1881
	miRNA 3' CACGAGUGAGAGAAGACAGU 5'
	||||||||||||||||||||
	target 5' GUGCUCACUCUCUUCUGUCA 3'
251	>mdm-miR156l	MSTRG.121644.1 Chr15 11397931-11421666	score:0	range:314-333
	miRNA 3' CACGAGUGAGAGAAGACAGU 5'
	||||||||||||||||||||
	target 5' GUGCUCACUCUCUUCUGUCA 3'
252	>mdm-miR156l	MSTRG.121641.28 Chr15 11421313-11433593	score:0	range:5355-5374
	miRNA 3' CACGAGUGAGAGAAGACAGU 5'
	||||||||||||||||||||
	target 5' GUGCUCACUCUCUUCUGUCA 3'
253	>mdm-miR156l	MSTRG.121641.31 Chr15 11421328-11433637	score:0	range:5526-5545
	miRNA 3' CACGAGUGAGAGAAGACAGU 5'
	||||||||||||||||||||
	target 5' GUGCUCACUCUCUUCUGUCA 3'
254	>mdm-miR156l	MSTRG.121641.3 Chr15 11392172-11433593	score:0	range:6047-6066
	miRNA 3' CACGAGUGAGAGAAGACAGU 5'
	||||||||||||||||||||
	target 5' GUGCUCACUCUCUUCUGUCA 3'
255	>mdm-miR156l	MSTRG.121641.32 Chr15 11421328-11433637	score:0	range:6006-6025
	miRNA 3' CACGAGUGAGAGAAGACAGU 5'
	||||||||||||||||||||
	target 5' GUGCUCACUCUCUUCUGUCA 3'
256	>mdm-miR156l	MSTRG.63448.2 Chr08 5220698-5222177	score:0	range:308-327
	miRNA 3' CACGAGUGAGAGAAGACAGU 5'
	||||||||||||||||||||
	target 5' GUGCUCACUCUCUUCUGUCA 3'
257	>mdm-miR156l	MSTRG.121644.8 Chr15 11433222-11434086	score:1	range:253-272
	miRNA 3' CACGAGUGAGAGAAGACAGU 5'
	| ||||||||||||||||||
	target 5' GAGCUCACUCUCUUCUGUCA 3'
258	>mdm-miR156l	MSTRG.121644.3 Chr15 11397969-11398957	score:2	range:208-227
	miRNA 3' CACGAGUGAGAGAAGACAGU 5'
	||||||||||||||||||
	target 5' CAGCUCACUCUCUUCUGUCA 3'
259	>mdm-miR156l	MSTRG.121644.5 Chr15 11417886-11419971	score:2	range:270-289
	miRNA 3' CACGAGUGAGAGAAGACAGU 5'
	||||||||||||||||||
	target 5' CAGCUCACUCUCUUCUGUCA 3'
260	>mdm-miR156l	MSTRG.55073.5 Chr07 6239062-6240209	score:2.5	range:944-962
	miRNA 3' CACGAGUGAGAGAAGACAGU 5'
	||||||||||||||| |||:
	target 5' GUGCUCACUCUCUUC-GUCG 3'
261	>mdm-miR156m	MSTRG.17430.4 Chr02 13244956-13245809	score:0	range:109-128
	miRNA 3' CACGAGUGAGAGAAGACAGU 5'
	||||||||||||||||||||
	target 5' GUGCUCACUCUCUUCUGUCA 3'
262	>mdm-miR156m	MSTRG.121641.37 Chr15 11421520-11433603	score:0	range:1101-1120
	miRNA 3' CACGAGUGAGAGAAGACAGU 5'
	||||||||||||||||||||
	target 5' GUGCUCACUCUCUUCUGUCA 3'
263	>mdm-miR156m	MSTRG.121641.36 Chr15 11421495-11433601	score:0	range:1129-1148
	miRNA 3' CACGAGUGAGAGAAGACAGU 5'
	||||||||||||||||||||
	target 5' GUGCUCACUCUCUUCUGUCA 3'
264	>mdm-miR156m	MSTRG.121641.35 Chr15 11421468-11433593	score:0	range:1385-1404
	miRNA 3' CACGAGUGAGAGAAGACAGU 5'
	||||||||||||||||||||
	target 5' GUGCUCACUCUCUUCUGUCA 3'
265	>mdm-miR156m	MSTRG.121641.29 Chr15 11421328-11433637	score:0	range:1522-1541
	miRNA 3' CACGAGUGAGAGAAGACAGU 5'
	||||||||||||||||||||
	target 5' GUGCUCACUCUCUUCUGUCA 3'
266	>mdm-miR156m	MSTRG.121641.34 Chr15 11421468-11433593	score:0	range:1862-1881
	miRNA 3' CACGAGUGAGAGAAGACAGU 5'
	||||||||||||||||||||
	target 5' GUGCUCACUCUCUUCUGUCA 3'
267	>mdm-miR156m	MSTRG.121644.1 Chr15 11397931-11421666	score:0	range:314-333
	miRNA 3' CACGAGUGAGAGAAGACAGU 5'
	||||||||||||||||||||
	target 5' GUGCUCACUCUCUUCUGUCA 3'
268	>mdm-miR156m	MSTRG.121641.28 Chr15 11421313-11433593	score:0	range:5355-5374
	miRNA 3' CACGAGUGAGAGAAGACAGU 5'
	||||||||||||||||||||
	target 5' GUGCUCACUCUCUUCUGUCA 3'
269	>mdm-miR156m	MSTRG.121641.31 Chr15 11421328-11433637	score:0	range:5526-5545
	miRNA 3' CACGAGUGAGAGAAGACAGU 5'
	||||||||||||||||||||
	target 5' GUGCUCACUCUCUUCUGUCA 3'
270	>mdm-miR156m	MSTRG.121641.3 Chr15 11392172-11433593	score:0	range:6047-6066
	miRNA 3' CACGAGUGAGAGAAGACAGU 5'
	||||||||||||||||||||
	target 5' GUGCUCACUCUCUUCUGUCA 3'
271	>mdm-miR156m	MSTRG.121641.32 Chr15 11421328-11433637	score:0	range:6006-6025
	miRNA 3' CACGAGUGAGAGAAGACAGU 5'
	||||||||||||||||||||
	target 5' GUGCUCACUCUCUUCUGUCA 3'
272	>mdm-miR156m	MSTRG.63448.2 Chr08 5220698-5222177	score:0	range:308-327
	miRNA 3' CACGAGUGAGAGAAGACAGU 5'
	||||||||||||||||||||
	target 5' GUGCUCACUCUCUUCUGUCA 3'
273	>mdm-miR156m	MSTRG.121644.8 Chr15 11433222-11434086	score:1	range:253-272
	miRNA 3' CACGAGUGAGAGAAGACAGU 5'
	| ||||||||||||||||||
	target 5' GAGCUCACUCUCUUCUGUCA 3'
274	>mdm-miR156m	MSTRG.121644.3 Chr15 11397969-11398957	score:2	range:208-227
	miRNA 3' CACGAGUGAGAGAAGACAGU 5'
	||||||||||||||||||
	target 5' CAGCUCACUCUCUUCUGUCA 3'
275	>mdm-miR156m	MSTRG.121644.5 Chr15 11417886-11419971	score:2	range:270-289
	miRNA 3' CACGAGUGAGAGAAGACAGU 5'
	||||||||||||||||||
	target 5' CAGCUCACUCUCUUCUGUCA 3'
276	>mdm-miR156m	MSTRG.55073.5 Chr07 6239062-6240209	score:2.5	range:944-962
	miRNA 3' CACGAGUGAGAGAAGACAGU 5'
	||||||||||||||| |||:
	target 5' GUGCUCACUCUCUUC-GUCG 3'
277	>mdm-miR156n	MSTRG.17430.4 Chr02 13244956-13245809	score:0	range:109-128
	miRNA 3' CACGAGUGAGAGAAGACAGU 5'
	||||||||||||||||||||
	target 5' GUGCUCACUCUCUUCUGUCA 3'
278	>mdm-miR156n	MSTRG.121641.37 Chr15 11421520-11433603	score:0	range:1101-1120
	miRNA 3' CACGAGUGAGAGAAGACAGU 5'
	||||||||||||||||||||
	target 5' GUGCUCACUCUCUUCUGUCA 3'
279	>mdm-miR156n	MSTRG.121641.36 Chr15 11421495-11433601	score:0	range:1129-1148
	miRNA 3' CACGAGUGAGAGAAGACAGU 5'
	||||||||||||||||||||
	target 5' GUGCUCACUCUCUUCUGUCA 3'
280	>mdm-miR156n	MSTRG.121641.35 Chr15 11421468-11433593	score:0	range:1385-1404
	miRNA 3' CACGAGUGAGAGAAGACAGU 5'
	||||||||||||||||||||
	target 5' GUGCUCACUCUCUUCUGUCA 3'
281	>mdm-miR156n	MSTRG.121641.29 Chr15 11421328-11433637	score:0	range:1522-1541
	miRNA 3' CACGAGUGAGAGAAGACAGU 5'
	||||||||||||||||||||
	target 5' GUGCUCACUCUCUUCUGUCA 3'
282	>mdm-miR156n	MSTRG.121641.34 Chr15 11421468-11433593	score:0	range:1862-1881
	miRNA 3' CACGAGUGAGAGAAGACAGU 5'
	||||||||||||||||||||
	target 5' GUGCUCACUCUCUUCUGUCA 3'
283	>mdm-miR156n	MSTRG.121644.1 Chr15 11397931-11421666	score:0	range:314-333
	miRNA 3' CACGAGUGAGAGAAGACAGU 5'
	||||||||||||||||||||
	target 5' GUGCUCACUCUCUUCUGUCA 3'
284	>mdm-miR156n	MSTRG.121641.28 Chr15 11421313-11433593	score:0	range:5355-5374
	miRNA 3' CACGAGUGAGAGAAGACAGU 5'
	||||||||||||||||||||
	target 5' GUGCUCACUCUCUUCUGUCA 3'
285	>mdm-miR156n	MSTRG.121641.31 Chr15 11421328-11433637	score:0	range:5526-5545
	miRNA 3' CACGAGUGAGAGAAGACAGU 5'
	||||||||||||||||||||
	target 5' GUGCUCACUCUCUUCUGUCA 3'
286	>mdm-miR156n	MSTRG.121641.3 Chr15 11392172-11433593	score:0	range:6047-6066
	miRNA 3' CACGAGUGAGAGAAGACAGU 5'
	||||||||||||||||||||
	target 5' GUGCUCACUCUCUUCUGUCA 3'
287	>mdm-miR156n	MSTRG.121641.32 Chr15 11421328-11433637	score:0	range:6006-6025
	miRNA 3' CACGAGUGAGAGAAGACAGU 5'
	||||||||||||||||||||
	target 5' GUGCUCACUCUCUUCUGUCA 3'
288	>mdm-miR156n	MSTRG.63448.2 Chr08 5220698-5222177	score:0	range:308-327
	miRNA 3' CACGAGUGAGAGAAGACAGU 5'
	||||||||||||||||||||
	target 5' GUGCUCACUCUCUUCUGUCA 3'
289	>mdm-miR156n	MSTRG.121644.8 Chr15 11433222-11434086	score:1	range:253-272
	miRNA 3' CACGAGUGAGAGAAGACAGU 5'
	| ||||||||||||||||||
	target 5' GAGCUCACUCUCUUCUGUCA 3'
290	>mdm-miR156n	MSTRG.121644.3 Chr15 11397969-11398957	score:2	range:208-227
	miRNA 3' CACGAGUGAGAGAAGACAGU 5'
	||||||||||||||||||
	target 5' CAGCUCACUCUCUUCUGUCA 3'
291	>mdm-miR156n	MSTRG.121644.5 Chr15 11417886-11419971	score:2	range:270-289
	miRNA 3' CACGAGUGAGAGAAGACAGU 5'
	||||||||||||||||||
	target 5' CAGCUCACUCUCUUCUGUCA 3'
292	>mdm-miR156n	MSTRG.55073.5 Chr07 6239062-6240209	score:2.5	range:944-962
	miRNA 3' CACGAGUGAGAGAAGACAGU 5'
	||||||||||||||| |||:
	target 5' GUGCUCACUCUCUUC-GUCG 3'
293	>mdm-miR156o	MSTRG.17430.4 Chr02 13244956-13245809	score:0	range:109-128
	miRNA 3' CACGAGUGAGAGAAGACAGU 5'
	||||||||||||||||||||
	target 5' GUGCUCACUCUCUUCUGUCA 3'
294	>mdm-miR156o	MSTRG.121641.37 Chr15 11421520-11433603	score:0	range:1101-1120
	miRNA 3' CACGAGUGAGAGAAGACAGU 5'
	||||||||||||||||||||
	target 5' GUGCUCACUCUCUUCUGUCA 3'
295	>mdm-miR156o	MSTRG.121641.36 Chr15 11421495-11433601	score:0	range:1129-1148
	miRNA 3' CACGAGUGAGAGAAGACAGU 5'
	||||||||||||||||||||
	target 5' GUGCUCACUCUCUUCUGUCA 3'
296	>mdm-miR156o	MSTRG.121641.35 Chr15 11421468-11433593	score:0	range:1385-1404
	miRNA 3' CACGAGUGAGAGAAGACAGU 5'
	||||||||||||||||||||
	target 5' GUGCUCACUCUCUUCUGUCA 3'
297	>mdm-miR156o	MSTRG.121641.29 Chr15 11421328-11433637	score:0	range:1522-1541
	miRNA 3' CACGAGUGAGAGAAGACAGU 5'
	||||||||||||||||||||
	target 5' GUGCUCACUCUCUUCUGUCA 3'
298	>mdm-miR156o	MSTRG.121641.34 Chr15 11421468-11433593	score:0	range:1862-1881
	miRNA 3' CACGAGUGAGAGAAGACAGU 5'
	||||||||||||||||||||
	target 5' GUGCUCACUCUCUUCUGUCA 3'
299	>mdm-miR156o	MSTRG.121644.1 Chr15 11397931-11421666	score:0	range:314-333
	miRNA 3' CACGAGUGAGAGAAGACAGU 5'
	||||||||||||||||||||
	target 5' GUGCUCACUCUCUUCUGUCA 3'
300	>mdm-miR156o	MSTRG.121641.28 Chr15 11421313-11433593	score:0	range:5355-5374
	miRNA 3' CACGAGUGAGAGAAGACAGU 5'
	||||||||||||||||||||
	target 5' GUGCUCACUCUCUUCUGUCA 3'
301	>mdm-miR156o	MSTRG.121641.31 Chr15 11421328-11433637	score:0	range:5526-5545
	miRNA 3' CACGAGUGAGAGAAGACAGU 5'
	||||||||||||||||||||
	target 5' GUGCUCACUCUCUUCUGUCA 3'
302	>mdm-miR156o	MSTRG.121641.3 Chr15 11392172-11433593	score:0	range:6047-6066
	miRNA 3' CACGAGUGAGAGAAGACAGU 5'
	||||||||||||||||||||
	target 5' GUGCUCACUCUCUUCUGUCA 3'
303	>mdm-miR156o	MSTRG.121641.32 Chr15 11421328-11433637	score:0	range:6006-6025
	miRNA 3' CACGAGUGAGAGAAGACAGU 5'
	||||||||||||||||||||
	target 5' GUGCUCACUCUCUUCUGUCA 3'
304	>mdm-miR156o	MSTRG.63448.2 Chr08 5220698-5222177	score:0	range:308-327
	miRNA 3' CACGAGUGAGAGAAGACAGU 5'
	||||||||||||||||||||
	target 5' GUGCUCACUCUCUUCUGUCA 3'
305	>mdm-miR156o	MSTRG.121644.8 Chr15 11433222-11434086	score:1	range:253-272
	miRNA 3' CACGAGUGAGAGAAGACAGU 5'
	| ||||||||||||||||||
	target 5' GAGCUCACUCUCUUCUGUCA 3'
306	>mdm-miR156o	MSTRG.121644.3 Chr15 11397969-11398957	score:2	range:208-227
	miRNA 3' CACGAGUGAGAGAAGACAGU 5'
	||||||||||||||||||
	target 5' CAGCUCACUCUCUUCUGUCA 3'
307	>mdm-miR156o	MSTRG.121644.5 Chr15 11417886-11419971	score:2	range:270-289
	miRNA 3' CACGAGUGAGAGAAGACAGU 5'
	||||||||||||||||||
	target 5' CAGCUCACUCUCUUCUGUCA 3'
308	>mdm-miR156o	MSTRG.55073.5 Chr07 6239062-6240209	score:2.5	range:944-962
	miRNA 3' CACGAGUGAGAGAAGACAGU 5'
	||||||||||||||| |||:
	target 5' GUGCUCACUCUCUUC-GUCG 3'
309	>mdm-miR156t	MSTRG.17430.4 Chr02 13244956-13245809	score:1	range:109-129
	miRNA 3' CACGAGAGAGAGAAGACAGUU 5'
	|||||| ||||||||||||||
	target 5' GUGCUCACUCUCUUCUGUCAA 3'
310	>mdm-miR156t	MSTRG.121641.37 Chr15 11421520-11433603	score:1	range:1101-1121
	miRNA 3' CACGAGAGAGAGAAGACAGUU 5'
	|||||| ||||||||||||||
	target 5' GUGCUCACUCUCUUCUGUCAA 3'
311	>mdm-miR156t	MSTRG.121641.36 Chr15 11421495-11433601	score:1	range:1129-1149
	miRNA 3' CACGAGAGAGAGAAGACAGUU 5'
	|||||| ||||||||||||||
	target 5' GUGCUCACUCUCUUCUGUCAA 3'
312	>mdm-miR156t	MSTRG.121641.35 Chr15 11421468-11433593	score:1	range:1385-1405
	miRNA 3' CACGAGAGAGAGAAGACAGUU 5'
	|||||| ||||||||||||||
	target 5' GUGCUCACUCUCUUCUGUCAA 3'
313	>mdm-miR156t	MSTRG.121641.29 Chr15 11421328-11433637	score:1	range:1522-1542
	miRNA 3' CACGAGAGAGAGAAGACAGUU 5'
	|||||| ||||||||||||||
	target 5' GUGCUCACUCUCUUCUGUCAA 3'
314	>mdm-miR156t	MSTRG.121641.34 Chr15 11421468-11433593	score:1	range:1862-1882
	miRNA 3' CACGAGAGAGAGAAGACAGUU 5'
	|||||| ||||||||||||||
	target 5' GUGCUCACUCUCUUCUGUCAA 3'
315	>mdm-miR156t	MSTRG.121644.1 Chr15 11397931-11421666	score:1	range:314-334
	miRNA 3' CACGAGAGAGAGAAGACAGUU 5'
	|||||| ||||||||||||||
	target 5' GUGCUCACUCUCUUCUGUCAA 3'
316	>mdm-miR156t	MSTRG.121641.28 Chr15 11421313-11433593	score:1	range:5355-5375
	miRNA 3' CACGAGAGAGAGAAGACAGUU 5'
	|||||| ||||||||||||||
	target 5' GUGCUCACUCUCUUCUGUCAA 3'
317	>mdm-miR156t	MSTRG.121641.31 Chr15 11421328-11433637	score:1	range:5526-5546
	miRNA 3' CACGAGAGAGAGAAGACAGUU 5'
	|||||| ||||||||||||||
	target 5' GUGCUCACUCUCUUCUGUCAA 3'
318	>mdm-miR156t	MSTRG.121641.3 Chr15 11392172-11433593	score:1	range:6047-6067
	miRNA 3' CACGAGAGAGAGAAGACAGUU 5'
	|||||| ||||||||||||||
	target 5' GUGCUCACUCUCUUCUGUCAA 3'
319	>mdm-miR156t	MSTRG.121641.32 Chr15 11421328-11433637	score:1	range:6006-6026
	miRNA 3' CACGAGAGAGAGAAGACAGUU 5'
	|||||| ||||||||||||||
	target 5' GUGCUCACUCUCUUCUGUCAA 3'
320	>mdm-miR156t	MSTRG.121644.8 Chr15 11433222-11434086	score:2	range:253-273
	miRNA 3' CACGAGAGAGAGAAGACAGUU 5'
	| |||| ||||||||||||||
	target 5' GAGCUCACUCUCUUCUGUCAA 3'
321	>mdm-miR156t	MSTRG.63448.2 Chr08 5220698-5222177	score:2	range:307-327
	miRNA 3' CACGAGAGAGAGAAGACAGUU 5'
	|||||| |||||||||||||
	target 5' GUGCUCACUCUCUUCUGUCAC 3'
322	>mdm-miR156t	MSTRG.121644.3 Chr15 11397969-11398957	score:3	range:208-228
	miRNA 3' CACGAGAGAGAGAAGACAGUU 5'
	|||| ||||||||||||||
	target 5' CAGCUCACUCUCUUCUGUCAA 3'
323	>mdm-miR156t	MSTRG.121644.5 Chr15 11417886-11419971	score:3	range:270-290
	miRNA 3' CACGAGAGAGAGAAGACAGUU 5'
	|||| ||||||||||||||
	target 5' CAGCUCACUCUCUUCUGUCAA 3'
324	>mdm-miR156u	MSTRG.17430.4 Chr02 13244956-13245809	score:1	range:109-129
	miRNA 3' CACGAGAGAGAGAAGACAGUU 5'
	|||||| ||||||||||||||
	target 5' GUGCUCACUCUCUUCUGUCAA 3'
325	>mdm-miR156u	MSTRG.121641.37 Chr15 11421520-11433603	score:1	range:1101-1121
	miRNA 3' CACGAGAGAGAGAAGACAGUU 5'
	|||||| ||||||||||||||
	target 5' GUGCUCACUCUCUUCUGUCAA 3'
326	>mdm-miR156u	MSTRG.121641.36 Chr15 11421495-11433601	score:1	range:1129-1149
	miRNA 3' CACGAGAGAGAGAAGACAGUU 5'
	|||||| ||||||||||||||
	target 5' GUGCUCACUCUCUUCUGUCAA 3'
327	>mdm-miR156u	MSTRG.121641.35 Chr15 11421468-11433593	score:1	range:1385-1405
	miRNA 3' CACGAGAGAGAGAAGACAGUU 5'
	|||||| ||||||||||||||
	target 5' GUGCUCACUCUCUUCUGUCAA 3'
328	>mdm-miR156u	MSTRG.121641.29 Chr15 11421328-11433637	score:1	range:1522-1542
	miRNA 3' CACGAGAGAGAGAAGACAGUU 5'
	|||||| ||||||||||||||
	target 5' GUGCUCACUCUCUUCUGUCAA 3'
329	>mdm-miR156u	MSTRG.121641.34 Chr15 11421468-11433593	score:1	range:1862-1882
	miRNA 3' CACGAGAGAGAGAAGACAGUU 5'
	|||||| ||||||||||||||
	target 5' GUGCUCACUCUCUUCUGUCAA 3'
330	>mdm-miR156u	MSTRG.121644.1 Chr15 11397931-11421666	score:1	range:314-334
	miRNA 3' CACGAGAGAGAGAAGACAGUU 5'
	|||||| ||||||||||||||
	target 5' GUGCUCACUCUCUUCUGUCAA 3'
331	>mdm-miR156u	MSTRG.121641.28 Chr15 11421313-11433593	score:1	range:5355-5375
	miRNA 3' CACGAGAGAGAGAAGACAGUU 5'
	|||||| ||||||||||||||
	target 5' GUGCUCACUCUCUUCUGUCAA 3'
332	>mdm-miR156u	MSTRG.121641.31 Chr15 11421328-11433637	score:1	range:5526-5546
	miRNA 3' CACGAGAGAGAGAAGACAGUU 5'
	|||||| ||||||||||||||
	target 5' GUGCUCACUCUCUUCUGUCAA 3'
333	>mdm-miR156u	MSTRG.121641.3 Chr15 11392172-11433593	score:1	range:6047-6067
	miRNA 3' CACGAGAGAGAGAAGACAGUU 5'
	|||||| ||||||||||||||
	target 5' GUGCUCACUCUCUUCUGUCAA 3'
334	>mdm-miR156u	MSTRG.121641.32 Chr15 11421328-11433637	score:1	range:6006-6026
	miRNA 3' CACGAGAGAGAGAAGACAGUU 5'
	|||||| ||||||||||||||
	target 5' GUGCUCACUCUCUUCUGUCAA 3'
335	>mdm-miR156u	MSTRG.121644.8 Chr15 11433222-11434086	score:2	range:253-273
	miRNA 3' CACGAGAGAGAGAAGACAGUU 5'
	| |||| ||||||||||||||
	target 5' GAGCUCACUCUCUUCUGUCAA 3'
336	>mdm-miR156u	MSTRG.63448.2 Chr08 5220698-5222177	score:2	range:307-327
	miRNA 3' CACGAGAGAGAGAAGACAGUU 5'
	|||||| |||||||||||||
	target 5' GUGCUCACUCUCUUCUGUCAC 3'
337	>mdm-miR156u	MSTRG.121644.3 Chr15 11397969-11398957	score:3	range:208-228
	miRNA 3' CACGAGAGAGAGAAGACAGUU 5'
	|||| ||||||||||||||
	target 5' CAGCUCACUCUCUUCUGUCAA 3'
338	>mdm-miR156u	MSTRG.121644.5 Chr15 11417886-11419971	score:3	range:270-290
	miRNA 3' CACGAGAGAGAGAAGACAGUU 5'
	|||| ||||||||||||||
	target 5' CAGCUCACUCUCUUCUGUCAA 3'
339	>mdm-miR156v	MSTRG.17430.4 Chr02 13244956-13245809	score:1	range:109-129
	miRNA 3' CACGAGAGAGAGAAGACAGUU 5'
	|||||| ||||||||||||||
	target 5' GUGCUCACUCUCUUCUGUCAA 3'
340	>mdm-miR156v	MSTRG.121641.37 Chr15 11421520-11433603	score:1	range:1101-1121
	miRNA 3' CACGAGAGAGAGAAGACAGUU 5'
	|||||| ||||||||||||||
	target 5' GUGCUCACUCUCUUCUGUCAA 3'
341	>mdm-miR156v	MSTRG.121641.36 Chr15 11421495-11433601	score:1	range:1129-1149
	miRNA 3' CACGAGAGAGAGAAGACAGUU 5'
	|||||| ||||||||||||||
	target 5' GUGCUCACUCUCUUCUGUCAA 3'
342	>mdm-miR156v	MSTRG.121641.35 Chr15 11421468-11433593	score:1	range:1385-1405
	miRNA 3' CACGAGAGAGAGAAGACAGUU 5'
	|||||| ||||||||||||||
	target 5' GUGCUCACUCUCUUCUGUCAA 3'
343	>mdm-miR156v	MSTRG.121641.29 Chr15 11421328-11433637	score:1	range:1522-1542
	miRNA 3' CACGAGAGAGAGAAGACAGUU 5'
	|||||| ||||||||||||||
	target 5' GUGCUCACUCUCUUCUGUCAA 3'
344	>mdm-miR156v	MSTRG.121641.34 Chr15 11421468-11433593	score:1	range:1862-1882
	miRNA 3' CACGAGAGAGAGAAGACAGUU 5'
	|||||| ||||||||||||||
	target 5' GUGCUCACUCUCUUCUGUCAA 3'
345	>mdm-miR156v	MSTRG.121644.1 Chr15 11397931-11421666	score:1	range:314-334
	miRNA 3' CACGAGAGAGAGAAGACAGUU 5'
	|||||| ||||||||||||||
	target 5' GUGCUCACUCUCUUCUGUCAA 3'
346	>mdm-miR156v	MSTRG.121641.28 Chr15 11421313-11433593	score:1	range:5355-5375
	miRNA 3' CACGAGAGAGAGAAGACAGUU 5'
	|||||| ||||||||||||||
	target 5' GUGCUCACUCUCUUCUGUCAA 3'
347	>mdm-miR156v	MSTRG.121641.31 Chr15 11421328-11433637	score:1	range:5526-5546
	miRNA 3' CACGAGAGAGAGAAGACAGUU 5'
	|||||| ||||||||||||||
	target 5' GUGCUCACUCUCUUCUGUCAA 3'
348	>mdm-miR156v	MSTRG.121641.3 Chr15 11392172-11433593	score:1	range:6047-6067
	miRNA 3' CACGAGAGAGAGAAGACAGUU 5'
	|||||| ||||||||||||||
	target 5' GUGCUCACUCUCUUCUGUCAA 3'
349	>mdm-miR156v	MSTRG.121641.32 Chr15 11421328-11433637	score:1	range:6006-6026
	miRNA 3' CACGAGAGAGAGAAGACAGUU 5'
	|||||| ||||||||||||||
	target 5' GUGCUCACUCUCUUCUGUCAA 3'
350	>mdm-miR156v	MSTRG.121644.8 Chr15 11433222-11434086	score:2	range:253-273
	miRNA 3' CACGAGAGAGAGAAGACAGUU 5'
	| |||| ||||||||||||||
	target 5' GAGCUCACUCUCUUCUGUCAA 3'
351	>mdm-miR156v	MSTRG.63448.2 Chr08 5220698-5222177	score:2	range:307-327
	miRNA 3' CACGAGAGAGAGAAGACAGUU 5'
	|||||| |||||||||||||
	target 5' GUGCUCACUCUCUUCUGUCAC 3'
352	>mdm-miR156v	MSTRG.121644.3 Chr15 11397969-11398957	score:3	range:208-228
	miRNA 3' CACGAGAGAGAGAAGACAGUU 5'
	|||| ||||||||||||||
	target 5' CAGCUCACUCUCUUCUGUCAA 3'
353	>mdm-miR156v	MSTRG.121644.5 Chr15 11417886-11419971	score:3	range:270-290
	miRNA 3' CACGAGAGAGAGAAGACAGUU 5'
	|||| ||||||||||||||
	target 5' CAGCUCACUCUCUUCUGUCAA 3'
354	>mdm-miR156w	MSTRG.17430.4 Chr02 13244956-13245809	score:1	range:109-129
	miRNA 3' CACGAGAGAGAGAAGACAGUU 5'
	|||||| ||||||||||||||
	target 5' GUGCUCACUCUCUUCUGUCAA 3'
355	>mdm-miR156w	MSTRG.121641.37 Chr15 11421520-11433603	score:1	range:1101-1121
	miRNA 3' CACGAGAGAGAGAAGACAGUU 5'
	|||||| ||||||||||||||
	target 5' GUGCUCACUCUCUUCUGUCAA 3'
356	>mdm-miR156w	MSTRG.121641.36 Chr15 11421495-11433601	score:1	range:1129-1149
	miRNA 3' CACGAGAGAGAGAAGACAGUU 5'
	|||||| ||||||||||||||
	target 5' GUGCUCACUCUCUUCUGUCAA 3'
357	>mdm-miR156w	MSTRG.121641.35 Chr15 11421468-11433593	score:1	range:1385-1405
	miRNA 3' CACGAGAGAGAGAAGACAGUU 5'
	|||||| ||||||||||||||
	target 5' GUGCUCACUCUCUUCUGUCAA 3'
358	>mdm-miR156w	MSTRG.121641.29 Chr15 11421328-11433637	score:1	range:1522-1542
	miRNA 3' CACGAGAGAGAGAAGACAGUU 5'
	|||||| ||||||||||||||
	target 5' GUGCUCACUCUCUUCUGUCAA 3'
359	>mdm-miR156w	MSTRG.121641.34 Chr15 11421468-11433593	score:1	range:1862-1882
	miRNA 3' CACGAGAGAGAGAAGACAGUU 5'
	|||||| ||||||||||||||
	target 5' GUGCUCACUCUCUUCUGUCAA 3'
360	>mdm-miR156w	MSTRG.121644.1 Chr15 11397931-11421666	score:1	range:314-334
	miRNA 3' CACGAGAGAGAGAAGACAGUU 5'
	|||||| ||||||||||||||
	target 5' GUGCUCACUCUCUUCUGUCAA 3'
361	>mdm-miR156w	MSTRG.121641.28 Chr15 11421313-11433593	score:1	range:5355-5375
	miRNA 3' CACGAGAGAGAGAAGACAGUU 5'
	|||||| ||||||||||||||
	target 5' GUGCUCACUCUCUUCUGUCAA 3'
362	>mdm-miR156w	MSTRG.121641.31 Chr15 11421328-11433637	score:1	range:5526-5546
	miRNA 3' CACGAGAGAGAGAAGACAGUU 5'
	|||||| ||||||||||||||
	target 5' GUGCUCACUCUCUUCUGUCAA 3'
363	>mdm-miR156w	MSTRG.121641.3 Chr15 11392172-11433593	score:1	range:6047-6067
	miRNA 3' CACGAGAGAGAGAAGACAGUU 5'
	|||||| ||||||||||||||
	target 5' GUGCUCACUCUCUUCUGUCAA 3'
364	>mdm-miR156w	MSTRG.121641.32 Chr15 11421328-11433637	score:1	range:6006-6026
	miRNA 3' CACGAGAGAGAGAAGACAGUU 5'
	|||||| ||||||||||||||
	target 5' GUGCUCACUCUCUUCUGUCAA 3'
365	>mdm-miR156w	MSTRG.121644.8 Chr15 11433222-11434086	score:2	range:253-273
	miRNA 3' CACGAGAGAGAGAAGACAGUU 5'
	| |||| ||||||||||||||
	target 5' GAGCUCACUCUCUUCUGUCAA 3'
366	>mdm-miR156w	MSTRG.63448.2 Chr08 5220698-5222177	score:2	range:307-327
	miRNA 3' CACGAGAGAGAGAAGACAGUU 5'
	|||||| |||||||||||||
	target 5' GUGCUCACUCUCUUCUGUCAC 3'
367	>mdm-miR156w	MSTRG.121644.3 Chr15 11397969-11398957	score:3	range:208-228
	miRNA 3' CACGAGAGAGAGAAGACAGUU 5'
	|||| ||||||||||||||
	target 5' CAGCUCACUCUCUUCUGUCAA 3'
368	>mdm-miR156w	MSTRG.121644.5 Chr15 11417886-11419971	score:3	range:270-290
	miRNA 3' CACGAGAGAGAGAAGACAGUU 5'
	|||| ||||||||||||||
	target 5' CAGCUCACUCUCUUCUGUCAA 3'
369	>mdm-miR156x	MSTRG.17430.4 Chr02 13244956-13245809	score:3	range:109-128
	miRNA 3' CACGAGAGAUAGAAGACAGU 5'
	|||||| || ||||||||||
	target 5' GUGCUCACUCUCUUCUGUCA 3'
370	>mdm-miR156x	MSTRG.121641.37 Chr15 11421520-11433603	score:3	range:1101-1120
	miRNA 3' CACGAGAGAUAGAAGACAGU 5'
	|||||| || ||||||||||
	target 5' GUGCUCACUCUCUUCUGUCA 3'
371	>mdm-miR156x	MSTRG.121641.36 Chr15 11421495-11433601	score:3	range:1129-1148
	miRNA 3' CACGAGAGAUAGAAGACAGU 5'
	|||||| || ||||||||||
	target 5' GUGCUCACUCUCUUCUGUCA 3'
372	>mdm-miR156x	MSTRG.121641.35 Chr15 11421468-11433593	score:3	range:1385-1404
	miRNA 3' CACGAGAGAUAGAAGACAGU 5'
	|||||| || ||||||||||
	target 5' GUGCUCACUCUCUUCUGUCA 3'
373	>mdm-miR156x	MSTRG.121641.29 Chr15 11421328-11433637	score:3	range:1522-1541
	miRNA 3' CACGAGAGAUAGAAGACAGU 5'
	|||||| || ||||||||||
	target 5' GUGCUCACUCUCUUCUGUCA 3'
374	>mdm-miR156x	MSTRG.121641.34 Chr15 11421468-11433593	score:3	range:1862-1881
	miRNA 3' CACGAGAGAUAGAAGACAGU 5'
	|||||| || ||||||||||
	target 5' GUGCUCACUCUCUUCUGUCA 3'
375	>mdm-miR156x	MSTRG.121644.1 Chr15 11397931-11421666	score:3	range:314-333
	miRNA 3' CACGAGAGAUAGAAGACAGU 5'
	|||||| || ||||||||||
	target 5' GUGCUCACUCUCUUCUGUCA 3'
376	>mdm-miR156x	MSTRG.121641.28 Chr15 11421313-11433593	score:3	range:5355-5374
	miRNA 3' CACGAGAGAUAGAAGACAGU 5'
	|||||| || ||||||||||
	target 5' GUGCUCACUCUCUUCUGUCA 3'
377	>mdm-miR156x	MSTRG.121641.31 Chr15 11421328-11433637	score:3	range:5526-5545
	miRNA 3' CACGAGAGAUAGAAGACAGU 5'
	|||||| || ||||||||||
	target 5' GUGCUCACUCUCUUCUGUCA 3'
378	>mdm-miR156x	MSTRG.121641.3 Chr15 11392172-11433593	score:3	range:6047-6066
	miRNA 3' CACGAGAGAUAGAAGACAGU 5'
	|||||| || ||||||||||
	target 5' GUGCUCACUCUCUUCUGUCA 3'
379	>mdm-miR156x	MSTRG.121641.32 Chr15 11421328-11433637	score:3	range:6006-6025
	miRNA 3' CACGAGAGAUAGAAGACAGU 5'
	|||||| || ||||||||||
	target 5' GUGCUCACUCUCUUCUGUCA 3'
380	>mdm-miR156x	MSTRG.63448.2 Chr08 5220698-5222177	score:3	range:308-327
	miRNA 3' CACGAGAGAUAGAAGACAGU 5'
	|||||| || ||||||||||
	target 5' GUGCUCACUCUCUUCUGUCA 3'
381	>mdm-miR156y	MSTRG.17430.4 Chr02 13244956-13245809	score:3	range:109-128
	miRNA 3' CACGAGAGAUAGAAGACAGU 5'
	|||||| || ||||||||||
	target 5' GUGCUCACUCUCUUCUGUCA 3'
382	>mdm-miR156y	MSTRG.121641.37 Chr15 11421520-11433603	score:3	range:1101-1120
	miRNA 3' CACGAGAGAUAGAAGACAGU 5'
	|||||| || ||||||||||
	target 5' GUGCUCACUCUCUUCUGUCA 3'
383	>mdm-miR156y	MSTRG.121641.36 Chr15 11421495-11433601	score:3	range:1129-1148
	miRNA 3' CACGAGAGAUAGAAGACAGU 5'
	|||||| || ||||||||||
	target 5' GUGCUCACUCUCUUCUGUCA 3'
384	>mdm-miR156y	MSTRG.121641.35 Chr15 11421468-11433593	score:3	range:1385-1404
	miRNA 3' CACGAGAGAUAGAAGACAGU 5'
	|||||| || ||||||||||
	target 5' GUGCUCACUCUCUUCUGUCA 3'
385	>mdm-miR156y	MSTRG.121641.29 Chr15 11421328-11433637	score:3	range:1522-1541
	miRNA 3' CACGAGAGAUAGAAGACAGU 5'
	|||||| || ||||||||||
	target 5' GUGCUCACUCUCUUCUGUCA 3'
386	>mdm-miR156y	MSTRG.121641.34 Chr15 11421468-11433593	score:3	range:1862-1881
	miRNA 3' CACGAGAGAUAGAAGACAGU 5'
	|||||| || ||||||||||
	target 5' GUGCUCACUCUCUUCUGUCA 3'
387	>mdm-miR156y	MSTRG.121644.1 Chr15 11397931-11421666	score:3	range:314-333
	miRNA 3' CACGAGAGAUAGAAGACAGU 5'
	|||||| || ||||||||||
	target 5' GUGCUCACUCUCUUCUGUCA 3'
388	>mdm-miR156y	MSTRG.121641.28 Chr15 11421313-11433593	score:3	range:5355-5374
	miRNA 3' CACGAGAGAUAGAAGACAGU 5'
	|||||| || ||||||||||
	target 5' GUGCUCACUCUCUUCUGUCA 3'
389	>mdm-miR156y	MSTRG.121641.31 Chr15 11421328-11433637	score:3	range:5526-5545
	miRNA 3' CACGAGAGAUAGAAGACAGU 5'
	|||||| || ||||||||||
	target 5' GUGCUCACUCUCUUCUGUCA 3'
390	>mdm-miR156y	MSTRG.121641.3 Chr15 11392172-11433593	score:3	range:6047-6066
	miRNA 3' CACGAGAGAUAGAAGACAGU 5'
	|||||| || ||||||||||
	target 5' GUGCUCACUCUCUUCUGUCA 3'
391	>mdm-miR156y	MSTRG.121641.32 Chr15 11421328-11433637	score:3	range:6006-6025
	miRNA 3' CACGAGAGAUAGAAGACAGU 5'
	|||||| || ||||||||||
	target 5' GUGCUCACUCUCUUCUGUCA 3'
392	>mdm-miR156y	MSTRG.63448.2 Chr08 5220698-5222177	score:3	range:308-327
	miRNA 3' CACGAGAGAUAGAAGACAGU 5'
	|||||| || ||||||||||
	target 5' GUGCUCACUCUCUUCUGUCA 3'
393	>mdm-miR156z	MSTRG.17430.4 Chr02 13244956-13245809	score:3	range:109-128
	miRNA 3' CACGAGAGAUAGAAGACAGU 5'
	|||||| || ||||||||||
	target 5' GUGCUCACUCUCUUCUGUCA 3'
394	>mdm-miR156z	MSTRG.121641.37 Chr15 11421520-11433603	score:3	range:1101-1120
	miRNA 3' CACGAGAGAUAGAAGACAGU 5'
	|||||| || ||||||||||
	target 5' GUGCUCACUCUCUUCUGUCA 3'
395	>mdm-miR156z	MSTRG.121641.36 Chr15 11421495-11433601	score:3	range:1129-1148
	miRNA 3' CACGAGAGAUAGAAGACAGU 5'
	|||||| || ||||||||||
	target 5' GUGCUCACUCUCUUCUGUCA 3'
396	>mdm-miR156z	MSTRG.121641.35 Chr15 11421468-11433593	score:3	range:1385-1404
	miRNA 3' CACGAGAGAUAGAAGACAGU 5'
	|||||| || ||||||||||
	target 5' GUGCUCACUCUCUUCUGUCA 3'
397	>mdm-miR156z	MSTRG.121641.29 Chr15 11421328-11433637	score:3	range:1522-1541
	miRNA 3' CACGAGAGAUAGAAGACAGU 5'
	|||||| || ||||||||||
	target 5' GUGCUCACUCUCUUCUGUCA 3'
398	>mdm-miR156z	MSTRG.121641.34 Chr15 11421468-11433593	score:3	range:1862-1881
	miRNA 3' CACGAGAGAUAGAAGACAGU 5'
	|||||| || ||||||||||
	target 5' GUGCUCACUCUCUUCUGUCA 3'
399	>mdm-miR156z	MSTRG.121644.1 Chr15 11397931-11421666	score:3	range:314-333
	miRNA 3' CACGAGAGAUAGAAGACAGU 5'
	|||||| || ||||||||||
	target 5' GUGCUCACUCUCUUCUGUCA 3'
400	>mdm-miR156z	MSTRG.121641.28 Chr15 11421313-11433593	score:3	range:5355-5374
	miRNA 3' CACGAGAGAUAGAAGACAGU 5'
	|||||| || ||||||||||
	target 5' GUGCUCACUCUCUUCUGUCA 3'
401	>mdm-miR156z	MSTRG.121641.31 Chr15 11421328-11433637	score:3	range:5526-5545
	miRNA 3' CACGAGAGAUAGAAGACAGU 5'
	|||||| || ||||||||||
	target 5' GUGCUCACUCUCUUCUGUCA 3'
402	>mdm-miR156z	MSTRG.121641.3 Chr15 11392172-11433593	score:3	range:6047-6066
	miRNA 3' CACGAGAGAUAGAAGACAGU 5'
	|||||| || ||||||||||
	target 5' GUGCUCACUCUCUUCUGUCA 3'
403	>mdm-miR156z	MSTRG.121641.32 Chr15 11421328-11433637	score:3	range:6006-6025
	miRNA 3' CACGAGAGAUAGAAGACAGU 5'
	|||||| || ||||||||||
	target 5' GUGCUCACUCUCUUCUGUCA 3'
404	>mdm-miR156z	MSTRG.63448.2 Chr08 5220698-5222177	score:3	range:308-327
	miRNA 3' CACGAGAGAUAGAAGACAGU 5'
	|||||| || ||||||||||
	target 5' GUGCUCACUCUCUUCUGUCA 3'
405	>mdm-miR159a	MSTRG.9870.3 Chr01 17994967-17996896	score:3	range:262-281
	miRNA 3' CCUCGAGGGAAGUUAGGUUC 5'
	||||||||||||| |||||
	target 5' GGAGCUCCCUUCACUCCAAU 3'
406	>mdm-miR159a	MSTRG.9870.2 Chr01 17994769-17996809	score:3	range:460-479
	miRNA 3' CCUCGAGGGAAGUUAGGUUC 5'
	||||||||||||| |||||
	target 5' GGAGCUCCCUUCACUCCAAU 3'
407	>mdm-miR159a	MSTRG.29411.6 Chr03 35514183-35514755	score:3	range:368-386
	miRNA 3' CCUCGAGGGAAGUUAGGUUC 5'
	||| ||||||||||||||
	target 5' AGAG-UCCCUUCAAUCCAAU 3'
408	>mdm-miR159a	MSTRG.9870.1 Chr01 17994769-17997424	score:3	range:460-479
	miRNA 3' CCUCGAGGGAAGUUAGGUUC 5'
	||||||||||||| |||||
	target 5' GGAGCUCCCUUCACUCCAAU 3'
409	>mdm-miR159b	MSTRG.9870.3 Chr01 17994967-17996896	score:3	range:262-281
	miRNA 3' CCUCGAGGGAAGUUAGGUUC 5'
	||||||||||||| |||||
	target 5' GGAGCUCCCUUCACUCCAAU 3'
410	>mdm-miR159b	MSTRG.9870.2 Chr01 17994769-17996809	score:3	range:460-479
	miRNA 3' CCUCGAGGGAAGUUAGGUUC 5'
	||||||||||||| |||||
	target 5' GGAGCUCCCUUCACUCCAAU 3'
411	>mdm-miR159b	MSTRG.29411.6 Chr03 35514183-35514755	score:3	range:368-386
	miRNA 3' CCUCGAGGGAAGUUAGGUUC 5'
	||| ||||||||||||||
	target 5' AGAG-UCCCUUCAAUCCAAU 3'
412	>mdm-miR159b	MSTRG.9870.1 Chr01 17994769-17997424	score:3	range:460-479
	miRNA 3' CCUCGAGGGAAGUUAGGUUC 5'
	||||||||||||| |||||
	target 5' GGAGCUCCCUUCACUCCAAU 3'
413	>mdm-miR160a	MSTRG.10845.2 Chr01 22254270-22257738	score:0	range:2312-2332
	miRNA 3' ACCGUAUGUCCCUCGGUCCGU 5'
	|||||||||||||||||||||
	target 5' UGGCAUACAGGGAGCCAGGCA 3'
414	>mdm-miR160a	MSTRG.10845.1 Chr01 22254270-22257859	score:0	range:2653-2673
	miRNA 3' ACCGUAUGUCCCUCGGUCCGU 5'
	|||||||||||||||||||||
	target 5' UGGCAUACAGGGAGCCAGGCA 3'
415	>mdm-miR160b	MSTRG.10845.2 Chr01 22254270-22257738	score:0	range:2312-2332
	miRNA 3' ACCGUAUGUCCCUCGGUCCGU 5'
	|||||||||||||||||||||
	target 5' UGGCAUACAGGGAGCCAGGCA 3'
416	>mdm-miR160b	MSTRG.10845.1 Chr01 22254270-22257859	score:0	range:2653-2673
	miRNA 3' ACCGUAUGUCCCUCGGUCCGU 5'
	|||||||||||||||||||||
	target 5' UGGCAUACAGGGAGCCAGGCA 3'
417	>mdm-miR160c	MSTRG.10845.2 Chr01 22254270-22257738	score:0	range:2312-2332
	miRNA 3' ACCGUAUGUCCCUCGGUCCGU 5'
	|||||||||||||||||||||
	target 5' UGGCAUACAGGGAGCCAGGCA 3'
418	>mdm-miR160c	MSTRG.10845.1 Chr01 22254270-22257859	score:0	range:2653-2673
	miRNA 3' ACCGUAUGUCCCUCGGUCCGU 5'
	|||||||||||||||||||||
	target 5' UGGCAUACAGGGAGCCAGGCA 3'
419	>mdm-miR160d	MSTRG.10845.2 Chr01 22254270-22257738	score:0	range:2312-2332
	miRNA 3' ACCGUAUGUCCCUCGGUCCGU 5'
	|||||||||||||||||||||
	target 5' UGGCAUACAGGGAGCCAGGCA 3'
420	>mdm-miR160d	MSTRG.10845.1 Chr01 22254270-22257859	score:0	range:2653-2673
	miRNA 3' ACCGUAUGUCCCUCGGUCCGU 5'
	|||||||||||||||||||||
	target 5' UGGCAUACAGGGAGCCAGGCA 3'
421	>mdm-miR160e	MSTRG.10845.2 Chr01 22254270-22257738	score:0	range:2312-2332
	miRNA 3' ACCGUAUGUCCCUCGGUCCGU 5'
	|||||||||||||||||||||
	target 5' UGGCAUACAGGGAGCCAGGCA 3'
422	>mdm-miR160e	MSTRG.10845.1 Chr01 22254270-22257859	score:0	range:2653-2673
	miRNA 3' ACCGUAUGUCCCUCGGUCCGU 5'
	|||||||||||||||||||||
	target 5' UGGCAUACAGGGAGCCAGGCA 3'
423	>mdm-miR162a	MSTRG.52860.2 Chr06 34248979-34251655	score:0	range:786-806
	miRNA 3' GACCUACGUCUCCAAAUAGCU 5'
	|||||||||||||||||||||
	target 5' CUGGAUGCAGAGGUUUAUCGA 3'
424	>mdm-miR162a	MSTRG.52860.3 Chr06 34249169-34251641	score:0	range:2005-2025
	miRNA 3' GACCUACGUCUCCAAAUAGCU 5'
	|||||||||||||||||||||
	target 5' CUGGAUGCAGAGGUUUAUCGA 3'
425	>mdm-miR162b	MSTRG.52860.2 Chr06 34248979-34251655	score:0	range:786-806
	miRNA 3' GACCUACGUCUCCAAAUAGCU 5'
	|||||||||||||||||||||
	target 5' CUGGAUGCAGAGGUUUAUCGA 3'
426	>mdm-miR162b	MSTRG.52860.3 Chr06 34249169-34251641	score:0	range:2005-2025
	miRNA 3' GACCUACGUCUCCAAAUAGCU 5'
	|||||||||||||||||||||
	target 5' CUGGAUGCAGAGGUUUAUCGA 3'
427	>mdm-miR164a	MSTRG.142473.1 Chr17 13614971-13615468	score:0	range:175-195
	miRNA 3' CCGUACACGGGACGAAGAGGU 5'
	|||||||||||||||||||||
	target 5' GGCAUGUGCCCUGCUUCUCCA 3'
428	>mdm-miR164a	MSTRG.35007.2 Chr04 25961388-25962340	score:2	range:309-329
	miRNA 3' CCGUACACGGGACGAAGAGGU 5'
	||| ||||||||||||||||
	target 5' UGCACGUGCCCUGCUUCUCCA 3'
429	>mdm-miR164a	MSTRG.35007.3 Chr04 25961477-25965583	score:2	range:220-240
	miRNA 3' CCGUACACGGGACGAAGAGGU 5'
	||| ||||||||||||||||
	target 5' UGCACGUGCCCUGCUUCUCCA 3'
430	>mdm-miR164a	MSTRG.35007.6 Chr04 25961510-25963543	score:2	range:187-207
	miRNA 3' CCGUACACGGGACGAAGAGGU 5'
	||| ||||||||||||||||
	target 5' UGCACGUGCCCUGCUUCUCCA 3'
431	>mdm-miR164a	MSTRG.35007.5 Chr04 25961484-25965491	score:2	range:213-233
	miRNA 3' CCGUACACGGGACGAAGAGGU 5'
	||| ||||||||||||||||
	target 5' UGCACGUGCCCUGCUUCUCCA 3'
432	>mdm-miR164a	MSTRG.35007.4 Chr04 25961477-25965583	score:2	range:220-240
	miRNA 3' CCGUACACGGGACGAAGAGGU 5'
	||| ||||||||||||||||
	target 5' UGCACGUGCCCUGCUUCUCCA 3'
433	>mdm-miR164a	MSTRG.35007.1 Chr04 25961388-25965491	score:2	range:309-329
	miRNA 3' CCGUACACGGGACGAAGAGGU 5'
	||| ||||||||||||||||
	target 5' UGCACGUGCCCUGCUUCUCCA 3'
434	>mdm-miR164b	MSTRG.35007.2 Chr04 25961388-25962340	score:0	range:309-329
	miRNA 3' ACGUGCACGGGACGAAGAGGU 5'
	|||||||||||||||||||||
	target 5' UGCACGUGCCCUGCUUCUCCA 3'
435	>mdm-miR164b	MSTRG.35007.3 Chr04 25961477-25965583	score:0	range:220-240
	miRNA 3' ACGUGCACGGGACGAAGAGGU 5'
	|||||||||||||||||||||
	target 5' UGCACGUGCCCUGCUUCUCCA 3'
436	>mdm-miR164b	MSTRG.35007.6 Chr04 25961510-25963543	score:0	range:187-207
	miRNA 3' ACGUGCACGGGACGAAGAGGU 5'
	|||||||||||||||||||||
	target 5' UGCACGUGCCCUGCUUCUCCA 3'
437	>mdm-miR164b	MSTRG.35007.5 Chr04 25961484-25965491	score:0	range:213-233
	miRNA 3' ACGUGCACGGGACGAAGAGGU 5'
	|||||||||||||||||||||
	target 5' UGCACGUGCCCUGCUUCUCCA 3'
438	>mdm-miR164b	MSTRG.35007.4 Chr04 25961477-25965583	score:0	range:220-240
	miRNA 3' ACGUGCACGGGACGAAGAGGU 5'
	|||||||||||||||||||||
	target 5' UGCACGUGCCCUGCUUCUCCA 3'
439	>mdm-miR164b	MSTRG.35007.1 Chr04 25961388-25965491	score:0	range:309-329
	miRNA 3' ACGUGCACGGGACGAAGAGGU 5'
	|||||||||||||||||||||
	target 5' UGCACGUGCCCUGCUUCUCCA 3'
440	>mdm-miR164b	MSTRG.142473.1 Chr17 13614971-13615468	score:1.5	range:175-195
	miRNA 3' ACGUGCACGGGACGAAGAGGU 5'
	|||:||||||||||||||||
	target 5' GGCAUGUGCCCUGCUUCUCCA 3'
441	>mdm-miR164c	MSTRG.35007.2 Chr04 25961388-25962340	score:0	range:309-329
	miRNA 3' ACGUGCACGGGACGAAGAGGU 5'
	|||||||||||||||||||||
	target 5' UGCACGUGCCCUGCUUCUCCA 3'
442	>mdm-miR164c	MSTRG.35007.3 Chr04 25961477-25965583	score:0	range:220-240
	miRNA 3' ACGUGCACGGGACGAAGAGGU 5'
	|||||||||||||||||||||
	target 5' UGCACGUGCCCUGCUUCUCCA 3'
443	>mdm-miR164c	MSTRG.35007.6 Chr04 25961510-25963543	score:0	range:187-207
	miRNA 3' ACGUGCACGGGACGAAGAGGU 5'
	|||||||||||||||||||||
	target 5' UGCACGUGCCCUGCUUCUCCA 3'
444	>mdm-miR164c	MSTRG.35007.5 Chr04 25961484-25965491	score:0	range:213-233
	miRNA 3' ACGUGCACGGGACGAAGAGGU 5'
	|||||||||||||||||||||
	target 5' UGCACGUGCCCUGCUUCUCCA 3'
445	>mdm-miR164c	MSTRG.35007.4 Chr04 25961477-25965583	score:0	range:220-240
	miRNA 3' ACGUGCACGGGACGAAGAGGU 5'
	|||||||||||||||||||||
	target 5' UGCACGUGCCCUGCUUCUCCA 3'
446	>mdm-miR164c	MSTRG.35007.1 Chr04 25961388-25965491	score:0	range:309-329
	miRNA 3' ACGUGCACGGGACGAAGAGGU 5'
	|||||||||||||||||||||
	target 5' UGCACGUGCCCUGCUUCUCCA 3'
447	>mdm-miR164c	MSTRG.142473.1 Chr17 13614971-13615468	score:1.5	range:175-195
	miRNA 3' ACGUGCACGGGACGAAGAGGU 5'
	|||:||||||||||||||||
	target 5' GGCAUGUGCCCUGCUUCUCCA 3'
448	>mdm-miR164d	MSTRG.35007.2 Chr04 25961388-25962340	score:0	range:309-329
	miRNA 3' ACGUGCACGGGACGAAGAGGU 5'
	|||||||||||||||||||||
	target 5' UGCACGUGCCCUGCUUCUCCA 3'
449	>mdm-miR164d	MSTRG.35007.3 Chr04 25961477-25965583	score:0	range:220-240
	miRNA 3' ACGUGCACGGGACGAAGAGGU 5'
	|||||||||||||||||||||
	target 5' UGCACGUGCCCUGCUUCUCCA 3'
450	>mdm-miR164d	MSTRG.35007.6 Chr04 25961510-25963543	score:0	range:187-207
	miRNA 3' ACGUGCACGGGACGAAGAGGU 5'
	|||||||||||||||||||||
	target 5' UGCACGUGCCCUGCUUCUCCA 3'
451	>mdm-miR164d	MSTRG.35007.5 Chr04 25961484-25965491	score:0	range:213-233
	miRNA 3' ACGUGCACGGGACGAAGAGGU 5'
	|||||||||||||||||||||
	target 5' UGCACGUGCCCUGCUUCUCCA 3'
452	>mdm-miR164d	MSTRG.35007.4 Chr04 25961477-25965583	score:0	range:220-240
	miRNA 3' ACGUGCACGGGACGAAGAGGU 5'
	|||||||||||||||||||||
	target 5' UGCACGUGCCCUGCUUCUCCA 3'
453	>mdm-miR164d	MSTRG.35007.1 Chr04 25961388-25965491	score:0	range:309-329
	miRNA 3' ACGUGCACGGGACGAAGAGGU 5'
	|||||||||||||||||||||
	target 5' UGCACGUGCCCUGCUUCUCCA 3'
454	>mdm-miR164d	MSTRG.142473.1 Chr17 13614971-13615468	score:1.5	range:175-195
	miRNA 3' ACGUGCACGGGACGAAGAGGU 5'
	|||:||||||||||||||||
	target 5' GGCAUGUGCCCUGCUUCUCCA 3'
455	>mdm-miR164e	MSTRG.35007.2 Chr04 25961388-25962340	score:0	range:309-329
	miRNA 3' ACGUGCACGGGACGAAGAGGU 5'
	|||||||||||||||||||||
	target 5' UGCACGUGCCCUGCUUCUCCA 3'
456	>mdm-miR164e	MSTRG.35007.3 Chr04 25961477-25965583	score:0	range:220-240
	miRNA 3' ACGUGCACGGGACGAAGAGGU 5'
	|||||||||||||||||||||
	target 5' UGCACGUGCCCUGCUUCUCCA 3'
457	>mdm-miR164e	MSTRG.35007.6 Chr04 25961510-25963543	score:0	range:187-207
	miRNA 3' ACGUGCACGGGACGAAGAGGU 5'
	|||||||||||||||||||||
	target 5' UGCACGUGCCCUGCUUCUCCA 3'
458	>mdm-miR164e	MSTRG.35007.5 Chr04 25961484-25965491	score:0	range:213-233
	miRNA 3' ACGUGCACGGGACGAAGAGGU 5'
	|||||||||||||||||||||
	target 5' UGCACGUGCCCUGCUUCUCCA 3'
459	>mdm-miR164e	MSTRG.35007.4 Chr04 25961477-25965583	score:0	range:220-240
	miRNA 3' ACGUGCACGGGACGAAGAGGU 5'
	|||||||||||||||||||||
	target 5' UGCACGUGCCCUGCUUCUCCA 3'
460	>mdm-miR164e	MSTRG.35007.1 Chr04 25961388-25965491	score:0	range:309-329
	miRNA 3' ACGUGCACGGGACGAAGAGGU 5'
	|||||||||||||||||||||
	target 5' UGCACGUGCCCUGCUUCUCCA 3'
461	>mdm-miR164e	MSTRG.142473.1 Chr17 13614971-13615468	score:1.5	range:175-195
	miRNA 3' ACGUGCACGGGACGAAGAGGU 5'
	|||:||||||||||||||||
	target 5' GGCAUGUGCCCUGCUUCUCCA 3'
462	>mdm-miR164f	MSTRG.35007.2 Chr04 25961388-25962340	score:0	range:309-329
	miRNA 3' ACGUGCACGGGACGAAGAGGU 5'
	|||||||||||||||||||||
	target 5' UGCACGUGCCCUGCUUCUCCA 3'
463	>mdm-miR164f	MSTRG.35007.3 Chr04 25961477-25965583	score:0	range:220-240
	miRNA 3' ACGUGCACGGGACGAAGAGGU 5'
	|||||||||||||||||||||
	target 5' UGCACGUGCCCUGCUUCUCCA 3'
464	>mdm-miR164f	MSTRG.35007.6 Chr04 25961510-25963543	score:0	range:187-207
	miRNA 3' ACGUGCACGGGACGAAGAGGU 5'
	|||||||||||||||||||||
	target 5' UGCACGUGCCCUGCUUCUCCA 3'
465	>mdm-miR164f	MSTRG.35007.5 Chr04 25961484-25965491	score:0	range:213-233
	miRNA 3' ACGUGCACGGGACGAAGAGGU 5'
	|||||||||||||||||||||
	target 5' UGCACGUGCCCUGCUUCUCCA 3'
466	>mdm-miR164f	MSTRG.35007.4 Chr04 25961477-25965583	score:0	range:220-240
	miRNA 3' ACGUGCACGGGACGAAGAGGU 5'
	|||||||||||||||||||||
	target 5' UGCACGUGCCCUGCUUCUCCA 3'
467	>mdm-miR164f	MSTRG.35007.1 Chr04 25961388-25965491	score:0	range:309-329
	miRNA 3' ACGUGCACGGGACGAAGAGGU 5'
	|||||||||||||||||||||
	target 5' UGCACGUGCCCUGCUUCUCCA 3'
468	>mdm-miR164f	MSTRG.142473.1 Chr17 13614971-13615468	score:1.5	range:175-195
	miRNA 3' ACGUGCACGGGACGAAGAGGU 5'
	|||:||||||||||||||||
	target 5' GGCAUGUGCCCUGCUUCUCCA 3'
469	>mdm-miR166a	MSTRG.42932.1 Chr05 33368130-33370429	score:0	range:171-191
	miRNA 3' CCCCUUACUUCGGACCAGGCU 5'
	|||||||||||||||||||||
	target 5' GGGGAAUGAAGCCUGGUCCGA 3'
470	>mdm-miR166a	MSTRG.42932.4 Chr05 33368243-33370279	score:0	range:58-78
	miRNA 3' CCCCUUACUUCGGACCAGGCU 5'
	|||||||||||||||||||||
	target 5' GGGGAAUGAAGCCUGGUCCGA 3'
471	>mdm-miR166a	MSTRG.50564.2 Chr06 25849565-25852065	score:0	range:516-536
	miRNA 3' CCCCUUACUUCGGACCAGGCU 5'
	|||||||||||||||||||||
	target 5' GGGGAAUGAAGCCUGGUCCGA 3'
472	>mdm-miR166a	MSTRG.57916.2 Chr07 22707606-22711947	score:0	range:447-467
	miRNA 3' CCCCUUACUUCGGACCAGGCU 5'
	|||||||||||||||||||||
	target 5' GGGGAAUGAAGCCUGGUCCGA 3'
473	>mdm-miR166a	MSTRG.57916.4 Chr07 22707631-22711718	score:0	range:422-442
	miRNA 3' CCCCUUACUUCGGACCAGGCU 5'
	|||||||||||||||||||||
	target 5' GGGGAAUGAAGCCUGGUCCGA 3'
474	>mdm-miR166a	MSTRG.57916.5 Chr07 22707644-22712172	score:0	range:409-429
	miRNA 3' CCCCUUACUUCGGACCAGGCU 5'
	|||||||||||||||||||||
	target 5' GGGGAAUGAAGCCUGGUCCGA 3'
475	>mdm-miR166a	MSTRG.57916.3 Chr07 22707622-22712440	score:0	range:431-451
	miRNA 3' CCCCUUACUUCGGACCAGGCU 5'
	|||||||||||||||||||||
	target 5' GGGGAAUGAAGCCUGGUCCGA 3'
476	>mdm-miR166b	MSTRG.42932.1 Chr05 33368130-33370429	score:0	range:171-191
	miRNA 3' CCCCUUACUUCGGACCAGGCU 5'
	|||||||||||||||||||||
	target 5' GGGGAAUGAAGCCUGGUCCGA 3'
477	>mdm-miR166b	MSTRG.42932.4 Chr05 33368243-33370279	score:0	range:58-78
	miRNA 3' CCCCUUACUUCGGACCAGGCU 5'
	|||||||||||||||||||||
	target 5' GGGGAAUGAAGCCUGGUCCGA 3'
478	>mdm-miR166b	MSTRG.50564.2 Chr06 25849565-25852065	score:0	range:516-536
	miRNA 3' CCCCUUACUUCGGACCAGGCU 5'
	|||||||||||||||||||||
	target 5' GGGGAAUGAAGCCUGGUCCGA 3'
479	>mdm-miR166b	MSTRG.57916.2 Chr07 22707606-22711947	score:0	range:447-467
	miRNA 3' CCCCUUACUUCGGACCAGGCU 5'
	|||||||||||||||||||||
	target 5' GGGGAAUGAAGCCUGGUCCGA 3'
480	>mdm-miR166b	MSTRG.57916.4 Chr07 22707631-22711718	score:0	range:422-442
	miRNA 3' CCCCUUACUUCGGACCAGGCU 5'
	|||||||||||||||||||||
	target 5' GGGGAAUGAAGCCUGGUCCGA 3'
481	>mdm-miR166b	MSTRG.57916.5 Chr07 22707644-22712172	score:0	range:409-429
	miRNA 3' CCCCUUACUUCGGACCAGGCU 5'
	|||||||||||||||||||||
	target 5' GGGGAAUGAAGCCUGGUCCGA 3'
482	>mdm-miR166b	MSTRG.57916.3 Chr07 22707622-22712440	score:0	range:431-451
	miRNA 3' CCCCUUACUUCGGACCAGGCU 5'
	|||||||||||||||||||||
	target 5' GGGGAAUGAAGCCUGGUCCGA 3'
483	>mdm-miR166c	MSTRG.42932.1 Chr05 33368130-33370429	score:0	range:171-191
	miRNA 3' CCCCUUACUUCGGACCAGGCU 5'
	|||||||||||||||||||||
	target 5' GGGGAAUGAAGCCUGGUCCGA 3'
484	>mdm-miR166c	MSTRG.42932.4 Chr05 33368243-33370279	score:0	range:58-78
	miRNA 3' CCCCUUACUUCGGACCAGGCU 5'
	|||||||||||||||||||||
	target 5' GGGGAAUGAAGCCUGGUCCGA 3'
485	>mdm-miR166c	MSTRG.50564.2 Chr06 25849565-25852065	score:0	range:516-536
	miRNA 3' CCCCUUACUUCGGACCAGGCU 5'
	|||||||||||||||||||||
	target 5' GGGGAAUGAAGCCUGGUCCGA 3'
486	>mdm-miR166c	MSTRG.57916.2 Chr07 22707606-22711947	score:0	range:447-467
	miRNA 3' CCCCUUACUUCGGACCAGGCU 5'
	|||||||||||||||||||||
	target 5' GGGGAAUGAAGCCUGGUCCGA 3'
487	>mdm-miR166c	MSTRG.57916.4 Chr07 22707631-22711718	score:0	range:422-442
	miRNA 3' CCCCUUACUUCGGACCAGGCU 5'
	|||||||||||||||||||||
	target 5' GGGGAAUGAAGCCUGGUCCGA 3'
488	>mdm-miR166c	MSTRG.57916.5 Chr07 22707644-22712172	score:0	range:409-429
	miRNA 3' CCCCUUACUUCGGACCAGGCU 5'
	|||||||||||||||||||||
	target 5' GGGGAAUGAAGCCUGGUCCGA 3'
489	>mdm-miR166c	MSTRG.57916.3 Chr07 22707622-22712440	score:0	range:431-451
	miRNA 3' CCCCUUACUUCGGACCAGGCU 5'
	|||||||||||||||||||||
	target 5' GGGGAAUGAAGCCUGGUCCGA 3'
490	>mdm-miR166d	MSTRG.42932.1 Chr05 33368130-33370429	score:0	range:171-191
	miRNA 3' CCCCUUACUUCGGACCAGGCU 5'
	|||||||||||||||||||||
	target 5' GGGGAAUGAAGCCUGGUCCGA 3'
491	>mdm-miR166d	MSTRG.42932.4 Chr05 33368243-33370279	score:0	range:58-78
	miRNA 3' CCCCUUACUUCGGACCAGGCU 5'
	|||||||||||||||||||||
	target 5' GGGGAAUGAAGCCUGGUCCGA 3'
492	>mdm-miR166d	MSTRG.50564.2 Chr06 25849565-25852065	score:0	range:516-536
	miRNA 3' CCCCUUACUUCGGACCAGGCU 5'
	|||||||||||||||||||||
	target 5' GGGGAAUGAAGCCUGGUCCGA 3'
493	>mdm-miR166d	MSTRG.57916.2 Chr07 22707606-22711947	score:0	range:447-467
	miRNA 3' CCCCUUACUUCGGACCAGGCU 5'
	|||||||||||||||||||||
	target 5' GGGGAAUGAAGCCUGGUCCGA 3'
494	>mdm-miR166d	MSTRG.57916.4 Chr07 22707631-22711718	score:0	range:422-442
	miRNA 3' CCCCUUACUUCGGACCAGGCU 5'
	|||||||||||||||||||||
	target 5' GGGGAAUGAAGCCUGGUCCGA 3'
495	>mdm-miR166d	MSTRG.57916.5 Chr07 22707644-22712172	score:0	range:409-429
	miRNA 3' CCCCUUACUUCGGACCAGGCU 5'
	|||||||||||||||||||||
	target 5' GGGGAAUGAAGCCUGGUCCGA 3'
496	>mdm-miR166d	MSTRG.57916.3 Chr07 22707622-22712440	score:0	range:431-451
	miRNA 3' CCCCUUACUUCGGACCAGGCU 5'
	|||||||||||||||||||||
	target 5' GGGGAAUGAAGCCUGGUCCGA 3'
497	>mdm-miR166e	MSTRG.42932.1 Chr05 33368130-33370429	score:0	range:171-191
	miRNA 3' CCCCUUACUUCGGACCAGGCU 5'
	|||||||||||||||||||||
	target 5' GGGGAAUGAAGCCUGGUCCGA 3'
498	>mdm-miR166e	MSTRG.42932.4 Chr05 33368243-33370279	score:0	range:58-78
	miRNA 3' CCCCUUACUUCGGACCAGGCU 5'
	|||||||||||||||||||||
	target 5' GGGGAAUGAAGCCUGGUCCGA 3'
499	>mdm-miR166e	MSTRG.50564.2 Chr06 25849565-25852065	score:0	range:516-536
	miRNA 3' CCCCUUACUUCGGACCAGGCU 5'
	|||||||||||||||||||||
	target 5' GGGGAAUGAAGCCUGGUCCGA 3'
500	>mdm-miR166e	MSTRG.57916.2 Chr07 22707606-22711947	score:0	range:447-467
	miRNA 3' CCCCUUACUUCGGACCAGGCU 5'
[truncated: 3,366 more rows]
