# Supplementary material for: Expression Profiles and Characteristics of Apple lncRNAs in Roots, Phloem, Leaves, Flowers, and Fruit
Source: Int J Mol Sci. 2022 May 25;23(11):5931. doi: 10.3390/ijms23115931 (PMC9180697; doi:10.3390/ijms23115931)
Supplement: Supplementary file 1 [file ijms-23-05931-s001.zip › table S11.xlsx]

## Sheet: Table S11-1
Table S11-1 Details of interactions between lncRNAs and miRNAs in all five tissues
No.	Sequence pairs of lncRNAs and miRNAs	LncRNA_ID and location	Score	Range
1	>mdm-miR482a-3p	MSTRG.76051.5 Chr09 32954444-32962720	score:0	range:299-320
	miRNA 3' AUCCUUACCCGCCCGAACCCUU 5'
	||||||||||||||||||||||
	target 5' UAGGAAUGGGCGGGCUUGGGAA 3'
2	>mdm-miR482a-5p	MSTRG.76051.5 Chr09 32954444-32962720	score:0	range:241-262
	miRNA 3' AGAAGGGUUUGUCGGGUAAGGA 5'
	||||||||||||||||||||||
	target 5' UCUUCCCAAACAGCCCAUUCCU 3'
3	>mdm-miR156aa	MSTRG.121644.1 Chr15 11397931-11421666	score:3	range:314-333
	miRNA 3' CACGAGAGAUAGAAGACAGU 5'
	|||||| || ||||||||||
	target 5' GUGCUCACUCUCUUCUGUCA 3'
4	>mdm-miR156aa	MSTRG.121641.28 Chr15 11421313-11433593	score:3	range:5355-5374
	miRNA 3' CACGAGAGAUAGAAGACAGU 5'
	|||||| || ||||||||||
	target 5' GUGCUCACUCUCUUCUGUCA 3'
5	>mdm-miR156aa	MSTRG.121641.3 Chr15 11392172-11433593	score:3	range:6047-6066
	miRNA 3' CACGAGAGAUAGAAGACAGU 5'
	|||||| || ||||||||||
	target 5' GUGCUCACUCUCUUCUGUCA 3'
6	>mdm-miR156ab	MSTRG.121644.1 Chr15 11397931-11421666	score:3	range:314-334
	miRNA 3' CACGAGAGAUAGAAGACAGUU 5'
	|||||| || |||||||||||
	target 5' GUGCUCACUCUCUUCUGUCAA 3'
7	>mdm-miR156ab	MSTRG.121641.28 Chr15 11421313-11433593	score:3	range:5355-5375
	miRNA 3' CACGAGAGAUAGAAGACAGUU 5'
	|||||| || |||||||||||
	target 5' GUGCUCACUCUCUUCUGUCAA 3'
8	>mdm-miR156ab	MSTRG.121641.3 Chr15 11392172-11433593	score:3	range:6047-6067
	miRNA 3' CACGAGAGAUAGAAGACAGUU 5'
	|||||| || |||||||||||
	target 5' GUGCUCACUCUCUUCUGUCAA 3'
9	>mdm-miR156ac	MSTRG.121644.1 Chr15 11397931-11421666	score:3	range:314-334
	miRNA 3' CACGAGAGAUAGAAGACAGUU 5'
	|||||| || |||||||||||
	target 5' GUGCUCACUCUCUUCUGUCAA 3'
10	>mdm-miR156ac	MSTRG.121641.28 Chr15 11421313-11433593	score:3	range:5355-5375
	miRNA 3' CACGAGAGAUAGAAGACAGUU 5'
	|||||| || |||||||||||
	target 5' GUGCUCACUCUCUUCUGUCAA 3'
11	>mdm-miR156ac	MSTRG.121641.3 Chr15 11392172-11433593	score:3	range:6047-6067
	miRNA 3' CACGAGAGAUAGAAGACAGUU 5'
	|||||| || |||||||||||
	target 5' GUGCUCACUCUCUUCUGUCAA 3'
12	>mdm-miR156ad	MSTRG.121644.1 Chr15 11397931-11421666	score:2	range:314-333
	miRNA 3' CACGAGUGAAAGAAGACAGU 5'
	||||||||| ||||||||||
	target 5' GUGCUCACUCUCUUCUGUCA 3'
13	>mdm-miR156ad	MSTRG.121641.28 Chr15 11421313-11433593	score:2	range:5355-5374
	miRNA 3' CACGAGUGAAAGAAGACAGU 5'
	||||||||| ||||||||||
	target 5' GUGCUCACUCUCUUCUGUCA 3'
14	>mdm-miR156ad	MSTRG.121641.3 Chr15 11392172-11433593	score:2	range:6047-6066
	miRNA 3' CACGAGUGAAAGAAGACAGU 5'
	||||||||| ||||||||||
	target 5' GUGCUCACUCUCUUCUGUCA 3'
15	>mdm-miR156ae	MSTRG.121644.1 Chr15 11397931-11421666	score:2	range:314-333
	miRNA 3' CACGAGUGAAAGAAGACAGU 5'
	||||||||| ||||||||||
	target 5' GUGCUCACUCUCUUCUGUCA 3'
16	>mdm-miR156ae	MSTRG.121641.28 Chr15 11421313-11433593	score:2	range:5355-5374
	miRNA 3' CACGAGUGAAAGAAGACAGU 5'
	||||||||| ||||||||||
	target 5' GUGCUCACUCUCUUCUGUCA 3'
17	>mdm-miR156ae	MSTRG.121641.3 Chr15 11392172-11433593	score:2	range:6047-6066
	miRNA 3' CACGAGUGAAAGAAGACAGU 5'
	||||||||| ||||||||||
	target 5' GUGCUCACUCUCUUCUGUCA 3'
18	>mdm-miR156a	MSTRG.121644.1 Chr15 11397931-11421666	score:0	range:314-333
	miRNA 3' CACGAGUGAGAGAAGACAGU 5'
	||||||||||||||||||||
	target 5' GUGCUCACUCUCUUCUGUCA 3'
19	>mdm-miR156a	MSTRG.121641.28 Chr15 11421313-11433593	score:0	range:5355-5374
	miRNA 3' CACGAGUGAGAGAAGACAGU 5'
	||||||||||||||||||||
	target 5' GUGCUCACUCUCUUCUGUCA 3'
20	>mdm-miR156a	MSTRG.121641.3 Chr15 11392172-11433593	score:0	range:6047-6066
	miRNA 3' CACGAGUGAGAGAAGACAGU 5'
	||||||||||||||||||||
	target 5' GUGCUCACUCUCUUCUGUCA 3'
21	>mdm-miR156b	MSTRG.121644.1 Chr15 11397931-11421666	score:0	range:314-333
	miRNA 3' CACGAGUGAGAGAAGACAGU 5'
	||||||||||||||||||||
	target 5' GUGCUCACUCUCUUCUGUCA 3'
22	>mdm-miR156b	MSTRG.121641.28 Chr15 11421313-11433593	score:0	range:5355-5374
	miRNA 3' CACGAGUGAGAGAAGACAGU 5'
	||||||||||||||||||||
	target 5' GUGCUCACUCUCUUCUGUCA 3'
23	>mdm-miR156b	MSTRG.121641.3 Chr15 11392172-11433593	score:0	range:6047-6066
	miRNA 3' CACGAGUGAGAGAAGACAGU 5'
	||||||||||||||||||||
	target 5' GUGCUCACUCUCUUCUGUCA 3'
24	>mdm-miR156c	MSTRG.121644.1 Chr15 11397931-11421666	score:0	range:314-333
	miRNA 3' CACGAGUGAGAGAAGACAGU 5'
	||||||||||||||||||||
	target 5' GUGCUCACUCUCUUCUGUCA 3'
25	>mdm-miR156c	MSTRG.121641.28 Chr15 11421313-11433593	score:0	range:5355-5374
	miRNA 3' CACGAGUGAGAGAAGACAGU 5'
	||||||||||||||||||||
	target 5' GUGCUCACUCUCUUCUGUCA 3'
26	>mdm-miR156c	MSTRG.121641.3 Chr15 11392172-11433593	score:0	range:6047-6066
	miRNA 3' CACGAGUGAGAGAAGACAGU 5'
	||||||||||||||||||||
	target 5' GUGCUCACUCUCUUCUGUCA 3'
27	>mdm-miR156d	MSTRG.121644.1 Chr15 11397931-11421666	score:0	range:314-333
	miRNA 3' CACGAGUGAGAGAAGACAGU 5'
	||||||||||||||||||||
	target 5' GUGCUCACUCUCUUCUGUCA 3'
28	>mdm-miR156d	MSTRG.121641.28 Chr15 11421313-11433593	score:0	range:5355-5374
	miRNA 3' CACGAGUGAGAGAAGACAGU 5'
	||||||||||||||||||||
	target 5' GUGCUCACUCUCUUCUGUCA 3'
29	>mdm-miR156d	MSTRG.121641.3 Chr15 11392172-11433593	score:0	range:6047-6066
	miRNA 3' CACGAGUGAGAGAAGACAGU 5'
	||||||||||||||||||||
	target 5' GUGCUCACUCUCUUCUGUCA 3'
30	>mdm-miR156e	MSTRG.121644.1 Chr15 11397931-11421666	score:0	range:314-333
	miRNA 3' CACGAGUGAGAGAAGACAGU 5'
	||||||||||||||||||||
	target 5' GUGCUCACUCUCUUCUGUCA 3'
31	>mdm-miR156e	MSTRG.121641.28 Chr15 11421313-11433593	score:0	range:5355-5374
	miRNA 3' CACGAGUGAGAGAAGACAGU 5'
	||||||||||||||||||||
	target 5' GUGCUCACUCUCUUCUGUCA 3'
32	>mdm-miR156e	MSTRG.121641.3 Chr15 11392172-11433593	score:0	range:6047-6066
	miRNA 3' CACGAGUGAGAGAAGACAGU 5'
	||||||||||||||||||||
	target 5' GUGCUCACUCUCUUCUGUCA 3'
33	>mdm-miR156f	MSTRG.121644.1 Chr15 11397931-11421666	score:0	range:314-333
	miRNA 3' CACGAGUGAGAGAAGACAGU 5'
	||||||||||||||||||||
	target 5' GUGCUCACUCUCUUCUGUCA 3'
34	>mdm-miR156f	MSTRG.121641.28 Chr15 11421313-11433593	score:0	range:5355-5374
	miRNA 3' CACGAGUGAGAGAAGACAGU 5'
	||||||||||||||||||||
	target 5' GUGCUCACUCUCUUCUGUCA 3'
35	>mdm-miR156f	MSTRG.121641.3 Chr15 11392172-11433593	score:0	range:6047-6066
	miRNA 3' CACGAGUGAGAGAAGACAGU 5'
	||||||||||||||||||||
	target 5' GUGCUCACUCUCUUCUGUCA 3'
36	>mdm-miR156g	MSTRG.121644.1 Chr15 11397931-11421666	score:0	range:314-333
	miRNA 3' CACGAGUGAGAGAAGACAGU 5'
	||||||||||||||||||||
	target 5' GUGCUCACUCUCUUCUGUCA 3'
37	>mdm-miR156g	MSTRG.121641.28 Chr15 11421313-11433593	score:0	range:5355-5374
	miRNA 3' CACGAGUGAGAGAAGACAGU 5'
	||||||||||||||||||||
	target 5' GUGCUCACUCUCUUCUGUCA 3'
38	>mdm-miR156g	MSTRG.121641.3 Chr15 11392172-11433593	score:0	range:6047-6066
	miRNA 3' CACGAGUGAGAGAAGACAGU 5'
	||||||||||||||||||||
	target 5' GUGCUCACUCUCUUCUGUCA 3'
39	>mdm-miR156h	MSTRG.121644.1 Chr15 11397931-11421666	score:0	range:314-333
	miRNA 3' CACGAGUGAGAGAAGACAGU 5'
	||||||||||||||||||||
	target 5' GUGCUCACUCUCUUCUGUCA 3'
40	>mdm-miR156h	MSTRG.121641.28 Chr15 11421313-11433593	score:0	range:5355-5374
	miRNA 3' CACGAGUGAGAGAAGACAGU 5'
	||||||||||||||||||||
	target 5' GUGCUCACUCUCUUCUGUCA 3'
41	>mdm-miR156h	MSTRG.121641.3 Chr15 11392172-11433593	score:0	range:6047-6066
	miRNA 3' CACGAGUGAGAGAAGACAGU 5'
	||||||||||||||||||||
	target 5' GUGCUCACUCUCUUCUGUCA 3'
42	>mdm-miR156i	MSTRG.121644.1 Chr15 11397931-11421666	score:0	range:314-333
	miRNA 3' CACGAGUGAGAGAAGACAGU 5'
	||||||||||||||||||||
	target 5' GUGCUCACUCUCUUCUGUCA 3'
43	>mdm-miR156i	MSTRG.121641.28 Chr15 11421313-11433593	score:0	range:5355-5374
	miRNA 3' CACGAGUGAGAGAAGACAGU 5'
	||||||||||||||||||||
	target 5' GUGCUCACUCUCUUCUGUCA 3'
44	>mdm-miR156i	MSTRG.121641.3 Chr15 11392172-11433593	score:0	range:6047-6066
	miRNA 3' CACGAGUGAGAGAAGACAGU 5'
	||||||||||||||||||||
	target 5' GUGCUCACUCUCUUCUGUCA 3'
45	>mdm-miR156j	MSTRG.121644.1 Chr15 11397931-11421666	score:0	range:314-333
	miRNA 3' CACGAGUGAGAGAAGACAGU 5'
	||||||||||||||||||||
	target 5' GUGCUCACUCUCUUCUGUCA 3'
46	>mdm-miR156j	MSTRG.121641.28 Chr15 11421313-11433593	score:0	range:5355-5374
	miRNA 3' CACGAGUGAGAGAAGACAGU 5'
	||||||||||||||||||||
	target 5' GUGCUCACUCUCUUCUGUCA 3'
47	>mdm-miR156j	MSTRG.121641.3 Chr15 11392172-11433593	score:0	range:6047-6066
	miRNA 3' CACGAGUGAGAGAAGACAGU 5'
	||||||||||||||||||||
	target 5' GUGCUCACUCUCUUCUGUCA 3'
48	>mdm-miR156k	MSTRG.121644.1 Chr15 11397931-11421666	score:0	range:314-333
	miRNA 3' CACGAGUGAGAGAAGACAGU 5'
	||||||||||||||||||||
	target 5' GUGCUCACUCUCUUCUGUCA 3'
49	>mdm-miR156k	MSTRG.121641.28 Chr15 11421313-11433593	score:0	range:5355-5374
	miRNA 3' CACGAGUGAGAGAAGACAGU 5'
	||||||||||||||||||||
	target 5' GUGCUCACUCUCUUCUGUCA 3'
50	>mdm-miR156k	MSTRG.121641.3 Chr15 11392172-11433593	score:0	range:6047-6066
	miRNA 3' CACGAGUGAGAGAAGACAGU 5'
	||||||||||||||||||||
	target 5' GUGCUCACUCUCUUCUGUCA 3'
51	>mdm-miR156l	MSTRG.121644.1 Chr15 11397931-11421666	score:0	range:314-333
	miRNA 3' CACGAGUGAGAGAAGACAGU 5'
	||||||||||||||||||||
	target 5' GUGCUCACUCUCUUCUGUCA 3'
52	>mdm-miR156l	MSTRG.121641.28 Chr15 11421313-11433593	score:0	range:5355-5374
	miRNA 3' CACGAGUGAGAGAAGACAGU 5'
	||||||||||||||||||||
	target 5' GUGCUCACUCUCUUCUGUCA 3'
53	>mdm-miR156l	MSTRG.121641.3 Chr15 11392172-11433593	score:0	range:6047-6066
	miRNA 3' CACGAGUGAGAGAAGACAGU 5'
	||||||||||||||||||||
	target 5' GUGCUCACUCUCUUCUGUCA 3'
54	>mdm-miR156m	MSTRG.121644.1 Chr15 11397931-11421666	score:0	range:314-333
	miRNA 3' CACGAGUGAGAGAAGACAGU 5'
	||||||||||||||||||||
	target 5' GUGCUCACUCUCUUCUGUCA 3'
55	>mdm-miR156m	MSTRG.121641.28 Chr15 11421313-11433593	score:0	range:5355-5374
	miRNA 3' CACGAGUGAGAGAAGACAGU 5'
	||||||||||||||||||||
	target 5' GUGCUCACUCUCUUCUGUCA 3'
56	>mdm-miR156m	MSTRG.121641.3 Chr15 11392172-11433593	score:0	range:6047-6066
	miRNA 3' CACGAGUGAGAGAAGACAGU 5'
	||||||||||||||||||||
	target 5' GUGCUCACUCUCUUCUGUCA 3'
57	>mdm-miR156n	MSTRG.121644.1 Chr15 11397931-11421666	score:0	range:314-333
	miRNA 3' CACGAGUGAGAGAAGACAGU 5'
	||||||||||||||||||||
	target 5' GUGCUCACUCUCUUCUGUCA 3'
58	>mdm-miR156n	MSTRG.121641.28 Chr15 11421313-11433593	score:0	range:5355-5374
	miRNA 3' CACGAGUGAGAGAAGACAGU 5'
	||||||||||||||||||||
	target 5' GUGCUCACUCUCUUCUGUCA 3'
59	>mdm-miR156n	MSTRG.121641.3 Chr15 11392172-11433593	score:0	range:6047-6066
	miRNA 3' CACGAGUGAGAGAAGACAGU 5'
	||||||||||||||||||||
	target 5' GUGCUCACUCUCUUCUGUCA 3'
60	>mdm-miR156o	MSTRG.121644.1 Chr15 11397931-11421666	score:0	range:314-333
	miRNA 3' CACGAGUGAGAGAAGACAGU 5'
	||||||||||||||||||||
	target 5' GUGCUCACUCUCUUCUGUCA 3'
61	>mdm-miR156o	MSTRG.121641.28 Chr15 11421313-11433593	score:0	range:5355-5374
	miRNA 3' CACGAGUGAGAGAAGACAGU 5'
	||||||||||||||||||||
	target 5' GUGCUCACUCUCUUCUGUCA 3'
62	>mdm-miR156o	MSTRG.121641.3 Chr15 11392172-11433593	score:0	range:6047-6066
	miRNA 3' CACGAGUGAGAGAAGACAGU 5'
	||||||||||||||||||||
	target 5' GUGCUCACUCUCUUCUGUCA 3'
63	>mdm-miR156t	MSTRG.121644.1 Chr15 11397931-11421666	score:1	range:314-334
	miRNA 3' CACGAGAGAGAGAAGACAGUU 5'
	|||||| ||||||||||||||
	target 5' GUGCUCACUCUCUUCUGUCAA 3'
64	>mdm-miR156t	MSTRG.121641.28 Chr15 11421313-11433593	score:1	range:5355-5375
	miRNA 3' CACGAGAGAGAGAAGACAGUU 5'
	|||||| ||||||||||||||
	target 5' GUGCUCACUCUCUUCUGUCAA 3'
65	>mdm-miR156t	MSTRG.121641.3 Chr15 11392172-11433593	score:1	range:6047-6067
	miRNA 3' CACGAGAGAGAGAAGACAGUU 5'
	|||||| ||||||||||||||
	target 5' GUGCUCACUCUCUUCUGUCAA 3'
66	>mdm-miR156u	MSTRG.121644.1 Chr15 11397931-11421666	score:1	range:314-334
	miRNA 3' CACGAGAGAGAGAAGACAGUU 5'
	|||||| ||||||||||||||
	target 5' GUGCUCACUCUCUUCUGUCAA 3'
67	>mdm-miR156u	MSTRG.121641.28 Chr15 11421313-11433593	score:1	range:5355-5375
	miRNA 3' CACGAGAGAGAGAAGACAGUU 5'
	|||||| ||||||||||||||
	target 5' GUGCUCACUCUCUUCUGUCAA 3'
68	>mdm-miR156u	MSTRG.121641.3 Chr15 11392172-11433593	score:1	range:6047-6067
	miRNA 3' CACGAGAGAGAGAAGACAGUU 5'
	|||||| ||||||||||||||
	target 5' GUGCUCACUCUCUUCUGUCAA 3'
69	>mdm-miR156v	MSTRG.121644.1 Chr15 11397931-11421666	score:1	range:314-334
	miRNA 3' CACGAGAGAGAGAAGACAGUU 5'
	|||||| ||||||||||||||
	target 5' GUGCUCACUCUCUUCUGUCAA 3'
70	>mdm-miR156v	MSTRG.121641.28 Chr15 11421313-11433593	score:1	range:5355-5375
	miRNA 3' CACGAGAGAGAGAAGACAGUU 5'
	|||||| ||||||||||||||
	target 5' GUGCUCACUCUCUUCUGUCAA 3'
71	>mdm-miR156v	MSTRG.121641.3 Chr15 11392172-11433593	score:1	range:6047-6067
	miRNA 3' CACGAGAGAGAGAAGACAGUU 5'
	|||||| ||||||||||||||
	target 5' GUGCUCACUCUCUUCUGUCAA 3'
72	>mdm-miR156w	MSTRG.121644.1 Chr15 11397931-11421666	score:1	range:314-334
	miRNA 3' CACGAGAGAGAGAAGACAGUU 5'
	|||||| ||||||||||||||
	target 5' GUGCUCACUCUCUUCUGUCAA 3'
73	>mdm-miR156w	MSTRG.121641.28 Chr15 11421313-11433593	score:1	range:5355-5375
	miRNA 3' CACGAGAGAGAGAAGACAGUU 5'
	|||||| ||||||||||||||
	target 5' GUGCUCACUCUCUUCUGUCAA 3'
74	>mdm-miR156w	MSTRG.121641.3 Chr15 11392172-11433593	score:1	range:6047-6067
	miRNA 3' CACGAGAGAGAGAAGACAGUU 5'
	|||||| ||||||||||||||
	target 5' GUGCUCACUCUCUUCUGUCAA 3'
75	>mdm-miR156x	MSTRG.121644.1 Chr15 11397931-11421666	score:3	range:314-333
	miRNA 3' CACGAGAGAUAGAAGACAGU 5'
	|||||| || ||||||||||
	target 5' GUGCUCACUCUCUUCUGUCA 3'
76	>mdm-miR156x	MSTRG.121641.28 Chr15 11421313-11433593	score:3	range:5355-5374
	miRNA 3' CACGAGAGAUAGAAGACAGU 5'
	|||||| || ||||||||||
	target 5' GUGCUCACUCUCUUCUGUCA 3'
77	>mdm-miR156x	MSTRG.121641.3 Chr15 11392172-11433593	score:3	range:6047-6066
	miRNA 3' CACGAGAGAUAGAAGACAGU 5'
	|||||| || ||||||||||
	target 5' GUGCUCACUCUCUUCUGUCA 3'
78	>mdm-miR156y	MSTRG.121644.1 Chr15 11397931-11421666	score:3	range:314-333
	miRNA 3' CACGAGAGAUAGAAGACAGU 5'
	|||||| || ||||||||||
	target 5' GUGCUCACUCUCUUCUGUCA 3'
79	>mdm-miR156y	MSTRG.121641.28 Chr15 11421313-11433593	score:3	range:5355-5374
	miRNA 3' CACGAGAGAUAGAAGACAGU 5'
	|||||| || ||||||||||
	target 5' GUGCUCACUCUCUUCUGUCA 3'
80	>mdm-miR156y	MSTRG.121641.3 Chr15 11392172-11433593	score:3	range:6047-6066
	miRNA 3' CACGAGAGAUAGAAGACAGU 5'
	|||||| || ||||||||||
	target 5' GUGCUCACUCUCUUCUGUCA 3'
81	>mdm-miR156z	MSTRG.121644.1 Chr15 11397931-11421666	score:3	range:314-333
	miRNA 3' CACGAGAGAUAGAAGACAGU 5'
	|||||| || ||||||||||
	target 5' GUGCUCACUCUCUUCUGUCA 3'
82	>mdm-miR156z	MSTRG.121641.28 Chr15 11421313-11433593	score:3	range:5355-5374
	miRNA 3' CACGAGAGAUAGAAGACAGU 5'
	|||||| || ||||||||||
	target 5' GUGCUCACUCUCUUCUGUCA 3'
83	>mdm-miR156z	MSTRG.121641.3 Chr15 11392172-11433593	score:3	range:6047-6066
	miRNA 3' CACGAGAGAUAGAAGACAGU 5'
	|||||| || ||||||||||
	target 5' GUGCUCACUCUCUUCUGUCA 3'
84	>mdm-miR159a	MSTRG.29411.6 Chr03 35514183-35514755	score:3	range:368-386
	miRNA 3' CCUCGAGGGAAGUUAGGUUC 5'
	||| ||||||||||||||
	target 5' AGAG-UCCCUUCAAUCCAAU 3'
85	>mdm-miR159b	MSTRG.29411.6 Chr03 35514183-35514755	score:3	range:368-386
	miRNA 3' CCUCGAGGGAAGUUAGGUUC 5'
	||| ||||||||||||||
	target 5' AGAG-UCCCUUCAAUCCAAU 3'
86	>mdm-miR160a	MSTRG.10845.1 Chr01 22254270-22257859	score:0	range:2653-2673
	miRNA 3' ACCGUAUGUCCCUCGGUCCGU 5'
	|||||||||||||||||||||
	target 5' UGGCAUACAGGGAGCCAGGCA 3'
87	>mdm-miR160b	MSTRG.10845.1 Chr01 22254270-22257859	score:0	range:2653-2673
	miRNA 3' ACCGUAUGUCCCUCGGUCCGU 5'
	|||||||||||||||||||||
	target 5' UGGCAUACAGGGAGCCAGGCA 3'
88	>mdm-miR160c	MSTRG.10845.1 Chr01 22254270-22257859	score:0	range:2653-2673
	miRNA 3' ACCGUAUGUCCCUCGGUCCGU 5'
	|||||||||||||||||||||
	target 5' UGGCAUACAGGGAGCCAGGCA 3'
89	>mdm-miR160d	MSTRG.10845.1 Chr01 22254270-22257859	score:0	range:2653-2673
	miRNA 3' ACCGUAUGUCCCUCGGUCCGU 5'
	|||||||||||||||||||||
	target 5' UGGCAUACAGGGAGCCAGGCA 3'
90	>mdm-miR160e	MSTRG.10845.1 Chr01 22254270-22257859	score:0	range:2653-2673
	miRNA 3' ACCGUAUGUCCCUCGGUCCGU 5'
	|||||||||||||||||||||
	target 5' UGGCAUACAGGGAGCCAGGCA 3'
91	>mdm-miR164a	MSTRG.35007.1 Chr04 25961388-25965491	score:2	range:309-329
	miRNA 3' CCGUACACGGGACGAAGAGGU 5'
	||| ||||||||||||||||
	target 5' UGCACGUGCCCUGCUUCUCCA 3'
92	>mdm-miR164b	MSTRG.35007.1 Chr04 25961388-25965491	score:0	range:309-329
	miRNA 3' ACGUGCACGGGACGAAGAGGU 5'
	|||||||||||||||||||||
	target 5' UGCACGUGCCCUGCUUCUCCA 3'
93	>mdm-miR164c	MSTRG.35007.1 Chr04 25961388-25965491	score:0	range:309-329
	miRNA 3' ACGUGCACGGGACGAAGAGGU 5'
	|||||||||||||||||||||
	target 5' UGCACGUGCCCUGCUUCUCCA 3'
94	>mdm-miR164d	MSTRG.35007.1 Chr04 25961388-25965491	score:0	range:309-329
	miRNA 3' ACGUGCACGGGACGAAGAGGU 5'
	|||||||||||||||||||||
	target 5' UGCACGUGCCCUGCUUCUCCA 3'
95	>mdm-miR164e	MSTRG.35007.1 Chr04 25961388-25965491	score:0	range:309-329
	miRNA 3' ACGUGCACGGGACGAAGAGGU 5'
	|||||||||||||||||||||
	target 5' UGCACGUGCCCUGCUUCUCCA 3'
96	>mdm-miR164f	MSTRG.35007.1 Chr04 25961388-25965491	score:0	range:309-329
	miRNA 3' ACGUGCACGGGACGAAGAGGU 5'
	|||||||||||||||||||||
	target 5' UGCACGUGCCCUGCUUCUCCA 3'
97	>mdm-miR166a	MSTRG.50564.2 Chr06 25849565-25852065	score:0	range:516-536
	miRNA 3' CCCCUUACUUCGGACCAGGCU 5'
	|||||||||||||||||||||
	target 5' GGGGAAUGAAGCCUGGUCCGA 3'
98	>mdm-miR166a	MSTRG.57916.3 Chr07 22707622-22712440	score:0	range:431-451
	miRNA 3' CCCCUUACUUCGGACCAGGCU 5'
	|||||||||||||||||||||
	target 5' GGGGAAUGAAGCCUGGUCCGA 3'
99	>mdm-miR166b	MSTRG.50564.2 Chr06 25849565-25852065	score:0	range:516-536
	miRNA 3' CCCCUUACUUCGGACCAGGCU 5'
	|||||||||||||||||||||
	target 5' GGGGAAUGAAGCCUGGUCCGA 3'
100	>mdm-miR166b	MSTRG.57916.3 Chr07 22707622-22712440	score:0	range:431-451
	miRNA 3' CCCCUUACUUCGGACCAGGCU 5'
	|||||||||||||||||||||
	target 5' GGGGAAUGAAGCCUGGUCCGA 3'
101	>mdm-miR166c	MSTRG.50564.2 Chr06 25849565-25852065	score:0	range:516-536
	miRNA 3' CCCCUUACUUCGGACCAGGCU 5'
	|||||||||||||||||||||
	target 5' GGGGAAUGAAGCCUGGUCCGA 3'
102	>mdm-miR166c	MSTRG.57916.3 Chr07 22707622-22712440	score:0	range:431-451
	miRNA 3' CCCCUUACUUCGGACCAGGCU 5'
	|||||||||||||||||||||
	target 5' GGGGAAUGAAGCCUGGUCCGA 3'
103	>mdm-miR166d	MSTRG.50564.2 Chr06 25849565-25852065	score:0	range:516-536
	miRNA 3' CCCCUUACUUCGGACCAGGCU 5'
	|||||||||||||||||||||
	target 5' GGGGAAUGAAGCCUGGUCCGA 3'
104	>mdm-miR166d	MSTRG.57916.3 Chr07 22707622-22712440	score:0	range:431-451
	miRNA 3' CCCCUUACUUCGGACCAGGCU 5'
	|||||||||||||||||||||
	target 5' GGGGAAUGAAGCCUGGUCCGA 3'
105	>mdm-miR166e	MSTRG.50564.2 Chr06 25849565-25852065	score:0	range:516-536
	miRNA 3' CCCCUUACUUCGGACCAGGCU 5'
	|||||||||||||||||||||
	target 5' GGGGAAUGAAGCCUGGUCCGA 3'
106	>mdm-miR166e	MSTRG.57916.3 Chr07 22707622-22712440	score:0	range:431-451
	miRNA 3' CCCCUUACUUCGGACCAGGCU 5'
	|||||||||||||||||||||
	target 5' GGGGAAUGAAGCCUGGUCCGA 3'
107	>mdm-miR166f	MSTRG.50564.2 Chr06 25849565-25852065	score:0	range:516-536
	miRNA 3' CCCCUUACUUCGGACCAGGCU 5'
	|||||||||||||||||||||
	target 5' GGGGAAUGAAGCCUGGUCCGA 3'
108	>mdm-miR166f	MSTRG.57916.3 Chr07 22707622-22712440	score:0	range:431-451
	miRNA 3' CCCCUUACUUCGGACCAGGCU 5'
	|||||||||||||||||||||
	target 5' GGGGAAUGAAGCCUGGUCCGA 3'
109	>mdm-miR166g	MSTRG.50564.2 Chr06 25849565-25852065	score:0	range:516-536
	miRNA 3' CCCCUUACUUCGGACCAGGCU 5'
	|||||||||||||||||||||
	target 5' GGGGAAUGAAGCCUGGUCCGA 3'
110	>mdm-miR166g	MSTRG.57916.3 Chr07 22707622-22712440	score:0	range:431-451
	miRNA 3' CCCCUUACUUCGGACCAGGCU 5'
	|||||||||||||||||||||
	target 5' GGGGAAUGAAGCCUGGUCCGA 3'
111	>mdm-miR166h	MSTRG.50564.2 Chr06 25849565-25852065	score:0	range:516-536
	miRNA 3' CCCCUUACUUCGGACCAGGCU 5'
	|||||||||||||||||||||
	target 5' GGGGAAUGAAGCCUGGUCCGA 3'
112	>mdm-miR166h	MSTRG.57916.3 Chr07 22707622-22712440	score:0	range:431-451
	miRNA 3' CCCCUUACUUCGGACCAGGCU 5'
	|||||||||||||||||||||
	target 5' GGGGAAUGAAGCCUGGUCCGA 3'
113	>mdm-miR166i	MSTRG.50564.2 Chr06 25849565-25852065	score:0	range:516-536
	miRNA 3' CCCCUUACUUCGGACCAGGCU 5'
	|||||||||||||||||||||
	target 5' GGGGAAUGAAGCCUGGUCCGA 3'
114	>mdm-miR166i	MSTRG.57916.3 Chr07 22707622-22712440	score:0	range:431-451
	miRNA 3' CCCCUUACUUCGGACCAGGCU 5'
	|||||||||||||||||||||
	target 5' GGGGAAUGAAGCCUGGUCCGA 3'
115	>mdm-miR167b	MSTRG.101885.2 Chr12 31272768-31275192	score:0	range:168-188
	miRNA 3' AUCUAGUACGACCGUCGAAGU 5'
	|||||||||||||||||||||
	target 5' UAGAUCAUGCUGGCAGCUUCA 3'
116	>mdm-miR167b	MSTRG.101885.2 Chr12 31272768-31275192	score:3	range:216-235
	miRNA 3' AUCUAGUACGACCGUCGAAGU 5'
	||||||||| |||:|||||||
	target 5' UAGAUCAUG-UGGUAGCUUCA 3'
117	>mdm-miR167c	MSTRG.101885.2 Chr12 31272768-31275192	score:0	range:168-188
	miRNA 3' AUCUAGUACGACCGUCGAAGU 5'
	|||||||||||||||||||||
	target 5' UAGAUCAUGCUGGCAGCUUCA 3'
118	>mdm-miR167c	MSTRG.101885.2 Chr12 31272768-31275192	score:3	range:216-235
	miRNA 3' AUCUAGUACGACCGUCGAAGU 5'
	||||||||| |||:|||||||
	target 5' UAGAUCAUG-UGGUAGCUUCA 3'
119	>mdm-miR167d	MSTRG.101885.2 Chr12 31272768-31275192	score:0	range:168-188
	miRNA 3' AUCUAGUACGACCGUCGAAGU 5'
	|||||||||||||||||||||
	target 5' UAGAUCAUGCUGGCAGCUUCA 3'
120	>mdm-miR167d	MSTRG.101885.2 Chr12 31272768-31275192	score:3	range:216-235
	miRNA 3' AUCUAGUACGACCGUCGAAGU 5'
	||||||||| |||:|||||||
	target 5' UAGAUCAUG-UGGUAGCUUCA 3'
121	>mdm-miR167e	MSTRG.101885.2 Chr12 31272768-31275192	score:0	range:168-188
	miRNA 3' AUCUAGUACGACCGUCGAAGU 5'
	|||||||||||||||||||||
	target 5' UAGAUCAUGCUGGCAGCUUCA 3'
122	>mdm-miR167e	MSTRG.101885.2 Chr12 31272768-31275192	score:3	range:216-235
	miRNA 3' AUCUAGUACGACCGUCGAAGU 5'
	||||||||| |||:|||||||
	target 5' UAGAUCAUG-UGGUAGCUUCA 3'
123	>mdm-miR167f	MSTRG.101885.2 Chr12 31272768-31275192	score:0	range:168-188
	miRNA 3' AUCUAGUACGACCGUCGAAGU 5'
	|||||||||||||||||||||
	target 5' UAGAUCAUGCUGGCAGCUUCA 3'
124	>mdm-miR167f	MSTRG.101885.2 Chr12 31272768-31275192	score:3	range:216-235
	miRNA 3' AUCUAGUACGACCGUCGAAGU 5'
	||||||||| |||:|||||||
	target 5' UAGAUCAUG-UGGUAGCUUCA 3'
125	>mdm-miR167g	MSTRG.101885.2 Chr12 31272768-31275192	score:0	range:168-188
	miRNA 3' AUCUAGUACGACCGUCGAAGU 5'
	|||||||||||||||||||||
	target 5' UAGAUCAUGCUGGCAGCUUCA 3'
126	>mdm-miR167g	MSTRG.101885.2 Chr12 31272768-31275192	score:3	range:216-235
	miRNA 3' AUCUAGUACGACCGUCGAAGU 5'
	||||||||| |||:|||||||
	target 5' UAGAUCAUG-UGGUAGCUUCA 3'
127	>mdm-miR167h	MSTRG.101885.2 Chr12 31272768-31275192	score:1	range:168-189
	miRNA 3' AUUCUAGUACGACCGUCGAAGU 5'
	| ||||||||||||||||||||
	target 5' UUAGAUCAUGCUGGCAGCUUCA 3'
128	>mdm-miR167i	MSTRG.101885.2 Chr12 31272768-31275192	score:1	range:168-189
	miRNA 3' AUUCUAGUACGACCGUCGAAGU 5'
	| ||||||||||||||||||||
	target 5' UUAGAUCAUGCUGGCAGCUUCA 3'
129	>mdm-miR167j	MSTRG.101885.2 Chr12 31272768-31275192	score:1	range:168-189
	miRNA 3' AUUCUAGUACGACCGUCGAAGU 5'
	| ||||||||||||||||||||
	target 5' UUAGAUCAUGCUGGCAGCUUCA 3'
130	>mdm-miR171a	MSTRG.71519.1 Chr09 8183234-8186218	score:0	range:1034-1054
	miRNA 3' CCUCUAUAACUGCGCCGAGUU 5'
	|||||||||||||||||||||
	target 5' GGAGAUAUUGACGCGGCUCAA 3'
131	>mdm-miR171b	MSTRG.71519.1 Chr09 8183234-8186218	score:0	range:1034-1054
	miRNA 3' CCUCUAUAACUGCGCCGAGUU 5'
	|||||||||||||||||||||
	target 5' GGAGAUAUUGACGCGGCUCAA 3'
132	>mdm-miR171c	MSTRG.71519.1 Chr09 8183234-8186218	score:1	range:1037-1057
	miRNA 3' CUAUAACCGCGCCGAGUUAGU 5'
	||||||| |||||||||||||
	target 5' GAUAUUGACGCGGCUCAAUCA 3'
133	>mdm-miR171d	MSTRG.71519.1 Chr09 8183234-8186218	score:1	range:1037-1057
	miRNA 3' CUAUAACCGCGCCGAGUUAGU 5'
	||||||| |||||||||||||
	target 5' GAUAUUGACGCGGCUCAAUCA 3'
134	>mdm-miR171e	MSTRG.71519.1 Chr09 8183234-8186218	score:1	range:1037-1057
	miRNA 3' CUAUAACCGCGCCGAGUUAGU 5'
	||||||| |||||||||||||
	target 5' GAUAUUGACGCGGCUCAAUCA 3'
135	>mdm-miR171g	MSTRG.71519.1 Chr09 8183234-8186218	score:2	range:1037-1057
	miRNA 3' CUAUAACCGUGCCGAGUUAGU 5'
	||||||| |:|||||||||||
	target 5' GAUAUUGACGCGGCUCAAUCA 3'
136	>mdm-miR171h	MSTRG.71519.1 Chr09 8183234-8186218	score:2	range:1037-1057
	miRNA 3' CUAUAACCGUGCCGAGUUAGU 5'
	||||||| |:|||||||||||
	target 5' GAUAUUGACGCGGCUCAAUCA 3'
137	>mdm-miR171i	MSTRG.13519.1 Chr01 31604825-31607880	score:0	range:2437-2457
	miRNA 3' CUCACUAUAACCAAGCCGAGU 5'
	|||||||||||||||||||||
	target 5' GAGUGAUAUUGGUUCGGCUCA 3'
138	>mdm-miR172a	MSTRG.24932.13 Chr03 11702037-11710044	score:0	range:6952-6971
	miRNA 3' ACGUCGUAGUAGUUCUAAGA 5'
	||||||||||||||||||||
	target 5' UGCAGCAUCAUCAAGAUUCU 3'
139	>mdm-miR172a	MSTRG.58353.2 Chr07 24603650-24605732	score:0	range:707-726
	miRNA 3' ACGUCGUAGUAGUUCUAAGA 5'
	||||||||||||||||||||
	target 5' UGCAGCAUCAUCAAGAUUCU 3'
140	>mdm-miR172a	MSTRG.58353.2 Chr07 24603650-24605732	score:1	range:626-645
	miRNA 3' ACGUCGUAGUAGUUCUAAGA 5'
	|||||||||||||||||||
	target 5' UGCAGCAUCAUCAAGAUUCA 3'
141	>mdm-miR172a	MSTRG.24932.13 Chr03 11702037-11710044	score:2	range:7007-7026
	miRNA 3' ACGUCGUAGUAGUUCUAAGA 5'
	||::|||||||||||||||
	target 5' UGUGGCAUCAUCAAGAUUCA 3'
142	>mdm-miR172b	MSTRG.24932.13 Chr03 11702037-11710044	score:0	range:6952-6971
	miRNA 3' ACGUCGUAGUAGUUCUAAGA 5'
	||||||||||||||||||||
	target 5' UGCAGCAUCAUCAAGAUUCU 3'
143	>mdm-miR172b	MSTRG.58353.2 Chr07 24603650-24605732	score:0	range:707-726
	miRNA 3' ACGUCGUAGUAGUUCUAAGA 5'
	||||||||||||||||||||
	target 5' UGCAGCAUCAUCAAGAUUCU 3'
144	>mdm-miR172b	MSTRG.58353.2 Chr07 24603650-24605732	score:1	range:626-645
	miRNA 3' ACGUCGUAGUAGUUCUAAGA 5'
	|||||||||||||||||||
	target 5' UGCAGCAUCAUCAAGAUUCA 3'
145	>mdm-miR172b	MSTRG.24932.13 Chr03 11702037-11710044	score:2	range:7007-7026
	miRNA 3' ACGUCGUAGUAGUUCUAAGA 5'
	||::|||||||||||||||
	target 5' UGUGGCAUCAUCAAGAUUCA 3'
146	>mdm-miR172c	MSTRG.24932.13 Chr03 11702037-11710044	score:0	range:6952-6971
	miRNA 3' ACGUCGUAGUAGUUCUAAGA 5'
	||||||||||||||||||||
	target 5' UGCAGCAUCAUCAAGAUUCU 3'
147	>mdm-miR172c	MSTRG.58353.2 Chr07 24603650-24605732	score:0	range:707-726
	miRNA 3' ACGUCGUAGUAGUUCUAAGA 5'
	||||||||||||||||||||
	target 5' UGCAGCAUCAUCAAGAUUCU 3'
148	>mdm-miR172c	MSTRG.58353.2 Chr07 24603650-24605732	score:1	range:626-645
	miRNA 3' ACGUCGUAGUAGUUCUAAGA 5'
	|||||||||||||||||||
	target 5' UGCAGCAUCAUCAAGAUUCA 3'
149	>mdm-miR172c	MSTRG.24932.13 Chr03 11702037-11710044	score:2	range:7007-7026
	miRNA 3' ACGUCGUAGUAGUUCUAAGA 5'
	||::|||||||||||||||
	target 5' UGUGGCAUCAUCAAGAUUCA 3'
150	>mdm-miR172d	MSTRG.24932.13 Chr03 11702037-11710044	score:0	range:6951-6971
	miRNA 3' UACGUCGUAGUAGUUCUAAGA 5'
	|||||||||||||||||||||
	target 5' AUGCAGCAUCAUCAAGAUUCU 3'
151	>mdm-miR172d	MSTRG.58353.2 Chr07 24603650-24605732	score:0	range:707-727
	miRNA 3' UACGUCGUAGUAGUUCUAAGA 5'
	|||||||||||||||||||||
	target 5' AUGCAGCAUCAUCAAGAUUCU 3'
152	>mdm-miR172d	MSTRG.58353.2 Chr07 24603650-24605732	score:1.5	range:625-645
	miRNA 3' UACGUCGUAGUAGUUCUAAGA 5'
	:|||||||||||||||||||
	target 5' GUGCAGCAUCAUCAAGAUUCA 3'
153	>mdm-miR172d	MSTRG.24932.13 Chr03 11702037-11710044	score:2.5	range:7007-7027
	miRNA 3' UACGUCGUAGUAGUUCUAAGA 5'
	:||::|||||||||||||||
	target 5' GUGUGGCAUCAUCAAGAUUCA 3'
154	>mdm-miR172e	MSTRG.24932.13 Chr03 11702037-11710044	score:0	range:6951-6971
	miRNA 3' UACGUCGUAGUAGUUCUAAGA 5'
	|||||||||||||||||||||
	target 5' AUGCAGCAUCAUCAAGAUUCU 3'
155	>mdm-miR172e	MSTRG.58353.2 Chr07 24603650-24605732	score:0	range:707-727
	miRNA 3' UACGUCGUAGUAGUUCUAAGA 5'
	|||||||||||||||||||||
	target 5' AUGCAGCAUCAUCAAGAUUCU 3'
156	>mdm-miR172e	MSTRG.58353.2 Chr07 24603650-24605732	score:1.5	range:625-645
	miRNA 3' UACGUCGUAGUAGUUCUAAGA 5'
	:|||||||||||||||||||
	target 5' GUGCAGCAUCAUCAAGAUUCA 3'
157	>mdm-miR172e	MSTRG.24932.13 Chr03 11702037-11710044	score:2.5	range:7007-7027
	miRNA 3' UACGUCGUAGUAGUUCUAAGA 5'
	:||::|||||||||||||||
	target 5' GUGUGGCAUCAUCAAGAUUCA 3'
158	>mdm-miR172f	MSTRG.24932.13 Chr03 11702037-11710044	score:0	range:6951-6971
	miRNA 3' UACGUCGUAGUAGUUCUAAGA 5'
	|||||||||||||||||||||
	target 5' AUGCAGCAUCAUCAAGAUUCU 3'
159	>mdm-miR172f	MSTRG.58353.2 Chr07 24603650-24605732	score:0	range:707-727
	miRNA 3' UACGUCGUAGUAGUUCUAAGA 5'
	|||||||||||||||||||||
	target 5' AUGCAGCAUCAUCAAGAUUCU 3'
160	>mdm-miR172f	MSTRG.58353.2 Chr07 24603650-24605732	score:1.5	range:625-645
	miRNA 3' UACGUCGUAGUAGUUCUAAGA 5'
	:|||||||||||||||||||
	target 5' GUGCAGCAUCAUCAAGAUUCA 3'
161	>mdm-miR172f	MSTRG.24932.13 Chr03 11702037-11710044	score:2.5	range:7007-7027
	miRNA 3' UACGUCGUAGUAGUUCUAAGA 5'
	:||::|||||||||||||||
	target 5' GUGUGGCAUCAUCAAGAUUCA 3'
162	>mdm-miR172g	MSTRG.24932.13 Chr03 11702037-11710044	score:0	range:6951-6971
	miRNA 3' UACGUCGUAGUAGUUCUAAGA 5'
	|||||||||||||||||||||
	target 5' AUGCAGCAUCAUCAAGAUUCU 3'
163	>mdm-miR172g	MSTRG.58353.2 Chr07 24603650-24605732	score:0	range:707-727
	miRNA 3' UACGUCGUAGUAGUUCUAAGA 5'
	|||||||||||||||||||||
	target 5' AUGCAGCAUCAUCAAGAUUCU 3'
164	>mdm-miR172g	MSTRG.58353.2 Chr07 24603650-24605732	score:1.5	range:625-645
	miRNA 3' UACGUCGUAGUAGUUCUAAGA 5'
	:|||||||||||||||||||
	target 5' GUGCAGCAUCAUCAAGAUUCA 3'
165	>mdm-miR172g	MSTRG.24932.13 Chr03 11702037-11710044	score:2.5	range:7007-7027
	miRNA 3' UACGUCGUAGUAGUUCUAAGA 5'
	:||::|||||||||||||||
	target 5' GUGUGGCAUCAUCAAGAUUCA 3'
166	>mdm-miR172h	MSTRG.24932.13 Chr03 11702037-11710044	score:0	range:6951-6971
	miRNA 3' UACGUCGUAGUAGUUCUAAGA 5'
	|||||||||||||||||||||
	target 5' AUGCAGCAUCAUCAAGAUUCU 3'
167	>mdm-miR172h	MSTRG.58353.2 Chr07 24603650-24605732	score:0	range:707-727
	miRNA 3' UACGUCGUAGUAGUUCUAAGA 5'
	|||||||||||||||||||||
	target 5' AUGCAGCAUCAUCAAGAUUCU 3'
168	>mdm-miR172h	MSTRG.58353.2 Chr07 24603650-24605732	score:1.5	range:625-645
	miRNA 3' UACGUCGUAGUAGUUCUAAGA 5'
	:|||||||||||||||||||
	target 5' GUGCAGCAUCAUCAAGAUUCA 3'
169	>mdm-miR172h	MSTRG.24932.13 Chr03 11702037-11710044	score:2.5	range:7007-7027
	miRNA 3' UACGUCGUAGUAGUUCUAAGA 5'
	:||::|||||||||||||||
	target 5' GUGUGGCAUCAUCAAGAUUCA 3'
170	>mdm-miR172i	MSTRG.24932.13 Chr03 11702037-11710044	score:0.5	range:6951-6971
	miRNA 3' UACGUCGUAGUAGUUCUAAGG 5'
	||||||||||||||||||||:
	target 5' AUGCAGCAUCAUCAAGAUUCU 3'
171	>mdm-miR172i	MSTRG.58353.2 Chr07 24603650-24605732	score:0.5	range:707-727
	miRNA 3' UACGUCGUAGUAGUUCUAAGG 5'
	||||||||||||||||||||:
	target 5' AUGCAGCAUCAUCAAGAUUCU 3'
172	>mdm-miR172i	MSTRG.58353.2 Chr07 24603650-24605732	score:1.5	range:625-645
	miRNA 3' UACGUCGUAGUAGUUCUAAGG 5'
	:|||||||||||||||||||
	target 5' GUGCAGCAUCAUCAAGAUUCA 3'
173	>mdm-miR172i	MSTRG.24932.13 Chr03 11702037-11710044	score:2.5	range:7007-7027
	miRNA 3' UACGUCGUAGUAGUUCUAAGG 5'
	:||::|||||||||||||||
	target 5' GUGUGGCAUCAUCAAGAUUCA 3'
174	>mdm-miR172j	MSTRG.24932.13 Chr03 11702037-11710044	score:0.5	range:6951-6971
	miRNA 3' UACGUCGUAGUAGUUCUAAGG 5'
	||||||||||||||||||||:
	target 5' AUGCAGCAUCAUCAAGAUUCU 3'
175	>mdm-miR172j	MSTRG.58353.2 Chr07 24603650-24605732	score:0.5	range:707-727
	miRNA 3' UACGUCGUAGUAGUUCUAAGG 5'
	||||||||||||||||||||:
	target 5' AUGCAGCAUCAUCAAGAUUCU 3'
176	>mdm-miR172j	MSTRG.58353.2 Chr07 24603650-24605732	score:1.5	range:625-645
	miRNA 3' UACGUCGUAGUAGUUCUAAGG 5'
	:|||||||||||||||||||
	target 5' GUGCAGCAUCAUCAAGAUUCA 3'
177	>mdm-miR172j	MSTRG.24932.13 Chr03 11702037-11710044	score:2.5	range:7007-7027
	miRNA 3' UACGUCGUAGUAGUUCUAAGG 5'
	:||::|||||||||||||||
	target 5' GUGUGGCAUCAUCAAGAUUCA 3'
178	>mdm-miR172k	MSTRG.24932.13 Chr03 11702037-11710044	score:0.5	range:6951-6971
	miRNA 3' UACGUCGUAGUAGUUCUAAGG 5'
	||||||||||||||||||||:
	target 5' AUGCAGCAUCAUCAAGAUUCU 3'
179	>mdm-miR172k	MSTRG.58353.2 Chr07 24603650-24605732	score:0.5	range:707-727
	miRNA 3' UACGUCGUAGUAGUUCUAAGG 5'
	||||||||||||||||||||:
	target 5' AUGCAGCAUCAUCAAGAUUCU 3'
180	>mdm-miR172k	MSTRG.58353.2 Chr07 24603650-24605732	score:1.5	range:625-645
	miRNA 3' UACGUCGUAGUAGUUCUAAGG 5'
	:|||||||||||||||||||
	target 5' GUGCAGCAUCAUCAAGAUUCA 3'
181	>mdm-miR172k	MSTRG.24932.13 Chr03 11702037-11710044	score:2.5	range:7007-7027
	miRNA 3' UACGUCGUAGUAGUUCUAAGG 5'
	:||::|||||||||||||||
	target 5' GUGUGGCAUCAUCAAGAUUCA 3'
182	>mdm-miR172l	MSTRG.24932.13 Chr03 11702037-11710044	score:1.5	range:6951-6971
	miRNA 3' GACGUCGUAGUAGUUCUAAGG 5'
	|||||||||||||||||||:
	target 5' AUGCAGCAUCAUCAAGAUUCU 3'
183	>mdm-miR172l	MSTRG.58353.2 Chr07 24603650-24605732	score:1.5	range:707-727
	miRNA 3' GACGUCGUAGUAGUUCUAAGG 5'
	|||||||||||||||||||:
	target 5' AUGCAGCAUCAUCAAGAUUCU 3'
184	>mdm-miR172l	MSTRG.58353.2 Chr07 24603650-24605732	score:2	range:625-645
	miRNA 3' GACGUCGUAGUAGUUCUAAGG 5'
	|||||||||||||||||||
	target 5' GUGCAGCAUCAUCAAGAUUCA 3'
185	>mdm-miR172l	MSTRG.24932.13 Chr03 11702037-11710044	score:3	range:7007-7027
	miRNA 3' GACGUCGUAGUAGUUCUAAGG 5'
	||::|||||||||||||||
	target 5' GUGUGGCAUCAUCAAGAUUCA 3'
186	>mdm-miR172m	MSTRG.24932.13 Chr03 11702037-11710044	score:1	range:6951-6971
	miRNA 3' GACGUCGUAGUAGUUCUAAGA 5'
	||||||||||||||||||||
	target 5' AUGCAGCAUCAUCAAGAUUCU 3'
187	>mdm-miR172m	MSTRG.58353.2 Chr07 24603650-24605732	score:1	range:707-727
	miRNA 3' GACGUCGUAGUAGUUCUAAGA 5'
	||||||||||||||||||||
	target 5' AUGCAGCAUCAUCAAGAUUCU 3'
188	>mdm-miR172m	MSTRG.58353.2 Chr07 24603650-24605732	score:2	range:625-645
	miRNA 3' GACGUCGUAGUAGUUCUAAGA 5'
	|||||||||||||||||||
	target 5' GUGCAGCAUCAUCAAGAUUCA 3'
189	>mdm-miR172m	MSTRG.24932.13 Chr03 11702037-11710044	score:3	range:7007-7027
	miRNA 3' GACGUCGUAGUAGUUCUAAGA 5'
	||::|||||||||||||||
	target 5' GUGUGGCAUCAUCAAGAUUCA 3'
190	>mdm-miR172n	MSTRG.24932.13 Chr03 11702037-11710044	score:1	range:6951-6971
	miRNA 3' GACGUCGUAGUAGUUCUAAGA 5'
	||||||||||||||||||||
	target 5' AUGCAGCAUCAUCAAGAUUCU 3'
191	>mdm-miR172n	MSTRG.58353.2 Chr07 24603650-24605732	score:1	range:707-727
	miRNA 3' GACGUCGUAGUAGUUCUAAGA 5'
	||||||||||||||||||||
	target 5' AUGCAGCAUCAUCAAGAUUCU 3'
192	>mdm-miR172n	MSTRG.58353.2 Chr07 24603650-24605732	score:2	range:625-645
	miRNA 3' GACGUCGUAGUAGUUCUAAGA 5'
	|||||||||||||||||||
	target 5' GUGCAGCAUCAUCAAGAUUCA 3'
193	>mdm-miR172n	MSTRG.24932.13 Chr03 11702037-11710044	score:3	range:7007-7027
	miRNA 3' GACGUCGUAGUAGUUCUAAGA 5'
	||::|||||||||||||||
	target 5' GUGUGGCAUCAUCAAGAUUCA 3'
194	>mdm-miR172o	MSTRG.24932.13 Chr03 11702037-11710044	score:1	range:6951-6971
	miRNA 3' GACGUCGUAGUAGUUCUAAGA 5'
	||||||||||||||||||||
	target 5' AUGCAGCAUCAUCAAGAUUCU 3'
195	>mdm-miR172o	MSTRG.58353.2 Chr07 24603650-24605732	score:1	range:707-727
	miRNA 3' GACGUCGUAGUAGUUCUAAGA 5'
	||||||||||||||||||||
	target 5' AUGCAGCAUCAUCAAGAUUCU 3'
196	>mdm-miR172o	MSTRG.58353.2 Chr07 24603650-24605732	score:2	range:625-645
	miRNA 3' GACGUCGUAGUAGUUCUAAGA 5'
	|||||||||||||||||||
	target 5' GUGCAGCAUCAUCAAGAUUCA 3'
197	>mdm-miR172o	MSTRG.24932.13 Chr03 11702037-11710044	score:3	range:7007-7027
	miRNA 3' GACGUCGUAGUAGUUCUAAGA 5'
	||::|||||||||||||||
	target 5' GUGUGGCAUCAUCAAGAUUCA 3'
198	>mdm-miR3627a	MSTRG.139861.1 Chr17 3316292-3321103	score:2	range:678-697
	miRNA 3' AUCACGGUAGAGAGGACGCU 5'
	||||||||||||||:||:||
	target 5' UAGUGCCAUCUCUCUUGUGA 3'
199	>mdm-miR3627b	MSTRG.139861.1 Chr17 3316292-3321103	score:2	range:678-697
	miRNA 3' AUCACGGUAGAGAGGACGCU 5'
	||||||||||||||:||:||
	target 5' UAGUGCCAUCUCUCUUGUGA 3'
200	>mdm-miR3627c	MSTRG.139861.1 Chr17 3316292-3321103	score:2	range:678-697
	miRNA 3' AUCACGGUAGAGAGGACGCU 5'
	||||||||||||||:||:||
	target 5' UAGUGCCAUCUCUCUUGUGA 3'
201	>mdm-miR396c	MSTRG.89841.1 Chr11 13942675-13953865	score:3	range:76-96
	miRNA 3' UUCAAGUUCUUUCGACACCUU 5'
	||| |||||||| ||||||||
	target 5' AAGCUCAAGAAAUCUGUGGAA 3'
202	>mdm-miR396d	MSTRG.89841.1 Chr11 13942675-13953865	score:3	range:76-96
	miRNA 3' UUCAAGUUCUUUCGACACCUU 5'
	||| |||||||| ||||||||
	target 5' AAGCUCAAGAAAUCUGUGGAA 3'
203	>mdm-miR396e	MSTRG.89841.1 Chr11 13942675-13953865	score:3	range:76-96
	miRNA 3' UUCAAGUUCUUUCGACACCUU 5'
	||| |||||||| ||||||||
	target 5' AAGCUCAAGAAAUCUGUGGAA 3'
204	>mdm-miR482b	MSTRG.103191.2 Chr13 2391513-2394209	score:0	range:2088-2109
	miRNA 3' CCUUACCCUCCCUAUCCUUUCU 5'
	||||||||||||||||||||||
	target 5' GGAAUGGGAGGGAUAGGAAAGA 3'
205	>mdm-miR482b	MSTRG.103191.1 Chr13 2391513-2405228	score:2	range:3512-3533
	miRNA 3' CCUUACCCUCCCUAUCCUUUCU 5'
	|||||||||||| |||||||||
	target 5' GGAAUGGGAGGGUUAGGAAAGA 3'
206	>mdm-miR482b	MSTRG.103191.4 Chr13 2400950-2405187	score:2	range:3741-3762
	miRNA 3' CCUUACCCUCCCUAUCCUUUCU 5'
	|||||||||||| |||||||||
	target 5' GGAAUGGGAGGGUUAGGAAAGA 3'
207	>mdm-miR482b	MSTRG.103191.2 Chr13 2391513-2394209	score:3	range:2151-2171
	miRNA 3' CCUUACCCUCCCUAUCCUUUCU 5'
	||||||| |||| |||||||||
	target 5' GGAAUGGAAGGG-UAGGAAAGA 3'
208	>mdm-miR482c	MSTRG.103191.1 Chr13 2391513-2405228	score:0	range:3512-3533
	miRNA 3' CCUUACCCUCCCAAUCCUUUCU 5'
	||||||||||||||||||||||
	target 5' GGAAUGGGAGGGUUAGGAAAGA 3'
209	>mdm-miR482c	MSTRG.103191.4 Chr13 2400950-2405187	score:0	range:3741-3762
	miRNA 3' CCUUACCCUCCCAAUCCUUUCU 5'
	||||||||||||||||||||||
	target 5' GGAAUGGGAGGGUUAGGAAAGA 3'
210	>mdm-miR482c	MSTRG.103191.2 Chr13 2391513-2394209	score:2	range:2088-2109
	miRNA 3' CCUUACCCUCCCAAUCCUUUCU 5'
	|||||||||||| |||||||||
	target 5' GGAAUGGGAGGGAUAGGAAAGA 3'
211	>mdm-miR482c	MSTRG.103191.2 Chr13 2391513-2394209	score:3	range:2151-2171
	miRNA 3' CCUUACCCUCCCAAUCCUUUCU 5'
	||||||| |||| |||||||||
	target 5' GGAAUGGAAGGG-UAGGAAAGA 3'
212	>mdm-miR482d	MSTRG.103191.2 Chr13 2391513-2394209	score:0	range:2149-2169
	miRNA 3' GAAGAAAGGAUGGGAAGGUAA 5'
	|||||||||||||||||||||
	target 5' CUUCUUUCCUACCCUUCCAUU 3'
213	>mdm-miR482d	MSTRG.103191.1 Chr13 2391513-2405228	score:2	range:3573-3593
	miRNA 3' GAAGAAAGGAUGGGAAGGUAA 5'
	||||||||||||||||||| |
	target 5' CUUCUUUCCUACCCUUCCACU 3'
214	>mdm-miR482d	MSTRG.103191.4 Chr13 2400950-2405187	score:2	range:3802-3822
	miRNA 3' GAAGAAAGGAUGGGAAGGUAA 5'
	||||||||||||||||||| |
	target 5' CUUCUUUCCUACCCUUCCACU 3'
215	>mdm-miR5225a	MSTRG.139861.2 Chr17 3317454-3319262	score:0	range:470-491
	miRNA 3' CGUGGUAGAGUGGAAGCUGUCU 5'
	||||||||||||||||||||||
	target 5' GCACCAUCUCACCUUCGACAGA 3'
216	>mdm-miR5225a	MSTRG.139861.1 Chr17 3316292-3321103	score:0	range:1632-1653
	miRNA 3' CGUGGUAGAGUGGAAGCUGUCU 5'
	||||||||||||||||||||||
	target 5' GCACCAUCUCACCUUCGACAGA 3'
217	>mdm-miR5225b	MSTRG.139861.2 Chr17 3317454-3319262	score:0	range:470-491
	miRNA 3' CGUGGUAGAGUGGAAGCUGUCU 5'
	||||||||||||||||||||||
	target 5' GCACCAUCUCACCUUCGACAGA 3'
218	>mdm-miR5225b	MSTRG.139861.1 Chr17 3316292-3321103	score:0	range:1632-1653
	miRNA 3' CGUGGUAGAGUGGAAGCUGUCU 5'
	||||||||||||||||||||||
	target 5' GCACCAUCUCACCUUCGACAGA 3'
219	>mdm-miR5225c	MSTRG.139861.2 Chr17 3317454-3319262	score:3	range:470-491
	miRNA 3' CGUGGUAGAGUGGGUGCUGUCU 5'
	|||||||||||||: |||||||
	target 5' GCACCAUCUCACCUUCGACAGA 3'
220	>mdm-miR5225c	MSTRG.139861.1 Chr17 3316292-3321103	score:3	range:1632-1653
	miRNA 3' CGUGGUAGAGUGGGUGCUGUCU 5'
	|||||||||||||: |||||||
	target 5' GCACCAUCUCACCUUCGACAGA 3'
221	>mdm-miR535a	MSTRG.41686.13 Chr05 28457871-28466318	score:0	range:1271-1291
	miRNA 3' CGCACGAGAGAGAGCAACAGU 5'
	|||||||||||||||||||||
	target 5' GCGUGCUCUCUCUCGUUGUCA 3'
222	>mdm-miR535a	MSTRG.81674.11 Chr10 23610644-23616660	score:2	range:1299-1319
	miRNA 3' CGCACGAGAGAGAGCAACAGU 5'
	|||||||||:|||:|||||||
	target 5' GCGUGCUCUUUCUUGUUGUCA 3'
223	>mdm-miR535a	MSTRG.41686.13 Chr05 28457871-28466318	score:2	range:1329-1349
	miRNA 3' CGCACGAGAGAGAGCAACAGU 5'
	|||||| ||||||:|||||||
	target 5' GCGUGCCCUCUCUUGUUGUCA 3'
224	>mdm-miR535a	MSTRG.81674.11 Chr10 23610644-23616660	score:2	range:1241-1261
	miRNA 3' CGCACGAGAGAGAGCAACAGU 5'
	|||||||||||||||| ||||
	target 5' GCGUGCUCUCUCUCGUCGUCA 3'
225	>mdm-miR535b	MSTRG.41686.13 Chr05 28457871-28466318	score:2	range:1271-1291
	miRNA 3' CGCACGAGAGAGAGGAACAGU 5'
	|||||||||||||| ||||||
	target 5' GCGUGCUCUCUCUCGUUGUCA 3'
226	>mdm-miR535c	MSTRG.41686.13 Chr05 28457871-28466318	score:2	range:1271-1291
	miRNA 3' CGCACGAGAGAGAGGAACAGU 5'
	|||||||||||||| ||||||
	target 5' GCGUGCUCUCUCUCGUUGUCA 3'
227	>mdm-miR535d	MSTRG.81674.11 Chr10 23610644-23616660	score:0	range:1241-1261
	miRNA 3' CGCACGAGAGAGAGCAGCAGU 5'
	|||||||||||||||||||||
	target 5' GCGUGCUCUCUCUCGUCGUCA 3'
228	>mdm-miR535d	MSTRG.41686.13 Chr05 28457871-28466318	score:1	range:1271-1291
	miRNA 3' CGCACGAGAGAGAGCAGCAGU 5'
	||||||||||||||||:||||
	target 5' GCGUGCUCUCUCUCGUUGUCA 3'
229	>mdm-miR535d	MSTRG.81674.11 Chr10 23610644-23616660	score:3	range:1299-1319
	miRNA 3' CGCACGAGAGAGAGCAGCAGU 5'
	|||||||||:|||:||:||||
	target 5' GCGUGCUCUUUCUUGUUGUCA 3'
230	>mdm-miR535d	MSTRG.41686.13 Chr05 28457871-28466318	score:3	range:1329-1349
	miRNA 3' CGCACGAGAGAGAGCAGCAGU 5'
	|||||| ||||||:||:||||
	target 5' GCGUGCCCUCUCUUGUUGUCA 3'
231	>mdm-miR828a	MSTRG.82843.2 Chr10 28717315-28719923	score:3	range:944-964
	miRNA 3' ACCUUAUGAGUAAACUCGUUCU 5'
	||||:||:|||||||| |||||
	target 5' UGGAGUAUUCAUUUGA-CAAGA 3'
232	>mdm-miR828b	MSTRG.82843.2 Chr10 28717315-28719923	score:3	range:944-964
	miRNA 3' ACCUUAUGAGUAAACUCGUUCU 5'
	||||:||:|||||||| |||||
	target 5' UGGAGUAUUCAUUUGA-CAAGA 3'
233	>mdm-miR858	MSTRG.131008.8 Chr16 2052041-2053265	score:1	range:681-702
	miRNA 3' AG-UCCAGCUUGUCUGUUGCUU 5'
	|| |||||||||||||||||||
	target 5' UCAAGGUCGAACAGACAACGAA 3'
234	>mdm-miR10983	MSTRG.74301.14 Chr09 20067697-20069018	score:3	range:518-538
	miRNA 3' AAGGUGCUGACAAAACGAGAC 5'
	||:::| :|||||||||||||
	target 5' UUUUGCCGCUGUUUUGCUCUG 3'
235	>mdm-miR10995	MSTRG.122315.1 Chr15 13989829-14021241	score:3	range:115-136
	miRNA 3' UGCUCAUACUUCUCCUUCGAAC 5'
	|| | ||||||||||||||||
	target 5' ACAAACAUGAAGAGGAAGCUUG 3'
236	>mdm-miR10995	MSTRG.82464.1 Chr10 27120712-27134678	score:3	range:141-162
	miRNA 3' UGCUCAUACUUCUCCUUCGAAC 5'
	|| | ||||||||||||||||
	target 5' ACAAACAUGAAGAGGAAGCUUG 3'
237	>mdm-miR10995	MSTRG.28864.1 Chr03 33507092-33560873	score:3	range:336-357
	miRNA 3' UGCUCAUACUUCUCCUUCGAAC 5'
	|| | ||||||||||||||||
	target 5' ACAAACAUGAAGAGGAAGCUUG 3'
238	>mdm-miR10995	MSTRG.52077.1 Chr06 31813050-31813804	score:3	range:497-518
	miRNA 3' UGCUCAUACUUCUCCUUCGAAC 5'
	|| | ||||||||||||||||
	target 5' ACAAACAUGAAGAGGAAGCUUG 3'
239	>mdm-miR10995	MSTRG.25801.1 Chr03 16371559-16372360	score:3	range:576-597
	miRNA 3' UGCUCAUACUUCUCCUUCGAAC 5'
	|| | ||||||||||||||||
	target 5' ACAAACAUGAAGAGGAAGCUUG 3'
240	>mdm-miR10995	MSTRG.111591.2 Chr14 2331149-2361912	score:3	range:379-400
	miRNA 3' UGCUCAUACUUCUCCUUCGAAC 5'
	|| | ||||||||||||||||
	target 5' ACAAACAUGAAGAGGAAGCUUG 3'
241	>mdm-miR10995	MSTRG.88802.2 Chr11 9000943-9056165	score:3	range:559-580
	miRNA 3' UGCUCAUACUUCUCCUUCGAAC 5'
	|| | ||||||||||||||||
	target 5' ACAAACAUGAAGAGGAAGCUUG 3'
242	>mdm-miR159d	MSTRG.29411.6 Chr03 35514183-35514755	score:2	range:368-387
	miRNA 3' AUCUCGAGGGAAGUUAGGUUU 5'
	||||| ||||||||||||||
	target 5' UAGAG-UCCCUUCAAUCCAAU 3'
243	>mdm-miR159e	MSTRG.29411.6 Chr03 35514183-35514755	score:2	range:368-387
	miRNA 3' AUCUCGAGGGAAGUUAGGUUU 5'
	||||| ||||||||||||||
	target 5' UAGAG-UCCCUUCAAUCCAAU 3'
244	>mdm-miR159f	MSTRG.29411.6 Chr03 35514183-35514755	score:2	range:368-387
	miRNA 3' AUCUCGAGGGAAGUUAGGUUU 5'
	||||| ||||||||||||||
	target 5' UAGAG-UCCCUUCAAUCCAAU 3'
245	>mdm-miR166j	MSTRG.50564.2 Chr06 25849565-25852065	score:0	range:516-536
	miRNA 3' CCCCUUACUUCGGACCAGGCU 5'
	|||||||||||||||||||||
	target 5' GGGGAAUGAAGCCUGGUCCGA 3'
246	>mdm-miR166j	MSTRG.57916.3 Chr07 22707622-22712440	score:0	range:431-451
	miRNA 3' CCCCUUACUUCGGACCAGGCU 5'
	|||||||||||||||||||||
	target 5' GGGGAAUGAAGCCUGGUCCGA 3'
247	>mdm-miR171p	MSTRG.71519.1 Chr09 8183234-8186218	score:0	range:1034-1054
	miRNA 3' CCUCUAUAACUGCGCCGAGUU 5'
	|||||||||||||||||||||
	target 5' GGAGAUAUUGACGCGGCUCAA 3'
248	>mdm-miR10993c	MSTRG.4153.26 Chr00 25885238-25920799	score:1.5	range:1652-1672
	miRNA 3' UGUCCUACCAUGUGGUGUACA 5'
	||:||||||||||||||:|||
	target 5' ACGGGAUGGUACACCACGUGU 3'
249	>mdm-miR10993c	MSTRG.33331.7 Chr04 18730258-18735122	score:2.5	range:76-96
	miRNA 3' UGUCCUACCAUGUGGUGUACA 5'
	||:|||| ||||||||:||||
	target 5' ACGGGAUAGUACACCAUAUGU 3'
250	>mdm-miR10993c	MSTRG.33331.8 Chr04 18730272-18735180	score:2.5	range:62-82
	miRNA 3' UGUCCUACCAUGUGGUGUACA 5'
	||:|||| ||||||||:||||
	target 5' ACGGGAUAGUACACCAUAUGU 3'
251	>mdm-miR10993c	MSTRG.33331.6 Chr04 18730229-18735130	score:2.5	range:105-125
	miRNA 3' UGUCCUACCAUGUGGUGUACA 5'
	||:|||| ||||||||:||||
	target 5' ACGGGAUAGUACACCAUAUGU 3'
252	>mdm-miR10993d	MSTRG.4153.26 Chr00 25885238-25920799	score:1.5	range:1652-1672
	miRNA 3' UGUCCUACCAUGUGGUGUACA 5'
	||:||||||||||||||:|||
	target 5' ACGGGAUGGUACACCACGUGU 3'
253	>mdm-miR10993d	MSTRG.33331.7 Chr04 18730258-18735122	score:2.5	range:76-96
	miRNA 3' UGUCCUACCAUGUGGUGUACA 5'
	||:|||| ||||||||:||||
	target 5' ACGGGAUAGUACACCAUAUGU 3'
254	>mdm-miR10993d	MSTRG.33331.8 Chr04 18730272-18735180	score:2.5	range:62-82
	miRNA 3' UGUCCUACCAUGUGGUGUACA 5'
	||:|||| ||||||||:||||
	target 5' ACGGGAUAGUACACCAUAUGU 3'
255	>mdm-miR10993d	MSTRG.33331.6 Chr04 18730229-18735130	score:2.5	range:105-125
	miRNA 3' UGUCCUACCAUGUGGUGUACA 5'
	||:|||| ||||||||:||||
	target 5' ACGGGAUAGUACACCAUAUGU 3'
256	>mdm-miR10993e	MSTRG.4153.26 Chr00 25885238-25920799	score:1.5	range:1652-1672
	miRNA 3' UGUCCUACCAUGUGGUGUACA 5'
	||:||||||||||||||:|||
	target 5' ACGGGAUGGUACACCACGUGU 3'
257	>mdm-miR10993e	MSTRG.33331.7 Chr04 18730258-18735122	score:2.5	range:76-96
	miRNA 3' UGUCCUACCAUGUGGUGUACA 5'
	||:|||| ||||||||:||||
	target 5' ACGGGAUAGUACACCAUAUGU 3'
258	>mdm-miR10993e	MSTRG.33331.8 Chr04 18730272-18735180	score:2.5	range:62-82
	miRNA 3' UGUCCUACCAUGUGGUGUACA 5'
	||:|||| ||||||||:||||
	target 5' ACGGGAUAGUACACCAUAUGU 3'
259	>mdm-miR10993e	MSTRG.33331.6 Chr04 18730229-18735130	score:2.5	range:105-125
	miRNA 3' UGUCCUACCAUGUGGUGUACA 5'
	||:|||| ||||||||:||||
	target 5' ACGGGAUAGUACACCAUAUGU 3'
260	>mdm-miR10993f	MSTRG.4153.26 Chr00 25885238-25920799	score:1.5	range:1652-1672
	miRNA 3' UGUCCUACCAUGUGGUGUACA 5'
	||:||||||||||||||:|||
	target 5' ACGGGAUGGUACACCACGUGU 3'
261	>mdm-miR10993f	MSTRG.33331.7 Chr04 18730258-18735122	score:2.5	range:76-96
	miRNA 3' UGUCCUACCAUGUGGUGUACA 5'
	||:|||| ||||||||:||||
	target 5' ACGGGAUAGUACACCAUAUGU 3'
262	>mdm-miR10993f	MSTRG.33331.8 Chr04 18730272-18735180	score:2.5	range:62-82
	miRNA 3' UGUCCUACCAUGUGGUGUACA 5'
	||:|||| ||||||||:||||
	target 5' ACGGGAUAGUACACCAUAUGU 3'
263	>mdm-miR10993f	MSTRG.33331.6 Chr04 18730229-18735130	score:2.5	range:105-125
	miRNA 3' UGUCCUACCAUGUGGUGUACA 5'
	||:|||| ||||||||:||||
	target 5' ACGGGAUAGUACACCAUAUGU 3'
264	>mdm-miR10999a	MSTRG.25588.3 Chr03 15190077-15193791	score:2.5	range:1318-1338
	miRNA 3' UCCACACACUUAUAGUGCGGG 5'
	:|||||||||||||||| |||
	target 5' GGGUGUGUGAAUAUCACACCC 3'
265	>mdm-miR10999b	MSTRG.25588.3 Chr03 15190077-15193791	score:2.5	range:1318-1338
	miRNA 3' UCCACACACUUAUAGUGCGGG 5'
	:|||||||||||||||| |||
	target 5' GGGUGUGUGAAUAUCACACCC 3'
266	>mdm-miR11002a	MSTRG.110261.6 Chr13 36717422-36719632	score:3	range:405-425
	miRNA 3' AGUGGCGGCUUCGAGUAGGAG 5'
	|:||| ::||||||||||||:
	target 5' UUACCCUUGAAGCUCAUCCUU 3'
267	>mdm-miR11002a	MSTRG.110261.3 Chr13 36716955-36719624	score:3	range:872-892
	miRNA 3' AGUGGCGGCUUCGAGUAGGAG 5'
	|:||| ::||||||||||||:
	target 5' UUACCCUUGAAGCUCAUCCUU 3'
268	>mdm-miR11002b	MSTRG.110261.6 Chr13 36717422-36719632	score:3	range:405-425
	miRNA 3' AGUGGCGGCUUCGAGUAGGAG 5'
	|:||| ::||||||||||||:
	target 5' UUACCCUUGAAGCUCAUCCUU 3'
269	>mdm-miR11002b	MSTRG.110261.3 Chr13 36716955-36719624	score:3	range:872-892
	miRNA 3' AGUGGCGGCUUCGAGUAGGAG 5'
	|:||| ::||||||||||||:
	target 5' UUACCCUUGAAGCUCAUCCUU 3'
270	>mdm-miR11002c-3p	MSTRG.110261.6 Chr13 36717422-36719632	score:3	range:405-425
	miRNA 3' AGUGGCGGCUUCGAGUAGGAG 5'
	|:||| ::||||||||||||:
	target 5' UUACCCUUGAAGCUCAUCCUU 3'
271	>mdm-miR11002c-3p	MSTRG.110261.3 Chr13 36716955-36719624	score:3	range:872-892
	miRNA 3' AGUGGCGGCUUCGAGUAGGAG 5'
	|:||| ::||||||||||||:
	target 5' UUACCCUUGAAGCUCAUCCUU 3'
272	>mdm-miR11004	MSTRG.134000.2 Chr16 11695836-11697032	score:0	range:349-369
	miRNA 3' AUCAUCUUCUACUUUCUUAUG 5'
	|||||||||||||||||||||
	target 5' UAGUAGAAGAUGAAAGAAUAC 3'
273	>mdm-miR11007	MSTRG.44682.4 Chr05 40764010-40771981	score:2.5	range:210-229
	miRNA 3' UGCAUGGUUUUAUUAACUGCC 5'
	|:| ||||:||||||||||||
	target 5' AUG-ACCAGAAUAAUUGACGG 3'
274	>mdm-miR11008	MSTRG.84298.6 Chr10 34205342-34208228	score:1	range:533-553
	miRNA 3' AGAAGAUAAAACACGCCAGUG 5'
	||||||||||||||||||||
	target 5' CCUUCUAUUUUGUGCGGUCAC 3'
275	>mdm-miR11008	MSTRG.84298.8 Chr10 34205446-34296630	score:1	range:1544-1564
	miRNA 3' AGAAGAUAAAACACGCCAGUG 5'
	||||||||||||||||||||
	target 5' CCUUCUAUUUUGUGCGGUCAC 3'
276	>mdm-miR11008	MSTRG.84298.10 Chr10 34205499-34208597	score:1	range:1583-1603
	miRNA 3' AGAAGAUAAAACACGCCAGUG 5'
	||||||||||||||||||||
	target 5' CCUUCUAUUUUGUGCGGUCAC 3'
277	>mdm-miR11008	MSTRG.59035.3 Chr07 27313137-27314873	score:3	range:137-156
	miRNA 3' AGAAGAUAAAACACGCCAGUG 5'
	|| ||| |||||||||||||
	target 5' CCUCCUA-UUUGUGCGGUCAC 3'
278	>mdm-miR11008	MSTRG.59035.2 Chr07 27313137-27314938	score:3	range:137-156
	miRNA 3' AGAAGAUAAAACACGCCAGUG 5'
	|| ||| |||||||||||||
	target 5' CCUCCUA-UUUGUGCGGUCAC 3'
279	>mdm-miR11008	MSTRG.59035.1 Chr07 27312851-27314938	score:3	range:423-442
	miRNA 3' AGAAGAUAAAACACGCCAGUG 5'
	|| ||| |||||||||||||
	target 5' CCUCCUA-UUUGUGCGGUCAC 3'
280	>mdm-miR11015	MSTRG.135672.1 Chr16 18874987-18877412	score:0.5	range:783-803
	miRNA 3' GUCCAACCCAGUAAAAUGGGU 5'
	||||||||||||||||||||:
	target 5' CAGGUUGGGUCAUUUUACCCG 3'
281	>mdm-miR11015	MSTRG.109203.2 Chr13 26491955-26493788	score:1.5	range:1162-1182
	miRNA 3' GUCCAACCCAGUAAAAUGGGU 5'
	||||||||||:|||||||||:
	target 5' CAGGUUGGGUUAUUUUACCCG 3'
282	>mdm-miR11015	MSTRG.137956.16 Chr16 33866161-33875265	score:3	range:160-180
	miRNA 3' GUCCAACCCAGUAAAAUGGGU 5'
	|||||| | ||||||||||||
	target 5' CAGGUUUGAUCAUUUUACCCA 3'
283	>mdm-miR11015	MSTRG.137956.14 Chr16 33866096-33875265	score:3	range:225-245
	miRNA 3' GUCCAACCCAGUAAAAUGGGU 5'
	|||||| | ||||||||||||
	target 5' CAGGUUUGAUCAUUUUACCCA 3'
284	>mdm-miR11015	MSTRG.137956.13 Chr16 33866096-33875265	score:3	range:225-245
	miRNA 3' GUCCAACCCAGUAAAAUGGGU 5'
	|||||| | ||||||||||||
	target 5' CAGGUUUGAUCAUUUUACCCA 3'
285	>mdm-miR11015	MSTRG.137956.5 Chr16 33865916-33875265	score:3	range:405-425
	miRNA 3' GUCCAACCCAGUAAAAUGGGU 5'
	|||||| | ||||||||||||
	target 5' CAGGUUUGAUCAUUUUACCCA 3'
286	>mdm-miR11015	MSTRG.137956.3 Chr16 33865731-33875293	score:3	range:590-610
	miRNA 3' GUCCAACCCAGUAAAAUGGGU 5'
	|||||| | ||||||||||||
	target 5' CAGGUUUGAUCAUUUUACCCA 3'
287	>mdm-miR172p	MSTRG.24932.13 Chr03 11702037-11710044	score:0	range:6951-6971
	miRNA 3' UACGUCGUAGUAGUUCUAAGA 5'
	|||||||||||||||||||||
	target 5' AUGCAGCAUCAUCAAGAUUCU 3'
288	>mdm-miR172p	MSTRG.58353.2 Chr07 24603650-24605732	score:0	range:707-727
	miRNA 3' UACGUCGUAGUAGUUCUAAGA 5'
	|||||||||||||||||||||
	target 5' AUGCAGCAUCAUCAAGAUUCU 3'
289	>mdm-miR172p	MSTRG.58353.2 Chr07 24603650-24605732	score:1.5	range:625-645
	miRNA 3' UACGUCGUAGUAGUUCUAAGA 5'
	:|||||||||||||||||||
	target 5' GUGCAGCAUCAUCAAGAUUCA 3'
290	>mdm-miR172p	MSTRG.24932.13 Chr03 11702037-11710044	score:2.5	range:7007-7027
	miRNA 3' UACGUCGUAGUAGUUCUAAGA 5'
	:||::|||||||||||||||
	target 5' GUGUGGCAUCAUCAAGAUUCA 3'
291	>mdm-miR395k	MSTRG.146176.2 Chr17 32758810-32768231	score:3	range:23-41
	miRNA 3' UUACUUCACAAACUCCUUUG 5'
	|:|| |||||||||||:||:
	target 5' AGUG-AGUGUUUGAGGGAAU 3'

## Sheet: Table S11-2
Table S11-2 Details of interactions between lncRNAs and miRNAs in roots only
No.	Sequence pairs of lncRNAs and miRNAs	LncRNA_ID and location	Score	Range
1	>mdm-miR156aa	MSTRG.63448.2 Chr08 5220698-5222177	score:3	range:308-327
	miRNA 3' CACGAGAGAUAGAAGACAGU 5'
	|||||| || ||||||||||
	target 5' GUGCUCACUCUCUUCUGUCA 3'
2	>mdm-miR156ad	MSTRG.63448.2 Chr08 5220698-5222177	score:2	range:308-327
	miRNA 3' CACGAGUGAAAGAAGACAGU 5'
	||||||||| ||||||||||
	target 5' GUGCUCACUCUCUUCUGUCA 3'
3	>mdm-miR156ad	MSTRG.121644.8 Chr15 11433222-11434086	score:3	range:253-272
	miRNA 3' CACGAGUGAAAGAAGACAGU 5'
	| ||||||| ||||||||||
	target 5' GAGCUCACUCUCUUCUGUCA 3'
4	>mdm-miR156ae	MSTRG.63448.2 Chr08 5220698-5222177	score:2	range:308-327
	miRNA 3' CACGAGUGAAAGAAGACAGU 5'
	||||||||| ||||||||||
	target 5' GUGCUCACUCUCUUCUGUCA 3'
5	>mdm-miR156ae	MSTRG.121644.8 Chr15 11433222-11434086	score:3	range:253-272
	miRNA 3' CACGAGUGAAAGAAGACAGU 5'
	| ||||||| ||||||||||
	target 5' GAGCUCACUCUCUUCUGUCA 3'
6	>mdm-miR156a	MSTRG.63448.2 Chr08 5220698-5222177	score:0	range:308-327
	miRNA 3' CACGAGUGAGAGAAGACAGU 5'
	||||||||||||||||||||
	target 5' GUGCUCACUCUCUUCUGUCA 3'
7	>mdm-miR156a	MSTRG.121644.8 Chr15 11433222-11434086	score:1	range:253-272
	miRNA 3' CACGAGUGAGAGAAGACAGU 5'
	| ||||||||||||||||||
	target 5' GAGCUCACUCUCUUCUGUCA 3'
8	>mdm-miR156a	MSTRG.121644.5 Chr15 11417886-11419971	score:2	range:270-289
	miRNA 3' CACGAGUGAGAGAAGACAGU 5'
	||||||||||||||||||
	target 5' CAGCUCACUCUCUUCUGUCA 3'
9	>mdm-miR156b	MSTRG.63448.2 Chr08 5220698-5222177	score:0	range:308-327
	miRNA 3' CACGAGUGAGAGAAGACAGU 5'
	||||||||||||||||||||
	target 5' GUGCUCACUCUCUUCUGUCA 3'
10	>mdm-miR156b	MSTRG.121644.8 Chr15 11433222-11434086	score:1	range:253-272
	miRNA 3' CACGAGUGAGAGAAGACAGU 5'
	| ||||||||||||||||||
	target 5' GAGCUCACUCUCUUCUGUCA 3'
11	>mdm-miR156b	MSTRG.121644.5 Chr15 11417886-11419971	score:2	range:270-289
	miRNA 3' CACGAGUGAGAGAAGACAGU 5'
	||||||||||||||||||
	target 5' CAGCUCACUCUCUUCUGUCA 3'
12	>mdm-miR156c	MSTRG.63448.2 Chr08 5220698-5222177	score:0	range:308-327
	miRNA 3' CACGAGUGAGAGAAGACAGU 5'
	||||||||||||||||||||
	target 5' GUGCUCACUCUCUUCUGUCA 3'
13	>mdm-miR156c	MSTRG.121644.8 Chr15 11433222-11434086	score:1	range:253-272
	miRNA 3' CACGAGUGAGAGAAGACAGU 5'
	| ||||||||||||||||||
	target 5' GAGCUCACUCUCUUCUGUCA 3'
14	>mdm-miR156c	MSTRG.121644.5 Chr15 11417886-11419971	score:2	range:270-289
	miRNA 3' CACGAGUGAGAGAAGACAGU 5'
	||||||||||||||||||
	target 5' CAGCUCACUCUCUUCUGUCA 3'
15	>mdm-miR156d	MSTRG.63448.2 Chr08 5220698-5222177	score:0	range:308-327
	miRNA 3' CACGAGUGAGAGAAGACAGU 5'
	||||||||||||||||||||
	target 5' GUGCUCACUCUCUUCUGUCA 3'
16	>mdm-miR156d	MSTRG.121644.8 Chr15 11433222-11434086	score:1	range:253-272
	miRNA 3' CACGAGUGAGAGAAGACAGU 5'
	| ||||||||||||||||||
	target 5' GAGCUCACUCUCUUCUGUCA 3'
17	>mdm-miR156d	MSTRG.121644.5 Chr15 11417886-11419971	score:2	range:270-289
	miRNA 3' CACGAGUGAGAGAAGACAGU 5'
	||||||||||||||||||
	target 5' CAGCUCACUCUCUUCUGUCA 3'
18	>mdm-miR156e	MSTRG.63448.2 Chr08 5220698-5222177	score:0	range:308-327
	miRNA 3' CACGAGUGAGAGAAGACAGU 5'
	||||||||||||||||||||
	target 5' GUGCUCACUCUCUUCUGUCA 3'
19	>mdm-miR156e	MSTRG.121644.8 Chr15 11433222-11434086	score:1	range:253-272
	miRNA 3' CACGAGUGAGAGAAGACAGU 5'
	| ||||||||||||||||||
	target 5' GAGCUCACUCUCUUCUGUCA 3'
20	>mdm-miR156e	MSTRG.121644.5 Chr15 11417886-11419971	score:2	range:270-289
	miRNA 3' CACGAGUGAGAGAAGACAGU 5'
	||||||||||||||||||
	target 5' CAGCUCACUCUCUUCUGUCA 3'
21	>mdm-miR156f	MSTRG.63448.2 Chr08 5220698-5222177	score:0	range:308-327
	miRNA 3' CACGAGUGAGAGAAGACAGU 5'
	||||||||||||||||||||
	target 5' GUGCUCACUCUCUUCUGUCA 3'
22	>mdm-miR156f	MSTRG.121644.8 Chr15 11433222-11434086	score:1	range:253-272
	miRNA 3' CACGAGUGAGAGAAGACAGU 5'
	| ||||||||||||||||||
	target 5' GAGCUCACUCUCUUCUGUCA 3'
23	>mdm-miR156f	MSTRG.121644.5 Chr15 11417886-11419971	score:2	range:270-289
	miRNA 3' CACGAGUGAGAGAAGACAGU 5'
	||||||||||||||||||
	target 5' CAGCUCACUCUCUUCUGUCA 3'
24	>mdm-miR156g	MSTRG.63448.2 Chr08 5220698-5222177	score:0	range:308-327
	miRNA 3' CACGAGUGAGAGAAGACAGU 5'
	||||||||||||||||||||
	target 5' GUGCUCACUCUCUUCUGUCA 3'
25	>mdm-miR156g	MSTRG.121644.8 Chr15 11433222-11434086	score:1	range:253-272
	miRNA 3' CACGAGUGAGAGAAGACAGU 5'
	| ||||||||||||||||||
	target 5' GAGCUCACUCUCUUCUGUCA 3'
26	>mdm-miR156g	MSTRG.121644.5 Chr15 11417886-11419971	score:2	range:270-289
	miRNA 3' CACGAGUGAGAGAAGACAGU 5'
	||||||||||||||||||
	target 5' CAGCUCACUCUCUUCUGUCA 3'
27	>mdm-miR156h	MSTRG.63448.2 Chr08 5220698-5222177	score:0	range:308-327
	miRNA 3' CACGAGUGAGAGAAGACAGU 5'
	||||||||||||||||||||
	target 5' GUGCUCACUCUCUUCUGUCA 3'
28	>mdm-miR156h	MSTRG.121644.8 Chr15 11433222-11434086	score:1	range:253-272
	miRNA 3' CACGAGUGAGAGAAGACAGU 5'
	| ||||||||||||||||||
	target 5' GAGCUCACUCUCUUCUGUCA 3'
29	>mdm-miR156h	MSTRG.121644.5 Chr15 11417886-11419971	score:2	range:270-289
	miRNA 3' CACGAGUGAGAGAAGACAGU 5'
	||||||||||||||||||
	target 5' CAGCUCACUCUCUUCUGUCA 3'
30	>mdm-miR156i	MSTRG.63448.2 Chr08 5220698-5222177	score:0	range:308-327
	miRNA 3' CACGAGUGAGAGAAGACAGU 5'
	||||||||||||||||||||
	target 5' GUGCUCACUCUCUUCUGUCA 3'
31	>mdm-miR156i	MSTRG.121644.8 Chr15 11433222-11434086	score:1	range:253-272
	miRNA 3' CACGAGUGAGAGAAGACAGU 5'
	| ||||||||||||||||||
	target 5' GAGCUCACUCUCUUCUGUCA 3'
32	>mdm-miR156i	MSTRG.121644.5 Chr15 11417886-11419971	score:2	range:270-289
	miRNA 3' CACGAGUGAGAGAAGACAGU 5'
	||||||||||||||||||
	target 5' CAGCUCACUCUCUUCUGUCA 3'
33	>mdm-miR156j	MSTRG.63448.2 Chr08 5220698-5222177	score:0	range:308-327
	miRNA 3' CACGAGUGAGAGAAGACAGU 5'
	||||||||||||||||||||
	target 5' GUGCUCACUCUCUUCUGUCA 3'
34	>mdm-miR156j	MSTRG.121644.8 Chr15 11433222-11434086	score:1	range:253-272
	miRNA 3' CACGAGUGAGAGAAGACAGU 5'
	| ||||||||||||||||||
	target 5' GAGCUCACUCUCUUCUGUCA 3'
35	>mdm-miR156j	MSTRG.121644.5 Chr15 11417886-11419971	score:2	range:270-289
	miRNA 3' CACGAGUGAGAGAAGACAGU 5'
	||||||||||||||||||
	target 5' CAGCUCACUCUCUUCUGUCA 3'
36	>mdm-miR156k	MSTRG.63448.2 Chr08 5220698-5222177	score:0	range:308-327
	miRNA 3' CACGAGUGAGAGAAGACAGU 5'
	||||||||||||||||||||
	target 5' GUGCUCACUCUCUUCUGUCA 3'
37	>mdm-miR156k	MSTRG.121644.8 Chr15 11433222-11434086	score:1	range:253-272
	miRNA 3' CACGAGUGAGAGAAGACAGU 5'
	| ||||||||||||||||||
	target 5' GAGCUCACUCUCUUCUGUCA 3'
38	>mdm-miR156k	MSTRG.121644.5 Chr15 11417886-11419971	score:2	range:270-289
	miRNA 3' CACGAGUGAGAGAAGACAGU 5'
	||||||||||||||||||
	target 5' CAGCUCACUCUCUUCUGUCA 3'
39	>mdm-miR156l	MSTRG.63448.2 Chr08 5220698-5222177	score:0	range:308-327
	miRNA 3' CACGAGUGAGAGAAGACAGU 5'
	||||||||||||||||||||
	target 5' GUGCUCACUCUCUUCUGUCA 3'
40	>mdm-miR156l	MSTRG.121644.8 Chr15 11433222-11434086	score:1	range:253-272
	miRNA 3' CACGAGUGAGAGAAGACAGU 5'
	| ||||||||||||||||||
	target 5' GAGCUCACUCUCUUCUGUCA 3'
41	>mdm-miR156l	MSTRG.121644.5 Chr15 11417886-11419971	score:2	range:270-289
	miRNA 3' CACGAGUGAGAGAAGACAGU 5'
	||||||||||||||||||
	target 5' CAGCUCACUCUCUUCUGUCA 3'
42	>mdm-miR156m	MSTRG.63448.2 Chr08 5220698-5222177	score:0	range:308-327
	miRNA 3' CACGAGUGAGAGAAGACAGU 5'
	||||||||||||||||||||
	target 5' GUGCUCACUCUCUUCUGUCA 3'
43	>mdm-miR156m	MSTRG.121644.8 Chr15 11433222-11434086	score:1	range:253-272
	miRNA 3' CACGAGUGAGAGAAGACAGU 5'
	| ||||||||||||||||||
	target 5' GAGCUCACUCUCUUCUGUCA 3'
44	>mdm-miR156m	MSTRG.121644.5 Chr15 11417886-11419971	score:2	range:270-289
	miRNA 3' CACGAGUGAGAGAAGACAGU 5'
	||||||||||||||||||
	target 5' CAGCUCACUCUCUUCUGUCA 3'
45	>mdm-miR156n	MSTRG.63448.2 Chr08 5220698-5222177	score:0	range:308-327
	miRNA 3' CACGAGUGAGAGAAGACAGU 5'
	||||||||||||||||||||
	target 5' GUGCUCACUCUCUUCUGUCA 3'
46	>mdm-miR156n	MSTRG.121644.8 Chr15 11433222-11434086	score:1	range:253-272
	miRNA 3' CACGAGUGAGAGAAGACAGU 5'
	| ||||||||||||||||||
	target 5' GAGCUCACUCUCUUCUGUCA 3'
47	>mdm-miR156n	MSTRG.121644.5 Chr15 11417886-11419971	score:2	range:270-289
	miRNA 3' CACGAGUGAGAGAAGACAGU 5'
	||||||||||||||||||
	target 5' CAGCUCACUCUCUUCUGUCA 3'
48	>mdm-miR156o	MSTRG.63448.2 Chr08 5220698-5222177	score:0	range:308-327
	miRNA 3' CACGAGUGAGAGAAGACAGU 5'
	||||||||||||||||||||
	target 5' GUGCUCACUCUCUUCUGUCA 3'
49	>mdm-miR156o	MSTRG.121644.8 Chr15 11433222-11434086	score:1	range:253-272
	miRNA 3' CACGAGUGAGAGAAGACAGU 5'
	| ||||||||||||||||||
	target 5' GAGCUCACUCUCUUCUGUCA 3'
50	>mdm-miR156o	MSTRG.121644.5 Chr15 11417886-11419971	score:2	range:270-289
	miRNA 3' CACGAGUGAGAGAAGACAGU 5'
	||||||||||||||||||
	target 5' CAGCUCACUCUCUUCUGUCA 3'
51	>mdm-miR156t	MSTRG.121644.8 Chr15 11433222-11434086	score:2	range:253-273
	miRNA 3' CACGAGAGAGAGAAGACAGUU 5'
	| |||| ||||||||||||||
	target 5' GAGCUCACUCUCUUCUGUCAA 3'
52	>mdm-miR156t	MSTRG.63448.2 Chr08 5220698-5222177	score:2	range:307-327
	miRNA 3' CACGAGAGAGAGAAGACAGUU 5'
	|||||| |||||||||||||
	target 5' GUGCUCACUCUCUUCUGUCAC 3'
53	>mdm-miR156t	MSTRG.121644.5 Chr15 11417886-11419971	score:3	range:270-290
	miRNA 3' CACGAGAGAGAGAAGACAGUU 5'
	|||| ||||||||||||||
	target 5' CAGCUCACUCUCUUCUGUCAA 3'
54	>mdm-miR156u	MSTRG.121644.8 Chr15 11433222-11434086	score:2	range:253-273
	miRNA 3' CACGAGAGAGAGAAGACAGUU 5'
	| |||| ||||||||||||||
	target 5' GAGCUCACUCUCUUCUGUCAA 3'
55	>mdm-miR156u	MSTRG.63448.2 Chr08 5220698-5222177	score:2	range:307-327
	miRNA 3' CACGAGAGAGAGAAGACAGUU 5'
	|||||| |||||||||||||
	target 5' GUGCUCACUCUCUUCUGUCAC 3'
56	>mdm-miR156u	MSTRG.121644.5 Chr15 11417886-11419971	score:3	range:270-290
	miRNA 3' CACGAGAGAGAGAAGACAGUU 5'
	|||| ||||||||||||||
	target 5' CAGCUCACUCUCUUCUGUCAA 3'
57	>mdm-miR156v	MSTRG.121644.8 Chr15 11433222-11434086	score:2	range:253-273
	miRNA 3' CACGAGAGAGAGAAGACAGUU 5'
	| |||| ||||||||||||||
	target 5' GAGCUCACUCUCUUCUGUCAA 3'
58	>mdm-miR156v	MSTRG.63448.2 Chr08 5220698-5222177	score:2	range:307-327
	miRNA 3' CACGAGAGAGAGAAGACAGUU 5'
	|||||| |||||||||||||
	target 5' GUGCUCACUCUCUUCUGUCAC 3'
59	>mdm-miR156v	MSTRG.121644.5 Chr15 11417886-11419971	score:3	range:270-290
	miRNA 3' CACGAGAGAGAGAAGACAGUU 5'
	|||| ||||||||||||||
	target 5' CAGCUCACUCUCUUCUGUCAA 3'
60	>mdm-miR156w	MSTRG.121644.8 Chr15 11433222-11434086	score:2	range:253-273
	miRNA 3' CACGAGAGAGAGAAGACAGUU 5'
	| |||| ||||||||||||||
	target 5' GAGCUCACUCUCUUCUGUCAA 3'
61	>mdm-miR156w	MSTRG.63448.2 Chr08 5220698-5222177	score:2	range:307-327
	miRNA 3' CACGAGAGAGAGAAGACAGUU 5'
	|||||| |||||||||||||
	target 5' GUGCUCACUCUCUUCUGUCAC 3'
62	>mdm-miR156w	MSTRG.121644.5 Chr15 11417886-11419971	score:3	range:270-290
	miRNA 3' CACGAGAGAGAGAAGACAGUU 5'
	|||| ||||||||||||||
	target 5' CAGCUCACUCUCUUCUGUCAA 3'
63	>mdm-miR156x	MSTRG.63448.2 Chr08 5220698-5222177	score:3	range:308-327
	miRNA 3' CACGAGAGAUAGAAGACAGU 5'
	|||||| || ||||||||||
	target 5' GUGCUCACUCUCUUCUGUCA 3'
64	>mdm-miR156y	MSTRG.63448.2 Chr08 5220698-5222177	score:3	range:308-327
	miRNA 3' CACGAGAGAUAGAAGACAGU 5'
	|||||| || ||||||||||
	target 5' GUGCUCACUCUCUUCUGUCA 3'
65	>mdm-miR156z	MSTRG.63448.2 Chr08 5220698-5222177	score:3	range:308-327
	miRNA 3' CACGAGAGAUAGAAGACAGU 5'
	|||||| || ||||||||||
	target 5' GUGCUCACUCUCUUCUGUCA 3'
66	>mdm-miR159a	MSTRG.9870.3 Chr01 17994967-17996896	score:3	range:262-281
	miRNA 3' CCUCGAGGGAAGUUAGGUUC 5'
	||||||||||||| |||||
	target 5' GGAGCUCCCUUCACUCCAAU 3'
67	>mdm-miR159a	MSTRG.9870.2 Chr01 17994769-17996809	score:3	range:460-479
	miRNA 3' CCUCGAGGGAAGUUAGGUUC 5'
	||||||||||||| |||||
	target 5' GGAGCUCCCUUCACUCCAAU 3'
68	>mdm-miR159b	MSTRG.9870.3 Chr01 17994967-17996896	score:3	range:262-281
	miRNA 3' CCUCGAGGGAAGUUAGGUUC 5'
	||||||||||||| |||||
	target 5' GGAGCUCCCUUCACUCCAAU 3'
69	>mdm-miR159b	MSTRG.9870.2 Chr01 17994769-17996809	score:3	range:460-479
	miRNA 3' CCUCGAGGGAAGUUAGGUUC 5'
	||||||||||||| |||||
	target 5' GGAGCUCCCUUCACUCCAAU 3'
70	>mdm-miR827	MSTRG.2929.2 Chr00 17753107-17754559	score:1.5	range:213-233
	miRNA 3' ACAAGCAACUACCAGUAGAUU 5'
	||||:|||||||||||||||
	target 5' UGUUUGUUGAUGGUCAUCUAU 3'
71	>mdm-miR395k	MSTRG.3953.2 Chr00 24518519-24520719	score:3	range:785-804
	miRNA 3' UUACUUCACAAACUCCUUUG 5'
	|:|||:||||||| ||||||
	target 5' AGUGAGGUGUUUGUGGAAAC 3'

## Sheet: Table S11-3
Table S11-3 Details of interaction between lncRNAs and miRNAs in phloem only
No.	Sequence pairs of lncRNAs and miRNAs	LncRNA_ID and location	Score	Range
1	>mdm-miR11008	MSTRG.143146.1 Chr17 17254866-17255223	score:2.5	range:13-33
	miRNA 3' AGAAGAUAAAACACGCCAGUG 5'
	||| ||:|||||||:||||||
	target 5' UCUCCUGUUUUGUGUGGUCAC 3'

## Sheet: Table S11-4
Table S11-4 Details of interactions between lncRNAs and miRNAs in leaves only
No.	Sequence pairs of lncRNAs and miRNAs	LncRNA_ID and location	Score	Range
1	>mdm-miR164a	MSTRG.142473.1 Chr17 13614971-13615468	score:0	range:175-195
	miRNA 3' CCGUACACGGGACGAAGAGGU 5'
	|||||||||||||||||||||
	target 5' GGCAUGUGCCCUGCUUCUCCA 3'
2	>mdm-miR164b	MSTRG.142473.1 Chr17 13614971-13615468	score:1.5	range:175-195
	miRNA 3' ACGUGCACGGGACGAAGAGGU 5'
	|||:||||||||||||||||
	target 5' GGCAUGUGCCCUGCUUCUCCA 3'
3	>mdm-miR164c	MSTRG.142473.1 Chr17 13614971-13615468	score:1.5	range:175-195
	miRNA 3' ACGUGCACGGGACGAAGAGGU 5'
	|||:||||||||||||||||
	target 5' GGCAUGUGCCCUGCUUCUCCA 3'
4	>mdm-miR164d	MSTRG.142473.1 Chr17 13614971-13615468	score:1.5	range:175-195
	miRNA 3' ACGUGCACGGGACGAAGAGGU 5'
	|||:||||||||||||||||
	target 5' GGCAUGUGCCCUGCUUCUCCA 3'
5	>mdm-miR164e	MSTRG.142473.1 Chr17 13614971-13615468	score:1.5	range:175-195
	miRNA 3' ACGUGCACGGGACGAAGAGGU 5'
	|||:||||||||||||||||
	target 5' GGCAUGUGCCCUGCUUCUCCA 3'
6	>mdm-miR164f	MSTRG.142473.1 Chr17 13614971-13615468	score:1.5	range:175-195
	miRNA 3' ACGUGCACGGGACGAAGAGGU 5'
	|||:||||||||||||||||
	target 5' GGCAUGUGCCCUGCUUCUCCA 3'
7	>mdm-miR167b	MSTRG.101885.1 Chr12 31272768-31275192	score:0	range:168-188
	miRNA 3' AUCUAGUACGACCGUCGAAGU 5'
	|||||||||||||||||||||
	target 5' UAGAUCAUGCUGGCAGCUUCA 3'
8	>mdm-miR167b	MSTRG.101885.1 Chr12 31272768-31275192	score:3	range:216-235
	miRNA 3' AUCUAGUACGACCGUCGAAGU 5'
	||||||||| |||:|||||||
	target 5' UAGAUCAUG-UGGUAGCUUCA 3'
9	>mdm-miR167c	MSTRG.101885.1 Chr12 31272768-31275192	score:0	range:168-188
	miRNA 3' AUCUAGUACGACCGUCGAAGU 5'
	|||||||||||||||||||||
	target 5' UAGAUCAUGCUGGCAGCUUCA 3'
10	>mdm-miR167c	MSTRG.101885.1 Chr12 31272768-31275192	score:3	range:216-235
	miRNA 3' AUCUAGUACGACCGUCGAAGU 5'
	||||||||| |||:|||||||
	target 5' UAGAUCAUG-UGGUAGCUUCA 3'
11	>mdm-miR167d	MSTRG.101885.1 Chr12 31272768-31275192	score:0	range:168-188
	miRNA 3' AUCUAGUACGACCGUCGAAGU 5'
	|||||||||||||||||||||
	target 5' UAGAUCAUGCUGGCAGCUUCA 3'
12	>mdm-miR167d	MSTRG.101885.1 Chr12 31272768-31275192	score:3	range:216-235
	miRNA 3' AUCUAGUACGACCGUCGAAGU 5'
	||||||||| |||:|||||||
	target 5' UAGAUCAUG-UGGUAGCUUCA 3'
13	>mdm-miR167e	MSTRG.101885.1 Chr12 31272768-31275192	score:0	range:168-188
	miRNA 3' AUCUAGUACGACCGUCGAAGU 5'
	|||||||||||||||||||||
	target 5' UAGAUCAUGCUGGCAGCUUCA 3'
14	>mdm-miR167e	MSTRG.101885.1 Chr12 31272768-31275192	score:3	range:216-235
	miRNA 3' AUCUAGUACGACCGUCGAAGU 5'
	||||||||| |||:|||||||
	target 5' UAGAUCAUG-UGGUAGCUUCA 3'
15	>mdm-miR167f	MSTRG.101885.1 Chr12 31272768-31275192	score:0	range:168-188
	miRNA 3' AUCUAGUACGACCGUCGAAGU 5'
	|||||||||||||||||||||
	target 5' UAGAUCAUGCUGGCAGCUUCA 3'
16	>mdm-miR167f	MSTRG.101885.1 Chr12 31272768-31275192	score:3	range:216-235
	miRNA 3' AUCUAGUACGACCGUCGAAGU 5'
	||||||||| |||:|||||||
	target 5' UAGAUCAUG-UGGUAGCUUCA 3'
17	>mdm-miR167g	MSTRG.101885.1 Chr12 31272768-31275192	score:0	range:168-188
	miRNA 3' AUCUAGUACGACCGUCGAAGU 5'
	|||||||||||||||||||||
	target 5' UAGAUCAUGCUGGCAGCUUCA 3'
18	>mdm-miR167g	MSTRG.101885.1 Chr12 31272768-31275192	score:3	range:216-235
	miRNA 3' AUCUAGUACGACCGUCGAAGU 5'
	||||||||| |||:|||||||
	target 5' UAGAUCAUG-UGGUAGCUUCA 3'
19	>mdm-miR167h	MSTRG.101885.1 Chr12 31272768-31275192	score:1	range:168-189
	miRNA 3' AUUCUAGUACGACCGUCGAAGU 5'
	| ||||||||||||||||||||
	target 5' UUAGAUCAUGCUGGCAGCUUCA 3'
20	>mdm-miR167i	MSTRG.101885.1 Chr12 31272768-31275192	score:1	range:168-189
	miRNA 3' AUUCUAGUACGACCGUCGAAGU 5'
	| ||||||||||||||||||||
	target 5' UUAGAUCAUGCUGGCAGCUUCA 3'
21	>mdm-miR167j	MSTRG.101885.1 Chr12 31272768-31275192	score:1	range:168-189
	miRNA 3' AUUCUAGUACGACCGUCGAAGU 5'
	| ||||||||||||||||||||
	target 5' UUAGAUCAUGCUGGCAGCUUCA 3'
22	>mdm-miR172a	MSTRG.24932.20 Chr03 11703476-11710289	score:0	range:5484-5503
	miRNA 3' ACGUCGUAGUAGUUCUAAGA 5'
	||||||||||||||||||||
	target 5' UGCAGCAUCAUCAAGAUUCU 3'
23	>mdm-miR172a	MSTRG.10690.6 Chr01 21716041-21719148	score:0	range:689-708
	miRNA 3' ACGUCGUAGUAGUUCUAAGA 5'
	||||||||||||||||||||
	target 5' UGCAGCAUCAUCAAGAUUCU 3'
24	>mdm-miR172a	MSTRG.10690.5 Chr01 21716041-21719148	score:0	range:689-708
	miRNA 3' ACGUCGUAGUAGUUCUAAGA 5'
	||||||||||||||||||||
	target 5' UGCAGCAUCAUCAAGAUUCU 3'
25	>mdm-miR172a	MSTRG.24932.20 Chr03 11703476-11710289	score:2	range:5539-5558
	miRNA 3' ACGUCGUAGUAGUUCUAAGA 5'
	||::|||||||||||||||
	target 5' UGUGGCAUCAUCAAGAUUCA 3'
26	>mdm-miR172a	MSTRG.10690.6 Chr01 21716041-21719148	score:3	range:609-628
	miRNA 3' ACGUCGUAGUAGUUCUAAGA 5'
	||| |||||| |||||||||
	target 5' UGCCGCAUCACCAAGAUUCU 3'
27	>mdm-miR172a	MSTRG.10690.5 Chr01 21716041-21719148	score:3	range:609-628
	miRNA 3' ACGUCGUAGUAGUUCUAAGA 5'
	||| |||||| |||||||||
	target 5' UGCCGCAUCACCAAGAUUCU 3'
28	>mdm-miR172b	MSTRG.24932.20 Chr03 11703476-11710289	score:0	range:5484-5503
	miRNA 3' ACGUCGUAGUAGUUCUAAGA 5'
	||||||||||||||||||||
	target 5' UGCAGCAUCAUCAAGAUUCU 3'
29	>mdm-miR172b	MSTRG.10690.6 Chr01 21716041-21719148	score:0	range:689-708
	miRNA 3' ACGUCGUAGUAGUUCUAAGA 5'
	||||||||||||||||||||
	target 5' UGCAGCAUCAUCAAGAUUCU 3'
30	>mdm-miR172b	MSTRG.10690.5 Chr01 21716041-21719148	score:0	range:689-708
	miRNA 3' ACGUCGUAGUAGUUCUAAGA 5'
	||||||||||||||||||||
	target 5' UGCAGCAUCAUCAAGAUUCU 3'
31	>mdm-miR172b	MSTRG.24932.20 Chr03 11703476-11710289	score:2	range:5539-5558
	miRNA 3' ACGUCGUAGUAGUUCUAAGA 5'
	||::|||||||||||||||
	target 5' UGUGGCAUCAUCAAGAUUCA 3'
32	>mdm-miR172b	MSTRG.10690.6 Chr01 21716041-21719148	score:3	range:609-628
	miRNA 3' ACGUCGUAGUAGUUCUAAGA 5'
	||| |||||| |||||||||
	target 5' UGCCGCAUCACCAAGAUUCU 3'
33	>mdm-miR172b	MSTRG.10690.5 Chr01 21716041-21719148	score:3	range:609-628
	miRNA 3' ACGUCGUAGUAGUUCUAAGA 5'
	||| |||||| |||||||||
	target 5' UGCCGCAUCACCAAGAUUCU 3'
34	>mdm-miR172c	MSTRG.24932.20 Chr03 11703476-11710289	score:0	range:5484-5503
	miRNA 3' ACGUCGUAGUAGUUCUAAGA 5'
	||||||||||||||||||||
	target 5' UGCAGCAUCAUCAAGAUUCU 3'
35	>mdm-miR172c	MSTRG.10690.6 Chr01 21716041-21719148	score:0	range:689-708
	miRNA 3' ACGUCGUAGUAGUUCUAAGA 5'
	||||||||||||||||||||
	target 5' UGCAGCAUCAUCAAGAUUCU 3'
36	>mdm-miR172c	MSTRG.10690.5 Chr01 21716041-21719148	score:0	range:689-708
	miRNA 3' ACGUCGUAGUAGUUCUAAGA 5'
	||||||||||||||||||||
	target 5' UGCAGCAUCAUCAAGAUUCU 3'
37	>mdm-miR172c	MSTRG.24932.20 Chr03 11703476-11710289	score:2	range:5539-5558
	miRNA 3' ACGUCGUAGUAGUUCUAAGA 5'
	||::|||||||||||||||
	target 5' UGUGGCAUCAUCAAGAUUCA 3'
38	>mdm-miR172c	MSTRG.10690.6 Chr01 21716041-21719148	score:3	range:609-628
	miRNA 3' ACGUCGUAGUAGUUCUAAGA 5'
	||| |||||| |||||||||
	target 5' UGCCGCAUCACCAAGAUUCU 3'
39	>mdm-miR172c	MSTRG.10690.5 Chr01 21716041-21719148	score:3	range:609-628
	miRNA 3' ACGUCGUAGUAGUUCUAAGA 5'
	||| |||||| |||||||||
	target 5' UGCCGCAUCACCAAGAUUCU 3'
40	>mdm-miR172d	MSTRG.24932.20 Chr03 11703476-11710289	score:0	range:5483-5503
	miRNA 3' UACGUCGUAGUAGUUCUAAGA 5'
	|||||||||||||||||||||
	target 5' AUGCAGCAUCAUCAAGAUUCU 3'
41	>mdm-miR172d	MSTRG.10690.6 Chr01 21716041-21719148	score:0	range:689-709
	miRNA 3' UACGUCGUAGUAGUUCUAAGA 5'
	|||||||||||||||||||||
	target 5' AUGCAGCAUCAUCAAGAUUCU 3'
42	>mdm-miR172d	MSTRG.10690.5 Chr01 21716041-21719148	score:0	range:689-709
	miRNA 3' UACGUCGUAGUAGUUCUAAGA 5'
	|||||||||||||||||||||
	target 5' AUGCAGCAUCAUCAAGAUUCU 3'
43	>mdm-miR172d	MSTRG.24932.20 Chr03 11703476-11710289	score:2.5	range:5539-5559
	miRNA 3' UACGUCGUAGUAGUUCUAAGA 5'
	:||::|||||||||||||||
	target 5' GUGUGGCAUCAUCAAGAUUCA 3'
44	>mdm-miR172e	MSTRG.24932.20 Chr03 11703476-11710289	score:0	range:5483-5503
	miRNA 3' UACGUCGUAGUAGUUCUAAGA 5'
	|||||||||||||||||||||
	target 5' AUGCAGCAUCAUCAAGAUUCU 3'
45	>mdm-miR172e	MSTRG.10690.6 Chr01 21716041-21719148	score:0	range:689-709
	miRNA 3' UACGUCGUAGUAGUUCUAAGA 5'
	|||||||||||||||||||||
	target 5' AUGCAGCAUCAUCAAGAUUCU 3'
46	>mdm-miR172e	MSTRG.10690.5 Chr01 21716041-21719148	score:0	range:689-709
	miRNA 3' UACGUCGUAGUAGUUCUAAGA 5'
	|||||||||||||||||||||
	target 5' AUGCAGCAUCAUCAAGAUUCU 3'
47	>mdm-miR172e	MSTRG.24932.20 Chr03 11703476-11710289	score:2.5	range:5539-5559
	miRNA 3' UACGUCGUAGUAGUUCUAAGA 5'
	:||::|||||||||||||||
	target 5' GUGUGGCAUCAUCAAGAUUCA 3'
48	>mdm-miR172f	MSTRG.24932.20 Chr03 11703476-11710289	score:0	range:5483-5503
	miRNA 3' UACGUCGUAGUAGUUCUAAGA 5'
	|||||||||||||||||||||
	target 5' AUGCAGCAUCAUCAAGAUUCU 3'
49	>mdm-miR172f	MSTRG.10690.6 Chr01 21716041-21719148	score:0	range:689-709
	miRNA 3' UACGUCGUAGUAGUUCUAAGA 5'
	|||||||||||||||||||||
	target 5' AUGCAGCAUCAUCAAGAUUCU 3'
50	>mdm-miR172f	MSTRG.10690.5 Chr01 21716041-21719148	score:0	range:689-709
	miRNA 3' UACGUCGUAGUAGUUCUAAGA 5'
	|||||||||||||||||||||
	target 5' AUGCAGCAUCAUCAAGAUUCU 3'
51	>mdm-miR172f	MSTRG.24932.20 Chr03 11703476-11710289	score:2.5	range:5539-5559
	miRNA 3' UACGUCGUAGUAGUUCUAAGA 5'
	:||::|||||||||||||||
	target 5' GUGUGGCAUCAUCAAGAUUCA 3'
52	>mdm-miR172g	MSTRG.24932.20 Chr03 11703476-11710289	score:0	range:5483-5503
	miRNA 3' UACGUCGUAGUAGUUCUAAGA 5'
	|||||||||||||||||||||
	target 5' AUGCAGCAUCAUCAAGAUUCU 3'
53	>mdm-miR172g	MSTRG.10690.6 Chr01 21716041-21719148	score:0	range:689-709
	miRNA 3' UACGUCGUAGUAGUUCUAAGA 5'
	|||||||||||||||||||||
	target 5' AUGCAGCAUCAUCAAGAUUCU 3'
54	>mdm-miR172g	MSTRG.10690.5 Chr01 21716041-21719148	score:0	range:689-709
	miRNA 3' UACGUCGUAGUAGUUCUAAGA 5'
	|||||||||||||||||||||
	target 5' AUGCAGCAUCAUCAAGAUUCU 3'
55	>mdm-miR172g	MSTRG.24932.20 Chr03 11703476-11710289	score:2.5	range:5539-5559
	miRNA 3' UACGUCGUAGUAGUUCUAAGA 5'
	:||::|||||||||||||||
	target 5' GUGUGGCAUCAUCAAGAUUCA 3'
56	>mdm-miR172h	MSTRG.24932.20 Chr03 11703476-11710289	score:0	range:5483-5503
	miRNA 3' UACGUCGUAGUAGUUCUAAGA 5'
	|||||||||||||||||||||
	target 5' AUGCAGCAUCAUCAAGAUUCU 3'
57	>mdm-miR172h	MSTRG.10690.6 Chr01 21716041-21719148	score:0	range:689-709
	miRNA 3' UACGUCGUAGUAGUUCUAAGA 5'
	|||||||||||||||||||||
	target 5' AUGCAGCAUCAUCAAGAUUCU 3'
58	>mdm-miR172h	MSTRG.10690.5 Chr01 21716041-21719148	score:0	range:689-709
	miRNA 3' UACGUCGUAGUAGUUCUAAGA 5'
	|||||||||||||||||||||
	target 5' AUGCAGCAUCAUCAAGAUUCU 3'
59	>mdm-miR172h	MSTRG.24932.20 Chr03 11703476-11710289	score:2.5	range:5539-5559
	miRNA 3' UACGUCGUAGUAGUUCUAAGA 5'
	:||::|||||||||||||||
	target 5' GUGUGGCAUCAUCAAGAUUCA 3'
60	>mdm-miR172i	MSTRG.24932.20 Chr03 11703476-11710289	score:0.5	range:5483-5503
	miRNA 3' UACGUCGUAGUAGUUCUAAGG 5'
	||||||||||||||||||||:
	target 5' AUGCAGCAUCAUCAAGAUUCU 3'
61	>mdm-miR172i	MSTRG.10690.6 Chr01 21716041-21719148	score:0.5	range:689-709
	miRNA 3' UACGUCGUAGUAGUUCUAAGG 5'
	||||||||||||||||||||:
	target 5' AUGCAGCAUCAUCAAGAUUCU 3'
62	>mdm-miR172i	MSTRG.10690.5 Chr01 21716041-21719148	score:0.5	range:689-709
	miRNA 3' UACGUCGUAGUAGUUCUAAGG 5'
	||||||||||||||||||||:
	target 5' AUGCAGCAUCAUCAAGAUUCU 3'
63	>mdm-miR172i	MSTRG.24932.20 Chr03 11703476-11710289	score:2.5	range:5539-5559
	miRNA 3' UACGUCGUAGUAGUUCUAAGG 5'
	:||::|||||||||||||||
	target 5' GUGUGGCAUCAUCAAGAUUCA 3'
64	>mdm-miR172j	MSTRG.24932.20 Chr03 11703476-11710289	score:0.5	range:5483-5503
	miRNA 3' UACGUCGUAGUAGUUCUAAGG 5'
	||||||||||||||||||||:
	target 5' AUGCAGCAUCAUCAAGAUUCU 3'
65	>mdm-miR172j	MSTRG.10690.6 Chr01 21716041-21719148	score:0.5	range:689-709
	miRNA 3' UACGUCGUAGUAGUUCUAAGG 5'
	||||||||||||||||||||:
	target 5' AUGCAGCAUCAUCAAGAUUCU 3'
66	>mdm-miR172j	MSTRG.10690.5 Chr01 21716041-21719148	score:0.5	range:689-709
	miRNA 3' UACGUCGUAGUAGUUCUAAGG 5'
	||||||||||||||||||||:
	target 5' AUGCAGCAUCAUCAAGAUUCU 3'
67	>mdm-miR172j	MSTRG.24932.20 Chr03 11703476-11710289	score:2.5	range:5539-5559
	miRNA 3' UACGUCGUAGUAGUUCUAAGG 5'
	:||::|||||||||||||||
	target 5' GUGUGGCAUCAUCAAGAUUCA 3'
68	>mdm-miR172k	MSTRG.24932.20 Chr03 11703476-11710289	score:0.5	range:5483-5503
	miRNA 3' UACGUCGUAGUAGUUCUAAGG 5'
	||||||||||||||||||||:
	target 5' AUGCAGCAUCAUCAAGAUUCU 3'
69	>mdm-miR172k	MSTRG.10690.6 Chr01 21716041-21719148	score:0.5	range:689-709
	miRNA 3' UACGUCGUAGUAGUUCUAAGG 5'
	||||||||||||||||||||:
	target 5' AUGCAGCAUCAUCAAGAUUCU 3'
70	>mdm-miR172k	MSTRG.10690.5 Chr01 21716041-21719148	score:0.5	range:689-709
	miRNA 3' UACGUCGUAGUAGUUCUAAGG 5'
	||||||||||||||||||||:
	target 5' AUGCAGCAUCAUCAAGAUUCU 3'
71	>mdm-miR172k	MSTRG.24932.20 Chr03 11703476-11710289	score:2.5	range:5539-5559
	miRNA 3' UACGUCGUAGUAGUUCUAAGG 5'
	:||::|||||||||||||||
	target 5' GUGUGGCAUCAUCAAGAUUCA 3'
72	>mdm-miR172l	MSTRG.24932.20 Chr03 11703476-11710289	score:1.5	range:5483-5503
	miRNA 3' GACGUCGUAGUAGUUCUAAGG 5'
	|||||||||||||||||||:
	target 5' AUGCAGCAUCAUCAAGAUUCU 3'
73	>mdm-miR172l	MSTRG.10690.6 Chr01 21716041-21719148	score:1.5	range:689-709
	miRNA 3' GACGUCGUAGUAGUUCUAAGG 5'
	|||||||||||||||||||:
	target 5' AUGCAGCAUCAUCAAGAUUCU 3'
74	>mdm-miR172l	MSTRG.10690.5 Chr01 21716041-21719148	score:1.5	range:689-709
	miRNA 3' GACGUCGUAGUAGUUCUAAGG 5'
	|||||||||||||||||||:
	target 5' AUGCAGCAUCAUCAAGAUUCU 3'
75	>mdm-miR172l	MSTRG.24932.20 Chr03 11703476-11710289	score:3	range:5539-5559
	miRNA 3' GACGUCGUAGUAGUUCUAAGG 5'
	||::|||||||||||||||
	target 5' GUGUGGCAUCAUCAAGAUUCA 3'
76	>mdm-miR172m	MSTRG.24932.20 Chr03 11703476-11710289	score:1	range:5483-5503
	miRNA 3' GACGUCGUAGUAGUUCUAAGA 5'
	||||||||||||||||||||
	target 5' AUGCAGCAUCAUCAAGAUUCU 3'
77	>mdm-miR172m	MSTRG.10690.6 Chr01 21716041-21719148	score:1	range:689-709
	miRNA 3' GACGUCGUAGUAGUUCUAAGA 5'
	||||||||||||||||||||
	target 5' AUGCAGCAUCAUCAAGAUUCU 3'
78	>mdm-miR172m	MSTRG.10690.5 Chr01 21716041-21719148	score:1	range:689-709
	miRNA 3' GACGUCGUAGUAGUUCUAAGA 5'
	||||||||||||||||||||
	target 5' AUGCAGCAUCAUCAAGAUUCU 3'
79	>mdm-miR172m	MSTRG.24932.20 Chr03 11703476-11710289	score:3	range:5539-5559
	miRNA 3' GACGUCGUAGUAGUUCUAAGA 5'
	||::|||||||||||||||
	target 5' GUGUGGCAUCAUCAAGAUUCA 3'
80	>mdm-miR172n	MSTRG.24932.20 Chr03 11703476-11710289	score:1	range:5483-5503
	miRNA 3' GACGUCGUAGUAGUUCUAAGA 5'
	||||||||||||||||||||
	target 5' AUGCAGCAUCAUCAAGAUUCU 3'
81	>mdm-miR172n	MSTRG.10690.6 Chr01 21716041-21719148	score:1	range:689-709
	miRNA 3' GACGUCGUAGUAGUUCUAAGA 5'
	||||||||||||||||||||
	target 5' AUGCAGCAUCAUCAAGAUUCU 3'
82	>mdm-miR172n	MSTRG.10690.5 Chr01 21716041-21719148	score:1	range:689-709
	miRNA 3' GACGUCGUAGUAGUUCUAAGA 5'
	||||||||||||||||||||
	target 5' AUGCAGCAUCAUCAAGAUUCU 3'
83	>mdm-miR172n	MSTRG.24932.20 Chr03 11703476-11710289	score:3	range:5539-5559
	miRNA 3' GACGUCGUAGUAGUUCUAAGA 5'
	||::|||||||||||||||
	target 5' GUGUGGCAUCAUCAAGAUUCA 3'
84	>mdm-miR172o	MSTRG.24932.20 Chr03 11703476-11710289	score:1	range:5483-5503
	miRNA 3' GACGUCGUAGUAGUUCUAAGA 5'
	||||||||||||||||||||
	target 5' AUGCAGCAUCAUCAAGAUUCU 3'
85	>mdm-miR172o	MSTRG.10690.6 Chr01 21716041-21719148	score:1	range:689-709
	miRNA 3' GACGUCGUAGUAGUUCUAAGA 5'
	||||||||||||||||||||
	target 5' AUGCAGCAUCAUCAAGAUUCU 3'
86	>mdm-miR172o	MSTRG.10690.5 Chr01 21716041-21719148	score:1	range:689-709
	miRNA 3' GACGUCGUAGUAGUUCUAAGA 5'
	||||||||||||||||||||
	target 5' AUGCAGCAUCAUCAAGAUUCU 3'
87	>mdm-miR172o	MSTRG.24932.20 Chr03 11703476-11710289	score:3	range:5539-5559
	miRNA 3' GACGUCGUAGUAGUUCUAAGA 5'
	||::|||||||||||||||
	target 5' GUGUGGCAUCAUCAAGAUUCA 3'
88	>mdm-miR395a	MSTRG.104245.2 Chr13 5417573-5418559	score:0.5	range:700-720
	miRNA 3' CUCAAGGGGGUUUGUGAAGUC 5'
	|:|||||||||||||||||||
	target 5' GGGUUCCCCCAAACACUUCAG 3'
89	>mdm-miR395b	MSTRG.104245.2 Chr13 5417573-5418559	score:0.5	range:700-720
	miRNA 3' CUCAAGGGGGUUUGUGAAGUC 5'
	|:|||||||||||||||||||
	target 5' GGGUUCCCCCAAACACUUCAG 3'
90	>mdm-miR395c	MSTRG.104245.2 Chr13 5417573-5418559	score:0.5	range:700-720
	miRNA 3' CUCAAGGGGGUUUGUGAAGUC 5'
	|:|||||||||||||||||||
	target 5' GGGUUCCCCCAAACACUUCAG 3'
91	>mdm-miR395d-3p	MSTRG.104245.2 Chr13 5417573-5418559	score:0.5	range:700-720
	miRNA 3' CUCAAGGGGGUUUGUGAAGUC 5'
	|:|||||||||||||||||||
	target 5' GGGUUCCCCCAAACACUUCAG 3'
92	>mdm-miR395e	MSTRG.104245.2 Chr13 5417573-5418559	score:0.5	range:700-720
	miRNA 3' CUCAAGGGGGUUUGUGAAGUC 5'
	|:|||||||||||||||||||
	target 5' GGGUUCCCCCAAACACUUCAG 3'
93	>mdm-miR395f	MSTRG.104245.2 Chr13 5417573-5418559	score:0.5	range:700-720
	miRNA 3' CUCAAGGGGGUUUGUGAAGUC 5'
	|:|||||||||||||||||||
	target 5' GGGUUCCCCCAAACACUUCAG 3'
94	>mdm-miR395g-3p	MSTRG.104245.2 Chr13 5417573-5418559	score:0.5	range:700-720
	miRNA 3' CUCAAGGGGGUUUGUGAAGUC 5'
	|:|||||||||||||||||||
	target 5' GGGUUCCCCCAAACACUUCAG 3'
95	>mdm-miR395h	MSTRG.104245.2 Chr13 5417573-5418559	score:0.5	range:700-720
	miRNA 3' CUCAAGGGGGUUUGUGAAGUC 5'
	|:|||||||||||||||||||
	target 5' GGGUUCCCCCAAACACUUCAG 3'
96	>mdm-miR395i-3p	MSTRG.104245.2 Chr13 5417573-5418559	score:0.5	range:700-720
	miRNA 3' CUCAAGGGGGUUUGUGAAGUC 5'
	|:|||||||||||||||||||
	target 5' GGGUUCCCCCAAACACUUCAG 3'
97	>mdm-miR5225a	MSTRG.139857.2 Chr17 3307800-3308711	score:0.5	range:543-564
	miRNA 3' CGUGGUAGAGUGGAAGCUGUCU 5'
	||:|||||||||||||||||||
	target 5' GCGCCAUCUCACCUUCGACAGA 3'
98	>mdm-miR5225b	MSTRG.139857.2 Chr17 3307800-3308711	score:0.5	range:543-564
	miRNA 3' CGUGGUAGAGUGGAAGCUGUCU 5'
	||:|||||||||||||||||||
	target 5' GCGCCAUCUCACCUUCGACAGA 3'
99	>mdm-miR11002a	MSTRG.143291.1 Chr17 18096107-18104128	score:3	range:76-96
	miRNA 3' AGUGGCGGCUUCGAGUAGGAG 5'
	|:||| ::||||||||||||:
	target 5' UUACCCUUGAAGCUCAUCCUU 3'
100	>mdm-miR11002b	MSTRG.143291.1 Chr17 18096107-18104128	score:3	range:76-96
	miRNA 3' AGUGGCGGCUUCGAGUAGGAG 5'
	|:||| ::||||||||||||:
	target 5' UUACCCUUGAAGCUCAUCCUU 3'
101	>mdm-miR11002c-3p	MSTRG.143291.1 Chr17 18096107-18104128	score:3	range:76-96
	miRNA 3' AGUGGCGGCUUCGAGUAGGAG 5'
	|:||| ::||||||||||||:
	target 5' UUACCCUUGAAGCUCAUCCUU 3'
102	>mdm-miR11007	MSTRG.88008.1 Chr11 5505916-5506644	score:1.5	range:156-175
	miRNA 3' UGCAUGGUUUUAUUAACUGCC 5'
	|:| |||||||||||||||||
	target 5' AUG-ACCAAAAUAAUUGACGG 3'
103	>mdm-miR11011a	MSTRG.28245.2 Chr03 31065792-31066605	score:3	range:539-560
	miRNA 3' UG-UACCACAAACUUACUUGAA 5'
	|| || |||||||||||||||
	target 5' ACGAUAGUGUUUGAAUGAACUC 3'
104	>mdm-miR172p	MSTRG.24932.20 Chr03 11703476-11710289	score:0	range:5483-5503
	miRNA 3' UACGUCGUAGUAGUUCUAAGA 5'
	|||||||||||||||||||||
	target 5' AUGCAGCAUCAUCAAGAUUCU 3'
105	>mdm-miR172p	MSTRG.10690.6 Chr01 21716041-21719148	score:0	range:689-709
	miRNA 3' UACGUCGUAGUAGUUCUAAGA 5'
	|||||||||||||||||||||
	target 5' AUGCAGCAUCAUCAAGAUUCU 3'
106	>mdm-miR172p	MSTRG.10690.5 Chr01 21716041-21719148	score:0	range:689-709
	miRNA 3' UACGUCGUAGUAGUUCUAAGA 5'
	|||||||||||||||||||||
	target 5' AUGCAGCAUCAUCAAGAUUCU 3'
107	>mdm-miR172p	MSTRG.24932.20 Chr03 11703476-11710289	score:2.5	range:5539-5559
	miRNA 3' UACGUCGUAGUAGUUCUAAGA 5'
	:||::|||||||||||||||
	target 5' GUGUGGCAUCAUCAAGAUUCA 3'
108	>mdm-miR395k	MSTRG.104245.2 Chr13 5417573-5418559	score:1.5	range:775-794
	miRNA 3' UUACUUCACAAACUCCUUUG 5'
	|||||:||||||||||:|||
	target 5' AAUGAGGUGUUUGAGGGAAC 3'
109	>mdm-miR395k	MSTRG.3953.5 Chr00 24518519-24520653	score:3	range:785-804
	miRNA 3' UUACUUCACAAACUCCUUUG 5'
	|:|||:||||||| ||||||
	target 5' AGUGAGGUGUUUGUGGAAAC 3'
110	>mdm-miR395k	MSTRG.104245.2 Chr13 5417573-5418559	score:3	range:702-721
	miRNA 3' UUACUUCACAAACUCCUUUG 5'
	| |||||||||||:||:|||
	target 5' ACUGAAGUGUUUGGGGGAAC 3'
111	>mdm-miR395l	MSTRG.104245.2 Chr13 5417573-5418559	score:0	range:700-720
	miRNA 3' CCCAAGGGGGUUUGUGAAGUC 5'
	|||||||||||||||||||||
	target 5' GGGUUCCCCCAAACACUUCAG 3'

## Sheet: Table S11-5
Table S11-5 Details of interactions between lncRNAs and miRNAs in flowers only
No.	Sequence pairs of lncRNAs and miRNAs	LncRNA_ID and location	Score	Range
1	>mdm-miR156aa	MSTRG.17430.4 Chr02 13244956-13245809	score:3	range:109-128
	miRNA 3' CACGAGAGAUAGAAGACAGU 5'
	|||||| || ||||||||||
	target 5' GUGCUCACUCUCUUCUGUCA 3'
2	>mdm-miR156ab	MSTRG.17430.4 Chr02 13244956-13245809	score:3	range:109-129
	miRNA 3' CACGAGAGAUAGAAGACAGUU 5'
	|||||| || |||||||||||
	target 5' GUGCUCACUCUCUUCUGUCAA 3'
3	>mdm-miR156ac	MSTRG.17430.4 Chr02 13244956-13245809	score:3	range:109-129
	miRNA 3' CACGAGAGAUAGAAGACAGUU 5'
	|||||| || |||||||||||
	target 5' GUGCUCACUCUCUUCUGUCAA 3'
4	>mdm-miR156ad	MSTRG.17430.4 Chr02 13244956-13245809	score:2	range:109-128
	miRNA 3' CACGAGUGAAAGAAGACAGU 5'
	||||||||| ||||||||||
	target 5' GUGCUCACUCUCUUCUGUCA 3'
5	>mdm-miR156ae	MSTRG.17430.4 Chr02 13244956-13245809	score:2	range:109-128
	miRNA 3' CACGAGUGAAAGAAGACAGU 5'
	||||||||| ||||||||||
	target 5' GUGCUCACUCUCUUCUGUCA 3'
6	>mdm-miR156a	MSTRG.17430.4 Chr02 13244956-13245809	score:0	range:109-128
	miRNA 3' CACGAGUGAGAGAAGACAGU 5'
	||||||||||||||||||||
	target 5' GUGCUCACUCUCUUCUGUCA 3'
7	>mdm-miR156b	MSTRG.17430.4 Chr02 13244956-13245809	score:0	range:109-128
	miRNA 3' CACGAGUGAGAGAAGACAGU 5'
	||||||||||||||||||||
	target 5' GUGCUCACUCUCUUCUGUCA 3'
8	>mdm-miR156c	MSTRG.17430.4 Chr02 13244956-13245809	score:0	range:109-128
	miRNA 3' CACGAGUGAGAGAAGACAGU 5'
	||||||||||||||||||||
	target 5' GUGCUCACUCUCUUCUGUCA 3'
9	>mdm-miR156d	MSTRG.17430.4 Chr02 13244956-13245809	score:0	range:109-128
	miRNA 3' CACGAGUGAGAGAAGACAGU 5'
	||||||||||||||||||||
	target 5' GUGCUCACUCUCUUCUGUCA 3'
10	>mdm-miR156e	MSTRG.17430.4 Chr02 13244956-13245809	score:0	range:109-128
	miRNA 3' CACGAGUGAGAGAAGACAGU 5'
	||||||||||||||||||||
	target 5' GUGCUCACUCUCUUCUGUCA 3'
11	>mdm-miR156f	MSTRG.17430.4 Chr02 13244956-13245809	score:0	range:109-128
	miRNA 3' CACGAGUGAGAGAAGACAGU 5'
	||||||||||||||||||||
	target 5' GUGCUCACUCUCUUCUGUCA 3'
12	>mdm-miR156g	MSTRG.17430.4 Chr02 13244956-13245809	score:0	range:109-128
	miRNA 3' CACGAGUGAGAGAAGACAGU 5'
	||||||||||||||||||||
	target 5' GUGCUCACUCUCUUCUGUCA 3'
13	>mdm-miR156h	MSTRG.17430.4 Chr02 13244956-13245809	score:0	range:109-128
	miRNA 3' CACGAGUGAGAGAAGACAGU 5'
	||||||||||||||||||||
	target 5' GUGCUCACUCUCUUCUGUCA 3'
14	>mdm-miR156i	MSTRG.17430.4 Chr02 13244956-13245809	score:0	range:109-128
	miRNA 3' CACGAGUGAGAGAAGACAGU 5'
	||||||||||||||||||||
	target 5' GUGCUCACUCUCUUCUGUCA 3'
15	>mdm-miR156j	MSTRG.17430.4 Chr02 13244956-13245809	score:0	range:109-128
	miRNA 3' CACGAGUGAGAGAAGACAGU 5'
	||||||||||||||||||||
	target 5' GUGCUCACUCUCUUCUGUCA 3'
16	>mdm-miR156k	MSTRG.17430.4 Chr02 13244956-13245809	score:0	range:109-128
	miRNA 3' CACGAGUGAGAGAAGACAGU 5'
	||||||||||||||||||||
	target 5' GUGCUCACUCUCUUCUGUCA 3'
17	>mdm-miR156l	MSTRG.17430.4 Chr02 13244956-13245809	score:0	range:109-128
	miRNA 3' CACGAGUGAGAGAAGACAGU 5'
	||||||||||||||||||||
	target 5' GUGCUCACUCUCUUCUGUCA 3'
18	>mdm-miR156m	MSTRG.17430.4 Chr02 13244956-13245809	score:0	range:109-128
	miRNA 3' CACGAGUGAGAGAAGACAGU 5'
	||||||||||||||||||||
	target 5' GUGCUCACUCUCUUCUGUCA 3'
19	>mdm-miR156n	MSTRG.17430.4 Chr02 13244956-13245809	score:0	range:109-128
	miRNA 3' CACGAGUGAGAGAAGACAGU 5'
	||||||||||||||||||||
	target 5' GUGCUCACUCUCUUCUGUCA 3'
20	>mdm-miR156o	MSTRG.17430.4 Chr02 13244956-13245809	score:0	range:109-128
	miRNA 3' CACGAGUGAGAGAAGACAGU 5'
	||||||||||||||||||||
	target 5' GUGCUCACUCUCUUCUGUCA 3'
21	>mdm-miR156t	MSTRG.17430.4 Chr02 13244956-13245809	score:1	range:109-129
	miRNA 3' CACGAGAGAGAGAAGACAGUU 5'
	|||||| ||||||||||||||
	target 5' GUGCUCACUCUCUUCUGUCAA 3'
22	>mdm-miR156u	MSTRG.17430.4 Chr02 13244956-13245809	score:1	range:109-129
	miRNA 3' CACGAGAGAGAGAAGACAGUU 5'
	|||||| ||||||||||||||
	target 5' GUGCUCACUCUCUUCUGUCAA 3'
23	>mdm-miR156v	MSTRG.17430.4 Chr02 13244956-13245809	score:1	range:109-129
	miRNA 3' CACGAGAGAGAGAAGACAGUU 5'
	|||||| ||||||||||||||
	target 5' GUGCUCACUCUCUUCUGUCAA 3'
24	>mdm-miR156w	MSTRG.17430.4 Chr02 13244956-13245809	score:1	range:109-129
	miRNA 3' CACGAGAGAGAGAAGACAGUU 5'
	|||||| ||||||||||||||
	target 5' GUGCUCACUCUCUUCUGUCAA 3'
25	>mdm-miR156x	MSTRG.17430.4 Chr02 13244956-13245809	score:3	range:109-128
	miRNA 3' CACGAGAGAUAGAAGACAGU 5'
	|||||| || ||||||||||
	target 5' GUGCUCACUCUCUUCUGUCA 3'
26	>mdm-miR156y	MSTRG.17430.4 Chr02 13244956-13245809	score:3	range:109-128
	miRNA 3' CACGAGAGAUAGAAGACAGU 5'
	|||||| || ||||||||||
	target 5' GUGCUCACUCUCUUCUGUCA 3'
27	>mdm-miR156z	MSTRG.17430.4 Chr02 13244956-13245809	score:3	range:109-128
	miRNA 3' CACGAGAGAUAGAAGACAGU 5'
	|||||| || ||||||||||
	target 5' GUGCUCACUCUCUUCUGUCA 3'
28	>mdm-miR160a	MSTRG.10845.2 Chr01 22254270-22257738	score:0	range:2312-2332
	miRNA 3' ACCGUAUGUCCCUCGGUCCGU 5'
	|||||||||||||||||||||
	target 5' UGGCAUACAGGGAGCCAGGCA 3'
29	>mdm-miR160b	MSTRG.10845.2 Chr01 22254270-22257738	score:0	range:2312-2332
	miRNA 3' ACCGUAUGUCCCUCGGUCCGU 5'
	|||||||||||||||||||||
	target 5' UGGCAUACAGGGAGCCAGGCA 3'
30	>mdm-miR160c	MSTRG.10845.2 Chr01 22254270-22257738	score:0	range:2312-2332
	miRNA 3' ACCGUAUGUCCCUCGGUCCGU 5'
	|||||||||||||||||||||
	target 5' UGGCAUACAGGGAGCCAGGCA 3'
31	>mdm-miR160d	MSTRG.10845.2 Chr01 22254270-22257738	score:0	range:2312-2332
	miRNA 3' ACCGUAUGUCCCUCGGUCCGU 5'
	|||||||||||||||||||||
	target 5' UGGCAUACAGGGAGCCAGGCA 3'
32	>mdm-miR160e	MSTRG.10845.2 Chr01 22254270-22257738	score:0	range:2312-2332
	miRNA 3' ACCGUAUGUCCCUCGGUCCGU 5'
	|||||||||||||||||||||
	target 5' UGGCAUACAGGGAGCCAGGCA 3'
33	>mdm-miR172a	MSTRG.28775.1 Chr03 33181417-33183796	score:3	range:456-474
	miRNA 3' ACGUCGUAGUAGUUCUAAGA 5'
	| || | |||||||||||||
	target 5' UCCAAC-UCAUCAAGAUUCU 3'
34	>mdm-miR172b	MSTRG.28775.1 Chr03 33181417-33183796	score:3	range:456-474
	miRNA 3' ACGUCGUAGUAGUUCUAAGA 5'
	| || | |||||||||||||
	target 5' UCCAAC-UCAUCAAGAUUCU 3'
35	>mdm-miR172c	MSTRG.28775.1 Chr03 33181417-33183796	score:3	range:456-474
	miRNA 3' ACGUCGUAGUAGUUCUAAGA 5'
	| || | |||||||||||||
	target 5' UCCAAC-UCAUCAAGAUUCU 3'
36	>mdm-miR172d	MSTRG.28775.1 Chr03 33181417-33183796	score:3	range:456-475
	miRNA 3' UACGUCGUAGUAGUUCUAAGA 5'
	|| || | |||||||||||||
	target 5' AUCCAAC-UCAUCAAGAUUCU 3'
37	>mdm-miR172e	MSTRG.28775.1 Chr03 33181417-33183796	score:3	range:456-475
	miRNA 3' UACGUCGUAGUAGUUCUAAGA 5'
	|| || | |||||||||||||
	target 5' AUCCAAC-UCAUCAAGAUUCU 3'
38	>mdm-miR172f	MSTRG.28775.1 Chr03 33181417-33183796	score:3	range:456-475
	miRNA 3' UACGUCGUAGUAGUUCUAAGA 5'
	|| || | |||||||||||||
	target 5' AUCCAAC-UCAUCAAGAUUCU 3'
39	>mdm-miR172g	MSTRG.28775.1 Chr03 33181417-33183796	score:3	range:456-475
	miRNA 3' UACGUCGUAGUAGUUCUAAGA 5'
	|| || | |||||||||||||
	target 5' AUCCAAC-UCAUCAAGAUUCU 3'
40	>mdm-miR172h	MSTRG.28775.1 Chr03 33181417-33183796	score:3	range:456-475
	miRNA 3' UACGUCGUAGUAGUUCUAAGA 5'
	|| || | |||||||||||||
	target 5' AUCCAAC-UCAUCAAGAUUCU 3'
41	>mdm-miR172p	MSTRG.28775.1 Chr03 33181417-33183796	score:3	range:456-475
	miRNA 3' UACGUCGUAGUAGUUCUAAGA 5'
	|| || | |||||||||||||
	target 5' AUCCAAC-UCAUCAAGAUUCU 3'

## Sheet: Table S11-6
Table S11-6 Details of interactions between lncRNAs and miRNAs in fruits only
No.	Sequence pairs of lncRNAs and miRNAs	LncRNA_ID and location	Score	Range
1	>mdm-miR393a	MSTRG.60895.2 Chr07 33794767-33796005	score:0	range:866-887
	miRNA 3' UCUAGUUACGCUAGGGAAACCU 5'
	||||||||||||||||||||||
	target 5' AGAUCAAUGCGAUCCCUUUGGA 3'
2	>mdm-miR393b	MSTRG.60895.2 Chr07 33794767-33796005	score:0	range:866-887
	miRNA 3' UCUAGUUACGCUAGGGAAACCU 5'
	||||||||||||||||||||||
	target 5' AGAUCAAUGCGAUCCCUUUGGA 3'
3	>mdm-miR393c	MSTRG.60895.2 Chr07 33794767-33796005	score:0	range:866-887
	miRNA 3' UCUAGUUACGCUAGGGAAACCU 5'
	||||||||||||||||||||||
	target 5' AGAUCAAUGCGAUCCCUUUGGA 3'
4	>mdm-miR393d	MSTRG.60895.2 Chr07 33794767-33796005	score:0	range:785-805
	miRNA 3' GCAGGCUUCCCUAGCGUACUA 5'
	|||||||||||||||||||||
	target 5' CGUCCGAAGGGAUCGCAUGAU 3'
5	>mdm-miR393e	MSTRG.60895.2 Chr07 33794767-33796005	score:0	range:785-805
	miRNA 3' GCAGGCUUCCCUAGCGUACUA 5'
	|||||||||||||||||||||
	target 5' CGUCCGAAGGGAUCGCAUGAU 3'
6	>mdm-miR393f	MSTRG.60895.2 Chr07 33794767-33796005	score:0	range:785-805
	miRNA 3' GCAGGCUUCCCUAGCGUACUA 5'
	|||||||||||||||||||||
	target 5' CGUCCGAAGGGAUCGCAUGAU 3'
7	>mdm-miR7126-3p	MSTRG.11457.2 Chr01 24470988-24472690	score:0	range:234-255
	miRNA 3' GCUUUCUUAGUCACCUUGCGUU 5'
	||||||||||||||||||||||
	target 5' CGAAAGAAUCAGUGGAACGCAA 3'
8	>mdm-miR7126-5p	MSTRG.11457.2 Chr01 24470988-24472690	score:0	range:147-167
	miRNA 3' GAAACGCGAGGAACUAUGAAA 5'
	|||||||||||||||||||||
	target 5' CUUUGCGCUCCUUGAUACUUU 3'
9	>mdm-miR10993c	MSTRG.138614.2 Chr16 38459580-38460788	score:2.5	range:493-513
	miRNA 3' UGUCCUACCAUGUGGUGUACA 5'
	||:|||||||||||||::|||
	target 5' ACGGGAUGGUACACCAUGUGU 3'
10	>mdm-miR10993d	MSTRG.138614.2 Chr16 38459580-38460788	score:2.5	range:493-513
	miRNA 3' UGUCCUACCAUGUGGUGUACA 5'
	||:|||||||||||||::|||
	target 5' ACGGGAUGGUACACCAUGUGU 3'
11	>mdm-miR10993e	MSTRG.138614.2 Chr16 38459580-38460788	score:2.5	range:493-513
	miRNA 3' UGUCCUACCAUGUGGUGUACA 5'
	||:|||||||||||||::|||
	target 5' ACGGGAUGGUACACCAUGUGU 3'
12	>mdm-miR10993f	MSTRG.138614.2 Chr16 38459580-38460788	score:2.5	range:493-513
	miRNA 3' UGUCCUACCAUGUGGUGUACA 5'
	||:|||||||||||||::|||
	target 5' ACGGGAUGGUACACCAUGUGU 3'
