# Supplementary material for: Expression Profiles and Characteristics of Apple lncRNAs in Roots, Phloem, Leaves, Flowers, and Fruit
Source: Int J Mol Sci. 2022 May 25;23(11):5931. doi: 10.3390/ijms23115931 (PMC9180697; doi:10.3390/ijms23115931)
Supplement: Supplementary file 1 [file ijms-23-05931-s001.zip › Table S12.xlsx]

## Sheet: Table S12-1
Table S12-1 List of lncRNA-miRNA-mRNA networks in all five tissues
No.	lncRNA	miRNA	mRNA	correlation coefficient	p_value	annotation
1	MSTRG.121641.3	mdm-miR156a-o, t-w	MD07G1057400	0.886118	0.0453371	DNA helicase
2		mdm-miR156aa, p-s, x-z	MD09G1010700	0.91813	0.0277727	Protein of unknown function
3		mdm-miR156ad, ae, t-w	MD16G1187000	0.890515	0.042766	Glycoprotein membrane precursor GPI-anchored
4		mdm-miR156a-o	MD10G1153600	0.95135	0.0127867	Lipase class 3 family protein
5			MD12G1176600	0.894417	0.0405253	ARM repeat superfamily protein
6			MD16G1020900	0.915989	0.0288595	Protein of unknown function
7			MD14G1066600	0.94441	0.0156017	Transducin/WD40 repeat-like superfamily protein
8	MSTRG.121641.28	mdm-miR156a-o	MD13G1259600	0.98231	0.00281693	Unknown function
9			MD06G1174200	0.876677	0.0436167	MYB domain protein 66
10	MSTRG.121644.1	mdm-miR156ad, ae	MD14G1075100	0.939165	0.0178467	Unknown function
11		mdm-miR156t-w	MD12G1238200	0.893655	0.0409596	NIMA-related kinase 2
12		mdm-miR156ad, ae	MD10G1110400	0.945731	0.0150521	F-box family protein
13	MSTRG.10845.2	mdm-miR160a-e	MD08G1098300	0.893163	0.0412414	S-ribonuclease binding protein 1
14			MD07G1174000	0.964381	0.00802653	auxin response factor 16
15	MSTRG.101885.2	mdm-miR167a	MD07G1174900	0.969537	0.00635338	myosin heavy chain-related
16			MD07G1253700	0.906734	0.033709	conserved oligomeric Golgi complex component-related / COG complex component-related
17			MD09G1193800	0.986547	0.00186929	DNA-binding bromodomain-containing protein
18		mdm-miR167hij	MD15G1288700	0.979674	0.0034681	heavy metal atpase 1
19		mdm-miR167b-g	MD16G1049000	0.935338	0.0195458	TCP domain protein 12
20	MSTRG.71519.1	mdm-miR171i	MD02G1114900	0.975569	0.00456704	WUSCHEL related homeobox 13
21			MD10G1067800	0.892122	0.0418388	beta-galactosidase 3
22		mdm-miR171f-3p, m, n	MD04G1177300	0.884122	0.0465198	nuclear shuttle interacting
23			MD12G1192400	0.881092	0.0483338	nuclear shuttle interacting
24		mdm-miR171abp	MD05G1135000	0.982307	0.00281766	Protein kinase superfamily protein
25			MD12G1165600	0.939621	0.0176479	Unknown function
26		mdm-miR171f-5p, q	MD07G1179000	0.881868	0.0478671	Pentatricopeptide repeat (PPR) superfamily protein
27		mdm-miR171gh	MD03G1021500	0.886421	0.0451588	beta glucosidase 17
28	MSTRG.58353.2	mdm-miR172m-o	MD05G1118900	0.922684	0.0255054	Pathogenesis-related thaumatin superfamily protein
29		mdm-miR172a-c, m-o	MD05G1031700	0.957127	0.0105876	cysteine-rich RLK (RECEPTOR-like protein kinase) 15
30	MSTRG.24932.13	mdm-miR172a-p	MD04G1105200	0.917381	0.0281512	related to AP2.7
31			MD12G1125900	0.978688	0.00372293	related to AP2.7
32		mdm-miR172a-c, m-o	MD10G1033200	0.953891	0.0118029	Protein kinase superfamily protein
33		mdm-miR172a-c	MD06G1090600	0.879018	0.0495874	1-aminocyclopropane-1-carboxylic acid (acc) synthase 6
34			MD15G1094300	0.916118	0.0287938	carotenoid cleavage dioxygenase 1
35		mdm-miR172l-o	MD09G1099800	0.918598	0.0275368	S-locus lectin protein kinase family protein
36		mdm-miR172l	MD09G1123400	0.886626	0.0450379	Unknown function
37		mdm-miR172a-h, l-o	MD10G1140000	0.8817	0.0479681	galacturonosyltransferase 3
38		mdm-miR172a-h, p	MD11G1094600	0.915185	0.0292713	Protein kinase superfamily protein
39	MSTRG.76051.5	mdm-miR482d	MD05G1349900	0.898601	0.0381651	Protein of unknown function
40	MSTRG.103191.1	mdm-miR482c	MD14G1074700	0.966384	0.00736111	P-loop containing nucleoside triphosphate hydrolases superfamily protein
41		mdm-miR482d	MD17G1139300	0.887695	0.0444099	MEI2-like protein 5
42	MSTRG.103191.2	mdm-miR482c	MD14G1074700	0.995406	0.000373466	P-loop containing nucleoside triphosphate hydrolases superfamily protein
43		mdm-miR482d	MD17G1139300	0.922691	0.0255023	MEI2-like protein 5
44	MSTRG.103191.4	mdm-miR482b	MD08G1094300	0.979832	0.00342787	NB-ARC domain-containing disease resistance protein
45		mdm-miR482d	MD13G1102400	0.931336	0.0213749	armadillo repeat only 4
46		mdm-miR482d	MD16G1109700	0.901056	0.0368013	Homeodomain-like superfamily protein
47		mdm-miR482c	MD17G1187000	0.972171	0.00554945	Ankyrin repeat family protein
48	MSTRG.41686.13	mdm-miR535a	MD04G1047400	0.900981	0.036843	FK506-binding protein 12
49			MD12G1120000	0.940872	0.0171053	Transducin/WD40 repeat-like superfamily protein
50		mdm-miR535bc	MD03G1149900	0.886508	0.0451073	Protein of unknown function
51			MD05G1251500	0.881169	0.0482871	peroxisome 1
52			MD06G1054100	0.909687	0.0321358	myb-like transcription factor family protein
53			MD07G1062000	0.888883	0.0437147	Nuclear transport factor 2 (NTF2) family protein
54			MD11G1251800	0.913352	0.0302166	squamosa promoter binding protein-like 4
55			MD14G1204700	0.969743	0.00628921	CCT motif -containing response regulator protein
56		mdm-miR535ad	MD09G1248800	0.9524	0.0123771	Tetratricopeptide repeat (TPR)-like superfamily protein
57			MD13G1167700	0.970999	0.00590277	P-loop containing nucleoside triphosphate hydrolases superfamily protein
58		mdm-miR535d	MD10G1191800	0.890538	0.0427528	DREB2A-interacting protein 2
59			MD10G1297300	0.891578	0.042152	Disease resistance protein (TIR-NBS-LRR class) family
60			MD15G1231200	0.974913	0.00475198	Transducin/WD40 repeat-like superfamily protein
61	MSTRG.122315.1	mdm-miR10995	MD00G1023400	0.901411	0.0366056	Unknown function
62			MD02G1166300	0.952922	0.0121749	Disease resistance protein (CC-NBS-LRR class) family
63	MSTRG.111591.2		MD05G1029500	0.916	0.0288541	Protein of unknown function
64	MSTRG.25801.1		MD05G1029500	0.957032	0.0106227	Protein of unknown function
65	MSTRG.111591.2		MD05G1020200	0.931933	0.0210985	Regulator of chromosome condensation (RCC1) family with FYVE zinc finger domain
66			MD07G1290200	0.901342	0.0366438	Protein of unknown function
67			MD08G1164400	0.905422	0.0344161	FAR1-related sequence 5
68			MD10G1257300	0.926934	0.0234472	Early-responsive to dehydration stress protein (ERD4)
69			MD10G1264300	0.930623	0.0217061	HMG-box (high mobility group) DNA-binding family protein
70			MD07G1262800	0.926718	0.0235504	valyl-tRNA synthetase / valine--tRNA ligase (VALRS)
71			MD01G1001600	0.925276	0.0242435	actin 7
72	MSTRG.25801.1		MD05G1020200	0.938352	0.0182035	Regulator of chromosome condensation (RCC1) family with FYVE zinc finger domain
73			MD07G1290200	0.982109	0.00286496	Protein of unknown function
74			MD08G1164400	0.982689	0.00272698	FAR1-related sequence 5
75			MD10G1257300	0.902035	0.0362623	Early-responsive to dehydration stress protein (ERD4)
76			MD10G1264300	0.979246	0.00357781	HMG-box (high mobility group) DNA-binding family protein
77			MD07G1262800	0.935699	0.0193833	valyl-tRNA synthetase / valine--tRNA ligase (VALRS)
78			MD01G1001600	0.942654	0.0163425	actin 7
79	MSTRG.111591.2		MD02G1165400	0.917174	0.028256	Disease resistance protein (CC-NBS-LRR class) family
80			MD02G1165500	0.922727	0.0254848	Disease resistance protein (CC-NBS-LRR class) family
81			MD04G1196000	0.912256	0.0307863	importin alpha isoform 1
82			MD05G1026500	0.908975	0.0325126	Ankyrin repeat family protein
83			MD05G1203200	0.878623	0.0498274	Protein of unknown function
84			MD06G1114800	0.919997	0.0268356	with no lysine (K) kinase 8
85			MD07G1186500	0.891779	0.0420362	Protein of unknown function
86			MD07G1233900	0.885778	0.0455379	Leucine-rich repeat protein kinase family protein
87			MD08G1175900	0.898174	0.0384037	Disease resistance protein (TIR-NBS-LRR class) family
88			MD10G1002500	0.978074	0.00388461	Sucrose-phosphate synthase family protein
89			MD12G1208700	0.905005	0.0346416	importin alpha isoform 1
90			MD13G1157000	0.922728	0.0254841	Protein of unknown function
91	MSTRG.25801.1		MD02G1165400	0.967059	0.00714134	Disease resistance protein (CC-NBS-LRR class) family
92			MD02G1165500	0.957265	0.0105368	Disease resistance protein (CC-NBS-LRR class) family
93			MD04G1196000	0.974295	0.00492807	importin alpha isoform 1
94			MD05G1026500	0.917183	0.0282514	Ankyrin repeat family protein
95			MD05G1203200	0.990431	0.001122	Protein of unknown function
96			MD06G1114800	0.956921	0.0106636	with no lysine (K) kinase 8
97			MD07G1186500	0.986225	0.00193669	Protein of unknown function
98			MD07G1233900	0.985988	0.00198696	Leucine-rich repeat protein kinase family protein
99			MD08G1175900	0.963823	0.00821507	Disease resistance protein (TIR-NBS-LRR class) family
100			MD10G1002500	0.936187	0.0191645	Sucrose-phosphate synthase family protein
101			MD12G1208700	0.980724	0.00320329	importin alpha isoform 1
102			MD13G1157000	0.975729	0.00452257	Protein of unknown function
103	MSTRG.88802.2		MD02G1165400	0.880409	0.0487451	Disease resistance protein (CC-NBS-LRR class) family
104			MD02G1165500	0.883284	0.0470192	Disease resistance protein (CC-NBS-LRR class) family
105			MD04G1196000	0.890177	0.0429622	importin alpha isoform 1
106			MD05G1026500	0.988914	0.00139883	Ankyrin repeat family protein
107			MD05G1203200	0.901477	0.0365693	Protein of unknown function
108			MD06G1114800	0.887106	0.0447553	with no lysine (K) kinase 8
109			MD07G1186500	0.893145	0.0412514	Protein of unknown function
110			MD07G1233900	0.88835	0.0440265	Leucine-rich repeat protein kinase family protein
111			MD08G1175900	0.883801	0.0467112	Disease resistance protein (TIR-NBS-LRR class) family
112			MD10G1002500	0.909348	0.032315	Sucrose-phosphate synthase family protein
113			MD12G1208700	0.887689	0.0444133	importin alpha isoform 1
114			MD13G1157000	0.894779	0.040319	Protein of unknown function
115	MSTRG.25801.1		MD13G1130300	0.966851	0.00720884	MEI2-like protein 1
116			MD14G1112500	0.96849	0.00668272	Calcineurin-like metallo-phosphoesterase superfamily protein
117			MD14G1112900	0.971741	0.00567824	Calcineurin-like metallo-phosphoesterase superfamily protein
118	MSTRG.110261.3	mdm-miR11002a, b, c-3p	MD11G1238600	0.93667	0.0189486	Late embryogenesis abundant (LEA) protein-related
119	MSTRG.134000.2	mdm-miR11004	MD10G1054400	0.902509	0.0360018	basic helix-loop-helix (bHLH) DNA-binding superfamily protein
120	MSTRG.44682.4	mdm-miR11007	MD05G1252400	0.938968	0.017933	Glutathione S-transferase family protein
121	MSTRG.59035.2	mdm-miR11008	MD10G1283200	0.993847	0.000578857	GDSL-like Lipase/Acylhydrolase superfamily protein
122	MSTRG.84298.6		MD13G1225100	0.920737	0.0264674	Major facilitator superfamily protein
123			MD16G1062300	0.901514	0.036549	Unknown function
124			MD16G1126200	0.914424	0.0296626	hydroxyproline-rich glycoprotein family protein
125	MSTRG.84298.8		MD13G1225100	0.952012	0.0125281	Major facilitator superfamily protein
126			MD16G1062300	0.922695	0.0255003	Unknown function
127			MD16G1126200	0.918116	0.0277794	hydroxyproline-rich glycoprotein family protein

## Sheet: Table S12-2
Table S12-2 List of lncRNA-miRNA-mRNA networks in floweres only
No.	lncRNA	miRNA	mRNA	correlation coefficient	p_value	annotation
1	MSTRG.17430.4	mdm-miR156aa, ad, ae, a-o, x-z	MD04G1128800	0.999721	5.58965e-06	Protein of unknown function (DUF3741)
2			MD05G1058800	0.92015	0.0267592	Papain family cysteine protease
3			MD08G1126200	0.953576	0.0119233	Cellulose-synthase-like C5
4		mdm-miR156aa, ad, ae, x-z	MD15G1402700	0.985032	0.00219342	12-oxophytodienoate reductase 2
5			MD15G1402800	0.967876	0.00687818	12-oxophytodienoate reductase 2
6		mdm-miR156aa, a-o, t-z	MD02G1095500	0.999933	6.55523e-07	Leucine-rich repeat protein kinase family protein
7			MD08G1008400	0.947957	0.0141402	DC1 domain-containing protein
8		mdm-miR156aa, x-z	MD01G1223400	0.973385	0.0051915	ARM repeat superfamily protein
9			MD01G1229700	0.999954	3.73038e-07	Heavy metal transport/detoxification superfamily protein
10			MD10G1240300	0.992856	0.000724005	Glycosyl hydrolases family 31 protein
11			MD10G1260300	0.970001	0.00620898	RNA-binding KH domain-containing protein
12			MD15G1262700	0.994824	0.000446706	Unknown function
13			MD07G1294100	0.963122	0.00845412	ARM repeat superfamily protein
14			MD06G1112600	0.899681	0.0375632	ARM repeat superfamily protein
15			MD07G1064200	0.96415	0.00810424	alpha/beta-Hydrolases superfamily protein
16		mdm-miR156aa-ac	MD01G1080500	0.992739	0.000741939	Tetratricopeptide repeat (TPR)-like superfamily protein
17		mdm-miR156aa-ac, x-z	MD04G1049100	0.959693	0.00965522	selenoprotein family protein
18			MD05G1222500	0.924349	0.0246927	Cyclin family protein
19			MD05G1274700	0.997185	0.000179206	amino acid transporter 1
20			MD07G1272900	0.948612	0.0138755	cleavage and polyadenylation specificity factor 100
21			MD15G1216200	0.895352	0.0399938	oxophytodienoate-reductase 3
22			MD05G1124800	0.961293	0.0090884	Protein of unknown function (DUF616)
23			MD15G1249000	0.954886	0.0114248	Protein of unknown function
24		mdm-miR156aa-ae, a-o, t-z	MD03G1230600	0.994113	0.00054177	squamosa promoter binding protein-like 5
25			MD05G1197800	0.87904	0.049574	Protein of unknown function
26			MD04G1053100	0.944765	0.0154534	Protein kinase superfamily protein
27			MD06G1138800	0.919657	0.0270053	Squamosa promoter-binding protein-like (SBP domain) transcription factor family protein
28		mdm-miR156ab, ac	MD08G1113600	0.948074	0.014093	Protein of unknown function (DUF810)
29			MD11G1224500	0.995821	0.0003241	Ypt/Rab-GAP domain of gyp1p superfamily protein
30			MD03G1280000	0.882748	0.0473394	NB-ARC domain-containing disease resistance protein
31		mdm-miR156ab, ac, a-o	MD09G1128300	0.982123	0.0028615	Protein kinase superfamily protein
32		mdm-miR156ab, ac, x-z	MD12G1115600	0.909913	0.0320163	TRF-like 8
33			MD05G1274900	0.930241	0.0218845	amino acid transporter 1
34		mdm-miR156ab-ae, t-w	MD04G1167600	0.996284	0.000271774	Uncharacterised protein family (UPF0497)
35		mdm-miR156ad, ae	MD05G1115300	0.915181	0.0292734	Protein of unknown function
36			MD04G1196300	0.985939	0.00199729	RING/U-box protein
37			MD03G1216600	0.999029	3.63416e-05	Transducin/WD40 repeat-like superfamily protein
38			MD04G1034000	0.925054	0.0243509	Protein of unknown function
39			MD01G1074500	0.999766	4.30622e-06	Protein of unknown function (DUF1191)
40			MD05G1219300	0.951684	0.0126559	BTB/POZ domain-containing protein
41			MD06G1184500	0.993844	0.000579205	Dynein light chain type 1 family protein
42			MD07G1109200	0.920545	0.0265628	GRAM domain family protein
43			MD06G1231400	0.89411	0.0406998	Protein kinase superfamily protein
44			MD11G1183800	0.97962	0.00348192	early nodulin-like protein 18
45			MD08G1085800	0.911477	0.0311938	interferon-related developmental regulator family protein / IFRD protein family
46			MD10G1058200	0.995022	0.000421318	K+ efflux antiporter 3
47			MD06G1236600	0.963416	0.00835342	RNA-binding (RRM/RBD/RNP motifs) family protein
48			MD10G1169100	0.999606	9.39811e-06	Pectin lyase-like superfamily protein
49			MD10G1254600	0.974544	0.00485679	Phototropic-responsive NPH3 family protein
50			MD11G1045800	0.896455	0.03937	Transducin/WD40 repeat-like superfamily protein
51			MD11G1210300	0.898743	0.0380856	EPS15 homology domain 1
52			MD11G1212700	0.987136	0.00174806	Alpha amylase family protein
53			MD12G1209300	0.974974	0.0047345	RING/U-box protein
54			MD13G1245000	0.94903	0.0137073	S-adenosyl-L-methionine-dependent methyltransferases superfamily protein
55			MD15G1062100	0.955424	0.0112216	3'-5' exonuclease domain-containing protein / K homology domain-containing protein / KH domain-containing protein
56			MD14G1039100	0.914549	0.0295981	UDP-Glycosyltransferase superfamily protein
57			MD14G1071500	0.972143	0.00555783	Unknown function
58			MD06G1082900	0.907054	0.0335375	bromo-adjacent homology (BAH) domain-containing protein
59			MD06G1179100	0.892181	0.0418047	Unknown function
60			MD11G1289500	0.937275	0.0186794	ERD (early-responsive to dehydration stress) family protein
61			MD08G1065700	0.97817	0.00385907	S-adenosyl-L-methionine-dependent methyltransferases superfamily protein
62			MD08G1160900	0.917769	0.0279546	2-oxoglutarate (2OG) and Fe(II)-dependent oxygenase superfamily protein
63			MD09G1075600	0.967957	0.00685229	auxin transport protein (BIG)
64			MD09G1223800	0.956126	0.0109589	Domain of unknown function (DUF298)
65			MD13G1148100	0.919998	0.026835	ubiquitin protein ligase 6
66			MD13G1160000	0.979185	0.00359371	Drought-responsive family protein
67			MD13G1271200	0.895641	0.0398299	RNA binding
68			MD16G1227200	0.998548	6.64241e-05	isopropyl malate isomerase large subunit 1
69			MD00G1072300	0.97236	0.00549315	Pre-mRNA-processing-splicing factor
70			MD16G1009400	0.915852	0.0289293	SNF2 domain-containing protein / helicase domain-containing protein
71			MD16G1163000	0.930861	0.0215956	Tetratricopeptide repeat (TPR)-like superfamily protein
72			MD04G1230000	0.907908	0.0330805	Methyltransferase family protein
73		mdm-miR156ad, ae, a-o	MD05G1275200	0.965977	0.00749503	Phototropic-responsive NPH3 family protein
74			MD08G1013300	0.988765	0.00142709	Protein of unknown function
75		mdm-miR156ad, ae, a-o, t-w	MD03G1040600	0.965619	0.00761297	proteasome activating protein 200
76			MD00G1206400	0.980714	0.00320589	proteasome activating protein 200
77		mdm-miR156ad, ae, t-w	MD11G1042000	0.963625	0.00828236	proteasome activating protein 200
78			MD07G1297500	0.958482	0.0100918	Calcium-dependent protein kinase (CDPK) family protein
79		mdm-miR156a-o	MD07G1023500	0.989479	0.00129334	lipase 1
80			MD07G1048000	0.91777	0.0279543	Mitochondrial transcription termination factor family protein
81			MD09G1168900	0.981831	0.00293194	Major facilitator superfamily protein
82			MD09G1263800	0.951402	0.0127666	senescence-associated family protein
83			MD10G1044300	0.978452	0.00378467	Exostosin family protein
84			MD10G1156600	0.985184	0.00216007	O-Glycosyl hydrolases family 17 protein
85			MD12G1142100	0.984974	0.00220601	proteolysis 6
86			MD08G1147100	0.998476	7.13904e-05	Basic-leucine zipper (bZIP) transcription factor family protein
87			MD11G1306700	0.99286	0.000723403	RELA/SPOT homolog 1
88			MD12G1106200	0.945562	0.015122	transducin family protein / WD-40 repeat family protein
89			MD16G1148700	0.994667	0.000467145	Unknown function
90			MD04G1021500	0.905679	0.0342769	Pentatricopeptide repeat (PPR) superfamily protein
91			MD05G1116500	0.922871	0.0254137	Protein of unknown function (DUF3414)
92			MD05G1207000	0.997591	0.000141913	Arabidopsis thaliana gibberellin 2-oxidase 1
93			MD03G1149600	0.957569	0.0104249	decapping 1
94			MD04G1127600	0.999192	2.7551e-05	Pectinacetylesterase family protein
95			MD04G1129300	0.979141	0.003605	proteolysis 6
96			MD04G1241300	0.996793	0.000217913	Major facilitator superfamily protein
97			MD05G1123400	0.944058	0.0157495	PAM domain (PCI/PINT associated module) protein
98			MD05G1163900	0.926321	0.0237408	lipase class 3 family protein
99		mdm-miR156a-o, t-w	MD04G1167100	0.999158	2.93511e-05	Protein phosphatase 2C family protein
100			MD03G1119800	0.958119	0.0102237	GATA transcription factor 11
101			MD05G1322900	0.910421	0.0317481	bromodomain 4
102			MD15G1045600	0.995111	0.000410098	NAD(P)-binding Rossmann-fold superfamily protein
103			MD09G1049400	0.998091	0.000100086	ATP binding cassette subfamily B19
104			MD11G1019600	0.92662	0.0235974	Emsy N Terminus (ENT)/ plant Tudor-like domains-containing protein
105		mdm-miR156t-w	MD10G1335000	0.88687	0.0448944	Auxin-responsive family protein
106			MD02G1091300	0.957384	0.0104929	Protein of unknown function
107			MD06G1222100	0.953856	0.0118162	Protein of unknown function
108			MD15G1202300	0.932384	0.0208905	Insulinase (Peptidase family M16) protein
109			MD15G1029000	0.921453	0.0261124	Phospholipid/glycerol acyltransferase family protein
110			MD07G1122000	0.943778	0.015867	N-terminal nucleophile aminohydrolases (Ntn hydrolases) superfamily protein
111			MD15G1217500	0.920028	0.0268202	Protein of unknown function
112			MD04G1212100	0.998894	4.41706e-05	histidine-containing phosphotransmitter 1
113			MD02G1098900	0.973096	0.00527587	ARM repeat superfamily protein
114			MD11G1155100	0.969411	0.00639262	PHD finger family protein
115	MSTRG.28775.1	mdm-miR172a-c	MD01G1110000	0.913384	0.0302001	CCCH-type zinc fingerfamily protein with RNA-binding domain
116			MD01G1122700	0.930499	0.0217642	RAB GTPase homolog 8
117			MD01G1171100	0.995245	0.000393336	Ribosomal protein L16p/L10e family protein
118			MD02G1078000	0.887739	0.0443838	cyclic nucleotide gated channel 1
119			MD02G1313300	0.91479	0.0294739	ARM repeat superfamily protein
120			MD05G1134900	0.971034	0.00589221	galacturonosyltransferase 3
121			MD05G1160200	0.996935	0.000203626	Protein of unknown function
122			MD05G1316500	0.965468	0.00766302	C-terminal domain phosphatase-like 1
123			MD05G1351400	0.985534	0.00208405	ERD (early-responsive to dehydration stress) family protein
124			MD07G1006400	0.917539	0.028071	basic helix-loop-helix (bHLH) DNA-binding superfamily protein
125			MD07G1054600	0.976196	0.00439298	EAP30/Vps36 family protein
126			MD07G1127000	0.97992	0.00340539	shaggy-like protein kinase 32
127			MD07G1237500	0.997645	0.000137167	Ribosomal protein L16p/L10e family protein
128			MD08G1198800	0.927267	0.023288	Tetratricopeptide repeat (TPR)-like superfamily protein
129			MD08G1238200	0.992044	0.000850881	serine carboxypeptidase-like 45
130			MD09G1249000	0.907903	0.0330834	Protein of unknown function
131			MD09G1259000	0.998117	9.80698e-05	HhH-GPD base excision DNA repair family protein
132			MD09G1259100	0.998389	7.75687e-05	HhH-GPD base excision DNA repair family protein
133			MD10G1032800	0.956456	0.0108359	DHHC-type zinc finger family protein
134			MD10G1077600	0.999141	3.02256e-05	Protein kinase superfamily protein
135			MD15G1140500	0.98856	0.00146626	ferric reduction oxidase 7
136		mdm-miR172a-h, p	MD01G1027800	0.997099	0.000187519	Major facilitator superfamily protein
137			MD01G1188200	0.999987	5.58837e-08	cytochrome P450
138			MD03G1044300	0.938323	0.0182163	chloride channel F
139			MD03G1185900	0.99998	1.03655e-07	S-locus lectin protein kinase family protein
140			MD05G1073000	0.97507	0.0047074	Phox-associated domain
141			MD05G1137400	0.889885	0.0431318	disease resistance protein (TIR-NBS-LRR class)
142			MD05G1297500	0.953257	0.0120459	Protein kinase superfamily protein
143			MD05G1349800	0.960008	0.00954259	WRKY family transcription factor
144			MD06G1007000	0.948928	0.0137485	inositol requiring 1-1
145			MD06G1209500	0.908812	0.0325996	P-loop containing nucleoside triphosphate hydrolases superfamily protein
146			MD08G1031700	0.995786	0.000328206	CBS domain-containing protein with a domain of unknown function (DUF21)
147			MD08G1047000	0.989131	0.00135799	Protein of unknown function (DUF1350)
148			MD08G1241700	0.906414	0.0338813	evolutionarily conserved C-terminal region 11
149			MD09G1156500	0.977517	0.00403319	vacuolar ATP synthase subunit D (VATD) / V-ATPase D subunit / vacuolar proton pump D subunit (VATPD)
150			MD09G1190100	0.944063	0.0157472	casein kinase 1-like protein 2
151			MD09G1215200	0.949908	0.0133566	tetratricopeptide repeat (TPR)-containing protein
152			MD10G1087600	0.965388	0.00768974	Phox-associated domain
153			MD10G1174100	0.961622	0.00897294	GroES-like zinc-binding dehydrogenase family protein
154			MD10G1195800	0.964384	0.00802547	Nucleotide/sugar transporter family protein
155			MD10G1324500	0.934973	0.0197101	WRKY family transcription factor
156			MD10G1339300	0.957466	0.0104629	binding
157			MD12G1008000	0.934171	0.0200736	MIF4G domain-containing protein / MA3 domain-containing protein
158			MD12G1193800	0.890486	0.0427832	Protein of unknown function
159			MD13G1046700	0.935308	0.0195592	GC-rich sequence DNA-binding factor-like protein
160			MD14G1225600	0.961242	0.00910614	protein phosphatase 2A subunit A2
161			MD15G1014600	0.99577	0.000330016	Zinc finger C-x8-C-x5-C-x3-H type family protein
162			MD15G1088800	0.950867	0.0129767	KH domain-containing protein
163			MD15G1286400	0.945514	0.0151419	Integrase-type DNA-binding superfamily protein
164			MD15G1367300	0.993449	0.000635804	annexin 1
165		mdm-miR172d-h, p	MD06G1118000	0.936342	0.0190951	YELLOW STRIPE like 1
166			MD15G1443600	0.986509	0.00187721	EMBRYO DEFECTIVE 140

## Sheet: Table S12-3
Table S12-3 List of lncRNA-miRNA-mRNA networks in leaves only
No.	lncRNA	miRNA	mRNA	correlation coefficient	p_value	annotation
1	MSTRG.121644.3	mdm-miR156a-o	MD10G1306700	0.959689	0.00965679	S-locus lectin protein kinase family protein
2			MD15G1114000	0.988997	0.00138313	Leucine-rich repeat (LRR) family protein
3			MD15G1210600	0.926557	0.0236274	Unknown function
4		mdm-miR156t-w	MD16G1012200	0.99322	0.000669459	Unknown function
5			MD17G1133100	0.88367	0.0467891	Unknown function
6		mdm-miR156a-o, t-w	MD16G1120300	0.917245	0.0282199	squamosa promoter binding protein-like 2
7			MD12G1208200	0.913668	0.0300531	Protein of unknown function
8			MD13G1255000	0.947331	0.0143949	Unknown function
9			MD17G1236000	0.959247	0.00981518	squamosa promoter binding protein-like 4
10			MD15G1200200	0.891745	0.0420557	NAC domain containing protein 75
11			MD16G1186300	0.973288	0.00521983	Plant protein of unknown function (DUF828)
12			MD17G1154900	0.968204	0.00677357	Protein of unknown function
13	MSTRG.142473.1	mdm-miR164b-f	MD12G1158900	0.891793	0.0420281	Nucleotide-sugar transporter family protein
14		mdm-miR164a-f	MD11G1253500	0.886442	0.0451459	NAC (No Apical Meristem) domain transcriptional regulator superfamily protein
15		mdm-miR164a	MD10G1265700	0.989192	0.00134668	purine permease 10
16	MSTRG.10690.5 MSTRG.10690.6 MSTRG.24932.20	mdm-miR172a-h, l-p	MD17G1072500	0.99995	4.19597e-07	Disease resistance protein (TIR-NBS-LRR class) family
17			MD14G1243300	0.982582	0.00275224	homeodomain GLABROUS 11
18		mdm-miR172i-k	MD17G1156000	0.999548	1.15376e-05	Unknown function
19		mdm-miR172a-c, m-o	MD12G1213900	0.989583	0.0012742	Protein of unknown function
20		mdm-miR172a-p	MD10G1202800	0.999334	2.06474e-05	S-locus lectin protein kinase family protein
21			MD05G1232400	0.999082	3.33866e-05	S-locus lectin protein kinase family protein
22			MD10G1188100	0.999257	2.43333e-05	C2H2 and C2HC zinc fingers superfamily protein
23			MD09G1099700	0.953027	0.0121345	S-locus lectin protein kinase family protein
24		mdm-miR172a-c, l-o	MD05G1263100	0.993286	0.000659681	S-locus lectin protein kinase family protein
25		mdm-miR172a-k, p	MD05G1295700	0.997476	0.000152159	WRKY DNA-binding protein 65
26		mdm-miR172a-h, l-p	MD07G1002200	0.947632	0.0142722	Unknown function
27		mdm-miR172a-c	MD07G1038500	0.91017	0.0318806	response regulator 9
28			MD10G1153400	0.90341	0.0355091	receptor-like protein kinase-related family protein
29		mdm-miR172a-h, p	MD07G1070400	0.986306	0.00191975	Protein kinase superfamily protein
30	MSTRG.143291.1	mdm-miR11002a, b, c-3p	MD11G1238600	0.999973	1.72246e-07	Late embryogenesis abundant (LEA) protein-related
31			MD14G1036000	0.900357	0.0371881	Protein of unknown function
32	MSTRG.28245.2	mdm-miR11011a	MD10G1131200	0.989683	0.00125601	disease resistance protein (TIR-NBS-LRR class)
33			MD17G1274200	0.978964	0.00365098	Disease resistance protein (TIR-NBS-LRR class) family

## Sheet: Table S12-4
Table S12-4 List of lncRNA-miRNA-mRNA networks in roots only
No.	lncRNA	miRNA	mRNA	correlation coefficient	p_value	annotation
1	MSTRG.121644.8	mdm-miR156ad, ae	MD15G1250000	0.944452	0.0155844	Leucine-rich repeat (LRR) family protein
2			MD17G1014600	0.968295	0.00674436	Leucine-rich repeat protein kinase family protein
3			MD05G1331000	0.999739	5.05742e-06	S-locus lectin protein kinase family protein
4			MD12G1078400	0.992221	0.000822683	DNA binding with one finger 2.4
5		mdm-miR156t-w	MD15G1285800	0.993479	0.000631579	PLC-like phosphodiesterases superfamily protein
6		mdm-miR156a-o, t-w	MD09G1019800	0.955192	0.0113092	CCT motif family protein
7		mdm-miR156ad, ae, a-o, t-w	MD07G1111600	0.894196	0.0406509	squamosa promoter-like 11
8			MD11G1030800	0.881353	0.0481764	Unknown function
9		mdm-miR156a-o	MD05G1331300	0.966464	0.00733516	S-locus lectin protein kinase family protein
10			MD12G1155800	0.97055	0.00604003	Ctr copper transporter family
11			MD17G1269300	0.96203	0.00883087	receptor-like kinase 1
12			MD17G1278900	0.943952	0.0157938	Chloroplast J-like domain 1
13			MD17G1284000	0.997782	0.000125372	Protein of unknown function
14	MSTRG.63448.2	mdm-miR156ad, ae	MD15G1250000	0.944452	0.0155844	Leucine-rich repeat (LRR) family protein
15			MD17G1014600	0.968295	0.00674436	Leucine-rich repeat protein kinase family protein
16			MD05G1331000	0.999739	5.05742e-06	S-locus lectin protein kinase family protein
17			MD12G1078400	0.992221	0.000822683	DNA binding with one finger 2.4
18		mdm-miR156t-w	MD15G1285800	0.993479	0.000631579	PLC-like phosphodiesterases superfamily protein
19		mdm-miR156aa, ad, ae, a-o, t-z	MD07G1111600	0.894196	0.0406509	squamosa promoter-like 11
20		mdm-miR156aa, a-o, t-z	MD09G1019800	0.955192	0.0113092	CCT motif family protein
21		mdm-miR156ad, ae, a-o, t-z	MD11G1030800	0.881353	0.0481764	Unknown function
22		mdm-miR156aa, x-z	MD11G1063800	0.929659	0.022157	NAD(P)-binding Rossmann-fold superfamily protein
23			MD13G1251000	0.992003	0.000857368	lectin protein kinase family protein
24			MD14G1197300	0.987429	0.00168881	Galactose oxidase/kelch repeat superfamily protein
25			MD15G1099900	0.977408	0.0040624	Protein of unknown function
26		mdm-miR156a-o	MD05G1331300	0.966464	0.00733516	S-locus lectin protein kinase family protein
27			MD12G1155800	0.97055	0.00604003	Ctr copper transporter family
28			MD17G1269300	0.96203	0.00883087	receptor-like kinase 1
29			MD17G1278900	0.943952	0.0157938	Chloroplast J-like domain 1
30			MD17G1284000	0.997782	0.000125372	Protein of unknown function
31	MSTRG.121644.5	mdm-miR156a-o, t-w	MD07G1111600	0.894196	0.0406509	squamosa promoter-like 11
32			MD09G1019800	0.955192	0.0113092	CCT motif family protein
33			MD11G1030800	0.881353	0.0481764	Unknown function
34		mdm-miR156x-z	MD11G1063800	0.929659	0.022157	NAD(P)-binding Rossmann-fold superfamily protein
35		mdm-miR156a-o	MD05G1331300	0.966464	0.00733516	S-locus lectin protein kinase family protein
36			MD12G1155800	0.97055	0.00604003	Ctr copper transporter family
37			MD17G1269300	0.96203	0.00883087	receptor-like kinase 1
38			MD17G1278900	0.943952	0.0157938	Chloroplast J-like domain 1
39			MD17G1284000	0.997782	0.000125372	Protein of unknown function
40		mdm-miR156t-w	MD15G1285800	0.993479	0.000631579	PLC-like phosphodiesterases superfamily protein
41	MSTRG.9870.2	mdm-miR159a, b	MD01G1178100	0.986311	0.00191871	myb-like HTH transcriptional regulator family protein
42			MD04G1069600	0.991834	0.000884817	phospholipase D beta 1
43			MD09G1232700	0.947554	0.0143039	TCP family transcription factor 4
44			MD11G1053300	0.982579	0.00275295	Unknown function
45			MD13G1007200	0.980717	0.00320504	S-adenosyl-L-methionine-dependent methyltransferases superfamily protein
46	MSTRG.9870.3	mdm-miR159a, b	MD01G1178100	0.986311	0.00191871	myb-like HTH transcriptional regulator family protein
47			MD04G1069600	0.991834	0.000884817	phospholipase D beta 1
48			MD09G1232700	0.947554	0.0143039	TCP family transcription factor 4
49			MD11G1053300	0.982579	0.00275295	Unknown function
50			MD13G1007200	0.980717	0.00320504	S-adenosyl-L-methionine-dependent methyltransferases superfamily protein

## Sheet: Table S12-5
Table S12-5 List of lncRNA-miRNA-mRNA networks in fruit only
No.	lncRNA	miRNA	mRNA	correlation coefficient	p_value	annotation
1	MSTRG.60895.2	mdm-miR393a-c	MD17G1009000	0.891264	0.0423331	auxin signaling F-box 2
2	MSTRG.11457.2	mdm-miR7126-5p	MD17G1257500	0.950827	0.0129924	Protein kinase superfamily protein
