# Supplementary material for: Expression Profiles and Characteristics of Apple lncRNAs in Roots, Phloem, Leaves, Flowers, and Fruit
Source: Int J Mol Sci. 2022 May 25;23(11):5931. doi: 10.3390/ijms23115931 (PMC9180697; doi:10.3390/ijms23115931)
Supplement: Supplementary file 1 [file ijms-23-05931-s001.zip › Table S13.xlsx]

## Sheet: Sheet1
	Table S13 Information about primers
No.	Name of primers	sequence of primers (5' to 3')	TM
1	qActin-F	TGACCGAATGAGCAAGGAAATTACT	60
2	qActin-R	TACTCAGCTTTGGCAATCCACATC
3	MSTRG.121641.28-F	GGACACCTGGAAAGAGAATTG	60
4	MSTRG.121641.28-R	CCGCAAAGGAATGGGAAAT
5	MSTRG.121641.3-F	GGAAGGAGAATTGGGAGAA	60
6	MSTRG.121641.3-R	CGCAAAGGAATGGGAAAT
7	MSTRG.121644.1-F	GACCGTTGGTGTGATGAT	60
8	MSTRG.121644.1-R	CGTCTGATGGCTGAAACA
9	MSTRG.10845.1-F	CCCATCTATTGCCCTCTAAA	60
10	MSTRG.10845.1-R	CGAACCCTATTTGCTCTCT
